# Supplementary material for: Global population genomics of Salmonella enterica serotype Napoli, an emerging pathogen with an unusual epidemiologic pattern
Source: Research Square preprint supplement (doi:10.21203/rs.3.rs-8608855/v1), 2026-01-16
Supplement: Supplementary file 1 [file 120d61fe9fd9e70415990047.xlsx]

## Sheet: Data 4
Bacmet_hit	% in S. Enteritidis (n=327)	% in S. Typhimurium (n=289)	% in S. Typhi (n=165)	Gene in pan-genome	% identity in 1191 S. Napoli pan-genomes	Match length in 1191 S. Napoli pan-genomes	Bacmet Gene Length	% presence in 1191 S. Napoli pan-genomes	% of Bacmet gene length coverage in S. Napoli pan-genomes		BacMet_ID	Accession	Organism	Location in Accession	Compound	Alcohol	Acetate	Acid	Acridine	Alkane	Aromatic hydrocarbons	Base	Biguanides	Bisbenzimide	Cycloalkane	Diamidine	Hydrazine	Hydrazone	Naphthoquinone	Nitrites	Organo-mercury	Organo-sulfate	Organo-tin	Paraquat	Peroxides	Phenanthridine	Phenyl	Phenolic compounds	Polyamines	Quaternary Ammonium Compounds (QACs)	Salicylanilide	Thiazinium	Triarylmethane	Xanthene
acrA	100	100	100	acrA	91.688	397	397	100	100		BAC0005	P0AE06	Escherichia coli (strain K12)	Chromosome	Acriflavine [class: Acridine], Phenol [class: Phenolic compounds], Triclosan [class: Phenolic compounds], p-xylene [class: Aromatic hydrocarbons], Cyclohexane [class: Cycloalkane], Pentane [class: Alkane]				Acridine	Alkane	Aromatic hydrocarbons				Cycloalkane													Phenolic compounds	Polyamines
acrB	100	98.2699	98.7879	acrB	94.872	1014	1049	100	96.6635		BAC0006	P31224	Escherichia coli (strain K12)	Chromosome	Acriflavine [class: Acridine], Phenol [class: Phenolic compounds], Triclosan [class: Phenolic compounds], p-xylene [class: Aromatic hydrocarbons], Cyclohexane [class: Cycloalkane], Pentane [class: Alkane]				Acridine	Alkane	Aromatic hydrocarbons				Cycloalkane													Phenolic compounds
acrD	98.7768	97.9239	100	acrD	99.807	1037	1037	100	100		BAC0563	Q8ZN77	Salmonella enterica serovar Typhimurium	Chromosome	Copper (Cu), Zinc (Zn)
acrR/ybaH	99.6942	100	98.7879	mscK~~~acrR	88.947	190	215	100	88.3721		BAC0011	P0ACS9	Escherichia coli (strain K12)	Chromosome	Acriflavine [class: Acridine]				Acridine
bcr	100	99.654	100	bcr	93.182	396	396	100	100		BAC0041	P28246	Escherichia coli (strain K12)	Chromosome	Acriflavine [class: Acridine]				Acridine
copA	100	100	100	copA	93.157	833	834	100	99.8801		BAC0725	Q59385	Escherichia coli K-12	Chromosome	Copper (Cu)
corA	69.7248	100	100	corA	97.468	316	316	100	100		BAC0641	P0A2R8	Salmonella typhimurium (strain LT2 / SGSC1412 / ATCC 700720)	Chromosome	Magnesium (Mg), Cobalt (Co), Nickel (Ni), Manganese (Mn)
corB	100	99.308	100	corB~~~yfjD	98.678	227	227	100	100		BAC0643	Q9X621	Salmonella typhimurium (strain LT2 / SGSC1412 / ATCC 700720)	Chromosome	Cobalt (Co), Magnesium (Mg)
corC	99.6942	100	100	corC	100	292	292	100	100		BAC0088	P0A2L3	Salmonella typhimurium (strain LT2 / SGSC1412 / ATCC 700720)	Chromosome	Cobalt (Co), Magnesium (Mg)
corD	100	100	100	apaG	100	125	125	100	100		BAC0644	Q56017	Salmonella typhimurium (strain LT2 / SGSC1412 / ATCC 700720)	Chromosome	Cobalt (Co), Magnesium (Mg)
cpxA	100	100	100	cpxA	95.405	457	457	100	100		BAC0532	C4WZK5	Klebsiella pneumoniae subsp. pneumoniae NTUH-K2044	Chromosome	Hydrogen Peroxide (H2O2) [class: Peroxides], Benzylkonium Chloride (BAC) [class: Quaternary Ammonium Compounds (QACs)], Chlorhexidine [class: Biguanides]								Biguanides												Peroxides					Quaternary Ammonium Compounds (QACs)
cpxR	100	100	100	cpxR	95.279	233	232	100	100.431		BAC0533	C4WZK6	Klebsiella pneumoniae subsp. pneumoniae NTUH-K2044	Chromosome	Hydrogen Peroxide (H2O2) [class: Peroxides], Benzylkonium Chloride (BAC) [class: Quaternary Ammonium Compounds (QACs)], Chlorhexidine [class: Biguanides]								Biguanides												Peroxides					Quaternary Ammonium Compounds (QACs)
cueP	100	97.9239	99.3939	cueP	98.883	179	179	100	100		BAC0104	Q8ZL99	Salmonella enterica serovar Typhimurium	Chromosome	Copper (Cu)
cueR/ybbI	100	99.654	100	cueR	91.045	134	135	100	99.2593		BAC0105	P0A9G4	Escherichia coli (strain K12)	Chromosome	Copper (Cu)
cuiD	99.3884	99.308	99.3939	cueO	99.254	536	536	100	100		BAC0106	Q8ZRS2	Salmonella enterica serovar Typhimurium	Chromosome	Copper (Cu), Hydrogen Peroxide (H2O2) [class: Peroxides]																			Paraquat	Peroxides
cutA	99.6942	100	100	cutA	89.565	115	112	100	102.679		BAC0113	P69488	Escherichia coli (strain K12)	Chromosome	Copper (Cu)
cutC	100	97.9239	6.66667	cutC	82.258	248	248	100	100		BAC0114	P67826	Escherichia coli (strain K12)	Chromosome	Copper (Cu)
cutE/lnt	100	99.654	100	lnt	89.258	512	512	100	100		BAC0115	P23930	Escherichia coli (strain K12)	Chromosome	Copper (Cu)
cutF/nlpE	100	84.4291	99.3939	nlpE	76.293	232	236	100	98.3051		BAC0116	P40710	Escherichia coli (strain K12)	Chromosome	Copper (Cu)
dsbA	99.6942	99.308	100	dsbA	85.577	208	208	100	100		BAC0136	P0AEG4	Escherichia coli (strain K12)	Chromosome	Cadmium (Cd), Zinc (Zn), Mercury (Hg)
dsbB	99.3884	100	100	dsbB	83.66	153	176	100	86.9318		BAC0137	P0A6M2	Escherichia coli (strain K12)	Chromosome	Cadmium (Cd), Mercury (Hg)
dsbC	100	100	100	dsbC	83.544	237	236	100	100.424		BAC0138	P0AEG6	Escherichia coli (strain K12)	Chromosome	Copper (Cu)
emrA	100	99.654	99.3939	group_327	89.744	390	390	100	100		BAC0147	P27303	Escherichia coli (strain K12)	Chromosome	Phenylmercury Acetate [class: Organo-mercury], 2-Chlorophenylhydrazine [class: Hydrazine], Carbonylcyanide m-chlorophenyl hydrazone (CCCP) [class: Hydrazone], Tetrachlorosalicylanilide (TCS) [class: Salicylanilide]		Acetate										Hydrazine	Hydrazone			Organo-mercury						Phenyl				Salicylanilide
emrB	99.6942	98.6159	100	emrB	95.817	502	512	100	98.0469		BAC0148	P0AEJ0	Escherichia coli (strain K12)	Chromosome	Phenylmercury Acetate [class: Organo-mercury], 2-Chlorophenylhydrazine [class: Hydrazine], Carbonylcyanide m-chlorophenyl hydrazone (CCCP) [class: Hydrazone]		Acetate										Hydrazine	Hydrazone			Organo-mercury						Phenyl
emrD	100	99.654	100	emrD	92.386	394	394	100	100		BAC0149	P31442	Escherichia coli (strain K12)	Chromosome	Benzylkonium Chloride (BAC) [class: Quaternary Ammonium Compounds (QACs)], Sodium Dodecyl Sulfate (SDS) [class: Organo-sulfate]													Hydrazone				Organo-sulfate								Quaternary Ammonium Compounds (QACs)
emrR	100	99.654	100	mprA	93.143	175	176	100	99.4318		BAC0559	P0ACR9	Escherichia coli (strain K12)	Chromosome	Carbonyl cyanide 3-chlorophenylhydrazone (CCCP) [class: Hydrazone]												Hydrazine	Hydrazone									Phenyl
fabI	100	100	100	fabI	98.092	262	262	100	100		BAC0156	P0AEK4	Escherichia coli (strain K12)	Chromosome	Triclosan [class: Phenolic compounds]																				Peroxides			Phenolic compounds
fetB/ybbM	100	100	100	fetB	88.372	258	259	100	99.6139		BAC0166	P77307	Escherichia coli (strain K12)	Chromosome	Iron (Fe), Hydrogen Peroxide (H2O2) [class: Peroxides]																				Peroxides
fieF/yiip	100	100	99.3939	fieF	92.905	296	300	100	98.6667		BAC0167	P69380	Escherichia coli (strain K12)	Chromosome	Iron (Fe), Zinc (Zn), Cobalt (Co), Cadmium (Cd), Nickel (Ni)
glpF	100	98.9619	96.9697	glpF	92.883	281	281	100	100		BAC0181	P0AER0	Escherichia coli (strain K12)	Chromosome	Antimony (Sb), Arsenic (As), Glycerol [class: Alcohol]	Alcohol
ibpA	99.3884	99.308	100	ibpA	97.81	137	137	100	100		BAC0194	P0C054	Escherichia coli (strain K12)	Chromosome	Hydrogen Peroxide (H2O2) [class: Peroxides]																				Peroxides
ibpB	100	99.654	100	ibpB	88.028	142	142	100	100		BAC0195	P0C058	Escherichia coli (strain K12)	Chromosome	Hydrogen Peroxide (H2O2) [class: Peroxides]																				Peroxides
marA	100	100	100	marA	95.238	126	127	100	99.2126		BAC0560	P0ACH5	Escherichia coli (strain K12)	Chromosome	Cyclohexane [class: Cycloalkane], Diphenyl Ether [class: Phenyl], n-hexane [class: Alkane]					Alkane					Cycloalkane												Phenyl
marR	99.6942	100	100	marR	91.667	144	144	100	100		BAC0561	P27245	Escherichia coli (strain K12)	Chromosome	Cyclohexane [class: Cycloalkane], Diphenyl Ether [class: Phenyl], n-hexane [class: Alkane]					Alkane					Cycloalkane												Phenyl
mdfA/cmr	100	98.9619	100	group_271	89.563	412	410	100	100.488		BAC0208	P0AEY8	Only gram -ve, E. coli (Strain K12)	Chromosome	Benzylkonium Chloride (BAC) [class: Quaternary Ammonium Compounds (QACs)], Ethidium Bromide [class: Phenanthridine], Acriflavine [class: Acridine], Tetraphenylphosphonium (TPP) [class: Quaternary Ammonium Compounds (QACs)], Sodium Hydroxide (NaOH) [class: Base], Rhodamine 6G [class: Xanthene]				Acridine			Base														Phenanthridine	Phenyl			Quaternary Ammonium Compounds (QACs)				Xanthene
mdtG/yceE	100	99.654	98.7879	mdtG	90.323	403	408	100	98.7745		BAC0215	P25744	Escherichia coli (strain K12)	Chromosome	Sodium Deoxycholate (SDC) [class: Acid]			Acid																										Xanthene
mdtK/ydhE	100	98.6159	99.3939	mdtK	92.56	457	457	100	100		BAC0218	P37340	Escherichia coli (strain K12)	Chromosome	Tetraphenylphosphonium (TPP) [class: Quaternary Ammonium Compounds (QACs)], Sodium Deoxycholate (SDC) [class: Acid], Ethidium Bromide [class: Phenanthridine], Benzylkonium Chloride (BAC) [class: Quaternary Ammonium Compounds (QACs)], Acriflavine [class: Acridine]			Acid	Acridine																	Phenanthridine	Phenyl			Quaternary Ammonium Compounds (QACs)
mdtM/yjiO	98.4709	94.1176	100	mdtM	85.294	408	410	100	99.5122		BAC0219	P39386	Escherichia coli (strain K12)	Chromosome	Tetraphenylphosphonium (TPP) [class: Quaternary Ammonium Compounds (QACs)], Ethidium Bromide [class: Phenanthridine], Acriflavine [class: Acridine], Tetraphenylarsonium (TPA) [class: Quaternary Ammonium Compounds (QACs)]				Acridine																	Phenanthridine	Phenyl			Quaternary Ammonium Compounds (QACs)
mgtA	98.7768	99.654	100	mgtA	98.895	905	902	100	100.333		BAC0642	P36640	Salmonella typhimurium (strain LT2 / SGSC1412 / ATCC 700720)	Chromosome	Cobalt (Co), Magnesium (Mg)
mntH/yfeP	100	99.308	98.1818	mntH	93.689	412	412	100	100		BAC0251	P0A769	Escherichia coli (strain K12)	Chromosome	Manganese (Mn), Iron (Fe), Cadmium (Cd), Cobalt (Co), Zinc (Zn)
mntR	99.6942	99.654	100	mntR	90.968	155	155	100	100		BAC0253	P0A9F1	Escherichia coli	Chromosome	Manganese (Mn), Magnesium (Mg)
modA	99.6942	100	100	modA	86.77	257	257	100	100		BAC0609	P37329	Escherichia coli (strain K12)	Chromosome	Tungsten (W), Molybdenum (Mo)
modB	100	99.654	100	modB	95.197	229	229	100	100		BAC0610	P0AF01	Escherichia coli (strain K12)	Chromosome	Tungsten (W), Molybdenum (Mo)
modC	100	100	100	modC	91.761	352	352	100	100		BAC0611	P09833	Escherichia coli (strain K12)	Chromosome	Tungsten (W), Molybdenum (Mo)
modE	100	100	100	modE	89.313	262	262	100	100		BAC0608	P0A9G8	Escherichia coli (strain K12)	Chromosome	Tungsten (W), Molybdenum (Mo)
nfsA	65.4434	94.1176	100	nfsA	87.917	240	240	100	100		BAC0540	P17117	Escherichia coli K12	Chromosome	Chromium (Cr)
nikR	100	99.654	100	nikR	98.496	133	133	100	100		BAC0275	P0A6Z6	Escherichia coli (strain K12)	Chromosome	Nickel (Ni)
ostA/lptD	99.6942	100	99.3939	lptD	91.476	786	784	100	100.255		BAC0296	P31554	Escherichia coli (strain K12)	Chromosome	n-hexane [class: Alkane]					Alkane
oxyRkp	100	100	100	oxyR	98.361	305	305	100	100		BAC0536	C4WZN6	Klebsiella pneumoniae NTUH-K2044	Chromosome	Hydrogen Peroxide (H2O2) [class: Peroxides], Sodium Deoxycholate (SDC) [class: Acid], Acriflavine [class: Acridine], Rhodamine 6G [class: Xanthene], Ethidium Bromide [class: Phenanthridine], Sodium Dodecyl Sulfate (SDS) [class: Organo-sulfate]			Acid	Acridine													Organo-sulfate			Peroxides	Phenanthridine								Xanthene
phoB	99.6942	100	100	phoP	93.274	223	237	100	94.0928		BAC0530	C4X6T6	Klebsiella pneumoniae NTUH-K2044	Chromosome	Benzylkonium Chloride (BAC) [class: Quaternary Ammonium Compounds (QACs)], Chlorhexidine [class: Biguanides]								Biguanides																	Quaternary Ammonium Compounds (QACs)
phoR	99.6942	98.9619	100	phoQ	80.903	487	488	100	99.7951		BAC0531	C4X6T5	Klebsiella pneumoniae NTUH-K2044	Chromosome	Benzylkonium Chloride (BAC) [class: Quaternary Ammonium Compounds (QACs)], Chlorhexidine [class: Biguanides]								Biguanides																	Quaternary Ammonium Compounds (QACs)
pitA	99.0826	98.9619	100	pitA	92.585	499	499	100	100		BAC0312	P0AFJ7	Escherichia coli (strain K12)	Chromosome	Zinc (Zn), Tellurium (Te)
pmrG	100	98.6159	99.3939	ais~~~pmrG	97.512	201	201	100	100		BAC0486	Q8ZNF4	Salmonella typhimurium (strain LT2 / SGSC1412 / ATCC 700720)	Chromosome	Iron (Fe)
pstA	99.6942	100	100	pstA	95.608	296	296	100	100		BAC0315	P07654	Escherichia coli (strain K12)	Chromosome	Arsenic (As)
pstB	100	99.654	100	pstB	98.444	257	257	100	100		BAC0316	P0AAH0	Escherichia coli (strain K12)	Chromosome	Arsenic (As)
pstC	100	100	100	pstC	97.492	319	319	100	100		BAC0317	P0AGH8	Escherichia coli (strain K12)	Chromosome	Arsenic (As)
pstS	100	100	100	pstS	92.197	346	346	100	100		BAC0318	P0AG82	Escherichia coli (strain K12)	Chromosome	Arsenic (As)
robA	99.6942	100	100	robA	92.388	289	289	100	100		BAC0334	P0ACI0	Escherichia coli O157:H7	Chromosome	Silver (Ag), Mercury (Hg), Cadmium (Cd), Cyclohexane [class: Cycloalkane], Pentane [class: Alkane], n-hexane [class: Alkane], Diphenyl Ether [class: Phenyl]					Alkane					Cycloalkane												Phenyl
sitA	100	100	99.3939	sitA	100	305	305	100	100		BAC0349	Q9XCS2	Escherichia coli O45:K1 (strain S88 / ExPEC)	Plasmid pECOS88 (Escherichia coli O45:K1 (strain S88 / ExPEC)), Plasmid pCVM29188_146 (Salmonella enterica subsp. enterica serovar Kentucky str. CVM29188)	Manganese (Mn), Iron (Fe), Hydrogen Peroxide (H2O2) [class: Peroxides]																				Peroxides
sitB	100	100	100	sitB	99.267	273	273	100	100		BAC0350	Q9XCS1	Escherichia coli (strain SMS-3-5 / SECEC)	Plasmid pSMS35_130 (Escherichia coli (strain SMS-3-5 / SECEC)), Plasmid pCS0010A (Salmonella enterica subsp. enterica serovar Kentucky)	Manganese (Mn), Iron (Fe), Hydrogen Peroxide (H2O2) [class: Peroxides]																				Peroxides
sitC	99.6942	100	100	sitC	100	286	286	100	100		BAC0351	Q9XCS0	Escherichia coli (strain SMS-3-5 / SECEC)	Plasmid pSMS35_130 (Escherichia coli (strain SMS-3-5 / SECEC)), Plasmid pPag3 (Pantoea vagans (strain C9-1) (Pantoea agglomerans (strain C9-1)))	Manganese (Mn), Iron (Fe), Hydrogen Peroxide (H2O2) [class: Peroxides]																				Peroxides
sitD	100	99.654	100	sitD	99.291	282	282	100	100		BAC0352	Q9XCR9	Escherichia coli (strain SMS-3-5 / SECEC	Plasmid pSMS35_130 (Escherichia coli (strain SMS-3-5 / SECEC)), Plasmid pPag3 (Pantoea vagans (strain C9-1) (Pantoea agglomerans (strain C9-1)))	Manganese (Mn), Iron (Fe), Hydrogen Peroxide (H2O2) [class: Peroxides]																				Peroxides
smdA	100	99.654	98.7879	mdlB	79.046	587	591	100	99.3232		BAC0353	A7VN01	Serratia marcescens	Chromosome	4,6-diamidino-2-phenylindole (DAPI) [class: Diamidine], Hoechst 33342 [class: Bisbenzimide]									Bisbenzimide		Diamidine											Phenyl
smdB	98.7768	100	100	group_2061	79.561	592	592	100	100		BAC0354	A7VN02	Serratia marcescens	Chromosome	4,6-diamidino-2-phenylindole (DAPI) [class: Diamidine], Hoechst 33342 [class: Bisbenzimide]									Bisbenzimide		Diamidine											Phenyl
sodA	99.6942	100	100	sodA	97.573	206	206	100	100		BAC0368	P00448	Escherichia coli K12	Chromosome	Selenium (Se), Hydrogen Peroxide (H2O2) [class: Peroxides]																				Peroxides
sodB	100	100	100	sodB	94.301	193	225	100	85.7778		BAC0707	P0AGD3	Escherichia coli K12	Chromosome	Selenium (Se), Hydrogen Peroxide (H2O2) [class: Peroxides]																				Peroxides
sugE	100	100	100	sugE	85.714	105	105	100	100		BAC0378	P69937	only gram -ve, Escherichia coli	Plasmid IncN p541 (Escherichia coli), Plasmid pIW759 (Salmonella typhimurium)	Cetrimide (CTM) [class: Quaternary Ammonium Compounds (QACs)], Cetylpyridinium Chloride (CPC) [class: Quaternary Ammonium Compounds (QACs)], Tetraphenylphosphonium (TPP) [class: Quaternary Ammonium Compounds (QACs)], Benzylkonium Chloride (BAC) [class: Quaternary Ammonium Compounds (QACs)], Ethidium Bromide [class: Phenanthridine], Sodium Dodecyl Sulfate (SDS) [class: Organo-sulfate]																	Organo-sulfate				Phenanthridine	Phenyl			Quaternary Ammonium Compounds (QACs)
tolC	100	99.654	98.1818	group_2384	91.332	473	493	100	95.9432		BAC0393	P02930	Escherichia coli (strain K12)	Chromosome	Phenol [class: Phenolic compounds], Triclosan [class: Phenolic compounds], Sodium Deoxycholate (SDC) [class: Acid], Sodium Cholate [class: Acid], Sodium Taurodeoxycholate [class: Acid], Sodium Dodecyl Sulfate (SDS) [class: Organo-sulfate], Proflavin [class: Acridine], Acriflavine [class: Acridine], Ethidium Bromide [class: Phenanthridine], Tetraphenylphosphonium (TPP) [class: Quaternary Ammonium …			Acid	Acridine										Naphthoquinone			Organo-sulfate				Phenanthridine	Phenyl	Phenolic compounds		Quaternary Ammonium Compounds (QACs)				Xanthene
ychH	100	99.654	0	ychH	92.391	92	92	100	100		BAC0434	P0AB49	Escherichia coli (strain K12)	Chromosome	Cadmium (Cd), Hydrogen Peroxide (H2O2) [class: Peroxides]																				Peroxides
ydeI	96.0245	99.654	0	group_4158	79.231	130	130	100	100		BAC0436	P31130	Escherichia coli (strain K12)	Chromosome	Hydrogen Peroxide (H2O2) [class: Peroxides]																				Peroxides
ygiW	99.3884	100	100	ydeI	89.231	130	130	100	100		BAC0445	P0ADU5	Escherichia coli	Plasmid pMR-1 (Shewanella oneidensis (strain MR-1))	Cadmium (Cd), Tributyltin (TBT) [class: Organo-tin], Hydrogen Peroxide (H2O2) [class: Peroxides]																	Organo-sulfate	Organo-tin		Peroxides
yhcN	99.6942	100	100	group_5669	80.46	87	87	100	100		BAC0446	P64614	Escherichia coli (strain K12)	Chromosome	Cadmium (Cd), Hydrogen Peroxide (H2O2) [class: Peroxides], Hydrochloric acid (HCl) [class: Acid]			Acid																	Peroxides
yieF	100	100	100	ssuE	92.513	187	188	100	99.4681		BAC0541	P0AGE6	Escherichia coli K12	Chromosome	Chromium (Cr), Vanadium (V), Molybdenum (Mo), Methylene Blue [class: Thiazinium]																											Thiazinium
yodD	100	99.308	99.3939	yodD	92	75	75	100	100		BAC0451	P64519	Escherichia coli (strain K12)	Chromosome	Cadmium (Cd), Hydrogen Peroxide (H2O2) [class: Peroxides], Hydrochloric acid (HCl) [class: Acid]			Acid																	Peroxides
zitB/ybgR	99.3884	100	100	zitB	86.149	296	313	100	94.5687		BAC0459	P75757	Escherichia coli (strain K12)	Chromosome	Zinc (Zn)
zntA/yhhO	99.3884	99.654	100	zntA	85.226	731	732	100	99.8634		BAC0461	P37617	Escherichia coli (strain K12)	Chromosome	Lead (Pb), Cadmium (Cd), Zinc (Zn)
zntR/yhdM	100	99.654	100	zntR	93.478	138	141	100	97.8723		BAC0462	P0ACS5	Escherichia coli (strain K12)	Chromosome	Zinc (Zn)
znuA/yebL	99.6942	100	100	znuA	86.624	314	310	100	101.29		BAC0463	P39172	Escherichia coli (strain K12)	Chromosome	Zinc (Zn)
znuB/yebI	100	100	100	znuB	92.72	261	261	100	100		BAC0464	P39832	Escherichia coli (strain K12)	Chromosome	Zinc (Zn)
znuC/yebM	100	100	100	znuC	95.618	251	251	100	100		BAC0465	P0A9X1	Escherichia coli (strain K12)	Chromosome	Zinc (Zn)
zraP	99.6942	99.654	100	zraP	100	151	151	100	100		BAC0466	Q9L9I0	Salmonella typhimurium (strain LT2/SGSC1412/ATCC 700720)Â	Chromosome	Zinc (Zn)
zraR/hydH	100	98.6159	100	zraR	87.872	437	441	100	99.093		BAC0467	P14375	Escherichia coli (strain K12)	Chromosome	Zinc (Zn)
zupT/ygiE	99.3884	100	100	zupT	92.607	257	257	100	100		BAC0469	P0A8H3	Escherichia coli (strain K12)	Chromosome	Zinc (Zn), Iron (Fe), Cobalt (Co), Nickel (Ni), Copper (Cu), Cadmium (Cd)
zur/yjbK	100	100	100	zur	92.982	171	171	100	100		BAC0470	P0AC51	Escherichia coli (strain K12)	Chromosome	Zinc (Zn)
iclR	100	100	100	iclR	91.971	274	274	99.916	100		BAC0196	P16528	Escherichia coli (strain K12)	Chromosome	Sodium acetate [class: Acetate]		Acetate
kpnF	100	100	100	mdtI	86.239	109	109	99.916	100		BAC0477	C4X7Z4	Klebsiella pneumoniae NTUH-K2044	Chromosome	Sodium Dodecyl Sulfate (SDS) [class: Organo-sulfate], Sodium Deoxycholate (SDC) [class: Acid], Benzylkonium Chloride (BAC) [class: Quaternary Ammonium Compounds (QACs)], Chlorhexidine [class: Biguanides], Triclosan [class: Phenolic compounds], Methyl Viologen [class: Paraquat], Hydrogen Peroxide (H2O2) [class: Peroxides]			Acid					Biguanides									Organo-sulfate		Paraquat	Peroxides			Phenolic compounds		Quaternary Ammonium Compounds (QACs)
kpnO	100	99.308	100	ompC	77.953	381	365	99.916	104.384		BAC0529	C4XBC3	Klebsiella pneumoniae NTUH-K2044	Chromosome	Hydrogen Peroxide (H2O2) [class: Peroxides], Carbonyl cyanide 3-chlorophenylhydrazone (CCCP) [class: Hydrazone], Benzylkonium Chloride (BAC) [class: Quaternary Ammonium Compounds (QACs)], Chlorhexidine [class: Biguanides], Sodium Nitrite (NaNo2) [class: Nitrites]								Biguanides					Hydrazone		Nitrites					Peroxides		Phenyl			Quaternary Ammonium Compounds (QACs)
mdtJ/ebrB/ydgF	100	100	100	group_2406	83.898	118	121	99.916	97.5207		BAC0217	Q3Z1V3	Shigella sonnei (strain Ss046)	Chromosome	Spermidine [class: Polyamines]																							Phenolic compounds	Polyamines
rcnB/yohN	100	100	100	rcnB	76.364	110	112	99.916	98.2143		BAC0331	P64534	Escherichia coli (strain K12)	Chromosome	Nickel (Ni), Cobalt (Co)
baeR	100	100	100	baeR	100	240	240	99.8321	100		BAC0596	D0ZNE3	Salmonella Typhimurium	Chromosome	Copper (Cu), Zinc (Zn), Tungsten (W), Sodium Deoxycholate (SDC) [class: Acid]			Acid
baeS	100	98.9619	100	baeS	98.715	467	467	99.8321	100		BAC0597	D0ZNE2	Salmonella Typhimurium	Chromosome	Copper (Cu), Zinc (Zn), Tungsten (W), Sodium Deoxycholate (SDC) [class: Acid]			Acid
mdtA	99.3884	100	100	mdtA	99.274	413	413	99.8321	100		BAC0645	D0ZND8	Salmonella enterica serovar Typhimurium	Chromosome	Zinc (Zn)
mdtC	100	99.654	100	mdtC	99.61	1026	1026	99.8321	100		BAC0647	D0ZNE0	Salmonella enterica serovar Typhimurium	Chromosome	Zinc (Zn)
mntP/yebN	99.6942	99.308	100	mntP	90.957	188	188	99.8321	100		BAC0252	P76264	Escherichia coli K-12	Chromosome	Manganese (Mn), Magnesium (Mg), Methyl Viologen [class: Paraquat], Hydrogen Peroxide (H2O2) [class: Peroxides]																		Organo-tin	Paraquat	Peroxides
soxR	100	100	99.3939	group_2555	96.053	152	154	99.8321	98.7013		BAC0370	P0ACS2	Escherichia coli (strain K12)	Chromosome	Methyl Viologen [class: Paraquat]																			Paraquat
soxS	100	99.654	99.3939	soxS_E52K	95.327	107	107	99.8321	100		BAC0371	P0A9E2	Escherichia coli (strain K12)	Chromosome	Zinc (Zn), Cyclohexane [class: Cycloalkane]					Alkane					Cycloalkane
emmdR	100	97.5779	99.3939	norM	86.275	459	462	99.7481	99.3506		BAC0146	D5CJ69	Enterobacter cloacae	Chromosome	Benzylkonium Chloride (BAC) [class: Quaternary Ammonium Compounds (QACs)], Ethidium Bromide [class: Phenanthridine], Acriflavine [class: Acridine], Rhodamine 6G [class: Xanthene]				Acridine																	Phenanthridine				Quaternary Ammonium Compounds (QACs)				Xanthene
bhsA/ycfR/comC	99.6942	100	100	group_5702	91.765	85	85	97.1453	100	absent in HC1543c	BAC0049	P0AB40	Escherichia coli (strain K12)	Chromosome	Copper (Cu)
comR/ycfQ	100	100	100	comR	80	210	210	97.1453	100	absent in HC1543c	BAC0076	P75952	Escherichia coli (strain K12)	Chromosome	Copper (Cu)
tehA	99.6942	100	99.3939	tehA	87.234	329	330	96.4736	99.697	absent in HC20879	BAC0384	P25396	Escherichia coli (strain K12)	Chromosome	Tellurium (Te), Proflavin [class: Acridine], Tetraphenylphosphonium (TPP) [class: Quaternary Ammonium Compounds (QACs)], Ethidium Bromide [class: Phenanthridine], Crystal Violet [class: Triarylmethane], Dequalinium [class: Quaternary Ammonium Compounds (QACs)], Methyl Viologen [class: Paraquat]				Acridine															Paraquat		Phenanthridine	Phenyl			Quaternary Ammonium Compounds (QACs)			Triarylmethane
tehB	100	100	100	tehB	84.184	196	197	96.4736	99.4924	absent in HC20879	BAC0385	P25397	Escherichia coli (strain K12)	Chromosome	Tellurium (Te), Proflavin [class: Acridine]				Acridine
rcnR/yohL	100	100	100	-	-	-	-	0.167926			BAC0332	P64530	Escherichia coli (strain K12)	Chromosome	Cobalt (Co), Nickel (Ni), Iron (Fe)
actP/yjcG	99.6942	99.654	98.7879	actP	96.721	549	549	99.916	100		BAC0564	P32705	Escherichia coli (strain K12)	Chromosome	Sodium Glycocholate [class: Acid], Sodium acetate [class: Acetate]		Acetate	Acid
rpoS	96.9419	95.1557	89.697	rpoS	99.091	330	330	99.916	100		BAC0335	P35540	Escherichia coli, Shigella flexneri	Chromosome	Hydrochloric acid (HCl) [class: Acid], Sodium hydroxide (NaOH) [class: Base]			Acid				Base
mdtB	99.6942	99.654	98.7879	mdtB	98.846	1040	1040	99.8321	100		BAC0646	D0ZND9	Salmonella enterica serovar Typhimurium	Chromosome	Zinc (Zn)
smvA/emrB	99.6942	98.6159	97.5758	smvA	98.99	495	495	99.8321	100		BAC0367	D0ZXQ3	Salmonella typhimurium	Chromosome	Methyl Viologen [class: Paraquat], Tetraphenylphosphonium (TPP) [class: Quaternary Ammonium Compounds (QACs)], Hoechst 33342 [class: Bisbenzimide], Ethidium Bromide [class: Phenanthridine], Cetrimide (CTM) [class: Quaternary Ammonium Compounds (QACs)], Benzylkonium Chloride (BAC) [class: Quaternary Ammonium Compounds (QACs)], Acriflavine [class: Acridine]				Acridine					Bisbenzimide										Paraquat		Phenanthridine	Phenyl			Quaternary Ammonium Compounds (QACs)
opmD/nmpC	95.7187	98.2699	0	ompD	100	362	362	99.7481	100		BAC0290	P37592	Salmonella typhimurium (strain LT2 / SGSC1412 / ATCC 700720)	Chromosome	Methyl Viologen [class: Paraquat]																			Paraquat
yddg/emrE	95.4128	98.9619	0	yddG	98.635	293	293	99.7481	100		BAC0435	D0ZXP9	Salmonella typhimurium (strain 14028s/SGSC 2262)	Chromosome	Methyl Viologen [class: Paraquat]																			Paraquat
acrE/envC	95.7187	98.9619	0	group_2322	88.684	380	385	94.8783	98.7013	absent in HC1450	BAC0009	P24180	Escherichia coli (strain K12)	Chromosome	Acriflavine [class: Acridine], Sodium Dodecyl Sulfate (SDS) [class: Organo-sulfate], Sodium Deoxycholate (SDC) [class: Acid], Tetraphenylphosphonium (TPP) [class: Quaternary Ammonium Compounds (QACs)], Benzylkonium Chloride (BAC) [class: Quaternary Ammonium Compounds (QACs)], Methyl Viologen [class: Paraquat], Ethidium Bromide [class: Phenanthridine]			Acid	Acridine													Organo-sulfate		Paraquat		Phenanthridine	Phenyl			Quaternary Ammonium Compounds (QACs)
golS	95.7187	98.6159	0								BAC0182	Q8ZRG6	Salmonella typhimurium (strain LT2 / SGSC1412 / ATCC 700720)	Chromosome	Gold (Au)
rcnA/yohM	98.4709	58.4775	0								BAC0330	P76425	Escherichia coli (strain K12)	Chromosome	Cobalt (Co), Nickel (Ni), Iron (Fe)
gesA	95.107	97.9239	0								BAC0178	Q8ZRG8	Salmonella typhimurium (strain LT2 / SGSC1412 / ATCC 700720)	Chromosome	Gold (Au), Methylene Blue [class: Thiazinium], Crystal Violet [class: Triarylmethane]																											Thiazinium	Triarylmethane
gesC	94.8012	97.9239	0								BAC0180	Q8ZRH0	Salmonella typhimurium (strain LT2 / SGSC1412 / ATCC 700720)	Chromosome	Gold (Au), Methylene Blue [class: Thiazinium], Crystal Violet [class: Triarylmethane]																											Thiazinium	Triarylmethane
golT	93.578	97.9239	0								BAC0183	Q8ZRG7	Salmonella typhimurium (strain LT2 / SGSC1412 / ATCC 700720)	Chromosome	Copper (Cu), Gold (Au)
acrF/envD	97.8593	97.2318	0	adeB	88.674	1033	1034	94.8783	99.9033	absent in HC1450	BAC0010	P24181	Escherichia coli (strain K12)	Chromosome	Acriflavine [class: Acridine], Sodium Dodecyl Sulfate (SDS) [class: Organo-sulfate], Sodium Deoxycholate (SDC) [class: Acid], Tetraphenylphosphonium (TPP) [class: Quaternary Ammonium Compounds (QACs)], Benzylkonium Chloride (BAC) [class: Quaternary Ammonium Compounds (QACs)], Methyl Viologen [class: Paraquat], Ethidium Bromide [class: Phenanthridine]			Acid	Acridine													Organo-sulfate		Paraquat		Phenanthridine	Phenyl			Quaternary Ammonium Compounds (QACs)
arsB	0	0.346021	0	arsB	95.592	431	429	3.44249	100.466		BAC0031	P08691	Escherichia coli	Plasmid R773 (E. coli), Plasmid IncN R46 (E. coli), Plasmid R46 (Salmonella typhimurium)	Arsenic (As), Antimony (Sb)
arsC	0	0.346021	0	arsC	93.617	141	141	3.44249	100		BAC0582	P08692	Escherichia coli	Plasmid R773	Arsenic (As), Antimony (Sb)
arsD	0	0.346021	0	arsD	94.167	120	120	3.44249	100		BAC0033	P46003	Escherichia coli	Plasmid R773 (E. coli), Plasmid R64 (Salmonella typhimurium)	Arsenic (As)
arsA	0	0.346021	0	group_121,group_124	89.7 - 95.7	583	583	3.52645	100		BAC0572	P08690	Escherichia coli	Plasmid R773	Arsenic (As), Antimony (Sb)
arsB	0	25.6055	0	group_249	98.135	429	429	0.167926	100		BAC0578	O50594	Acidiphilium multivorum (strain DSM 11245 / JCM 8867 / AIU301)	Plasmid pKW301	Arsenic (As), Antimony (Sb)
arsC	0	26.9896	0	group_2915, group_2923	92.2 - 97.1	141	141	0.251889	100		BAC0584	O50595	Acidiphilium multivorum (strain DSM 11245 / JCM 8867 / AIU301)	Plasmid pKW301	Arsenic (As), Antimony (Sb)
arsA	0	25.6055	0	group_3866, group_123	92.6 - 95.8	583	583	5.70949	100		BAC0571	O50593	Acidiphilium multivorum (strain DSM 11245 / JCM 8867 / AIU301)	Plasmid pKW301	Arsenic (As), Antimony (Sb)
arsH	0	1.7301	0	group_3921,arsH,group_889,group_1976	77.2 - 79.5	230-236	232	9.06801	99.1379		BAC0034	E8PS81	Yersinia pestis Java 9	Plasmid pKPN-IT (Klebsiella pneumoniae), Plasmid R485 (Morganella morganii (Proteus morganii))	Arsenic (As)
arsR	0	25.2595	0	group_4082	94.017	117	117	0.3	100		BAC0591	P52144	Escherichia coli	Plasmid IncN R46	Arsenic (As), Antimony (Sb), Bismuth (Bi)
arsD	0	25.6055	0	group_4416, group_3916, group_3904	88.3 - 92.5	120	120	5.79345	100		BAC0587	P52148	Escherichia coli	Plasmid IncN R46	Arsenic (As), Antimony (Sb)
arsB	0	0.692042	0	group_4417, group_250	95.1- 95.8	429	429	5.62552	100		BAC0576	P52146	Escherichia coli	Plasmid IncN R46	Arsenic (As), Antimony (Sb)
arsC	0	0	0	group_4435	93.617	141	141	5.54156	100		BAC0583	P52147	Escherichia coli	Plasmid IncN R46	Arsenic (As), Antimony (Sb)
arsR	0	1.38408	0	group_4689, group_4062	94- 98.3	117	117	8.98405	100		BAC0589	P15905	Escherichia coli	Plasmid R773	Arsenic (As), Antimony (Sb), Bismuth (Bi)
fetA/ybbL	97.8593	0.692042	0								BAC0165	P77279	Escherichia coli (strain K12)	Chromosome	Iron (Fe), Hydrogen Peroxide (H2O2) [class: Peroxides]																				Peroxides
gesB	95.4128	97.2318	0								BAC0179	Q8ZRG9	Salmonella typhimurium (strain LT2 / SGSC1412 / ATCC 700720)	Chromosome	Gold (Au), Methylene Blue [class: Thiazinium], Crystal Violet [class: Triarylmethane]																											Thiazinium	Triarylmethane
silB	0.30581	34.2561	0								BAC0342	Q9ZHD0	Salmonella typhimurium	Plasmid pMG101 (Salmonella typhimurium)	Silver (Ag)
silE	0.30581	34.2561	0								BAC0344	Q9Z4N3	Salmonella typhimurium	Plasmid pMG101 (Salmonella typhimurium)	Silver (Ag)
silA	0.30581	33.91	0								BAC0341	Q9ZHC9	Salmonella typhimurium	Plasmid pMG101 (Salmonella typhimurium)	Silver (Ag)
silC	0.30581	33.91	0								BAC0343	Q9ZHD2	Salmonella typhimurium	Plasmid pMG101 (Salmonella typhimurium)	Silver (Ag)
silR	0.30581	33.91	0								BAC0347	Q9ZHD3	Salmonella typhimurium	Plasmid pMG101 (Salmonella typhimurium)	Silver (Ag)
silS	0.30581	33.91	0								BAC0348	Q9ZHD4	Salmonella typhimurium	Plasmid pMG101 (Salmonella typhimurium)	Silver (Ag)
silF	0.30581	32.1799	0								BAC0345	Q9ZHD1	Salmonella typhimurium	Plasmid pMG101 (Salmonella typhimurium)	Silver (Ag)
silP	0.30581	32.1799	0								BAC0346	Q9ZHC7	Salmonella typhimurium	Plasmid pMG101 (Salmonella typhimurium), Plasmid pLVPK (Klebsiella pneumoniae)	Silver (Ag)
merA	1.83486	29.7578	33.3333								BAC0652	O66017	Pseudomonas stutzeri	Plasmid pPB	Mercury (Hg)
merD	1.83486	31.8339	33.3333								BAC0667	P08654	Serratia marcescens	Plasmid pDU1358	Mercury (Hg)
merE	1.83486	27.3356	33.3333								BAC0672	Q79BE4	Pseudomonas stutzeri	Plasmid pPB	Mercury (Hg)
merP	2.14067	30.4498	33.3333								BAC0231	P13113	Serratia marcescens	Plasmid pDU1358 (Serratia marcescens)	Mercury (Hg)
merR	2.14067	25.2595	32.7273								BAC0687	Q79BG7	Pseudomonas stutzeri	Plasmid pPB	Mercury (Hg)
merT	2.14067	24.9135	32.7273								BAC0693	Q79F00	Pseudomonas sp. K-62	Plasmid pMR26Â (Pseudomonas sp. K-62)	Mercury (Hg)
qacEdelta1	1.83486	26.2976	32.1212								BAC0323	Q7BQY4	Both gram +ve and -ve , Staphylococcus aureus, E. faecalis, P. aeruginosa	Plasmids Rms149, In786, R388-R151 hybrid, pOZ176, pKM0509, R1033, pKLC102, pLQ1001	Benzylkonium Chloride (BAC) [class: Quaternary Ammonium Compounds (QACs)], Ethidium Bromide [class: Phenanthridine], Acriflavine [class: Acridine], Chlorhexidine [class: Biguanides], Pyronin Y [class: Xanthene], Rhodamine 6G [class: Xanthene], Methyl Viologen [class: Paraquat], Tetraphenylphosphonium (TPP) [class: Quaternary Ammonium Compounds (QACs)], 4,6-diamidino-2-phenylindole (DAPI) [class: …			Acid	Acridine				Biguanides			Diamidine						Organo-sulfate		Paraquat		Phenanthridine	Phenyl			Quaternary Ammonium Compounds (QACs)			Triarylmethane	Xanthene
pcoA	0.30581	30.4498	0								BAC0303	Q47452	Escherichia coli	Plasmid pRJ1004	Copper (Cu)
pcoB	0.30581	29.7578	0								BAC0304	Q47453	Escherichia coli	Plasmid pRJ1004	Copper (Cu)
pcoC	0.30581	30.4498	0								BAC0305	Q47454	Escherichia coli	Plasmid pRJ1004	Copper (Cu)
pcoD	0	28.3737	0								BAC0306	Q47455	Escherichia coli	Plasmid pRJ1004	Copper (Cu)
pcoE	0.30581	30.4498	0								BAC0307	Q47459	Escherichia coli	Plasmid pRJ1004	Copper (Cu), Silver (Ag)
pcoR	0	28.7197	0								BAC0308	Q47456	Escherichia coli	Plasmid pRJ1004	Copper (Cu)
pcoS	0	28.3737	0								BAC0309	Q47457	Escherichia coli	Plasmid pRJ1004	Copper (Cu)
terA	0.917431	15.917	0								BAC0386	P18778	Alcaligenes sp.	Plasmid IncHI2 pMER610 (Alcaligenes sp.), Plasmid pK2044 (Klebsiella pneumoniae subsp. pneumoniae NTUH-K2044)	Tellurium (Te)
terB	0.917431	16.609	0								BAC0387	P18779	Alcaligenes sp.	Plasmid IncHI2 pMER610 (Alcaligenes sp.), Plasmid pPag2 (Pantoea vagans (strain C9-1) (Pantoea agglomerans (strain C9-1)))	Tellurium (Te)
terC	0.917431	16.263	0								BAC0388	P18780	Alcaligenes sp.	Plasmid IncHI2 pMER610 (Alcaligenes sp.), Plasmid pK2044 (Klebsiella pneumoniae subsp. pneumoniae NTUH-K2044 )	Tellurium (Te)
terD	0.917431	16.609	0								BAC0389	P18781	Alcaligenes sp.	Plasmid IncHI2 pMER610 (Alcaligenes sp.), Plasmid IncHI2 R478 (Serratia marcescens), Plasmid pK29 (Klebsiella pneumoniae)	Tellurium (Te)
terE	0.917431	16.609	0								BAC0390	P18782	Alcaligenes sp.	Plasmid IncHI2 pMER610 (Alcaligenes sp.), Plasmid IncHI2 R478 (Serratia marcescens)	Tellurium (Te)
terW	0.917431	16.609	0								BAC0391	P75010	Serratia marcescens subsp. Marcescens	Plasmid IncHI2 R478 (Serratia marcescens), Plasmid pK29 (Klebsiella pneumoniae), Plasmid pEC-IMP (Enterobacter cloacae)	Tellurium (Te)
terZ	0.917431	16.609	0								BAC0392	Q52353	Serratia marcescens subsp. Marcescens	Plasmid IncHI2 R478 (Serratia marcescens), Plasmid pK29 (Klebsiella pneumoniae)	Tellurium (Te)
arsB	0	0.692042	0								BAC0577	P74985	Yersinia enterocolitica	Plasmid pYV	Arsenic (As)
corA	0.611621	0	15.1515								BAC0086	P0ABI4	Escherichia coli (strain K12)	Chromosome	Magnesium (Mg), Cobalt (Co), Nickel (Ni), Manganese (Mn)
fecD	0	0.346021	0								BAC0163	P15029	Escherichia coli (strain K12)	Chromosome	Nickel (Ni), Cobalt (Co)
fecE	0	0.346021	0								BAC0164	P15031	Escherichia coli (strain K12)	Chromosome	Nickel (Ni), Cobalt (Co)
merB	0	4.15225	0								BAC0659	P08664	Serratia marcescens	Plasmid pDU1358	Mercury (Hg), Phenylmercury Acetate [class: Organo-mercury]		Acetate														Organo-mercury						Phenyl
merC	0	0.692042	0.606061								BAC0664	O66048	Pseudomonas stutzeri	Plasmid pPB	Mercury (Hg)
merE	0	3.80623	0								BAC0670	Q52104	Serratia marcescens	Plasmid pDU1358 (Serratia marcescens)	Mercury (Hg)
merE	0	0.346021	0								BAC0673	P06690	Pseudomonas aeruginosa	Plasmid pVS1	Mercury (Hg)
merR	0	3.80623	0								BAC0686	P13111	Serratia marcescens	Plasmid pDU1358 (Serratia marcescens)	Mercury (Hg)
merR	0	2.07612	0.606061								BAC0689	Q934S8	Thiobacillus ferrooxidans	Chromosome, Transposon Tn5037	Mercury (Hg)
merR2	0	0.346021	0								BAC0684	Q7DKL2	Pseudomonas sp. K-62	Plasmid pMR26Â (Pseudomonas sp. K-62)	Mercury (Hg)
merT	0	3.80623	0								BAC0695	P13112	Serratia marcescens	Plasmid pDU1358 (Serratia marcescens)	Mercury (Hg)
merT	0	2.07612	0.606061								BAC0233	P94185	Alcaligenes sp.	Plasmid IncHI2, pMER610 (Alcaligenes spp.)	Mercury (Hg)
oqxA	2.14067	9.68858	0								BAC0294	Q69HW3	Escherichia coli	Plasmid p0LA52 (E. coli), Plasmid pGDGK3 (Klebsiella pneumoniae)	Benzylkonium Chloride (BAC) [class: Quaternary Ammonium Compounds (QACs)], Clorine Dioxide (ClO2) [class: Halogens], Triclosan [class: Phenolic compounds], Cetrimide (CTM) [class: Quaternary Ammonium Compounds (QACs)], Chlorhexidine [class: Biguanides], Sodium Dodecyl Sulfate (SDS) [class: Organo-sulfate], Acriflavine [class: Acridine]				Acridine				Biguanides									Organo-sulfate						Phenolic compounds		Quaternary Ammonium Compounds (QACs)
oqxB	1.83486	9.34256	0								BAC0295	Q69HW2	Escherichia coli	Plasmid pOLA52 (E. coli),	Benzylkonium Chloride (BAC) [class: Quaternary Ammonium Compounds (QACs)], Clorine Dioxide (ClO2) [class: Halogens], Triclosan [class: Phenolic compounds], Cetrimide (CTM) [class: Quaternary Ammonium Compounds (QACs)], Chlorhexidine [class: Biguanides], Sodium Dodecyl Sulfate (SDS) [class: Organo-sulfate], Acriflavine [class: Acridine]				Acridine				Biguanides									Organo-sulfate						Phenolic compounds		Quaternary Ammonium Compounds (QACs)
pbrA	0	0.346021	0								BAC0298	Q58AJ6	Ralstonia metallidurans (strain CH34/ATCC 43123/DSM 2839)	Plasmid pMOL30 (Ralstonia metallidurans (strain CH34/ATCC 43123/DSM 2839), Plasmid pLVPK (Klebsiella pneumoniae)	Lead (Pb)
qacF	0.917431	12.8028	0								BAC0324	Q9X2N9	Only gram -ve, E. aerogenes, E. cloacae	Plasmid pIP833 (E. aerogenes)	Cetrimide (CTM) [class: Quaternary Ammonium Compounds (QACs)]																									Quaternary Ammonium Compounds (QACs)
ybtP	0	1.38408	0								BAC0432	Q9R7V3	Yersinia pestis	Chromosome	Iron (Fe)
ybtQ	0	1.38408	0								BAC0433	Q9Z375	Yersinia pestis	Chromosome	Iron (Fe)
