# Supplementary material for: Global population genomics of Salmonella enterica serotype Napoli, an emerging pathogen with an unusual epidemiologic pattern
Source: Research Square preprint supplement (doi:10.21203/rs.3.rs-8608855/v1), 2026-01-16
Supplement: Supplementary file 2 [file 24f33807b5677963a7406b6f.xlsx]

## Sheet: Data 2
Strain name	Alternative_Name	Serovar	Antigenic Formula	Clade	HC900_lineage	Sequencing platform	GenBank Accession No.	NCBI Project ID	Molecule	Plasmid compatibility group	Length (bp)	DnaA gene location (bp)	No. circular replicons
Nap72-2	72-2	Napoli	9,12:l,z13:e,n,x	N2	HC900_1543a HC200_27729	PacBio	CP163475	PRJNA1052634	chromosome	-	4828561	1..1401	1
Nap72-2	72-2	Napoli	9,12:l,z13:e,n,x	N2	HC900_1543a HC200_27729	PacBio	CP163476	PRJNA1052634	plasmid	-	99456	-	1
ISS_133/3/03	Nap_ISS_133-3-03	Napoli	9,12:l,z13:e,n,x	N1	HC900_107120	ONT	CP163477	PRJNA1052634	chromosome	-	4701935	1..1401	1
ISS_133/3/03	Nap_ISS_133-3-03	Napoli	9,12:l,z13:e,n,x	N1	HC900_107120	ONT	CP163478	PRJNA1052634	plasmid	IncI2(Delta)	61452	-	1
ISS_133/3/03	Nap_ISS_133-3-03	Napoli	9,12:l,z13:e,n,x	N1	HC900_107120	ONT	CP163479	PRJNA1052634	plasmid	-	39097	-	1
ISS_61/2/17	Nap_ISS_61-2-17	Napoli	9,12:l,z13:e,n,x	N2	HC900_94666	ONT	CP163480	PRJNA1052634	chromosome	-	4692995	1..1401	1
ISS_61/2/17	Nap_ISS_61-2-17	Napoli	9,12:l,z13:e,n,x	N2	HC900_94666	ONT	CP163481	PRJNA1052634	plasmid	IncI1-I(Alpha)	83907	-	1
ISS_61/4/17	Nap_ISS_61-4-17	Napoli	9,12:l,z13:e,n,x	N1	HC900_94001	ONT	CP163482	PRJNA1052634	chromosome	-	4746911	1..1401	1
20154936	Nap_S20154936	Napoli	9,12:l,z13:e,n,x	N2	HC900_1543c	ONT	CP163483	PRJNA1052634	chromosome	-	4743209	1..1401	1
Nap90-23	90-23	Napoli	9,12:l,z13:e,n,x	N2	HC900_1543a HC400_140575	ONT	CP163484	PRJNA1052634	chromosome	-	4763853	1..1401	1
Nap90-23	90-23	Napoli	9,12:l,z13:e,n,x	N2	HC900_1543a HC400_140575	ONT	CP163485	PRJNA1052634	plasmid	IncFII(S)	98702	-	1
202208589	Nap202208589	Napoli	9,12:l,z13:e,n,x	N1	HC900_63054	ONT	CP163486	PRJNA1052634	chromosome	-	4832028	1..1401	1
202208589	Nap202208589	Napoli	9,12:l,z13:e,n,x	N1	HC900_63054	ONT	CP163487	PRJNA1052634	plasmid	IncFII	42941	-	1
ISS_88/1/03	ISS_88-1-03	Napoli	9,12:l,z13:e,n,x	N2	HC900_1543ab	ONT	CP163488	PRJNA1052634	chromosome	-	4777208	1..1401	1
ISS_85/16/14	Nap85-16-14	Napoli	9,12:l,z13:e,n,x	N1	HC900_107023	ONT	CP163489	PRJNA1052634	chromosome	-	4626219	1..1401	1
ISS_85/16/14	Nap85-16-14	Napoli	9,12:l,z13:e,n,x	N1	HC900_107023	ONT	CP163490	PRJNA1052634	plasmid	IncI1-I(Alpha)	89488	-	1
ISS_67/2/09	ISS_67-2-09	Napoli	9,12:l,z13:e,n,x	N2	HC900_20879	ONT	CP163491	PRJNA1052634	chromosome	-	4804844	1..1401	1
ISS_82/7/10	Nap82-7-10	Napoli	9,12:l,z13:e,n,x	N1	HC900_7673	ONT	CP163492	PRJNA1052634	chromosome	-	4843701	1..1401	1
ISS_75/4/18	ISS_75_4_18	Napoli	9,12:l,z13:e,n,x	N2	HC900_1543b	ONT	CP163493	PRJNA1052634	chromosome	-	4770884	1..1401	1
ISS_75/4/18	ISS_75_4_18	Napoli	9,12:l,z13:e,n,x	N2	HC900_1543b	ONT	CP163494	PRJNA1052634	plasmid	IncFII(S)	72581	-	1
ISS_75/4/18	ISS_75_4_18	Napoli	9,12:l,z13:e,n,x	N2	HC900_1543b	ONT	CP163495	PRJNA1052634	plasmid	-	47083	-	1
164K	WS1770	Veneziana	11:i:e,n,x	-	HC900_12926	ONT	CP163496	PRJNA1052634	chromosome	-	4674412	1..1401	1
