# Supplementary material for: Global population genomics of Salmonella enterica serotype Napoli, an emerging pathogen with an unusual epidemiologic pattern
Source: Research Square preprint supplement (doi:10.21203/rs.3.rs-8608855/v1), 2026-01-16
Supplement: Supplementary file 4 [file 4492a7595ed60f673cb19d7b.xlsx]

## Sheet: Data 6
Order in the Panaroo's output (Pan-genome)	Gene (Pan-genome)	Non unique gene name (Pan-genome)	Annotation (Pan-genome)	EGGNog analysis (hit)	COG category	Description (EGGNog )	Preferred name	GOs	query = Gene (Pan-genome)	seed ortholog	evalue	score	eggNOG OGs	max_annot lvl
g1	yajL	yajL	protein deglycase YajL	hit	S	DJ-1/PfpI family	thiJ	GO:0003674,GO:0003824,GO:0005575,GO:0005622,GO:0005623,GO:0005737,GO:0005829,GO:0006457,GO:0006464,GO:0006517,GO:0006807,GO:0006950,GO:0006979,GO:0008150,GO:0008152,GO:0009100,GO:0009266,GO:0009408,GO:0009628,GO:0009987,GO:0016829,GO:0016835,GO:0016836,GO:0019538,GO:0022613,GO:0030091,GO:0033554,GO:0034599,GO:0036211,GO:0036524,GO:0036525,GO:0042026,GO:0042221,GO:0042254,GO:0043170,GO:0043412,GO:…	yajL	220341.16501701	9.2e-136	384.0	COG0693@1|root,COG0693@2|Bacteria,1N7T2@1224|Proteobacteria,1RSBI@1236|Gammaproteobacteria,3ZIVW@590|Salmonella	1236|Gammaproteobacteria
g2	trkH	;trkH	Trk system potassium uptake protein TrkH;Trk system potassium uptake protein;Trk system potassium transporter TrkH	hit	P	Low-affinity potassium transport system. Interacts with Trk system potassium uptake protein TrkA	trkH	GO:0003674,GO:0005215,GO:0005216,GO:0005261,GO:0005267,GO:0005488,GO:0005515,GO:0005575,GO:0005623,GO:0005886,GO:0005887,GO:0006810,GO:0006811,GO:0006812,GO:0006813,GO:0008150,GO:0008324,GO:0009987,GO:0015075,GO:0015077,GO:0015079,GO:0015267,GO:0015318,GO:0015672,GO:0016020,GO:0016021,GO:0022803,GO:0022838,GO:0022857,GO:0022890,GO:0030001,GO:0030955,GO:0031224,GO:0031226,GO:0031420,GO:0034220,GO:…	trkH	90371.CY43_20850	0.0	949.0	COG0168@1|root,COG0168@2|Bacteria,1MUIJ@1224|Proteobacteria,1RMN6@1236|Gammaproteobacteria,3ZJ0E@590|Salmonella	1236|Gammaproteobacteria
g3	fliT	fliT	flagella biosynthesis regulatory protein FliT	hit	N	it directly binds FlhC, thus inhibiting the binding of the FlhC FlhD complex to class 2 promoters, resulting in decreased expression of class 2 flagellar operons. As a chaperone, effects FliD transition to the membrane by preventing its premature polymerization, and by directing it to the export apparatus	fliT	-	fliT	220341.16503203	2.45e-77	231.0	2DNJM@1|root,32XUH@2|Bacteria,1N4UB@1224|Proteobacteria,1S9V8@1236|Gammaproteobacteria,3ZMB0@590|Salmonella	1236|Gammaproteobacteria
g4	panD	panD	aspartate 1-decarboxylase	hit	H	Catalyzes the pyruvoyl-dependent decarboxylation of aspartate to produce beta-alanine	panD	GO:0005575,GO:0005622,GO:0005623,GO:0005737,GO:0005829,GO:0006508,GO:0006807,GO:0008150,GO:0008152,GO:0010467,GO:0016485,GO:0016540,GO:0019538,GO:0043170,GO:0044238,GO:0044424,GO:0044444,GO:0044464,GO:0051604,GO:0071704,GO:1901564	panD	220341.16501462	5.49e-85	250.0	COG0853@1|root,COG0853@2|Bacteria,1RI1B@1224|Proteobacteria,1S66E@1236|Gammaproteobacteria,3ZM5E@590|Salmonella	1236|Gammaproteobacteria
g5	group_6454	ridA	2-iminobutanoate/2-iminopropanoate deaminase	hit	J	Endoribonuclease L-PSP	yjgF	GO:0003674,GO:0003824,GO:0005488,GO:0005515,GO:0005575,GO:0005622,GO:0005623,GO:0005737,GO:0005829,GO:0008150,GO:0009636,GO:0016787,GO:0019239,GO:0042221,GO:0042802,GO:0044424,GO:0044444,GO:0044464,GO:0050896,GO:0051082	group_6454	220341.16505567	2.49e-82	244.0	COG0251@1|root,COG0251@2|Bacteria,1MZ3J@1224|Proteobacteria,1S5XS@1236|Gammaproteobacteria,3ZM99@590|Salmonella	1236|Gammaproteobacteria
g6	group_6429		hypothetical protein	no-hit
g7	yohO	yohO	protein YohO	no-hit
g8	group_6416		YshB family small membrane protein	hit	-	-	-	-	group_6416	1218086.BBNB01000017_gene1729	5.1e-14	64.7	2C785@1|root,2ZG52@2|Bacteria,1P8DX@1224|Proteobacteria,1SVWN@1236|Gammaproteobacteria,3WYZU@544|Citrobacter	1236|Gammaproteobacteria
g9	group_6411		DUF2770 domain-containing protein	hit	S	Protein of unknown function (DUF2770)	-	GO:0008150,GO:0009268,GO:0009628,GO:0010447,GO:0050896	group_6411	220341.16502329	5.61e-16	69.7	2EH0X@1|root,33ASZ@2|Bacteria,1NJ0F@1224|Proteobacteria,1SI2Z@1236|Gammaproteobacteria	1236|Gammaproteobacteria
g10	rpmJ	rpmJ	50S ribosomal protein L36	hit	J	Belongs to the bacterial ribosomal protein bL36 family	rpmJ	GO:0003674,GO:0003735,GO:0005198,GO:0005575,GO:0005622,GO:0005623,GO:0005737,GO:0005829,GO:0005840,GO:0006412,GO:0006518,GO:0006807,GO:0008150,GO:0008152,GO:0009058,GO:0009059,GO:0009987,GO:0010467,GO:0015934,GO:0019538,GO:0022625,GO:0022626,GO:0032991,GO:0034641,GO:0034645,GO:0043043,GO:0043170,GO:0043226,GO:0043228,GO:0043229,GO:0043232,GO:0043603,GO:0043604,GO:0044237,GO:0044238,GO:0044249,GO:…	rpmJ	1005994.GTGU_03003	3.7e-19	77.8	COG0257@1|root,COG0257@2|Bacteria,1NGEI@1224|Proteobacteria,1SGC9@1236|Gammaproteobacteria	1236|Gammaproteobacteria
g11	mntS	mntS	manganase accumulation protein MntS	hit	-	-	-	GO:0006873,GO:0006875,GO:0008150,GO:0009987,GO:0010035,GO:0010038,GO:0010042,GO:0019725,GO:0030003,GO:0030026,GO:0042221,GO:0042592,GO:0046916,GO:0048878,GO:0050801,GO:0050896,GO:0051716,GO:0055065,GO:0055071,GO:0055076,GO:0055080,GO:0055082,GO:0065007,GO:0065008,GO:0070887,GO:0071241,GO:0071248,GO:0071287,GO:0098771	mntS	1114922.CIFAM_07_01290	2.95e-22	85.9	2EH7F@1|root,33AZ9@2|Bacteria,1NJQ0@1224|Proteobacteria,1SGFP@1236|Gammaproteobacteria,3WYYK@544|Citrobacter	1236|Gammaproteobacteria
g12	group_6378		DUF2474 domain-containing protein	no-hit
g13	ykgO	ykgO	type B 50S ribosomal protein L36	hit	J	Ribosomal protein L36	rpmJ	GO:0003674,GO:0003735,GO:0005198,GO:0005575,GO:0005622,GO:0005623,GO:0005737,GO:0005829,GO:0005840,GO:0006412,GO:0006518,GO:0006807,GO:0008150,GO:0008152,GO:0009058,GO:0009059,GO:0009987,GO:0010467,GO:0015934,GO:0019538,GO:0022625,GO:0022626,GO:0032991,GO:0034641,GO:0034645,GO:0043043,GO:0043170,GO:0043226,GO:0043228,GO:0043229,GO:0043232,GO:0043603,GO:0043604,GO:0044237,GO:0044238,GO:0044249,GO:…	ykgO	1197719.A464_423	1.67e-25	94.4	COG0257@1|root,COG0257@2|Bacteria,1NGBJ@1224|Proteobacteria,1SCR7@1236|Gammaproteobacteria,3ZMQ2@590|Salmonella	1236|Gammaproteobacteria
g14	lipB	lipB	lipoyl(octanoyl) transferase LipB	hit	H	Catalyzes the transfer of endogenously produced octanoic acid from octanoyl-acyl-carrier-protein onto the lipoyl domains of lipoate-dependent enzymes. Lipoyl-ACP can also act as a substrate although octanoyl-ACP is likely to be the physiological substrate	lipB	GO:0003674,GO:0003824,GO:0006082,GO:0006464,GO:0006629,GO:0006631,GO:0006633,GO:0006732,GO:0006790,GO:0006807,GO:0008150,GO:0008152,GO:0008610,GO:0009058,GO:0009106,GO:0009107,GO:0009108,GO:0009249,GO:0009892,GO:0009987,GO:0010467,GO:0010468,GO:0010605,GO:0010629,GO:0016053,GO:0016415,GO:0016740,GO:0016746,GO:0016747,GO:0016772,GO:0016779,GO:0016874,GO:0016879,GO:0016979,GO:0018065,GO:0018130,GO:…	lipB	90371.CY43_03460	1.2e-153	431.0	COG0321@1|root,COG0321@2|Bacteria,1MU6A@1224|Proteobacteria,1RMXQ@1236|Gammaproteobacteria,3ZKF9@590|Salmonella	1236|Gammaproteobacteria
g15	yqaE	yqaE	YqaE/Pmp3 family membrane protein	hit	S	Proteolipid membrane potential modulator	yqaE	GO:0008150,GO:0042221,GO:0046677,GO:0050896	yqaE	1197719.A464_2818	3.91e-31	108.0	COG0401@1|root,COG0401@2|Bacteria,1N7K3@1224|Proteobacteria,1SCD8@1236|Gammaproteobacteria,3ZNDS@590|Salmonella	1236|Gammaproteobacteria
g16	ytjA	ytjA		hit	S	Protein of unknown function (DUF1328)	ytjA	-	ytjA	1197719.A464_4609	1.31e-25	95.1	COG5487@1|root,COG5487@2|Bacteria,1PCVV@1224|Proteobacteria,1T6EA@1236|Gammaproteobacteria,3ZMPD@590|Salmonella	1236|Gammaproteobacteria
g17	group_6290		Pirin	hit	-	-	-	-	group_6290	220341.16504312	4.72e-24	91.3	2EMRY@1|root,33FED@2|Bacteria,1NIFB@1224|Proteobacteria,1SIA7@1236|Gammaproteobacteria,3ZNEP@590|Salmonella	1236|Gammaproteobacteria
g18	group_6289		Transposase	hit	S	Transposase	-	-	group_6289	220341.16505566	2.06e-28	105.0	2BBYF@1|root,325GZ@2|Bacteria,1RM07@1224|Proteobacteria,1S8NX@1236|Gammaproteobacteria,3ZMYG@590|Salmonella	1236|Gammaproteobacteria
g19	rsmS	rsmS	pleiotropic regulatory protein RsmS	hit	S	Protein of unknown function (DUF2496)	ybaM	GO:0006950,GO:0008150,GO:0009987,GO:0033554,GO:0036460,GO:0050896,GO:0051716	rsmS	220341.16501752	2.68e-28	102.0	2EHYU@1|root,33BQB@2|Bacteria,1NGAT@1224|Proteobacteria,1SGE4@1236|Gammaproteobacteria,3ZMPN@590|Salmonella	1236|Gammaproteobacteria
g20	rpmG	rpmG	50S ribosomal protein L33	hit	J	there are paralogous genes in several bacterial genomes, and a CXXC motif for zinc binding and an upstream regulation region of the paralog lacking this motif that are regulated by zinc	rpmG	GO:0000027,GO:0003674,GO:0003735,GO:0005198,GO:0005575,GO:0005622,GO:0005623,GO:0005737,GO:0005829,GO:0005840,GO:0006412,GO:0006518,GO:0006807,GO:0006996,GO:0008150,GO:0008152,GO:0009058,GO:0009059,GO:0009987,GO:0010467,GO:0015934,GO:0016043,GO:0019538,GO:0022607,GO:0022613,GO:0022618,GO:0022625,GO:0022626,GO:0032991,GO:0034622,GO:0034641,GO:0034645,GO:0042221,GO:0042254,GO:0042255,GO:0042273,GO:…	rpmG	1076550.LH22_02755	9.66e-31	108.0	COG0267@1|root,COG0267@2|Bacteria,1N6QV@1224|Proteobacteria,1SCEJ@1236|Gammaproteobacteria,3W1AP@53335|Pantoea	1236|Gammaproteobacteria
g21	rpmF	rpmF	50S ribosomal protein L32	hit	J	Ribosomal L32p protein family	rpmF	GO:0000027,GO:0000302,GO:0003674,GO:0003735,GO:0005198,GO:0005575,GO:0005622,GO:0005623,GO:0005737,GO:0005829,GO:0005840,GO:0006412,GO:0006518,GO:0006807,GO:0006950,GO:0006979,GO:0006996,GO:0008150,GO:0008152,GO:0009058,GO:0009059,GO:0009314,GO:0009628,GO:0009987,GO:0010467,GO:0015934,GO:0016043,GO:0019538,GO:0022607,GO:0022613,GO:0022618,GO:0022625,GO:0022626,GO:0032991,GO:0034622,GO:0034641,GO:…	rpmF	1114922.CIFAM_06_03660	1.39e-33	115.0	COG0333@1|root,COG0333@2|Bacteria,1N6RF@1224|Proteobacteria,1SC9G@1236|Gammaproteobacteria,3WYWW@544|Citrobacter	1236|Gammaproteobacteria
g22	group_6254		entericidin A	hit	S	Entericidin	-	-	group_6254	90371.CY43_22610	5.87e-22	85.9	COG5510@1|root,COG5510@2|Bacteria,1NGDA@1224|Proteobacteria,1RTJ4@1236|Gammaproteobacteria,3ZMQG@590|Salmonella	1236|Gammaproteobacteria
g23	gns	gns	Protein gns	hit	S	GnsA/GnsB toxin of bacterial toxin-antitoxin system	gnsA	GO:0003674,GO:0005488,GO:0005515,GO:0005575,GO:0005622,GO:0005623,GO:0005737,GO:0005829,GO:0042802,GO:0044424,GO:0044444,GO:0044464	gns	220341.16502996	3.18e-30	107.0	2BVP3@1|root,332DR@2|Bacteria,1NEUJ@1224|Proteobacteria,1SFD3@1236|Gammaproteobacteria,3ZMNT@590|Salmonella	1236|Gammaproteobacteria
g24	rpmD	rpmD	50S ribosomal protein L30	hit	J	Ribosomal protein L30	rpmD	GO:0000027,GO:0003674,GO:0003735,GO:0005198,GO:0005575,GO:0005622,GO:0005623,GO:0005737,GO:0005829,GO:0005840,GO:0006412,GO:0006518,GO:0006807,GO:0006996,GO:0008150,GO:0008152,GO:0009058,GO:0009059,GO:0009987,GO:0010467,GO:0015934,GO:0016043,GO:0019538,GO:0022607,GO:0022613,GO:0022618,GO:0022625,GO:0022626,GO:0032991,GO:0034622,GO:0034641,GO:0034645,GO:0042254,GO:0042255,GO:0042273,GO:0043043,GO:…	rpmD	1005994.GTGU_03006	1.12e-33	115.0	COG1841@1|root,COG1841@2|Bacteria,1N6ZE@1224|Proteobacteria,1SC8N@1236|Gammaproteobacteria	1236|Gammaproteobacteria
g25	group_6224		hypothetical protein	no-hit
g26	yoaH	yoaH	YoaH family protein	hit	S	Uncharacterised protein family (UPF0181)	yoaH	-	yoaH	220341.16503010	4.57e-33	114.0	COG3140@1|root,COG3140@2|Bacteria,1N89H@1224|Proteobacteria,1SCHP@1236|Gammaproteobacteria,3ZMPF@590|Salmonella	1236|Gammaproteobacteria
g27	yciZ	yciZ	UPF0509 protein YciZ	hit	S	Belongs to the UPF0509 family	yciZ	-	yciZ	90371.CY43_08700	2.75e-34	117.0	2E3CA@1|root,32YBK@2|Bacteria,1ND39@1224|Proteobacteria,1SCW0@1236|Gammaproteobacteria,3ZMQ4@590|Salmonella	1236|Gammaproteobacteria
g28	group_6209		stress-induced acidophilic repeat motif-containing protein	hit	S	Stress-induced bacterial acidophilic repeat motif	-	-	group_6209	1197719.A464_1824	5.59e-12	61.2	COG3729@1|root,COG3729@2|Bacteria,1N767@1224|Proteobacteria,1SCA5@1236|Gammaproteobacteria,3ZMNS@590|Salmonella	1236|Gammaproteobacteria
g29	yodC	yodC	DUF2158 domain-containing protein	hit	S	Uncharacterized small protein (DUF2158)	yodC	-	yodC	220341.16503228	2.91e-38	128.0	COG5475@1|root,COG5475@2|Bacteria,1N81T@1224|Proteobacteria,1SD0R@1236|Gammaproteobacteria,3ZMMR@590|Salmonella	1236|Gammaproteobacteria
g30	csrA	csrA	carbon storage regulator CsrA	hit	J	Could accelerate the degradation of some genes transcripts potentially through selective RNA binding	csrA	GO:0003674,GO:0003676,GO:0003723,GO:0003729,GO:0005488,GO:0005575,GO:0005622,GO:0005623,GO:0005737,GO:0005829,GO:0005979,GO:0006109,GO:0006139,GO:0006417,GO:0006446,GO:0006725,GO:0006807,GO:0008150,GO:0008152,GO:0009889,GO:0009890,GO:0009892,GO:0009987,GO:0010468,GO:0010556,GO:0010558,GO:0010605,GO:0010608,GO:0010629,GO:0010675,GO:0010677,GO:0010906,GO:0010962,GO:0016070,GO:0016071,GO:0017148,GO:…	csrA	1005994.GTGU_02525	7.45e-33	114.0	COG1551@1|root,COG1551@2|Bacteria,1N6PG@1224|Proteobacteria,1SCB4@1236|Gammaproteobacteria	1236|Gammaproteobacteria
g31	group_6167		Domain of unknown function	hit	S	Domain of unknown function	ydiH	-	group_6167	90371.CY43_06955	1.73e-36	123.0	2E58W@1|root,3301A@2|Bacteria,1N8X4@1224|Proteobacteria,1SCDQ@1236|Gammaproteobacteria,3ZMMY@590|Salmonella	1236|Gammaproteobacteria
g32	rpmC	rpmC	50S ribosomal protein L29	hit	J	Ribosomal L29 protein	rpmC	GO:0000027,GO:0003674,GO:0003735,GO:0005198,GO:0005575,GO:0005622,GO:0005623,GO:0005737,GO:0005829,GO:0005840,GO:0006412,GO:0006518,GO:0006807,GO:0006996,GO:0008150,GO:0008152,GO:0009058,GO:0009059,GO:0009987,GO:0010467,GO:0015934,GO:0016043,GO:0019538,GO:0022607,GO:0022613,GO:0022618,GO:0022625,GO:0022626,GO:0032991,GO:0034622,GO:0034641,GO:0034645,GO:0042254,GO:0042255,GO:0042273,GO:0043043,GO:…	rpmC	1080067.BAZH01000032_gene2674	2.45e-32	112.0	COG0255@1|root,COG0255@2|Bacteria,1N6PR@1224|Proteobacteria,1SCBN@1236|Gammaproteobacteria,3WYUC@544|Citrobacter	1236|Gammaproteobacteria
g33	bcsF	bcsF	cellulose biosynthesis protein BcsF	hit	S	Cellulose biosynthesis protein BcsF	bcsF	-	bcsF	220341.16504986	2.17e-35	120.0	2E541@1|root,32ZX1@2|Bacteria,1N7UP@1224|Proteobacteria,1SDDF@1236|Gammaproteobacteria,3ZMME@590|Salmonella	1236|Gammaproteobacteria
g34	group_6145		hypothetical protein	no-hit
g35	yaiA	yaiA	Uncharacterized protein YaiA	hit	S	YaiA protein	yaiA	-	yaiA	220341.16501658	1.99e-40	133.0	2E4SC@1|root,32ZKT@2|Bacteria,1NA4W@1224|Proteobacteria,1SE9W@1236|Gammaproteobacteria,3ZMIW@590|Salmonella	1236|Gammaproteobacteria
g36	yacG	yacG	DNA gyrase inhibitor YacG	hit	S	Inhibits all the catalytic activities of DNA gyrase by preventing its interaction with DNA. Acts by binding directly to the C-terminal domain of GyrB, which probably disrupts DNA binding by the gyrase	yacG	GO:0003674,GO:0004857,GO:0005488,GO:0008150,GO:0008270,GO:0008657,GO:0010911,GO:0030234,GO:0032780,GO:0042030,GO:0043086,GO:0043167,GO:0043169,GO:0043462,GO:0044092,GO:0046872,GO:0046914,GO:0050790,GO:0051336,GO:0051346,GO:0060589,GO:0060590,GO:0065007,GO:0065009,GO:0072586,GO:0098772,GO:2000371,GO:2000372	yacG	220341.16501425	1.19e-41	136.0	COG3024@1|root,COG3024@2|Bacteria,1NGJ8@1224|Proteobacteria,1SC7M@1236|Gammaproteobacteria,3ZMIT@590|Salmonella	1236|Gammaproteobacteria
g37	bfd	bfd	bacterioferritin-associated ferredoxin	hit	P	BFD-like [2Fe-2S] binding domain	bfd	GO:0003674,GO:0005488,GO:0048037,GO:0051536,GO:0051537,GO:0051540	bfd	220341.16505145	1.28e-41	136.0	COG2906@1|root,COG2906@2|Bacteria,1N86H@1224|Proteobacteria,1SCIU@1236|Gammaproteobacteria,3ZMIP@590|Salmonella	1236|Gammaproteobacteria
g38	dsrB	dsrB	protein DsrB	hit	S	Dextransucrase DSRB	dsrB	-	dsrB	1197719.A464_2131	5.36e-41	134.0	2E52Z@1|root,32ZW5@2|Bacteria,1N7NE@1224|Proteobacteria,1SD23@1236|Gammaproteobacteria,3ZMMG@590|Salmonella	1236|Gammaproteobacteria
g39	group_6121		hypothetical protein	no-hit
g40	group_6101		hypothetical protein	hit	-	-	-	-	group_6101	220341.16504735	4.02e-38	127.0	2B0SX@1|root,31T5A@2|Bacteria,1QQUS@1224|Proteobacteria,1RTIP@1236|Gammaproteobacteria,3ZMIX@590|Salmonella	1236|Gammaproteobacteria
g41	group_6100		50S ribosomal protein L35	hit	J	Belongs to the bacterial ribosomal protein bL35 family	rpmI	GO:0003674,GO:0003735,GO:0005198,GO:0005575,GO:0005622,GO:0005623,GO:0005737,GO:0005829,GO:0005840,GO:0015934,GO:0022625,GO:0022626,GO:0032991,GO:0043226,GO:0043228,GO:0043229,GO:0043232,GO:0044391,GO:0044422,GO:0044424,GO:0044444,GO:0044445,GO:0044446,GO:0044464,GO:1990904	group_6100	1005994.GTGU_00408	2.68e-39	130.0	COG0291@1|root,COG0291@2|Bacteria,1N6V4@1224|Proteobacteria,1SCHI@1236|Gammaproteobacteria	1236|Gammaproteobacteria
g42	group_6098	ybdD	DUF466 domain-containing protein	hit	S	Selenoprotein, putative	ybdD	-	group_6098	220341.16501852	2.45e-44	143.0	COG2879@1|root,COG2879@2|Bacteria,1N6TY@1224|Proteobacteria,1S8ZU@1236|Gammaproteobacteria,3ZMKW@590|Salmonella	1236|Gammaproteobacteria
g43	yjeT	yjeT	DUF2065 domain-containing protein	hit	S	Uncharacterized protein conserved in bacteria (DUF2065)	yjeT	-	yjeT	220341.16505492	2.21e-38	128.0	COG3242@1|root,COG3242@2|Bacteria,1N6V7@1224|Proteobacteria,1SCHT@1236|Gammaproteobacteria,3ZMJI@590|Salmonella	1236|Gammaproteobacteria
g44	group_6082	kefB	glutathione-regulated potassium-efflux system protein KefB	hit	S	Probable metal-binding protein (DUF2387)	yheV	-	group_6082	220341.16505133	3.73e-44	142.0	COG3529@1|root,COG3529@2|Bacteria,1N6RJ@1224|Proteobacteria,1SC9Y@1236|Gammaproteobacteria,3ZMJC@590|Salmonella	1236|Gammaproteobacteria
g45	iscX	iscX	Fe-S cluster assembly protein IscX	hit	S	Iron-sulphur cluster assembly	iscX	GO:0003674,GO:0004857,GO:0005488,GO:0005506,GO:0005575,GO:0005622,GO:0005623,GO:0005737,GO:0005829,GO:0006790,GO:0008150,GO:0008152,GO:0008198,GO:0009987,GO:0016043,GO:0016226,GO:0022607,GO:0030234,GO:0031163,GO:0043086,GO:0043167,GO:0043169,GO:0044085,GO:0044092,GO:0044237,GO:0044424,GO:0044444,GO:0044464,GO:0046872,GO:0046914,GO:0050790,GO:0051186,GO:0065007,GO:0065009,GO:0071840,GO:0098772	iscX	220341.16503751	2.63e-44	143.0	COG2975@1|root,COG2975@2|Bacteria,1N7C1@1224|Proteobacteria,1SC9F@1236|Gammaproteobacteria,3ZMJW@590|Salmonella	1236|Gammaproteobacteria
g46	ypfN	ypfN	UPF0370 protein Ent638_2968	hit	S	Uncharacterised protein family (UPF0370)	ypfN	-	ypfN	1197719.A464_2597	1.78e-42	138.0	2C6G7@1|root,32YJI@2|Bacteria,1N76H@1224|Proteobacteria,1SCQS@1236|Gammaproteobacteria,3ZMJ8@590|Salmonella	1236|Gammaproteobacteria
g47	group_6060	ydfZ	selenoprotein YdfZ	hit	S	YdfZ protein	ydfZ	-	group_6060	1197719.A464_1529	3.19e-41	135.0	2C4ZZ@1|root,3320I@2|Bacteria,1N7QH@1224|Proteobacteria,1SCDY@1236|Gammaproteobacteria,3ZMM9@590|Salmonella	1236|Gammaproteobacteria
g48	aaeX	aaeX	p-hydroxybenzoic acid efflux pump operon protein AaeX	hit	S	Protein of unknown function (DUF1656)	aaeX	-	aaeX	220341.16504428	9.15e-41	134.0	2DNQE@1|root,32YJX@2|Bacteria,1N7N9@1224|Proteobacteria,1SCX3@1236|Gammaproteobacteria,3ZMK7@590|Salmonella	1236|Gammaproteobacteria
g49	ybdD	ybdD	DUF466 domain-containing protein	hit	S	Selenoprotein, putative	yjiX	GO:0006950,GO:0006974,GO:0008150,GO:0009987,GO:0033554,GO:0050896,GO:0051716	ybdD	220341.16505646	2.92e-46	148.0	COG2879@1|root,COG2879@2|Bacteria,1N6TY@1224|Proteobacteria,1S8VA@1236|Gammaproteobacteria,3ZMMI@590|Salmonella	1236|Gammaproteobacteria
g50	bcsR	bcsR	cellulose biosynthesis protein BcsR	hit	S	Cellulose biosynthesis protein BcsR	yhjR	-	bcsR	220341.16504988	4.69e-43	140.0	2CH4T@1|root,330BI@2|Bacteria,1N81F@1224|Proteobacteria,1SD3T@1236|Gammaproteobacteria,3ZMJQ@590|Salmonella	1236|Gammaproteobacteria
g51	yifL	yifL	Uncharacterized lipoprotein YifL	hit	M	Prokaryotic lipoprotein-attachment site	yifL	-	yifL	220341.16504492	7.81e-42	137.0	COG5567@1|root,COG5567@2|Bacteria,1N70H@1224|Proteobacteria,1SDC8@1236|Gammaproteobacteria,3ZMMT@590|Salmonella	1236|Gammaproteobacteria
g52	tatE	tatE	twin-arginine translocase subunit TatE	hit	U	Part of the twin-arginine translocation (Tat) system that transports large folded proteins containing a characteristic twin-arginine motif in their signal peptide across membranes. TatE shares overlapping functions with TatA	tatE	-	tatE	220341.16501883	3.47e-36	122.0	COG1826@1|root,COG1826@2|Bacteria,1N7JK@1224|Proteobacteria,1SCGF@1236|Gammaproteobacteria,3ZMJK@590|Salmonella	1236|Gammaproteobacteria
g53	group_6041		hypothetical protein	hit	G	PTS system fructose IIA component	-	-	group_6041	90371.CY43_03170	3.83e-23	92.4	COG2893@1|root,COG2893@2|Bacteria,1RD9I@1224|Proteobacteria,1S3V6@1236|Gammaproteobacteria,3ZKGJ@590|Salmonella	1236|Gammaproteobacteria
g54	yibT	yibT	Uncharacterized protein YibT	hit	S	response to butan-1-ol	yibT	GO:0001101,GO:0008150,GO:0010033,GO:0042221,GO:0050896,GO:0097305,GO:1901422,GO:1901700	yibT	220341.16504926	1.44e-42	139.0	2E4DS@1|root,32Z93@2|Bacteria,1N93Z@1224|Proteobacteria,1SD4V@1236|Gammaproteobacteria,3ZMMB@590|Salmonella	1236|Gammaproteobacteria
g55	ytfK	ytfK	Uncharacterized protein YtfK	hit	S	Protein of unknown function (DUF1107)	ytfK	-	ytfK	1197719.A464_4414	3.42e-41	135.0	2CTIP@1|root,32STK@2|Bacteria,1MZ8V@1224|Proteobacteria,1S908@1236|Gammaproteobacteria,3ZMMU@590|Salmonella	1236|Gammaproteobacteria
g56	marB	marB	multiple antibiotic resistance protein MarB	hit	S	MarB protein	marB	GO:0005575,GO:0005623,GO:0030288,GO:0030313,GO:0031975,GO:0042597,GO:0044464	marB	220341.16502640	1.15e-42	139.0	2E68Q@1|root,330WV@2|Bacteria,1N7UE@1224|Proteobacteria,1SFHP@1236|Gammaproteobacteria,3ZMND@590|Salmonella	1236|Gammaproteobacteria
g57	cspE	cspE	transcription antiterminator/RNA stability regulator CspE	hit	K	Cold shock	cspE	GO:0001072,GO:0003674,GO:0003676,GO:0003677,GO:0003697,GO:0003723,GO:0003727,GO:0005488,GO:0005575,GO:0005622,GO:0005623,GO:0005737,GO:0005829,GO:0006355,GO:0008143,GO:0008150,GO:0009889,GO:0009890,GO:0009892,GO:0010468,GO:0010556,GO:0010558,GO:0010605,GO:0010629,GO:0019219,GO:0019222,GO:0031323,GO:0031324,GO:0031326,GO:0031327,GO:0031554,GO:0031564,GO:0043242,GO:0043244,GO:0044424,GO:0044444,GO:…	cspE	1005994.GTGU_03349	2.28e-44	143.0	COG1278@1|root,COG1278@2|Bacteria,1N6Q5@1224|Proteobacteria,1SCA7@1236|Gammaproteobacteria	1236|Gammaproteobacteria
g58	cspA	cspA	Major cold shock protein	hit	K	SMART Cold shock protein	cspA	GO:0001072,GO:0003674,GO:0003676,GO:0003677,GO:0003697,GO:0003723,GO:0003727,GO:0005488,GO:0005575,GO:0005622,GO:0005623,GO:0005737,GO:0005829,GO:0006139,GO:0006351,GO:0006355,GO:0006725,GO:0006807,GO:0006950,GO:0008150,GO:0008152,GO:0009058,GO:0009059,GO:0009266,GO:0009409,GO:0009628,GO:0009889,GO:0009890,GO:0009892,GO:0009987,GO:0010467,GO:0010468,GO:0010556,GO:0010558,GO:0010605,GO:0010629,GO:…	cspA	1028307.EAE_06080	1.03e-45	147.0	COG1278@1|root,COG1278@2|Bacteria,1N6Q5@1224|Proteobacteria,1SCA7@1236|Gammaproteobacteria,3X2PC@547|Enterobacter	1236|Gammaproteobacteria
g59	ybcJ	ybcJ	ribosome-associated protein YbcJ	hit	S	S4 domain	ybcJ	GO:0003674,GO:0003676,GO:0003723,GO:0005488,GO:0005575,GO:0005622,GO:0005623,GO:0005737,GO:0005829,GO:0006412,GO:0006518,GO:0006807,GO:0008150,GO:0008152,GO:0009058,GO:0009059,GO:0009987,GO:0010467,GO:0019538,GO:0034641,GO:0034645,GO:0043043,GO:0043170,GO:0043603,GO:0043604,GO:0044237,GO:0044238,GO:0044249,GO:0044260,GO:0044267,GO:0044271,GO:0044424,GO:0044444,GO:0044464,GO:0071704,GO:0097159,GO:…	ybcJ	220341.16501806	2.87e-43	140.0	COG2501@1|root,COG2501@2|Bacteria,1N7NW@1224|Proteobacteria,1SCJU@1236|Gammaproteobacteria,3ZMKE@590|Salmonella	1236|Gammaproteobacteria
g60	rpmE	rpmE	50S ribosomal protein L31	hit	J	Binds the 23S rRNA	rpmE	GO:0003674,GO:0003735,GO:0005198,GO:0005488,GO:0005575,GO:0005622,GO:0005623,GO:0005737,GO:0005829,GO:0005840,GO:0006412,GO:0006518,GO:0006807,GO:0008150,GO:0008152,GO:0008270,GO:0009058,GO:0009059,GO:0009987,GO:0010467,GO:0015934,GO:0019538,GO:0022625,GO:0022626,GO:0032991,GO:0034641,GO:0034645,GO:0043043,GO:0043167,GO:0043169,GO:0043170,GO:0043226,GO:0043228,GO:0043229,GO:0043232,GO:0043603,GO:…	rpmE	1197719.A464_4125	2.24e-49	156.0	COG0254@1|root,COG0254@2|Bacteria,1MZ69@1224|Proteobacteria,1SCMH@1236|Gammaproteobacteria,3ZMKI@590|Salmonella	1236|Gammaproteobacteria
g61	group_5973		DUF2754 domain-containing protein	hit	S	Protein of unknown function (DUF2754)	yaiZ	GO:0005575,GO:0005623,GO:0005886,GO:0016020,GO:0044464,GO:0071944	group_5973	220341.16501648	8.09e-48	152.0	2CZ6J@1|root,32T5P@2|Bacteria,1N38Y@1224|Proteobacteria,1SA26@1236|Gammaproteobacteria,3ZMM7@590|Salmonella	1236|Gammaproteobacteria
g62	rpsU	rpsU	30S ribosomal protein S21	hit	J	Belongs to the bacterial ribosomal protein bS21 family	rpsU	GO:0000028,GO:0003674,GO:0003735,GO:0005198,GO:0005575,GO:0005622,GO:0005623,GO:0005737,GO:0005829,GO:0005840,GO:0006412,GO:0006518,GO:0006807,GO:0006996,GO:0008150,GO:0008152,GO:0009058,GO:0009059,GO:0009987,GO:0010467,GO:0015935,GO:0016043,GO:0019538,GO:0022607,GO:0022613,GO:0022618,GO:0022626,GO:0022627,GO:0032991,GO:0034622,GO:0034641,GO:0034645,GO:0042254,GO:0042255,GO:0042274,GO:0043043,GO:…	rpsU	1005994.GTGU_04164	4.94e-40	132.0	COG0828@1|root,COG0828@2|Bacteria,1MZCC@1224|Proteobacteria,1S8QZ@1236|Gammaproteobacteria	1236|Gammaproteobacteria
g63	hha	hha	Hemolysin expression-modulating protein Hha	hit	S	Haemolysin expression modulating protein	hha	GO:0005575,GO:0005622,GO:0005623,GO:0005737,GO:0005829,GO:0008150,GO:0010468,GO:0019222,GO:0032879,GO:0040012,GO:0040017,GO:0043900,GO:0043901,GO:0044424,GO:0044444,GO:0044464,GO:0048518,GO:0048519,GO:0048522,GO:0048523,GO:0050789,GO:0050794,GO:0051270,GO:0051272,GO:0060255,GO:0065007,GO:1900190,GO:1900191,GO:2000145,GO:2000147	hha	1114922.CIFAM_17_00500	4.15e-46	148.0	2CN5N@1|root,32SGA@2|Bacteria,1MZDE@1224|Proteobacteria,1S995@1236|Gammaproteobacteria,3WYTG@544|Citrobacter	1236|Gammaproteobacteria
g64	infA	infA	translation initiation factor IF-1	hit	J	One of the essential components for the initiation of protein synthesis. Stabilizes the binding of IF-2 and IF-3 on the 30S subunit to which N-formylmethionyl-tRNA(fMet) subsequently binds. Helps modulate mRNA selection, yielding the 30S pre- initiation complex (PIC). Upon addition of the 50S ribosomal subunit IF-1, IF-2 and IF-3 are released leaving the mature 70S translation initation complex	infA	GO:0003674,GO:0003676,GO:0003723,GO:0003743,GO:0005488,GO:0005575,GO:0005622,GO:0005623,GO:0005737,GO:0005829,GO:0006412,GO:0006413,GO:0006518,GO:0006807,GO:0008135,GO:0008150,GO:0008152,GO:0009058,GO:0009059,GO:0009987,GO:0010467,GO:0019538,GO:0034641,GO:0034645,GO:0043021,GO:0043022,GO:0043043,GO:0043170,GO:0043603,GO:0043604,GO:0044237,GO:0044238,GO:0044249,GO:0044260,GO:0044267,GO:0044271,GO:…	infA	1005994.GTGU_01094	2.41e-45	146.0	COG0361@1|root,COG0361@2|Bacteria,1MZFU@1224|Proteobacteria,1S8WZ@1236|Gammaproteobacteria	1236|Gammaproteobacteria
g65	yheU	yheU	YheU family protein	hit	S	Uncharacterised protein family (UPF0270)	yheU	-	yheU	220341.16505127	5.9e-46	147.0	COG3089@1|root,COG3089@2|Bacteria,1N6TM@1224|Proteobacteria,1SCDE@1236|Gammaproteobacteria,3ZMKJ@590|Salmonella	1236|Gammaproteobacteria
g66	mbtH	mbtH	MbtH family protein	hit	S	MbtH-like protein	ybdZ	GO:0005575,GO:0005622,GO:0005623,GO:0005737,GO:0005829,GO:0044424,GO:0044444,GO:0044464	mbtH	90371.CY43_03220	3.25e-52	163.0	COG3251@1|root,COG3251@2|Bacteria,1N87J@1224|Proteobacteria,1SCB8@1236|Gammaproteobacteria,3ZMJR@590|Salmonella	1236|Gammaproteobacteria
g67	group_5954		Putative quorum-sensing-regulated virulence factor	hit	S	Putative quorum-sensing-regulated virulence factor	ypeB	-	group_5954	90371.CY43_12980	8.38e-46	147.0	COG3530@1|root,COG3530@2|Bacteria,1N7GT@1224|Proteobacteria,1SCBX@1236|Gammaproteobacteria,3ZMJE@590|Salmonella	1236|Gammaproteobacteria
g68	osmB	osmB	osmotically-inducible lipoprotein OsmB	hit	M	Glycine zipper 2TM domain	osmB	-	osmB	90371.CY43_08710	4.36e-39	130.0	2CMW8@1|root,32SFP@2|Bacteria,1N0HV@1224|Proteobacteria,1S93Y@1236|Gammaproteobacteria,3ZMIH@590|Salmonella	1236|Gammaproteobacteria
g69	msrB	msrB	Peptide methionine sulfoxide reductase MsrB	hit	O	SelR domain	msrB	GO:0003674,GO:0003824,GO:0005488,GO:0005506,GO:0005575,GO:0005622,GO:0005623,GO:0005737,GO:0005829,GO:0006807,GO:0008150,GO:0008152,GO:0008270,GO:0009987,GO:0016491,GO:0016667,GO:0016671,GO:0019538,GO:0030091,GO:0033743,GO:0043167,GO:0043169,GO:0043170,GO:0044237,GO:0044238,GO:0044260,GO:0044267,GO:0044424,GO:0044444,GO:0044464,GO:0046872,GO:0046914,GO:0055114,GO:0071704,GO:1901564	msrB	220341.16502900	1.28e-104	301.0	COG0229@1|root,COG0229@2|Bacteria,1RGWC@1224|Proteobacteria,1S5WI@1236|Gammaproteobacteria,3ZKSD@590|Salmonella	1236|Gammaproteobacteria
g70	group_5936		zinc-ribbons	hit	S	zinc-ribbons	yfgJ	GO:0001539,GO:0006928,GO:0008150,GO:0009987,GO:0040011,GO:0048870,GO:0051179,GO:0051674,GO:0071973,GO:0071978,GO:0097588	group_5936	220341.16503733	1.17e-50	159.0	COG1645@1|root,COG1645@2|Bacteria,1N9D9@1224|Proteobacteria,1SCH3@1236|Gammaproteobacteria,3ZMN4@590|Salmonella	1236|Gammaproteobacteria
g71	cspD	cspD	cold shock-like protein CspD	hit	K	'Cold-shock' DNA-binding domain	cspD	GO:0003674,GO:0003676,GO:0003677,GO:0003697,GO:0003723,GO:0005488,GO:0005575,GO:0005622,GO:0005623,GO:0005737,GO:0005829,GO:0006275,GO:0006355,GO:0006950,GO:0008150,GO:0008156,GO:0009266,GO:0009409,GO:0009605,GO:0009628,GO:0009889,GO:0009890,GO:0009892,GO:0009991,GO:0010468,GO:0010556,GO:0010558,GO:0010605,GO:0019219,GO:0019222,GO:0031323,GO:0031324,GO:0031326,GO:0031327,GO:0031667,GO:0042594,GO:…	cspD	220341.16502109	9.66e-50	157.0	COG1278@1|root,COG1278@2|Bacteria,1N6Q5@1224|Proteobacteria,1SCA7@1236|Gammaproteobacteria,3ZMKV@590|Salmonella	1236|Gammaproteobacteria
g72	group_5919		hypothetical protein	no-hit
g73	group_5918		DUF2594 domain-containing protein	hit	S	Protein of unknown function (DUF2594)	yecF	-	group_5918	220341.16503192	1.09e-42	139.0	2E5U3@1|root,330IE@2|Bacteria,1N71V@1224|Proteobacteria,1SCS7@1236|Gammaproteobacteria,3ZMKH@590|Salmonella	1236|Gammaproteobacteria
g74	group_5891	yceK	YceK/YidQ family lipoprotein	hit	S	Protein of unknown function (DUF1375)	yceK	GO:0005575,GO:0005623,GO:0006950,GO:0006974,GO:0008150,GO:0009279,GO:0009987,GO:0016020,GO:0019867,GO:0030312,GO:0030313,GO:0031224,GO:0031230,GO:0031241,GO:0031246,GO:0031975,GO:0033554,GO:0044425,GO:0044462,GO:0044464,GO:0050896,GO:0051716,GO:0071944,GO:0098552	group_5891	220341.16502323	7.84e-50	157.0	COG5645@1|root,COG5645@2|Bacteria,1MZSU@1224|Proteobacteria,1S9EJ@1236|Gammaproteobacteria,3ZMN7@590|Salmonella	1236|Gammaproteobacteria
g75	yodD	yodD	YodD family peroxide/acid resistance protein	hit	S	Protein of unknown function (DUF2525)	yodD	GO:0000302,GO:0006950,GO:0006979,GO:0008150,GO:0009268,GO:0009628,GO:0009636,GO:0009987,GO:0010035,GO:0010447,GO:0033554,GO:0034599,GO:0034614,GO:0035690,GO:0042221,GO:0042493,GO:0042542,GO:0042710,GO:0044010,GO:0044011,GO:0044764,GO:0046677,GO:0050896,GO:0051703,GO:0051704,GO:0051716,GO:0070301,GO:0070887,GO:0071214,GO:0071236,GO:0071467,GO:0071468,GO:0090605,GO:0090609,GO:0097237,GO:0104004,GO:…	yodD	220341.16503225	1.04e-45	147.0	2E0QC@1|root,32W92@2|Bacteria,1NC7W@1224|Proteobacteria,1SBI7@1236|Gammaproteobacteria,3ZMJX@590|Salmonella	1236|Gammaproteobacteria
g76	group_5889		Transposase	hit	L	Transposase IS200 like	yafM	GO:0000014,GO:0000217,GO:0000405,GO:0003674,GO:0003676,GO:0003677,GO:0003697,GO:0003824,GO:0004518,GO:0004519,GO:0004520,GO:0004536,GO:0005488,GO:0006139,GO:0006259,GO:0006310,GO:0006725,GO:0006807,GO:0008150,GO:0008152,GO:0009987,GO:0016787,GO:0016788,GO:0032448,GO:0034641,GO:0043170,GO:0043565,GO:0044237,GO:0044238,GO:0044260,GO:0046483,GO:0071704,GO:0090304,GO:0090305,GO:0097159,GO:0140097,GO:…	group_5889	218493.SBG_3982	1.93e-54	172.0	COG1943@1|root,COG1943@2|Bacteria,1RCWW@1224|Proteobacteria,1S3ZJ@1236|Gammaproteobacteria,3ZMS7@590|Salmonella	1236|Gammaproteobacteria
g77	feoA	feoA	ferrous iron transporter A	hit	P	FeoA domain	feoA	GO:0000041,GO:0006810,GO:0006811,GO:0006812,GO:0006826,GO:0006950,GO:0006974,GO:0008150,GO:0009987,GO:0015684,GO:0030001,GO:0033554,GO:0034220,GO:0034755,GO:0050896,GO:0051179,GO:0051234,GO:0051716,GO:0055085,GO:0070627,GO:0070838,GO:0072511,GO:0097286,GO:0098655,GO:0098657,GO:0098659,GO:0098660,GO:0098662,GO:0098707,GO:0098711,GO:0098739,GO:0099587,GO:1903874	feoA	1197719.A464_3584	1.79e-46	149.0	COG1918@1|root,COG1918@2|Bacteria,1N8ZJ@1224|Proteobacteria,1S9TZ@1236|Gammaproteobacteria,3ZMKK@590|Salmonella	1236|Gammaproteobacteria
g78	yejL	yejL	UPF0352 protein YejL	hit	S	Protein of unknown function (DUF1414)	yejL	GO:0005575,GO:0005622,GO:0005623,GO:0005737,GO:0005829,GO:0044424,GO:0044444,GO:0044464	yejL	220341.16503466	1.66e-42	139.0	COG3082@1|root,COG3082@2|Bacteria,1MZ9I@1224|Proteobacteria,1S8XQ@1236|Gammaproteobacteria,3ZMJT@590|Salmonella	1236|Gammaproteobacteria
g79	rpsR	rpsR	30S ribosomal protein S18	hit	J	Binds as a heterodimer with protein S6 to the central domain of the 16S rRNA, where it helps stabilize the platform of the 30S subunit	rpsR	GO:0003674,GO:0003676,GO:0003723,GO:0003729,GO:0003735,GO:0005198,GO:0005488,GO:0005575,GO:0005622,GO:0005623,GO:0005737,GO:0005829,GO:0005840,GO:0006412,GO:0006518,GO:0006807,GO:0008150,GO:0008152,GO:0009058,GO:0009059,GO:0009987,GO:0010467,GO:0015935,GO:0019538,GO:0019843,GO:0022626,GO:0022627,GO:0032991,GO:0034641,GO:0034645,GO:0043043,GO:0043170,GO:0043226,GO:0043228,GO:0043229,GO:0043232,GO:…	rpsR	1005994.GTGU_02012	3.61e-46	148.0	COG0238@1|root,COG0238@2|Bacteria,1MZ8U@1224|Proteobacteria,1S8R8@1236|Gammaproteobacteria	1236|Gammaproteobacteria
g80	group_5888		YgdI/YgdR family lipoprotein	hit	M	Bacterial protein of unknown function (DUF903)	ygdI	-	group_5888	220341.16504063	6.23e-47	150.0	2E9MC@1|root,32RSI@2|Bacteria,1N053@1224|Proteobacteria,1S9DM@1236|Gammaproteobacteria,3ZMIU@590|Salmonella	1236|Gammaproteobacteria
g81	group_5869		YgdI/YgdR family lipoprotein	hit	M	Bacterial protein of unknown function (DUF903)	ygdi3	-	group_5869	220341.16501363	9.17e-45	145.0	2E9MC@1|root,32U4J@2|Bacteria,1MZYU@1224|Proteobacteria,1S9HJ@1236|Gammaproteobacteria,3ZMJF@590|Salmonella	1236|Gammaproteobacteria
g82	group_5831		DUF1435 domain-containing protein	hit	S	Protein of unknown function (DUF1435)	yjjZ	-	group_5831	220341.16505659	1.95e-22	89.0	2CF73@1|root,32RSY@2|Bacteria,1N033@1224|Proteobacteria,1SC0F@1236|Gammaproteobacteria,3ZMN2@590|Salmonella	1236|Gammaproteobacteria
g83	acpP	acpP	acyl carrier protein	hit	IQ	Carrier of the growing fatty acid chain in fatty acid biosynthesis	acpP	GO:0000035,GO:0000036,GO:0003674,GO:0005488,GO:0005575,GO:0005622,GO:0005623,GO:0005737,GO:0005829,GO:0005975,GO:0006082,GO:0006629,GO:0006631,GO:0006633,GO:0006643,GO:0006644,GO:0006664,GO:0006793,GO:0006796,GO:0008150,GO:0008152,GO:0008289,GO:0008610,GO:0008654,GO:0009058,GO:0009245,GO:0009247,GO:0009311,GO:0009312,GO:0009987,GO:0016051,GO:0016053,GO:0019637,GO:0019752,GO:0019842,GO:0031177,GO:…	acpP	1005994.GTGU_00900	2.13e-44	144.0	COG0236@1|root,COG0236@2|Bacteria,1MZ4P@1224|Proteobacteria,1S8X4@1236|Gammaproteobacteria	1236|Gammaproteobacteria
g84	rclB	rclB	reactive chlorine resistance periplasmic protein RclB	hit	S	Protein of unknown function (DUF1471)	ykgI	GO:0000302,GO:0001101,GO:0006950,GO:0006979,GO:0008150,GO:0010035,GO:0042221,GO:0050896,GO:1901530,GO:1901700	rclB	220341.16501823	2.05e-42	139.0	2EF6J@1|root,338ZN@2|Bacteria,1NATQ@1224|Proteobacteria,1SG5Y@1236|Gammaproteobacteria,3ZMN6@590|Salmonella	1236|Gammaproteobacteria
g85	rpmB	rpmB	50S ribosomal protein L28	hit	J	Ribosomal L28 family	rpmB	GO:0000027,GO:0003674,GO:0003735,GO:0005198,GO:0005575,GO:0005622,GO:0005623,GO:0005737,GO:0005829,GO:0005840,GO:0006412,GO:0006518,GO:0006807,GO:0006996,GO:0008150,GO:0008152,GO:0009058,GO:0009059,GO:0009987,GO:0010467,GO:0015934,GO:0016043,GO:0019538,GO:0022607,GO:0022613,GO:0022618,GO:0022625,GO:0022626,GO:0032991,GO:0034622,GO:0034641,GO:0034645,GO:0042254,GO:0042255,GO:0042273,GO:0043043,GO:…	rpmB	220341.16504886	8e-49	155.0	COG0227@1|root,COG0227@2|Bacteria,1MZ57@1224|Proteobacteria,1S8UG@1236|Gammaproteobacteria,3ZMK4@590|Salmonella	1236|Gammaproteobacteria
g86	atpE	atpE	F0F1 ATP synthase subunit C	hit	C	F(1)F(0) ATP synthase produces ATP from ADP in the presence of a proton or sodium gradient. F-type ATPases consist of two structural domains, F(1) containing the extramembraneous catalytic core and F(0) containing the membrane proton channel, linked together by a central stalk and a peripheral stalk. During catalysis, ATP synthesis in the catalytic domain of F(1) is coupled via a rotary mechanism…	atpE	GO:0003674,GO:0003824,GO:0005215,GO:0005575,GO:0005622,GO:0005623,GO:0006139,GO:0006163,GO:0006164,GO:0006725,GO:0006753,GO:0006754,GO:0006793,GO:0006796,GO:0006807,GO:0006810,GO:0006811,GO:0006812,GO:0008150,GO:0008152,GO:0008324,GO:0009058,GO:0009117,GO:0009123,GO:0009124,GO:0009126,GO:0009127,GO:0009141,GO:0009142,GO:0009144,GO:0009145,GO:0009150,GO:0009152,GO:0009156,GO:0009161,GO:0009165,GO:…	atpE	1005994.GTGU_04025	2.29e-44	144.0	COG0636@1|root,32S3K@2|Bacteria,1N1NA@1224|Proteobacteria,1S9MD@1236|Gammaproteobacteria	1236|Gammaproteobacteria
g87	group_5811		DUF2492 domain-containing protein	hit	S	Protein of unknown function (DUF2492)	yecH	-	group_5811	220341.16503180	7.33e-50	158.0	2E9BS@1|root,333JI@2|Bacteria,1N09N@1224|Proteobacteria,1SA8V@1236|Gammaproteobacteria,3ZMJA@590|Salmonella	1236|Gammaproteobacteria
g88	ydhL	ydhL	DUF1289 domain-containing protein	hit	S	Protein of unknown function (DUF1289)	ydhL	-	ydhL	220341.16502771	3.77e-52	164.0	COG3313@1|root,COG3313@2|Bacteria,1NGD5@1224|Proteobacteria,1SCBM@1236|Gammaproteobacteria,3ZMM4@590|Salmonella	1236|Gammaproteobacteria
g89	zapB	zapB	septal ring assembly protein ZapB	hit	D	Non-essential, abundant cell division factor that is required for proper Z-ring formation. It is recruited early to the divisome by direct interaction with FtsZ, stimulating Z-ring assembly and thereby promoting cell division earlier in the cell cycle. Its recruitment to the Z-ring requires functional FtsA or ZipA	zapB	GO:0000003,GO:0000910,GO:0003674,GO:0005488,GO:0005515,GO:0005575,GO:0005622,GO:0005623,GO:0005737,GO:0005829,GO:0007049,GO:0008150,GO:0009987,GO:0019954,GO:0022402,GO:0022414,GO:0032153,GO:0032505,GO:0042802,GO:0043093,GO:0044424,GO:0044444,GO:0044464,GO:0051301	zapB	220341.16504651	6.09e-31	110.0	COG3074@1|root,COG3074@2|Bacteria,1MZJE@1224|Proteobacteria,1S8TG@1236|Gammaproteobacteria,3ZMM1@590|Salmonella	1236|Gammaproteobacteria
g90	group_5810		cytoplasmic protein	hit	-	-	-	-	group_5810	90371.CY43_13025	1.08e-51	162.0	2E27Z@1|root,32XE6@2|Bacteria,1N137@1224|Proteobacteria,1SBDB@1236|Gammaproteobacteria,3ZMJV@590|Salmonella	1236|Gammaproteobacteria
g91	cedA	cedA	cell division activator CedA	hit	D	Activates the cell division inhibited by chromosomal DNA over-replication	cedA	GO:0003674,GO:0003676,GO:0003677,GO:0003690,GO:0005488,GO:0008150,GO:0050789,GO:0050794,GO:0051302,GO:0065007,GO:0097159,GO:1901363	cedA	220341.16502871	2.85e-52	164.0	2CFPH@1|root,32S26@2|Bacteria,1N1CP@1224|Proteobacteria,1S8XC@1236|Gammaproteobacteria,3ZMEP@590|Salmonella	1236|Gammaproteobacteria
g92	xseB	xseB	exodeoxyribonuclease VII small subunit	hit	L	Bidirectionally degrades single-stranded DNA into large acid-insoluble oligonucleotides, which are then degraded further into small acid-soluble oligonucleotides	xseB	GO:0003674,GO:0003824,GO:0004518,GO:0004527,GO:0004529,GO:0004536,GO:0005575,GO:0005622,GO:0005623,GO:0005737,GO:0005829,GO:0006139,GO:0006259,GO:0006308,GO:0006725,GO:0006807,GO:0008150,GO:0008152,GO:0008855,GO:0009056,GO:0009057,GO:0009318,GO:0009987,GO:0016787,GO:0016788,GO:0016796,GO:0016895,GO:0019439,GO:0032991,GO:0034641,GO:0034655,GO:0043170,GO:0044237,GO:0044238,GO:0044248,GO:0044260,GO:…	xseB	220341.16501692	3.1e-47	151.0	COG1722@1|root,COG1722@2|Bacteria,1N72V@1224|Proteobacteria,1SC7N@1236|Gammaproteobacteria,3ZMIN@590|Salmonella	1236|Gammaproteobacteria
g93	group_5789	relB	type II toxin-antitoxin system RelB/DinJ family antitoxin	hit	L	RelB antitoxin	relB	-	group_5789	220341.16505557	5.34e-48	153.0	COG3077@1|root,COG3077@2|Bacteria,1N8G2@1224|Proteobacteria,1SCQI@1236|Gammaproteobacteria,3ZNCQ@590|Salmonella	1236|Gammaproteobacteria
g94	group_5788		Glycerate kinase	hit	G	Glycerate kinase family	garK	-	group_5788	90371.CY43_13315	3.56e-42	140.0	COG1929@1|root,COG1929@2|Bacteria,1MVG9@1224|Proteobacteria,1RMC6@1236|Gammaproteobacteria,3ZKP8@590|Salmonella	1236|Gammaproteobacteria
g95	moaD	moaD	molybdopterin synthase sulfur carrier subunit	hit	H	Involved in sulfur transfer in the conversion of molybdopterin precursor Z to molybdopterin	moaD	GO:0005575,GO:0005622,GO:0005623,GO:0005737,GO:0005829,GO:0006732,GO:0006777,GO:0006793,GO:0006796,GO:0006807,GO:0008150,GO:0008152,GO:0009058,GO:0009108,GO:0009987,GO:0018130,GO:0019538,GO:0019637,GO:0019720,GO:0043170,GO:0043545,GO:0044237,GO:0044238,GO:0044249,GO:0044260,GO:0044267,GO:0044424,GO:0044444,GO:0044464,GO:0046483,GO:0051186,GO:0051188,GO:0051189,GO:0071704,GO:0090407,GO:1901360,GO:…	moaD	90371.CY43_04320	1.77e-51	162.0	COG1977@1|root,COG1977@2|Bacteria,1N0IE@1224|Proteobacteria,1S8S1@1236|Gammaproteobacteria,3ZMK5@590|Salmonella	1236|Gammaproteobacteria
g96	hybG	hybG	hydrogenase maturation factor HybG	hit	O	HupF/HypC family	hybG	GO:0003674,GO:0005488,GO:0005506,GO:0005515,GO:0006807,GO:0008144,GO:0008150,GO:0008152,GO:0010467,GO:0019538,GO:0042802,GO:0043167,GO:0043169,GO:0043170,GO:0044238,GO:0046872,GO:0046914,GO:0051604,GO:0071704,GO:1901564,GO:1902670	hybG	220341.16504223	1.14e-52	165.0	COG0298@1|root,COG0298@2|Bacteria,1RGXH@1224|Proteobacteria,1S96I@1236|Gammaproteobacteria,3ZMGW@590|Salmonella	1236|Gammaproteobacteria
g97	rpsP	rpsP	30S ribosomal protein S16	hit	J	Ribosomal protein S16	rpsP	GO:0000028,GO:0000217,GO:0000400,GO:0003674,GO:0003676,GO:0003677,GO:0003735,GO:0003824,GO:0004518,GO:0004519,GO:0004520,GO:0004536,GO:0005198,GO:0005488,GO:0005575,GO:0005622,GO:0005623,GO:0005737,GO:0005829,GO:0005840,GO:0006139,GO:0006259,GO:0006412,GO:0006518,GO:0006725,GO:0006807,GO:0006996,GO:0008150,GO:0008152,GO:0009058,GO:0009059,GO:0009987,GO:0010467,GO:0015935,GO:0016043,GO:0016787,GO:…	rpsP	220341.16503830	9.43e-52	163.0	COG0228@1|root,COG0228@2|Bacteria,1MZCT@1224|Proteobacteria,1S8RT@1236|Gammaproteobacteria,3ZMHE@590|Salmonella	1236|Gammaproteobacteria
g98	arfB	arfB	aminoacyl-tRNA hydrolase	hit	J	RF-1 domain	yaeJ	GO:0003674,GO:0003676,GO:0003723,GO:0003747,GO:0003824,GO:0004045,GO:0005488,GO:0006412,GO:0006414,GO:0006415,GO:0006417,GO:0006518,GO:0006807,GO:0008079,GO:0008135,GO:0008150,GO:0008152,GO:0009058,GO:0009059,GO:0009889,GO:0009987,GO:0010467,GO:0010468,GO:0010556,GO:0010608,GO:0016043,GO:0016150,GO:0016787,GO:0016788,GO:0019222,GO:0019538,GO:0022411,GO:0031323,GO:0031326,GO:0032268,GO:0032984,GO:…	arfB	90371.CY43_01205	2.66e-76	229.0	COG1186@1|root,COG1186@2|Bacteria,1RH75@1224|Proteobacteria,1S5YQ@1236|Gammaproteobacteria,3ZM8K@590|Salmonella	1236|Gammaproteobacteria
g99	group_5741		Putative exported protein	no-hit
g100	grxC	grxC	glutaredoxin 3	hit	O	Has a glutathione-disulfide oxidoreductase activity in the presence of NADPH and glutathione reductase. Reduces low molecular weight disulfides and proteins	grxC	GO:0003674,GO:0003824,GO:0005488,GO:0005575,GO:0005622,GO:0005623,GO:0005737,GO:0005829,GO:0008150,GO:0008152,GO:0015035,GO:0015036,GO:0016491,GO:0016667,GO:0033218,GO:0042277,GO:0043167,GO:0043168,GO:0043295,GO:0044424,GO:0044444,GO:0044464,GO:0048037,GO:0055114,GO:0072341,GO:1900750,GO:1901681	grxC	1197719.A464_3778	2.2e-55	172.0	COG0695@1|root,COG0695@2|Bacteria,1N72P@1224|Proteobacteria,1SCA2@1236|Gammaproteobacteria,3ZMEN@590|Salmonella	1236|Gammaproteobacteria
g101	yciN	yciN	Protein YciN	hit	S	Protein of unknown function (DUF2498)	yciN	GO:0005575,GO:0005622,GO:0005623,GO:0005737,GO:0005829,GO:0044424,GO:0044444,GO:0044464	yciN	220341.16502459	5.2e-54	169.0	2CK10@1|root,32SBA@2|Bacteria,1N8PV@1224|Proteobacteria,1S938@1236|Gammaproteobacteria,3ZMGM@590|Salmonella	1236|Gammaproteobacteria
g102	bssS	bssS	biofilm formation regulator BssS	hit	S	BssS protein family	bssS	GO:0008150,GO:0043900,GO:0050789,GO:0050794,GO:0065007,GO:1900190	bssS	90371.CY43_05920	3.49e-57	177.0	2CFXH@1|root,32S2R@2|Bacteria,1MZNE@1224|Proteobacteria,1S8Z0@1236|Gammaproteobacteria,3ZMFI@590|Salmonella	1236|Gammaproteobacteria
g103	rpsQ	rpsQ	30S ribosomal protein S17	hit	J	One of the primary rRNA binding proteins, it binds specifically to the 5'-end of 16S ribosomal RNA	rpsQ	GO:0000028,GO:0003674,GO:0003676,GO:0003723,GO:0003735,GO:0005198,GO:0005488,GO:0005575,GO:0005622,GO:0005623,GO:0005737,GO:0005829,GO:0005840,GO:0006412,GO:0006518,GO:0006807,GO:0006996,GO:0008150,GO:0008152,GO:0009058,GO:0009059,GO:0009987,GO:0010467,GO:0015935,GO:0016043,GO:0019538,GO:0019843,GO:0022607,GO:0022613,GO:0022618,GO:0022626,GO:0022627,GO:0032991,GO:0034622,GO:0034641,GO:0034645,GO:…	rpsQ	1197719.A464_3506	1.37e-54	170.0	COG0186@1|root,COG0186@2|Bacteria,1MZIK@1224|Proteobacteria,1S8SS@1236|Gammaproteobacteria,3ZMG5@590|Salmonella	1236|Gammaproteobacteria
g104	tatA	tatA	Sec-independent protein translocase subunit TatA	hit	U	Part of the twin-arginine translocation (Tat) system that transports large folded proteins containing a characteristic twin-arginine motif in their signal peptide across membranes. TatA could form the protein-conducting channel of the Tat system	tatA	GO:0002790,GO:0003674,GO:0005215,GO:0005488,GO:0005515,GO:0005575,GO:0005622,GO:0005623,GO:0005737,GO:0005829,GO:0005886,GO:0005887,GO:0006810,GO:0006886,GO:0008104,GO:0008150,GO:0008320,GO:0008565,GO:0009306,GO:0009977,GO:0009987,GO:0015031,GO:0015291,GO:0015399,GO:0015405,GO:0015450,GO:0015833,GO:0016020,GO:0016021,GO:0022804,GO:0022857,GO:0022884,GO:0031224,GO:0031226,GO:0032940,GO:0032991,GO:…	tatA	1197719.A464_4028	3.39e-46	149.0	COG1826@1|root,COG1826@2|Bacteria,1N6S4@1224|Proteobacteria,1SCC7@1236|Gammaproteobacteria,3ZMJ9@590|Salmonella	1236|Gammaproteobacteria
g105	yfaE	yfaE	ferredoxin-like diferric-tyrosyl radical cofactor maintenance protein YfaE	hit	C	2Fe-2S iron-sulfur cluster binding domain	yfaE	GO:0003674,GO:0003824,GO:0005488,GO:0005575,GO:0005622,GO:0005623,GO:0005737,GO:0006091,GO:0006124,GO:0006464,GO:0006807,GO:0008150,GO:0008152,GO:0009055,GO:0009987,GO:0016491,GO:0019538,GO:0022900,GO:0030091,GO:0036211,GO:0043170,GO:0043412,GO:0044237,GO:0044238,GO:0044260,GO:0044267,GO:0044424,GO:0044464,GO:0048037,GO:0051536,GO:0051537,GO:0051540,GO:0055114,GO:0071704,GO:1901564	yfaE	220341.16503504	2.54e-59	182.0	COG1018@1|root,COG1018@2|Bacteria,1N6XY@1224|Proteobacteria,1SC8M@1236|Gammaproteobacteria,3ZMEI@590|Salmonella	1236|Gammaproteobacteria
g106	yeaQ	yeaQ	GlsB/YeaQ/YmgE family stress response membrane protein	hit	S	Transglycosylase associated protein	ymgE	-	yeaQ	1197719.A464_1897	1.74e-48	155.0	COG2261@1|root,COG2261@2|Bacteria,1N72W@1224|Proteobacteria,1S8YP@1236|Gammaproteobacteria,3ZMMM@590|Salmonella	1236|Gammaproteobacteria
g107	group_5701		DUF1488 domain-containing protein	hit	S	Protein of unknown function (DUF1488)	yrdB	-	group_5701	90371.CY43_17705	1.85e-57	177.0	2E6QS@1|root,331AY@2|Bacteria,1N7X6@1224|Proteobacteria,1SC8J@1236|Gammaproteobacteria,3ZMN8@590|Salmonella	1236|Gammaproteobacteria
g108	rpmA	rpmA	50S ribosomal protein L27	hit	J	Ribosomal L27 protein	rpmA	GO:0000027,GO:0001558,GO:0003674,GO:0003735,GO:0005198,GO:0005488,GO:0005575,GO:0005622,GO:0005623,GO:0005737,GO:0005829,GO:0005840,GO:0006412,GO:0006518,GO:0006807,GO:0006996,GO:0008150,GO:0008152,GO:0009058,GO:0009059,GO:0009987,GO:0010467,GO:0015934,GO:0016043,GO:0019538,GO:0022607,GO:0022613,GO:0022618,GO:0022625,GO:0022626,GO:0032991,GO:0034622,GO:0034641,GO:0034645,GO:0040008,GO:0042254,GO:…	rpmA	1197719.A464_3384	6.01e-54	169.0	COG0211@1|root,COG0211@2|Bacteria,1MZGH@1224|Proteobacteria,1S8R2@1236|Gammaproteobacteria,3ZMH1@590|Salmonella	1236|Gammaproteobacteria
g109	yjhX	yjhX	UPF0386 protein YjhX	hit	S	Putative toxin of bacterial toxin-antitoxin pair	yjhX	GO:0003674,GO:0005488,GO:0005515,GO:0008150,GO:0010911,GO:0019899,GO:0044547,GO:0050790,GO:0065007,GO:0065009	yjhX	220341.16505617	2.09e-54	170.0	COG3811@1|root,COG3811@2|Bacteria,1N7N0@1224|Proteobacteria,1SB6I@1236|Gammaproteobacteria,3ZMHQ@590|Salmonella	1236|Gammaproteobacteria
g110	pmrD	pmrD	signal transduction protein PmrD	hit	S	Polymyxin resistance protein PmrD	pmrD	-	pmrD	90371.CY43_12345	1.11e-58	181.0	2EDNI@1|root,337I9@2|Bacteria,1NBZ4@1224|Proteobacteria,1SDH3@1236|Gammaproteobacteria,3ZMKR@590|Salmonella	1236|Gammaproteobacteria
g111	group_5700	ptsH	phosphocarrier protein Hpr	hit	G	PTS HPr component phosphorylation site	ptsH	GO:0003674,GO:0003824,GO:0005215,GO:0005575,GO:0005622,GO:0005623,GO:0005737,GO:0005829,GO:0005981,GO:0006109,GO:0006793,GO:0006796,GO:0006810,GO:0008047,GO:0008150,GO:0008152,GO:0008643,GO:0008965,GO:0008982,GO:0009401,GO:0009893,GO:0009894,GO:0009896,GO:0009987,GO:0010604,GO:0010675,GO:0010676,GO:0010906,GO:0010907,GO:0015144,GO:0016301,GO:0016310,GO:0016740,GO:0016772,GO:0016773,GO:0016775,GO:…	group_5700	1028307.EAE_00365	3.35e-51	162.0	COG1925@1|root,COG1925@2|Bacteria,1N0CV@1224|Proteobacteria,1S9R2@1236|Gammaproteobacteria,3X2IH@547|Enterobacter	1236|Gammaproteobacteria
g112	rpmE2	rpmE2	type B 50S ribosomal protein L31	hit	J	Ribosomal protein L31	rpmE2	GO:0003674,GO:0003735,GO:0005198,GO:0005575,GO:0005622,GO:0005623,GO:0005737,GO:0005829,GO:0005840,GO:0006412,GO:0006518,GO:0006807,GO:0006950,GO:0007154,GO:0008150,GO:0008152,GO:0009058,GO:0009059,GO:0009267,GO:0009605,GO:0009987,GO:0009991,GO:0010467,GO:0015934,GO:0019538,GO:0022625,GO:0022626,GO:0031667,GO:0031668,GO:0031669,GO:0032991,GO:0033554,GO:0034224,GO:0034641,GO:0034645,GO:0042594,GO:…	rpmE2	220341.16501741	9.87e-58	178.0	COG0254@1|root,COG0254@2|Bacteria,1MZ4D@1224|Proteobacteria,1S8V5@1236|Gammaproteobacteria,3ZMGX@590|Salmonella	1236|Gammaproteobacteria
g113	rof	rof	Rho-binding antiterminator	hit	K	Modulator of Rho-dependent transcription termination (ROF)	rof	GO:0006355,GO:0008150,GO:0009889,GO:0010468,GO:0010556,GO:0019219,GO:0019222,GO:0031323,GO:0031326,GO:0031554,GO:0031564,GO:0043244,GO:0050789,GO:0050794,GO:0051128,GO:0051171,GO:0051252,GO:0060255,GO:0065007,GO:0080090,GO:1903506,GO:2000112,GO:2001141	rof	90371.CY43_01190	1.92e-55	172.0	COG4568@1|root,COG4568@2|Bacteria,1MZYG@1224|Proteobacteria,1S8Y7@1236|Gammaproteobacteria,3ZMGT@590|Salmonella	1236|Gammaproteobacteria
g114	spaQ	spaQ	SPI-1 type III secretion system export apparatus protein SpaQ	hit	U	Bacterial export proteins, family 3	spaQ	-	spaQ	220341.16503967	6.46e-54	169.0	COG4794@1|root,COG4794@2|Bacteria,1N6RK@1224|Proteobacteria,1SCHY@1236|Gammaproteobacteria,3ZMI1@590|Salmonella	1236|Gammaproteobacteria
g115	group_5669	yhcN	peroxide/acid stress response protein YhcN	hit	S	Protein of unknown function (DUF1471)	yhcN	-	group_5669	90371.CY43_17505	5.5e-51	161.0	2CAQ2@1|root,31NM5@2|Bacteria,1N52F@1224|Proteobacteria,1SB1B@1236|Gammaproteobacteria,3ZMFE@590|Salmonella	1236|Gammaproteobacteria
g116	ilvM	ilvM	acetolactate synthase 2 small subunit	hit	S	ACT domain	ilvM	GO:0003674,GO:0003824,GO:0003984,GO:0006082,GO:0006520,GO:0006807,GO:0008150,GO:0008152,GO:0008652,GO:0009058,GO:0009987,GO:0016053,GO:0016740,GO:0016744,GO:0019752,GO:0043436,GO:0044237,GO:0044238,GO:0044249,GO:0044281,GO:0044283,GO:0046394,GO:0071704,GO:1901564,GO:1901566,GO:1901576	ilvM	90371.CY43_20440	1.4e-53	168.0	COG3978@1|root,COG3978@2|Bacteria,1MZ9W@1224|Proteobacteria,1S8VQ@1236|Gammaproteobacteria,3ZMHM@590|Salmonella	1236|Gammaproteobacteria
g117	napD	napD	chaperone NapD	hit	P	NapD protein	napD	GO:0003674,GO:0005048,GO:0005488,GO:0005575,GO:0005622,GO:0005623,GO:0005737,GO:0008150,GO:0032879,GO:0032880,GO:0033218,GO:0042277,GO:0044424,GO:0044464,GO:0048519,GO:0050789,GO:0051049,GO:0051051,GO:0051223,GO:0051224,GO:0065007,GO:0070201,GO:0090087,GO:1904950	napD	220341.16503487	5.71e-53	166.0	COG3062@1|root,COG3062@2|Bacteria,1N6UA@1224|Proteobacteria,1SCSX@1236|Gammaproteobacteria,3ZMED@590|Salmonella	1236|Gammaproteobacteria
g118	ybeD	ybeD	DUF493 domain-containing protein	hit	S	Protein of unknown function (DUF493)	ybeD	GO:0005575,GO:0005622,GO:0005623,GO:0005737,GO:0005829,GO:0044424,GO:0044444,GO:0044464	ybeD	1197719.A464_612	3.56e-56	174.0	COG2921@1|root,COG2921@2|Bacteria,1RGV5@1224|Proteobacteria,1S61Y@1236|Gammaproteobacteria,3ZMHS@590|Salmonella	1236|Gammaproteobacteria
g119	yhcN	yhcN	peroxide/acid stress response protein YhcN	hit	S	Protein of unknown function (DUF1471)	yhcN	-	yhcN	220341.16504424	1.56e-55	173.0	2CAQ2@1|root,32S09@2|Bacteria,1N0XS@1224|Proteobacteria,1S9G5@1236|Gammaproteobacteria,3ZMEM@590|Salmonella	1236|Gammaproteobacteria
g120	sdhE	sdhE	FAD assembly factor SdhE	hit	S	Flavinator of succinate dehydrogenase	ygfY	GO:0006082,GO:0006091,GO:0006099,GO:0006101,GO:0006105,GO:0006464,GO:0006807,GO:0008150,GO:0008152,GO:0009060,GO:0009987,GO:0015980,GO:0016043,GO:0016999,GO:0017013,GO:0017144,GO:0018065,GO:0018293,GO:0019538,GO:0019752,GO:0022607,GO:0034552,GO:0034622,GO:0036211,GO:0043170,GO:0043412,GO:0043436,GO:0043648,GO:0043933,GO:0044085,GO:0044237,GO:0044238,GO:0044260,GO:0044267,GO:0044281,GO:0045333,GO:…	sdhE	1197719.A464_3057	1.44e-60	186.0	COG2938@1|root,COG2938@2|Bacteria,1N7P4@1224|Proteobacteria,1SCKB@1236|Gammaproteobacteria,3ZMG4@590|Salmonella	1236|Gammaproteobacteria
g121	minE	minE	cell division topological specificity factor MinE	hit	D	Prevents the cell division inhibition by proteins MinC and MinD at internal division sites while permitting inhibition at polar sites. This ensures cell division at the proper site by restricting the formation of a division septum at the midpoint of the long axis of the cell	minE	GO:0000278,GO:0000281,GO:0000910,GO:0000917,GO:0000918,GO:0003674,GO:0005488,GO:0005515,GO:0005575,GO:0005622,GO:0005623,GO:0005737,GO:0005829,GO:0005886,GO:0007049,GO:0007346,GO:0008150,GO:0009987,GO:0010564,GO:0016020,GO:0016043,GO:0022402,GO:0022607,GO:0032465,GO:0032506,GO:0032954,GO:0032955,GO:0042802,GO:0044085,GO:0044087,GO:0044424,GO:0044444,GO:0044464,GO:0050789,GO:0050794,GO:0051128,GO:…	minE	1114922.CIFAM_04_03130	1.06e-53	168.0	COG0851@1|root,COG0851@2|Bacteria,1N6QD@1224|Proteobacteria,1SC8W@1236|Gammaproteobacteria,3WYJB@544|Citrobacter	1236|Gammaproteobacteria
g122	yihD	yihD	Protein YihD	hit	S	Protein of unknown function (DUF1040)	yihD	GO:0005575,GO:0005622,GO:0005623,GO:0005737,GO:0005829,GO:0044424,GO:0044444,GO:0044464	yihD	220341.16504741	1.49e-58	181.0	COG3084@1|root,COG3084@2|Bacteria,1N026@1224|Proteobacteria,1S93G@1236|Gammaproteobacteria,3ZMEC@590|Salmonella	1236|Gammaproteobacteria
g123	fliQ	fliQ	flagellar biosynthesis protein FliQ	hit	N	Flagellar biosynthetic protein FliQ	fliQ	-	fliQ	218493.SBG_1808	1.06e-49	158.0	COG1987@1|root,COG1987@2|Bacteria,1N73W@1224|Proteobacteria,1SCBG@1236|Gammaproteobacteria,3ZMI6@590|Salmonella	1236|Gammaproteobacteria
g124	group_5633		DUF1145 domain-containing protein	hit	S	Protein of unknown function (DUF1145)	yhhL	-	group_5633	90371.CY43_18550	3.97e-54	169.0	COG3776@1|root,COG3776@2|Bacteria,1N00W@1224|Proteobacteria,1SA2V@1236|Gammaproteobacteria,3ZMF8@590|Salmonella	1236|Gammaproteobacteria
g125	rpsO	rpsO	30S ribosomal protein S15	hit	J	Forms an intersubunit bridge (bridge B4) with the 23S rRNA of the 50S subunit in the ribosome	rpsO	GO:0000028,GO:0003674,GO:0003676,GO:0003723,GO:0003735,GO:0005198,GO:0005488,GO:0005575,GO:0005622,GO:0005623,GO:0005737,GO:0005829,GO:0005840,GO:0006139,GO:0006378,GO:0006396,GO:0006397,GO:0006412,GO:0006518,GO:0006725,GO:0006807,GO:0006996,GO:0008150,GO:0008152,GO:0009058,GO:0009059,GO:0009987,GO:0010467,GO:0015935,GO:0016043,GO:0016070,GO:0016071,GO:0019538,GO:0019843,GO:0022607,GO:0022613,GO:…	rpsO	1080067.BAZH01000031_gene2461	2.79e-54	170.0	COG0184@1|root,COG0184@2|Bacteria,1MZ2W@1224|Proteobacteria,1S8U6@1236|Gammaproteobacteria,3WYMU@544|Citrobacter	1236|Gammaproteobacteria
g126	barS	barS	Barstar domain-containing protein	hit	K	inhibitor	yhcO	-	barS	220341.16504425	1.13e-58	181.0	COG2732@1|root,COG2732@2|Bacteria,1MZ53@1224|Proteobacteria,1S8RD@1236|Gammaproteobacteria,3ZMG8@590|Salmonella	1236|Gammaproteobacteria
g127	npr	npr	PTS phosphocarrier protein NPr	hit	G	PTS HPr component phosphorylation site	ptsO	GO:0003674,GO:0003824,GO:0006464,GO:0006468,GO:0006793,GO:0006796,GO:0006807,GO:0006808,GO:0006810,GO:0008150,GO:0008152,GO:0008643,GO:0009401,GO:0009987,GO:0010033,GO:0010243,GO:0016310,GO:0016740,GO:0016772,GO:0019538,GO:0036211,GO:0042221,GO:0043170,GO:0043412,GO:0044237,GO:0044238,GO:0044260,GO:0044267,GO:0050789,GO:0050896,GO:0051179,GO:0051234,GO:0065007,GO:0071702,GO:0071704,GO:1901564,GO:…	npr	1197719.A464_3405	1.27e-55	173.0	COG1925@1|root,COG1925@2|Bacteria,1N6RM@1224|Proteobacteria,1SCXX@1236|Gammaproteobacteria,3ZMFS@590|Salmonella	1236|Gammaproteobacteria
g128	hupB	hupB	DNA-binding protein HU-beta	hit	L	Histone-like DNA-binding protein which is capable of wrapping DNA to stabilize it, and thus to prevent its denaturation under extreme environmental conditions	hupB	GO:0003674,GO:0003676,GO:0003677,GO:0005488,GO:0005515,GO:0005575,GO:0005622,GO:0005623,GO:0005694,GO:0005737,GO:0005829,GO:0006139,GO:0006323,GO:0006351,GO:0006725,GO:0006807,GO:0006996,GO:0008150,GO:0008152,GO:0009058,GO:0009059,GO:0009889,GO:0009987,GO:0010467,GO:0010556,GO:0016043,GO:0016070,GO:0018130,GO:0019219,GO:0019222,GO:0019438,GO:0031323,GO:0031326,GO:0032774,GO:0034641,GO:0034645,GO:…	hupB	1197719.A464_404	4.11e-52	164.0	COG0776@1|root,COG0776@2|Bacteria,1MZ5B@1224|Proteobacteria,1S8VH@1236|Gammaproteobacteria,3ZMG6@590|Salmonella	1236|Gammaproteobacteria
g129	group_5618	sgaB	PTS mannitol transporter subunit IIB	hit	G	PTS system, Lactose/Cellobiose specific IIB subunit	ulaB	-	group_5618	220341.16503567	4.26e-54	169.0	COG3414@1|root,COG3414@2|Bacteria,1RHFW@1224|Proteobacteria,1S93P@1236|Gammaproteobacteria,3ZMEV@590|Salmonella	1236|Gammaproteobacteria
g130	group_5597		Uncharacterized protein YfcL	hit	S	YfcL protein	yfcL	GO:0005575,GO:0005622,GO:0005623,GO:0005737,GO:0005829,GO:0044424,GO:0044444,GO:0044464	group_5597	220341.16503604	4.94e-58	179.0	2CJ8F@1|root,32SAV@2|Bacteria,1N0DT@1224|Proteobacteria,1S9BA@1236|Gammaproteobacteria,3ZMI5@590|Salmonella	1236|Gammaproteobacteria
g131	yahO	yahO	DUF1471 domain-containing protein	hit	S	Protein of unknown function (DUF1471)	yahO	GO:0008150,GO:0009314,GO:0009628,GO:0050896	yahO	220341.16501635	4.07e-57	177.0	2DN1T@1|root,32V0M@2|Bacteria,1N47F@1224|Proteobacteria,1SAJT@1236|Gammaproteobacteria,3ZMGY@590|Salmonella	1236|Gammaproteobacteria
g132	yggX	yggX	oxidative damage protection protein	hit	C	Could be a mediator in iron transactions between iron acquisition and iron-requiring processes, such as synthesis and or repair of Fe-S clusters in biosynthetic enzymes	yggX	GO:0005575,GO:0005622,GO:0005623,GO:0005737,GO:0005829,GO:0006950,GO:0006979,GO:0008150,GO:0009987,GO:0033554,GO:0034599,GO:0042221,GO:0044424,GO:0044444,GO:0044464,GO:0050896,GO:0051716,GO:0070887	yggX	1197719.A464_3133	1.11e-63	194.0	COG2924@1|root,COG2924@2|Bacteria,1MZ2V@1224|Proteobacteria,1S964@1236|Gammaproteobacteria,3ZMI7@590|Salmonella	1236|Gammaproteobacteria
g133	rpoZ	rpoZ	DNA-directed RNA polymerase subunit omega	hit	K	Promotes RNA polymerase assembly. Latches the N- and C- terminal regions of the beta' subunit thereby facilitating its interaction with the beta and alpha subunits	rpoZ	GO:0003674,GO:0003824,GO:0003899,GO:0005575,GO:0005622,GO:0005623,GO:0005737,GO:0005829,GO:0006139,GO:0006351,GO:0006725,GO:0006807,GO:0008150,GO:0008152,GO:0009058,GO:0009059,GO:0009987,GO:0010467,GO:0016070,GO:0016740,GO:0016772,GO:0016779,GO:0018130,GO:0019438,GO:0030880,GO:0032774,GO:0032991,GO:0034062,GO:0034641,GO:0034645,GO:0034654,GO:0043170,GO:0044237,GO:0044238,GO:0044249,GO:0044260,GO:…	rpoZ	1005994.GTGU_03944	1.87e-53	168.0	COG1758@1|root,COG1758@2|Bacteria,1N6TX@1224|Proteobacteria,1SCSR@1236|Gammaproteobacteria	1236|Gammaproteobacteria
g134	rpsS	rpsS	30S ribosomal protein S19	hit	J	Protein S19 forms a complex with S13 that binds strongly to the 16S ribosomal RNA	rpsS	GO:0000028,GO:0003674,GO:0003735,GO:0005198,GO:0005575,GO:0005622,GO:0005623,GO:0005737,GO:0005829,GO:0005840,GO:0006412,GO:0006518,GO:0006807,GO:0006996,GO:0008150,GO:0008152,GO:0009058,GO:0009059,GO:0009987,GO:0010467,GO:0015935,GO:0016043,GO:0019538,GO:0022607,GO:0022613,GO:0022618,GO:0022626,GO:0022627,GO:0032991,GO:0034622,GO:0034641,GO:0034645,GO:0042254,GO:0042255,GO:0042274,GO:0043043,GO:…	rpsS	1005994.GTGU_03020	1.64e-61	188.0	COG0185@1|root,COG0185@2|Bacteria,1RGYX@1224|Proteobacteria,1S5VT@1236|Gammaproteobacteria	1236|Gammaproteobacteria
g135	yeaC	yeaC	DUF1315 domain-containing protein	hit	S	Protein of unknown function (DUF1315)	yeaC	-	yeaC	220341.16502899	2.73e-60	185.0	COG3139@1|root,COG3139@2|Bacteria,1N6T3@1224|Proteobacteria,1SCFV@1236|Gammaproteobacteria,3ZMGU@590|Salmonella	1236|Gammaproteobacteria
g136	ychH	ychH	stress-induced protein YchH	hit	S	Protein of unknown function (DUF2583)	ychH	GO:0000302,GO:0006950,GO:0006979,GO:0008150,GO:0009636,GO:0009987,GO:0010035,GO:0010038,GO:0033554,GO:0034599,GO:0034614,GO:0035690,GO:0042221,GO:0042493,GO:0042542,GO:0042710,GO:0044010,GO:0044011,GO:0044764,GO:0046677,GO:0046686,GO:0050896,GO:0051703,GO:0051704,GO:0051716,GO:0070301,GO:0070887,GO:0071236,GO:0071241,GO:0071248,GO:0071276,GO:0090605,GO:0090609,GO:0097237,GO:1901700,GO:1901701	ychH	90371.CY43_09105	8.13e-62	189.0	2DB54@1|root,32TWR@2|Bacteria,1MZI6@1224|Proteobacteria,1S8Y3@1236|Gammaproteobacteria,3ZMI8@590|Salmonella	1236|Gammaproteobacteria
g137	yccX	yccX	acylphosphatase	hit	C	Acylphosphatase	acyP	GO:0003674,GO:0003824,GO:0003998,GO:0006950,GO:0008150,GO:0009266,GO:0009408,GO:0009628,GO:0016787,GO:0016817,GO:0016818,GO:0050896	yccX	220341.16502258	9.07e-64	194.0	COG1254@1|root,COG1254@2|Bacteria,1N6NU@1224|Proteobacteria,1SCPF@1236|Gammaproteobacteria,3ZMGG@590|Salmonella	1236|Gammaproteobacteria
g138	ppiC	ppiC	peptidylprolyl isomerase PpiC	hit	O	PPIC-type PPIASE domain	ppiC	GO:0000413,GO:0003674,GO:0003755,GO:0003824,GO:0005575,GO:0005622,GO:0005623,GO:0005737,GO:0006464,GO:0006807,GO:0008150,GO:0008152,GO:0009987,GO:0016853,GO:0016859,GO:0018193,GO:0018208,GO:0019538,GO:0036211,GO:0043170,GO:0043412,GO:0044237,GO:0044238,GO:0044260,GO:0044267,GO:0044424,GO:0044464,GO:0071704,GO:0140096,GO:1901564	ppiC	220341.16504525	5.28e-61	187.0	COG0760@1|root,COG0760@2|Bacteria,1MZDK@1224|Proteobacteria,1S9DN@1236|Gammaproteobacteria,3ZMES@590|Salmonella	1236|Gammaproteobacteria
g139	ybgE	ybgE	cyd operon protein YbgE	hit	S	Cyd operon protein YbgE (Cyd_oper_YbgE)	ybgE	-	ybgE	90371.CY43_04015	1.83e-63	193.0	COG3790@1|root,COG3790@2|Bacteria,1MZDH@1224|Proteobacteria,1SA3Q@1236|Gammaproteobacteria,3ZMHH@590|Salmonella	1236|Gammaproteobacteria
g140	ihfB	ihfB	integration host factor subunit beta	hit	K	This protein is one of the two subunits of integration host factor, a specific DNA-binding protein that functions in genetic recombination as well as in transcriptional and translational control	himD	GO:0003674,GO:0003676,GO:0003677,GO:0005488,GO:0005575,GO:0005622,GO:0005623,GO:0005737,GO:0005829,GO:0006139,GO:0006351,GO:0006725,GO:0006807,GO:0008150,GO:0008152,GO:0009058,GO:0009059,GO:0009889,GO:0009987,GO:0010467,GO:0010556,GO:0016070,GO:0018130,GO:0019219,GO:0019222,GO:0019438,GO:0031323,GO:0031326,GO:0032774,GO:0034641,GO:0034645,GO:0034654,GO:0043170,GO:0044237,GO:0044238,GO:0044249,GO:…	ihfB	1197719.A464_909	2.8e-63	193.0	COG0776@1|root,COG0776@2|Bacteria,1MZ7M@1224|Proteobacteria,1S8XZ@1236|Gammaproteobacteria,3ZMFG@590|Salmonella	1236|Gammaproteobacteria
g141	yfcZ	yfcZ	DUF406 domain-containing protein	hit	S	Protein of unknown function (DUF406)	yfcZ	GO:0005575,GO:0005622,GO:0005623,GO:0005737,GO:0005829,GO:0044424,GO:0044444,GO:0044464	yfcZ	220341.16503613	1.34e-61	189.0	COG3691@1|root,COG3691@2|Bacteria,1N0DI@1224|Proteobacteria,1S91T@1236|Gammaproteobacteria,3ZMGB@590|Salmonella	1236|Gammaproteobacteria
g142	group_5553	relE	type II toxin-antitoxin system mRNA interferase toxin RelE/StbE family	hit	DJ	ParE toxin of type II toxin-antitoxin system, parDE	relE	-	group_5553	220341.16505558	8.04e-63	192.0	COG2026@1|root,COG2026@2|Bacteria,1MZ76@1224|Proteobacteria,1S8RR@1236|Gammaproteobacteria,3ZNAB@590|Salmonella	1236|Gammaproteobacteria
g143	tusB	tusB	sulfurtransferase complex subunit TusB	hit	J	Part of a sulfur-relay system required for 2-thiolation of 5-methylaminomethyl-2-thiouridine (mnm(5)s(2)U) at tRNA wobble positions	tusB	GO:0002097,GO:0002098,GO:0002143,GO:0005575,GO:0005622,GO:0005623,GO:0005737,GO:0005829,GO:0006139,GO:0006396,GO:0006399,GO:0006400,GO:0006725,GO:0006807,GO:0008033,GO:0008150,GO:0008152,GO:0009451,GO:0009987,GO:0010467,GO:0016070,GO:0032991,GO:0034227,GO:0034470,GO:0034641,GO:0034660,GO:0043170,GO:0043412,GO:0044237,GO:0044238,GO:0044424,GO:0044444,GO:0044445,GO:0044464,GO:0046483,GO:0071704,GO:…	tusB	90371.CY43_17940	8.33e-61	187.0	COG2168@1|root,COG2168@2|Bacteria,1NGF3@1224|Proteobacteria,1SGPI@1236|Gammaproteobacteria,3ZMFP@590|Salmonella	1236|Gammaproteobacteria
g144	group_5534		DUF2623 domain-containing protein	hit	S	Protein of unknown function (DUF2623)	yghW	GO:0001101,GO:0008150,GO:0010033,GO:0042221,GO:0050896,GO:0097305,GO:1901422,GO:1901700	group_5534	220341.16504231	1.88e-66	201.0	2CFWY@1|root,31RXH@2|Bacteria,1RHHT@1224|Proteobacteria,1S71B@1236|Gammaproteobacteria,3ZMFX@590|Salmonella	1236|Gammaproteobacteria
g145	group_5533	rpoN	RNA polymerase factor sigma-54	hit	J	Sigma 54 modulation protein / S30EA ribosomal protein	yhbH	GO:0003674,GO:0005488,GO:0005575,GO:0005622,GO:0005623,GO:0005737,GO:0005829,GO:0005840,GO:0006417,GO:0006448,GO:0008150,GO:0009889,GO:0009890,GO:0009892,GO:0010468,GO:0010556,GO:0010558,GO:0010605,GO:0010608,GO:0010629,GO:0015935,GO:0017148,GO:0019222,GO:0022626,GO:0022627,GO:0031323,GO:0031324,GO:0031326,GO:0031327,GO:0032268,GO:0032269,GO:0032991,GO:0034248,GO:0034249,GO:0043021,GO:0043022,GO:…	group_5533	1197719.A464_3402	3.52e-62	190.0	COG1544@1|root,COG1544@2|Bacteria,1MZHW@1224|Proteobacteria,1S8U1@1236|Gammaproteobacteria,3ZMGI@590|Salmonella	1236|Gammaproteobacteria
g146	eutN	eutN	ethanolamine utilization microcompartment protein EutN	hit	CQ	Ethanolamine utilisation protein EutN/carboxysome	eutN	GO:0006950,GO:0006974,GO:0008150,GO:0009987,GO:0033554,GO:0050896,GO:0051716	eutN	220341.16503681	7.15e-60	189.0	COG4576@1|root,COG4577@1|root,COG4576@2|Bacteria,COG4577@2|Bacteria,1RIK4@1224|Proteobacteria,1S6GW@1236|Gammaproteobacteria,3ZNAY@590|Salmonella	1236|Gammaproteobacteria
g147	yceK	yceK	YceK/YidQ family lipoprotein	hit	S	Protein of unknown function (DUF1375)	yidQ	GO:0006950,GO:0006974,GO:0008150,GO:0009987,GO:0033554,GO:0050896,GO:0051716	yceK	220341.16504817	1.05e-62	192.0	COG5645@1|root,COG5645@2|Bacteria,1MZ8R@1224|Proteobacteria,1S9TX@1236|Gammaproteobacteria,3ZMCU@590|Salmonella	1236|Gammaproteobacteria
g148	group_5518	ilvN	acetolactate synthase small subunit	hit	E	ACT domain	ilvN	GO:0003674,GO:0003824,GO:0003984,GO:0005575,GO:0005622,GO:0005623,GO:0005737,GO:0005829,GO:0005948,GO:0006082,GO:0006520,GO:0006549,GO:0006573,GO:0006807,GO:0008150,GO:0008152,GO:0008652,GO:0009058,GO:0009081,GO:0009082,GO:0009097,GO:0009099,GO:0009987,GO:0016053,GO:0016740,GO:0016744,GO:0019752,GO:0032991,GO:0043436,GO:0044237,GO:0044238,GO:0044249,GO:0044281,GO:0044283,GO:0044424,GO:0044444,GO:…	group_5518	220341.16504830	1.95e-64	196.0	COG0440@1|root,COG0440@2|Bacteria,1N065@1224|Proteobacteria,1S73I@1236|Gammaproteobacteria,3ZMHT@590|Salmonella	1236|Gammaproteobacteria
g149	group_5517		DUF1418 domain-containing protein	hit	S	Protein of unknown function (DUF1418)	ybjC	-	group_5517	220341.16502076	1.38e-55	174.0	2E45I@1|root,32Z1J@2|Bacteria,1NB1Y@1224|Proteobacteria,1SCQF@1236|Gammaproteobacteria,3ZME9@590|Salmonella	1236|Gammaproteobacteria
g150	group_5516		UPF0235 protein YggU	hit	S	Uncharacterised ACR, YggU family COG1872	yggU	-	group_5516	1197719.A464_3124	9.3e-63	192.0	COG1872@1|root,COG1872@2|Bacteria,1MZ4E@1224|Proteobacteria,1S9AB@1236|Gammaproteobacteria,3ZMEK@590|Salmonella	1236|Gammaproteobacteria
g151	group_5515	yiaG	transcriptional regulator	hit	K	transcriptional regulator	-	-	group_5515	90371.CY43_21080	1.55e-61	189.0	COG2944@1|root,COG2944@2|Bacteria,1MZGM@1224|Proteobacteria,1S97H@1236|Gammaproteobacteria	1236|Gammaproteobacteria
g152	yfjF	yfjF	RnfH family protein	hit	S	RnfH family Ubiquitin	rnfH	-	yfjF	90371.CY43_14280	1.49e-59	184.0	COG2914@1|root,COG2914@2|Bacteria,1MZCH@1224|Proteobacteria,1SCHG@1236|Gammaproteobacteria,3ZMH4@590|Salmonella	1236|Gammaproteobacteria
g153	flgM	flgM	anti-sigma-28 factor FlgM	hit	N	Anti-sigma-28 factor, FlgM	flgM	GO:0000988,GO:0000989,GO:0003674,GO:0008150,GO:0009889,GO:0009892,GO:0010556,GO:0010605,GO:0016989,GO:0019219,GO:0019222,GO:0030162,GO:0031323,GO:0031324,GO:0031326,GO:0032268,GO:0032269,GO:0045861,GO:0048519,GO:0048523,GO:0050789,GO:0050794,GO:0051171,GO:0051172,GO:0051246,GO:0051248,GO:0051252,GO:0060255,GO:0065007,GO:0080090,GO:0140110,GO:1903506,GO:2001141	flgM	90371.CY43_05975	4.42e-57	177.0	COG2747@1|root,COG2747@2|Bacteria,1MZI7@1224|Proteobacteria,1S8UX@1236|Gammaproteobacteria,3ZMI3@590|Salmonella	1236|Gammaproteobacteria
g154	ibaG	ibaG	BolA family iron metabolism protein IbaG	hit	K	BolA-like protein	yrbA	GO:0003674,GO:0005488,GO:0005575,GO:0005622,GO:0005623,GO:0005737,GO:0005829,GO:0044424,GO:0044444,GO:0044464,GO:0048037,GO:0051536,GO:0051537,GO:0051540	ibaG	220341.16504373	4.39e-66	200.0	COG5007@1|root,COG5007@2|Bacteria,1N1WJ@1224|Proteobacteria,1SCAR@1236|Gammaproteobacteria,3ZMAR@590|Salmonella	1236|Gammaproteobacteria
g155	groES	groES	Co-chaperonin GroES	hit	O	Binds to Cpn60 in the presence of Mg-ATP and suppresses the ATPase activity of the latter	groS	GO:0003674,GO:0005488,GO:0005515,GO:0005575,GO:0005622,GO:0005623,GO:0005737,GO:0005829,GO:0006457,GO:0006458,GO:0006950,GO:0006986,GO:0008150,GO:0009266,GO:0009408,GO:0009628,GO:0009987,GO:0010033,GO:0016032,GO:0016465,GO:0019058,GO:0019068,GO:0032991,GO:0035966,GO:0042221,GO:0042802,GO:0043167,GO:0043169,GO:0044403,GO:0044419,GO:0044424,GO:0044444,GO:0044445,GO:0044464,GO:0046872,GO:0050896,GO:…	groES	1080067.BAZH01000004_gene3826	9.27e-59	182.0	COG0234@1|root,COG0234@2|Bacteria,1MZ2X@1224|Proteobacteria,1S8YR@1236|Gammaproteobacteria,3WYNM@544|Citrobacter	1236|Gammaproteobacteria
g156	ybfE	ybfE	LexA regulated protein	hit	S	Ribbon-helix-helix protein, copG family	ybfE	GO:0006950,GO:0006974,GO:0008150,GO:0009987,GO:0033554,GO:0050896,GO:0051716	ybfE	1197719.A464_656	1.32e-58	181.0	2DB8J@1|root,32TX0@2|Bacteria,1MZBR@1224|Proteobacteria,1S9W6@1236|Gammaproteobacteria,3ZMH9@590|Salmonella	1236|Gammaproteobacteria
g157	fis	fis	DNA-binding transcriptional regulator Fis	hit	K	Activates ribosomal RNA transcription. Plays a direct role in upstream activation of rRNA promoters	fis	GO:0000018,GO:0000229,GO:0000785,GO:0000786,GO:0000787,GO:0000789,GO:0000976,GO:0000984,GO:0000985,GO:0001017,GO:0001046,GO:0001047,GO:0001067,GO:0001121,GO:0001130,GO:0001131,GO:0001140,GO:0001216,GO:0001217,GO:0003674,GO:0003676,GO:0003677,GO:0003690,GO:0003700,GO:0005488,GO:0005515,GO:0005575,GO:0005622,GO:0005623,GO:0005694,GO:0005737,GO:0005829,GO:0006139,GO:0006351,GO:0006355,GO:0006725,GO:…	fis	1005994.GTGU_03789	1.79e-61	189.0	COG2901@1|root,COG2901@2|Bacteria,1N7MJ@1224|Proteobacteria,1SD35@1236|Gammaproteobacteria	1236|Gammaproteobacteria
g158	mlaB	mlaB	lipid asymmetry maintenance protein MlaB	hit	S	STAS domain	mlaB	GO:0003674,GO:0003824,GO:0005575,GO:0005622,GO:0005623,GO:0005737,GO:0005829,GO:0006950,GO:0006974,GO:0008150,GO:0009987,GO:0016462,GO:0016787,GO:0016817,GO:0016818,GO:0016887,GO:0017111,GO:0033554,GO:0042221,GO:0044424,GO:0044444,GO:0044464,GO:0046677,GO:0050896,GO:0051716	mlaB	220341.16504374	3.09e-62	191.0	COG3113@1|root,COG3113@2|Bacteria,1NGIE@1224|Proteobacteria,1SD2Q@1236|Gammaproteobacteria,3ZMHP@590|Salmonella	1236|Gammaproteobacteria
g159	group_5485		Membrane fusogenic activity	hit	S	Membrane fusogenic activity	yqiC	GO:0005575,GO:0005622,GO:0005623,GO:0005737,GO:0005829,GO:0044424,GO:0044444,GO:0044464	group_5485	1197719.A464_3228	8.2e-58	179.0	COG2960@1|root,COG2960@2|Bacteria,1N7AH@1224|Proteobacteria,1SCH1@1236|Gammaproteobacteria,3ZMG9@590|Salmonella	1236|Gammaproteobacteria
g160	group_5483		citrate lyase acyl carrier protein 1	hit	C	Covalent carrier of the coenzyme of citrate lyase	citD	GO:0003674,GO:0005488,GO:0005575,GO:0005622,GO:0005623,GO:0005737,GO:0044424,GO:0044464,GO:0048037,GO:0051192	group_5483	220341.16501875	2.54e-61	188.0	COG3052@1|root,COG3052@2|Bacteria,1N20F@1224|Proteobacteria,1S98D@1236|Gammaproteobacteria,3ZMHY@590|Salmonella	1236|Gammaproteobacteria
g161	tktA2	;tktA2	Transketolase C-terminal section;transketolase	hit	G	Transketolase, pyrimidine binding domain	-	-	tktA2	220341.16503564	2.12e-224	619.0	COG3958@1|root,COG3958@2|Bacteria,1N6QF@1224|Proteobacteria,1RYXD@1236|Gammaproteobacteria,3ZKC3@590|Salmonella	1236|Gammaproteobacteria
g162	group_5408		YqjK-like protein	hit	S	YqjK-like protein	yqjK	GO:0005575,GO:0005622,GO:0005623,GO:0005737,GO:0005829,GO:0044424,GO:0044444,GO:0044464	group_5408	220341.16504306	8.46e-65	197.0	2E52J@1|root,32ZVT@2|Bacteria,1N7E9@1224|Proteobacteria,1SCW7@1236|Gammaproteobacteria,3ZMHA@590|Salmonella	1236|Gammaproteobacteria
g163	group_5403		Integration host factor subunit alpha	hit	K	This protein is one of the two subunits of integration host factor, a specific DNA-binding protein that functions in genetic recombination as well as in transcriptional and translational control	himA	GO:0000976,GO:0001067,GO:0001130,GO:0001216,GO:0001217,GO:0003674,GO:0003676,GO:0003677,GO:0003690,GO:0003700,GO:0005488,GO:0005575,GO:0005622,GO:0005623,GO:0005737,GO:0005829,GO:0006139,GO:0006351,GO:0006355,GO:0006725,GO:0006807,GO:0008150,GO:0008152,GO:0009058,GO:0009059,GO:0009889,GO:0009890,GO:0009891,GO:0009892,GO:0009893,GO:0009987,GO:0010467,GO:0010468,GO:0010556,GO:0010557,GO:0010558,GO:…	group_5403	1115512.EH105704_01_00620	1.2e-64	197.0	COG0776@1|root,COG0776@2|Bacteria,1RH5Z@1224|Proteobacteria,1S61Z@1236|Gammaproteobacteria,3XPVF@561|Escherichia	1236|Gammaproteobacteria
g164	rplW	rplW	50S ribosomal protein L23	hit	J	One of the early assembly proteins it binds 23S rRNA. One of the proteins that surrounds the polypeptide exit tunnel on the outside of the ribosome. Forms the main docking site for trigger factor binding to the ribosome	rplW	GO:0000027,GO:0003674,GO:0003676,GO:0003723,GO:0003735,GO:0005198,GO:0005488,GO:0005575,GO:0005622,GO:0005623,GO:0005737,GO:0005829,GO:0005840,GO:0006412,GO:0006518,GO:0006807,GO:0006996,GO:0008150,GO:0008152,GO:0009058,GO:0009059,GO:0009987,GO:0010467,GO:0015934,GO:0016043,GO:0019538,GO:0022607,GO:0022613,GO:0022618,GO:0022625,GO:0022626,GO:0032991,GO:0034622,GO:0034641,GO:0034645,GO:0042254,GO:…	rplW	1028307.EAE_04945	2.07e-61	189.0	COG0089@1|root,COG0089@2|Bacteria,1MZXX@1224|Proteobacteria,1S8VX@1236|Gammaproteobacteria,3X2J0@547|Enterobacter	1236|Gammaproteobacteria
g165	nuoK	nuoK	NADH-quinone oxidoreductase subunit NuoK	hit	C	NDH-1 shuttles electrons from NADH, via FMN and iron- sulfur (Fe-S) centers, to quinones in the respiratory chain. The immediate electron acceptor for the enzyme in this species is believed to be ubiquinone. Couples the redox reaction to proton translocation (for every two electrons transferred, four hydrogen ions are translocated across the cytoplasmic membrane), and thus conserves the redox ene…	nuoK	GO:0003674,GO:0003824,GO:0003954,GO:0005575,GO:0005623,GO:0005886,GO:0005887,GO:0008137,GO:0008150,GO:0008152,GO:0016020,GO:0016021,GO:0016491,GO:0016651,GO:0016655,GO:0030964,GO:0031224,GO:0031226,GO:0032991,GO:0044425,GO:0044459,GO:0044464,GO:0045271,GO:0045272,GO:0050136,GO:0055114,GO:0070469,GO:0070470,GO:0071944,GO:0098796,GO:0098797,GO:0098803,GO:1902494,GO:1990204	nuoK	220341.16503543	5.49e-57	177.0	COG0713@1|root,COG0713@2|Bacteria,1RH0S@1224|Proteobacteria,1S6FN@1236|Gammaproteobacteria,3ZME8@590|Salmonella	1236|Gammaproteobacteria
g166	group_5236		DUF1161 domain-containing protein	hit	S	Protein of unknown function (DUF1161)	ynfD	-	group_5236	90371.CY43_07640	2.31e-63	194.0	2CTGV@1|root,32STG@2|Bacteria,1N0CU@1224|Proteobacteria,1S9NS@1236|Gammaproteobacteria,3ZMH0@590|Salmonella	1236|Gammaproteobacteria
g167	group_5151		DUF2755 domain-containing protein	hit	S	Protein of unknown function (DUF2755)	yaiY	GO:0005575,GO:0005623,GO:0005886,GO:0016020,GO:0044464,GO:0071944	group_5151	220341.16501647	4.11e-71	213.0	2CHSJ@1|root,32S6F@2|Bacteria,1MZ02@1224|Proteobacteria,1S9IH@1236|Gammaproteobacteria,3ZMDA@590|Salmonella	1236|Gammaproteobacteria
g168	atl1	atl1	6-O-methylguanine DNA methyltransferase	hit	H	6-O-methylguanine DNA methyltransferase, DNA binding domain	ybaZ	GO:0003674,GO:0003676,GO:0003677,GO:0003684,GO:0005488,GO:0005515,GO:0019899,GO:0097159,GO:1901363	atl1	220341.16501738	2.95e-70	212.0	COG3695@1|root,COG3695@2|Bacteria,1N7J2@1224|Proteobacteria,1SCIZ@1236|Gammaproteobacteria,3ZM5Y@590|Salmonella	1236|Gammaproteobacteria
g169	drpB	drpB	cell division protein DrpB	hit	-	-	yedR	GO:0005575,GO:0005623,GO:0005886,GO:0016020,GO:0044464,GO:0071944	drpB	220341.16503233	2.66e-72	216.0	2DZQZ@1|root,32VGN@2|Bacteria,1N08R@1224|Proteobacteria,1SA7X@1236|Gammaproteobacteria,3ZMK0@590|Salmonella	1236|Gammaproteobacteria
g170	rpsJ_V57L	rpsJ_V57L	30S ribosomal protein S10	hit	J	Involved in the binding of tRNA to the ribosomes	rpsJ	GO:0003674,GO:0003735,GO:0005198,GO:0005575,GO:0005622,GO:0005623,GO:0005737,GO:0005840,GO:0006412,GO:0006518,GO:0006807,GO:0008150,GO:0008152,GO:0009058,GO:0009059,GO:0009987,GO:0010467,GO:0015935,GO:0019538,GO:0032991,GO:0034641,GO:0034645,GO:0043043,GO:0043170,GO:0043226,GO:0043228,GO:0043229,GO:0043232,GO:0043603,GO:0043604,GO:0044237,GO:0044238,GO:0044249,GO:0044260,GO:0044267,GO:0044271,GO:…	rpsJ_V57L	1005058.UMN179_01159	3.38e-66	201.0	COG0051@1|root,COG0051@2|Bacteria,1RGWF@1224|Proteobacteria,1S3QX@1236|Gammaproteobacteria,1Y8M8@135625|Pasteurellales	135625|Pasteurellales
g171	rplU	rplU	50S ribosomal protein L21	hit	J	This protein binds to 23S rRNA in the presence of protein L20	rplU	GO:0003674,GO:0003735,GO:0005198,GO:0005575,GO:0005622,GO:0005623,GO:0005737,GO:0005829,GO:0005840,GO:0006412,GO:0006518,GO:0006807,GO:0008150,GO:0008152,GO:0009058,GO:0009059,GO:0009987,GO:0010467,GO:0015934,GO:0019538,GO:0022625,GO:0022626,GO:0032991,GO:0034641,GO:0034645,GO:0043043,GO:0043170,GO:0043226,GO:0043228,GO:0043229,GO:0043232,GO:0043603,GO:0043604,GO:0044237,GO:0044238,GO:0044249,GO:…	rplU	1197719.A464_3385	2.03e-67	204.0	COG0261@1|root,COG0261@2|Bacteria,1MZEW@1224|Proteobacteria,1S5VB@1236|Gammaproteobacteria,3ZMBI@590|Salmonella	1236|Gammaproteobacteria
g172	ftsB	ftsB	cell division protein FtsB	hit	D	Essential cell division protein. May link together the upstream cell division proteins, which are predominantly cytoplasmic, with the downstream cell division proteins, which are predominantly periplasmic	ftsB	GO:0000003,GO:0000910,GO:0003674,GO:0005488,GO:0005515,GO:0005575,GO:0005623,GO:0007049,GO:0008150,GO:0009987,GO:0019954,GO:0022402,GO:0022414,GO:0030428,GO:0032153,GO:0032505,GO:0042802,GO:0043093,GO:0044464,GO:0051301	ftsB	220341.16504004	2.47e-68	206.0	COG2919@1|root,COG2919@2|Bacteria,1N7AA@1224|Proteobacteria,1SD8H@1236|Gammaproteobacteria,3ZMAE@590|Salmonella	1236|Gammaproteobacteria
g173	group_5061		Type II toxin-antitoxin system RelE/ParE family toxin	hit	S	Cytotoxic translational repressor of toxin-antitoxin stability system	-	-	group_5061	90371.CY43_21075	6.29e-71	213.0	COG4737@1|root,COG4737@2|Bacteria,1N7N5@1224|Proteobacteria,1S6BG@1236|Gammaproteobacteria	1236|Gammaproteobacteria
g174	fliE	fliE	flagellar hook-basal body complex protein FliE	hit	N	Flagellar hook-basal body complex protein FliE	fliE	-	fliE	90371.CY43_10365	4.6e-60	186.0	COG1677@1|root,COG1677@2|Bacteria,1N6RZ@1224|Proteobacteria,1SD52@1236|Gammaproteobacteria,3ZMHN@590|Salmonella	1236|Gammaproteobacteria
g175	rplX	rplX	50S ribosomal protein L24	hit	J	One of the proteins that surrounds the polypeptide exit tunnel on the outside of the subunit	rplX	GO:0000027,GO:0003674,GO:0003735,GO:0005198,GO:0005575,GO:0005622,GO:0005623,GO:0005737,GO:0005829,GO:0005840,GO:0006412,GO:0006518,GO:0006807,GO:0006996,GO:0008150,GO:0008152,GO:0009058,GO:0009059,GO:0009987,GO:0010467,GO:0015934,GO:0016043,GO:0019538,GO:0022607,GO:0022613,GO:0022618,GO:0022625,GO:0022626,GO:0032991,GO:0034622,GO:0034641,GO:0034645,GO:0042254,GO:0042255,GO:0042273,GO:0043043,GO:…	rplX	1045856.EcWSU1_04111	1.04e-65	200.0	COG0198@1|root,COG0198@2|Bacteria,1MZQD@1224|Proteobacteria,1S973@1236|Gammaproteobacteria,3X2E6@547|Enterobacter	1236|Gammaproteobacteria
g176	bolA	bolA	transcriptional regulator BolA	hit	T	BolA-like protein	bolA	GO:0005575,GO:0005622,GO:0005623,GO:0005737,GO:0005829,GO:0006139,GO:0006351,GO:0006725,GO:0006807,GO:0008150,GO:0008152,GO:0008360,GO:0009058,GO:0009059,GO:0009987,GO:0010467,GO:0016070,GO:0018130,GO:0019438,GO:0022603,GO:0022604,GO:0032774,GO:0034641,GO:0034645,GO:0034654,GO:0043170,GO:0044237,GO:0044238,GO:0044249,GO:0044260,GO:0044271,GO:0044424,GO:0044444,GO:0044464,GO:0046483,GO:0050789,GO:…	bolA	1197719.A464_398	1.41e-70	212.0	COG0271@1|root,COG0271@2|Bacteria,1MZG5@1224|Proteobacteria,1S91G@1236|Gammaproteobacteria,3ZMBA@590|Salmonella	1236|Gammaproteobacteria
g177	rhaM	rhaM	L-rhamnose mutarotase	hit	G	Involved in the anomeric conversion of L-rhamnose	rhaM	GO:0003674,GO:0003824,GO:0005975,GO:0005996,GO:0008150,GO:0008152,GO:0009056,GO:0016052,GO:0016853,GO:0016854,GO:0016857,GO:0019299,GO:0019301,GO:0019318,GO:0019320,GO:0044238,GO:0044281,GO:0044282,GO:0046365,GO:0071704,GO:1901575	rhaM	220341.16504693	1.22e-71	215.0	COG3254@1|root,COG3254@2|Bacteria,1RGYV@1224|Proteobacteria,1S6AI@1236|Gammaproteobacteria,3ZMBB@590|Salmonella	1236|Gammaproteobacteria
g178	hdfR	hdfR;	HTH-type transcriptional regulator HdfR;HTH-type transcriptional regulator gltR	hit	K	Negatively regulates the transcription of the flagellar master operon flhDC by binding to the upstream region of the operon	hdfR	GO:0003674,GO:0003700,GO:0006355,GO:0008150,GO:0009889,GO:0009890,GO:0009892,GO:0010468,GO:0010556,GO:0010558,GO:0010605,GO:0010629,GO:0019219,GO:0019222,GO:0031323,GO:0031324,GO:0031326,GO:0031327,GO:0045892,GO:0045934,GO:0048519,GO:0048523,GO:0050789,GO:0050794,GO:0051171,GO:0051172,GO:0051252,GO:0051253,GO:0060255,GO:0065007,GO:0080090,GO:0140110,GO:1902679,GO:1903506,GO:1903507,GO:2000112,GO:…	hdfR	220341.16504584	1.69e-198	551.0	COG0583@1|root,COG0583@2|Bacteria,1MXXA@1224|Proteobacteria,1RREE@1236|Gammaproteobacteria,3ZJPC@590|Salmonella	1236|Gammaproteobacteria
g179	sugE	sugE	quaternary ammonium compound efflux SMR transporter SugE	hit	U	confers resistance to cetylpyridinium, cetyldimethylethyl ammonium and cetrimide cations	sugE	GO:0005575,GO:0005623,GO:0005886,GO:0005887,GO:0006810,GO:0008150,GO:0015893,GO:0016020,GO:0016021,GO:0031224,GO:0031226,GO:0042221,GO:0042493,GO:0044425,GO:0044459,GO:0044464,GO:0046618,GO:0050896,GO:0051179,GO:0051234,GO:0055085,GO:0071944	sugE	220341.16505468	4.4e-63	193.0	COG2076@1|root,COG2076@2|Bacteria,1MZ6P@1224|Proteobacteria,1S8TD@1236|Gammaproteobacteria,3ZMFK@590|Salmonella	1236|Gammaproteobacteria
g180	hspQ	hspQ	heat shock protein HspQ	hit	S	Involved in the degradation of certain denaturated proteins, including DnaA, during heat shock stress	hspQ	-	hspQ	1197719.A464_955	7.28e-71	213.0	COG3785@1|root,COG3785@2|Bacteria,1RGWN@1224|Proteobacteria,1S62D@1236|Gammaproteobacteria,3ZMB5@590|Salmonella	1236|Gammaproteobacteria
g181	yhbQ	yhbQ	UPF0213 protein YhbQ	hit	L	GIY-YIG catalytic domain	yhbQ	GO:0003674,GO:0003824,GO:0004518,GO:0004519,GO:0004520,GO:0004527,GO:0004529,GO:0004536,GO:0006139,GO:0006259,GO:0006725,GO:0006807,GO:0008150,GO:0008152,GO:0008296,GO:0008408,GO:0009987,GO:0016787,GO:0016788,GO:0016796,GO:0016895,GO:0034641,GO:0043170,GO:0044237,GO:0044238,GO:0044260,GO:0046483,GO:0071704,GO:0090304,GO:0090305,GO:0140097,GO:1901360	yhbQ	220341.16504341	2.75e-66	201.0	COG2827@1|root,COG2827@2|Bacteria,1N6PA@1224|Proteobacteria,1SCBH@1236|Gammaproteobacteria,3ZM9Y@590|Salmonella	1236|Gammaproteobacteria
g182	group_4920		nucleoside hydrolase	hit	F	Hydrolyzes cytidine or uridine to ribose and cytosine or uracil, respectively	rihA	GO:0003674,GO:0003824,GO:0005488,GO:0005509,GO:0005575,GO:0005622,GO:0005623,GO:0005737,GO:0005829,GO:0006139,GO:0006152,GO:0006213,GO:0006725,GO:0006807,GO:0008150,GO:0008152,GO:0008477,GO:0009056,GO:0009116,GO:0009119,GO:0009164,GO:0009987,GO:0016787,GO:0016798,GO:0016799,GO:0019439,GO:0034641,GO:0034655,GO:0034656,GO:0042278,GO:0042454,GO:0043167,GO:0043169,GO:0044237,GO:0044238,GO:0044248,GO:…	group_4920	220341.16501905	3.07e-64	203.0	COG1957@1|root,COG1957@2|Bacteria,1MUIW@1224|Proteobacteria,1RSCY@1236|Gammaproteobacteria,3ZJUT@590|Salmonella	1236|Gammaproteobacteria
g183	ymdA	ymdA	Uncharacterized protein YmdA	hit	-	-	-	-	ymdA	220341.16502317	3.74e-69	209.0	2BIAD@1|root,32CG0@2|Bacteria,1QQXZ@1224|Proteobacteria,1RTNN@1236|Gammaproteobacteria,3ZNFA@590|Salmonella	1236|Gammaproteobacteria
g184	cyaY	cyaY	iron donor protein CyaY	hit	P	Frataxin-like domain	cyaY	GO:0003674,GO:0003824,GO:0004322,GO:0005488,GO:0005506,GO:0005575,GO:0005622,GO:0005623,GO:0005737,GO:0005829,GO:0006464,GO:0006790,GO:0006807,GO:0006873,GO:0006875,GO:0006879,GO:0006950,GO:0006979,GO:0008150,GO:0008152,GO:0008198,GO:0008199,GO:0009987,GO:0016043,GO:0016226,GO:0016491,GO:0016530,GO:0016722,GO:0016724,GO:0018282,GO:0018283,GO:0019538,GO:0019725,GO:0022607,GO:0030003,GO:0031163,GO:…	cyaY	220341.16504495	1.51e-77	230.0	COG1965@1|root,COG1965@2|Bacteria,1RH9A@1224|Proteobacteria,1S5UP@1236|Gammaproteobacteria,3ZMD0@590|Salmonella	1236|Gammaproteobacteria
g185	iscA	iscA	iron-sulfur cluster assembly protein IscA	hit	C	Iron-sulphur cluster biosynthesis	iscA	GO:0003674,GO:0005488,GO:0005506,GO:0005575,GO:0005622,GO:0005623,GO:0005737,GO:0005829,GO:0006790,GO:0006807,GO:0008150,GO:0008152,GO:0008198,GO:0009987,GO:0010467,GO:0016043,GO:0016226,GO:0016530,GO:0019538,GO:0022607,GO:0031163,GO:0034986,GO:0043167,GO:0043169,GO:0043170,GO:0044085,GO:0044237,GO:0044238,GO:0044424,GO:0044444,GO:0044464,GO:0046872,GO:0046914,GO:0048037,GO:0051186,GO:0051536,GO:…	iscA	1197719.A464_2653	8.76e-73	218.0	COG0316@1|root,COG0316@2|Bacteria,1RH6T@1224|Proteobacteria,1S5XD@1236|Gammaproteobacteria,3ZM9T@590|Salmonella	1236|Gammaproteobacteria
g186	group_4750		DUF3561 domain-containing protein	hit	S	Protein of unknown function (DUF3561)	ygbE	GO:0005575,GO:0005623,GO:0005886,GO:0016020,GO:0044464,GO:0071944	group_4750	220341.16504005	3.19e-66	202.0	2C1QX@1|root,32TB7@2|Bacteria,1MZA3@1224|Proteobacteria,1S97Z@1236|Gammaproteobacteria,3ZMHJ@590|Salmonella	1236|Gammaproteobacteria
g187	group_4749		branched-chain amino acid transport	hit	S	Branched-chain amino acid transport protein (AzlD)	-	-	group_4749	90371.CY43_21125	2.42e-61	189.0	2DMQN@1|root,32T1U@2|Bacteria,1N290@1224|Proteobacteria,1S6JZ@1236|Gammaproteobacteria,3ZMFH@590|Salmonella	1236|Gammaproteobacteria
g188	group_4663	elaB	DUF883 domain-containing protein	hit	S	Bacterial protein of unknown function (DUF883)	ygaM	GO:0005575,GO:0005622,GO:0005623,GO:0005737,GO:0005829,GO:0044424,GO:0044444,GO:0044464	group_4663	220341.16503885	5.26e-70	211.0	COG4575@1|root,COG4575@2|Bacteria,1RI01@1224|Proteobacteria,1S88Q@1236|Gammaproteobacteria,3ZMCI@590|Salmonella	1236|Gammaproteobacteria
g189	group_4662		DUF2502 domain-containing protein	hit	S	Protein of unknown function (DUF2502)	ypeC	-	group_4662	220341.16503632	2.22e-53	169.0	2B58A@1|root,31Y28@2|Bacteria,1RHG1@1224|Proteobacteria,1S60N@1236|Gammaproteobacteria,3ZMBU@590|Salmonella	1236|Gammaproteobacteria
g190	csgC	csgC	curli assembly protein CsgC	hit	M	Thin aggregative fimbriae synthesis protein	csgC	-	csgC	220341.16502316	1.02e-67	205.0	2CHEZ@1|root,32UJP@2|Bacteria,1N2IV@1224|Proteobacteria,1S8D1@1236|Gammaproteobacteria,3ZNAK@590|Salmonella	1236|Gammaproteobacteria
g191	nirD	nirD	nitrite reductase small subunit NirD	hit	P	Rieske-like [2Fe-2S] domain	nirD	GO:0003674,GO:0003824,GO:0005575,GO:0005622,GO:0005623,GO:0005737,GO:0006091,GO:0008150,GO:0008152,GO:0008942,GO:0009061,GO:0009344,GO:0009987,GO:0015980,GO:0016491,GO:0016661,GO:0032991,GO:0044237,GO:0044424,GO:0044464,GO:0045333,GO:0046857,GO:0055114,GO:0098809	nirD	220341.16505116	8.37e-76	226.0	COG2146@1|root,COG2146@2|Bacteria,1MZBY@1224|Proteobacteria,1S9F1@1236|Gammaproteobacteria,3ZMCY@590|Salmonella	1236|Gammaproteobacteria
g192	yciH	yciH	stress response translation initiation inhibitor YciH	hit	J	Translation initiation factor SUI1	yciH	GO:0001731,GO:0002181,GO:0002183,GO:0002188,GO:0002190,GO:0002192,GO:0003674,GO:0003676,GO:0003723,GO:0003729,GO:0003743,GO:0005488,GO:0005575,GO:0005622,GO:0005623,GO:0005737,GO:0006412,GO:0006413,GO:0006518,GO:0006807,GO:0008135,GO:0008150,GO:0008152,GO:0009058,GO:0009059,GO:0009987,GO:0010467,GO:0016043,GO:0019538,GO:0022607,GO:0022613,GO:0022618,GO:0032991,GO:0034622,GO:0034641,GO:0034645,GO:…	yciH	220341.16502468	2.23e-71	214.0	COG0023@1|root,COG0023@2|Bacteria,1MZ8T@1224|Proteobacteria,1S929@1236|Gammaproteobacteria,3ZMBQ@590|Salmonella	1236|Gammaproteobacteria
g193	glpE	glpE	thiosulfate sulfurtransferase GlpE	hit	P	Catalyzes, although with low efficiency, the sulfur transfer reaction from thiosulfate to cyanide	glpE	GO:0003674,GO:0003824,GO:0004792,GO:0005575,GO:0005622,GO:0005623,GO:0005737,GO:0016740,GO:0016782,GO:0016783,GO:0044424,GO:0044464	glpE	220341.16505075	1.45e-76	228.0	COG0607@1|root,COG0607@2|Bacteria,1MZPW@1224|Proteobacteria,1S94C@1236|Gammaproteobacteria,3ZM9V@590|Salmonella	1236|Gammaproteobacteria
g194	yggL	yggL	YggL 50S ribosome-binding protein	hit	S	Protein with unknown function (DUF469)	yggL	GO:0005575,GO:0005622,GO:0005623,GO:0005737,GO:0005829,GO:0044424,GO:0044444,GO:0044464	yggL	220341.16504186	1.69e-75	225.0	COG3171@1|root,COG3171@2|Bacteria,1RH3U@1224|Proteobacteria,1S6UT@1236|Gammaproteobacteria,3ZMD7@590|Salmonella	1236|Gammaproteobacteria
g195	clpS	;clpS	ATP-dependent Clp protease adapter protein ClpS;ATP-dependent Clp protease adapter ClpS;ATP-dependent Clp protease adaptor protein ClpS	hit	E	Involved in the modulation of the specificity of the ClpAP-mediated ATP-dependent protein degradation	clpS	GO:0003674,GO:0005488,GO:0005515,GO:0006950,GO:0008150,GO:0009266,GO:0009408,GO:0009628,GO:0050896,GO:0051087	clpS	220341.16502110	1.65e-68	207.0	COG2127@1|root,COG2127@2|Bacteria,1MZU8@1224|Proteobacteria,1S8Z7@1236|Gammaproteobacteria,3ZMB1@590|Salmonella	1236|Gammaproteobacteria
g196	ybaB	ybaB	YbaB/EbfC family nucleoid-associated protein	hit	S	Binds to DNA and alters its conformation. May be involved in regulation of gene expression, nucleoid organization and DNA protection	ybaB	GO:0003674,GO:0003676,GO:0003677,GO:0005488,GO:0005575,GO:0005622,GO:0005623,GO:0005737,GO:0005829,GO:0044424,GO:0044444,GO:0044464,GO:0097159,GO:1901363	ybaB	1005994.GTGU_01283	1.76e-64	197.0	COG0718@1|root,COG0718@2|Bacteria,1RGZD@1224|Proteobacteria,1S5WU@1236|Gammaproteobacteria	1236|Gammaproteobacteria
g197	yfiM	yfiM	YfiM family lipoprotein	hit	S	Predicted periplasmic lipoprotein (DUF2279)	yfiM	-	yfiM	220341.16503812	3.32e-73	219.0	COG5544@1|root,COG5544@2|Bacteria,1N1EG@1224|Proteobacteria,1S9DQ@1236|Gammaproteobacteria,3ZMCT@590|Salmonella	1236|Gammaproteobacteria
g198	dinP~~~umuC	;dinP;umuC	DNA polymerase V subunit UmuC;Nucleotidyltransferase/DNA polymerase DinP involved in DNA repair;Protein UmuC	hit	L	Domain of unknown function (DUF4113)	umuC	-	dinP~~~umuC	90371.CY43_10505	1e-307	838.0	COG0389@1|root,COG0389@2|Bacteria,1MUUH@1224|Proteobacteria,1RMT1@1236|Gammaproteobacteria,3ZJKZ@590|Salmonella	1236|Gammaproteobacteria
g199	lprI	lprI	LprI domain-containing protein	hit	S	Pfam:DUF1311	-	-	lprI	220341.16502405	1.02e-72	218.0	COG4461@1|root,COG4461@2|Bacteria,1N8A8@1224|Proteobacteria,1SBRD@1236|Gammaproteobacteria,3ZN95@590|Salmonella	1236|Gammaproteobacteria
g200	tusE	tusE	sulfurtransferase TusE	hit	P	Part of a sulfur-relay system	tusE	GO:0002097,GO:0002098,GO:0002143,GO:0003674,GO:0006139,GO:0006396,GO:0006399,GO:0006400,GO:0006725,GO:0006807,GO:0008033,GO:0008150,GO:0008152,GO:0009451,GO:0009987,GO:0010467,GO:0016070,GO:0034227,GO:0034470,GO:0034641,GO:0034660,GO:0043170,GO:0043412,GO:0044237,GO:0044238,GO:0046483,GO:0071704,GO:0090304,GO:0097163,GO:0140104,GO:1901360	tusE	220341.16502259	1.75e-73	220.0	COG2920@1|root,COG2920@2|Bacteria,1RGVG@1224|Proteobacteria,1S5ZA@1236|Gammaproteobacteria,3ZMAI@590|Salmonella	1236|Gammaproteobacteria
g201	group_4586		glycine dehydrogenase	hit	S	PRD domain protein	-	-	group_4586	220341.16505548	2.64e-71	214.0	2CG0N@1|root,32S2X@2|Bacteria,1N0TA@1224|Proteobacteria,1S8WN@1236|Gammaproteobacteria,3ZMCE@590|Salmonella	1236|Gammaproteobacteria
g202	yqcC	yqcC	tRNA pseudouridine synthase C	hit	S	tRNA pseudouridine synthase C	yqcC	GO:0008150,GO:0009987,GO:0042710,GO:0044010,GO:0044764,GO:0051704	yqcC	220341.16504045	1.82e-75	225.0	COG3098@1|root,COG3098@2|Bacteria,1N7AG@1224|Proteobacteria,1SCXJ@1236|Gammaproteobacteria,3ZMA1@590|Salmonella	1236|Gammaproteobacteria
g203	group_4557		fimbria/pilus periplasmic chaperone;Fimbrial assembly chaperone;Chaperone protein EcpD;hypothetical protein;fimbrial chaperone	hit	M	chaperone	-	-	group_4557	220341.16501470	1.28e-168	471.0	COG3121@1|root,COG3121@2|Bacteria,1R3Z4@1224|Proteobacteria,1S1DZ@1236|Gammaproteobacteria	1236|Gammaproteobacteria
g204	hutC	hutC	histidine utilization repressor	hit	K	UTRA domain	hutC	-	hutC	220341.16502007	1.66e-157	443.0	COG2188@1|root,COG2188@2|Bacteria,1MVFM@1224|Proteobacteria,1RNPE@1236|Gammaproteobacteria,3ZITG@590|Salmonella	1236|Gammaproteobacteria
g205	hypE	;hypE	[NiFe] hydrogenase metallocenter assemblyprotein HypE;hydrogenase expression/formation protein HypE	hit	O	AIR synthase related protein, N-terminal domain	hypE	GO:0006464,GO:0006807,GO:0008150,GO:0008152,GO:0009987,GO:0010467,GO:0018193,GO:0018198,GO:0018249,GO:0019538,GO:0036211,GO:0043170,GO:0043412,GO:0044237,GO:0044238,GO:0044260,GO:0044267,GO:0046892,GO:0051604,GO:0071704,GO:1901564	hypE	90371.CY43_14930	5.92e-236	649.0	COG0309@1|root,COG0309@2|Bacteria,1MVCC@1224|Proteobacteria,1RQBE@1236|Gammaproteobacteria,3ZKW8@590|Salmonella	1236|Gammaproteobacteria
g206	gppA	;gppA	hypothetical protein;guanosine-5'-triphosphate3'-diphosphate diphosphatase;Guanosine-5'-triphosphate3'-diphosphate pyrophosphatase;Guanosine pentaphosphate phosphohydrolase	hit	F	Catalyzes the conversion of pppGpp to ppGpp. Guanosine pentaphosphate (pppGpp) is a cytoplasmic signaling molecule which together with ppGpp controls the stringent response , an adaptive process that allows bacteria to respond to amino acid starvation, resulting in the coordinated regulation of numerous cellular activities	gppA	GO:0003674,GO:0003824,GO:0006139,GO:0006725,GO:0006793,GO:0006807,GO:0006950,GO:0007154,GO:0008150,GO:0008152,GO:0008894,GO:0009267,GO:0009605,GO:0009987,GO:0009991,GO:0015949,GO:0016462,GO:0016787,GO:0016817,GO:0016818,GO:0031667,GO:0031668,GO:0031669,GO:0033554,GO:0034641,GO:0042594,GO:0044237,GO:0044238,GO:0044281,GO:0046483,GO:0050896,GO:0051716,GO:0055086,GO:0071496,GO:0071704,GO:1901360	gppA	220341.16504520	0.0	966.0	COG0248@1|root,COG0248@2|Bacteria,1MV35@1224|Proteobacteria,1RN3V@1236|Gammaproteobacteria,3ZJV7@590|Salmonella	1236|Gammaproteobacteria
g207	group_4527		Membrane protein;DUF1481 domain-containing protein	hit	S	Protein of unknown function (DUF1481)	yjaH	-	group_4527	90371.CY43_21775	2.61e-170	474.0	28HWS@1|root,2Z82N@2|Bacteria,1QFI0@1224|Proteobacteria,1RPY5@1236|Gammaproteobacteria,3ZIZR@590|Salmonella	1236|Gammaproteobacteria
g208	rplV	rplV	50S ribosomal protein L22	hit	J	The globular domain of the protein is located near the polypeptide exit tunnel on the outside of the subunit, while an extended beta-hairpin is found that lines the wall of the exit tunnel in the center of the 70S ribosome	rplV	GO:0003674,GO:0003735,GO:0005198,GO:0005575,GO:0005622,GO:0005623,GO:0005737,GO:0005829,GO:0005840,GO:0005844,GO:0006412,GO:0006518,GO:0006807,GO:0006996,GO:0008150,GO:0008152,GO:0009058,GO:0009059,GO:0009987,GO:0010467,GO:0015934,GO:0016043,GO:0019538,GO:0022607,GO:0022613,GO:0022618,GO:0022625,GO:0022626,GO:0032991,GO:0034622,GO:0034641,GO:0034645,GO:0042254,GO:0042255,GO:0042788,GO:0043043,GO:…	rplV	1073999.BN137_4056	5.01e-69	209.0	COG0091@1|root,COG0091@2|Bacteria,1RH0W@1224|Proteobacteria,1S5XT@1236|Gammaproteobacteria	1236|Gammaproteobacteria
g209	group_4515		HTH-type transcriptional regulator	hit	K	Helix-turn-helix XRE-family like proteins	yiaG	-	group_4515	220341.16504966	1.74e-72	218.0	COG2944@1|root,COG2944@2|Bacteria,1MZTT@1224|Proteobacteria,1SAQG@1236|Gammaproteobacteria,3ZMFN@590|Salmonella	1236|Gammaproteobacteria
g210	yhbY	yhbY	ribosome assembly RNA-binding protein YhbY	hit	J	CRS1 / YhbY (CRM) domain	yhbY	GO:0000027,GO:0000028,GO:0000966,GO:0000967,GO:0003674,GO:0005488,GO:0005575,GO:0005622,GO:0005623,GO:0005737,GO:0005829,GO:0006139,GO:0006364,GO:0006396,GO:0006725,GO:0006807,GO:0006996,GO:0008150,GO:0008152,GO:0009987,GO:0010467,GO:0016043,GO:0016070,GO:0016072,GO:0022607,GO:0022613,GO:0022618,GO:0034470,GO:0034471,GO:0034622,GO:0034641,GO:0034660,GO:0042254,GO:0042255,GO:0042273,GO:0042274,GO:…	yhbY	1197719.A464_3379	1.49e-70	213.0	COG1534@1|root,COG1534@2|Bacteria,1N8K5@1224|Proteobacteria,1SDIM@1236|Gammaproteobacteria,3ZMAA@590|Salmonella	1236|Gammaproteobacteria
g211	secG	secG	preprotein translocase subunit SecG	hit	U	Preprotein translocase SecG subunit	secG	GO:0003674,GO:0005215,GO:0005575,GO:0005623,GO:0005886,GO:0006605,GO:0006612,GO:0006613,GO:0006614,GO:0006616,GO:0006810,GO:0006886,GO:0008104,GO:0008150,GO:0008320,GO:0008565,GO:0009987,GO:0015031,GO:0015833,GO:0016020,GO:0016043,GO:0022857,GO:0022884,GO:0031522,GO:0032978,GO:0032991,GO:0033036,GO:0033365,GO:0034613,GO:0042886,GO:0042887,GO:0043952,GO:0044464,GO:0045047,GO:0045184,GO:0046907,GO:…	secG	1197719.A464_3374	6.85e-67	203.0	COG1314@1|root,COG1314@2|Bacteria,1N8MF@1224|Proteobacteria,1SD3P@1236|Gammaproteobacteria,3ZMBK@590|Salmonella	1236|Gammaproteobacteria
g212	yajC	yajC	preprotein translocase subunit YajC	hit	U	Preprotein translocase subunit	yajC	GO:0005575,GO:0005623,GO:0005886,GO:0005887,GO:0016020,GO:0016021,GO:0031224,GO:0031226,GO:0031522,GO:0032991,GO:0044425,GO:0044459,GO:0044464,GO:0071944	yajC	220341.16501675	4.13e-68	206.0	COG1862@1|root,COG1862@2|Bacteria,1MZT2@1224|Proteobacteria,1S9NV@1236|Gammaproteobacteria,3ZMDY@590|Salmonella	1236|Gammaproteobacteria
g213	group_4512		YbfN-like lipoprotein	hit	M	YbfN-like lipoprotein	ybfN	-	group_4512	220341.16501924	7.4e-71	213.0	2AQ40@1|root,31F99@2|Bacteria,1RHF9@1224|Proteobacteria,1S6DX@1236|Gammaproteobacteria,3ZMAY@590|Salmonella	1236|Gammaproteobacteria
g214	ynfA	ynfA	YnfA family protein	hit	S	Uncharacterised BCR, YnfA/UPF0060 family	ynfA	GO:0005575,GO:0005623,GO:0005886,GO:0005887,GO:0016020,GO:0016021,GO:0031224,GO:0031226,GO:0044425,GO:0044459,GO:0044464,GO:0071944	ynfA	220341.16502654	2.16e-72	217.0	COG1742@1|root,COG1742@2|Bacteria,1MZI8@1224|Proteobacteria,1SA4U@1236|Gammaproteobacteria,3ZMG1@590|Salmonella	1236|Gammaproteobacteria
g215	tusA	tusA	sulfurtransferase TusA	hit	J	Sulfur carrier protein involved in sulfur trafficking in the cell. Part of a sulfur-relay system required for 2-thiolation during synthesis of 2-thiouridine of the modified wobble base 5- methylaminomethyl-2-thiouridine (mnm(5)s(2)U) in tRNA. Interacts with IscS and stimulates its cysteine desulfurase activity. Accepts an activated sulfur from IscS, which is then transferred to TusD, and thus det…	tusA	GO:0002097,GO:0002098,GO:0002143,GO:0003674,GO:0005575,GO:0005622,GO:0005623,GO:0005737,GO:0005829,GO:0006139,GO:0006396,GO:0006399,GO:0006400,GO:0006725,GO:0006732,GO:0006777,GO:0006793,GO:0006796,GO:0006807,GO:0008033,GO:0008150,GO:0008152,GO:0009058,GO:0009108,GO:0009451,GO:0009987,GO:0010467,GO:0016070,GO:0018130,GO:0019538,GO:0019637,GO:0019720,GO:0019725,GO:0034227,GO:0034470,GO:0034641,GO:…	tusA	1197719.A464_3653	1.22e-74	223.0	COG0425@1|root,COG0425@2|Bacteria,1MZA5@1224|Proteobacteria,1S8TC@1236|Gammaproteobacteria,3ZMFA@590|Salmonella	1236|Gammaproteobacteria
g216	uspB	uspB	universal stress protein UspB	hit	S	Universal stress protein B (UspB)	uspB	GO:0005575,GO:0005623,GO:0005886,GO:0008150,GO:0009636,GO:0010033,GO:0016020,GO:0042221,GO:0042493,GO:0044464,GO:0045471,GO:0046677,GO:0050896,GO:0071944,GO:0097305,GO:1901700	uspB	218493.SBG_3183	3.64e-76	227.0	291H9@1|root,2ZP3V@2|Bacteria,1RDHD@1224|Proteobacteria,1S3P8@1236|Gammaproteobacteria,3ZMB7@590|Salmonella	1236|Gammaproteobacteria
g217	arnE	arnE	4-amino-4-deoxy-L-arabinose-phosphoundecaprenol flippase subunit ArnE	hit	U	Translocates 4-amino-4-deoxy-L-arabinose- phosphoundecaprenol (alpha-L-Ara4N-phosphoundecaprenol) from the cytoplasmic to the periplasmic side of the inner membrane	arnE	GO:0005575,GO:0005623,GO:0005886,GO:0005887,GO:0008150,GO:0010035,GO:0010038,GO:0010039,GO:0010041,GO:0016020,GO:0016021,GO:0031224,GO:0031226,GO:0042221,GO:0044425,GO:0044459,GO:0044464,GO:0050896,GO:0071944	arnE	90371.CY43_12335	4.62e-70	211.0	COG2076@1|root,COG2076@2|Bacteria,1MY82@1224|Proteobacteria,1SYBA@1236|Gammaproteobacteria,3ZMEA@590|Salmonella	1236|Gammaproteobacteria
g218	group_4389	;cof	Hydrolase;HAD-IIB family hydrolase;hydrolase;hypothetical protein	hit	S	Sucrose-6F-phosphate phosphohydrolase	yidA	-	group_4389	220341.16504727	1.5e-176	491.0	COG0561@1|root,COG0561@2|Bacteria,1RDYP@1224|Proteobacteria,1S0EU@1236|Gammaproteobacteria,3ZMT6@590|Salmonella	1236|Gammaproteobacteria
g219	raiA	raiA	ribosome-associated translation inhibitor RaiA	hit	J	Sigma 54 modulation protein / S30EA ribosomal protein	raiA	GO:0003674,GO:0005488,GO:0005575,GO:0005622,GO:0005623,GO:0005737,GO:0005829,GO:0005840,GO:0006417,GO:0006446,GO:0006448,GO:0006950,GO:0008150,GO:0009266,GO:0009409,GO:0009628,GO:0009889,GO:0009890,GO:0009892,GO:0010468,GO:0010556,GO:0010558,GO:0010605,GO:0010608,GO:0010629,GO:0015935,GO:0017148,GO:0019222,GO:0022626,GO:0022627,GO:0031323,GO:0031324,GO:0031326,GO:0031327,GO:0032268,GO:0032269,GO:…	raiA	220341.16503819	6.28e-73	219.0	COG1544@1|root,COG1544@2|Bacteria,1RD2Y@1224|Proteobacteria,1S6GT@1236|Gammaproteobacteria,3ZM9S@590|Salmonella	1236|Gammaproteobacteria
g220	glnB	glnB	nitrogen regulatory protein P-II	hit	K	Nitrogen regulatory protein P-II	glnB	GO:0000166,GO:0003674,GO:0005488,GO:0005515,GO:0005524,GO:0005575,GO:0005622,GO:0005623,GO:0005737,GO:0005829,GO:0006808,GO:0008144,GO:0008150,GO:0009889,GO:0010565,GO:0017076,GO:0019216,GO:0019217,GO:0019222,GO:0030234,GO:0030554,GO:0031323,GO:0031326,GO:0032553,GO:0032555,GO:0032559,GO:0035639,GO:0036094,GO:0042304,GO:0042802,GO:0043167,GO:0043168,GO:0044424,GO:0044444,GO:0044464,GO:0046890,GO:…	glnB	1197719.A464_2673	4.42e-73	219.0	COG0347@1|root,COG0347@2|Bacteria,1RGWK@1224|Proteobacteria,1S67I@1236|Gammaproteobacteria,3ZMCB@590|Salmonella	1236|Gammaproteobacteria
g221	group_4373		hypothetical protein	hit	-	-	-	-	group_4373	90371.CY43_22200	4.59e-66	201.0	2EFKR@1|root,339D0@2|Bacteria,1NCV6@1224|Proteobacteria,1SDCN@1236|Gammaproteobacteria,3ZMHB@590|Salmonella	1236|Gammaproteobacteria
g222	bamE	bamE	outer membrane protein assembly factor BamE	hit	M	Part of the outer membrane protein assembly complex, which is involved in assembly and insertion of beta-barrel proteins into the outer membrane	bamE	GO:0003674,GO:0005488,GO:0005515,GO:0005575,GO:0005623,GO:0008104,GO:0008150,GO:0009279,GO:0009987,GO:0016020,GO:0016021,GO:0016043,GO:0019867,GO:0022607,GO:0030312,GO:0030313,GO:0030674,GO:0031224,GO:0031230,GO:0031241,GO:0031246,GO:0031975,GO:0032991,GO:0033036,GO:0034613,GO:0042221,GO:0042802,GO:0043163,GO:0043165,GO:0044085,GO:0044091,GO:0044425,GO:0044462,GO:0044464,GO:0045184,GO:0045203,GO:…	bamE	220341.16503838	4.59e-75	224.0	COG2913@1|root,COG2913@2|Bacteria,1N6YW@1224|Proteobacteria,1SCTT@1236|Gammaproteobacteria,3ZMAM@590|Salmonella	1236|Gammaproteobacteria
g223	lldP	;lldP	L-lactate permease;lactate permease LctP family transporter	hit	U	L-lactate permease	lldP	GO:0003674,GO:0005215,GO:0005575,GO:0005623,GO:0005886,GO:0005887,GO:0006810,GO:0006811,GO:0006812,GO:0006950,GO:0006974,GO:0008150,GO:0008324,GO:0009987,GO:0015075,GO:0015077,GO:0015078,GO:0015291,GO:0015293,GO:0015294,GO:0015295,GO:0015318,GO:0015672,GO:0016020,GO:0016021,GO:0022804,GO:0022857,GO:0022890,GO:0031224,GO:0031226,GO:0033554,GO:0034220,GO:0044425,GO:0044459,GO:0044464,GO:0050896,GO:…	lldP	90371.CY43_19160	0.0	1069.0	COG1620@1|root,COG1620@2|Bacteria,1MV13@1224|Proteobacteria,1RPNW@1236|Gammaproteobacteria,3ZIWV@590|Salmonella	1236|Gammaproteobacteria
g224	prfH	;prfH	hypothetical protein;peptide chain release factor H	hit	J	RF-1 domain	prfH	-	prfH	220341.16501601	4.47e-146	412.0	COG1186@1|root,COG1186@2|Bacteria,1R9YA@1224|Proteobacteria,1RR3F@1236|Gammaproteobacteria,3ZN5H@590|Salmonella	1236|Gammaproteobacteria
g225	recC	recC	exodeoxyribonuclease V subunit gamma	hit	L	A helicase nuclease that prepares dsDNA breaks (DSB) for recombinational DNA repair. Binds to DSBs and unwinds DNA via a highly rapid and processive ATP-dependent bidirectional helicase activity. Unwinds dsDNA until it encounters a Chi (crossover hotspot instigator) sequence from the 3' direction. Cuts ssDNA a few nucleotides 3' to the Chi site. The properties and activities of the enzyme are cha…	recC	GO:0000724,GO:0000725,GO:0003674,GO:0003678,GO:0003824,GO:0004003,GO:0004386,GO:0004518,GO:0004519,GO:0004527,GO:0004529,GO:0004536,GO:0005575,GO:0005622,GO:0005623,GO:0006139,GO:0006259,GO:0006281,GO:0006302,GO:0006310,GO:0006725,GO:0006807,GO:0006950,GO:0006952,GO:0006974,GO:0006996,GO:0008026,GO:0008094,GO:0008150,GO:0008152,GO:0008854,GO:0009314,GO:0009338,GO:0009628,GO:0009987,GO:0016043,GO:…	recC	220341.16504074	0.0	2253.0	COG1330@1|root,COG1330@2|Bacteria,1MWTI@1224|Proteobacteria,1RNT0@1236|Gammaproteobacteria,3ZJG4@590|Salmonella	1236|Gammaproteobacteria
g226	group_4312	hypA	hydrogenase maturation nickel metallochaperone HypA	hit	S	Probably plays a role in a hydrogenase nickel cofactor insertion step	hypA	GO:0003674,GO:0005488,GO:0006807,GO:0008150,GO:0008152,GO:0008270,GO:0010467,GO:0016151,GO:0019538,GO:0043167,GO:0043169,GO:0043170,GO:0044238,GO:0046872,GO:0046914,GO:0051604,GO:0071704,GO:1901564	group_4312	1197719.A464_3176	5.54e-81	239.0	COG0375@1|root,COG0375@2|Bacteria,1MZJH@1224|Proteobacteria,1S5WG@1236|Gammaproteobacteria,3ZMBF@590|Salmonella	1236|Gammaproteobacteria
g227	osmE	osmE	osmotically-inducible lipoprotein OsmE	hit	M	SmpA / OmlA family	osmE	GO:0006950,GO:0006970,GO:0008150,GO:0009628,GO:0050896	osmE	220341.16502880	7.29e-77	229.0	COG2913@1|root,COG2913@2|Bacteria,1RD8V@1224|Proteobacteria,1S48R@1236|Gammaproteobacteria,3ZMBR@590|Salmonella	1236|Gammaproteobacteria
g228	ynfB	ynfB	DUF1283 domain-containing protein	hit	S	Protein of unknown function (DUF1283)	ynfB	GO:0005575,GO:0005623,GO:0009279,GO:0016020,GO:0019867,GO:0030312,GO:0030313,GO:0031975,GO:0044462,GO:0044464,GO:0071944	ynfB	220341.16502655	2.75e-72	217.0	2CSJ8@1|root,32SRB@2|Bacteria,1N0YE@1224|Proteobacteria,1S9BH@1236|Gammaproteobacteria,3ZM9R@590|Salmonella	1236|Gammaproteobacteria
g229	erpA	erpA	iron-sulfur cluster insertion protein ErpA	hit	C	Iron-sulphur cluster biosynthesis	erpA	GO:0003674,GO:0005488,GO:0005506,GO:0005575,GO:0005622,GO:0005623,GO:0005737,GO:0005829,GO:0006091,GO:0006790,GO:0006807,GO:0008150,GO:0008152,GO:0009060,GO:0009061,GO:0009987,GO:0010467,GO:0015980,GO:0016043,GO:0016226,GO:0019538,GO:0022607,GO:0031163,GO:0043167,GO:0043169,GO:0043170,GO:0044085,GO:0044237,GO:0044238,GO:0044424,GO:0044444,GO:0044464,GO:0045333,GO:0046872,GO:0046914,GO:0048037,GO:…	erpA	1197719.A464_205	2.34e-78	233.0	COG0316@1|root,COG0316@2|Bacteria,1RHCW@1224|Proteobacteria,1S675@1236|Gammaproteobacteria,3ZM9K@590|Salmonella	1236|Gammaproteobacteria
g230	ridA	ridA	RutC family protein YoaB	hit	J	Endoribonuclease L-PSP	yoaB	GO:0005575,GO:0005622,GO:0005623,GO:0005737,GO:0005829,GO:0044424,GO:0044444,GO:0044464	ridA	90371.CY43_09305	1.93e-77	230.0	COG0251@1|root,COG0251@2|Bacteria,1MZ5K@1224|Proteobacteria,1S5WM@1236|Gammaproteobacteria,3ZMA5@590|Salmonella	1236|Gammaproteobacteria
g231	group_4255		YejG-like protein	hit	S	YejG-like protein	yejG	-	group_4255	1197719.A464_2352	8.16e-79	234.0	2ATGA@1|root,31IZZ@2|Bacteria,1RHRA@1224|Proteobacteria,1S625@1236|Gammaproteobacteria,3ZMBH@590|Salmonella	1236|Gammaproteobacteria
g232	ytfP	ytfP	Gamma-glutamylcyclotransferase family protein ytfP	hit	S	Gamma-glutamyl cyclotransferase, AIG2-like	ytfP	GO:0005575,GO:0005622,GO:0005623,GO:0005737,GO:0005829,GO:0044424,GO:0044444,GO:0044464	ytfP	220341.16505539	3.59e-82	242.0	COG2105@1|root,COG2105@2|Bacteria,1RH3X@1224|Proteobacteria,1S68T@1236|Gammaproteobacteria,3ZMDQ@590|Salmonella	1236|Gammaproteobacteria
g233	group_4181		hypothetical protein;Putative secreted protein	hit	S	Pfam:DUF1311	-	-	group_4181	220341.16501767	1.02e-108	318.0	COG3755@1|root,COG3755@2|Bacteria,1MYDY@1224|Proteobacteria,1S68I@1236|Gammaproteobacteria	1236|Gammaproteobacteria
g234	yidH	yidH	Inner membrane protein YidH	hit	S	Domain of unknown function (DUF202)	yidH	GO:0005575,GO:0005623,GO:0005886,GO:0006950,GO:0006979,GO:0008150,GO:0016020,GO:0044464,GO:0050896,GO:0071944	yidH	90371.CY43_19740	9.52e-74	221.0	COG2149@1|root,COG2149@2|Bacteria,1REUC@1224|Proteobacteria,1S618@1236|Gammaproteobacteria,3ZN9X@590|Salmonella	1236|Gammaproteobacteria
g235	cutA	cutA	divalent cation tolerance protein CutA	hit	P	Involved in resistance toward heavy metals	cutA	GO:0003674,GO:0005488,GO:0005507,GO:0008150,GO:0009987,GO:0010035,GO:0010038,GO:0016043,GO:0022607,GO:0042221,GO:0043167,GO:0043169,GO:0043933,GO:0044085,GO:0046688,GO:0046872,GO:0046914,GO:0050896,GO:0051259,GO:0051260,GO:0065003,GO:0071840	cutA	1197719.A464_4333	8.46e-77	229.0	COG1324@1|root,COG1324@2|Bacteria,1N6TN@1224|Proteobacteria,1SCFM@1236|Gammaproteobacteria,3ZMAN@590|Salmonella	1236|Gammaproteobacteria
g236	chbA	chbA	PTS NN'-diacetylchitobiose transporter subunit IIA	hit	G	PTS system, Lactose/Cellobiose specific IIA subunit	chbA	GO:0003674,GO:0003824,GO:0005215,GO:0005575,GO:0005622,GO:0005623,GO:0005737,GO:0005829,GO:0006810,GO:0008150,GO:0008643,GO:0009401,GO:0009987,GO:0015144,GO:0016043,GO:0016740,GO:0016772,GO:0016773,GO:0022607,GO:0022804,GO:0022857,GO:0034219,GO:0043933,GO:0044085,GO:0044424,GO:0044444,GO:0044464,GO:0051179,GO:0051234,GO:0051259,GO:0051260,GO:0055085,GO:0065003,GO:0071702,GO:0071840,GO:0090563,GO:…	chbA	90371.CY43_06690	5.3e-71	214.0	COG1447@1|root,COG1447@2|Bacteria,1RI0T@1224|Proteobacteria,1S75F@1236|Gammaproteobacteria,3ZM9M@590|Salmonella	1236|Gammaproteobacteria
g237	sdhD	sdhD	succinate dehydrogenase membrane anchor subunit	hit	C	Membrane-anchoring subunit of succinate dehydrogenase (SDH)	sdhD	GO:0000104,GO:0003674,GO:0003824,GO:0005488,GO:0005575,GO:0005622,GO:0005623,GO:0005886,GO:0006082,GO:0006091,GO:0006099,GO:0006101,GO:0008150,GO:0008152,GO:0009055,GO:0009060,GO:0009987,GO:0015980,GO:0016020,GO:0016043,GO:0016491,GO:0016627,GO:0016999,GO:0017004,GO:0017144,GO:0019752,GO:0020037,GO:0022607,GO:0022900,GO:0032991,GO:0034622,GO:0043436,GO:0043933,GO:0044085,GO:0044237,GO:0044238,GO:…	sdhD	220341.16501965	4.9e-67	204.0	COG2142@1|root,COG2142@2|Bacteria,1MZR9@1224|Proteobacteria,1S9TS@1236|Gammaproteobacteria,3ZMAV@590|Salmonella	1236|Gammaproteobacteria
g238	rplS	rplS	50S ribosomal protein L19	hit	J	This protein is located at the 30S-50S ribosomal subunit interface and may play a role in the structure and function of the aminoacyl-tRNA binding site	rplS	GO:0000027,GO:0003674,GO:0003676,GO:0003723,GO:0003735,GO:0005198,GO:0005488,GO:0005575,GO:0005622,GO:0005623,GO:0005737,GO:0005829,GO:0005840,GO:0006412,GO:0006518,GO:0006807,GO:0006996,GO:0008150,GO:0008152,GO:0009058,GO:0009059,GO:0009987,GO:0010467,GO:0015934,GO:0016043,GO:0019538,GO:0019843,GO:0022607,GO:0022613,GO:0022618,GO:0022625,GO:0022626,GO:0032991,GO:0034622,GO:0034641,GO:0034645,GO:…	rplS	220341.16503827	4.71e-74	222.0	COG0335@1|root,COG0335@2|Bacteria,1RH3A@1224|Proteobacteria,1S5XX@1236|Gammaproteobacteria,3ZMBP@590|Salmonella	1236|Gammaproteobacteria
g239	group_4160	;rarD	Chloramphenicol-sensitive protein RarD;EamA family transporter RarD	hit	S	EamA-like transporter family	rarD	-	group_4160	90371.CY43_20695	3.16e-201	558.0	COG2962@1|root,COG2962@2|Bacteria,1MX5G@1224|Proteobacteria,1RMAC@1236|Gammaproteobacteria,3ZIUM@590|Salmonella	1236|Gammaproteobacteria
g240	group_4158	;ydeI	hypothetical protein;Periplasmic protein;YdeI family stress tolerance OB fold protein	hit	S	Bacterial OB fold (BOF) protein	ydeI	GO:0000302,GO:0006950,GO:0006979,GO:0008150,GO:0009636,GO:0009987,GO:0010035,GO:0033554,GO:0034599,GO:0034614,GO:0035690,GO:0042221,GO:0042493,GO:0042542,GO:0042710,GO:0044010,GO:0044011,GO:0044764,GO:0046677,GO:0050896,GO:0051703,GO:0051704,GO:0051716,GO:0070301,GO:0070887,GO:0071236,GO:0090605,GO:0090609,GO:0097237,GO:1901700,GO:1901701	group_4158	90371.CY43_07715	2.29e-88	259.0	COG3111@1|root,COG3111@2|Bacteria,1REUG@1224|Proteobacteria,1S54G@1236|Gammaproteobacteria,3ZM5W@590|Salmonella	1236|Gammaproteobacteria
g241	mgtA	;mgtA	Magnesium-transporting ATPase MgtA;magnesium-translocating P-type ATPase;Mg(2+) transport ATPase P-type;cation transporting ATPase C-terminal domain-containing protein;Magnesium-transporting ATPase P-type 1	hit	P	Cation transporter/ATPase, N-terminus	mgtA	GO:0003674,GO:0003824,GO:0005215,GO:0005575,GO:0005622,GO:0005623,GO:0005886,GO:0005887,GO:0006810,GO:0006811,GO:0006812,GO:0008150,GO:0008324,GO:0015075,GO:0015318,GO:0015399,GO:0015405,GO:0016020,GO:0016021,GO:0016462,GO:0016787,GO:0016817,GO:0016818,GO:0016887,GO:0017111,GO:0019829,GO:0022804,GO:0022853,GO:0022857,GO:0022890,GO:0031224,GO:0031226,GO:0034220,GO:0042623,GO:0042625,GO:0042626,GO:…	mgtA	220341.16505565	0.0	1755.0	COG0474@1|root,COG0474@2|Bacteria,1MUU5@1224|Proteobacteria,1RMYC@1236|Gammaproteobacteria,3ZIRV@590|Salmonella	1236|Gammaproteobacteria
g242	group_4134		CaiF/GrlA family transcriptional regulator	hit	S	CaiF/GrlA transcriptional regulator	-	-	group_4134	220341.16504105	5.53e-122	347.0	2B340@1|root,31VRP@2|Bacteria,1QTMN@1224|Proteobacteria,1TKTQ@1236|Gammaproteobacteria,3ZMNY@590|Salmonella	1236|Gammaproteobacteria
g243	fimW	;fimW	hypothetical protein;fimbria biosynthesis transcriptional regulator FimW;helix-turn-helix transcriptional regulator	hit	K	luxR family	-	-	fimW	220341.16501816	7.01e-141	397.0	COG2771@1|root,COG2771@2|Bacteria,1QQV5@1224|Proteobacteria,1RTJ9@1236|Gammaproteobacteria,3ZMQV@590|Salmonella	1236|Gammaproteobacteria
g244	group_4112	;yciE	Protein yciF;Ferritin-like metal-binding protein YciE;DUF892 domain-containing protein	hit	S	Domain of unknown function (DUF892)	yciF	GO:0006950,GO:0006974,GO:0008150,GO:0009987,GO:0033554,GO:0050896,GO:0051716	group_4112	220341.16502446	2.62e-105	305.0	COG3685@1|root,COG3685@2|Bacteria,1REKN@1224|Proteobacteria,1S45E@1236|Gammaproteobacteria,3ZKN1@590|Salmonella	1236|Gammaproteobacteria
g245	yqaB	;yqaB	Phosphatase YqaB;fructose-1-phosphate/6-phosphogluconate phosphatase;HAD-IA family hydrolase	hit	S	haloacid dehalogenase-like hydrolase	yqaB	GO:0000287,GO:0003674,GO:0003824,GO:0005488,GO:0006793,GO:0006796,GO:0008150,GO:0008152,GO:0008801,GO:0009987,GO:0016311,GO:0016787,GO:0016788,GO:0016791,GO:0016853,GO:0016866,GO:0016868,GO:0042578,GO:0043167,GO:0043169,GO:0044237,GO:0046872	yqaB	220341.16503902	2.89e-135	382.0	COG0637@1|root,COG0637@2|Bacteria,1PUMZ@1224|Proteobacteria,1RNJC@1236|Gammaproteobacteria,3ZJ8T@590|Salmonella	1236|Gammaproteobacteria
g246	group_4103		DUF2002 domain-containing protein	hit	S	Protein of unknown function (DUF2002)	ygaC	-	group_4103	220341.16503884	4.16e-82	242.0	2DF7E@1|root,2ZQRR@2|Bacteria,1REJU@1224|Proteobacteria,1S4HA@1236|Gammaproteobacteria,3ZMB3@590|Salmonella	1236|Gammaproteobacteria
g247	rplR	rplR	50S ribosomal protein L18	hit	J	This is one of the proteins that binds and probably mediates the attachment of the 5S RNA into the large ribosomal subunit, where it forms part of the central protuberance	rplR	GO:0003674,GO:0003676,GO:0003723,GO:0003735,GO:0005198,GO:0005488,GO:0005575,GO:0005622,GO:0005623,GO:0005737,GO:0005829,GO:0005840,GO:0006412,GO:0006518,GO:0006807,GO:0008097,GO:0008150,GO:0008152,GO:0009058,GO:0009059,GO:0009987,GO:0010467,GO:0015934,GO:0019538,GO:0019843,GO:0022625,GO:0022626,GO:0032991,GO:0034641,GO:0034645,GO:0043043,GO:0043170,GO:0043226,GO:0043228,GO:0043229,GO:0043232,GO:…	rplR	1073999.BN137_1438	2.14e-71	215.0	COG0256@1|root,COG0256@2|Bacteria,1RGY7@1224|Proteobacteria,1S5V2@1236|Gammaproteobacteria	1236|Gammaproteobacteria
g248	group_4047		DUF4156 domain-containing protein	hit	S	Domain of unknown function (DUF4156)	yjeI	GO:0006950,GO:0006974,GO:0008150,GO:0009987,GO:0033554,GO:0050896,GO:0051716	group_4047	218493.SBG_3782	1.24e-78	234.0	2AGMU@1|root,316V4@2|Bacteria,1RJBQ@1224|Proteobacteria,1S6CT@1236|Gammaproteobacteria,3ZM6E@590|Salmonella	1236|Gammaproteobacteria
g249	yiaA	yiaA	YiaAB domain-containing protein	hit	S	yiaA/B two helix domain	yiaB	-	yiaA	220341.16504957	4.32e-80	237.0	COG4682@1|root,COG4682@2|Bacteria,1QMJK@1224|Proteobacteria,1RTIF@1236|Gammaproteobacteria,3ZMDG@590|Salmonella	1236|Gammaproteobacteria
g250	ychN	ychN	Protein YchN	hit	P	DsrE/DsrF-like family	ychN	GO:0003674,GO:0005488,GO:0005515,GO:0005575,GO:0005622,GO:0005623,GO:0005737,GO:0005829,GO:0008150,GO:0009987,GO:0016043,GO:0022607,GO:0034214,GO:0042802,GO:0043933,GO:0044085,GO:0044424,GO:0044444,GO:0044464,GO:0051259,GO:0065003,GO:0071840	ychN	220341.16502411	3.42e-77	230.0	COG1553@1|root,COG1553@2|Bacteria,1RDFR@1224|Proteobacteria,1S3RB@1236|Gammaproteobacteria,3ZM9N@590|Salmonella	1236|Gammaproteobacteria
g251	sinH	;sinH	hypothetical protein;intimin-like inverse autotransporter SinH;Intimin;Intimin ((Attaching and effacing protein) or invasin protein (SivH-like))	hit	M	Salmonella repeat of unknown function (DUF824)	ratA	-	sinH	220341.16503731	0.0	2081.0	COG1388@1|root,COG1388@2|Bacteria,1R8T4@1224|Proteobacteria,1S1MB@1236|Gammaproteobacteria,3ZK0Y@590|Salmonella	1236|Gammaproteobacteria
g252	sipA	;sipA	hypothetical protein;Pathogenicity island 1 effector protein;Pathogenicity island 1 effector protein SipA;SPI-1 type III secretion system effector SipA	hit	S	Salmonella invasion protein A	sipA	-	sipA	220341.16503960	0.0	1145.0	2E1IW@1|root,32WWN@2|Bacteria,1N49H@1224|Proteobacteria,1SS9Y@1236|Gammaproteobacteria,3ZKPJ@590|Salmonella	1236|Gammaproteobacteria
g253	dps	dps	DNA starvation/stationary phase protection protein Dps	hit	P	During stationary phase, binds the chromosome non- specifically, forming a highly ordered and stable dps-DNA co- crystal within which chromosomal DNA is condensed and protected from diverse damages. It protects DNA from oxidative damage by sequestering intracellular Fe(2 ) ion and storing it in the form of Fe(3 ) oxyhydroxide mineral, which can be released after reduction. One hydrogen peroxide o…	dps	GO:0003674,GO:0003676,GO:0003677,GO:0005488,GO:0005506,GO:0005515,GO:0005575,GO:0005623,GO:0006950,GO:0008150,GO:0008199,GO:0009289,GO:0009295,GO:0009605,GO:0009991,GO:0031667,GO:0042594,GO:0042802,GO:0042995,GO:0043167,GO:0043169,GO:0044464,GO:0046872,GO:0046914,GO:0050896,GO:0097159,GO:1901363	dps	220341.16502042	4.38e-113	325.0	COG0783@1|root,COG0783@2|Bacteria,1RAC5@1224|Proteobacteria,1RR4N@1236|Gammaproteobacteria,3ZJZH@590|Salmonella	1236|Gammaproteobacteria
g254	group_4030		Uncharacterized protein YfiR;DUF4154 domain-containing protein	hit	S	Domain of unknown function (DUF4154)	yfiR	GO:0001539,GO:0006928,GO:0008150,GO:0009987,GO:0040011,GO:0048870,GO:0051179,GO:0051674,GO:0071973,GO:0071978,GO:0097588	group_4030	220341.16503825	1.03e-118	339.0	2BSVP@1|root,32MZ8@2|Bacteria,1N04T@1224|Proteobacteria,1S4KR@1236|Gammaproteobacteria,3ZMFJ@590|Salmonella	1236|Gammaproteobacteria
g255	group_4001		putative exported protein	no-hit
g256	tusC	tusC	sulfurtransferase complex subunit TusC	hit	J	Part of a sulfur-relay system required for 2-thiolation of 5-methylaminomethyl-2-thiouridine (mnm(5)s(2)U) at tRNA wobble positions	tusC	GO:0002097,GO:0002098,GO:0002143,GO:0005575,GO:0005622,GO:0005623,GO:0005737,GO:0005829,GO:0006139,GO:0006396,GO:0006399,GO:0006400,GO:0006725,GO:0006807,GO:0008033,GO:0008150,GO:0008152,GO:0009451,GO:0009987,GO:0010467,GO:0016070,GO:0032991,GO:0034227,GO:0034470,GO:0034641,GO:0034660,GO:0043170,GO:0043412,GO:0044237,GO:0044238,GO:0044424,GO:0044444,GO:0044445,GO:0044464,GO:0046483,GO:0071704,GO:…	tusC	1197719.A464_3525	8.03e-81	239.0	COG2923@1|root,COG2923@2|Bacteria,1N8RV@1224|Proteobacteria,1SD0S@1236|Gammaproteobacteria,3ZM9G@590|Salmonella	1236|Gammaproteobacteria
g257	rpsM	rpsM	30S ribosomal protein S13	hit	J	Located at the top of the head of the 30S subunit, it contacts several helices of the 16S rRNA. In the 70S ribosome it contacts the 23S rRNA (bridge B1a) and protein L5 of the 50S subunit (bridge B1b), connecting the 2 subunits	rpsM	GO:0003674,GO:0003735,GO:0005198,GO:0005575,GO:0005622,GO:0005623,GO:0005737,GO:0005829,GO:0005840,GO:0006412,GO:0006518,GO:0006807,GO:0008150,GO:0008152,GO:0009058,GO:0009059,GO:0009987,GO:0010467,GO:0015935,GO:0019538,GO:0022613,GO:0022626,GO:0022627,GO:0032991,GO:0034641,GO:0034645,GO:0042254,GO:0043043,GO:0043170,GO:0043226,GO:0043228,GO:0043229,GO:0043232,GO:0043603,GO:0043604,GO:0044085,GO:…	rpsM	1197719.A464_3493	8.36e-74	221.0	COG0099@1|root,COG0099@2|Bacteria,1RD1G@1224|Proteobacteria,1S3NX@1236|Gammaproteobacteria,3ZMB8@590|Salmonella	1236|Gammaproteobacteria
g258	dinI~~~pyrC	dinI;pyrC	DNA damage-inducible protein I;dihydroorotase	hit	S	DinI-like family	dinI	GO:0003674,GO:0005488,GO:0005515,GO:0006950,GO:0006974,GO:0007154,GO:0008150,GO:0009432,GO:0009605,GO:0009987,GO:0009991,GO:0019899,GO:0031668,GO:0033554,GO:0050896,GO:0051716,GO:0071496	dinI~~~pyrC	90371.CY43_05925	3.75e-44	144.0	2DMSQ@1|root,32TF2@2|Bacteria,1N075@1224|Proteobacteria,1S8YE@1236|Gammaproteobacteria,3ZMKG@590|Salmonella	1236|Gammaproteobacteria
g259	group_3997	thrS	threonine--tRNA ligase	hit	J	Binds directly to 23S ribosomal RNA and is necessary for the in vitro assembly process of the 50S ribosomal subunit. It is not involved in the protein synthesizing functions of that subunit	rplT	GO:0000027,GO:0000900,GO:0003674,GO:0003676,GO:0003723,GO:0003729,GO:0003735,GO:0005198,GO:0005488,GO:0005575,GO:0005622,GO:0005623,GO:0005737,GO:0005829,GO:0005840,GO:0006355,GO:0006412,GO:0006417,GO:0006518,GO:0006807,GO:0006996,GO:0008150,GO:0008152,GO:0009058,GO:0009059,GO:0009889,GO:0009890,GO:0009892,GO:0009987,GO:0010467,GO:0010468,GO:0010556,GO:0010558,GO:0010605,GO:0010608,GO:0010629,GO:…	group_3997	1006000.GKAS_03624	2.3e-71	215.0	COG0292@1|root,COG0292@2|Bacteria,1RGU2@1224|Proteobacteria,1S3P3@1236|Gammaproteobacteria	1236|Gammaproteobacteria
g260	yjbR	yjbR	Uncharacterized protein YjbR	hit	S	YjbR	yjbR	-	yjbR	90371.CY43_22195	1.56e-78	233.0	COG2315@1|root,COG2315@2|Bacteria,1RD85@1224|Proteobacteria,1S3PR@1236|Gammaproteobacteria,3ZM77@590|Salmonella	1236|Gammaproteobacteria
g261	group_3996	araJ;	putative arabinose efflux permease AraJ MFS family;Putative permease;MFS transporter;Permease;hypothetical protein	hit	EGP	MFS_1 like family	-	-	group_3996	220341.16503505	2.48e-267	734.0	COG0477@1|root,COG2814@2|Bacteria,1RB5E@1224|Proteobacteria,1RYS9@1236|Gammaproteobacteria,3ZKI7@590|Salmonella	1236|Gammaproteobacteria
g262	group_3995	arsC	ArsC family reductase	hit	P	ArsC family	yffB	GO:0005575,GO:0005622,GO:0005623,GO:0005737,GO:0005829,GO:0044424,GO:0044444,GO:0044464	group_3995	220341.16503699	1.05e-85	251.0	COG1393@1|root,COG1393@2|Bacteria,1MZ6S@1224|Proteobacteria,1S8TR@1236|Gammaproteobacteria,3ZMCF@590|Salmonella	1236|Gammaproteobacteria
g263	group_3991	;rhaT	Permease of the drug/metabolite transporter (DMT) superfamily;EamA family transporter	hit	EG	EamA-like transporter family	yhbE	GO:0005575,GO:0005623,GO:0005886,GO:0016020,GO:0044464,GO:0071944	group_3991	220341.16504367	1.53e-219	607.0	COG0697@1|root,COG0697@2|Bacteria,1PGSE@1224|Proteobacteria,1RMZY@1236|Gammaproteobacteria,3ZK8Y@590|Salmonella	1236|Gammaproteobacteria
g264	group_3990		DUF1062 domain-containing protein;Uncharacterized protein conserved in bacteria	hit	S	Protein of unknown function (DUF1062)	-	-	group_3990	220341.16505619	1.84e-138	392.0	COG4332@1|root,COG4332@2|Bacteria,1N0V1@1224|Proteobacteria,1S40V@1236|Gammaproteobacteria,3ZK58@590|Salmonella	1236|Gammaproteobacteria
g265	wecB	;wecB	hypothetical protein;UDP-N-acetylglucosamine 2-epimerase (non-hydrolyzing)	hit	M	Catalyzes the reversible epimerization at C-2 of UDP-N- acetylglucosamine (UDP-GlcNAc) and thereby provides bacteria with UDP-N-acetylmannosamine (UDP-ManNAc), the activated donor of ManNAc residues	wecB	GO:0000271,GO:0003674,GO:0003824,GO:0005488,GO:0005515,GO:0005575,GO:0005622,GO:0005623,GO:0005737,GO:0005829,GO:0005975,GO:0005976,GO:0008150,GO:0008152,GO:0008761,GO:0009058,GO:0009059,GO:0009246,GO:0009987,GO:0016051,GO:0016853,GO:0016854,GO:0016857,GO:0033692,GO:0034637,GO:0034645,GO:0042802,GO:0043170,GO:0044237,GO:0044238,GO:0044249,GO:0044260,GO:0044262,GO:0044264,GO:0044424,GO:0044444,GO:…	wecB	90371.CY43_20525	8.32e-266	728.0	COG0381@1|root,COG0381@2|Bacteria,1MWZN@1224|Proteobacteria,1RPNC@1236|Gammaproteobacteria,3ZJKB@590|Salmonella	1236|Gammaproteobacteria
g266	ilvG	;ilvG	thiamine pyrophosphate-dependent enzyme;acetolactate synthase 2 catalytic subunit	hit	H	Thiamine pyrophosphate enzyme, central domain	ilvG	-	ilvG	220341.16504534	0.0	1099.0	COG0028@1|root,COG0028@2|Bacteria,1MU6U@1224|Proteobacteria,1RMQQ@1236|Gammaproteobacteria,3ZJ53@590|Salmonella	1236|Gammaproteobacteria
g267	napA	;napA	hypothetical protein;Periplasmic nitrate reductase;nitrate reductase catalytic subunit NapA	hit	C	nitrate reductase (NAP). Only expressed at high levels during aerobic growth. NapAB complex receives electrons from the membrane-anchored tetraheme protein NapC	napA	GO:0003674,GO:0003824,GO:0003954,GO:0005488,GO:0005575,GO:0005623,GO:0006091,GO:0008150,GO:0008152,GO:0008940,GO:0009061,GO:0009325,GO:0009987,GO:0015980,GO:0016491,GO:0016651,GO:0016661,GO:0030151,GO:0030288,GO:0030313,GO:0031975,GO:0032991,GO:0042597,GO:0043167,GO:0043169,GO:0044237,GO:0044464,GO:0045333,GO:0046872,GO:0046914,GO:0048037,GO:0051536,GO:0051539,GO:0051540,GO:0055114,GO:1902494	napA	90371.CY43_12125	0.0	1714.0	COG0243@1|root,COG0243@2|Bacteria,1NS3T@1224|Proteobacteria,1RMWN@1236|Gammaproteobacteria,3ZM35@590|Salmonella	1236|Gammaproteobacteria
g268	group_3979	;emrA	hypothetical protein;HlyD family secretion protein	hit	M	Barrel-sandwich domain of CusB or HlyD membrane-fusion	yhiI	GO:0005575,GO:0005623,GO:0005886,GO:0016020,GO:0044464,GO:0071944	group_3979	220341.16505024	2.17e-204	571.0	COG0845@1|root,COG0845@2|Bacteria,1MUG6@1224|Proteobacteria,1RS3I@1236|Gammaproteobacteria,3ZJVC@590|Salmonella	1236|Gammaproteobacteria
g269	spaK	;spaK	hypothetical protein;SPI-1 type III secretion system chaperone SpaK	hit	S	Involved in a secretory pathway responsible for the surface presentation of determinants needed for the entry of Salmonella species into mammalian cells	spaK	-	spaK	220341.16503973	1.21e-90	265.0	2CFCZ@1|root,32TGU@2|Bacteria,1N1ZQ@1224|Proteobacteria,1SER9@1236|Gammaproteobacteria,3ZM7C@590|Salmonella	1236|Gammaproteobacteria
g270	yaeH	;yaeH	DUF3461 domain-containing protein;YaeH;Chromosome segregation ATPase;Protein yaeH	hit	S	Protein of unknown function (DUF3461)	yaeH	-	yaeH	220341.16501492	3.83e-86	253.0	28NXJ@1|root,2ZBV4@2|Bacteria,1RD2V@1224|Proteobacteria,1S3XU@1236|Gammaproteobacteria,3ZM7M@590|Salmonella	1236|Gammaproteobacteria
g271	yjeH	yjeH;	L-methionine/branched-chain amino acid transporter;hypothetical protein;Transporter;L-methionine/branched-chain amino acid exporter YjeH	hit	E	Amino acid permease	yjeH	GO:0000099,GO:0000101,GO:0000102,GO:0001101,GO:0003333,GO:0003674,GO:0005215,GO:0005294,GO:0005342,GO:0005575,GO:0005623,GO:0005886,GO:0005887,GO:0006810,GO:0006811,GO:0006812,GO:0006820,GO:0006855,GO:0006865,GO:0008150,GO:0008324,GO:0008509,GO:0008514,GO:0009719,GO:0009987,GO:0010033,GO:0010243,GO:0015075,GO:0015171,GO:0015175,GO:0015179,GO:0015191,GO:0015238,GO:0015291,GO:0015297,GO:0015318,GO:…	yjeH	90371.CY43_22575	9.5e-285	781.0	COG0531@1|root,COG0531@2|Bacteria,1NCSX@1224|Proteobacteria,1RND7@1236|Gammaproteobacteria,3ZJN2@590|Salmonella	1236|Gammaproteobacteria
g272	stgD	;stgD	hypothetical protein;fimbrial protein StgD	hit	NU	Fimbrial protein	-	-	stgD	220341.16504773	1.33e-253	696.0	COG3539@1|root,COG3539@2|Bacteria,1QEC7@1224|Proteobacteria,1RV1Q@1236|Gammaproteobacteria,3ZME0@590|Salmonella	1236|Gammaproteobacteria
g273	gltD~~~preT	;gltD;preT	Putative oxidoreductase;FAD-dependent oxidoreductase;NADPH-dependent glutamate synthase beta chain or related oxidoreductase;NAD-dependent dihydropyrimidine dehydrogenase subunit PreT	hit	C	HI0933-like protein	preT	GO:0003674,GO:0003824,GO:0003954,GO:0005488,GO:0005575,GO:0005622,GO:0005623,GO:0005737,GO:0006139,GO:0006206,GO:0006208,GO:0006725,GO:0006807,GO:0008150,GO:0008152,GO:0009056,GO:0009112,GO:0009987,GO:0016491,GO:0016651,GO:0034641,GO:0044237,GO:0044238,GO:0044248,GO:0044270,GO:0044281,GO:0044424,GO:0044464,GO:0046113,GO:0046483,GO:0046700,GO:0048037,GO:0051536,GO:0051540,GO:0055086,GO:0055114,GO:…	gltD~~~preT	90371.CY43_11755	6.45e-304	828.0	COG0493@1|root,COG0493@2|Bacteria,1MU2H@1224|Proteobacteria,1RS6R@1236|Gammaproteobacteria,3ZKI3@590|Salmonella	1236|Gammaproteobacteria
g274	frdD	frdD	fumarate reductase subunit FrdD	hit	C	Seems to be involved in the anchoring of the catalytic components of the fumarate reductase complex to the cytoplasmic membrane	frdD	GO:0000104,GO:0003674,GO:0003824,GO:0005575,GO:0005622,GO:0005623,GO:0005886,GO:0005887,GO:0006091,GO:0006113,GO:0008150,GO:0008152,GO:0008177,GO:0009061,GO:0009987,GO:0015980,GO:0016020,GO:0016021,GO:0016491,GO:0016627,GO:0016635,GO:0031224,GO:0031226,GO:0032991,GO:0044237,GO:0044424,GO:0044425,GO:0044459,GO:0044464,GO:0045273,GO:0045274,GO:0045283,GO:0045284,GO:0045333,GO:0055114,GO:0070469,GO:…	frdD	220341.16505470	2.12e-81	241.0	COG3080@1|root,COG3080@2|Bacteria,1RDZD@1224|Proteobacteria,1S3W5@1236|Gammaproteobacteria,3ZMC6@590|Salmonella	1236|Gammaproteobacteria
g275	folB	folB	bifunctional dihydroneopterin aldolase/78-dihydroneopterin epimerase	hit	H	Catalyzes the conversion of 7,8-dihydroneopterin to 6- hydroxymethyl-7,8-dihydropterin	folB	GO:0003674,GO:0003824,GO:0004150,GO:0005488,GO:0005515,GO:0016829,GO:0016830,GO:0016832,GO:0042802	folB	90371.CY43_16710	1.96e-77	231.0	COG1539@1|root,COG1539@2|Bacteria,1MZ8Z@1224|Proteobacteria,1S9B2@1236|Gammaproteobacteria,3ZMCM@590|Salmonella	1236|Gammaproteobacteria
g276	group_3942	ldcC	ornithine decarboxylase	hit	E	Orn/Lys/Arg decarboxylase, N-terminal domain	speC	GO:0003674,GO:0003824,GO:0004586,GO:0005488,GO:0005575,GO:0005622,GO:0005623,GO:0005737,GO:0005829,GO:0006576,GO:0006595,GO:0006596,GO:0006807,GO:0008144,GO:0008150,GO:0008152,GO:0008216,GO:0008295,GO:0009058,GO:0009308,GO:0009309,GO:0009987,GO:0016829,GO:0016830,GO:0016831,GO:0019842,GO:0030170,GO:0034641,GO:0036094,GO:0042401,GO:0043167,GO:0043168,GO:0044106,GO:0044237,GO:0044249,GO:0044271,GO:…	group_3942	218493.SBG_2713	0.0	1345.0	COG1982@1|root,COG1982@2|Bacteria,1MWK4@1224|Proteobacteria,1RMVF@1236|Gammaproteobacteria,3ZMVC@590|Salmonella	1236|Gammaproteobacteria
g277	group_3941	arsC	arsenate reductase (glutaredoxin)	hit	P	ArsC family	arsC	GO:0005575,GO:0005622,GO:0005623,GO:0005737,GO:0005829,GO:0044424,GO:0044444,GO:0044464	group_3941	220341.16503713	8.32e-79	234.0	COG1393@1|root,COG1393@2|Bacteria,1MZ4Z@1224|Proteobacteria,1S8XH@1236|Gammaproteobacteria,3ZMD8@590|Salmonella	1236|Gammaproteobacteria
g278	rihA	;rihA	Nucleoside hydrolase;pyrimidine-specific ribonucleoside hydrolase RihA	hit	F	Hydrolyzes cytidine or uridine to ribose and cytosine or uracil, respectively	rihA	GO:0003674,GO:0003824,GO:0005488,GO:0005509,GO:0005575,GO:0005622,GO:0005623,GO:0005737,GO:0005829,GO:0006139,GO:0006152,GO:0006213,GO:0006725,GO:0006807,GO:0008150,GO:0008152,GO:0008477,GO:0009056,GO:0009116,GO:0009119,GO:0009164,GO:0009987,GO:0016787,GO:0016798,GO:0016799,GO:0019439,GO:0034641,GO:0034655,GO:0034656,GO:0042278,GO:0042454,GO:0043167,GO:0043169,GO:0044237,GO:0044238,GO:0044248,GO:…	rihA	220341.16501905	8.52e-147	417.0	COG1957@1|root,COG1957@2|Bacteria,1MUIW@1224|Proteobacteria,1RSCY@1236|Gammaproteobacteria,3ZJUT@590|Salmonella	1236|Gammaproteobacteria
g279	comEC	;comEC	Metallo-beta-lactamase superfamily hydrolase;DNA internalization-related competence protein ComEC/Rec2;ComEC family competence protein;hypothetical protein;ComEC family protein;Uncharacterized protein YcaI	hit	S	Competence protein	ycaI	GO:0005575,GO:0005623,GO:0005886,GO:0016020,GO:0044464,GO:0071944	comEC	90371.CY43_05025	0.0	1423.0	COG0658@1|root,COG2333@1|root,COG0658@2|Bacteria,COG2333@2|Bacteria,1MUKF@1224|Proteobacteria,1RMW6@1236|Gammaproteobacteria,3ZKG1@590|Salmonella	1236|Gammaproteobacteria
g280	group_3881	;tdh	Dehydrogenase;Putative dehydrogenase;Zn-dependent oxidoreductase;alcohol dehydrogenase catalytic domain-containing protein	hit	E	Alcohol dehydrogenase GroES-like domain	rspB	-	group_3881	90371.CY43_07670	3.92e-247	678.0	COG1063@1|root,COG1063@2|Bacteria,1MWX0@1224|Proteobacteria,1SYGT@1236|Gammaproteobacteria,3ZK2T@590|Salmonella	1236|Gammaproteobacteria
g281	group_3880		DUF1323 domain-containing protein	hit	L	Putative transcription regulator (DUF1323)	yfeC	-	group_3880	220341.16503636	1.88e-80	238.0	COG3415@1|root,COG3415@2|Bacteria,1RGU5@1224|Proteobacteria,1S6VV@1236|Gammaproteobacteria,3ZMDC@590|Salmonella	1236|Gammaproteobacteria
g282	group_3873		DUF202 domain-containing protein	hit	S	Domain of unknown function (DUF202)	yidG	GO:0005575,GO:0005623,GO:0005886,GO:0016020,GO:0044464,GO:0071944	group_3873	90371.CY43_19735	5.19e-78	232.0	2ATH5@1|root,31J0W@2|Bacteria,1RJVC@1224|Proteobacteria,1S5YN@1236|Gammaproteobacteria,3ZME3@590|Salmonella	1236|Gammaproteobacteria
g283	yacL	yacL	protein YacL	hit	S	Uncharacterised protein family (UPF0231)	yacL	-	yacL	220341.16501446	1.67e-83	246.0	COG3112@1|root,COG3112@2|Bacteria,1RH38@1224|Proteobacteria,1S6EG@1236|Gammaproteobacteria,3ZMD2@590|Salmonella	1236|Gammaproteobacteria
g284	group_3869		Glycine-rich SFCGS	hit	S	Glycine-rich SFCGS	-	-	group_3869	1218086.BBNB01000009_gene1006	2.67e-80	238.0	292C3@1|root,2ZPWH@2|Bacteria,1RCX4@1224|Proteobacteria,1S3RH@1236|Gammaproteobacteria,3WYEH@544|Citrobacter	1236|Gammaproteobacteria
g285	yneE	;yneE	Inner membrane protein;hypothetical protein;Putative membrane protein;UPF0187 protein YneE	hit	S	Bestrophin, RFP-TM, chloride channel	yneE	GO:0005575,GO:0005623,GO:0005886,GO:0016020,GO:0044464,GO:0071944	yneE	220341.16502632	1e-221	612.0	COG3781@1|root,COG3781@2|Bacteria,1MX91@1224|Proteobacteria,1S0QU@1236|Gammaproteobacteria,3ZJR3@590|Salmonella	1236|Gammaproteobacteria
g286	group_3864		hypothetical protein;2-keto-3-deoxygluconate permease 1	hit	U	The 2-keto-3-deoxygluconate permease transports the degraded pectin products into the bacterial cell, where they serve as carbon and energy sources. This is a hydrogen coupled transport system	kdgT	-	group_3864	220341.16501447	3.53e-207	575.0	28H7K@1|root,2Z7JT@2|Bacteria,1MV01@1224|Proteobacteria,1RSNP@1236|Gammaproteobacteria,3ZN4M@590|Salmonella	1236|Gammaproteobacteria
g287	grxA	;grxA	Glutaredoxin 1;GrxA family glutaredoxin	hit	O	functions as an electron carrier in the glutathione-dependent synthesis of deoxyribonucleotides by the enzyme ribonucleotide reductase	grxA	-	grxA	220341.16502075	8.42e-55	171.0	COG0695@1|root,COG0695@2|Bacteria,1RGZ7@1224|Proteobacteria,1S5ZP@1236|Gammaproteobacteria,3ZMGE@590|Salmonella	1236|Gammaproteobacteria
g288	stfA	;stfA	hypothetical protein;fimbrial major subunit StfA	hit	NU	Part of the yfcOPQRSUV fimbrial operon. Could contribute to adhesion to various surfaces in specific environmental niches. Increases adhesion to eukaryotic T24 bladder epithelial cells in the absence of fim genes	yfcV	GO:0003674,GO:0005215,GO:0005575,GO:0005623,GO:0006810,GO:0007155,GO:0008150,GO:0009279,GO:0009297,GO:0009987,GO:0015267,GO:0015288,GO:0015473,GO:0016020,GO:0016043,GO:0019867,GO:0022607,GO:0022610,GO:0022803,GO:0022829,GO:0022857,GO:0030030,GO:0030031,GO:0030312,GO:0030313,GO:0031975,GO:0043711,GO:0044085,GO:0044462,GO:0044464,GO:0051179,GO:0051234,GO:0055085,GO:0071840,GO:0071944	stfA	90371.CY43_00980	1.87e-121	347.0	COG3539@1|root,COG3539@2|Bacteria,1NDMB@1224|Proteobacteria,1SCDX@1236|Gammaproteobacteria	1236|Gammaproteobacteria
g289	yfhL~~~nuoI	yfhL;nuoI	YfhL family 4Fe-4S dicluster ferredoxin	hit	C	Ferredoxin	yfhL	-	yfhL~~~nuoI	220341.16503788	4.33e-61	187.0	COG1145@1|root,COG1145@2|Bacteria,1MZ6H@1224|Proteobacteria,1S8ZV@1236|Gammaproteobacteria,3ZMGV@590|Salmonella	1236|Gammaproteobacteria
g290	ratB	ratB;	DUF823 DUF824 domains-containing protein;hypothetical protein;Outer membrane protein RatB;Inverse autotransporter beta-barrel domain-containing protein;RatB;DUF823 domain-containing protein;RatA -like protein	hit	M	Salmonella repeat of unknown function (DUF824)	-	-	ratB	90371.CY43_13420	0.0	4096.0	COG1388@1|root,COG1388@2|Bacteria,1R8T4@1224|Proteobacteria,1S1MB@1236|Gammaproteobacteria,3ZK0Y@590|Salmonella	1236|Gammaproteobacteria
g291	yhaH	yhaH	DUF805 domain-containing protein	hit	S	Protein of unknown function (DUF805)	yhaH	GO:0005575,GO:0005623,GO:0005886,GO:0016020,GO:0044464,GO:0071944	yhaH	220341.16504309	4.23e-91	265.0	COG3152@1|root,COG3152@2|Bacteria,1MZJ4@1224|Proteobacteria,1SA1N@1236|Gammaproteobacteria,3ZM6C@590|Salmonella	1236|Gammaproteobacteria
g292	ftsL	ftsL	cell division protein FtsL	hit	D	Essential cell division protein. May link together the upstream cell division proteins, which are predominantly cytoplasmic, with the downstream cell division proteins, which are predominantly periplasmic	ftsL	GO:0000003,GO:0000910,GO:0005575,GO:0005623,GO:0005886,GO:0005887,GO:0007049,GO:0008150,GO:0009987,GO:0016020,GO:0016021,GO:0019954,GO:0022402,GO:0022414,GO:0031224,GO:0031226,GO:0032153,GO:0032505,GO:0043093,GO:0044425,GO:0044459,GO:0044464,GO:0051301,GO:0071944	ftsL	1080067.BAZH01000004_gene4133	2.77e-78	233.0	COG3116@1|root,COG3116@2|Bacteria,1N9MH@1224|Proteobacteria,1SC7P@1236|Gammaproteobacteria,3WY8G@544|Citrobacter	1236|Gammaproteobacteria
g293	rplL	rplL	50S ribosomal protein L7/L12	hit	J	Forms part of the ribosomal stalk which helps the ribosome interact with GTP-bound translation factors. Is thus essential for accurate translation	rplL	GO:0003674,GO:0003735,GO:0005198,GO:0005488,GO:0005515,GO:0005575,GO:0005622,GO:0005623,GO:0005737,GO:0005829,GO:0005840,GO:0006412,GO:0006518,GO:0006807,GO:0008150,GO:0008152,GO:0009058,GO:0009059,GO:0009987,GO:0010467,GO:0015934,GO:0019538,GO:0022625,GO:0022626,GO:0032991,GO:0034641,GO:0034645,GO:0042802,GO:0042803,GO:0043021,GO:0043022,GO:0043043,GO:0043170,GO:0043226,GO:0043228,GO:0043229,GO:…	rplL	1073999.BN137_707	1.07e-62	194.0	COG0222@1|root,COG0222@2|Bacteria,1RGU4@1224|Proteobacteria,1S5V7@1236|Gammaproteobacteria	1236|Gammaproteobacteria
g294	group_3797		hypothetical protein;Transposase-31 domain-containing protein	hit	S	Putative transposase, YhgA-like	-	-	group_3797	220341.16505636	1.11e-212	589.0	COG5464@1|root,COG5464@2|Bacteria,1MUSP@1224|Proteobacteria,1RNUW@1236|Gammaproteobacteria,3ZJ4Z@590|Salmonella	1236|Gammaproteobacteria
g295	hin	;hin	hypothetical protein;DNA-invertase hin;Resolvase/invertase-type recombinase catalytic domain-containing protein;flagellar phase variation DNA invertase Hin;DNA-invertase;recombinase family protein	hit	L	Site-specific recombinases, DNA invertase Pin homologs	hin	-	hin	637910.ROD_08981	3.83e-106	309.0	COG1961@1|root,COG1961@2|Bacteria,1MXXT@1224|Proteobacteria,1S08N@1236|Gammaproteobacteria	1236|Gammaproteobacteria
g296	siiE	;siiE	Giant non-fimbrial adhesion protein;Ig-like domain-containing protein;Ig-like domain repeat protein;Ig domain protein;hypothetical protein;Large repetitive protein;Ig domain-containing protein;Cadherin domain-containing protein;non-fimbrial adhesin SiiE	hit	Q	Fibronectin type 3 domain	-	-	siiE	90371.CY43_22240	0.0	10364.0	COG2931@1|root,COG4932@1|root,COG2931@2|Bacteria,COG4932@2|Bacteria,1MU7T@1224|Proteobacteria,1RMZW@1236|Gammaproteobacteria,3ZJZS@590|Salmonella	1236|Gammaproteobacteria
g297	caiD	;caiD	Carnitinyl-CoA dehydratase;enoyl-CoA hydratase-related protein;crotonobetainyl-CoA hydratase	hit	H	Catalyzes the reversible dehydration of L-carnitinyl-CoA to crotonobetainyl-CoA	caiD	GO:0003674,GO:0003824,GO:0004300,GO:0006082,GO:0006575,GO:0006577,GO:0006579,GO:0006629,GO:0006631,GO:0006635,GO:0006807,GO:0008150,GO:0008152,GO:0008809,GO:0009056,GO:0009062,GO:0009437,GO:0009987,GO:0016042,GO:0016054,GO:0016829,GO:0016835,GO:0016836,GO:0016853,GO:0016854,GO:0016856,GO:0019395,GO:0019752,GO:0030258,GO:0032787,GO:0034440,GO:0034641,GO:0042219,GO:0042413,GO:0043436,GO:0044237,GO:…	caiD	220341.16501353	1.69e-186	518.0	COG1024@1|root,COG1024@2|Bacteria,1MWZC@1224|Proteobacteria,1RR3Z@1236|Gammaproteobacteria,3ZJ7T@590|Salmonella	1236|Gammaproteobacteria
g298	group_3788	doc	type II toxin-antitoxin system death-on-curing family toxin	hit	S	Death ON curing protein	doc	-	group_3788	90371.CY43_18480	3.1e-80	238.0	COG3654@1|root,COG3654@2|Bacteria,1N1FW@1224|Proteobacteria,1S3YM@1236|Gammaproteobacteria	1236|Gammaproteobacteria
g299	ssaM	ssaM	SPI-2 type III secretion system apparatus protein SsaM	hit	-	-	ssaM	-	ssaM	90371.CY43_07190	3.62e-88	258.0	2CKPH@1|root,32SCS@2|Bacteria,1N102@1224|Proteobacteria,1SA3B@1236|Gammaproteobacteria,3ZN99@590|Salmonella	1236|Gammaproteobacteria
g300	sufA	sufA	Fe-S cluster assembly scaffold SufA	hit	S	Iron-sulphur cluster biosynthesis	sufA	GO:0003674,GO:0005488,GO:0005506,GO:0006790,GO:0006807,GO:0006950,GO:0006979,GO:0008150,GO:0008152,GO:0008198,GO:0009987,GO:0010467,GO:0016043,GO:0016226,GO:0019538,GO:0022607,GO:0031163,GO:0043167,GO:0043169,GO:0043170,GO:0044085,GO:0044237,GO:0044238,GO:0046872,GO:0046914,GO:0048037,GO:0050896,GO:0051186,GO:0051536,GO:0051537,GO:0051540,GO:0051604,GO:0071704,GO:0071840,GO:0097428,GO:1901564	sufA	220341.16502834	4.23e-87	255.0	COG0316@1|root,COG0316@2|Bacteria,1RH6T@1224|Proteobacteria,1S5XD@1236|Gammaproteobacteria,3ZM7Q@590|Salmonella	1236|Gammaproteobacteria
g301	dgkA	dgkA	diacylglycerol kinase	hit	M	Recycling of diacylglycerol produced during the turnover of membrane phospholipid	dgkA	GO:0003674,GO:0003824,GO:0004143,GO:0005575,GO:0005623,GO:0005886,GO:0006629,GO:0006644,GO:0006650,GO:0006654,GO:0006793,GO:0006796,GO:0008150,GO:0008152,GO:0008610,GO:0008654,GO:0009058,GO:0009314,GO:0009411,GO:0009416,GO:0009628,GO:0009987,GO:0016020,GO:0016301,GO:0016310,GO:0016740,GO:0016772,GO:0016773,GO:0019637,GO:0044237,GO:0044238,GO:0044249,GO:0044255,GO:0044464,GO:0045017,GO:0046473,GO:…	dgkA	220341.16505224	1.04e-78	234.0	COG0818@1|root,COG0818@2|Bacteria,1MZ3Q@1224|Proteobacteria,1S92I@1236|Gammaproteobacteria,3ZMCC@590|Salmonella	1236|Gammaproteobacteria
g302	group_3784		DUF1090 domain-containing protein	hit	S	Protein of unknown function (DUF1090)	yqjC	-	group_3784	220341.16504303	8.77e-62	191.0	COG1422@1|root,COG1422@2|Bacteria,1NAAB@1224|Proteobacteria,1SE1J@1236|Gammaproteobacteria,3ZMAB@590|Salmonella	1236|Gammaproteobacteria
g303	waaK	waaK;	Lipopolysaccharide 12-N-acetylglucosaminetransferase	hit	M	Glycosyl transferases group 1	waaK	-	waaK	220341.16504901	1.88e-273	748.0	COG0438@1|root,COG0438@2|Bacteria,1PCJT@1224|Proteobacteria,1RYHI@1236|Gammaproteobacteria,3ZKKG@590|Salmonella	1236|Gammaproteobacteria
g304	gltA	gltA;	citrate synthase;Citrate synthase (unknown stereospecificity)	hit	H	Citrate synthase, C-terminal domain	gltA	GO:0003674,GO:0003824,GO:0004108,GO:0005488,GO:0005515,GO:0005575,GO:0005622,GO:0005623,GO:0005737,GO:0005829,GO:0006082,GO:0006091,GO:0006099,GO:0006101,GO:0008150,GO:0008152,GO:0009060,GO:0009987,GO:0015980,GO:0016740,GO:0016746,GO:0016999,GO:0017144,GO:0019752,GO:0036440,GO:0042802,GO:0043436,GO:0044237,GO:0044238,GO:0044281,GO:0044424,GO:0044444,GO:0044464,GO:0045333,GO:0046912,GO:0055114,GO:…	gltA	90371.CY43_03940	0.0	868.0	COG0372@1|root,COG0372@2|Bacteria,1MUKX@1224|Proteobacteria,1RNDK@1236|Gammaproteobacteria,3ZJMU@590|Salmonella	1236|Gammaproteobacteria
g305	abrB	;abrB	Putative regulator AbrB;Transport protein;Ammonia monooxygenase;AbrB family transcriptional regulator;Membrane protein AbrB duplication;hypothetical protein	hit	S	Transition state regulatory protein AbrB	abrB	GO:0005575,GO:0005623,GO:0005886,GO:0016020,GO:0044464,GO:0071944	abrB	90371.CY43_03935	8.14e-224	620.0	COG3180@1|root,COG3180@2|Bacteria,1MUFS@1224|Proteobacteria,1RPMJ@1236|Gammaproteobacteria,3ZIUF@590|Salmonella	1236|Gammaproteobacteria
g306	nei	;nei	Endonuclease VIII;DNA-(apurinic or apyrimidinic site) lyase;endonuclease VIII	hit	L	Involved in base excision repair of DNA damaged by oxidation or by mutagenic agents. Acts as DNA glycosylase that recognizes and removes damaged bases. Has a preference for oxidized pyrimidines, such as thymine glycol, 5,6-dihydrouracil and 5,6-dihydrothymine. Has AP (apurinic apyrimidinic) lyase activity and introduces nicks in the DNA strand. Cleaves the DNA backbone by beta-delta elimination t…	nei	GO:0000702,GO:0000703,GO:0003674,GO:0003676,GO:0003677,GO:0003684,GO:0003824,GO:0003906,GO:0005488,GO:0006139,GO:0006259,GO:0006281,GO:0006284,GO:0006725,GO:0006807,GO:0006950,GO:0006974,GO:0008150,GO:0008152,GO:0008270,GO:0009987,GO:0016787,GO:0016798,GO:0016799,GO:0019104,GO:0033554,GO:0034641,GO:0043167,GO:0043169,GO:0043170,GO:0044237,GO:0044238,GO:0044260,GO:0046483,GO:0046872,GO:0046914,GO:…	nei	90371.CY43_03930	9.1e-192	531.0	COG0266@1|root,COG0266@2|Bacteria,1N1J5@1224|Proteobacteria,1RNS9@1236|Gammaproteobacteria,3ZKMD@590|Salmonella	1236|Gammaproteobacteria
g307	group_3774	;gsiA	hypothetical protein;ATP-binding cassette domain-containing protein;Glutathione transporter ATP-binding protein;Oligopeptide/dipeptide ABC transporter ATPase;glutathione ABC transporter ATP-binding protein GsiA	hit	P	Oligopeptide/dipeptide transporter, C-terminal region	gsiA	GO:0000166,GO:0003674,GO:0005488,GO:0005524,GO:0005575,GO:0005623,GO:0005886,GO:0005887,GO:0008144,GO:0016020,GO:0016021,GO:0017076,GO:0030554,GO:0031224,GO:0031226,GO:0032553,GO:0032555,GO:0032559,GO:0035639,GO:0036094,GO:0043167,GO:0043168,GO:0044425,GO:0044459,GO:0044464,GO:0071944,GO:0097159,GO:0097367,GO:1901265,GO:1901363	group_3774	90371.CY43_04545	0.0	1192.0	COG1123@1|root,COG4172@2|Bacteria,1MU09@1224|Proteobacteria,1RMEI@1236|Gammaproteobacteria,3ZM0J@590|Salmonella	1236|Gammaproteobacteria
g308	oppB	;oppB	hypothetical protein;oligopeptide ABC transporter permease OppB	hit	P	Binding-protein-dependent transport system inner membrane component	oppB	GO:0003674,GO:0005215,GO:0005575,GO:0005623,GO:0005886,GO:0006810,GO:0008150,GO:0016020,GO:0022857,GO:0044464,GO:0051179,GO:0051234,GO:0055085,GO:0071944	oppB	90371.CY43_08920	5.84e-202	563.0	COG0601@1|root,COG0601@2|Bacteria,1MU8Z@1224|Proteobacteria,1RNJ1@1236|Gammaproteobacteria,3ZKWB@590|Salmonella	1236|Gammaproteobacteria
g309	group_3767	;rbsK	hypothetical protein;Phosphomethylpyrimidine kinase;Ribokinase	hit	H	Catalyzes the phosphorylation of ribose at O-5 in a reaction requiring ATP and magnesium. The resulting D-ribose-5- phosphate can then be used either for sythesis of nucleotides, histidine, and tryptophan, or as a component of the pentose phosphate pathway	-	-	group_3767	90371.CY43_07030	1.35e-282	773.0	COG0524@1|root,COG1349@1|root,COG0524@2|Bacteria,COG1349@2|Bacteria,1MV5B@1224|Proteobacteria,1SYHQ@1236|Gammaproteobacteria,3ZN79@590|Salmonella	1236|Gammaproteobacteria
g310	yedE	;yedE	Putative inner membrane protein;YeeE/YedE family protein;selenium metabolism membrane protein YedE/FdhT	hit	S	Sulphur transport	yedE	GO:0005575,GO:0005623,GO:0005886,GO:0005887,GO:0016020,GO:0016021,GO:0031224,GO:0031226,GO:0044425,GO:0044459,GO:0044464,GO:0071944	yedE	220341.16503206	1.16e-298	814.0	COG2391@1|root,COG2391@2|Bacteria,1PF9B@1224|Proteobacteria,1RNE8@1236|Gammaproteobacteria,3ZM21@590|Salmonella	1236|Gammaproteobacteria
g311	group_3761	;mngR	GntR family transcriptional regulator	hit	K	UTRA domain	-	-	group_3761	220341.16504840	6.35e-175	488.0	COG2188@1|root,COG2188@2|Bacteria,1R5W1@1224|Proteobacteria,1RQDC@1236|Gammaproteobacteria,3ZMYK@590|Salmonella	1236|Gammaproteobacteria
g312	qmcA	;qmcA	Protein QmcA	hit	O	prohibitin homologues	qmcA	GO:0005575,GO:0005623,GO:0005886,GO:0016020,GO:0044464,GO:0071944	qmcA	90371.CY43_02845	1.56e-158	451.0	COG0330@1|root,COG0330@2|Bacteria,1MUM8@1224|Proteobacteria,1RNW8@1236|Gammaproteobacteria,3ZIX3@590|Salmonella	1236|Gammaproteobacteria
g313	group_3757	;fucO	Lactaldehyde reductase (Propanediol oxidoreductase);lactaldehyde reductase;L-12-propanediol oxidoreductase	hit	C	Iron-containing alcohol dehydrogenase	fucO	GO:0003674,GO:0003824,GO:0004022,GO:0005488,GO:0005506,GO:0005575,GO:0005622,GO:0005623,GO:0005737,GO:0005829,GO:0005975,GO:0005996,GO:0006004,GO:0006066,GO:0008150,GO:0008152,GO:0008198,GO:0008912,GO:0009056,GO:0016052,GO:0016491,GO:0016614,GO:0016616,GO:0019299,GO:0019301,GO:0019317,GO:0019318,GO:0019320,GO:0019751,GO:0034311,GO:0034313,GO:0042354,GO:0042355,GO:0042844,GO:0042846,GO:0043167,GO:…	group_3757	90371.CY43_15510	1.43e-273	748.0	COG1454@1|root,COG1454@2|Bacteria,1MVPH@1224|Proteobacteria,1RMVU@1236|Gammaproteobacteria,3ZMV4@590|Salmonella	1236|Gammaproteobacteria
g314	group_3754	;yfcC	hypothetical protein;YfcC family protein;putative membrane transporter YfcC affects glyoxylate shunt;C4-dicarboxylate anaerobic carrier;Putative C4-dicarboxylate transport membrane protein;C4-dicarboxylate ABC transporter	hit	E	Reversibly catalyzes the transfer of the carbamoyl group from carbamoyl phosphate (CP) to the N(epsilon) atom of ornithine (ORN) to produce L-citrulline	argF	GO:0000050,GO:0003674,GO:0003824,GO:0004585,GO:0005575,GO:0005622,GO:0005623,GO:0005737,GO:0006082,GO:0006520,GO:0006525,GO:0006526,GO:0006591,GO:0006807,GO:0008150,GO:0008152,GO:0008652,GO:0009058,GO:0009064,GO:0009084,GO:0009987,GO:0016053,GO:0016740,GO:0016741,GO:0016743,GO:0019627,GO:0019752,GO:0034641,GO:0042450,GO:0043436,GO:0043603,GO:0043604,GO:0044237,GO:0044238,GO:0044249,GO:0044271,GO:…	group_3754	90371.CY43_23255	8.85e-233	655.0	COG0078@1|root,COG0078@2|Bacteria,1MUFM@1224|Proteobacteria,1RQ59@1236|Gammaproteobacteria,3ZISB@590|Salmonella	1236|Gammaproteobacteria
g315	fre	;fre	NAD(P)H-flavin reductase;FMN reductase	hit	C	Oxidoreductase FAD-binding domain	fre	GO:0003674,GO:0003824,GO:0005575,GO:0005622,GO:0005623,GO:0005737,GO:0005829,GO:0006807,GO:0006950,GO:0006979,GO:0008047,GO:0008150,GO:0008152,GO:0009987,GO:0016491,GO:0016645,GO:0016646,GO:0019538,GO:0030091,GO:0030234,GO:0042602,GO:0043085,GO:0043170,GO:0044093,GO:0044237,GO:0044238,GO:0044260,GO:0044267,GO:0044424,GO:0044444,GO:0044464,GO:0050790,GO:0050896,GO:0052875,GO:0055114,GO:0065007,GO:…	fre	90371.CY43_20820	6.12e-166	464.0	COG0543@1|root,COG0543@2|Bacteria,1MV72@1224|Proteobacteria,1RPH5@1236|Gammaproteobacteria,3ZJPP@590|Salmonella	1236|Gammaproteobacteria
g316	mglC	;mglC	Galactose/methyl galactoside ABC transport system;Galactoside transport system permease protein MglC;Galactoside transporter permease MglC;galactose/methyl galactoside ABC transporter permease MglC;Galactoside transport system permease protein mglC	hit	G	Branched-chain amino acid transport system / permease component	mglC	GO:0003674,GO:0005215,GO:0005354,GO:0005575,GO:0005623,GO:0005886,GO:0006810,GO:0006950,GO:0006974,GO:0008150,GO:0008643,GO:0008645,GO:0009987,GO:0015144,GO:0015145,GO:0015149,GO:0015592,GO:0015749,GO:0015757,GO:0015765,GO:0016020,GO:0016021,GO:0022857,GO:0031224,GO:0033554,GO:0034219,GO:0044425,GO:0044464,GO:0050896,GO:0051119,GO:0051179,GO:0051234,GO:0051716,GO:0055085,GO:0071702,GO:0071944,GO:…	mglC	90371.CY43_11765	1.31e-223	618.0	COG4211@1|root,COG4211@2|Bacteria,1N621@1224|Proteobacteria,1RP8Q@1236|Gammaproteobacteria,3ZK6H@590|Salmonella	1236|Gammaproteobacteria
g317	yihO	;yihO	Putative membrane permease;hypothetical protein;Membrane permease;MFS transporter;Putative sulfoquinovose importer;Permease	hit	G	MFS/sugar transport protein	yihO	GO:0003674,GO:0005215,GO:0005575,GO:0005623,GO:0005886,GO:0006810,GO:0006811,GO:0006812,GO:0008150,GO:0008324,GO:0015075,GO:0015291,GO:0015293,GO:0015294,GO:0015318,GO:0016020,GO:0022804,GO:0022857,GO:0022890,GO:0034220,GO:0044464,GO:0051179,GO:0051234,GO:0055085,GO:0071944,GO:0072348,GO:0098655,GO:1901682	yihO	90371.CY43_20995	0.0	941.0	COG2211@1|root,COG2211@2|Bacteria,1QPAN@1224|Proteobacteria,1S0SW@1236|Gammaproteobacteria,3ZM28@590|Salmonella	1236|Gammaproteobacteria
g318	rplN	rplN	50S ribosomal protein L14	hit	J	Binds to 23S rRNA. Forms part of two intersubunit bridges in the 70S ribosome	rplN	GO:0003674,GO:0003676,GO:0003723,GO:0003735,GO:0005198,GO:0005488,GO:0005575,GO:0005622,GO:0005623,GO:0005737,GO:0005829,GO:0005840,GO:0006412,GO:0006518,GO:0006807,GO:0008150,GO:0008152,GO:0009058,GO:0009059,GO:0009987,GO:0010467,GO:0015934,GO:0019538,GO:0019843,GO:0022625,GO:0022626,GO:0032991,GO:0034641,GO:0034645,GO:0043043,GO:0043170,GO:0043226,GO:0043228,GO:0043229,GO:0043232,GO:0043603,GO:…	rplN	1028307.EAE_04905	4.93e-82	243.0	COG0093@1|root,COG0093@2|Bacteria,1RCWZ@1224|Proteobacteria,1S3Z3@1236|Gammaproteobacteria,3X27V@547|Enterobacter	1236|Gammaproteobacteria
g319	group_3741		Helix-turn-helix domain-containing protein	hit	L	Helix-turn-helix domain	yfeD	-	group_3741	90371.CY43_12915	3.21e-84	248.0	COG3415@1|root,COG3415@2|Bacteria,1MYR7@1224|Proteobacteria,1S85P@1236|Gammaproteobacteria,3ZM56@590|Salmonella	1236|Gammaproteobacteria
g320	group_3740		DUF2500 domain-containing protein	hit	S	Protein of unknown function (DUF2500)	yhhM	-	group_3740	90371.CY43_18555	5.83e-56	177.0	2AHZY@1|root,318D9@2|Bacteria,1RDRA@1224|Proteobacteria,1S5XK@1236|Gammaproteobacteria,3ZM9U@590|Salmonella	1236|Gammaproteobacteria
g321	group_3729		Cytoplasmic protein;Putative cytoplasmic protein;cytoplasmic protein	hit	L	Transposase	-	-	group_3729	90371.CY43_21455	1.21e-295	803.0	COG3677@1|root,COG3677@2|Bacteria,1R6WY@1224|Proteobacteria,1S1MJ@1236|Gammaproteobacteria,3ZKER@590|Salmonella	1236|Gammaproteobacteria
g322	ydeE	ydeE;	efflux MFS transporter YdeE;MFS domain-containing protein	hit	EGP	Major Facilitator Superfamily	ydeE	GO:0003674,GO:0005215,GO:0005575,GO:0005623,GO:0005886,GO:0006810,GO:0006857,GO:0008150,GO:0015833,GO:0016020,GO:0022857,GO:0035442,GO:0035672,GO:0035673,GO:0042886,GO:0042887,GO:0042938,GO:0044464,GO:0051179,GO:0051234,GO:0055085,GO:0071702,GO:0071705,GO:0071916,GO:0071944,GO:1904680	ydeE	90371.CY43_07725	3.62e-269	738.0	COG0477@1|root,COG2814@2|Bacteria,1N0KT@1224|Proteobacteria,1RYZC@1236|Gammaproteobacteria,3ZKXX@590|Salmonella	1236|Gammaproteobacteria
g323	group_3713		Dihydroorotase;Metallo-dependent hydrolase;metallo-dependent hydrolase;hypothetical protein	hit	S	Amidohydrolase family	-	-	group_3713	90371.CY43_22995	5.06e-281	768.0	COG3964@1|root,COG3964@2|Bacteria,1PH8X@1224|Proteobacteria,1SZS4@1236|Gammaproteobacteria,3ZJMA@590|Salmonella	1236|Gammaproteobacteria
g324	cysB	;cysB	LysR substrate-binding domain-containing protein;CysB family transcriptional regulator;HTH-type transcriptional regulator CysB	hit	K	LysR substrate binding domain	cysB	GO:0003674,GO:0003676,GO:0003677,GO:0005488,GO:0005515,GO:0005575,GO:0005622,GO:0005623,GO:0005737,GO:0005829,GO:0008150,GO:0009314,GO:0009628,GO:0010165,GO:0010212,GO:0042802,GO:0044424,GO:0044444,GO:0044464,GO:0050896,GO:0097159,GO:1901363	cysB	220341.16502461	8.71e-232	638.0	COG0583@1|root,COG0583@2|Bacteria,1MU8N@1224|Proteobacteria,1RN7T@1236|Gammaproteobacteria,3ZJ6W@590|Salmonella	1236|Gammaproteobacteria
g325	group_3704	;yobV	hypothetical protein;DeoR family transcriptional regulator;putative DNA-binding transcriptional regulator YobV contains HTH and WYL domains;DNA-binding transcriptional regulator	hit	K	WYL domain	-	-	group_3704	220341.16501679	9.03e-162	453.0	COG2378@1|root,COG2378@2|Bacteria,1MXS8@1224|Proteobacteria,1S4WF@1236|Gammaproteobacteria,3ZN8H@590|Salmonella	1236|Gammaproteobacteria
g326	livH	;livH	High-affinity branched-chain amino acid transport system permease livH;high-affinity branched-chain amino acid ABC transporter permease LivH	hit	E	Branched-chain amino acid transport system / permease component	livH	GO:0003333,GO:0003674,GO:0005215,GO:0005304,GO:0005342,GO:0005575,GO:0005623,GO:0005886,GO:0005887,GO:0006810,GO:0006811,GO:0006812,GO:0006820,GO:0006855,GO:0006865,GO:0008150,GO:0008324,GO:0008509,GO:0008514,GO:0015075,GO:0015171,GO:0015173,GO:0015175,GO:0015179,GO:0015188,GO:0015190,GO:0015192,GO:0015238,GO:0015318,GO:0015658,GO:0015711,GO:0015801,GO:0015803,GO:0015804,GO:0015807,GO:0015818,GO:…	livH	220341.16505046	4.64e-203	564.0	COG0559@1|root,COG0559@2|Bacteria,1MU25@1224|Proteobacteria,1RNDV@1236|Gammaproteobacteria,3ZIU7@590|Salmonella	1236|Gammaproteobacteria
g327	clpA	clpA;	ATP-dependent Clp protease ATP-binding subunit ClpA;ATP-dependent Clp protease ATP-binding subunit	hit	O	Bacterial TniB protein	clpA	GO:0000166,GO:0003674,GO:0003824,GO:0004176,GO:0005488,GO:0005524,GO:0005575,GO:0005622,GO:0005623,GO:0005737,GO:0005829,GO:0006508,GO:0006807,GO:0006950,GO:0006979,GO:0008144,GO:0008150,GO:0008152,GO:0008233,GO:0009987,GO:0016462,GO:0016787,GO:0016817,GO:0016818,GO:0016887,GO:0017076,GO:0017111,GO:0019538,GO:0030554,GO:0032553,GO:0032555,GO:0032559,GO:0035639,GO:0036094,GO:0042623,GO:0043167,GO:…	clpA	90371.CY43_04845	0.0	1469.0	COG0542@1|root,COG0542@2|Bacteria,1MV8B@1224|Proteobacteria,1RMH3@1236|Gammaproteobacteria,3ZJWC@590|Salmonella	1236|Gammaproteobacteria
g328	rclA	;rclA	Dihydrolipoamide dehydrogenase Mercuric ion reductase PF00070 family FAD-dependent NAD(P)-disulphide oxidoreductase;FAD-dependent oxidoreductase;Putative pyridine nucleotide-disulfide oxidoreductase;reactive chlorine resistance oxidoreductase RclA;Pyridine nucleotide-disulfide oxidoreductase;Dihydrolipoamide dehydrogenase	hit	C	Pyridine nucleotide-disulphide oxidoreductase, dimerisation domain	ykgC	GO:0000302,GO:0000305,GO:0001101,GO:0003674,GO:0003824,GO:0005575,GO:0005622,GO:0005623,GO:0005737,GO:0006950,GO:0006979,GO:0008150,GO:0008152,GO:0009636,GO:0009987,GO:0010035,GO:0016491,GO:0016667,GO:0019725,GO:0042221,GO:0042592,GO:0044424,GO:0044464,GO:0045454,GO:0050789,GO:0050794,GO:0050896,GO:0051716,GO:0055114,GO:0065007,GO:0065008,GO:0070887,GO:0097237,GO:0098754,GO:0098869,GO:1901530,GO:…	rclA	220341.16501822	1.18e-309	845.0	COG1249@1|root,COG1249@2|Bacteria,1MU2U@1224|Proteobacteria,1RQTU@1236|Gammaproteobacteria,3ZJ2X@590|Salmonella	1236|Gammaproteobacteria
g329	group_3686		hypothetical protein;fimbrial protein	hit	NU	Fimbrial protein	-	-	group_3686	220341.16501471	1.11e-126	361.0	COG3539@1|root,COG3539@2|Bacteria,1Q00N@1224|Proteobacteria,1TBYE@1236|Gammaproteobacteria,3ZMKT@590|Salmonella	1236|Gammaproteobacteria
g330	rpsL	rpsL	30S ribosomal protein S12	hit	J	Interacts with and stabilizes bases of the 16S rRNA that are involved in tRNA selection in the A site and with the mRNA backbone. Located at the interface of the 30S and 50S subunits, it traverses the body of the 30S subunit contacting proteins on the other side and probably holding the rRNA structure together. The combined cluster of proteins S8, S12 and S17 appears to hold together the shoulder…	rpsL	GO:0000372,GO:0000375,GO:0000376,GO:0003674,GO:0003676,GO:0003723,GO:0003735,GO:0005198,GO:0005488,GO:0005575,GO:0005622,GO:0005623,GO:0005737,GO:0005829,GO:0005840,GO:0006139,GO:0006396,GO:0006412,GO:0006518,GO:0006725,GO:0006807,GO:0008150,GO:0008152,GO:0008380,GO:0009058,GO:0009059,GO:0009893,GO:0009987,GO:0010467,GO:0010468,GO:0010604,GO:0010628,GO:0015935,GO:0016070,GO:0019219,GO:0019222,GO:…	rpsL	1005994.GTGU_03045	9.54e-85	249.0	COG0048@1|root,COG0048@2|Bacteria,1RCWY@1224|Proteobacteria,1S3WB@1236|Gammaproteobacteria	1236|Gammaproteobacteria
g331	ycfL	ycfL	DUF1425 domain-containing protein	hit	S	Protein of unknown function (DUF1425)	ycfL	GO:0006950,GO:0006974,GO:0008150,GO:0009987,GO:0033554,GO:0050896,GO:0051716	ycfL	90371.CY43_06145	1.58e-83	246.0	COG5633@1|root,COG5633@2|Bacteria,1RED7@1224|Proteobacteria,1S4SB@1236|Gammaproteobacteria,3ZMAU@590|Salmonella	1236|Gammaproteobacteria
g332	mglA	;mglA	Galactose/methyl galactoside import ATP-binding protein MglA;galactose/methyl galactoside ABC transporter ATP-binding protein MglA	hit	G	Part of the ABC transporter complex MglABC involved in galactose methyl galactoside import. Responsible for energy coupling to the transport system	mglA	GO:0000166,GO:0003674,GO:0005215,GO:0005354,GO:0005488,GO:0005524,GO:0005575,GO:0005623,GO:0005886,GO:0006810,GO:0006950,GO:0006974,GO:0008144,GO:0008150,GO:0008643,GO:0008645,GO:0009987,GO:0015144,GO:0015145,GO:0015149,GO:0015592,GO:0015749,GO:0015757,GO:0015765,GO:0016020,GO:0017076,GO:0022857,GO:0030554,GO:0032553,GO:0032555,GO:0032559,GO:0033554,GO:0034219,GO:0035639,GO:0036094,GO:0043167,GO:…	mglA	90371.CY43_11770	0.0	991.0	COG1129@1|root,COG1129@2|Bacteria,1MU22@1224|Proteobacteria,1RMCH@1236|Gammaproteobacteria,3ZJXE@590|Salmonella	1236|Gammaproteobacteria
g333	comEA	comEA	Type II secretion system (T2SS) protein K	hit	L	Type II secretion system (T2SS), protein K	comEA	GO:0005575,GO:0005623,GO:0030288,GO:0030313,GO:0031975,GO:0042597,GO:0044464	comEA	220341.16501724	2.73e-75	226.0	COG1555@1|root,COG1555@2|Bacteria,1N6Q3@1224|Proteobacteria,1SC7U@1236|Gammaproteobacteria,3ZM9Q@590|Salmonella	1236|Gammaproteobacteria
g334	mglB	;mglB	hypothetical protein;Galactose/methyl galactoside ABC transport;galactose/glucose ABC transporter substrate-binding protein MglB;D-galactose ABC transporter substrate-binding protein	hit	G	Periplasmic binding protein domain	mglB	GO:0005575,GO:0005623,GO:0006810,GO:0006935,GO:0008150,GO:0008643,GO:0008645,GO:0009605,GO:0015749,GO:0015757,GO:0015765,GO:0030288,GO:0030313,GO:0031975,GO:0034219,GO:0040011,GO:0042221,GO:0042330,GO:0042597,GO:0044464,GO:0050896,GO:0051179,GO:0051234,GO:0055085,GO:0071702,GO:1901264,GO:1901656	mglB	90371.CY43_11775	1.02e-234	646.0	COG1879@1|root,COG1879@2|Bacteria,1MWGU@1224|Proteobacteria,1RPE9@1236|Gammaproteobacteria,3ZKEB@590|Salmonella	1236|Gammaproteobacteria
g335	group_3682		HTH Mu-type domain-containing protein	hit	-	-	-	-	group_3682	90371.CY43_12700	1.71e-87	256.0	2E5YU@1|root,330NE@2|Bacteria,1NDNJ@1224|Proteobacteria,1SEI6@1236|Gammaproteobacteria,3ZMQS@590|Salmonella	1236|Gammaproteobacteria
g336	group_3673		hypothetical protein;Radical SAM/SPASM domain-containing protein	hit	-	-	-	-	group_3673	220341.16504726	8.29e-223	612.0	COG2100@1|root,COG2100@2|Bacteria,1Q7DP@1224|Proteobacteria,1T2KU@1236|Gammaproteobacteria,3ZN8A@590|Salmonella	1236|Gammaproteobacteria
g337	group_3669	;uhpC	hypothetical protein;MFS transporter	hit	G	Major Facilitator Superfamily	-	-	group_3669	90371.CY43_11815	1.14e-313	855.0	COG2271@1|root,COG2271@2|Bacteria,1R4XT@1224|Proteobacteria,1S18P@1236|Gammaproteobacteria,3ZM3B@590|Salmonella	1236|Gammaproteobacteria
g338	dksA	dksA;	RNA polymerase-binding protein DksA;DnaK suppressor protein	hit	K	Transcription factor that acts by binding directly to the RNA polymerase (RNAP). Required for negative regulation of rRNA expression and positive regulation of several amino acid biosynthesis promoters. Also required for regulation of fis expression	dksA	GO:0005575,GO:0005622,GO:0005623,GO:0005737,GO:0005829,GO:0044424,GO:0044444,GO:0044464	dksA	1045856.EcWSU1_00755	8.27e-101	293.0	COG1734@1|root,COG1734@2|Bacteria,1RD08@1224|Proteobacteria,1S47H@1236|Gammaproteobacteria,3X0Q3@547|Enterobacter	1236|Gammaproteobacteria
g339	group_3667		hypothetical protein;arylsulfatase;Arylsulfotransferase;Arylsulfotran-N domain-containing protein	hit	M	Arylsulfotransferase Ig-like domain	-	-	group_3667	220341.16501322	0.0	1147.0	28MBK@1|root,2ZAQ1@2|Bacteria,1R5CV@1224|Proteobacteria,1RQPD@1236|Gammaproteobacteria,3ZK57@590|Salmonella	1236|Gammaproteobacteria
g340	cspJ	;cspJ	cold shock domain-containing protein;Cold shock-like protein CspJ	hit	K	Cold shock protein domain	cspG	GO:0005575,GO:0005622,GO:0005623,GO:0005737,GO:0005829,GO:0006950,GO:0008150,GO:0009266,GO:0009409,GO:0009628,GO:0044424,GO:0044444,GO:0044464,GO:0050896	cspJ	90371.CY43_10500	1.47e-45	146.0	COG1278@1|root,COG1278@2|Bacteria,1N6Q5@1224|Proteobacteria,1SCA7@1236|Gammaproteobacteria,3ZNBY@590|Salmonella	1236|Gammaproteobacteria
g341	group_3621	hinT	purine nucleoside phosphoramidase	hit	FG	Hydrolyzes purine nucleotide phosphoramidates, including adenosine 5'monophosphoramidate (AMP-NH2), adenosine 5'monophosphomorpholidate (AMP-morpholidate), guanosine 5'monophosphomorpholidate (GMP-morpholidate) and tryptamine 5'guanosine monophosphate (TpGd). Hydrolyzes lysyl-AMP (AMP-N-epsilon-(N-alpha- acetyl lysine methyl ester)) generated by lysine--tRNA ligase, and lysyl-GMP (GMP-N-epsilon-(…	hinT	GO:0003674,GO:0003824,GO:0005575,GO:0005622,GO:0005623,GO:0005737,GO:0005829,GO:0006082,GO:0006520,GO:0006522,GO:0006524,GO:0006807,GO:0008150,GO:0008152,GO:0009056,GO:0009063,GO:0009078,GO:0009080,GO:0009987,GO:0016054,GO:0016787,GO:0016810,GO:0016811,GO:0019478,GO:0019752,GO:0043436,GO:0043530,GO:0044237,GO:0044238,GO:0044248,GO:0044281,GO:0044282,GO:0044424,GO:0044444,GO:0044464,GO:0046144,GO:…	group_3621	754331.AEME01000001_gene1410	7.23e-82	243.0	COG0537@1|root,COG0537@2|Bacteria,1RDCJ@1224|Proteobacteria,1S3QE@1236|Gammaproteobacteria,3XPPK@561|Escherichia	1236|Gammaproteobacteria
g342	group_3620		Uncharacterized protein YjeN	hit	-	-	yjeN	-	group_3620	220341.16505476	1.52e-86	254.0	2F8BX@1|root,340QY@2|Bacteria,1NZ1P@1224|Proteobacteria,1SI9F@1236|Gammaproteobacteria	1236|Gammaproteobacteria
g343	fliO	fliO	flagellar type III secretion system protein FliO	hit	N	Flagellar biosynthesis protein, FliO	fliO	-	fliO	220341.16503219	3.72e-78	233.0	COG3190@1|root,COG3190@2|Bacteria,1N79Z@1224|Proteobacteria,1SCKP@1236|Gammaproteobacteria,3ZMD3@590|Salmonella	1236|Gammaproteobacteria
g344	group_3617		Putative inner membrane protein of Enterobacteriaceae	hit	S	Putative inner membrane protein of Enterobacteriaceae	ybjM	GO:0005575,GO:0005623,GO:0005886,GO:0016020,GO:0044464,GO:0071944	group_3617	90371.CY43_04665	1.3e-87	257.0	2AKS6@1|root,31BJ4@2|Bacteria,1RJKC@1224|Proteobacteria,1S7JU@1236|Gammaproteobacteria,3ZMCG@590|Salmonella	1236|Gammaproteobacteria
g345	apaG	apaG	Co2+/Mg2+ efflux protein ApaG	hit	P	ApaG domain	apaG	-	apaG	1197719.A464_79	1.3e-87	257.0	COG2967@1|root,COG2967@2|Bacteria,1MZ2Z@1224|Proteobacteria,1S8SE@1236|Gammaproteobacteria,3ZM8D@590|Salmonella	1236|Gammaproteobacteria
g346	sodC	;sodC	Superoxide dismutase [Cu-Zn] 2;superoxide dismutase [Cu-Zn] SodC	hit	P	Destroys radicals which are normally produced within the cells and which are toxic to biological systems	sodC	GO:0000302,GO:0000303,GO:0000305,GO:0003674,GO:0003824,GO:0004784,GO:0005488,GO:0005507,GO:0005575,GO:0005576,GO:0005615,GO:0005623,GO:0006801,GO:0006950,GO:0006979,GO:0008150,GO:0008152,GO:0008270,GO:0009636,GO:0009987,GO:0010035,GO:0016209,GO:0016491,GO:0016721,GO:0019430,GO:0030288,GO:0030313,GO:0031975,GO:0033554,GO:0034599,GO:0034614,GO:0042221,GO:0042597,GO:0043167,GO:0043169,GO:0044237,GO:…	sodC	220341.16502769	8.11e-121	345.0	COG2032@1|root,COG2032@2|Bacteria,1RGV4@1224|Proteobacteria,1S6KW@1236|Gammaproteobacteria,3ZIQW@590|Salmonella	1236|Gammaproteobacteria
g347	dprA	;dprA	hypothetical protein;DNA-protecting protein DprA;DNA protecting protein DprA	hit	LU	DNA recombination-mediator protein A	smf	-	dprA	220341.16505184	1.48e-271	743.0	COG0758@1|root,COG0758@2|Bacteria,1MVF6@1224|Proteobacteria,1RPJE@1236|Gammaproteobacteria,3ZIYA@590|Salmonella	1236|Gammaproteobacteria
g348	xthA	;xthA	Exodeoxyribonuclease III;Exonuclease III;exodeoxyribonuclease III	hit	L	Endonuclease/Exonuclease/phosphatase family	xthA	GO:0003674,GO:0003824,GO:0004518,GO:0004527,GO:0004529,GO:0004536,GO:0005575,GO:0005622,GO:0005623,GO:0005737,GO:0005829,GO:0006139,GO:0006259,GO:0006725,GO:0006807,GO:0006950,GO:0006974,GO:0008150,GO:0008152,GO:0008853,GO:0009987,GO:0016787,GO:0016788,GO:0016796,GO:0016895,GO:0033554,GO:0034641,GO:0043170,GO:0044237,GO:0044238,GO:0044260,GO:0044424,GO:0044444,GO:0044464,GO:0046483,GO:0050896,GO:…	xthA	220341.16502889	2.16e-201	557.0	COG0708@1|root,COG0708@2|Bacteria,1MVII@1224|Proteobacteria,1RN4H@1236|Gammaproteobacteria,3ZJ8S@590|Salmonella	1236|Gammaproteobacteria
g349	tfoX	tfoX;	Transcriptional regulator of competence genes TfoX/Sxy family;DNA transformation protein TfoX;TfoX/Sxy family protein;TfoX family protein;Crp/Fnr family transcriptional regulator	hit	K	TfoX N-terminal domain	sxy	GO:0006355,GO:0006810,GO:0007154,GO:0008150,GO:0009290,GO:0009292,GO:0009294,GO:0009605,GO:0009889,GO:0009987,GO:0009991,GO:0010468,GO:0010556,GO:0015931,GO:0019219,GO:0019222,GO:0030420,GO:0031323,GO:0031326,GO:0031344,GO:0031346,GO:0031668,GO:0044087,GO:0044089,GO:0044093,GO:0044764,GO:0048518,GO:0048522,GO:0050657,GO:0050789,GO:0050794,GO:0050896,GO:0051027,GO:0051090,GO:0051091,GO:0051128,GO:…	tfoX	90371.CY43_05485	1.59e-143	404.0	COG3070@1|root,COG3070@2|Bacteria,1RDWD@1224|Proteobacteria,1S496@1236|Gammaproteobacteria,3ZJKH@590|Salmonella	1236|Gammaproteobacteria
g350	stfF	;stfF	hypothetical protein;fimbrial minor subunit StfF	hit	NU	Fimbrial protein	-	-	stfF	90371.CY43_01000	2.74e-89	264.0	COG3539@1|root,COG3539@2|Bacteria,1REAV@1224|Proteobacteria,1RUZ2@1236|Gammaproteobacteria,3ZNCB@590|Salmonella	1236|Gammaproteobacteria
g351	group_3576		Glycoporin;porin	hit	S	Porin-like glycoporin RafY	rafY	-	group_3576	220341.16503898	0.0	911.0	2DBE3@1|root,2Z8QE@2|Bacteria,1N7W6@1224|Proteobacteria,1RNWG@1236|Gammaproteobacteria,3ZN2W@590|Salmonella	1236|Gammaproteobacteria
g352	srlB	;srlB	Glucitol/sorbitol-specific PTS system EIIA component;PTS glucitol/sorbitol transporter subunit IIA	hit	G	PTS system glucitol/sorbitol-specific IIA component	srlB	GO:0003674,GO:0003824,GO:0006793,GO:0006796,GO:0006810,GO:0008150,GO:0008152,GO:0008643,GO:0009401,GO:0009987,GO:0016301,GO:0016310,GO:0016740,GO:0016772,GO:0016773,GO:0044237,GO:0051179,GO:0051234,GO:0071702	srlB	220341.16503911	2.03e-84	248.0	COG3731@1|root,COG3731@2|Bacteria,1RK6V@1224|Proteobacteria,1S6MU@1236|Gammaproteobacteria,3ZMDM@590|Salmonella	1236|Gammaproteobacteria
g353	group_3562		hypothetical protein;Rid family hydrolase;regulator	hit	J	Endoribonuclease L-PSP	-	-	group_3562	220341.16505021	1.29e-83	247.0	COG0251@1|root,COG0251@2|Bacteria,1MZ3J@1224|Proteobacteria,1SYYS@1236|Gammaproteobacteria	1236|Gammaproteobacteria
g354	acpS	acpS	Holo-[acyl-carrier-protein] synthase	hit	I	Transfers the 4'-phosphopantetheine moiety from coenzyme A to a Ser of acyl-carrier-protein	acpS	GO:0003674,GO:0003824,GO:0006082,GO:0006464,GO:0006629,GO:0006631,GO:0006633,GO:0006807,GO:0008150,GO:0008152,GO:0008610,GO:0008897,GO:0009058,GO:0009987,GO:0016053,GO:0016740,GO:0016772,GO:0016780,GO:0018070,GO:0018193,GO:0018209,GO:0018215,GO:0019538,GO:0019752,GO:0032787,GO:0036211,GO:0043170,GO:0043412,GO:0043436,GO:0044237,GO:0044238,GO:0044249,GO:0044255,GO:0044260,GO:0044267,GO:0044281,GO:…	acpS	1197719.A464_2685	3.18e-84	248.0	COG0736@1|root,COG0736@2|Bacteria,1MZBF@1224|Proteobacteria,1S98P@1236|Gammaproteobacteria,3ZM5K@590|Salmonella	1236|Gammaproteobacteria
g355	group_3556	;ulaA	PTS transport protein component II;PTS sugar transporter subunit IIC;hypothetical protein	hit	S	PTS system sugar-specific permease component	-	-	group_3556	90371.CY43_04725	1.93e-312	853.0	COG3037@1|root,COG3037@2|Bacteria,1R3X3@1224|Proteobacteria,1RZCI@1236|Gammaproteobacteria,3ZJ45@590|Salmonella	1236|Gammaproteobacteria
g356	uspA	uspA	universal stress protein UspA	hit	T	Universal stress protein family	uspA	GO:0003674,GO:0005488,GO:0005515,GO:0005575,GO:0005622,GO:0005623,GO:0005737,GO:0042802,GO:0044424,GO:0044464	uspA	1197719.A464_3667	3.95e-98	285.0	COG0589@1|root,COG0589@2|Bacteria,1MV6Y@1224|Proteobacteria,1RQQ7@1236|Gammaproteobacteria,3ZJGY@590|Salmonella	1236|Gammaproteobacteria
g357	rbbA~~~lptB	rbbA;;lptB	ribosome-associated ATPase/putative transporter RbbA;ABC transporter ATP-binding protein;LPS export ABC transporter ATP-binding protein;Putative ABC-type multidrug transport system	hit	V	ABC-2 family transporter protein	rbbA	GO:0003674,GO:0003824,GO:0005488,GO:0005575,GO:0005622,GO:0005623,GO:0005737,GO:0005829,GO:0005840,GO:0005886,GO:0006417,GO:0008150,GO:0009889,GO:0009891,GO:0009893,GO:0010468,GO:0010556,GO:0010557,GO:0010604,GO:0010608,GO:0010628,GO:0015935,GO:0016020,GO:0016462,GO:0016787,GO:0016817,GO:0016818,GO:0016887,GO:0017111,GO:0019222,GO:0022626,GO:0022627,GO:0031323,GO:0031325,GO:0031326,GO:0031328,GO:…	rbbA~~~lptB	90371.CY43_18615	0.0	1756.0	COG0842@1|root,COG1129@1|root,COG0842@2|Bacteria,COG1129@2|Bacteria,1QTT9@1224|Proteobacteria,1T1GD@1236|Gammaproteobacteria,3ZJ15@590|Salmonella	1236|Gammaproteobacteria
g358	stpA	stpA	DNA-binding protein StpA	hit	S	H-NS histone family	stpA	GO:0003674,GO:0003676,GO:0003677,GO:0005488,GO:0005575,GO:0005622,GO:0005623,GO:0005737,GO:0005829,GO:0044424,GO:0044444,GO:0044464,GO:0097159,GO:1901363	stpA	220341.16503882	2.67e-77	232.0	COG2916@1|root,COG2916@2|Bacteria,1RE55@1224|Proteobacteria,1S6P8@1236|Gammaproteobacteria,3ZM7G@590|Salmonella	1236|Gammaproteobacteria
g359	group_3511		Big-13 domain-containing protein	hit	-	-	-	-	group_3511	220341.16505298	1.4e-76	232.0	2BK2N@1|root,32EG0@2|Bacteria,1QQXY@1224|Proteobacteria,1RTNM@1236|Gammaproteobacteria,3ZNF8@590|Salmonella	1236|Gammaproteobacteria
g360	cmoB	;cmoB	hypothetical protein;tRNA (5-methoxyuridine) 34 synthase;tRNA 5-methoxyuridine(34)/uridine 5-oxyacetic acid(34) synthase CmoB	hit	J	Catalyzes carboxymethyl transfer from carboxy-S- adenosyl-L-methionine (Cx-SAM) to 5-hydroxyuridine (ho5U) to form 5-carboxymethoxyuridine (cmo5U) at position 34 in tRNAs	cmoB	GO:0002097,GO:0002098,GO:0003674,GO:0003824,GO:0005488,GO:0005515,GO:0005575,GO:0005622,GO:0005623,GO:0005737,GO:0006139,GO:0006396,GO:0006399,GO:0006400,GO:0006725,GO:0006807,GO:0008033,GO:0008150,GO:0008152,GO:0008168,GO:0008757,GO:0009451,GO:0009987,GO:0010467,GO:0016043,GO:0016070,GO:0016740,GO:0016741,GO:0016765,GO:0022607,GO:0032259,GO:0034470,GO:0034641,GO:0034660,GO:0042802,GO:0043170,GO:…	cmoB	90371.CY43_10055	5.34e-246	674.0	COG0500@1|root,COG0500@2|Bacteria,1MVSK@1224|Proteobacteria,1RMQY@1236|Gammaproteobacteria,3ZIWG@590|Salmonella	1236|Gammaproteobacteria
g361	smg	;smg	Protein Smg-like protein;DUF494 domain-containing protein	hit	S	Protein of unknown function (DUF494)	smg	-	smg	220341.16505185	2.35e-102	297.0	COG2922@1|root,COG2922@2|Bacteria,1RD5F@1224|Proteobacteria,1S43X@1236|Gammaproteobacteria,3ZJ4R@590|Salmonella	1236|Gammaproteobacteria
g362	group_3503		50S ribosomal protein L17	hit	J	Ribosomal protein L17	rplQ	GO:0000027,GO:0003674,GO:0003735,GO:0005198,GO:0005575,GO:0005622,GO:0005623,GO:0005737,GO:0005829,GO:0005840,GO:0006412,GO:0006518,GO:0006807,GO:0006996,GO:0008150,GO:0008152,GO:0009058,GO:0009059,GO:0009987,GO:0010467,GO:0015934,GO:0016043,GO:0019538,GO:0022607,GO:0022613,GO:0022618,GO:0022625,GO:0022626,GO:0032991,GO:0034622,GO:0034641,GO:0034645,GO:0042254,GO:0042255,GO:0042273,GO:0043043,GO:…	group_3503	220341.16505176	3.29e-82	243.0	COG0203@1|root,COG0203@2|Bacteria,1RCWN@1224|Proteobacteria,1S3QK@1236|Gammaproteobacteria,3ZM5R@590|Salmonella	1236|Gammaproteobacteria
g363	panM	panM	aspartate 1-decarboxylase autocleavage activator PanM	hit	K	Controls both the activation and catalytic activity of PanD in a coenzyme A (CoA)-dependent fashion	panZ	GO:0006082,GO:0006508,GO:0006575,GO:0006732,GO:0006766,GO:0006767,GO:0006807,GO:0008150,GO:0008152,GO:0009058,GO:0009108,GO:0009110,GO:0009987,GO:0010467,GO:0015939,GO:0015940,GO:0016053,GO:0016485,GO:0019538,GO:0019752,GO:0031638,GO:0032787,GO:0034641,GO:0042364,GO:0042398,GO:0043086,GO:0043170,GO:0043436,GO:0043603,GO:0043604,GO:0044092,GO:0044237,GO:0044238,GO:0044249,GO:0044271,GO:0044281,GO:…	panM	220341.16505044	2.93e-85	251.0	COG0454@1|root,COG0456@2|Bacteria,1RIN3@1224|Proteobacteria,1S494@1236|Gammaproteobacteria,3ZM9B@590|Salmonella	1236|Gammaproteobacteria
g364	grcA	grcA	autonomous glycyl radical cofactor GrcA	hit	S	Acts as a radical domain for damaged PFL and possibly other radical proteins	grcA	GO:0003674,GO:0003824,GO:0005575,GO:0005622,GO:0005623,GO:0005737,GO:0005829,GO:0006082,GO:0006520,GO:0006566,GO:0006567,GO:0006807,GO:0008150,GO:0008152,GO:0008861,GO:0009056,GO:0009063,GO:0009066,GO:0009068,GO:0009987,GO:0016054,GO:0016407,GO:0016408,GO:0016453,GO:0016740,GO:0016746,GO:0016747,GO:0019752,GO:0043436,GO:0044237,GO:0044238,GO:0044248,GO:0044281,GO:0044282,GO:0044424,GO:0044444,GO:…	grcA	1197719.A464_2704	8.4e-85	250.0	COG3445@1|root,COG3445@2|Bacteria,1RDRB@1224|Proteobacteria,1S45G@1236|Gammaproteobacteria,3ZM95@590|Salmonella	1236|Gammaproteobacteria
g365	secE	secE	preprotein translocase subunit SecE	hit	U	Essential subunit of the Sec protein translocation channel SecYEG. Clamps together the 2 halves of SecY. May contact the channel plug during translocation	secE	GO:0002790,GO:0003674,GO:0005215,GO:0005575,GO:0005623,GO:0005886,GO:0005887,GO:0006605,GO:0006612,GO:0006613,GO:0006614,GO:0006616,GO:0006810,GO:0006886,GO:0008104,GO:0008150,GO:0008320,GO:0008565,GO:0009306,GO:0009987,GO:0015031,GO:0015833,GO:0016020,GO:0016021,GO:0016043,GO:0022857,GO:0022884,GO:0031224,GO:0031226,GO:0031522,GO:0032940,GO:0032978,GO:0032991,GO:0033036,GO:0033365,GO:0034613,GO:…	secE	220341.16504610	1.69e-75	226.0	COG0690@1|root,COG0690@2|Bacteria,1RDI9@1224|Proteobacteria,1S3PA@1236|Gammaproteobacteria,3ZM67@590|Salmonella	1236|Gammaproteobacteria
g366	marA	marA	MDR efflux pump AcrAB transcriptional activator MarA	hit	K	Transcriptional activator of genes involved in the multiple antibiotic resistance (Mar) phenotype	marA	-	marA	220341.16502639	1.13e-88	260.0	COG2207@1|root,COG2207@2|Bacteria,1RAVT@1224|Proteobacteria,1S2T7@1236|Gammaproteobacteria,3ZM6X@590|Salmonella	1236|Gammaproteobacteria
g367	bssR	bssR	biofilm formation regulator BssR	hit	S	Biofilm formation protein (YliH/bssR)	bssR	-	bssR	220341.16502063	1.45e-85	252.0	29WPV@1|root,32QXW@2|Bacteria,1MY77@1224|Proteobacteria,1S8J3@1236|Gammaproteobacteria,3ZM88@590|Salmonella	1236|Gammaproteobacteria
g368	mzrA	mzrA	EnvZ/OmpR regulon moderator MzrA	hit	S	Modulates the activity of the EnvZ OmpR two-component regulatory system, probably by directly modulating EnvZ enzymatic activity and increasing stability of phosphorylated OmpR	mzrA	-	mzrA	220341.16504302	4.16e-85	251.0	2E956@1|root,32NIM@2|Bacteria,1RI63@1224|Proteobacteria,1S6E0@1236|Gammaproteobacteria,3ZM9H@590|Salmonella	1236|Gammaproteobacteria
g369	crcB	crcB	fluoride efflux transporter CrcB	hit	D	Important for reducing fluoride concentration in the cell, thus reducing its toxicity	crcB	GO:0003674,GO:0005215,GO:0005575,GO:0005623,GO:0005886,GO:0005887,GO:0006810,GO:0006811,GO:0006820,GO:0008150,GO:0008509,GO:0015075,GO:0015103,GO:0015318,GO:0015698,GO:0016020,GO:0016021,GO:0022857,GO:0031224,GO:0031226,GO:0034220,GO:0044425,GO:0044459,GO:0044464,GO:0051179,GO:0051234,GO:0055085,GO:0071944,GO:0098656,GO:0098660,GO:0098661,GO:1903424,GO:1903425	crcB	220341.16501882	1.45e-85	252.0	COG0239@1|root,COG0239@2|Bacteria,1MZNH@1224|Proteobacteria,1S9GR@1236|Gammaproteobacteria,3ZM52@590|Salmonella	1236|Gammaproteobacteria
g370	caiE	;caiE	Phenylacetic acid degradation protein PaaY;Carnitine operon protein CaiE;carnitine operon protein CaiE	hit	S	Overproduction of CaiE stimulates the activity of CaiB and CaiD	caiE	GO:0003674,GO:0003824,GO:0006575,GO:0006577,GO:0006807,GO:0008150,GO:0008152,GO:0008735,GO:0009437,GO:0009987,GO:0016829,GO:0016835,GO:0016836,GO:0034641,GO:0044237,GO:0071704,GO:0097164,GO:1901564	caiE	1197719.A464_57	4.89e-132	375.0	COG0663@1|root,COG0663@2|Bacteria,1MVUI@1224|Proteobacteria,1RYPQ@1236|Gammaproteobacteria,3ZJ4M@590|Salmonella	1236|Gammaproteobacteria
g371	fIDO~~~fic	;fIDO;fic	hypothetical protein;putative adenosine monophosphate-protein transferase Fic	hit	D	Fic/DOC family	fic	GO:0008150,GO:0050789,GO:0050794,GO:0051302,GO:0065007	fIDO~~~fic	90371.CY43_18045	6.45e-138	390.0	COG2184@1|root,COG2184@2|Bacteria,1R72A@1224|Proteobacteria,1RYM7@1236|Gammaproteobacteria,3ZIQ2@590|Salmonella	1236|Gammaproteobacteria
g372	mviM~~~yceM	;mviM;yceM	Virulence factor MviM;Gfo/Idh/MocA family oxidoreductase;Virulence factor mviM-like protein;virulence factor MviM;Putative oxidoreductase YceM	hit	S	Oxidoreductase family, NAD-binding Rossmann fold	mviM	-	mviM~~~yceM	220341.16502339	1.96e-224	618.0	COG0673@1|root,COG0673@2|Bacteria,1MVCX@1224|Proteobacteria,1RP1P@1236|Gammaproteobacteria,3ZJJE@590|Salmonella	1236|Gammaproteobacteria
g373	group_3489		hypothetical protein;Putative cytoplasmic protein;DUF2491 domain-containing protein	hit	S	Protein of unknown function (DUF2491)	yjfK	-	group_3489	220341.16505498	4.77e-158	443.0	28M4V@1|root,2ZAIQ@2|Bacteria,1MV1M@1224|Proteobacteria,1RZDJ@1236|Gammaproteobacteria,3ZIRT@590|Salmonella	1236|Gammaproteobacteria
g374	ytfE	ytfE	iron-sulfur cluster repair protein YtfE	hit	D	Di-iron-containing protein involved in the repair of iron-sulfur clusters damaged by oxidative and nitrosative stress conditions	ytfE	GO:0003674,GO:0005488,GO:0005506,GO:0005575,GO:0005622,GO:0005623,GO:0005737,GO:0005829,GO:0006464,GO:0006790,GO:0006807,GO:0008150,GO:0008152,GO:0009987,GO:0016043,GO:0016226,GO:0018282,GO:0018283,GO:0019538,GO:0022607,GO:0030091,GO:0031163,GO:0036211,GO:0043167,GO:0043169,GO:0043170,GO:0043412,GO:0044085,GO:0044237,GO:0044238,GO:0044260,GO:0044267,GO:0044424,GO:0044444,GO:0044464,GO:0046872,GO:…	ytfE	220341.16505526	1.1e-157	442.0	COG2846@1|root,COG2846@2|Bacteria,1MVCQ@1224|Proteobacteria,1RPY6@1236|Gammaproteobacteria,3ZKXB@590|Salmonella	1236|Gammaproteobacteria
g375	dnaX	dnaX;	DNA polymerase III subunit gamma/tau;hypothetical protein	hit	H	DNA polymerase III is a complex, multichain enzyme responsible for most of the replicative synthesis in bacteria. This DNA polymerase also exhibits 3' to 5' exonuclease activity	dnaX	GO:0003674,GO:0003824,GO:0005488,GO:0005515,GO:0005575,GO:0005622,GO:0005623,GO:0006139,GO:0006259,GO:0006260,GO:0006261,GO:0006725,GO:0006807,GO:0008150,GO:0008152,GO:0009058,GO:0009059,GO:0009360,GO:0009987,GO:0016462,GO:0016787,GO:0016817,GO:0016818,GO:0016887,GO:0017111,GO:0030234,GO:0030337,GO:0032991,GO:0034641,GO:0034645,GO:0042575,GO:0042802,GO:0043170,GO:0043846,GO:0044237,GO:0044238,GO:…	dnaX	90371.CY43_02755	0.0	1174.0	COG2812@1|root,COG2812@2|Bacteria,1MVCK@1224|Proteobacteria,1RMIA@1236|Gammaproteobacteria,3ZJB1@590|Salmonella	1236|Gammaproteobacteria
g376	kefB	;kefB	cation:proton antiporter;Potassium transporter KefB;glutathione-regulated potassium-efflux system protein KefB;Glutathione-regulated potassium-efflux system protein (K(+)/H(+)antiporter);Glutathione-regulated potassium-efflux system protein;Putative glutathione-regulated potassium-efflux system protein KefB	hit	P	Pore-forming subunit of a potassium efflux system that confers protection against electrophiles. Catalyzes K( ) H( ) antiport	kefB	GO:0003674,GO:0005215,GO:0005575,GO:0005623,GO:0005886,GO:0005887,GO:0006810,GO:0006811,GO:0006812,GO:0006813,GO:0008150,GO:0008324,GO:0009987,GO:0015075,GO:0015318,GO:0015672,GO:0016020,GO:0016021,GO:0022857,GO:0022890,GO:0030001,GO:0031224,GO:0031226,GO:0034220,GO:0044425,GO:0044459,GO:0044464,GO:0051179,GO:0051234,GO:0055085,GO:0071804,GO:0071805,GO:0071944,GO:0098655,GO:0098660,GO:0098662	kefB	90371.CY43_17980	0.0	1109.0	COG0475@1|root,COG1226@1|root,COG0475@2|Bacteria,COG1226@2|Bacteria,1MV34@1224|Proteobacteria,1RNVR@1236|Gammaproteobacteria,3ZJCP@590|Salmonella	1236|Gammaproteobacteria
g377	group_3488	iclR	transcriptional regulator	hit	K	Transcriptional regulator	-	-	group_3488	90371.CY43_16150	7.13e-158	443.0	COG1414@1|root,COG1414@2|Bacteria,1PGPN@1224|Proteobacteria,1RRGK@1236|Gammaproteobacteria,3ZKIF@590|Salmonella	1236|Gammaproteobacteria
g378	yfcE	;yfcE	Phosphoesterase;phosphodiesterase	hit	S	Calcineurin-like phosphoesterase superfamily domain	yfcE	GO:0003674,GO:0003824,GO:0005488,GO:0005515,GO:0005575,GO:0005622,GO:0005623,GO:0005737,GO:0005829,GO:0008081,GO:0008150,GO:0009987,GO:0016043,GO:0016787,GO:0016788,GO:0022607,GO:0030145,GO:0042578,GO:0042802,GO:0043167,GO:0043169,GO:0043933,GO:0044085,GO:0044424,GO:0044444,GO:0044464,GO:0046872,GO:0046914,GO:0051259,GO:0051260,GO:0051262,GO:0051289,GO:0065003,GO:0071840	yfcE	220341.16503571	2.28e-120	346.0	COG0622@1|root,COG0622@2|Bacteria,1R3Y7@1224|Proteobacteria,1RY3X@1236|Gammaproteobacteria,3ZKD8@590|Salmonella	1236|Gammaproteobacteria
g379	group_3484		fumarylacetoacetate hydrolase family protein;Fumarylacetoacetate (FAA) hydrolase;Uncharacterized protein YcgM	hit	Q	Fumarylacetoacetate (FAA) hydrolase family	ycgM	-	group_3484	220341.16502999	2.15e-159	446.0	COG0179@1|root,COG0179@2|Bacteria,1MVFA@1224|Proteobacteria,1RN6Y@1236|Gammaproteobacteria,3ZJ5X@590|Salmonella	1236|Gammaproteobacteria
g380	tonB	;tonB	Protein TonB;TonB system transport protein TonB	hit	U	Interacts with outer membrane receptor proteins that carry out high-affinity binding and energy dependent uptake into the periplasmic space of specific substrates. It could act to transduce energy from the cytoplasmic membrane to specific energy- requiring processes in the outer membrane, resulting in the release into the periplasm of ligands bound by these outer membrane proteins	tonB	GO:0003674,GO:0005488,GO:0005515,GO:0005575,GO:0005623,GO:0005886,GO:0005887,GO:0006810,GO:0007154,GO:0007165,GO:0008150,GO:0009897,GO:0009986,GO:0009987,GO:0015688,GO:0015833,GO:0015889,GO:0015891,GO:0015893,GO:0016020,GO:0016021,GO:0016032,GO:0019058,GO:0019062,GO:0019904,GO:0022610,GO:0023052,GO:0030288,GO:0030313,GO:0031224,GO:0031226,GO:0031233,GO:0031975,GO:0031992,GO:0032991,GO:0042221,GO:…	tonB	90371.CY43_08875	7.07e-116	338.0	COG0810@1|root,COG0810@2|Bacteria,1MXBE@1224|Proteobacteria,1RMI4@1236|Gammaproteobacteria,3ZKN9@590|Salmonella	1236|Gammaproteobacteria
g381	group_3470		hypothetical protein;Uridine phosphorylase;uridine phosphorylase	hit	F	Phosphorylase superfamily	udp_2	-	group_3470	220341.16504523	2.9e-171	478.0	COG2820@1|root,COG2820@2|Bacteria,1P0EC@1224|Proteobacteria,1RZGR@1236|Gammaproteobacteria,3ZJHF@590|Salmonella	1236|Gammaproteobacteria
g382	group_3469	;araJ	Major facilitator superfamily transporter;Major facilitator superfamily protein;Transporter;putative arabinose efflux permease AraJ MFS family;MFS transporter	hit	U	Major Facilitator Superfamily	yhhS	GO:0005575,GO:0005623,GO:0005886,GO:0016020,GO:0044464,GO:0071944	group_3469	220341.16505029	1.56e-270	743.0	COG0477@1|root,COG0477@2|Bacteria,1QUBP@1224|Proteobacteria,1RUKT@1236|Gammaproteobacteria,3ZIR6@590|Salmonella	1236|Gammaproteobacteria
g383	group_3465	;ccmD	Heme exporter protein C;hypothetical protein;Heme exporter protein D;heme exporter protein CcmD	hit	O	Required for the export of heme to the periplasm for the biogenesis of c-type cytochromes	ccmC	GO:0005575,GO:0005623,GO:0005886,GO:0005887,GO:0006810,GO:0008150,GO:0008152,GO:0015886,GO:0016020,GO:0016021,GO:0031224,GO:0031226,GO:0044425,GO:0044459,GO:0044464,GO:0051179,GO:0051181,GO:0051234,GO:0055114,GO:0071702,GO:0071705,GO:0071944,GO:1901678	group_3465	220341.16504810	5.01e-172	482.0	COG0755@1|root,COG0755@2|Bacteria,1MU61@1224|Proteobacteria,1RP3R@1236|Gammaproteobacteria,3ZJ8D@590|Salmonella	1236|Gammaproteobacteria
g384	ccmE	;ccmE	Cytochrome c-type biogenesis protein CcmE;cytochrome c maturation protein CcmE	hit	O	Heme chaperone required for the biogenesis of c-type cytochromes. Transiently binds heme delivered by CcmC and transfers the heme to apo-cytochromes in a process facilitated by CcmF and CcmH	ccmE	GO:0003674,GO:0003824,GO:0005488,GO:0005575,GO:0005623,GO:0005886,GO:0006464,GO:0006807,GO:0006810,GO:0008150,GO:0008152,GO:0009897,GO:0009986,GO:0009987,GO:0015886,GO:0016020,GO:0016043,GO:0017003,GO:0017004,GO:0017006,GO:0018063,GO:0019538,GO:0020037,GO:0022607,GO:0031224,GO:0031226,GO:0031233,GO:0031237,GO:0034622,GO:0036211,GO:0043170,GO:0043412,GO:0043933,GO:0044085,GO:0044237,GO:0044238,GO:…	ccmE	220341.16503477	9.62e-99	289.0	COG2332@1|root,COG2332@2|Bacteria,1RHN5@1224|Proteobacteria,1S5VA@1236|Gammaproteobacteria,3ZJHM@590|Salmonella	1236|Gammaproteobacteria
g385	group_3464	;dsbG	Thiol:disulfide interchange protein DsbG;thiol:disulfide interchange protein DsbG	hit	O	Required for disulfide bond formation in some periplasmic proteins. Acts by transferring its disulfide bond to other proteins and is reduced in the process	dsbG	GO:0003674,GO:0003756,GO:0003824,GO:0005575,GO:0005623,GO:0008150,GO:0008152,GO:0015035,GO:0015036,GO:0016491,GO:0016667,GO:0016853,GO:0016860,GO:0016864,GO:0042597,GO:0044464,GO:0055114,GO:0140096	group_3464	90371.CY43_03320	1.5e-178	497.0	COG1651@1|root,COG1651@2|Bacteria,1NEFD@1224|Proteobacteria,1RQAW@1236|Gammaproteobacteria,3ZK8N@590|Salmonella	1236|Gammaproteobacteria
g386	ssuE	;ssuE	NADPH-dependent FMN reductase;Putative oxidoreductase;Quinone reductase;NAD(P)H-dependent FMN reductase	hit	S	NADPH-dependent FMN reductase	yieF	GO:0000166,GO:0003674,GO:0003824,GO:0005488,GO:0005575,GO:0005622,GO:0005623,GO:0005737,GO:0005829,GO:0006805,GO:0008150,GO:0008152,GO:0009410,GO:0009987,GO:0010181,GO:0016491,GO:0016645,GO:0016646,GO:0032553,GO:0036094,GO:0042221,GO:0043167,GO:0043168,GO:0044237,GO:0044424,GO:0044444,GO:0044464,GO:0048037,GO:0050662,GO:0050896,GO:0051716,GO:0052873,GO:0055114,GO:0070887,GO:0071466,GO:0097159,GO:…	ssuE	220341.16504784	2.26e-135	383.0	COG0431@1|root,COG0431@2|Bacteria,1RAFI@1224|Proteobacteria,1RYNR@1236|Gammaproteobacteria,3ZJSC@590|Salmonella	1236|Gammaproteobacteria
g387	thiG	thiG	thiazole synthase	hit	H	Catalyzes the rearrangement of 1-deoxy-D-xylulose 5- phosphate (DXP) to produce the thiazole phosphate moiety of thiamine. Sulfur is provided by the thiocarboxylate moiety of the carrier protein ThiS. In vitro, sulfur can be provided by H(2)S	thiG	GO:0003674,GO:0003824,GO:0005575,GO:0005622,GO:0005623,GO:0005737,GO:0005829,GO:0006725,GO:0006766,GO:0006767,GO:0006772,GO:0006790,GO:0006807,GO:0008150,GO:0008152,GO:0009058,GO:0009110,GO:0009228,GO:0009987,GO:0017144,GO:0018130,GO:0019438,GO:0034641,GO:0042364,GO:0042723,GO:0042724,GO:0044237,GO:0044249,GO:0044271,GO:0044272,GO:0044281,GO:0044283,GO:0044424,GO:0044444,GO:0044464,GO:0046483,GO:…	thiG	220341.16504601	1.7e-163	459.0	COG2022@1|root,COG2022@2|Bacteria,1N0N5@1224|Proteobacteria,1RMPD@1236|Gammaproteobacteria,3ZKTA@590|Salmonella	1236|Gammaproteobacteria
g388	group_3457	rhaT	EamA family transporter	hit	EG	EamA-like transporter family	-	-	group_3457	90371.CY43_22905	1.59e-213	590.0	COG0697@1|root,COG0697@2|Bacteria,1MW5X@1224|Proteobacteria,1RN97@1236|Gammaproteobacteria,3ZJZC@590|Salmonella	1236|Gammaproteobacteria
g389	iscU	iscU	Fe-S cluster assembly scaffold IscU	hit	C	A scaffold on which IscS assembles Fe-S clusters. It is likely that Fe-S cluster coordination is flexible as the role of this complex is to build and then hand off Fe-S clusters	iscU	GO:0003674,GO:0003824,GO:0005488,GO:0005506,GO:0005515,GO:0005575,GO:0005622,GO:0005623,GO:0005737,GO:0005829,GO:0006790,GO:0006807,GO:0006873,GO:0006875,GO:0006879,GO:0008150,GO:0008152,GO:0008198,GO:0009987,GO:0010467,GO:0016043,GO:0016226,GO:0016740,GO:0016782,GO:0019538,GO:0019725,GO:0022607,GO:0030003,GO:0031163,GO:0036455,GO:0042592,GO:0042802,GO:0043167,GO:0043169,GO:0043170,GO:0044085,GO:…	iscU	1197719.A464_2654	1.34e-86	254.0	COG0822@1|root,COG0822@2|Bacteria,1RD5K@1224|Proteobacteria,1S3P1@1236|Gammaproteobacteria,3ZM87@590|Salmonella	1236|Gammaproteobacteria
g390	tusD	tusD	sulfurtransferase complex subunit TusD	hit	J	Part of a sulfur-relay system required for 2-thiolation of 5-methylaminomethyl-2-thiouridine (mnm(5)s(2)U) at tRNA wobble positions. Accepts sulfur from TusA and transfers it in turn to TusE	tusD	GO:0002097,GO:0002098,GO:0002143,GO:0003674,GO:0005575,GO:0005622,GO:0005623,GO:0005737,GO:0005829,GO:0006139,GO:0006396,GO:0006399,GO:0006400,GO:0006725,GO:0006790,GO:0006807,GO:0008033,GO:0008150,GO:0008152,GO:0009451,GO:0009987,GO:0010467,GO:0016070,GO:0019417,GO:0032991,GO:0034227,GO:0034470,GO:0034641,GO:0034660,GO:0043170,GO:0043412,GO:0044237,GO:0044238,GO:0044424,GO:0044444,GO:0044445,GO:…	tusD	90371.CY43_17950	4.66e-87	256.0	COG1553@1|root,COG1553@2|Bacteria,1N021@1224|Proteobacteria,1S99J@1236|Gammaproteobacteria,3ZM7H@590|Salmonella	1236|Gammaproteobacteria
g391	dkgB	;dkgB	aldo/keto reductase;25-diketo-D-gluconate reductase B;25-didehydrogluconate reductase DkgB	hit	H	Catalyzes the reduction of 2,5-diketo-D-gluconic acid	dkgB	GO:0003674,GO:0003824,GO:0004033,GO:0006081,GO:0008150,GO:0008152,GO:0009056,GO:0009438,GO:0009987,GO:0016491,GO:0016614,GO:0016616,GO:0042180,GO:0042182,GO:0044237,GO:0044248,GO:0044281,GO:0044282,GO:0046185,GO:0047681,GO:0051596,GO:0055114,GO:0071704,GO:1901575,GO:1990002	dkgB	90371.CY43_01280	3.98e-188	523.0	COG0656@1|root,COG0656@2|Bacteria,1MWFS@1224|Proteobacteria,1RMX6@1236|Gammaproteobacteria,3ZMRP@590|Salmonella	1236|Gammaproteobacteria
g392	ybgS	ybgS	Uncharacterized protein YbgS	hit	S	YbgS-like protein	ybgS	-	ybgS	1197719.A464_726	1.02e-42	144.0	2AAK7@1|root,30ZXQ@2|Bacteria,1REV6@1224|Proteobacteria,1S3VK@1236|Gammaproteobacteria,3ZM68@590|Salmonella	1236|Gammaproteobacteria
g393	group_3453		YacC family pilotin-like protein	hit	S	Type II secretion system pilotin lipoprotein (PulS_OutS)	yacC	-	group_3453	1080067.BAZH01000004_gene4169	3.54e-82	243.0	2B1X9@1|root,31UDJ@2|Bacteria,1RH3T@1224|Proteobacteria,1S639@1236|Gammaproteobacteria,3WYFI@544|Citrobacter	1236|Gammaproteobacteria
g394	cybC	cybC	cytochrome b562	hit	C	Cytochrome b562	cybC	-	cybC	220341.16505547	2.4e-80	239.0	COG3783@1|root,COG3783@2|Bacteria,1N1DX@1224|Proteobacteria,1SAB6@1236|Gammaproteobacteria,3ZM8Q@590|Salmonella	1236|Gammaproteobacteria
g395	hxlR	hxlR	transcriptional regulator	hit	K	HxlR-like helix-turn-helix	ytfH	-	hxlR	220341.16505529	4.66e-87	256.0	COG1733@1|root,COG1733@2|Bacteria,1MZ6N@1224|Proteobacteria,1S5WB@1236|Gammaproteobacteria,3ZM9J@590|Salmonella	1236|Gammaproteobacteria
g396	glnK	glnK	P-II family nitrogen regulator	hit	K	Nitrogen regulatory protein P-II	glnK	GO:0003674,GO:0005488,GO:0005515,GO:0006808,GO:0008150,GO:0042802,GO:0045848,GO:0048518,GO:0050789,GO:0065007	glnK	220341.16501734	1.01e-64	198.0	COG0347@1|root,COG0347@2|Bacteria,1RGWK@1224|Proteobacteria,1S67I@1236|Gammaproteobacteria,3ZM9Z@590|Salmonella	1236|Gammaproteobacteria
g397	spy	;spy	hypothetical protein;ATP-independent periplasmic protein-refolding chaperone Spy	hit	NPTU	Heavy-metal resistance	spy	GO:0003674,GO:0005488,GO:0005515,GO:0005575,GO:0005623,GO:0006457,GO:0008150,GO:0009987,GO:0010033,GO:0014070,GO:0030288,GO:0030313,GO:0031975,GO:0042221,GO:0042597,GO:0044464,GO:0050896,GO:0051082,GO:0061077,GO:1990507	spy	90371.CY43_06660	3.1e-101	294.0	COG3678@1|root,COG3678@2|Bacteria,1RBDH@1224|Proteobacteria,1S2DT@1236|Gammaproteobacteria,3ZK0Z@590|Salmonella	1236|Gammaproteobacteria
g398	eutA	;eutA	ethanolamine ammonia-lyase reactivating factor EutA	hit	E	Ethanolamine utilisation protein EutA	eutA	GO:0006807,GO:0008150,GO:0008152,GO:0009987,GO:0019538,GO:0030091,GO:0043085,GO:0043170,GO:0044093,GO:0044237,GO:0044238,GO:0044260,GO:0044267,GO:0050790,GO:0051339,GO:0051349,GO:0065007,GO:0065009,GO:0071704,GO:1901564	eutA	90371.CY43_13150	0.0	882.0	COG4819@1|root,COG4819@2|Bacteria,1PPGT@1224|Proteobacteria,1RYIP@1236|Gammaproteobacteria,3ZMUB@590|Salmonella	1236|Gammaproteobacteria
g399	argT	;argT	transporter substrate-binding domain-containing protein;hypothetical protein;Lysine-arginine-ornithine-binding periplasmic protein;Lysine/arginine/ornithine-binding periplasmic protein;lysine/arginine/ornithine ABC transporter substrate-binding protein ArgT	hit	ET	Bacterial periplasmic substrate-binding proteins	argT	GO:0005575,GO:0005623,GO:0006810,GO:0006811,GO:0006812,GO:0006820,GO:0006865,GO:0006950,GO:0006995,GO:0007154,GO:0008150,GO:0009267,GO:0009605,GO:0009987,GO:0009991,GO:0010035,GO:0010038,GO:0010043,GO:0015711,GO:0015807,GO:0015822,GO:0015849,GO:0015893,GO:0030288,GO:0030313,GO:0031667,GO:0031668,GO:0031669,GO:0031975,GO:0033554,GO:0042221,GO:0042493,GO:0042594,GO:0042597,GO:0043562,GO:0044464,GO:…	argT	90371.CY43_12605	1.04e-173	486.0	COG0834@1|root,COG0834@2|Bacteria,1NT2J@1224|Proteobacteria,1RRYR@1236|Gammaproteobacteria,3ZJNM@590|Salmonella	1236|Gammaproteobacteria
g400	group_3427	;rpnC	Transposase-31 domain-containing protein;hypothetical protein;Rpn family recombination-promoting nuclease/putative transposase;transposase	hit	S	Putative transposase, YhgA-like	-	-	group_3427	220341.16501751	1.99e-196	548.0	COG5464@1|root,COG5464@2|Bacteria,1MUSP@1224|Proteobacteria,1RZGQ@1236|Gammaproteobacteria,3ZJEB@590|Salmonella	1236|Gammaproteobacteria
g401	glk	;glk	Glucokinase;hypothetical protein;glucokinase	hit	F	Glucokinase	glk	GO:0003674,GO:0003824,GO:0004340,GO:0004396,GO:0005575,GO:0005622,GO:0005623,GO:0005737,GO:0005829,GO:0005975,GO:0006082,GO:0006090,GO:0006091,GO:0006096,GO:0006139,GO:0006163,GO:0006164,GO:0006165,GO:0006725,GO:0006732,GO:0006733,GO:0006753,GO:0006754,GO:0006757,GO:0006793,GO:0006796,GO:0006807,GO:0008150,GO:0008152,GO:0009056,GO:0009058,GO:0009108,GO:0009117,GO:0009123,GO:0009124,GO:0009126,GO:…	glk	90371.CY43_12860	5.5e-238	653.0	COG0837@1|root,COG0837@2|Bacteria,1MVFI@1224|Proteobacteria,1RNUY@1236|Gammaproteobacteria,3ZJZ0@590|Salmonella	1236|Gammaproteobacteria
g402	pbp4b	;pbp4b	Esterase;Penicillin binding protein PBP4B;penicillin binding protein PBP4B;Periplasmic esterase;hypothetical protein	hit	V	Beta-lactamase	yfeW	GO:0003674,GO:0003824,GO:0004180,GO:0004185,GO:0005488,GO:0005575,GO:0005623,GO:0005886,GO:0006508,GO:0006807,GO:0008144,GO:0008150,GO:0008152,GO:0008233,GO:0008236,GO:0008238,GO:0008658,GO:0009002,GO:0016020,GO:0016787,GO:0017171,GO:0019538,GO:0031224,GO:0031226,GO:0031406,GO:0033218,GO:0033293,GO:0036094,GO:0043167,GO:0043168,GO:0043170,GO:0043177,GO:0044238,GO:0044425,GO:0044459,GO:0044464,GO:…	pbp4b	220341.16503694	0.0	889.0	COG1680@1|root,COG1680@2|Bacteria,1QVWF@1224|Proteobacteria,1T2KR@1236|Gammaproteobacteria,3ZKPT@590|Salmonella	1236|Gammaproteobacteria
g403	dusA	dusA	tRNA dihydrouridine(20/20a) synthase DusA	hit	J	Catalyzes the synthesis of 5,6-dihydrouridine (D), a modified base found in the D-loop of most tRNAs, via the reduction of the C5-C6 double bond in target uridines. Specifically modifies U20 and U20a in tRNAs	dusA	GO:0002943,GO:0003674,GO:0003824,GO:0005575,GO:0005622,GO:0005623,GO:0005737,GO:0005829,GO:0006139,GO:0006396,GO:0006399,GO:0006400,GO:0006725,GO:0006807,GO:0008033,GO:0008150,GO:0008152,GO:0009451,GO:0009987,GO:0010467,GO:0016070,GO:0016491,GO:0016627,GO:0017150,GO:0034470,GO:0034641,GO:0034660,GO:0043170,GO:0043412,GO:0044237,GO:0044238,GO:0044424,GO:0044444,GO:0044464,GO:0046483,GO:0055114,GO:…	dusA	90371.CY43_22155	1.48e-235	649.0	COG0042@1|root,COG0042@2|Bacteria,1MUY1@1224|Proteobacteria,1RN28@1236|Gammaproteobacteria,3ZKEP@590|Salmonella	1236|Gammaproteobacteria
g404	mig14	;mig-14	hypothetical protein;Mig-14 protein;Antimicrobial resistance protein Mig-14;antimicrobial peptide resistance protein Mig-14	hit	M	Mig-14	epsB	-	mig14	220341.16503865	3.96e-224	616.0	COG5653@1|root,COG5653@2|Bacteria,1RFW0@1224|Proteobacteria,1S3PF@1236|Gammaproteobacteria,3ZN4S@590|Salmonella	1236|Gammaproteobacteria
g405	group_3413	purR	HTH-type transcriptional repressor PurR	hit	K	Is the main repressor of the genes involved in the de novo synthesis of purine nucleotides, regulating purB, purC, purEK, purF, purHD, purL, purMN and guaBA expression. PurR is allosterically activated to bind its cognate DNA by binding the purine corepressors, hypoxanthine or guanine, thereby effecting transcription repression	purR	GO:0001130,GO:0001131,GO:0001141,GO:0001217,GO:0002054,GO:0002057,GO:0002060,GO:0003674,GO:0003700,GO:0005488,GO:0005575,GO:0005622,GO:0005623,GO:0005737,GO:0005829,GO:0006140,GO:0006355,GO:0008150,GO:0009889,GO:0009890,GO:0009892,GO:0010468,GO:0010556,GO:0010558,GO:0010563,GO:0010605,GO:0010629,GO:0019219,GO:0019220,GO:0019222,GO:0030808,GO:0030809,GO:0031323,GO:0031324,GO:0031326,GO:0031327,GO:…	group_3413	90371.CY43_07275	5.58e-248	680.0	COG1609@1|root,COG1609@2|Bacteria,1MVUR@1224|Proteobacteria,1RN2K@1236|Gammaproteobacteria,3ZKKP@590|Salmonella	1236|Gammaproteobacteria
g406	nikR	;nikR	hypothetical protein;nickel-responsive transcriptional regulator NikR	hit	K	Transcriptional repressor of the nikABCDE operon. Is active in the presence of excessive concentrations of intracellular nickel	nikR	GO:0000976,GO:0000984,GO:0000985,GO:0001017,GO:0001046,GO:0001047,GO:0001067,GO:0001130,GO:0001217,GO:0003674,GO:0003676,GO:0003677,GO:0003690,GO:0003700,GO:0005488,GO:0005515,GO:0005575,GO:0006355,GO:0008150,GO:0009889,GO:0009890,GO:0009892,GO:0009987,GO:0010468,GO:0010556,GO:0010558,GO:0010605,GO:0010629,GO:0016043,GO:0016151,GO:0019219,GO:0019222,GO:0022607,GO:0031323,GO:0031324,GO:0031326,GO:…	nikR	220341.16505026	1.77e-92	270.0	COG0864@1|root,COG0864@2|Bacteria,1RK4R@1224|Proteobacteria,1S44Q@1236|Gammaproteobacteria,3ZM59@590|Salmonella	1236|Gammaproteobacteria
g407	group_3411		Cytochrome b561-like protein;cytochrome B	hit	C	Prokaryotic cytochrome b561	yceJ	GO:0005575,GO:0005623,GO:0005886,GO:0016020,GO:0044464,GO:0071944	group_3411	90371.CY43_05905	5.63e-131	372.0	COG3038@1|root,COG3038@2|Bacteria,1MZ7X@1224|Proteobacteria,1S3RF@1236|Gammaproteobacteria,3ZKCU@590|Salmonella	1236|Gammaproteobacteria
g408	purK	;purK	hypothetical protein;5-(carboxyamino)imidazole ribonucleotide synthase;Phosphoribosylaminoimidazole carboxylase ATPase subunit	hit	F	Catalyzes the ATP-dependent conversion of 5- aminoimidazole ribonucleotide (AIR) and HCO(3)(-) to N5- carboxyaminoimidazole ribonucleotide (N5-CAIR)	purK	GO:0000166,GO:0003674,GO:0003824,GO:0004638,GO:0005488,GO:0005524,GO:0005575,GO:0005622,GO:0005623,GO:0005737,GO:0005829,GO:0006139,GO:0006163,GO:0006164,GO:0006725,GO:0006753,GO:0006793,GO:0006796,GO:0006807,GO:0008144,GO:0008150,GO:0008152,GO:0009058,GO:0009117,GO:0009150,GO:0009152,GO:0009165,GO:0009259,GO:0009260,GO:0009987,GO:0016829,GO:0016830,GO:0016831,GO:0016874,GO:0016879,GO:0017076,GO:…	purK	220341.16501800	3.38e-245	675.0	COG0026@1|root,COG0026@2|Bacteria,1MU70@1224|Proteobacteria,1RQEI@1236|Gammaproteobacteria,3ZJ36@590|Salmonella	1236|Gammaproteobacteria
g409	ycaO	;ycaO	YcaO-like family protein;30S ribosomal protein S12 methylthiotransferase accessory factor YcaO	hit	S	YcaO cyclodehydratase, ATP-ad Mg2+-binding	ycaO	GO:0000287,GO:0003674,GO:0003824,GO:0005488,GO:0005575,GO:0005622,GO:0005623,GO:0005737,GO:0005829,GO:0006464,GO:0006807,GO:0008150,GO:0008152,GO:0009987,GO:0016462,GO:0016787,GO:0016817,GO:0016818,GO:0018193,GO:0018197,GO:0018198,GO:0018339,GO:0019538,GO:0036211,GO:0043167,GO:0043169,GO:0043170,GO:0043412,GO:0044237,GO:0044238,GO:0044260,GO:0044267,GO:0044424,GO:0044444,GO:0044464,GO:0046872,GO:…	ycaO	220341.16502138	0.0	1192.0	COG1944@1|root,COG1944@2|Bacteria,1MV7K@1224|Proteobacteria,1RN47@1236|Gammaproteobacteria,3ZJDB@590|Salmonella	1236|Gammaproteobacteria
g410	phnT	phnT	2-aminoethylphosphonate ABC transport system ATP-binding subunit PhnT	hit	E	AAA ATPase domain	phnT	-	phnT	220341.16501696	1.08e-266	730.0	COG3842@1|root,COG3842@2|Bacteria,1MU3I@1224|Proteobacteria,1RNPX@1236|Gammaproteobacteria,3ZN22@590|Salmonella	1236|Gammaproteobacteria
g411	pdeR	;pdeR	RNase II stability modulator;cyclic di-GMP phosphodiesterase	hit	T	PAS domain	gmr	GO:0000166,GO:0001882,GO:0001883,GO:0003674,GO:0003824,GO:0005488,GO:0005525,GO:0008081,GO:0008150,GO:0010468,GO:0010608,GO:0016787,GO:0016788,GO:0017076,GO:0019001,GO:0019222,GO:0031279,GO:0031280,GO:0032549,GO:0032550,GO:0032553,GO:0032555,GO:0032561,GO:0035639,GO:0036094,GO:0042578,GO:0043086,GO:0043167,GO:0043168,GO:0044092,GO:0050789,GO:0050790,GO:0060255,GO:0065007,GO:0065009,GO:0071111,GO:…	pdeR	90371.CY43_08695	0.0	1293.0	COG5001@1|root,COG5001@2|Bacteria,1MU2C@1224|Proteobacteria,1RM8A@1236|Gammaproteobacteria,3ZJNY@590|Salmonella	1236|Gammaproteobacteria
g412	group_3407		RNA ligase RtcB family protein	hit	S	tRNA-splicing ligase RtcB	rtcB	-	group_3407	220341.16501600	5.02e-277	757.0	COG1690@1|root,COG1690@2|Bacteria,1MUHA@1224|Proteobacteria,1RN50@1236|Gammaproteobacteria,3ZMRJ@590|Salmonella	1236|Gammaproteobacteria
g413	cheY	cheY	chemotaxis regulatory protein CheY	hit	KT	Response regulator receiver domain	cheY	GO:0000287,GO:0001539,GO:0003674,GO:0003824,GO:0005488,GO:0005575,GO:0005622,GO:0005623,GO:0005737,GO:0005829,GO:0006464,GO:0006468,GO:0006473,GO:0006475,GO:0006793,GO:0006796,GO:0006807,GO:0006928,GO:0006935,GO:0007154,GO:0007165,GO:0008150,GO:0008152,GO:0009605,GO:0009987,GO:0016310,GO:0016407,GO:0016740,GO:0016746,GO:0016747,GO:0018193,GO:0018205,GO:0018393,GO:0018394,GO:0019538,GO:0023014,GO:…	cheY	1197719.A464_2067	1.97e-84	249.0	COG0745@1|root,COG0745@2|Bacteria,1RDNP@1224|Proteobacteria,1S47I@1236|Gammaproteobacteria,3ZM5Z@590|Salmonella	1236|Gammaproteobacteria
g414	group_3405	gloA	VOC family protein	hit	E	Glyoxalase-like domain	yaeR	-	group_3405	90371.CY43_01180	2.9e-95	276.0	COG0346@1|root,COG0346@2|Bacteria,1RGZ8@1224|Proteobacteria,1S66M@1236|Gammaproteobacteria,3ZM93@590|Salmonella	1236|Gammaproteobacteria
g415	gcvH	gcvH	glycine cleavage system protein GcvH	hit	E	The glycine cleavage system catalyzes the degradation of glycine. The H protein shuttles the methylamine group of glycine from the P protein to the T protein	gcvH	GO:0001505,GO:0003674,GO:0005488,GO:0005504,GO:0005575,GO:0005622,GO:0005623,GO:0005737,GO:0005829,GO:0006082,GO:0006520,GO:0006544,GO:0006546,GO:0006807,GO:0008150,GO:0008152,GO:0008289,GO:0009056,GO:0009063,GO:0009069,GO:0009071,GO:0009987,GO:0016054,GO:0017144,GO:0019464,GO:0019752,GO:0031405,GO:0031406,GO:0033293,GO:0036094,GO:0042133,GO:0042135,GO:0042737,GO:0043167,GO:0043168,GO:0043177,GO:…	gcvH	155864.EDL933_4106	1.97e-84	249.0	COG0509@1|root,COG0509@2|Bacteria,1RGV7@1224|Proteobacteria,1S656@1236|Gammaproteobacteria,3XPN3@561|Escherichia	1236|Gammaproteobacteria
g416	ymdB	;ymdB	Macro domain-containing protein;O-acetyl-ADP-ribose deacetylase	hit	S	Deacetylates O-acetyl-ADP ribose. Down-regulates ribonuclease 3 (RNase III) activity. Acts by interacting directly with the region of the ribonuclease that is required for dimerization activation	ymdB	GO:0003674,GO:0003824,GO:0004857,GO:0005488,GO:0005515,GO:0008150,GO:0008428,GO:0009892,GO:0010605,GO:0016787,GO:0019213,GO:0019219,GO:0019222,GO:0019899,GO:0030234,GO:0031323,GO:0031324,GO:0032069,GO:0032074,GO:0043086,GO:0043900,GO:0044092,GO:0045934,GO:0048519,GO:0048523,GO:0050789,GO:0050790,GO:0050794,GO:0051171,GO:0051172,GO:0051252,GO:0051253,GO:0051336,GO:0051346,GO:0060255,GO:0060698,GO:…	ymdB	220341.16502318	5.1e-124	353.0	COG2110@1|root,COG2110@2|Bacteria,1RCWP@1224|Proteobacteria,1S3WJ@1236|Gammaproteobacteria,3ZKG9@590|Salmonella	1236|Gammaproteobacteria
g417	sirB2	sirB2	invasion regulator SirB2	hit	S	Invasion gene expression up-regulator, SirB	sirB2	GO:0005575,GO:0005623,GO:0005886,GO:0016020,GO:0044464,GO:0071944	sirB2	220341.16502963	1.56e-81	242.0	COG3094@1|root,COG3094@2|Bacteria,1MZN6@1224|Proteobacteria,1S5WP@1236|Gammaproteobacteria,3ZM55@590|Salmonella	1236|Gammaproteobacteria
g418	adhE~~~eutE	adhE;eutE	aldehyde dehydrogenase EutE;Acetaldehyde dehydrogenase (acetylating) EutE	hit	C	Aldehyde dehydrogenase family	eutE	GO:0003674,GO:0003824,GO:0004029,GO:0008150,GO:0008152,GO:0016491,GO:0016620,GO:0016903,GO:0055114	adhE~~~eutE	90371.CY43_13170	0.0	889.0	COG1012@1|root,COG1012@2|Bacteria,1QUBI@1224|Proteobacteria,1RP7H@1236|Gammaproteobacteria,3ZMX5@590|Salmonella	1236|Gammaproteobacteria
g419	rna	;rna	Ribonuclease I;ribonuclease I	hit	J	Ribonuclease T2 family	rna	GO:0005575,GO:0005622,GO:0005623,GO:0005737,GO:0006139,GO:0006401,GO:0006725,GO:0006807,GO:0008150,GO:0008152,GO:0009056,GO:0009057,GO:0009987,GO:0016070,GO:0019439,GO:0030288,GO:0030313,GO:0031975,GO:0034641,GO:0034655,GO:0042597,GO:0043170,GO:0044237,GO:0044238,GO:0044248,GO:0044260,GO:0044265,GO:0044270,GO:0044424,GO:0044464,GO:0046483,GO:0046700,GO:0071704,GO:0090304,GO:1901360,GO:1901361,GO:…	rna	90371.CY43_03370	1.35e-200	554.0	COG3719@1|root,COG3719@2|Bacteria,1NRPM@1224|Proteobacteria,1RND8@1236|Gammaproteobacteria,3ZJDM@590|Salmonella	1236|Gammaproteobacteria
g420	group_3393	;sucD	Bacterial FdrA protein;acyl-CoA synthetase FdrA;FdrA protein;Protein FdrA;Membrane protein FdrA	hit	C	CoA-ligase	fdrA	GO:0001539,GO:0005575,GO:0005622,GO:0005623,GO:0005737,GO:0006928,GO:0008150,GO:0009361,GO:0009987,GO:0032991,GO:0040011,GO:0042709,GO:0044424,GO:0044444,GO:0044464,GO:0045239,GO:0048870,GO:0051179,GO:0051674,GO:0071973,GO:0097588,GO:1902494	group_3393	220341.16501796	0.0	1045.0	COG0074@1|root,COG0074@2|Bacteria,1MWWN@1224|Proteobacteria,1RME7@1236|Gammaproteobacteria,3ZJE7@590|Salmonella	1236|Gammaproteobacteria
g421	group_3391	;rocR	PrpR-N domain-containing protein;sigma-54-dependent transcriptional regulator	hit	KT	Propionate catabolism activator	-	-	group_3391	90371.CY43_03550	0.0	1249.0	COG3829@1|root,COG3829@2|Bacteria,1NU8B@1224|Proteobacteria,1RMHY@1236|Gammaproteobacteria,3ZMWC@590|Salmonella	1236|Gammaproteobacteria
g422	dctQ	dctQ	Tripartite ATP-independent periplasmic transporter DctM component	hit	G	Tripartite ATP-independent periplasmic transporter, DctM component	-	-	dctQ	220341.16504685	1.67e-276	760.0	COG1593@1|root,COG1593@2|Bacteria,1MU0F@1224|Proteobacteria,1RNAM@1236|Gammaproteobacteria,3ZJBJ@590|Salmonella	1236|Gammaproteobacteria
g423	group_3382	;fadH	N-ethylmaleimide reductase;alkene reductase	hit	C	NADH:flavin oxidoreductase / NADH oxidase family	nemA	GO:0000166,GO:0003674,GO:0003824,GO:0005488,GO:0005575,GO:0005622,GO:0005623,GO:0005737,GO:0005829,GO:0006725,GO:0006805,GO:0006807,GO:0008150,GO:0008152,GO:0008748,GO:0009056,GO:0009410,GO:0009987,GO:0010181,GO:0016491,GO:0016627,GO:0016628,GO:0016661,GO:0017144,GO:0018937,GO:0018973,GO:0018974,GO:0019326,GO:0019439,GO:0032553,GO:0034567,GO:0036094,GO:0042221,GO:0042537,GO:0043167,GO:0043168,GO:…	group_3382	220341.16502773	7.3e-266	728.0	COG1902@1|root,COG1902@2|Bacteria,1MVIX@1224|Proteobacteria,1RMFI@1236|Gammaproteobacteria,3ZJ51@590|Salmonella	1236|Gammaproteobacteria
g424	group_3380	yicI;	Alpha-glucosidase/xylosidase GH31 family;alpha-xylosidase;Glycosyl hydrolase;Alpha-xylosidase	hit	G	Galactose mutarotase-like	yicI	GO:0003674,GO:0003824,GO:0004553,GO:0005488,GO:0005515,GO:0016787,GO:0016798,GO:0042802,GO:0080176	group_3380	220341.16504867	0.0	1637.0	COG1501@1|root,COG1501@2|Bacteria,1MWNJ@1224|Proteobacteria,1RMJ9@1236|Gammaproteobacteria,3ZITF@590|Salmonella	1236|Gammaproteobacteria
g425	potE~~~ycaM	;potE;ycaM	hypothetical protein;inner membrane transporter ycaM domain protein;APC family permease;Serine transporter YbeC amino acid:H+ symporter family;amino acid permease;Inner membrane transporter YcaM	hit	E	Amino acid permease	ycaM	GO:0005575,GO:0005623,GO:0005886,GO:0016020,GO:0044464,GO:0071944	potE~~~ycaM	220341.16502133	0.0	926.0	COG0531@1|root,COG0531@2|Bacteria,1MVTW@1224|Proteobacteria,1S0DS@1236|Gammaproteobacteria,3ZJ81@590|Salmonella	1236|Gammaproteobacteria
g426	group_3379		DJ-1/PfpI family protein	hit	S	DJ-1/PfpI family	yajL_1	-	group_3379	90371.CY43_10175	6.57e-99	288.0	COG0693@1|root,COG0693@2|Bacteria,1P4JD@1224|Proteobacteria,1RZ4J@1236|Gammaproteobacteria,3ZKJ8@590|Salmonella	1236|Gammaproteobacteria
g427	corB~~~yfjD	corB;yfjD	Mg2+ and Co2+ transporter CorB contains DUF21 CBS pair and CorC-HlyC domains;UPF0053 inner membrane protein YfjD	hit	P	Domain of unknown function DUF21	yfjD	GO:0005575,GO:0005623,GO:0005886,GO:0016020,GO:0044464,GO:0071944	corB~~~yfjD	220341.16503833	3.45e-283	775.0	COG4536@1|root,COG4536@2|Bacteria,1NZ99@1224|Proteobacteria,1RNCE@1236|Gammaproteobacteria,3ZKAM@590|Salmonella	1236|Gammaproteobacteria
g428	group_3374	aslB;	anaerobic sulfatase maturase;hypothetical protein	hit	C	Iron-sulfur cluster-binding domain	-	-	group_3374	90371.CY43_00180	6.76e-303	824.0	COG0641@1|root,COG0641@2|Bacteria,1MX3M@1224|Proteobacteria,1RN4R@1236|Gammaproteobacteria,3ZJAZ@590|Salmonella	1236|Gammaproteobacteria
g429	nhaB	;nhaB	Sodium/proton antiporter;Na(+)/H(+) antiporter NhaB	hit	P	) H( ) antiporter that extrudes sodium in exchange for external protons	nhaB	GO:0003674,GO:0005215,GO:0005451,GO:0005575,GO:0005623,GO:0005886,GO:0006810,GO:0006811,GO:0006812,GO:0006814,GO:0006873,GO:0006885,GO:0008150,GO:0008324,GO:0009987,GO:0010035,GO:0010038,GO:0010226,GO:0015075,GO:0015077,GO:0015078,GO:0015081,GO:0015291,GO:0015297,GO:0015298,GO:0015299,GO:0015318,GO:0015385,GO:0015491,GO:0015672,GO:0016020,GO:0019725,GO:0022804,GO:0022857,GO:0022890,GO:0030001,GO:…	nhaB	90371.CY43_09225	0.0	966.0	COG3067@1|root,COG3067@2|Bacteria,1MV0F@1224|Proteobacteria,1RPE3@1236|Gammaproteobacteria,3ZKCZ@590|Salmonella	1236|Gammaproteobacteria
g430	yifB	;yifB	hypothetical protein;YifB family Mg chelatase-like AAA ATPase	hit	O	Magnesium chelatase, subunit ChlI C-terminal	comM	GO:0003674,GO:0003824,GO:0004176,GO:0006508,GO:0006807,GO:0008150,GO:0008152,GO:0008233,GO:0016462,GO:0016787,GO:0016817,GO:0016818,GO:0016887,GO:0017111,GO:0019538,GO:0042623,GO:0043170,GO:0044238,GO:0070011,GO:0071704,GO:0140096,GO:1901564	yifB	90371.CY43_20425	0.0	979.0	COG0606@1|root,COG0606@2|Bacteria,1MU4R@1224|Proteobacteria,1RMB9@1236|Gammaproteobacteria,3ZKMP@590|Salmonella	1236|Gammaproteobacteria
g431	group_3373	tehB	cytoplasmic protein	hit	P	Domain of unknown function (DUF1971)	-	-	group_3373	90371.CY43_09235	6.78e-78	231.0	COG3615@1|root,COG3615@2|Bacteria,1RHB4@1224|Proteobacteria,1S6Q0@1236|Gammaproteobacteria,3ZMAJ@590|Salmonella	1236|Gammaproteobacteria
g432	group_3372	;ushA	hypothetical protein;5'-nucleotidase;multifunctional 2'3'-cyclic-nucleotide 2'-phosphodiesterase/5'-nucleotidase/3'-nucleotidase;5'-nucleotidase C-terminal domain-containing protein	hit	F	5'-nucleotidase, C-terminal domain	-	-	group_3372	220341.16504637	0.0	1031.0	COG0737@1|root,COG0737@2|Bacteria,1MX03@1224|Proteobacteria,1RPX3@1236|Gammaproteobacteria,3ZKTM@590|Salmonella	1236|Gammaproteobacteria
g433	rpsI	rpsI	30S ribosomal protein S9	hit	J	Belongs to the universal ribosomal protein uS9 family	rpsI	GO:0000462,GO:0003674,GO:0003676,GO:0003723,GO:0003735,GO:0005198,GO:0005488,GO:0005575,GO:0005622,GO:0005623,GO:0005737,GO:0005829,GO:0005840,GO:0006139,GO:0006364,GO:0006396,GO:0006412,GO:0006518,GO:0006725,GO:0006807,GO:0008150,GO:0008152,GO:0009058,GO:0009059,GO:0009987,GO:0010467,GO:0015935,GO:0016070,GO:0016072,GO:0019538,GO:0022613,GO:0022626,GO:0022627,GO:0030490,GO:0032991,GO:0034470,GO:…	rpsI	1006000.GKAS_00094	1.23e-83	247.0	COG0103@1|root,COG0103@2|Bacteria,1RD4A@1224|Proteobacteria,1S3Q7@1236|Gammaproteobacteria	1236|Gammaproteobacteria
g434	ftsK	ftsK;	DNA translocase FtsK	hit	D	Ftsk_gamma	ftsK	GO:0000920,GO:0003674,GO:0003676,GO:0003677,GO:0003824,GO:0005488,GO:0005515,GO:0005575,GO:0005623,GO:0005886,GO:0005887,GO:0006355,GO:0006950,GO:0006970,GO:0007059,GO:0008094,GO:0008150,GO:0009628,GO:0009651,GO:0009889,GO:0009891,GO:0009893,GO:0009987,GO:0010468,GO:0010556,GO:0010557,GO:0010604,GO:0010628,GO:0015616,GO:0016020,GO:0016021,GO:0016462,GO:0016787,GO:0016817,GO:0016818,GO:0016887,GO:…	ftsK	220341.16502124	0.0	2256.0	COG1674@1|root,COG3087@1|root,COG1674@2|Bacteria,COG3087@2|Bacteria,1MVPI@1224|Proteobacteria,1RM9A@1236|Gammaproteobacteria,3ZKXR@590|Salmonella	1236|Gammaproteobacteria
g435	group_3369		YebB family permuted papain-like enzyme;Permuted papain-like amidase enzyme YaeF/YiiX C92 family	hit	S	Permuted papain-like amidase enzyme, YaeF/YiiX, C92 family	yebB	-	group_3369	220341.16503144	8.54e-147	412.0	28IT1@1|root,2Z8S1@2|Bacteria,1PUT6@1224|Proteobacteria,1RYQC@1236|Gammaproteobacteria,3ZMZ4@590|Salmonella	1236|Gammaproteobacteria
g436	rpsH	rpsH	30S ribosomal protein S8	hit	J	One of the primary rRNA binding proteins, it binds directly to 16S rRNA central domain where it helps coordinate assembly of the platform of the 30S subunit	rpsH	GO:0000028,GO:0003674,GO:0003676,GO:0003723,GO:0003735,GO:0005198,GO:0005488,GO:0005575,GO:0005622,GO:0005623,GO:0005737,GO:0005829,GO:0005840,GO:0006412,GO:0006518,GO:0006807,GO:0006996,GO:0008150,GO:0008152,GO:0009058,GO:0009059,GO:0009894,GO:0009987,GO:0010467,GO:0010468,GO:0010608,GO:0015935,GO:0016043,GO:0019219,GO:0019222,GO:0019538,GO:0019843,GO:0022607,GO:0022613,GO:0022618,GO:0022626,GO:…	rpsH	1114922.CIFAM_27_00220	5.2e-85	251.0	COG0096@1|root,COG0096@2|Bacteria,1RDG3@1224|Proteobacteria,1S452@1236|Gammaproteobacteria,3WYA3@544|Citrobacter	1236|Gammaproteobacteria
g437	ydeI	ydeI	TIGR00156 family protein	hit	S	Bacterial OB fold (BOF) protein	ygiW	GO:0000302,GO:0006950,GO:0006979,GO:0008150,GO:0009636,GO:0009987,GO:0010035,GO:0010038,GO:0033554,GO:0034599,GO:0034614,GO:0035690,GO:0042221,GO:0042493,GO:0042542,GO:0042710,GO:0044010,GO:0044011,GO:0044764,GO:0046677,GO:0046686,GO:0050896,GO:0051703,GO:0051704,GO:0051716,GO:0070301,GO:0070887,GO:0071236,GO:0071241,GO:0071248,GO:0071276,GO:0090605,GO:0090609,GO:0097237,GO:1901700,GO:1901701	ydeI	220341.16504254	5.61e-80	238.0	COG3111@1|root,COG3111@2|Bacteria,1N9HJ@1224|Proteobacteria,1SCD7@1236|Gammaproteobacteria,3ZM9D@590|Salmonella	1236|Gammaproteobacteria
g438	flhe	flhe	flagellar protein FlhE	hit	N	Flagellar protein FlhE	flhE	GO:0005575,GO:0005623,GO:0006996,GO:0008150,GO:0009288,GO:0009987,GO:0016043,GO:0030030,GO:0042995,GO:0043226,GO:0043228,GO:0044464,GO:0044781,GO:0071840	flhe	220341.16503158	2.48e-92	269.0	294I9@1|root,2ZRXW@2|Bacteria,1RF8K@1224|Proteobacteria,1S3YK@1236|Gammaproteobacteria,3ZM6Y@590|Salmonella	1236|Gammaproteobacteria
g439	group_3364		L-fucose mutarotase	hit	G	Involved in the anomeric conversion of L-fucose	fucU	GO:0003674,GO:0003824,GO:0005488,GO:0005575,GO:0005622,GO:0005623,GO:0005737,GO:0016853,GO:0016854,GO:0016857,GO:0030246,GO:0036094,GO:0042806,GO:0044424,GO:0044464,GO:0048029	group_3364	220341.16504058	9.42e-95	276.0	COG4154@1|root,COG4154@2|Bacteria,1RJ03@1224|Proteobacteria,1S27Q@1236|Gammaproteobacteria,3ZMVW@590|Salmonella	1236|Gammaproteobacteria
g440	lytS	;lytS	Inner membrane protein YehU;Sensor histidine kinase;Putative sensor kinase;sensor histidine kinase	hit	T	5TMR of 5TMR-LYT	yehU	GO:0000160,GO:0005575,GO:0005623,GO:0005886,GO:0005887,GO:0006464,GO:0006468,GO:0006793,GO:0006796,GO:0006807,GO:0007154,GO:0007165,GO:0008150,GO:0008152,GO:0009987,GO:0016020,GO:0016021,GO:0016310,GO:0018106,GO:0018193,GO:0018202,GO:0019538,GO:0023052,GO:0031224,GO:0031226,GO:0035556,GO:0036211,GO:0043170,GO:0043412,GO:0044237,GO:0044238,GO:0044260,GO:0044267,GO:0044425,GO:0044459,GO:0044464,GO:…	lytS	90371.CY43_11620	0.0	1063.0	COG3275@1|root,COG3275@2|Bacteria,1QUB1@1224|Proteobacteria,1T1RX@1236|Gammaproteobacteria,3ZJEN@590|Salmonella	1236|Gammaproteobacteria
g441	gcl	;gcl	Glyoxylate carboligase (Tartronate-semialdehyde synthase);glyoxylate carboligase	hit	H	Thiamine pyrophosphate enzyme, N-terminal TPP binding domain	gcl	GO:0000166,GO:0003674,GO:0003824,GO:0005488,GO:0005515,GO:0006066,GO:0006081,GO:0006082,GO:0008150,GO:0008152,GO:0009028,GO:0009056,GO:0009436,GO:0009441,GO:0009987,GO:0016054,GO:0016829,GO:0016830,GO:0016831,GO:0017144,GO:0019752,GO:0019842,GO:0030976,GO:0032787,GO:0034308,GO:0034310,GO:0036094,GO:0042737,GO:0042802,GO:0043167,GO:0043168,GO:0043169,GO:0043436,GO:0044237,GO:0044248,GO:0044281,GO:…	gcl	220341.16501786	0.0	1169.0	COG3960@1|root,COG3960@2|Bacteria,1MV88@1224|Proteobacteria,1RW45@1236|Gammaproteobacteria,3ZMWF@590|Salmonella	1236|Gammaproteobacteria
g442	prpE	;prpE	Propionate--coA ligase;Propionate--CoA ligase;propionate--CoA ligase;Propionyl-CoA synthetase	hit	I	Acetyl-coenzyme A synthetase N-terminus	prpE	GO:0003674,GO:0003824,GO:0016405,GO:0016874,GO:0016877,GO:0016878,GO:0050218	prpE	90371.CY43_02175	0.0	1268.0	COG0365@1|root,COG0365@2|Bacteria,1MUF5@1224|Proteobacteria,1RR14@1236|Gammaproteobacteria,3ZM0N@590|Salmonella	1236|Gammaproteobacteria
g443	rpsK	rpsK;	30S ribosomal protein S11;hypothetical protein	hit	J	Located on the platform of the 30S subunit, it bridges several disparate RNA helices of the 16S rRNA. Forms part of the Shine-Dalgarno cleft in the 70S ribosome	rpsK	GO:0000028,GO:0000462,GO:0003674,GO:0003676,GO:0003723,GO:0003729,GO:0003735,GO:0005198,GO:0005488,GO:0005575,GO:0005622,GO:0005623,GO:0005737,GO:0005829,GO:0005840,GO:0006139,GO:0006364,GO:0006396,GO:0006412,GO:0006518,GO:0006725,GO:0006807,GO:0006996,GO:0008150,GO:0008152,GO:0009058,GO:0009059,GO:0009987,GO:0010467,GO:0015935,GO:0016043,GO:0016070,GO:0016072,GO:0019538,GO:0019843,GO:0022607,GO:…	rpsK	1006000.GKAS_02832	2.13e-88	259.0	COG0100@1|root,COG0100@2|Bacteria,1RD0A@1224|Proteobacteria,1S3Q2@1236|Gammaproteobacteria	1236|Gammaproteobacteria
g444	pldB	;pldB	Lysophospholipase L2;lysophospholipase L2	hit	I	alpha/beta hydrolase fold	pldB	GO:0003674,GO:0003824,GO:0004620,GO:0004622,GO:0005575,GO:0005623,GO:0005886,GO:0006629,GO:0008150,GO:0008152,GO:0016020,GO:0016298,GO:0016740,GO:0016746,GO:0016747,GO:0016787,GO:0016788,GO:0044238,GO:0044464,GO:0052689,GO:0071704,GO:0071944	pldB	90371.CY43_20725	2.3e-259	709.0	COG2267@1|root,COG2267@2|Bacteria,1MWDA@1224|Proteobacteria,1RRJP@1236|Gammaproteobacteria,3ZJZX@590|Salmonella	1236|Gammaproteobacteria
g445	nrfE	;nrfE	Cytochrome c-type biogenesis protein F2;hypothetical protein;Heme lyase CcmF/NrfE family subunit;Cytochrome c heme lyase subunit CcmF;Cytochrom-C-asm domain-containing protein;C-type cytochrome biogenesis protein CcmI;heme lyase NrfEFG subunit NrfE	hit	O	Cytochrome c-type biogenesis protein CcmF C-terminal	ccmF	GO:0003674,GO:0005488,GO:0005575,GO:0005623,GO:0005886,GO:0005887,GO:0006464,GO:0006807,GO:0008150,GO:0008152,GO:0009987,GO:0016020,GO:0016021,GO:0016043,GO:0017003,GO:0017004,GO:0017006,GO:0018063,GO:0019538,GO:0020037,GO:0022607,GO:0031224,GO:0031226,GO:0034622,GO:0036211,GO:0043170,GO:0043412,GO:0043933,GO:0044085,GO:0044237,GO:0044238,GO:0044260,GO:0044267,GO:0044425,GO:0044459,GO:0044464,GO:…	nrfE	220341.16503476	0.0	961.0	COG1138@1|root,COG1138@2|Bacteria,1MUQS@1224|Proteobacteria,1RMY5@1236|Gammaproteobacteria,3ZJH6@590|Salmonella	1236|Gammaproteobacteria
g446	nlpD	nlpD	murein hydrolase activator NlpD	hit	M	Lysin motif	nlpD	GO:0000920,GO:0001896,GO:0005575,GO:0005623,GO:0008150,GO:0008219,GO:0009279,GO:0009987,GO:0012501,GO:0016020,GO:0019867,GO:0030312,GO:0030313,GO:0031975,GO:0032153,GO:0042221,GO:0042493,GO:0043085,GO:0044093,GO:0044462,GO:0044464,GO:0050790,GO:0050896,GO:0051301,GO:0051336,GO:0051345,GO:0065007,GO:0065009,GO:0071944	nlpD	90371.CY43_15265	4.75e-249	686.0	COG1388@1|root,COG4942@1|root,COG1388@2|Bacteria,COG4942@2|Bacteria,1RD24@1224|Proteobacteria,1RR11@1236|Gammaproteobacteria,3ZIY8@590|Salmonella	1236|Gammaproteobacteria
g447	group_3336		hypothetical protein;fimbria/pilus outer membrane usher protein;Fimbria/pilus outer membrane usher protein;Outer membrane usher protein;outer membrane usher protein	hit	U	PapC C-terminal domain	htrE	GO:0003674,GO:0005215,GO:0005575,GO:0005623,GO:0006810,GO:0008150,GO:0009279,GO:0009297,GO:0009987,GO:0015267,GO:0015288,GO:0015473,GO:0016020,GO:0016043,GO:0019867,GO:0022607,GO:0022803,GO:0022829,GO:0022857,GO:0030030,GO:0030031,GO:0030312,GO:0030313,GO:0031975,GO:0043711,GO:0044085,GO:0044462,GO:0044464,GO:0051179,GO:0051234,GO:0055085,GO:0071840,GO:0071944	group_3336	220341.16501469	0.0	1711.0	COG3188@1|root,COG3188@2|Bacteria,1MUHE@1224|Proteobacteria,1RMPU@1236|Gammaproteobacteria,3ZK9N@590|Salmonella	1236|Gammaproteobacteria
g448	foxA	foxA	ferrioxamine B receptor FoxA	hit	M	TonB-dependent Receptor Plug Domain	foxA	-	foxA	90371.CY43_02140	0.0	1395.0	COG4773@1|root,COG4773@2|Bacteria,1QTT0@1224|Proteobacteria,1RNBT@1236|Gammaproteobacteria,3ZNGS@590|Salmonella	1236|Gammaproteobacteria
g449	ptrA	ptrA;	pitrilysin;Protease III	hit	O	Middle or third domain of peptidase_M16	ptrA	GO:0003674,GO:0003824,GO:0004175,GO:0004222,GO:0005488,GO:0005575,GO:0005622,GO:0005623,GO:0005737,GO:0006508,GO:0006807,GO:0008150,GO:0008152,GO:0008233,GO:0008237,GO:0008270,GO:0016787,GO:0019538,GO:0030288,GO:0030313,GO:0031975,GO:0042597,GO:0043167,GO:0043169,GO:0043170,GO:0044238,GO:0044424,GO:0044464,GO:0046872,GO:0046914,GO:0070011,GO:0071704,GO:0140096,GO:1901564	ptrA	90371.CY43_15620	0.0	1886.0	COG1025@1|root,COG1025@2|Bacteria,1QTVC@1224|Proteobacteria,1T1IG@1236|Gammaproteobacteria,3ZJ01@590|Salmonella	1236|Gammaproteobacteria
g450	group_3329		Autotransporter domain-containing protein;Putative surface-exposed virulence protein BigA;hypothetical protein;autotransporter domain-containing protein	hit	MU	domain, Protein	-	-	group_3329	90371.CY43_18085	0.0	1600.0	COG3210@1|root,COG3468@1|root,COG4625@1|root,COG3210@2|Bacteria,COG3468@2|Bacteria,COG4625@2|Bacteria,1Q9S2@1224|Proteobacteria,1RSN7@1236|Gammaproteobacteria,3ZKUW@590|Salmonella	1236|Gammaproteobacteria
g451	caiF	caiF	carnitine metabolism transcriptional regulator CaiF	hit	K	CaiF/GrlA transcriptional regulator	caiF	GO:0003674,GO:0003700,GO:0006139,GO:0006351,GO:0006355,GO:0006575,GO:0006577,GO:0006725,GO:0006807,GO:0008150,GO:0008152,GO:0009058,GO:0009059,GO:0009437,GO:0009889,GO:0009987,GO:0010467,GO:0010468,GO:0010556,GO:0016070,GO:0018130,GO:0019219,GO:0019222,GO:0019438,GO:0031323,GO:0031326,GO:0032774,GO:0034641,GO:0034645,GO:0034654,GO:0043170,GO:0044237,GO:0044238,GO:0044249,GO:0044260,GO:0044271,GO:…	caiF	1197719.A464_56	3.65e-90	264.0	2BXKV@1|root,30W1N@2|Bacteria,1RDQ6@1224|Proteobacteria,1S5BF@1236|Gammaproteobacteria,3ZM8U@590|Salmonella	1236|Gammaproteobacteria
g452	holB	;holB	hypothetical protein;DNA polymerase III subunit delta'	hit	L	DNA polymerase III, delta subunit, C terminal	holB	GO:0005575,GO:0005622,GO:0005623,GO:0006139,GO:0006259,GO:0006260,GO:0006261,GO:0006725,GO:0006807,GO:0008150,GO:0008152,GO:0009058,GO:0009059,GO:0009360,GO:0009987,GO:0032991,GO:0034641,GO:0034645,GO:0042575,GO:0043170,GO:0044237,GO:0044238,GO:0044249,GO:0044260,GO:0044424,GO:0044464,GO:0046483,GO:0061695,GO:0071704,GO:0090304,GO:1901360,GO:1901576,GO:1902494,GO:1990234	holB	220341.16502371	1.47e-244	671.0	COG0470@1|root,COG0470@2|Bacteria,1MY1W@1224|Proteobacteria,1RNYA@1236|Gammaproteobacteria,3ZK2C@590|Salmonella	1236|Gammaproteobacteria
g453	frdC	frdC	fumarate reductase subunit FrdC	hit	C	Seems to be involved in the anchoring of the catalytic components of the fumarate reductase complex to the cytoplasmic membrane	frdC	GO:0000104,GO:0001539,GO:0003674,GO:0003824,GO:0005575,GO:0005622,GO:0005623,GO:0005886,GO:0006091,GO:0006113,GO:0006928,GO:0006996,GO:0008150,GO:0008152,GO:0008177,GO:0009061,GO:0009987,GO:0015980,GO:0016020,GO:0016043,GO:0016491,GO:0016627,GO:0016635,GO:0022607,GO:0030030,GO:0030031,GO:0032991,GO:0040011,GO:0044085,GO:0044237,GO:0044424,GO:0044425,GO:0044459,GO:0044464,GO:0044780,GO:0044781,GO:…	frdC	220341.16505471	3.65e-90	264.0	COG3029@1|root,COG3029@2|Bacteria,1RD34@1224|Proteobacteria,1S419@1236|Gammaproteobacteria,3ZM6K@590|Salmonella	1236|Gammaproteobacteria
g454	yraN	yraN	YraN family protein	hit	L	Uncharacterised protein family UPF0102	yraN	-	yraN	90371.CY43_17005	3.79e-92	269.0	COG0792@1|root,COG0792@2|Bacteria,1N6VN@1224|Proteobacteria,1SC8A@1236|Gammaproteobacteria,3ZM50@590|Salmonella	1236|Gammaproteobacteria
g455	yecN	yecN	Inner membrane protein YecN	hit	S	MAPEG family	yecN	GO:0005575,GO:0005623,GO:0005886,GO:0016020,GO:0044464,GO:0071944	yecN	220341.16503151	2.47e-88	259.0	COG3788@1|root,COG3788@2|Bacteria,1RDHP@1224|Proteobacteria,1S3PN@1236|Gammaproteobacteria,3ZM8H@590|Salmonella	1236|Gammaproteobacteria
g456	rpsF	rpsF	30S ribosomal protein S6	hit	J	Binds together with S18 to 16S ribosomal RNA	rpsF	GO:0003674,GO:0003676,GO:0003723,GO:0003729,GO:0003735,GO:0005198,GO:0005488,GO:0005575,GO:0005622,GO:0005623,GO:0005737,GO:0005829,GO:0005840,GO:0006412,GO:0006518,GO:0006807,GO:0008150,GO:0008152,GO:0009058,GO:0009059,GO:0009987,GO:0010467,GO:0015935,GO:0019538,GO:0019843,GO:0022626,GO:0022627,GO:0032991,GO:0034641,GO:0034645,GO:0043043,GO:0043170,GO:0043226,GO:0043228,GO:0043229,GO:0043232,GO:…	rpsF	1197719.A464_4398	2.03e-87	257.0	COG0360@1|root,COG0360@2|Bacteria,1RH82@1224|Proteobacteria,1S5VU@1236|Gammaproteobacteria,3ZM7U@590|Salmonella	1236|Gammaproteobacteria
g457	ygdD	ygdD	DUF423 domain-containing protein	hit	S	Protein of unknown function (DUF423)	ygdD	GO:0005575,GO:0005623,GO:0005886,GO:0016020,GO:0044464,GO:0071944	ygdD	220341.16504061	1.67e-86	254.0	COG2363@1|root,COG2363@2|Bacteria,1MZX3@1224|Proteobacteria,1SCNB@1236|Gammaproteobacteria,3ZM8I@590|Salmonella	1236|Gammaproteobacteria
g458	group_3308		Exported protein;acyloxyacyl hydrolase	hit	S	Lipid A 3-O-deacylase (PagL)	-	-	group_3308	90371.CY43_12055	1.33e-134	380.0	2ECYV@1|root,336VV@2|Bacteria,1NB57@1224|Proteobacteria,1SQ8X@1236|Gammaproteobacteria,3ZNBD@590|Salmonella	1236|Gammaproteobacteria
g459	robA	;robA	Right origin-binding protein;MDR efflux pump AcrAB transcriptional activator RobA	hit	K	Integron-associated effector binding protein	rob	GO:0003674,GO:0003676,GO:0003677,GO:0003824,GO:0005488,GO:0005575,GO:0005622,GO:0005623,GO:0005737,GO:0005829,GO:0006081,GO:0006082,GO:0006089,GO:0008150,GO:0008152,GO:0009056,GO:0009058,GO:0009438,GO:0009987,GO:0016053,GO:0016829,GO:0016835,GO:0016836,GO:0019172,GO:0019243,GO:0019249,GO:0019752,GO:0032787,GO:0042180,GO:0042182,GO:0043436,GO:0043565,GO:0044237,GO:0044248,GO:0044249,GO:0044281,GO:…	robA	90371.CY43_23860	9.01e-216	595.0	COG2207@1|root,COG3708@1|root,COG2207@2|Bacteria,COG3708@2|Bacteria,1MWTF@1224|Proteobacteria,1RQMF@1236|Gammaproteobacteria,3ZJFD@590|Salmonella	1236|Gammaproteobacteria
g460	dsbI	dsbI;	protein-disulfide oxidoreductase DsbI;Disulfide isomerase	hit	C	Required for disulfide bond formation in some proteins. Part of a redox system composed of DsbI and DsbL that mediates formation of an essential disulfide bond in AssT	dsbI	-	dsbI	220341.16504271	6.66e-166	463.0	COG1495@1|root,COG1495@2|Bacteria,1R6UC@1224|Proteobacteria,1RY51@1236|Gammaproteobacteria,3ZKWU@590|Salmonella	1236|Gammaproteobacteria
g461	group_3276	;tkt	Transketolase;transketolase	hit	G	Catalyzes the transfer of a two-carbon ketol group from a ketose donor to an aldose acceptor, via a covalent intermediate with the cofactor thiamine pyrophosphate	tktA	GO:0003674,GO:0003824,GO:0004802,GO:0006081,GO:0006098,GO:0006139,GO:0006725,GO:0006732,GO:0006733,GO:0006739,GO:0006753,GO:0006793,GO:0006796,GO:0006807,GO:0008150,GO:0008152,GO:0009117,GO:0009987,GO:0016740,GO:0016744,GO:0019362,GO:0019637,GO:0019682,GO:0019693,GO:0034641,GO:0044237,GO:0044238,GO:0044281,GO:0046483,GO:0046496,GO:0051156,GO:0051186,GO:0055086,GO:0071704,GO:0072524,GO:1901135,GO:…	group_3276	90371.CY43_16040	0.0	1335.0	COG0021@1|root,COG0021@2|Bacteria,1MUEY@1224|Proteobacteria,1RMWP@1236|Gammaproteobacteria,3ZJBI@590|Salmonella	1236|Gammaproteobacteria
g462	zapG	zapG	Z-ring associated protein ZapG	hit	S	Protein of unknown function (DUF1043)	yhcB	GO:0005575,GO:0005622,GO:0005623,GO:0005737,GO:0005829,GO:0005886,GO:0005887,GO:0016020,GO:0016021,GO:0031224,GO:0031226,GO:0044424,GO:0044425,GO:0044444,GO:0044459,GO:0044464,GO:0071944	zapG	1197719.A464_3434	4.25e-85	251.0	COG3105@1|root,COG3105@2|Bacteria,1RE90@1224|Proteobacteria,1S3S2@1236|Gammaproteobacteria,3ZM5I@590|Salmonella	1236|Gammaproteobacteria
g463	yohJ	yohJ	UPF0299 membrane protein YohJ	hit	S	LrgA family	yohJ	GO:0005575,GO:0005623,GO:0005886,GO:0016020,GO:0044464,GO:0071944	yohJ	220341.16503421	1.39e-65	202.0	COG1380@1|root,COG1380@2|Bacteria,1NAY3@1224|Proteobacteria,1SD5V@1236|Gammaproteobacteria,3ZM8B@590|Salmonella	1236|Gammaproteobacteria
g464	yqjE	yqjE	Phage holin family protein	hit	S	Putative Actinobacterial Holin-X, holin superfamily III	yqjE	GO:0005575,GO:0005623,GO:0005886,GO:0016020,GO:0044464,GO:0071944	yqjE	220341.16504305	9.25e-80	238.0	COG5393@1|root,COG5393@2|Bacteria,1RHS9@1224|Proteobacteria,1S5UU@1236|Gammaproteobacteria,3ZM7X@590|Salmonella	1236|Gammaproteobacteria
g465	fadM	fadM	long-chain acyl-CoA thioesterase FadM	hit	S	Thioesterase-like superfamily	tesC	GO:0003674,GO:0003824,GO:0006082,GO:0006629,GO:0006631,GO:0006635,GO:0008150,GO:0008152,GO:0009056,GO:0009062,GO:0009987,GO:0016042,GO:0016054,GO:0016289,GO:0016787,GO:0016788,GO:0016790,GO:0019395,GO:0019752,GO:0030258,GO:0032787,GO:0034440,GO:0043436,GO:0044237,GO:0044238,GO:0044242,GO:0044248,GO:0044255,GO:0044281,GO:0044282,GO:0046395,GO:0047617,GO:0055114,GO:0071704,GO:0072329,GO:1901575	fadM	220341.16501725	5.37e-88	258.0	COG0824@1|root,COG0824@2|Bacteria,1REIH@1224|Proteobacteria,1S40Z@1236|Gammaproteobacteria,3ZM6V@590|Salmonella	1236|Gammaproteobacteria
g466	prgJ	;prgJ	Type III secretion system protein PrgJ;hypothetical protein;type III secretion system inner rod protein PrgJ	hit	-	-	prgJ	-	prgJ	220341.16503950	1.83e-60	186.0	2EHBC@1|root,33B37@2|Bacteria,1NN72@1224|Proteobacteria,1SH9W@1236|Gammaproteobacteria,3ZMEB@590|Salmonella	1236|Gammaproteobacteria
g467	oapA	;oapA	hypothetical protein;Diguanylate phosphodiesterase;Cell envelope opacity-associated protein;Cell division protein YtfB	hit	M	Opacity-associated protein A LysM-like domain	ytfB	-	oapA	90371.CY43_22910	3.01e-137	389.0	COG3061@1|root,COG3061@2|Bacteria,1R4XK@1224|Proteobacteria,1S430@1236|Gammaproteobacteria,3ZJQ1@590|Salmonella	1236|Gammaproteobacteria
g468	group_3259	;sdaC	HAAAP family transport protein;transporter;Serine transporter	hit	E	transporter	yhjV	GO:0005575,GO:0005623,GO:0005886,GO:0008150,GO:0009314,GO:0009628,GO:0016020,GO:0044464,GO:0050896,GO:0071944	group_3259	90371.CY43_18825	9.76e-295	806.0	COG0814@1|root,COG0814@2|Bacteria,1PCGR@1224|Proteobacteria,1RSH4@1236|Gammaproteobacteria,3ZJ9P@590|Salmonella	1236|Gammaproteobacteria
g469	yeiB	yeiB;	DUF418 domain-containing protein;Putative membrane protein YeiB	hit	S	Protein of unknown function (DUF418)	yeiB	GO:0005575,GO:0005623,GO:0005886,GO:0016020,GO:0044464,GO:0071944	yeiB	90371.CY43_11785	9.33e-264	724.0	COG2311@1|root,COG2311@2|Bacteria,1MWHW@1224|Proteobacteria,1RQ08@1236|Gammaproteobacteria,3ZK3W@590|Salmonella	1236|Gammaproteobacteria
g470	ybbP	ybbP	putative ABC-type transport system involved in lysophospholipase L1 biosynthesis permease component;ABC transporter permease	hit	Q	FtsX-like permease family	ybbP	GO:0005575,GO:0005623,GO:0005886,GO:0016020,GO:0044464,GO:0071944	ybbP	90371.CY43_02880	0.0	1491.0	COG3127@1|root,COG3127@2|Bacteria,1MU9R@1224|Proteobacteria,1RM8Y@1236|Gammaproteobacteria,3ZJV3@590|Salmonella	1236|Gammaproteobacteria
g471	hupA	;hupA	Transcriptional regulator HU subunit alpha;NS2;DNA-binding protein HU-alpha;Histone like DNA-binding protein HU-alpha	hit	L	Histone-like DNA-binding protein which is capable of wrapping DNA to stabilize it, and thus to prevent its denaturation under extreme environmental conditions	hupA	GO:0003674,GO:0003676,GO:0003677,GO:0005488,GO:0005515,GO:0005575,GO:0005622,GO:0005623,GO:0005694,GO:0005737,GO:0005829,GO:0006139,GO:0006323,GO:0006351,GO:0006725,GO:0006807,GO:0006950,GO:0006974,GO:0006996,GO:0008150,GO:0008152,GO:0009058,GO:0009059,GO:0009295,GO:0009889,GO:0009987,GO:0010467,GO:0010556,GO:0016043,GO:0016070,GO:0018130,GO:0019219,GO:0019222,GO:0019438,GO:0031323,GO:0031326,GO:…	hupA	1006000.GKAS_03746	8.61e-54	169.0	COG0776@1|root,COG0776@2|Bacteria,1MZ5B@1224|Proteobacteria,1S8VH@1236|Gammaproteobacteria	1236|Gammaproteobacteria
g472	group_3239	;sgrR	Oligopeptide ABC transporter substrate-binding protein OppA;ABC transporter substrate-binding protein;peptide ABC transporter substrate-binding protein	hit	S	Sugar transport-related sRNA regulator N-term	ybaE	GO:0005575,GO:0005623,GO:0030288,GO:0030313,GO:0031975,GO:0042597,GO:0044464	group_3239	90371.CY43_02620	0.0	1167.0	COG4533@1|root,COG4533@2|Bacteria,1PIAC@1224|Proteobacteria,1RPRW@1236|Gammaproteobacteria,3ZK2S@590|Salmonella	1236|Gammaproteobacteria
g473	rsmE	;rsmE	hypothetical protein;RsmE family RNA methyltransferase;16S rRNA (uracil(1498)-N(3))-methyltransferase	hit	H	Specifically methylates the N3 position of the uracil ring of uridine 1498 (m3U1498) in 16S rRNA. Acts on the fully assembled 30S ribosomal subunit	rsmE	GO:0000154,GO:0001510,GO:0003674,GO:0003824,GO:0006139,GO:0006364,GO:0006396,GO:0006725,GO:0006807,GO:0008150,GO:0008152,GO:0008168,GO:0008170,GO:0008173,GO:0008649,GO:0008757,GO:0009451,GO:0009987,GO:0010467,GO:0016070,GO:0016072,GO:0016436,GO:0016740,GO:0016741,GO:0022613,GO:0031167,GO:0032259,GO:0034470,GO:0034641,GO:0034660,GO:0042254,GO:0043170,GO:0043412,GO:0043414,GO:0044085,GO:0044237,GO:…	rsmE	90371.CY43_16130	7.74e-174	484.0	COG1385@1|root,COG1385@2|Bacteria,1MXCU@1224|Proteobacteria,1RPBN@1236|Gammaproteobacteria,3ZK6Y@590|Salmonella	1236|Gammaproteobacteria
g474	group_3233		Membrane protein	hit	S	Protein of unknown function (DUF2593)	ybjO	GO:0005575,GO:0005623,GO:0005886,GO:0016020,GO:0044464,GO:0071944	group_3233	90371.CY43_04715	6.19e-86	254.0	2E0RG@1|root,32W9M@2|Bacteria,1RGQB@1224|Proteobacteria,1S32T@1236|Gammaproteobacteria,3ZJRT@590|Salmonella	1236|Gammaproteobacteria
g475	hslR	hslR	ribosome-associated heat shock protein Hsp15	hit	J	S4 RNA-binding domain	hslR	GO:0003674,GO:0003676,GO:0003677,GO:0003723,GO:0003727,GO:0005488,GO:0005575,GO:0005622,GO:0005623,GO:0005737,GO:0005829,GO:0006139,GO:0006725,GO:0006807,GO:0006950,GO:0008150,GO:0008152,GO:0009266,GO:0009408,GO:0009451,GO:0009628,GO:0009987,GO:0016070,GO:0033554,GO:0034605,GO:0034641,GO:0043021,GO:0043023,GO:0043170,GO:0043412,GO:0044237,GO:0044238,GO:0044424,GO:0044444,GO:0044464,GO:0044877,GO:…	hslR	90371.CY43_18180	1.6e-85	252.0	COG1188@1|root,COG1188@2|Bacteria,1MZR6@1224|Proteobacteria,1S8VU@1236|Gammaproteobacteria,3ZM6H@590|Salmonella	1236|Gammaproteobacteria
g476	group_3230		DUF2531 domain-containing protein	hit	S	Protein of unknown function (DUF2531)	hofP	GO:0006139,GO:0006259,GO:0006308,GO:0006725,GO:0006807,GO:0008150,GO:0008152,GO:0009056,GO:0009057,GO:0009987,GO:0015976,GO:0019439,GO:0034641,GO:0034655,GO:0043170,GO:0044237,GO:0044238,GO:0044248,GO:0044260,GO:0044265,GO:0044270,GO:0046483,GO:0046700,GO:0071704,GO:0090304,GO:1901360,GO:1901361,GO:1901575	group_3230	220341.16505104	2.76e-95	277.0	2EBIY@1|root,335JD@2|Bacteria,1N98X@1224|Proteobacteria,1SEDR@1236|Gammaproteobacteria,3ZMAW@590|Salmonella	1236|Gammaproteobacteria
g477	rbfA	rbfA	30S ribosome-binding factor RbfA	hit	J	One of several proteins that assist in the late maturation steps of the functional core of the 30S ribosomal subunit. Associates with free 30S ribosomal subunits (but not with 30S subunits that are part of 70S ribosomes or polysomes). Required for efficient processing of 16S rRNA. May interact with the 5'-terminal helix region of 16S rRNA	rbfA	GO:0003674,GO:0005488,GO:0005575,GO:0005622,GO:0005623,GO:0005737,GO:0005829,GO:0006139,GO:0006364,GO:0006396,GO:0006725,GO:0006807,GO:0006950,GO:0006974,GO:0008150,GO:0008152,GO:0009266,GO:0009409,GO:0009628,GO:0009987,GO:0010467,GO:0016070,GO:0016072,GO:0022613,GO:0030490,GO:0033554,GO:0034470,GO:0034641,GO:0034660,GO:0042254,GO:0042274,GO:0043021,GO:0043024,GO:0043170,GO:0044085,GO:0044237,GO:…	rbfA	90371.CY43_17105	1.94e-86	254.0	COG0858@1|root,COG0858@2|Bacteria,1MZPE@1224|Proteobacteria,1S9AF@1236|Gammaproteobacteria,3ZM7I@590|Salmonella	1236|Gammaproteobacteria
g478	agaS	;agaS	hypothetical protein;phosphohistidinoprotein-hexose phosphotransferase;Putative phosphosugar-binding protein	hit	M	SIS domain	-	-	agaS	90371.CY43_18690	3.74e-240	659.0	COG2222@1|root,COG2222@2|Bacteria,1Q9B7@1224|Proteobacteria,1S0T0@1236|Gammaproteobacteria,3ZKP7@590|Salmonella	1236|Gammaproteobacteria
g479	fkpA	fkpA	FKBP-type peptidyl-prolyl cis-trans isomerase	hit	M	Domain amino terminal to FKBP-type peptidyl-prolyl isomerase	fkpA	-	fkpA	90371.CY43_17960	1.19e-171	481.0	COG0545@1|root,COG0545@2|Bacteria,1RDA1@1224|Proteobacteria,1RRKU@1236|Gammaproteobacteria,3ZKH6@590|Salmonella	1236|Gammaproteobacteria
g480	hutU	hutU	urocanate hydratase	hit	E	Catalyzes the conversion of urocanate to 4-imidazolone- 5-propionate	hutU	-	hutU	90371.CY43_04250	0.0	1119.0	COG2987@1|root,COG2987@2|Bacteria,1MU4W@1224|Proteobacteria,1RP89@1236|Gammaproteobacteria,3ZJZW@590|Salmonella	1236|Gammaproteobacteria
g481	sTM0266~~~tssA1	;sTM0266;tssA1	ImpA-N domain-containing protein;hypothetical protein;Cytoplasmic protein;cytoplasmic protein	hit	S	Type VI secretion-associated protein, impa family	-	-	sTM0266~~~tssA1	90371.CY43_01335	3.07e-241	664.0	COG3515@1|root,COG3515@2|Bacteria,1NK35@1224|Proteobacteria,1RTKN@1236|Gammaproteobacteria,3ZN6D@590|Salmonella	1236|Gammaproteobacteria
g482	group_3210		DUF2756 domain-containing protein	hit	S	Protein of unknown function (DUF2756)	yhhA	-	group_3210	90371.CY43_18450	6.04e-72	218.0	2D4KK@1|root,32THA@2|Bacteria,1N0WI@1224|Proteobacteria,1SAJI@1236|Gammaproteobacteria,3ZMH3@590|Salmonella	1236|Gammaproteobacteria
g483	ptsG2	;ptsG2	hypothetical protein;PTS system IIBC component;PTS transporter subunit EIIC;PTS-EIIC domain-containing protein;PTS system N-acetylmuramic acid-specific IIB component / PTS system N-acetylmuramic acid-specific IIC component;PTS sugar transporter subunit IIC	hit	G	phosphotransferase system, EIIB	murP	-	ptsG2	90371.CY43_13705	5.24e-312	852.0	COG1263@1|root,COG1264@1|root,COG1263@2|Bacteria,COG1264@2|Bacteria,1N3C1@1224|Proteobacteria,1RQMX@1236|Gammaproteobacteria,3ZJZU@590|Salmonella	1236|Gammaproteobacteria
g484	group_3203		Uncharacterized protein YiiR;DUF805 domain-containing protein	hit	S	Protein of unknown function (DUF805)	yiiR	GO:0005575,GO:0005623,GO:0005886,GO:0016020,GO:0044464,GO:0071944	group_3203	220341.16504656	2.49e-100	290.0	COG3152@1|root,COG3152@2|Bacteria,1RD1M@1224|Proteobacteria,1S2CI@1236|Gammaproteobacteria,3ZM5V@590|Salmonella	1236|Gammaproteobacteria
g485	group_3199		Putative inner membrane protein YbhQ	hit	S	Putative inner membrane protein YbhQ	ybhQ	GO:0005575,GO:0005623,GO:0005886,GO:0016020,GO:0044464,GO:0071944	group_3199	220341.16502028	2.53e-88	259.0	2CICU@1|root,2ZPQP@2|Bacteria,1REJF@1224|Proteobacteria,1S4G4@1236|Gammaproteobacteria,3ZM70@590|Salmonella	1236|Gammaproteobacteria
g486	celF~~~chbF	;celF;chbF	Chitobiose-specific 6-phospho-beta-glucosidase ChbF;Alpha-galactosidase/6-phospho-beta-glucosidase family 4 of glycosyl hydrolase;6-phospho-beta-glucosidase	hit	G	Family 4 glycosyl hydrolase	chbF	GO:0003674,GO:0003824,GO:0004553,GO:0005488,GO:0005515,GO:0008422,GO:0008706,GO:0015926,GO:0016787,GO:0016798,GO:0042802	celF~~~chbF	220341.16502875	0.0	907.0	COG1486@1|root,COG1486@2|Bacteria,1NI6G@1224|Proteobacteria,1RPG8@1236|Gammaproteobacteria,3ZJ97@590|Salmonella	1236|Gammaproteobacteria
g487	spoVV	;spoVV	Gate domain-containing protein;Uncharacterized protein YjiH	hit	S	Nucleoside recognition	yjiH	GO:0005575,GO:0005623,GO:0005886,GO:0016020,GO:0044464,GO:0071944	spoVV	220341.16505631	2.13e-152	429.0	COG3366@1|root,COG3366@2|Bacteria,1NP3U@1224|Proteobacteria,1RNFQ@1236|Gammaproteobacteria,3ZKP0@590|Salmonella	1236|Gammaproteobacteria
g488	ygiD	ygiD;	45-DOPA dioxygenase extradiol;LigB family dioxygenase	hit	S	Catalytic LigB subunit of aromatic ring-opening dioxygenase	ygiD	GO:0003674,GO:0003824,GO:0008150,GO:0008152,GO:0016491,GO:0046566,GO:0051213,GO:0055114	ygiD	220341.16504267	8.24e-200	552.0	COG3384@1|root,COG3384@2|Bacteria,1MXJZ@1224|Proteobacteria,1RR5P@1236|Gammaproteobacteria,3ZJBG@590|Salmonella	1236|Gammaproteobacteria
g489	gutQ	;gutQ	Phosphosugar binding protein;arabinose-5-phosphate isomerase GutQ	hit	F	SIS domain	gutQ	GO:0000271,GO:0003674,GO:0003824,GO:0005975,GO:0005976,GO:0005996,GO:0006082,GO:0006629,GO:0008150,GO:0008152,GO:0008610,GO:0008653,GO:0009058,GO:0009059,GO:0009103,GO:0009987,GO:0016051,GO:0016053,GO:0016853,GO:0016860,GO:0016861,GO:0019146,GO:0019294,GO:0019752,GO:0033692,GO:0034637,GO:0034645,GO:0043170,GO:0043436,GO:0044237,GO:0044238,GO:0044249,GO:0044255,GO:0044260,GO:0044262,GO:0044264,GO:…	gutQ	220341.16503916	6.33e-226	623.0	COG0517@1|root,COG0794@1|root,COG0517@2|Bacteria,COG0794@2|Bacteria,1MUXD@1224|Proteobacteria,1RMT9@1236|Gammaproteobacteria,3ZKR8@590|Salmonella	1236|Gammaproteobacteria
g490	flgC	flgC	flagellar basal body rod protein FlgC	hit	N	Flagellar basal body rod FlgEFG protein C-terminal	flgC	GO:0001539,GO:0005575,GO:0005623,GO:0006928,GO:0008150,GO:0009288,GO:0009424,GO:0009425,GO:0009987,GO:0040011,GO:0042995,GO:0043226,GO:0043228,GO:0044422,GO:0044461,GO:0044463,GO:0044464,GO:0048870,GO:0051179,GO:0051674,GO:0071973,GO:0071978,GO:0097588	flgC	220341.16502345	1.72e-85	252.0	COG1558@1|root,COG1558@2|Bacteria,1RHI3@1224|Proteobacteria,1S653@1236|Gammaproteobacteria,3ZM73@590|Salmonella	1236|Gammaproteobacteria
g491	group_3191		Membrane protein;DUF4310 domain-containing protein	hit	S	Domain of unknown function (DUF4310)	-	-	group_3191	90371.CY43_23150	1.04e-134	383.0	2CHGF@1|root,2Z7QV@2|Bacteria,1R5Q8@1224|Proteobacteria,1RNU0@1236|Gammaproteobacteria,3ZJ6S@590|Salmonella	1236|Gammaproteobacteria
g492	group_3190		cytoplasmic protein	hit	S	Domain of unknown function (DUF4312)	-	-	group_3190	90371.CY43_23140	3.31e-58	181.0	2AJY2@1|root,31AM7@2|Bacteria,1RJ79@1224|Proteobacteria,1S5YU@1236|Gammaproteobacteria,3ZMGF@590|Salmonella	1236|Gammaproteobacteria
g493	rcsF	rcsF	Rcs stress response system protein RcsF	hit	M	Essential component of the Rcs signaling system, which controls transcription of numerous genes. Plays a role in signal transduction from the cell surface to the histidine kinase RcsC. May detect outer membrane defects	rcsF	GO:0000271,GO:0005575,GO:0005623,GO:0005975,GO:0005976,GO:0007154,GO:0007165,GO:0008150,GO:0008152,GO:0009058,GO:0009059,GO:0009242,GO:0009279,GO:0009987,GO:0016020,GO:0016051,GO:0019867,GO:0023052,GO:0030312,GO:0030313,GO:0031240,GO:0031241,GO:0031975,GO:0033692,GO:0034637,GO:0034645,GO:0035556,GO:0043170,GO:0044237,GO:0044238,GO:0044249,GO:0044260,GO:0044262,GO:0044264,GO:0044425,GO:0044462,GO:…	rcsF	1197719.A464_249	1.94e-91	267.0	2B4JI@1|root,31XBN@2|Bacteria,1RIKW@1224|Proteobacteria,1S6DZ@1236|Gammaproteobacteria,3ZM8A@590|Salmonella	1236|Gammaproteobacteria
g494	sdhC	sdhC	succinate dehydrogenase cytochrome b556 subunit	hit	C	Succinate dehydrogenase/Fumarate reductase transmembrane subunit	sdhC	GO:0000104,GO:0003674,GO:0003824,GO:0005488,GO:0005575,GO:0005623,GO:0005886,GO:0006091,GO:0008150,GO:0008152,GO:0008177,GO:0009055,GO:0009060,GO:0009987,GO:0015980,GO:0016020,GO:0016043,GO:0016491,GO:0016627,GO:0016635,GO:0017004,GO:0020037,GO:0022607,GO:0022900,GO:0034622,GO:0043933,GO:0044085,GO:0044237,GO:0044464,GO:0045333,GO:0046906,GO:0048037,GO:0048038,GO:0048039,GO:0055114,GO:0065003,GO:…	sdhC	90371.CY43_03945	1.04e-86	255.0	COG2009@1|root,COG2009@2|Bacteria,1RIGZ@1224|Proteobacteria,1S5ZE@1236|Gammaproteobacteria,3ZM7D@590|Salmonella	1236|Gammaproteobacteria
g495	yjjI	;yjjI	Putative PFL-like glycyl radical enzyme;DUF3029 domain-containing protein;Uncharacterized protein YjjI	hit	F	Protein of unknown function (DUF3029)	yjjI	GO:0006091,GO:0008150,GO:0008152,GO:0009061,GO:0009987,GO:0015980,GO:0044237,GO:0045333,GO:0055114	yjjI	90371.CY43_23760	0.0	1036.0	COG1328@1|root,COG1328@2|Bacteria,1N1EN@1224|Proteobacteria,1RP1S@1236|Gammaproteobacteria,3ZJ6P@590|Salmonella	1236|Gammaproteobacteria
g496	ybgC	ybgC	tol-pal system-associated acyl-CoA thioesterase	hit	S	Thioesterase-like superfamily	ybgC	GO:0003674,GO:0003824,GO:0016787,GO:0016788,GO:0016790	ybgC	90371.CY43_04020	3.22e-90	264.0	COG0824@1|root,COG0824@2|Bacteria,1MZH6@1224|Proteobacteria,1S93F@1236|Gammaproteobacteria,3ZM7A@590|Salmonella	1236|Gammaproteobacteria
g497	spaS	;spaS	hypothetical protein;Virulence associated secretory protein;EscU/YscU/HrcU family type III secretion system export apparatus switch protein;SPI-1 type III secretion system export apparatus protein SpaS	hit	NU	FlhB HrpN YscU SpaS Family	spaS	-	spaS	220341.16503965	4.33e-239	659.0	COG1377@1|root,COG1377@2|Bacteria,1NC6M@1224|Proteobacteria,1RRI9@1236|Gammaproteobacteria,3ZJVA@590|Salmonella	1236|Gammaproteobacteria
g498	wzzfepE	wzz(fepE)	LPS O-antigen length regulator Wzz(fepE)	hit	M	Chain length determinant protein	fepE	GO:0000041,GO:0003674,GO:0005215,GO:0005575,GO:0005623,GO:0005886,GO:0006810,GO:0006811,GO:0006812,GO:0006820,GO:0006826,GO:0008150,GO:0015343,GO:0015620,GO:0015682,GO:0015685,GO:0015688,GO:0015711,GO:0015850,GO:0015891,GO:0016020,GO:0022857,GO:0030001,GO:0042930,GO:0044464,GO:0044718,GO:0051179,GO:0051181,GO:0051184,GO:0051234,GO:0055085,GO:0071702,GO:0071944,GO:0072512,GO:1901678	wzzfepE	90371.CY43_03230	1.26e-265	728.0	COG3765@1|root,COG3765@2|Bacteria,1N0EC@1224|Proteobacteria,1RR0I@1236|Gammaproteobacteria,3ZM4Q@590|Salmonella	1236|Gammaproteobacteria
g499	manZ	;manZ	hypothetical protein;PTS mannose transporter subunit IID	hit	G	PTS system mannose/fructose/sorbose family IID component	manZ	GO:0003674,GO:0003824,GO:0005215,GO:0005575,GO:0005623,GO:0005886,GO:0005887,GO:0006810,GO:0008150,GO:0008643,GO:0008645,GO:0008982,GO:0009401,GO:0015144,GO:0015145,GO:0015149,GO:0015578,GO:0015749,GO:0015761,GO:0016020,GO:0016021,GO:0016740,GO:0016772,GO:0016773,GO:0022804,GO:0022857,GO:0022870,GO:0031224,GO:0031226,GO:0034219,GO:0044425,GO:0044459,GO:0044464,GO:0046323,GO:0051119,GO:0051179,GO:…	manZ	220341.16503018	2.15e-200	555.0	COG3716@1|root,COG3716@2|Bacteria,1MWTZ@1224|Proteobacteria,1RNSD@1236|Gammaproteobacteria,3ZK7E@590|Salmonella	1236|Gammaproteobacteria
g500	ppsA	;ppsA	Phosphoenolpyruvate synthase;phosphoenolpyruvate synthase	hit	H	Catalyzes the phosphorylation of pyruvate to phosphoenolpyruvate	ppsA	GO:0000287,GO:0003674,GO:0003824,GO:0005488,GO:0005575,GO:0005622,GO:0005623,GO:0005737,GO:0005829,GO:0005975,GO:0005996,GO:0006006,GO:0006094,GO:0006793,GO:0006796,GO:0008150,GO:0008152,GO:0008986,GO:0009058,GO:0009987,GO:0016051,GO:0016301,GO:0016310,GO:0016740,GO:0016772,GO:0016781,GO:0019318,GO:0019319,GO:0043167,GO:0043169,GO:0044237,GO:0044238,GO:0044281,GO:0044283,GO:0044424,GO:0044444,GO:…	ppsA	220341.16502841	0.0	1564.0	COG0574@1|root,COG1080@1|root,COG0574@2|Bacteria,COG1080@2|Bacteria,1MU0R@1224|Proteobacteria,1RP3T@1236|Gammaproteobacteria,3ZIZX@590|Salmonella	1236|Gammaproteobacteria
g501	group_3166		hypothetical protein	no-hit
g502	deoR	;deoR	DNA-binding transcriptional repressor DeoR	hit	K	DeoR C terminal sensor domain	deoR	GO:0000976,GO:0000984,GO:0000986,GO:0000987,GO:0001017,GO:0001067,GO:0003674,GO:0003676,GO:0003677,GO:0003690,GO:0005488,GO:0006355,GO:0008150,GO:0009889,GO:0009890,GO:0009892,GO:0010468,GO:0010556,GO:0010558,GO:0010605,GO:0010629,GO:0019219,GO:0019222,GO:0031323,GO:0031324,GO:0031326,GO:0031327,GO:0031333,GO:0043254,GO:0043565,GO:0044087,GO:0044212,GO:0045892,GO:0045934,GO:0048519,GO:0048523,GO:…	deoR	220341.16502067	2.22e-182	507.0	COG1349@1|root,COG1349@2|Bacteria,1MY40@1224|Proteobacteria,1RR32@1236|Gammaproteobacteria,3ZIUX@590|Salmonella	1236|Gammaproteobacteria
g503	fliS	fliS	flagellar export chaperone FliS	hit	N	Flagellar protein FliS	fliS	GO:0001539,GO:0003674,GO:0005198,GO:0006928,GO:0008150,GO:0009987,GO:0040011,GO:0048870,GO:0051179,GO:0051674,GO:0071973,GO:0097588	fliS	90371.CY43_10330	2.25e-86	254.0	COG1516@1|root,COG1516@2|Bacteria,1MZ3G@1224|Proteobacteria,1S8TQ@1236|Gammaproteobacteria,3ZM6R@590|Salmonella	1236|Gammaproteobacteria
g504	group_3154	cpxP	LTXXQ motif family protein	hit	NPTU	COG3678 P pilus assembly Cpx signaling pathway, periplasmic inhibitor zinc-resistance associated protein	-	-	group_3154	220341.16501593	2.85e-89	262.0	COG3678@1|root,COG3678@2|Bacteria,1RHGB@1224|Proteobacteria,1S685@1236|Gammaproteobacteria,3ZM5B@590|Salmonella	1236|Gammaproteobacteria
g505	gloA	gloA	lactoylglutathione lyase	hit	H	Catalyzes the conversion of hemimercaptal, formed from methylglyoxal and glutathione, to S-lactoylglutathione	gloA	GO:0003674,GO:0003824,GO:0004462,GO:0005488,GO:0005575,GO:0005622,GO:0005623,GO:0005737,GO:0005829,GO:0006081,GO:0006082,GO:0006089,GO:0006518,GO:0006575,GO:0006749,GO:0006790,GO:0006807,GO:0008150,GO:0008152,GO:0009056,GO:0009438,GO:0009987,GO:0016151,GO:0016829,GO:0016846,GO:0019243,GO:0019752,GO:0032787,GO:0034641,GO:0042180,GO:0042182,GO:0043167,GO:0043169,GO:0043436,GO:0043603,GO:0044237,GO:…	gloA	220341.16502774	3.08e-93	272.0	COG0346@1|root,COG0346@2|Bacteria,1RCYX@1224|Proteobacteria,1S1Z9@1236|Gammaproteobacteria,3ZM8S@590|Salmonella	1236|Gammaproteobacteria
g506	ptsP	ptsP;	phosphoenolpyruvate--protein phosphotransferase;Phosphoenolpyruvate-dependent phosphotransferase system	hit	T	GAF domain	ptsP	GO:0003674,GO:0003824,GO:0006464,GO:0006468,GO:0006793,GO:0006796,GO:0006807,GO:0008150,GO:0008152,GO:0008965,GO:0009987,GO:0010033,GO:0010243,GO:0016310,GO:0016740,GO:0016772,GO:0016775,GO:0019538,GO:0036211,GO:0042221,GO:0043170,GO:0043412,GO:0044237,GO:0044238,GO:0044260,GO:0044267,GO:0050896,GO:0071704,GO:1901564,GO:1901698	ptsP	220341.16504082	0.0	1421.0	COG3605@1|root,COG3605@2|Bacteria,1QTTV@1224|Proteobacteria,1T1H2@1236|Gammaproteobacteria,3ZITA@590|Salmonella	1236|Gammaproteobacteria
g507	slyD	;slyD	Peptidyl-prolyl cis-trans isomerase;peptidylprolyl isomerase	hit	G	FKBP-type peptidyl-prolyl cis-trans isomerase	slyD	GO:0000413,GO:0003674,GO:0003755,GO:0003824,GO:0005488,GO:0005507,GO:0005515,GO:0005575,GO:0005622,GO:0005623,GO:0005737,GO:0005829,GO:0006457,GO:0006464,GO:0006807,GO:0006950,GO:0008150,GO:0008152,GO:0008270,GO:0009266,GO:0009408,GO:0009628,GO:0009987,GO:0010467,GO:0016151,GO:0016853,GO:0016859,GO:0018193,GO:0018208,GO:0019538,GO:0022417,GO:0031647,GO:0035821,GO:0036211,GO:0042026,GO:0043167,GO:…	slyD	90371.CY43_17970	1.51e-125	358.0	COG1047@1|root,COG1047@2|Bacteria,1RD35@1224|Proteobacteria,1S3QR@1236|Gammaproteobacteria,3ZKRN@590|Salmonella	1236|Gammaproteobacteria
g508	sTM0270	sTM0270;	impE family protein;hypothetical protein;SciE protein;Protein of avirulence locus ImpE	hit	S	ImpE protein	impE	-	sTM0270	90371.CY43_01355	6.74e-166	474.0	COG4455@1|root,COG4455@2|Bacteria,1MWHI@1224|Proteobacteria,1RXYE@1236|Gammaproteobacteria,3ZN4R@590|Salmonella	1236|Gammaproteobacteria
g509	sTM0272	;sTM0272	ClpB protein;hypothetical protein;ATP-dependent protease Clp ATPase subunit;ClpV1 family T6SS ATPase;AAA family ATPase;ATP-dependent Clp proteinase ATP-binding chain	hit	O	AAA domain (Cdc48 subfamily)	clpV	-	sTM0272	220341.16501550	0.0	1666.0	COG0542@1|root,COG0542@2|Bacteria,1MVBH@1224|Proteobacteria,1RMZH@1236|Gammaproteobacteria,3ZJN4@590|Salmonella	1236|Gammaproteobacteria
g510	prpR	;prpR	hypothetical protein;propionate catabolism operon regulatory protein PrpR;Propionate catabolism operon regulatory protein PrpR	hit	KT	Propionate catabolism activator	prpR	GO:0003674,GO:0003700,GO:0006355,GO:0008150,GO:0009314,GO:0009628,GO:0009889,GO:0009890,GO:0009891,GO:0009892,GO:0009893,GO:0010468,GO:0010556,GO:0010557,GO:0010558,GO:0010604,GO:0010605,GO:0010628,GO:0010629,GO:0019219,GO:0019222,GO:0031323,GO:0031324,GO:0031325,GO:0031326,GO:0031327,GO:0031328,GO:0045892,GO:0045893,GO:0045934,GO:0045935,GO:0048518,GO:0048519,GO:0048522,GO:0048523,GO:0050789,GO:…	prpR	220341.16501636	0.0	1052.0	COG3829@1|root,COG3829@2|Bacteria,1NU8B@1224|Proteobacteria,1RMHY@1236|Gammaproteobacteria,3ZKSU@590|Salmonella	1236|Gammaproteobacteria
g511	motB	;motB	Chemotaxis protein MotB;flagellar motor protein MotB	hit	N	Membrane MotB of proton-channel complex MotA/MotB	motB	GO:0005575,GO:0005623,GO:0005886,GO:0005887,GO:0009288,GO:0009425,GO:0016020,GO:0016021,GO:0031224,GO:0031226,GO:0042995,GO:0043226,GO:0043228,GO:0044422,GO:0044425,GO:0044459,GO:0044461,GO:0044463,GO:0044464,GO:0071944,GO:0120100,GO:0120101	motB	90371.CY43_10140	1.17e-217	601.0	COG1360@1|root,COG1360@2|Bacteria,1MW1Y@1224|Proteobacteria,1RPQ9@1236|Gammaproteobacteria,3ZJGB@590|Salmonella	1236|Gammaproteobacteria
g512	pEBP	;pEBP	hypothetical protein;YbhB/YbcL family Raf kinase inhibitor-like protein;Putative kinase inhibitor;kinase inhibitor	hit	S	Phosphatidylethanolamine-binding protein	ybcL	GO:0005575,GO:0005623,GO:0030288,GO:0030313,GO:0031975,GO:0042597,GO:0044464	pEBP	90371.CY43_05530	8.02e-130	368.0	COG1881@1|root,COG1881@2|Bacteria,1N0Y4@1224|Proteobacteria,1S400@1236|Gammaproteobacteria,3ZMH5@590|Salmonella	1236|Gammaproteobacteria
g513	garK	garK	glycerate 2-kinase	hit	G	Glycerate kinase family	glxK	GO:0003674,GO:0003824,GO:0005975,GO:0006082,GO:0006793,GO:0006796,GO:0008150,GO:0008152,GO:0009056,GO:0009987,GO:0016052,GO:0016054,GO:0016301,GO:0016310,GO:0016491,GO:0016661,GO:0016662,GO:0016740,GO:0016772,GO:0017144,GO:0019392,GO:0019394,GO:0019577,GO:0019579,GO:0019580,GO:0019752,GO:0042737,GO:0042836,GO:0042838,GO:0043436,GO:0043648,GO:0043649,GO:0043798,GO:0044237,GO:0044238,GO:0044248,GO:…	garK	90371.CY43_16915	1.3e-264	726.0	COG1929@1|root,COG1929@2|Bacteria,1MVG9@1224|Proteobacteria,1RMC6@1236|Gammaproteobacteria,3ZM4C@590|Salmonella	1236|Gammaproteobacteria
g514	rssB	;rssB	response regulator;two-component system response regulator RssB	hit	KT	Regulates the turnover of the sigma S factor (RpoS) by promoting its proteolysis in exponentially growing cells. Acts by binding and delivering RpoS to the ClpXP protease. RssB is not co- degraded with RpoS, but is released from the complex and can initiate a new cycle of RpoS recognition and degradation	rssB	GO:0000988,GO:0000989,GO:0003674,GO:0008150,GO:0009889,GO:0009893,GO:0010556,GO:0010604,GO:0016989,GO:0019219,GO:0019222,GO:0030162,GO:0031323,GO:0031325,GO:0031326,GO:0031647,GO:0031648,GO:0032268,GO:0032270,GO:0045862,GO:0048518,GO:0048522,GO:0050789,GO:0050794,GO:0051171,GO:0051173,GO:0051246,GO:0051247,GO:0051252,GO:0060255,GO:0065007,GO:0065008,GO:0080090,GO:0140110,GO:1903506,GO:2001141	rssB	220341.16502424	5.12e-242	665.0	COG0745@1|root,COG0745@2|Bacteria,1R3UE@1224|Proteobacteria,1RRJX@1236|Gammaproteobacteria,3ZKJ7@590|Salmonella	1236|Gammaproteobacteria
g515	dppD~~~oppD	;dppD;oppD	Oligopeptide ABC transporter ATP-binding protein;Oligopeptide transport ATP-binding protein OppD;ATP-binding cassette domain-containing protein;ABC-type dipeptide/oligopeptide/nickel transport system ATPase component	hit	P	Oligopeptide/dipeptide transporter, C-terminal region	oppD	GO:0000166,GO:0003674,GO:0005488,GO:0005524,GO:0005575,GO:0005623,GO:0005886,GO:0008144,GO:0016020,GO:0017076,GO:0030554,GO:0032553,GO:0032555,GO:0032559,GO:0035639,GO:0036094,GO:0043167,GO:0043168,GO:0044464,GO:0071944,GO:0097159,GO:0097367,GO:1901265,GO:1901363	dppD~~~oppD	90371.CY43_08910	9.88e-239	656.0	COG0444@1|root,COG0444@2|Bacteria,1R4KB@1224|Proteobacteria,1SMBI@1236|Gammaproteobacteria,3ZM1U@590|Salmonella	1236|Gammaproteobacteria
g516	rplP	rplP	50S ribosomal protein L16	hit	J	Binds 23S rRNA and is also seen to make contacts with the A and possibly P site tRNAs	rplP	GO:0000027,GO:0000049,GO:0003674,GO:0003676,GO:0003723,GO:0003735,GO:0005198,GO:0005488,GO:0005575,GO:0005622,GO:0005623,GO:0005737,GO:0005829,GO:0005840,GO:0006412,GO:0006518,GO:0006807,GO:0006996,GO:0008150,GO:0008152,GO:0009058,GO:0009059,GO:0009987,GO:0010467,GO:0015934,GO:0016043,GO:0019538,GO:0019843,GO:0022607,GO:0022613,GO:0022618,GO:0022625,GO:0022626,GO:0032991,GO:0034622,GO:0034641,GO:…	rplP	1114922.CIFAM_27_00150	2.63e-90	265.0	COG0197@1|root,COG0197@2|Bacteria,1RA0Z@1224|Proteobacteria,1S201@1236|Gammaproteobacteria,3WY80@544|Citrobacter	1236|Gammaproteobacteria
g517	group_3122	;dpiA	hypothetical protein;response regulator;Transcriptional regulatory protein CitB	hit	K	Transcriptional regulator	citB	-	group_3122	90371.CY43_00255	8.68e-159	445.0	COG4565@1|root,COG4565@2|Bacteria,1P6VJ@1224|Proteobacteria,1RPI7@1236|Gammaproteobacteria,3ZMX4@590|Salmonella	1236|Gammaproteobacteria
g518	vsr	;vsr	Patch repair protein;very short patch repair endonuclease	hit	L	May nick specific sequences that contain T G mispairs resulting from m5C-deamination	vsr	GO:0003674,GO:0003676,GO:0003677,GO:0003824,GO:0004518,GO:0004519,GO:0004520,GO:0004536,GO:0005488,GO:0006139,GO:0006259,GO:0006281,GO:0006298,GO:0006725,GO:0006807,GO:0006950,GO:0006974,GO:0008150,GO:0008152,GO:0009987,GO:0016787,GO:0016788,GO:0033554,GO:0034641,GO:0043170,GO:0043765,GO:0044237,GO:0044238,GO:0044260,GO:0046483,GO:0050896,GO:0051716,GO:0071704,GO:0090304,GO:0090305,GO:0097159,GO:…	vsr	90371.CY43_10475	1.28e-78	237.0	COG3727@1|root,COG3727@2|Bacteria,1RH1C@1224|Proteobacteria,1S2V3@1236|Gammaproteobacteria,3ZJY0@590|Salmonella	1236|Gammaproteobacteria
g519	group_3119		Putative cytoplasmic protein	hit	-	-	-	-	group_3119	220341.16504233	1.16e-93	273.0	2CH4R@1|root,31P48@2|Bacteria,1RI50@1224|Proteobacteria,1S6PT@1236|Gammaproteobacteria,3ZMA4@590|Salmonella	1236|Gammaproteobacteria
g520	menI	menI	14-dihydroxy-2-naphthoyl-CoA hydrolase	hit	Q	Catalyzes the hydrolysis of 1,4-dihydroxy-2-naphthoyl- CoA (DHNA-CoA) to 1,4-dihydroxy-2-naphthoate (DHNA)	menI	GO:0003674,GO:0003824,GO:0006732,GO:0008150,GO:0008152,GO:0009058,GO:0009108,GO:0009233,GO:0009234,GO:0009987,GO:0016289,GO:0016787,GO:0016788,GO:0016790,GO:0042180,GO:0042181,GO:0044237,GO:0044249,GO:0044281,GO:0044283,GO:0051186,GO:0051188,GO:0061522,GO:0071704,GO:1901576,GO:1901661,GO:1901663	menI	90371.CY43_06950	2e-94	275.0	COG2050@1|root,COG2050@2|Bacteria,1RGVP@1224|Proteobacteria,1S5WY@1236|Gammaproteobacteria,3ZM9E@590|Salmonella	1236|Gammaproteobacteria
g521	hycH	hycH	Formate hydrogenlyase maturation protein HycH	hit	E	Formate hydrogenlyase maturation protein HycH	hycH	-	hycH	220341.16503924	2.34e-93	272.0	2DBX5@1|root,2ZBMB@2|Bacteria,1RHQ7@1224|Proteobacteria,1S6TA@1236|Gammaproteobacteria,3ZM84@590|Salmonella	1236|Gammaproteobacteria
g522	group_3108		hypothetical protein;alpha/beta hydrolase	hit	I	Alpha beta hydrolase	aes	-	group_3108	1006000.GKAS_00936	1.81e-184	516.0	COG0657@1|root,COG0657@2|Bacteria,1NEXK@1224|Proteobacteria,1RNNH@1236|Gammaproteobacteria	1236|Gammaproteobacteria
g523	treB	;treB	glucose PTS transporter subunit EIIB;Trehalose PTS enzyme II;PTS trehalose transporter subunit IIBC;hypothetical protein	hit	G	phosphotransferase system, EIIB	treB	GO:0003674,GO:0003824,GO:0005215,GO:0005575,GO:0005623,GO:0005886,GO:0006810,GO:0008150,GO:0008643,GO:0009401,GO:0015144,GO:0015766,GO:0015771,GO:0015772,GO:0016020,GO:0016740,GO:0016772,GO:0016773,GO:0022804,GO:0022857,GO:0034219,GO:0044464,GO:0051179,GO:0051234,GO:0055085,GO:0071702,GO:0071944,GO:0090563,GO:0090589	treB	220341.16505563	0.0	915.0	COG1263@1|root,COG1264@1|root,COG1263@2|Bacteria,COG1264@2|Bacteria,1MVVJ@1224|Proteobacteria,1RMYB@1236|Gammaproteobacteria,3ZJS7@590|Salmonella	1236|Gammaproteobacteria
g524	ampE	;ampE	Protein AmpE;beta-lactamase regulator AmpE	hit	V	Regulatory signalling modulator protein AmpE	ampE	GO:0005575,GO:0005623,GO:0005886,GO:0005887,GO:0016020,GO:0016021,GO:0031224,GO:0031226,GO:0044425,GO:0044459,GO:0044464,GO:0071944	ampE	220341.16501434	4.89e-202	559.0	COG3725@1|root,COG3725@2|Bacteria,1MVMK@1224|Proteobacteria,1RQTI@1236|Gammaproteobacteria,3ZJUH@590|Salmonella	1236|Gammaproteobacteria
g525	plsX	;plsX	Phosphate acyltransferase;phosphate acyltransferase PlsX	hit	I	Catalyzes the reversible formation of acyl-phosphate (acyl-PO(4)) from acyl- acyl-carrier-protein (acyl-ACP). This enzyme utilizes acyl-ACP as fatty acyl donor, but not acyl-CoA	plsX	GO:0003674,GO:0003824,GO:0005575,GO:0005622,GO:0005623,GO:0005737,GO:0006629,GO:0006644,GO:0006793,GO:0006796,GO:0008150,GO:0008152,GO:0008610,GO:0008654,GO:0009058,GO:0009987,GO:0019637,GO:0044237,GO:0044238,GO:0044249,GO:0044255,GO:0044424,GO:0044464,GO:0071704,GO:0090407,GO:1901576	plsX	220341.16502362	1.98e-243	670.0	COG0416@1|root,COG0416@2|Bacteria,1MVM3@1224|Proteobacteria,1RM7R@1236|Gammaproteobacteria,3ZJRB@590|Salmonella	1236|Gammaproteobacteria
g526	nrdE	;nrdE	Ribonucleoside-diphosphate reductase 2 subunit alpha;Ribonucleoside-diphosphate reductase;Ribonucleotide-diphosphate reductase subunit alpha;class 1b ribonucleoside-diphosphate reductase subunit alpha	hit	F	Provides the precursors necessary for DNA synthesis. Catalyzes the biosynthesis of deoxyribonucleotides from the corresponding ribonucleotides	nrdE	GO:0005575,GO:0005622,GO:0005623,GO:0005737,GO:0005829,GO:0005971,GO:0006139,GO:0006725,GO:0006753,GO:0006793,GO:0006796,GO:0006807,GO:0008150,GO:0008152,GO:0009058,GO:0009117,GO:0009165,GO:0009262,GO:0009263,GO:0009987,GO:0015949,GO:0018130,GO:0019438,GO:0019637,GO:0032991,GO:0034641,GO:0034654,GO:0044237,GO:0044238,GO:0044249,GO:0044271,GO:0044281,GO:0044424,GO:0044444,GO:0044445,GO:0044464,GO:…	nrdE	90371.CY43_14675	0.0	1406.0	COG0209@1|root,COG0209@2|Bacteria,1MUJ8@1224|Proteobacteria,1RQQ6@1236|Gammaproteobacteria,3ZKBU@590|Salmonella	1236|Gammaproteobacteria
g527	citD	citD;	citrate lyase acyl carrier protein;Citrate lyase acyl carrier protein	hit	C	Covalent carrier of the coenzyme of citrate lyase	citD	-	citD	220341.16501343	1.54e-57	179.0	COG3052@1|root,COG3052@2|Bacteria,1N20F@1224|Proteobacteria,1SC0V@1236|Gammaproteobacteria,3ZNAW@590|Salmonella	1236|Gammaproteobacteria
g528	group_3098	;mviM	Oxidoreductase;Gfo/Idh/MocA family oxidoreductase;oxidoreductase	hit	S	Oxidoreductase family, NAD-binding Rossmann fold	ygjR	-	group_3098	90371.CY43_16800	1.41e-241	663.0	COG0673@1|root,COG0673@2|Bacteria,1MZIG@1224|Proteobacteria,1RS5T@1236|Gammaproteobacteria,3ZJ9N@590|Salmonella	1236|Gammaproteobacteria
g529	vOC	vOC;	glyoxalase;VOC family protein	hit	S	Glyoxalase/Bleomycin resistance protein/Dioxygenase superfamily	-	-	vOC	220341.16501678	1.8e-83	246.0	COG3324@1|root,COG3324@2|Bacteria,1N7Q5@1224|Proteobacteria,1SCXZ@1236|Gammaproteobacteria,3ZN9M@590|Salmonella	1236|Gammaproteobacteria
g530	group_3079	;araJ	Transmembrane transport protein;putative arabinose efflux permease AraJ MFS family;MFS transporter	hit	EGP	Major Facilitator Superfamily	ygaY	-	group_3079	220341.16503894	1.56e-258	711.0	COG0477@1|root,COG2814@2|Bacteria,1MVVW@1224|Proteobacteria,1RMXR@1236|Gammaproteobacteria,3ZJU3@590|Salmonella	1236|Gammaproteobacteria
g531	mscL	mscL	large-conductance mechanosensitive channel protein MscL	hit	M	Channel that opens in response to stretch forces in the membrane lipid bilayer. May participate in the regulation of osmotic pressure changes within the cell	mscL	GO:0003674,GO:0005215,GO:0005216,GO:0005488,GO:0005515,GO:0005575,GO:0005623,GO:0005886,GO:0005887,GO:0006810,GO:0006811,GO:0006884,GO:0008150,GO:0008361,GO:0008381,GO:0009987,GO:0009992,GO:0015075,GO:0015267,GO:0015318,GO:0016020,GO:0016021,GO:0016043,GO:0019725,GO:0022803,GO:0022836,GO:0022838,GO:0022857,GO:0030104,GO:0031224,GO:0031226,GO:0032535,GO:0034220,GO:0042592,GO:0042802,GO:0044425,GO:…	mscL	220341.16505179	2.33e-89	262.0	COG1970@1|root,COG1970@2|Bacteria,1RHG8@1224|Proteobacteria,1S3PD@1236|Gammaproteobacteria,3ZM94@590|Salmonella	1236|Gammaproteobacteria
g532	group_3076	fepD	Fe(3+)-siderophore ABC transporter permease	hit	P	FecCD transport family	fepD	GO:0000041,GO:0003674,GO:0005215,GO:0005575,GO:0005623,GO:0005886,GO:0006810,GO:0006811,GO:0006812,GO:0006820,GO:0006826,GO:0008150,GO:0015343,GO:0015620,GO:0015682,GO:0015685,GO:0015688,GO:0015711,GO:0015850,GO:0015891,GO:0016020,GO:0022857,GO:0030001,GO:0042930,GO:0044464,GO:0044718,GO:0051179,GO:0051181,GO:0051184,GO:0051234,GO:0055085,GO:0071702,GO:0071944,GO:0072512,GO:1901678	group_3076	220341.16501843	1.21e-211	589.0	COG0609@1|root,COG0609@2|Bacteria,1MYYG@1224|Proteobacteria,1RRQ1@1236|Gammaproteobacteria,3ZJH3@590|Salmonella	1236|Gammaproteobacteria
g533	entH	entH	proofreading thioesterase EntH	hit	Q	Required for optimal enterobactin synthesis. Acts as a proofreading enzyme that prevents EntB misacylation by hydrolyzing the thioester bound existing between EntB and wrongly charged molecules	entH	-	entH	220341.16501850	1.92e-97	283.0	COG2050@1|root,COG2050@2|Bacteria,1RGVP@1224|Proteobacteria,1SXGM@1236|Gammaproteobacteria,3ZM7P@590|Salmonella	1236|Gammaproteobacteria
g534	fliN	fliN	flagellar motor switch protein FliN	hit	N	FliN is one of three proteins (FliG, FliN, FliM) that form the rotor-mounted switch complex (C ring), located at the base of the basal body. This complex interacts with the CheY and CheZ chemotaxis proteins, in addition to contacting components of the motor that determine the direction of flagellar rotation	fliN	GO:0005575,GO:0005623,GO:0005886,GO:0009288,GO:0009425,GO:0016020,GO:0042995,GO:0043226,GO:0043228,GO:0044422,GO:0044461,GO:0044463,GO:0044464,GO:0071944	fliN	220341.16503218	5.49e-88	259.0	COG1886@1|root,COG1886@2|Bacteria,1RGWT@1224|Proteobacteria,1S5YE@1236|Gammaproteobacteria,3ZM6D@590|Salmonella	1236|Gammaproteobacteria
g535	srlA	;srlA	hypothetical protein;Phosphotransferase system sorbitol-specific IIC component;PTS glucitol/sorbitol transporter subunit IIC	hit	G	PTS system enzyme II sorbitol-specific factor	srlA	GO:0006810,GO:0008150,GO:0008643,GO:0009401,GO:0051179,GO:0051234,GO:0071702	srlA	220341.16503909	5.19e-133	377.0	COG3730@1|root,COG3730@2|Bacteria,1MXS5@1224|Proteobacteria,1RQTZ@1236|Gammaproteobacteria,3ZJ20@590|Salmonella	1236|Gammaproteobacteria
g536	yccU	yccU	Uncharacterized protein YccU	hit	S	CoA binding domain	yccU	GO:0005575,GO:0005622,GO:0005623,GO:0005737,GO:0005829,GO:0044424,GO:0044444,GO:0044464	yccU	220341.16502253	6.15e-92	269.0	COG1832@1|root,COG1832@2|Bacteria,1N03D@1224|Proteobacteria,1S3T2@1236|Gammaproteobacteria,3ZM7T@590|Salmonella	1236|Gammaproteobacteria
g537	ibpA	ibpA	heat shock chaperone IbpA	hit	O	Associates with aggregated proteins, together with IbpB, to stabilize and protect them from irreversible denaturation and extensive proteolysis during heat shock and oxidative stress. Aggregated proteins bound to the IbpAB complex are more efficiently refolded and reactivated by the ATP-dependent chaperone systems ClpB and DnaK DnaJ GrpE. Its activity is ATP- independent	ibpA	GO:0003674,GO:0005488,GO:0005515,GO:0005575,GO:0005622,GO:0005623,GO:0005737,GO:0005829,GO:0006950,GO:0008150,GO:0009266,GO:0009408,GO:0009628,GO:0042802,GO:0044424,GO:0044444,GO:0044464,GO:0050896	ibpA	220341.16504818	2.52e-93	272.0	COG0071@1|root,COG0071@2|Bacteria,1RH2X@1224|Proteobacteria,1S6WS@1236|Gammaproteobacteria,3ZM8T@590|Salmonella	1236|Gammaproteobacteria
g538	group_3072		Membrane-bound toxin component of toxin-antitoxin system	hit	S	Membrane-bound toxin component of toxin-antitoxin system	ygfX	GO:0005575,GO:0005623,GO:0005886,GO:0005887,GO:0008150,GO:0008152,GO:0009058,GO:0009987,GO:0016020,GO:0016021,GO:0016999,GO:0017000,GO:0017144,GO:0031224,GO:0031226,GO:0032091,GO:0043393,GO:0044092,GO:0044237,GO:0044249,GO:0044425,GO:0044459,GO:0044464,GO:0051098,GO:0051100,GO:0065007,GO:0065009,GO:0071944	group_3072	90371.CY43_15880	2.62e-95	277.0	295KK@1|root,2ZSY3@2|Bacteria,1RDS7@1224|Proteobacteria,1S3W7@1236|Gammaproteobacteria,3ZMAF@590|Salmonella	1236|Gammaproteobacteria
g539	hns	hns	DNA-binding transcriptional regulator H-NS	hit	K	H-NS histone family	hns	GO:0000976,GO:0001067,GO:0001130,GO:0001217,GO:0003674,GO:0003676,GO:0003677,GO:0003681,GO:0003690,GO:0003700,GO:0005488,GO:0005515,GO:0005575,GO:0005622,GO:0005623,GO:0005737,GO:0005829,GO:0006355,GO:0008150,GO:0009889,GO:0009890,GO:0009892,GO:0010468,GO:0010556,GO:0010558,GO:0010605,GO:0010629,GO:0019219,GO:0019222,GO:0031323,GO:0031324,GO:0031326,GO:0031327,GO:0032991,GO:0032993,GO:0042802,GO:…	hns	1197719.A464_1849	1.7e-82	245.0	COG2916@1|root,COG2916@2|Bacteria,1R9YM@1224|Proteobacteria,1S24H@1236|Gammaproteobacteria,3ZM7Y@590|Salmonella	1236|Gammaproteobacteria
g540	group_3068	;flhA	Formate hydrogen-lyase transcriptional activator;formate hydrogenlyase transcriptional activator FlhA	hit	KT	GAF domain	fhlA	GO:0000976,GO:0000984,GO:0001017,GO:0001067,GO:0001150,GO:0001158,GO:0003674,GO:0003676,GO:0003677,GO:0003690,GO:0005488,GO:0005515,GO:0005575,GO:0005622,GO:0005623,GO:0005737,GO:0005829,GO:0006139,GO:0006351,GO:0006355,GO:0006725,GO:0006807,GO:0008150,GO:0008152,GO:0009058,GO:0009059,GO:0009889,GO:0009891,GO:0009893,GO:0009987,GO:0010467,GO:0010468,GO:0010556,GO:0010557,GO:0010604,GO:0010628,GO:…	group_3068	90371.CY43_14935	0.0	1346.0	COG3604@1|root,COG3604@2|Bacteria,1QTT3@1224|Proteobacteria,1T1G7@1236|Gammaproteobacteria,3ZIR0@590|Salmonella	1236|Gammaproteobacteria
g541	creC	creC	two-component system sensor histidine kinase CreC	hit	T	HAMP (Histidine kinases, Adenylyl cyclases, Methyl binding proteins, Phosphatases) domain	creC	GO:0000155,GO:0000160,GO:0003674,GO:0003824,GO:0004672,GO:0004673,GO:0005575,GO:0005623,GO:0005886,GO:0006464,GO:0006468,GO:0006793,GO:0006796,GO:0006807,GO:0007154,GO:0007165,GO:0007584,GO:0008150,GO:0008152,GO:0009605,GO:0009987,GO:0009991,GO:0016020,GO:0016301,GO:0016310,GO:0016740,GO:0016772,GO:0016773,GO:0016775,GO:0018106,GO:0018193,GO:0018202,GO:0019538,GO:0023014,GO:0023052,GO:0031667,GO:…	creC	220341.16505688	4.71e-199	561.0	COG0642@1|root,COG2205@2|Bacteria,1N17V@1224|Proteobacteria,1RPVU@1236|Gammaproteobacteria,3ZJZF@590|Salmonella	1236|Gammaproteobacteria
g542	eutM	;eutM	Ethanolamine utilization polyhedral-body-like protein EutM;ethanolamine utilization microcompartment protein EutM	hit	CQ	ethanolamine utilization protein	eutM	GO:0003674,GO:0005198,GO:0005575,GO:0005622,GO:0005623,GO:0031469,GO:0031471,GO:0043226,GO:0043228,GO:0043229,GO:0043232,GO:0044424,GO:0044464	eutM	90371.CY43_13180	2.47e-58	181.0	COG4577@1|root,COG4577@2|Bacteria,1RH1U@1224|Proteobacteria,1S6YK@1236|Gammaproteobacteria	1236|Gammaproteobacteria
g543	group_3060		Putative monooxygenase YdhR;monooxygenase	hit	S	Putative mono-oxygenase ydhR	ydhR	GO:0005575,GO:0005622,GO:0005623,GO:0005737,GO:0005829,GO:0044424,GO:0044444,GO:0044464	group_3060	220341.16505128	1.32e-63	194.0	2C948@1|root,32SAI@2|Bacteria,1MZC2@1224|Proteobacteria,1S98Z@1236|Gammaproteobacteria,3ZMF7@590|Salmonella	1236|Gammaproteobacteria
g544	ftsN	;ftsN	Cell division protein FtsN;cell division protein FtsN	hit	D	Essential cell division protein that activates septal peptidoglycan synthesis and constriction of the cell. Acts on both sides of the membrane, via interaction with FtsA in the cytoplasm and interaction with the FtsQBL complex in the periplasm. These interactions may induce a conformational switch in both FtsA and FtsQBL, leading to septal peptidoglycan synthesis by FtsI and associated synthases	ftsN	GO:0000278,GO:0000281,GO:0000910,GO:0000917,GO:0005575,GO:0005623,GO:0005886,GO:0005887,GO:0007049,GO:0008150,GO:0009987,GO:0016020,GO:0016021,GO:0016043,GO:0022402,GO:0022607,GO:0030428,GO:0031224,GO:0031226,GO:0032506,GO:0044085,GO:0044425,GO:0044459,GO:0044464,GO:0051301,GO:0061640,GO:0071840,GO:0071944,GO:0090529,GO:1902410,GO:1903047	ftsN	220341.16504646	1.98e-159	454.0	COG3087@1|root,COG3087@2|Bacteria,1PWIT@1224|Proteobacteria,1RNC1@1236|Gammaproteobacteria,3ZJHS@590|Salmonella	1236|Gammaproteobacteria
g545	group_3057		DUF3053 domain-containing protein	no-hit
g546	csrD	;csrD	Anti-FlhC(2)FlhD(4) factor YdiV;RNase E specificity factor CsrD	hit	T	Gammaproteobacterial periplasmic sensor domain	csrD	GO:0005575,GO:0005623,GO:0005886,GO:0006139,GO:0006401,GO:0006725,GO:0006807,GO:0008150,GO:0008152,GO:0009056,GO:0009057,GO:0009987,GO:0016020,GO:0016043,GO:0016070,GO:0019219,GO:0019222,GO:0019439,GO:0022607,GO:0031323,GO:0034641,GO:0034655,GO:0034660,GO:0034661,GO:0043170,GO:0043933,GO:0044085,GO:0044237,GO:0044238,GO:0044248,GO:0044260,GO:0044265,GO:0044270,GO:0044464,GO:0046483,GO:0046700,GO:…	csrD	220341.16504437	0.0	1249.0	COG2199@1|root,COG2200@1|root,COG2199@2|Bacteria,COG2200@2|Bacteria,1MUQV@1224|Proteobacteria,1RN0Q@1236|Gammaproteobacteria,3ZJMN@590|Salmonella	1236|Gammaproteobacteria
g547	fepD	fepD	iron ABC transporter permease	hit	U	FecCD transport family	yiuB	-	fepD	90371.CY43_04150	3.09e-229	634.0	COG0609@1|root,COG0609@2|Bacteria,1MV9W@1224|Proteobacteria,1RMST@1236|Gammaproteobacteria,3ZM8F@590|Salmonella	1236|Gammaproteobacteria
g548	nudC	;nudC	NAD(+) diphosphatase	hit	L	NADH pyrophosphatase zinc ribbon domain	nudC	GO:0003674,GO:0003824,GO:0004551,GO:0005488,GO:0006139,GO:0006259,GO:0006281,GO:0006725,GO:0006807,GO:0006950,GO:0006974,GO:0008150,GO:0008152,GO:0009987,GO:0016462,GO:0016787,GO:0016817,GO:0016818,GO:0030145,GO:0033554,GO:0034641,GO:0035529,GO:0043167,GO:0043169,GO:0043170,GO:0044237,GO:0044238,GO:0044260,GO:0046483,GO:0046872,GO:0046914,GO:0050896,GO:0051716,GO:0071704,GO:0090304,GO:1901360	nudC	220341.16504595	6.65e-196	542.0	COG2816@1|root,COG2816@2|Bacteria,1QGCX@1224|Proteobacteria,1RP0Y@1236|Gammaproteobacteria,3ZKRE@590|Salmonella	1236|Gammaproteobacteria
g549	nfi	;nfi	Endonuclease V;deoxyribonuclease V	hit	L	DNA repair enzyme involved in the repair of deaminated bases. Selectively cleaves double-stranded DNA at the second phosphodiester bond 3' to a deoxyinosine leaving behind the intact lesion on the nicked DNA	nfi	GO:0003674,GO:0003824,GO:0004518,GO:0004519,GO:0004520,GO:0004536,GO:0005575,GO:0005622,GO:0005623,GO:0005737,GO:0006139,GO:0006259,GO:0006725,GO:0006807,GO:0008150,GO:0008152,GO:0009987,GO:0016787,GO:0016788,GO:0016888,GO:0016893,GO:0034641,GO:0043170,GO:0043737,GO:0044237,GO:0044238,GO:0044260,GO:0044424,GO:0044464,GO:0046483,GO:0071704,GO:0090304,GO:0090305,GO:0140097,GO:1901360	nfi	220341.16504593	2.72e-164	459.0	COG1515@1|root,COG1515@2|Bacteria,1MWRN@1224|Proteobacteria,1RRYH@1236|Gammaproteobacteria,3ZK87@590|Salmonella	1236|Gammaproteobacteria
g550	tyrA	;tyrA	T-protein;hypothetical protein;bifunctional chorismate mutase/prephenate dehydrogenase	hit	E	Prephenate dehydrogenase	tyrA	GO:0000166,GO:0003674,GO:0003824,GO:0004106,GO:0005488,GO:0005575,GO:0005622,GO:0005623,GO:0005737,GO:0006082,GO:0006520,GO:0006558,GO:0006570,GO:0006571,GO:0006725,GO:0006807,GO:0008150,GO:0008152,GO:0008652,GO:0008977,GO:0009058,GO:0009072,GO:0009073,GO:0009094,GO:0009095,GO:0009987,GO:0016053,GO:0016491,GO:0016627,GO:0016628,GO:0016853,GO:0016866,GO:0017144,GO:0019438,GO:0019752,GO:0036094,GO:…	tyrA	220341.16503823	4.91e-184	522.0	COG0287@1|root,COG1605@1|root,COG0287@2|Bacteria,COG1605@2|Bacteria,1MVUT@1224|Proteobacteria,1RQB3@1236|Gammaproteobacteria,3ZK00@590|Salmonella	1236|Gammaproteobacteria
g551	flgB	flgB	flagellar basal body rod protein FlgB	hit	N	Structural component of flagellum, the bacterial motility apparatus. Part of the rod structure of flagellar basal body	flgB	GO:0001539,GO:0005575,GO:0005623,GO:0006928,GO:0008150,GO:0009288,GO:0009424,GO:0009987,GO:0040011,GO:0042995,GO:0043226,GO:0043228,GO:0044422,GO:0044461,GO:0044463,GO:0044464,GO:0048870,GO:0051179,GO:0051674,GO:0071973,GO:0071978,GO:0097588	flgB	220341.16502344	2.61e-91	267.0	COG1815@1|root,COG1815@2|Bacteria,1MZ8P@1224|Proteobacteria,1S9DS@1236|Gammaproteobacteria,3ZM96@590|Salmonella	1236|Gammaproteobacteria
g552	prmB	;prmB	HemK family protein methyltransferase;50S ribosomal protein L3 N(5)-glutamine methyltransferase	hit	J	Specifically methylates the 50S ribosomal protein L3 on 'Gln-150'	prmB	GO:0003674,GO:0003824,GO:0005575,GO:0005622,GO:0005623,GO:0005737,GO:0005829,GO:0006139,GO:0006259,GO:0006304,GO:0006305,GO:0006306,GO:0006464,GO:0006479,GO:0006725,GO:0006807,GO:0008150,GO:0008152,GO:0008168,GO:0008170,GO:0008213,GO:0008276,GO:0008757,GO:0009007,GO:0009008,GO:0009987,GO:0016740,GO:0016741,GO:0018364,GO:0019538,GO:0032259,GO:0032775,GO:0034641,GO:0036009,GO:0036211,GO:0043170,GO:…	prmB	220341.16503608	1.76e-233	641.0	COG2890@1|root,COG2890@2|Bacteria,1MX8Q@1224|Proteobacteria,1RPHQ@1236|Gammaproteobacteria,3ZIZE@590|Salmonella	1236|Gammaproteobacteria
g553	group_3037		hypothetical protein;MFS transporter;Nucleoside permease NupG	hit	U	Broad-specificity transporter of purine and pyrimidine nucleosides. Driven by a proton motive force	nupG	GO:0003674,GO:0005215,GO:0005337,GO:0005575,GO:0005623,GO:0005886,GO:0005887,GO:0006810,GO:0008150,GO:0015212,GO:0015213,GO:0015214,GO:0015858,GO:0015860,GO:0015861,GO:0015862,GO:0015864,GO:0015893,GO:0015931,GO:0015932,GO:0016020,GO:0016021,GO:0022857,GO:0031224,GO:0031226,GO:0032238,GO:0042221,GO:0042493,GO:0044425,GO:0044459,GO:0044464,GO:0050896,GO:0051179,GO:0051234,GO:0055085,GO:0071702,GO:…	group_3037	90371.CY43_16225	7.92e-298	813.0	COG2211@1|root,COG2211@2|Bacteria,1MWI9@1224|Proteobacteria,1RMU5@1236|Gammaproteobacteria,3ZJ0D@590|Salmonella	1236|Gammaproteobacteria
g554	btuB	;btuB	BtuB;Outer membrane vitamin B12 receptor BtuB;Vitamin B12 receptor protein;TonB-dependent receptor;TonB-dependent vitamin B12 receptor;TonB-dependent vitamin B12 receptor BtuB	hit	P	Involved in the active translocation of vitamin B12 (cyanocobalamin) across the outer membrane to the periplasmic space. It derives its energy for transport by interacting with the trans-periplasmic membrane protein TonB	btuB	GO:0003674,GO:0005215,GO:0005216,GO:0005488,GO:0005515,GO:0005575,GO:0006810,GO:0006811,GO:0008150,GO:0015075,GO:0015267,GO:0015318,GO:0015889,GO:0015893,GO:0016020,GO:0016021,GO:0019904,GO:0022803,GO:0022838,GO:0022857,GO:0031224,GO:0034220,GO:0042221,GO:0042493,GO:0044425,GO:0050896,GO:0051179,GO:0051180,GO:0051181,GO:0051234,GO:0055085,GO:0071702,GO:0071705	btuB	220341.16504617	0.0	1253.0	COG4206@1|root,COG4206@2|Bacteria,1MW63@1224|Proteobacteria,1RMFJ@1236|Gammaproteobacteria,3ZJ8N@590|Salmonella	1236|Gammaproteobacteria
g555	ruvX	ruvX	Holliday junction resolvase RuvX	hit	J	Could be a nuclease involved in processing of the 5'-end of pre-16S rRNA	yqgF	GO:0000966,GO:0000967,GO:0003674,GO:0003824,GO:0004518,GO:0004527,GO:0004529,GO:0004536,GO:0005575,GO:0005622,GO:0005623,GO:0005737,GO:0005829,GO:0006139,GO:0006259,GO:0006364,GO:0006396,GO:0006725,GO:0006807,GO:0008150,GO:0008152,GO:0008296,GO:0008408,GO:0009987,GO:0010467,GO:0016070,GO:0016072,GO:0016787,GO:0016788,GO:0016796,GO:0016895,GO:0022613,GO:0034470,GO:0034471,GO:0034641,GO:0034660,GO:…	ruvX	220341.16504174	2.83e-95	277.0	COG0816@1|root,COG0816@2|Bacteria,1RDHZ@1224|Proteobacteria,1S96Q@1236|Gammaproteobacteria,3ZM5H@590|Salmonella	1236|Gammaproteobacteria
g556	cueR	cueR	Cu(I)-responsive transcriptional regulator	hit	K	helix_turn_helix, mercury resistance	cueR	GO:0000976,GO:0000984,GO:0000986,GO:0000987,GO:0001017,GO:0001067,GO:0001130,GO:0001131,GO:0001199,GO:0001204,GO:0001216,GO:0003674,GO:0003676,GO:0003677,GO:0003690,GO:0003700,GO:0005488,GO:0005507,GO:0005515,GO:0005575,GO:0006139,GO:0006351,GO:0006355,GO:0006725,GO:0006807,GO:0008150,GO:0008152,GO:0009058,GO:0009059,GO:0009889,GO:0009891,GO:0009893,GO:0009987,GO:0010035,GO:0010038,GO:0010467,GO:…	cueR	220341.16501769	9.85e-96	278.0	COG0789@1|root,COG0789@2|Bacteria,1RGX6@1224|Proteobacteria,1S8ZG@1236|Gammaproteobacteria,3ZIYX@590|Salmonella	1236|Gammaproteobacteria
g557	rraB	rraB	ribonuclease E inhibitor RraB	hit	S	Globally modulates RNA abundance by binding to RNase E (Rne) and regulating its endonucleolytic activity. Can modulate Rne action in a substrate-dependent manner by altering the composition of the degradosome	rraB	GO:0003674,GO:0004857,GO:0005488,GO:0005515,GO:0005575,GO:0005622,GO:0005623,GO:0005737,GO:0005829,GO:0006139,GO:0006401,GO:0006402,GO:0006725,GO:0006807,GO:0008150,GO:0008152,GO:0008428,GO:0009056,GO:0009057,GO:0009892,GO:0009987,GO:0010468,GO:0010605,GO:0010629,GO:0016070,GO:0016071,GO:0019219,GO:0019222,GO:0019439,GO:0019899,GO:0030234,GO:0031323,GO:0031324,GO:0032069,GO:0032074,GO:0034641,GO:…	rraB	220341.16505578	6.41e-92	269.0	COG3076@1|root,COG3076@2|Bacteria,1RDKS@1224|Proteobacteria,1S4A6@1236|Gammaproteobacteria,3ZM6U@590|Salmonella	1236|Gammaproteobacteria
g558	rlpA	rlpA	endolytic peptidoglycan transglycosylase RlpA	hit	M	Lytic transglycosylase with a strong preference for naked glycan strands that lack stem peptides	rlpA	GO:0005575,GO:0005623,GO:0009279,GO:0016020,GO:0019867,GO:0030312,GO:0030313,GO:0031975,GO:0044462,GO:0044464,GO:0071944	rlpA	90371.CY43_03475	1.44e-229	637.0	COG0797@1|root,COG0797@2|Bacteria,1MZ8S@1224|Proteobacteria,1RMCG@1236|Gammaproteobacteria,3ZK90@590|Salmonella	1236|Gammaproteobacteria
g559	group_3033		cytoplasmic protein;Cytoplasmic protein;DUF4427 domain-containing protein;Putative cytoplasmic protein	hit	S	Protein of unknown function (DUF4427)	-	-	group_3033	90371.CY43_09120	8.27e-311	846.0	28JVE@1|root,2Z9KC@2|Bacteria,1R6ZM@1224|Proteobacteria,1RZXD@1236|Gammaproteobacteria,3ZM1D@590|Salmonella	1236|Gammaproteobacteria
g560	hypF	hypF;	carbamoyltransferase HypF;Hydrogenase maturation protein	hit	O	Along with HypE, it catalyzes the synthesis of the CN ligands of the active site iron of NiFe -hydrogenases using carbamoylphosphate as a substrate. It functions as a carbamoyl transferase using carbamoylphosphate as a substrate and transferring the carboxamido moiety in an ATP-dependent reaction to the thiolate of the C-terminal cysteine of HypE yielding a protein-S-carboxamide	hypF	GO:0003674,GO:0003824,GO:0005488,GO:0006464,GO:0006807,GO:0008150,GO:0008152,GO:0008270,GO:0009987,GO:0010467,GO:0016740,GO:0016741,GO:0016743,GO:0019538,GO:0036211,GO:0043167,GO:0043169,GO:0043170,GO:0043412,GO:0044237,GO:0044238,GO:0044260,GO:0044267,GO:0046872,GO:0046914,GO:0046944,GO:0051604,GO:0071704,GO:1901564	hypF	90371.CY43_14850	0.0	1420.0	COG0068@1|root,COG0068@2|Bacteria,1MVP8@1224|Proteobacteria,1RP08@1236|Gammaproteobacteria,3ZIWQ@590|Salmonella	1236|Gammaproteobacteria
g561	pepT	;pepT	Peptidase T;peptidase T;hypothetical protein;Tripeptide aminopeptidase	hit	E	Cleaves the N-terminal amino acid of tripeptides	pepT	GO:0003674,GO:0003824,GO:0004177,GO:0005575,GO:0005622,GO:0005623,GO:0005737,GO:0005829,GO:0006508,GO:0006518,GO:0006807,GO:0008150,GO:0008152,GO:0008233,GO:0008238,GO:0009987,GO:0016787,GO:0019538,GO:0034641,GO:0034701,GO:0043170,GO:0043603,GO:0044237,GO:0044238,GO:0044424,GO:0044444,GO:0044464,GO:0045148,GO:0070011,GO:0071704,GO:0140096,GO:1901564	pepT	90371.CY43_06260	1.13e-291	796.0	COG2195@1|root,COG2195@2|Bacteria,1MV7D@1224|Proteobacteria,1RMKZ@1236|Gammaproteobacteria,3ZJU1@590|Salmonella	1236|Gammaproteobacteria
g562	potB	;potB	Spermidine/putrescine transport system permease protein PotB;spermidine/putrescine ABC transporter permease PotB	hit	E	Binding-protein-dependent transport system inner membrane component	potB	GO:0003674,GO:0003824,GO:0005215,GO:0005575,GO:0005623,GO:0005886,GO:0005887,GO:0006810,GO:0006811,GO:0006812,GO:0008150,GO:0008324,GO:0008519,GO:0015075,GO:0015101,GO:0015203,GO:0015399,GO:0015405,GO:0015417,GO:0015595,GO:0015606,GO:0015695,GO:0015696,GO:0015846,GO:0015847,GO:0015848,GO:0016020,GO:0016021,GO:0016462,GO:0016787,GO:0016817,GO:0016818,GO:0016887,GO:0017111,GO:0022804,GO:0022857,GO:…	potB	220341.16502394	8.1e-182	508.0	COG1176@1|root,COG1176@2|Bacteria,1MVGM@1224|Proteobacteria,1RNNZ@1236|Gammaproteobacteria,3ZKSA@590|Salmonella	1236|Gammaproteobacteria
g563	group_3030	tcuA	FAD-dependent tricarballylate dehydrogenase TcuA	hit	C	FAD dependent oxidoreductase	cobZ	-	group_3030	220341.16501927	0.0	945.0	COG1053@1|root,COG1053@2|Bacteria,1MX5A@1224|Proteobacteria,1RN0D@1236|Gammaproteobacteria,3ZJD8@590|Salmonella	1236|Gammaproteobacteria
g564	gudD	gudD;	glucarate dehydratase;Glucarate dehydratase	hit	M	Enolase C-terminal domain-like	gudD	GO:0000287,GO:0003674,GO:0003824,GO:0005488,GO:0005975,GO:0006082,GO:0008150,GO:0008152,GO:0008872,GO:0009056,GO:0009987,GO:0016052,GO:0016054,GO:0016829,GO:0016835,GO:0016836,GO:0017144,GO:0019392,GO:0019394,GO:0019577,GO:0019579,GO:0019752,GO:0042737,GO:0042836,GO:0042838,GO:0043167,GO:0043169,GO:0043436,GO:0043648,GO:0043649,GO:0044237,GO:0044238,GO:0044248,GO:0044281,GO:0044282,GO:0046395,GO:…	gudD	90371.CY43_15445	0.0	914.0	COG4948@1|root,COG4948@2|Bacteria,1NAKW@1224|Proteobacteria,1RNE2@1236|Gammaproteobacteria,3ZKRX@590|Salmonella	1236|Gammaproteobacteria
g565	epd	epd	erythrose-4-phosphate dehydrogenase	hit	H	Catalyzes the NAD-dependent conversion of D-erythrose 4- phosphate to 4-phosphoerythronate	epd	GO:0000166,GO:0003674,GO:0003824,GO:0004365,GO:0005488,GO:0005575,GO:0005622,GO:0005623,GO:0005737,GO:0005829,GO:0005975,GO:0005996,GO:0006006,GO:0006081,GO:0006725,GO:0006732,GO:0006766,GO:0006767,GO:0006793,GO:0006796,GO:0006807,GO:0008150,GO:0008152,GO:0008614,GO:0008615,GO:0009058,GO:0009108,GO:0009110,GO:0009987,GO:0016491,GO:0016620,GO:0016903,GO:0017144,GO:0018130,GO:0019318,GO:0019438,GO:…	epd	220341.16504154	7.38e-252	691.0	COG0057@1|root,COG0057@2|Bacteria,1MU93@1224|Proteobacteria,1RMBM@1236|Gammaproteobacteria,3ZJN9@590|Salmonella	1236|Gammaproteobacteria
g566	yvrE	;yvrE	6-deoxy-6-sulfogluconolactonase;gluconolactonase	hit	G	SMP-30/Gluconolaconase/LRE-like region	yvrE	-	yvrE	220341.16503822	2.22e-232	637.0	COG3386@1|root,COG3386@2|Bacteria,1MWTR@1224|Proteobacteria,1RSKQ@1236|Gammaproteobacteria,3ZKHQ@590|Salmonella	1236|Gammaproteobacteria
g567	rodZ	;rodZ	Cytoskeleton protein RodZ;cytoskeleton protein RodZ	hit	S	Cytoskeletal protein that is involved in cell-shape control through regulation of the length of the long axis	rodZ	GO:0005575,GO:0005623,GO:0005886,GO:0005887,GO:0008150,GO:0008360,GO:0016020,GO:0016021,GO:0022603,GO:0022604,GO:0031224,GO:0031226,GO:0044425,GO:0044459,GO:0044464,GO:0050789,GO:0050793,GO:0050794,GO:0051128,GO:0065007,GO:0065008,GO:0071944	rodZ	220341.16503739	2.55e-199	556.0	COG1426@1|root,COG1426@2|Bacteria,1N240@1224|Proteobacteria,1RQMV@1236|Gammaproteobacteria,3ZM15@590|Salmonella	1236|Gammaproteobacteria
g568	flk	flk	flagella biosynthesis regulator Flk	hit	N	Acts as a regulator of flagellar gene expression by modulating the protein level of the anti sigma factor FlgM upon sensing ring completion or hook elongation. Flk could inhibit FlgM secretion by acting as a braking system for the flagellar- associated type III secretion system	flk	-	flk	220341.16503595	6.73e-224	620.0	2BXIF@1|root,2Z805@2|Bacteria,1R3XT@1224|Proteobacteria,1RRUR@1236|Gammaproteobacteria,3ZJA0@590|Salmonella	1236|Gammaproteobacteria
g569	group_3014	;uhpC	Hexuronate transporter;hypothetical protein;MFS transporter	hit	G	Major Facilitator Superfamily	-	-	group_3014	220341.16504214	4.14e-313	853.0	COG2271@1|root,COG2271@2|Bacteria,1MV04@1224|Proteobacteria,1RP70@1236|Gammaproteobacteria,3ZIT4@590|Salmonella	1236|Gammaproteobacteria
g570	group_3013		EamA domain-containing protein;hypothetical protein;Integral membrane protein;EamA family transporter	hit	EG	EamA-like transporter family	-	-	group_3013	90371.CY43_19700	4.68e-167	473.0	COG0697@1|root,COG0697@2|Bacteria,1R46X@1224|Proteobacteria,1RYTA@1236|Gammaproteobacteria,3ZKUU@590|Salmonella	1236|Gammaproteobacteria
g571	tisB	;tisB	hypothetical protein;type I toxin-antitoxin system toxin TisB	no-hit
g572	rcnR	rcnR;	Ni(II)/Co(II)-binding transcriptional repressor RcnR;hypothetical protein	hit	S	Metal-sensitive transcriptional repressor	rcnR	GO:0006355,GO:0008150,GO:0009889,GO:0009890,GO:0009892,GO:0010468,GO:0010556,GO:0010558,GO:0010605,GO:0010629,GO:0019219,GO:0019222,GO:0031323,GO:0031324,GO:0031326,GO:0031327,GO:0045892,GO:0045934,GO:0048519,GO:0048523,GO:0050789,GO:0050794,GO:0051171,GO:0051172,GO:0051252,GO:0051253,GO:0060255,GO:0065007,GO:0080090,GO:1902679,GO:1903506,GO:1903507,GO:2000112,GO:2000113,GO:2001141	rcnR	220341.16504103	5.24e-32	115.0	COG1937@1|root,COG1937@2|Bacteria,1N6ZN@1224|Proteobacteria,1S75M@1236|Gammaproteobacteria,3ZNG6@590|Salmonella	1236|Gammaproteobacteria
g573	trxC	trxC	thioredoxin TrxC	hit	O	Thioredoxin	trxC	GO:0003674,GO:0003824,GO:0004791,GO:0005488,GO:0005575,GO:0005622,GO:0005623,GO:0005737,GO:0005829,GO:0006950,GO:0006979,GO:0008150,GO:0008152,GO:0008270,GO:0009636,GO:0009987,GO:0015035,GO:0015036,GO:0016209,GO:0016491,GO:0016651,GO:0016667,GO:0016668,GO:0016671,GO:0019725,GO:0033554,GO:0034599,GO:0042221,GO:0042592,GO:0043167,GO:0043169,GO:0044424,GO:0044444,GO:0044464,GO:0045454,GO:0046872,GO:…	trxC	90371.CY43_14110	2.41e-101	293.0	COG3118@1|root,COG3118@2|Bacteria,1RHUA@1224|Proteobacteria,1S64W@1236|Gammaproteobacteria,3ZJZQ@590|Salmonella	1236|Gammaproteobacteria
g574	atpC	atpC	F0F1 ATP synthase subunit epsilon	hit	C	Produces ATP from ADP in the presence of a proton gradient across the membrane	atpC	GO:0003674,GO:0003824,GO:0005215,GO:0005575,GO:0005622,GO:0005623,GO:0005886,GO:0006139,GO:0006163,GO:0006164,GO:0006725,GO:0006753,GO:0006754,GO:0006793,GO:0006796,GO:0006807,GO:0006810,GO:0006811,GO:0006812,GO:0008150,GO:0008152,GO:0008324,GO:0009058,GO:0009117,GO:0009123,GO:0009124,GO:0009126,GO:0009127,GO:0009141,GO:0009142,GO:0009144,GO:0009145,GO:0009150,GO:0009152,GO:0009156,GO:0009161,GO:…	atpC	1218086.BBNB01000004_gene3240	2.82e-91	267.0	COG0355@1|root,COG0355@2|Bacteria,1RHE4@1224|Proteobacteria,1S25H@1236|Gammaproteobacteria,3WY8J@544|Citrobacter	1236|Gammaproteobacteria
g575	nusB	nusB	transcription antitermination factor NusB	hit	K	Involved in transcription antitermination. Required for transcription of ribosomal RNA (rRNA) genes. Binds specifically to the boxA antiterminator sequence of the ribosomal RNA (rrn) operons	nusB	GO:0005575,GO:0005622,GO:0005623,GO:0005737,GO:0005829,GO:0006139,GO:0006351,GO:0006353,GO:0006725,GO:0006807,GO:0008150,GO:0008152,GO:0009058,GO:0009059,GO:0009987,GO:0010467,GO:0016070,GO:0018130,GO:0019438,GO:0032774,GO:0034641,GO:0034645,GO:0034654,GO:0043170,GO:0044237,GO:0044238,GO:0044249,GO:0044260,GO:0044271,GO:0044424,GO:0044444,GO:0044464,GO:0046483,GO:0071704,GO:0090304,GO:0097659,GO:…	nusB	469595.CSAG_00203	1.39e-91	268.0	COG0781@1|root,COG0781@2|Bacteria,1RHFZ@1224|Proteobacteria,1S6AJ@1236|Gammaproteobacteria,3WW2H@544|Citrobacter	1236|Gammaproteobacteria
g576	iaaA	iaaA	beta-aspartyl-peptidase	hit	E	Asparaginase	iaaA	GO:0003674,GO:0003824,GO:0004067,GO:0006508,GO:0006807,GO:0008150,GO:0008152,GO:0008233,GO:0008238,GO:0008242,GO:0008798,GO:0010467,GO:0016485,GO:0016540,GO:0016787,GO:0016810,GO:0016811,GO:0019538,GO:0043170,GO:0044238,GO:0051604,GO:0070011,GO:0071704,GO:0140096,GO:1901564	iaaA	220341.16502057	1.17e-219	606.0	COG1446@1|root,COG1446@2|Bacteria,1MWFC@1224|Proteobacteria,1RNUR@1236|Gammaproteobacteria,3ZMZ7@590|Salmonella	1236|Gammaproteobacteria
g577	crl	crl;	sigma factor-binding protein Crl;Curlin genes transcriptional activator	hit	K	Binds to the sigma-S subunit of RNA polymerase, activating expression of sigma-S-regulated genes. Stimulates RNA polymerase holoenzyme formation and may bind to several other sigma factors, such as sigma-70 and sigma-32	crl	GO:0003674,GO:0003700,GO:0005575,GO:0005622,GO:0005623,GO:0005737,GO:0005829,GO:0006355,GO:0008150,GO:0009889,GO:0009891,GO:0009893,GO:0010468,GO:0010556,GO:0010557,GO:0010604,GO:0010628,GO:0019219,GO:0019222,GO:0031323,GO:0031325,GO:0031326,GO:0031328,GO:0044424,GO:0044444,GO:0044464,GO:0045893,GO:0045935,GO:0048518,GO:0048522,GO:0050789,GO:0050794,GO:0051171,GO:0051173,GO:0051252,GO:0051254,GO:…	crl	220341.16501605	7.03e-98	283.0	292QM@1|root,2ZQ8E@2|Bacteria,1N4UT@1224|Proteobacteria,1S3WH@1236|Gammaproteobacteria,3ZM5A@590|Salmonella	1236|Gammaproteobacteria
g578	group_2993	;yhjY	Outer membrane esterase;Uncharacterized conserved protein YhjY contains autotransporter beta-barrel domain	hit	IN	Autotransporter beta-domain	lip-1	-	group_2993	90371.CY43_03135	0.0	1260.0	COG3240@1|root,COG5571@1|root,COG3240@2|Bacteria,COG5571@2|Bacteria,1MWDI@1224|Proteobacteria,1SYGP@1236|Gammaproteobacteria,3ZJCG@590|Salmonella	1236|Gammaproteobacteria
g579	group_2992	;cof	HAD hydrolase family protein;5-amino-6-(5-phospho-D-ribitylamino)uracil phosphatase YbjI;HAD family hydrolase	hit	S	Sucrose-6F-phosphate phosphohydrolase	ybjI	GO:0000287,GO:0003674,GO:0003824,GO:0005488,GO:0006766,GO:0006767,GO:0006771,GO:0006793,GO:0006796,GO:0006807,GO:0008150,GO:0008152,GO:0009058,GO:0009110,GO:0009231,GO:0009987,GO:0016311,GO:0016787,GO:0016788,GO:0016791,GO:0017144,GO:0018130,GO:0034641,GO:0042364,GO:0042578,GO:0042726,GO:0042727,GO:0043167,GO:0043169,GO:0043726,GO:0044237,GO:0044249,GO:0044271,GO:0044281,GO:0044283,GO:0046483,GO:…	group_2992	90371.CY43_04645	3.56e-193	536.0	COG0561@1|root,COG0561@2|Bacteria,1Q5HK@1224|Proteobacteria,1RQ8H@1236|Gammaproteobacteria,3ZKRW@590|Salmonella	1236|Gammaproteobacteria
g580	rhaB	;rhaB	Rhamnulokinase;rhamnulokinase	hit	F	Involved in the catabolism of L-rhamnose (6-deoxy-L- mannose). Catalyzes the transfer of the gamma-phosphate group from ATP to the 1-hydroxyl group of L-rhamnulose to yield L-rhamnulose 1-phosphate	rhaB	GO:0000166,GO:0003674,GO:0003824,GO:0005488,GO:0005524,GO:0005975,GO:0005996,GO:0006793,GO:0006796,GO:0008144,GO:0008150,GO:0008152,GO:0008993,GO:0009056,GO:0009987,GO:0016052,GO:0016301,GO:0016310,GO:0016740,GO:0016772,GO:0016773,GO:0017076,GO:0019200,GO:0019299,GO:0019301,GO:0019318,GO:0019320,GO:0030554,GO:0032553,GO:0032555,GO:0032559,GO:0035639,GO:0036094,GO:0043167,GO:0043168,GO:0044237,GO:…	rhaB	220341.16504690	0.0	991.0	COG1070@1|root,COG1070@2|Bacteria,1N51F@1224|Proteobacteria,1RQX6@1236|Gammaproteobacteria,3ZIYW@590|Salmonella	1236|Gammaproteobacteria
g581	pdxY	pdxY;	pyridoxal kinase;Pyridoxamine kinase;pyridoxal kinase PdxY	hit	H	Pyridoxal kinase involved in the salvage pathway of pyridoxal 5'-phosphate (PLP). Catalyzes the phosphorylation of pyridoxal to PLP	pdxY	GO:0003674,GO:0003824,GO:0005488,GO:0005515,GO:0005575,GO:0005622,GO:0005623,GO:0005737,GO:0005829,GO:0006081,GO:0006725,GO:0006732,GO:0006766,GO:0006767,GO:0006793,GO:0006796,GO:0006807,GO:0008150,GO:0008152,GO:0008478,GO:0009058,GO:0009108,GO:0009110,GO:0009443,GO:0009987,GO:0016301,GO:0016310,GO:0016740,GO:0016772,GO:0016773,GO:0017144,GO:0018130,GO:0019438,GO:0019637,GO:0034641,GO:0042364,GO:…	pdxY	90371.CY43_07380	8.8e-204	564.0	COG2240@1|root,COG2240@2|Bacteria,1MVC9@1224|Proteobacteria,1RMIE@1236|Gammaproteobacteria,3ZIZG@590|Salmonella	1236|Gammaproteobacteria
g582	bioB	;bioB	Biotin synthase;Biotin synthetase;biotin synthase BioB	hit	H	Catalyzes the conversion of dethiobiotin (DTB) to biotin by the insertion of a sulfur atom into dethiobiotin via a radical- based mechanism	bioB	GO:0003674,GO:0003824,GO:0004076,GO:0005488,GO:0006082,GO:0006732,GO:0006766,GO:0006767,GO:0006768,GO:0006790,GO:0006807,GO:0008150,GO:0008152,GO:0009058,GO:0009102,GO:0009108,GO:0009110,GO:0009987,GO:0016053,GO:0016740,GO:0016782,GO:0016783,GO:0017144,GO:0018130,GO:0019752,GO:0032787,GO:0034641,GO:0042364,GO:0043436,GO:0043603,GO:0043604,GO:0044237,GO:0044249,GO:0044271,GO:0044272,GO:0044281,GO:…	bioB	220341.16502012	6.58e-254	696.0	COG0502@1|root,COG0502@2|Bacteria,1MVFF@1224|Proteobacteria,1RMEQ@1236|Gammaproteobacteria,3ZJ21@590|Salmonella	1236|Gammaproteobacteria
g583	tolA	tolA;	cell envelope integrity protein TolA;TolA family protein;hypothetical protein	hit	M	TolA C-terminal	tolA	GO:0003674,GO:0005488,GO:0005515,GO:0005575,GO:0005623,GO:0005886,GO:0005887,GO:0006810,GO:0008104,GO:0008150,GO:0009719,GO:0009987,GO:0010033,GO:0010243,GO:0015031,GO:0015833,GO:0015893,GO:0016020,GO:0016021,GO:0016032,GO:0017038,GO:0019058,GO:0019904,GO:0030260,GO:0031224,GO:0031226,GO:0032153,GO:0033036,GO:0042221,GO:0042493,GO:0042886,GO:0042891,GO:0043213,GO:0044403,GO:0044409,GO:0044419,GO:…	tolA	90371.CY43_04035	2.78e-80	259.0	COG3064@1|root,COG3064@2|Bacteria,1MVQS@1224|Proteobacteria,1RP2V@1236|Gammaproteobacteria,3ZKI8@590|Salmonella	1236|Gammaproteobacteria
g584	yfeJ	;yfeJ	glutamine amidotransferase;hypothetical protein;Putative glutamine amidotransferase-like protein YfeJ	hit	F	Glutamine amidotransferase class-I	guaA_2	-	yfeJ	220341.16503655	4.86e-175	487.0	COG0518@1|root,COG0518@2|Bacteria,1MUDH@1224|Proteobacteria,1RXUZ@1236|Gammaproteobacteria,3ZK97@590|Salmonella	1236|Gammaproteobacteria
g585	pdxK	;pdxK	hypothetical protein;pyridoxine/pyridoxal/pyridoxamine kinase;bifunctional hydroxymethylpyrimidine kinase/phosphomethylpyrimidine kinase;Pyridoxal kinase	hit	H	B6-vitamer kinase involved in the salvage pathway of pyridoxal 5'-phosphate (PLP). Catalyzes the phosphorylation of pyridoxine (PN), pyridoxal (PL), and pyridoxamine (PM), forming their respective 5'-phosphorylated esters, i.e. PNP, PLP and PMP	pdxK	GO:0003674,GO:0003824,GO:0005488,GO:0005575,GO:0005622,GO:0005623,GO:0005737,GO:0005829,GO:0006081,GO:0006725,GO:0006732,GO:0006766,GO:0006767,GO:0006793,GO:0006796,GO:0006807,GO:0008144,GO:0008150,GO:0008152,GO:0008478,GO:0008614,GO:0008615,GO:0008902,GO:0009058,GO:0009108,GO:0009110,GO:0009443,GO:0009987,GO:0016301,GO:0016310,GO:0016740,GO:0016772,GO:0016773,GO:0017144,GO:0018130,GO:0019438,GO:…	pdxK	90371.CY43_13030	5.94e-201	557.0	COG2240@1|root,COG2240@2|Bacteria,1MVC9@1224|Proteobacteria,1RMIE@1236|Gammaproteobacteria,3ZM26@590|Salmonella	1236|Gammaproteobacteria
g586	rhlB	;rhlB	hypothetical protein;ATP-dependent RNA helicase RhlB	hit	F	DEAD-box RNA helicase involved in RNA degradation. Has RNA-dependent ATPase activity and unwinds double-stranded RNA	rhlB	GO:0003674,GO:0003724,GO:0003824,GO:0004004,GO:0004386,GO:0005488,GO:0005515,GO:0005575,GO:0005622,GO:0005623,GO:0005737,GO:0005829,GO:0006139,GO:0006401,GO:0006725,GO:0006807,GO:0008026,GO:0008150,GO:0008152,GO:0008186,GO:0009056,GO:0009057,GO:0009987,GO:0010501,GO:0016070,GO:0016462,GO:0016787,GO:0016817,GO:0016818,GO:0016887,GO:0017111,GO:0019439,GO:0019904,GO:0034641,GO:0034655,GO:0042623,GO:…	rhlB	220341.16504519	9.25e-308	838.0	COG0513@1|root,COG0513@2|Bacteria,1MU49@1224|Proteobacteria,1RMWA@1236|Gammaproteobacteria,3ZJ30@590|Salmonella	1236|Gammaproteobacteria
g587	cadA	;cadA	hypothetical protein;lysine decarboxylase CadA	hit	E	Orn/Lys/Arg decarboxylase, C-terminal domain	cadA	GO:0000166,GO:0001882,GO:0001883,GO:0003674,GO:0003824,GO:0005488,GO:0005515,GO:0006082,GO:0006520,GO:0006553,GO:0006554,GO:0006807,GO:0008150,GO:0008152,GO:0008923,GO:0009056,GO:0009063,GO:0009066,GO:0009068,GO:0009987,GO:0016054,GO:0016829,GO:0016830,GO:0016831,GO:0017076,GO:0019001,GO:0019752,GO:0032549,GO:0032550,GO:0032553,GO:0032555,GO:0032561,GO:0036094,GO:0042802,GO:0043167,GO:0043168,GO:…	cadA	220341.16503772	0.0	1458.0	COG1982@1|root,COG1982@2|Bacteria,1MWK4@1224|Proteobacteria,1RMVF@1236|Gammaproteobacteria,3ZJDR@590|Salmonella	1236|Gammaproteobacteria
g588	group_2980		DUF1496 domain-containing protein	hit	S	Protein of unknown function (DUF1496)	ynjH	-	group_2980	220341.16502891	1.81e-54	171.0	2E3JA@1|root,32YHQ@2|Bacteria,1NB7M@1224|Proteobacteria,1SCHX@1236|Gammaproteobacteria,3ZMK1@590|Salmonella	1236|Gammaproteobacteria
g589	xni	xni;	flap endonuclease Xni;Flap endonuclease Xni	hit	L	Has flap endonuclease activity. During DNA replication, flap endonucleases cleave the 5'-overhanging flap structure that is generated by displacement synthesis when DNA polymerase encounters the 5'-end of a downstream Okazaki fragment	xni	GO:0000287,GO:0003674,GO:0003676,GO:0003677,GO:0003824,GO:0004518,GO:0004519,GO:0004520,GO:0004527,GO:0004536,GO:0005488,GO:0006139,GO:0006259,GO:0006260,GO:0006261,GO:0006271,GO:0006273,GO:0006281,GO:0006308,GO:0006725,GO:0006807,GO:0006950,GO:0006974,GO:0008150,GO:0008152,GO:0009056,GO:0009057,GO:0009058,GO:0009059,GO:0009987,GO:0016070,GO:0016787,GO:0016788,GO:0016888,GO:0016893,GO:0017108,GO:…	xni	90371.CY43_15505	1.24e-183	510.0	COG0258@1|root,COG0258@2|Bacteria,1MX9Y@1224|Proteobacteria,1RQZE@1236|Gammaproteobacteria,3ZJFU@590|Salmonella	1236|Gammaproteobacteria
g590	pstS	;pstS	Phosphate ABC transporter substrate-binding protein;phosphate ABC transporter substrate-binding protein PstS	hit	P	Part of the ABC transporter complex PstSACB involved in phosphate import	pstS	GO:0003674,GO:0005488,GO:0005575,GO:0005623,GO:0006810,GO:0006811,GO:0006817,GO:0006820,GO:0006950,GO:0006974,GO:0008150,GO:0009314,GO:0009628,GO:0009987,GO:0010921,GO:0015698,GO:0019220,GO:0019222,GO:0030288,GO:0030313,GO:0031323,GO:0031975,GO:0033554,GO:0035303,GO:0042301,GO:0042597,GO:0043167,GO:0043168,GO:0044464,GO:0050789,GO:0050790,GO:0050794,GO:0050896,GO:0051174,GO:0051179,GO:0051234,GO:…	pstS	220341.16504777	1.94e-246	677.0	COG0226@1|root,COG0226@2|Bacteria,1MUAZ@1224|Proteobacteria,1RN5Q@1236|Gammaproteobacteria,3ZITN@590|Salmonella	1236|Gammaproteobacteria
g591	group_2964	;potE	hypothetical protein;amino acid transporter;Putative amino acid transporter;APC family permease	hit	E	Amino acid permease	-	-	group_2964	90371.CY43_12625	0.0	940.0	COG0531@1|root,COG0531@2|Bacteria,1MUP1@1224|Proteobacteria,1RR0V@1236|Gammaproteobacteria,3ZN74@590|Salmonella	1236|Gammaproteobacteria
g592	group_2962		hypothetical protein;DKNYY domain-containing protein	hit	-	-	-	-	group_2962	220341.16505524	1.37e-202	570.0	28M3A@1|root,33SJV@2|Bacteria,1NRBF@1224|Proteobacteria,1SKKS@1236|Gammaproteobacteria	1236|Gammaproteobacteria
g593	group_2960		hypothetical protein	no-hit
g594	lpp	;lpp	Major outer membrane lipoprotein Lpp 2;murein lipoprotein Lpp	hit	M	major outer membrane lipoprotein	lpp	GO:0003674,GO:0005488,GO:0005515,GO:0005539,GO:0005575,GO:0005623,GO:0006629,GO:0008150,GO:0008152,GO:0008289,GO:0009279,GO:0009987,GO:0016020,GO:0016021,GO:0019867,GO:0030258,GO:0030312,GO:0030313,GO:0031224,GO:0031230,GO:0031975,GO:0042802,GO:0042834,GO:0044237,GO:0044238,GO:0044255,GO:0044425,GO:0044462,GO:0044464,GO:0045203,GO:0071704,GO:0071944,GO:0097367	lpp	1005994.GTGU_00444	2.55e-18	80.9	COG4238@1|root,COG4238@2|Bacteria,1MZCW@1224|Proteobacteria,1S8YB@1236|Gammaproteobacteria	1236|Gammaproteobacteria
g595	aceF	aceF	pyruvate dehydrogenase complex dihydrolipoyllysine-residue acetyltransferase	hit	C	The pyruvate dehydrogenase complex catalyzes the overall conversion of pyruvate to acetyl-CoA and CO(2)	aceF	GO:0003674,GO:0003824,GO:0004742,GO:0005488,GO:0005504,GO:0005575,GO:0005622,GO:0005623,GO:0005737,GO:0006082,GO:0006084,GO:0006085,GO:0006086,GO:0006090,GO:0006139,GO:0006163,GO:0006164,GO:0006637,GO:0006725,GO:0006732,GO:0006753,GO:0006790,GO:0006793,GO:0006796,GO:0006807,GO:0008150,GO:0008152,GO:0008289,GO:0009058,GO:0009108,GO:0009117,GO:0009150,GO:0009152,GO:0009165,GO:0009259,GO:0009260,GO:…	aceF	1218086.BBNB01000010_gene706	0.0	1041.0	COG0508@1|root,COG0508@2|Bacteria,1MU7K@1224|Proteobacteria,1RNPT@1236|Gammaproteobacteria,3WWKR@544|Citrobacter	1236|Gammaproteobacteria
g596	yedD	;yedD	lipoprotein	hit	S	YedD-like protein	yedD	-	yedD	220341.16503205	8.26e-90	264.0	2C08M@1|root,2ZQUD@2|Bacteria,1RDMY@1224|Proteobacteria,1S41Z@1236|Gammaproteobacteria,3ZM6Z@590|Salmonella	1236|Gammaproteobacteria
g597	nanE	nanE	Putative N-acetylmannosamine-6-phosphate 2-epimerase	hit	G	Converts N-acetylmannosamine-6-phosphate (ManNAc-6-P) to N-acetylglucosamine-6-phosphate (GlcNAc-6-P)	nanE	GO:0003674,GO:0003824,GO:0005575,GO:0005622,GO:0005623,GO:0005737,GO:0005829,GO:0006040,GO:0006050,GO:0006051,GO:0006053,GO:0006054,GO:0006082,GO:0008150,GO:0008152,GO:0009056,GO:0009987,GO:0016054,GO:0016853,GO:0016854,GO:0016857,GO:0016999,GO:0017001,GO:0017144,GO:0019262,GO:0019752,GO:0042737,GO:0043436,GO:0044237,GO:0044248,GO:0044281,GO:0044282,GO:0044424,GO:0044444,GO:0044464,GO:0046346,GO:…	nanE	90371.CY43_17380	7.39e-156	438.0	COG3010@1|root,COG3010@2|Bacteria,1PRVW@1224|Proteobacteria,1RS59@1236|Gammaproteobacteria,3ZJMC@590|Salmonella	1236|Gammaproteobacteria
g598	group_2953	;gstA	Glutathione S-transferase;glutathione transferase GstA	hit	O	Glutathione S-transferase, C-terminal domain	gst	GO:0000302,GO:0003674,GO:0003824,GO:0004364,GO:0005575,GO:0005622,GO:0005623,GO:0005737,GO:0006950,GO:0006979,GO:0008150,GO:0009636,GO:0010035,GO:0016740,GO:0016765,GO:0042221,GO:0042493,GO:0042542,GO:0044424,GO:0044464,GO:0046677,GO:0050896,GO:1901700	group_2953	90371.CY43_07385	2.63e-142	401.0	COG0625@1|root,COG0625@2|Bacteria,1MY47@1224|Proteobacteria,1RRI3@1236|Gammaproteobacteria,3ZKX5@590|Salmonella	1236|Gammaproteobacteria
g599	group_2950	;norV	hypothetical protein;anaerobic nitric oxide reductase flavorubredoxin;rubredoxin;Flavoprotein	hit	C	uses NADH to detoxify nitric oxide (NO), protecting several 4Fe-4S NO-sensitive enzymes. Has at least 2 reductase partners, only one of which (NorW, flavorubredoxin reductase) has been identified. NO probably binds to the di-iron center	norV	GO:0000166,GO:0000302,GO:0001505,GO:0003674,GO:0003824,GO:0005488,GO:0005506,GO:0005515,GO:0005575,GO:0005622,GO:0005623,GO:0005737,GO:0006091,GO:0006807,GO:0006950,GO:0006979,GO:0008150,GO:0008152,GO:0009055,GO:0009056,GO:0009987,GO:0010035,GO:0010181,GO:0016043,GO:0016491,GO:0016661,GO:0017144,GO:0022607,GO:0022900,GO:0032553,GO:0034641,GO:0036094,GO:0042133,GO:0042135,GO:0042221,GO:0042493,GO:…	group_2950	220341.16503918	0.0	975.0	COG0426@1|root,COG1773@1|root,COG0426@2|Bacteria,COG1773@2|Bacteria,1N731@1224|Proteobacteria,1SC8Q@1236|Gammaproteobacteria,3ZIXI@590|Salmonella	1236|Gammaproteobacteria
g600	flgN	flgN	flagella biosynthesis chaperone FlgN	hit	N	FlgN protein	flgN	-	flgN	220341.16502341	3.03e-91	267.0	COG3418@1|root,COG3418@2|Bacteria,1MZUY@1224|Proteobacteria,1SAU2@1236|Gammaproteobacteria,3ZM58@590|Salmonella	1236|Gammaproteobacteria
g601	group_2947	nudF	ADP-ribose diphosphatase	hit	S	Protein of unknown function (DUF1249)	yqiB	-	group_2947	90371.CY43_16595	3.55e-99	287.0	COG3151@1|root,COG3151@2|Bacteria,1RA4E@1224|Proteobacteria,1S55I@1236|Gammaproteobacteria,3ZKB7@590|Salmonella	1236|Gammaproteobacteria
g602	group_2946	pspE	Rhodanese-related sulfurtransferase;rhodanese-like domain-containing protein	hit	P	Rhodanese-like domain	yibN	GO:0005575,GO:0005622,GO:0005623,GO:0005737,GO:0005829,GO:0044424,GO:0044444,GO:0044464	group_2946	220341.16504912	5e-96	280.0	COG0607@1|root,COG0607@2|Bacteria,1MZ83@1224|Proteobacteria,1S8ZI@1236|Gammaproteobacteria,3ZKAP@590|Salmonella	1236|Gammaproteobacteria
g603	group_2945		hypothetical protein;cytoplasmic protein	hit	S	Phage derived protein Gp49-like (DUF891)	-	-	group_2945	220341.16504529	5.19e-78	232.0	COG4679@1|root,COG4679@2|Bacteria,1MZC9@1224|Proteobacteria,1S8WB@1236|Gammaproteobacteria,3ZNA1@590|Salmonella	1236|Gammaproteobacteria
g604	group_2941	;torD	hypothetical protein;molecular chaperone	hit	S	Nitrate reductase delta subunit	-	-	group_2941	90371.CY43_03335	2.46e-126	360.0	COG3381@1|root,COG3381@2|Bacteria,1N3NW@1224|Proteobacteria,1SAN3@1236|Gammaproteobacteria,3ZMBN@590|Salmonella	1236|Gammaproteobacteria
g605	zraP	zraP	zinc resistance sensor/chaperone ZraP	hit	NPTU	Heavy-metal resistance	zraP	GO:0003674,GO:0005488,GO:0005507,GO:0005575,GO:0005623,GO:0008270,GO:0016151,GO:0030288,GO:0030313,GO:0031975,GO:0042597,GO:0043167,GO:0043169,GO:0044464,GO:0046872,GO:0046914,GO:0050897	zraP	90371.CY43_21780	5.06e-93	273.0	COG3678@1|root,COG3678@2|Bacteria,1RI83@1224|Proteobacteria,1S6TF@1236|Gammaproteobacteria,3ZM8N@590|Salmonella	1236|Gammaproteobacteria
g606	group_2932		DUF1471 domain-containing protein;Uncharacterized protein YjfN	hit	S	Protein of unknown function (DUF1471)	yjfN	-	group_2932	90371.CY43_22825	2.27e-54	170.0	2DMK5@1|root,32S43@2|Bacteria,1N2WZ@1224|Proteobacteria,1S96B@1236|Gammaproteobacteria,3ZMEU@590|Salmonella	1236|Gammaproteobacteria
g607	flgJ	flgJ	flagellar assembly peptidoglycan hydrolase FlgJ	hit	N	Lysozyme subfamily 2	flgJ	GO:0001539,GO:0006928,GO:0008150,GO:0009987,GO:0040011,GO:0048870,GO:0051179,GO:0051674,GO:0071973,GO:0097588	flgJ	90371.CY43_06025	2.01e-217	601.0	COG1705@1|root,COG3951@1|root,COG1705@2|Bacteria,COG3951@2|Bacteria,1MX2W@1224|Proteobacteria,1RPGY@1236|Gammaproteobacteria,3ZKFJ@590|Salmonella	1236|Gammaproteobacteria
g608	cyoB	;cyoB	Ubiquinol oxidase subunit 1;cbb3-type cytochrome c oxidase subunit I;cytochrome o ubiquinol oxidase subunit I;Cytochrome O ubiquinol oxidase subunit I;Cytochrome o ubiquinol oxidase subunit I	hit	C	Cytochrome C and Quinol oxidase polypeptide I	cyoB	GO:0003674,GO:0003824,GO:0005215,GO:0005488,GO:0005507,GO:0005575,GO:0005623,GO:0005886,GO:0005887,GO:0006091,GO:0006810,GO:0006811,GO:0006812,GO:0008150,GO:0008152,GO:0008324,GO:0009055,GO:0009060,GO:0009319,GO:0009486,GO:0009987,GO:0015002,GO:0015075,GO:0015077,GO:0015078,GO:0015318,GO:0015399,GO:0015453,GO:0015672,GO:0015980,GO:0015988,GO:0015990,GO:0016020,GO:0016021,GO:0016491,GO:0019646,GO:…	cyoB	220341.16501713	0.0	1331.0	COG0843@1|root,COG0843@2|Bacteria,1MU7S@1224|Proteobacteria,1RPC3@1236|Gammaproteobacteria,3ZKHH@590|Salmonella	1236|Gammaproteobacteria
g609	cheR	;cheR	Chemotaxis protein methyltransferase;protein-glutamate O-methyltransferase CheR	hit	H	Methylation of the membrane-bound methyl-accepting chemotaxis proteins (MCP) to form gamma-glutamyl methyl ester residues in MCP	cheR	GO:0003674,GO:0003824,GO:0005488,GO:0005515,GO:0005575,GO:0005622,GO:0005623,GO:0005737,GO:0005829,GO:0005886,GO:0006464,GO:0006479,GO:0006807,GO:0006935,GO:0008022,GO:0008150,GO:0008152,GO:0008168,GO:0008171,GO:0008213,GO:0008276,GO:0008757,GO:0008983,GO:0009605,GO:0009987,GO:0010340,GO:0016020,GO:0016740,GO:0016741,GO:0019538,GO:0032259,GO:0032991,GO:0036211,GO:0040011,GO:0042221,GO:0042330,GO:…	cheR	90371.CY43_10115	1.78e-206	571.0	COG1352@1|root,COG1352@2|Bacteria,1MU6W@1224|Proteobacteria,1RMFK@1236|Gammaproteobacteria,3ZKHK@590|Salmonella	1236|Gammaproteobacteria
g610	group_2924	araC	arabinose operon transcriptional regulator AraC	hit	K	AraC-like ligand binding domain	araC	GO:0000976,GO:0001067,GO:0001130,GO:0001216,GO:0001217,GO:0003674,GO:0003676,GO:0003677,GO:0003690,GO:0003700,GO:0005488,GO:0005515,GO:0005575,GO:0005622,GO:0005623,GO:0005737,GO:0005829,GO:0005975,GO:0005996,GO:0006355,GO:0008150,GO:0008152,GO:0009056,GO:0009889,GO:0009890,GO:0009891,GO:0009892,GO:0009893,GO:0010468,GO:0010556,GO:0010557,GO:0010558,GO:0010604,GO:0010605,GO:0010628,GO:0010629,GO:…	group_2924	90371.CY43_00510	7.04e-214	589.0	COG4977@1|root,COG4977@2|Bacteria,1MVS8@1224|Proteobacteria,1RQ3Y@1236|Gammaproteobacteria,3ZJ3X@590|Salmonella	1236|Gammaproteobacteria
g611	epmA	;epmA	Elongation factor P lysine(34) lysyltransferase;elongation factor P--(R)-beta-lysine ligase	hit	J	With EpmB is involved in the beta-lysylation step of the post-translational modification of translation elongation factor P (EF-P) on 'Lys-34'. Catalyzes the ATP-dependent activation of (R)- beta-lysine produced by EpmB, forming a lysyl-adenylate, from which the beta-lysyl moiety is then transferred to the epsilon- amino group of EF-P 'Lys-34'	epmA	GO:0003674,GO:0003824,GO:0005575,GO:0005622,GO:0005623,GO:0005737,GO:0005829,GO:0006082,GO:0006139,GO:0006399,GO:0006412,GO:0006418,GO:0006430,GO:0006464,GO:0006518,GO:0006520,GO:0006725,GO:0006807,GO:0008150,GO:0008152,GO:0009058,GO:0009059,GO:0009987,GO:0010467,GO:0016070,GO:0016740,GO:0016746,GO:0016755,GO:0018193,GO:0018205,GO:0019538,GO:0019752,GO:0034641,GO:0034645,GO:0034660,GO:0036211,GO:…	epmA	90371.CY43_22655	2.07e-235	647.0	COG2269@1|root,COG2269@2|Bacteria,1MU97@1224|Proteobacteria,1RMR9@1236|Gammaproteobacteria,3ZJDG@590|Salmonella	1236|Gammaproteobacteria
g612	queD	;queD	6-carboxy-5678-tetrahydropterin synthase;6-carboxytetrahydropterin synthase QueD	hit	H	6-pyruvoyl tetrahydropterin synthase	queD	GO:0003674,GO:0003824,GO:0005488,GO:0005515,GO:0006139,GO:0006725,GO:0006807,GO:0008150,GO:0008152,GO:0008270,GO:0008616,GO:0009058,GO:0009116,GO:0009119,GO:0009163,GO:0009987,GO:0016829,GO:0016835,GO:0016836,GO:0018130,GO:0019438,GO:0034404,GO:0034641,GO:0034654,GO:0042455,GO:0042802,GO:0043167,GO:0043169,GO:0044237,GO:0044238,GO:0044249,GO:0044271,GO:0044281,GO:0044283,GO:0046116,GO:0046483,GO:…	queD	220341.16504022	8.96e-79	234.0	COG0720@1|root,COG0720@2|Bacteria,1RI4P@1224|Proteobacteria,1S3T6@1236|Gammaproteobacteria,3ZM5T@590|Salmonella	1236|Gammaproteobacteria
g613	group_2908	;tar	Methyl-accepting chemotaxis protein;hypothetical protein;chemotaxis protein	hit	NT	Chemoreceptor zinc-binding domain	-	-	group_2908	220341.16504218	7.93e-205	572.0	COG0840@1|root,COG0840@2|Bacteria,1R5W9@1224|Proteobacteria,1RZUT@1236|Gammaproteobacteria,3ZJ9G@590|Salmonella	1236|Gammaproteobacteria
g614	tlyC~~~yoaE	tlyC;;yoaE	Hemolysin-related protein contains CBS domains UPF0053 family;Magnesium and cobalt efflux protein CorC;Putative membrane protein;CNNM family cation transport protein YoaE	hit	P	Transporter associated domain	yoaE	GO:0005575,GO:0005623,GO:0005886,GO:0016020,GO:0044464,GO:0071944	tlyC~~~yoaE	90371.CY43_09335	0.0	966.0	COG1253@1|root,COG1253@2|Bacteria,1QTUN@1224|Proteobacteria,1RMTY@1236|Gammaproteobacteria,3ZISZ@590|Salmonella	1236|Gammaproteobacteria
g615	trpR	trpR	trp operon repressor	hit	K	This protein is an aporepressor. When complexed with L- tryptophan it binds the operator region of the trp operon (5'- ACTAGT-'3') and prevents the initiation of transcription. The complex also regulates trp repressor biosynthesis by binding to its regulatory region	trpR	GO:0003674,GO:0003676,GO:0003677,GO:0003700,GO:0005488,GO:0005575,GO:0005622,GO:0005623,GO:0005737,GO:0006082,GO:0006355,GO:0006520,GO:0006568,GO:0006576,GO:0006586,GO:0006725,GO:0006807,GO:0008150,GO:0008152,GO:0009072,GO:0009308,GO:0009889,GO:0009987,GO:0010468,GO:0010556,GO:0019219,GO:0019222,GO:0019752,GO:0031323,GO:0031326,GO:0034641,GO:0042430,GO:0043436,GO:0043565,GO:0044106,GO:0044237,GO:…	trpR	220341.16505683	7.51e-66	201.0	COG2973@1|root,COG2973@2|Bacteria,1MYB2@1224|Proteobacteria,1S6RH@1236|Gammaproteobacteria,3ZMC8@590|Salmonella	1236|Gammaproteobacteria
g616	nsrR	nsrR	nitric oxide-sensing transcriptional repressor NsrR	hit	K	Nitric oxide-sensitive repressor of genes involved in protecting the cell against nitrosative stress. May require iron for activity	nsrR	GO:0000976,GO:0001067,GO:0001130,GO:0001217,GO:0003674,GO:0003676,GO:0003677,GO:0003690,GO:0003700,GO:0005488,GO:0005575,GO:0006355,GO:0008150,GO:0009889,GO:0009890,GO:0009892,GO:0010468,GO:0010556,GO:0010558,GO:0010605,GO:0010629,GO:0019219,GO:0019222,GO:0031323,GO:0031324,GO:0031326,GO:0031327,GO:0032991,GO:0032993,GO:0043565,GO:0044212,GO:0045892,GO:0045934,GO:0048519,GO:0048523,GO:0050789,GO:…	nsrR	90371.CY43_22770	1.44e-94	276.0	COG1959@1|root,COG1959@2|Bacteria,1N05H@1224|Proteobacteria,1S8SJ@1236|Gammaproteobacteria,3ZK63@590|Salmonella	1236|Gammaproteobacteria
g617	exbD	exbD	TonB system transport protein ExbD	hit	U	Biopolymer transport protein ExbD/TolR	exbD	GO:0003674,GO:0005488,GO:0005515,GO:0005575,GO:0005623,GO:0005886,GO:0005887,GO:0007154,GO:0007165,GO:0008150,GO:0009987,GO:0016020,GO:0016021,GO:0023052,GO:0031224,GO:0031226,GO:0031647,GO:0031992,GO:0032991,GO:0042802,GO:0044425,GO:0044459,GO:0044464,GO:0050789,GO:0050794,GO:0050821,GO:0050896,GO:0051716,GO:0060089,GO:0065007,GO:0065008,GO:0071944,GO:0098796,GO:0098797	exbD	220341.16504236	1.14e-91	268.0	COG0848@1|root,COG0848@2|Bacteria,1MZ6M@1224|Proteobacteria,1S82I@1236|Gammaproteobacteria,3ZM5S@590|Salmonella	1236|Gammaproteobacteria
g618	group_2896	;araJ	Metabolite transport protein;MFS transporter	hit	P	Sugar (and other) transporter	jen	-	group_2896	220341.16501626	3.33e-297	811.0	COG0477@1|root,COG2814@2|Bacteria,1MWKH@1224|Proteobacteria,1RS23@1236|Gammaproteobacteria,3ZK0I@590|Salmonella	1236|Gammaproteobacteria
g619	ypeA	ypeA	GNAT family acetyltransferase	hit	K	Acetyltransferase (GNAT) domain	ypeA	-	ypeA	220341.16503666	4.65e-100	290.0	COG0454@1|root,COG0456@2|Bacteria,1RA6D@1224|Proteobacteria,1S2F2@1236|Gammaproteobacteria,3ZJD1@590|Salmonella	1236|Gammaproteobacteria
g620	bcsC	bcsC	Cellulose synthase operon protein C	hit	O	TPR repeat	bcsC	-	bcsC	90371.CY43_18765	0.0	2160.0	COG0457@1|root,COG3118@1|root,COG0457@2|Bacteria,COG3118@2|Bacteria,1MVB8@1224|Proteobacteria,1RPSN@1236|Gammaproteobacteria,3ZKA1@590|Salmonella	1236|Gammaproteobacteria
g621	ygaA	ygaA	SNARE associated Golgi protein	hit	S	SNARE associated Golgi protein	yqaA	GO:0005575,GO:0005623,GO:0005886,GO:0016020,GO:0044464,GO:0071944	ygaA	220341.16503901	7.15e-95	276.0	COG1238@1|root,COG1238@2|Bacteria,1RHUV@1224|Proteobacteria,1S69A@1236|Gammaproteobacteria,3ZM8R@590|Salmonella	1236|Gammaproteobacteria
g622	zipA	;zipA	Cell division protein ZipA;cell division protein ZipA	hit	D	Essential cell division protein that stabilizes the FtsZ protofilaments by cross-linking them and that serves as a cytoplasmic membrane anchor for the Z ring. Also required for the recruitment to the septal ring of downstream cell division proteins	zipA	GO:0000278,GO:0000281,GO:0000910,GO:0000917,GO:0005575,GO:0005623,GO:0005886,GO:0005887,GO:0007049,GO:0008150,GO:0009987,GO:0016020,GO:0016021,GO:0016043,GO:0022402,GO:0022607,GO:0031224,GO:0031226,GO:0032153,GO:0032506,GO:0044085,GO:0044425,GO:0044459,GO:0044464,GO:0051301,GO:0061640,GO:0071840,GO:0071944,GO:0090529,GO:1902410,GO:1903047	zipA	220341.16503647	3.69e-171	485.0	COG3115@1|root,COG3115@2|Bacteria,1MVHR@1224|Proteobacteria,1RMDB@1236|Gammaproteobacteria,3ZKEM@590|Salmonella	1236|Gammaproteobacteria
g623	group_2892	;yehR	hypothetical protein;DUF1307 domain-containing protein;Lipoprotein	hit	M	Protein of unknown function (DUF1307)	yehR	GO:0005575,GO:0005622,GO:0005623,GO:0005737,GO:0005829,GO:0044424,GO:0044444,GO:0044464	group_2892	220341.16503396	1.77e-98	286.0	COG4808@1|root,COG4808@2|Bacteria,1RG9F@1224|Proteobacteria,1S537@1236|Gammaproteobacteria,3ZKHD@590|Salmonella	1236|Gammaproteobacteria
g624	ilvB~~~ilvI	;ilvB;ilvI	Acetolactate synthase 3 catalytic subunit;biosynthetic-type acetolactate synthase large subunit;acetolactate synthase 3 large subunit	hit	H	Thiamine pyrophosphate enzyme, central domain	ilvI	GO:0000287,GO:0003674,GO:0003824,GO:0003984,GO:0005488,GO:0005575,GO:0005622,GO:0005623,GO:0005737,GO:0005829,GO:0006082,GO:0006520,GO:0006549,GO:0006573,GO:0006807,GO:0008150,GO:0008152,GO:0008652,GO:0009058,GO:0009081,GO:0009082,GO:0009097,GO:0009099,GO:0009987,GO:0016053,GO:0016740,GO:0016744,GO:0019752,GO:0019842,GO:0030976,GO:0036094,GO:0043167,GO:0043168,GO:0043169,GO:0043436,GO:0044237,GO:…	ilvB~~~ilvI	220341.16501401	0.0	1087.0	COG0028@1|root,COG0028@2|Bacteria,1MU6U@1224|Proteobacteria,1RMQQ@1236|Gammaproteobacteria,3ZIS2@590|Salmonella	1236|Gammaproteobacteria
g625	gltS	gltS	sodium/glutamate symporter	hit	P	Catalyzes the sodium-dependent transport of glutamate	gltS	GO:0003333,GO:0003674,GO:0005215,GO:0005283,GO:0005310,GO:0005342,GO:0005343,GO:0005416,GO:0005575,GO:0005623,GO:0005886,GO:0006810,GO:0006811,GO:0006812,GO:0006814,GO:0006820,GO:0006835,GO:0006865,GO:0008150,GO:0008324,GO:0008509,GO:0008514,GO:0015075,GO:0015077,GO:0015081,GO:0015171,GO:0015291,GO:0015293,GO:0015294,GO:0015318,GO:0015370,GO:0015501,GO:0015672,GO:0015711,GO:0015849,GO:0016020,GO:…	gltS	220341.16504870	8.15e-264	726.0	COG0786@1|root,COG0786@2|Bacteria,1MVBC@1224|Proteobacteria,1RP0S@1236|Gammaproteobacteria,3ZJS3@590|Salmonella	1236|Gammaproteobacteria
g626	leuO	;leuO	Leucine transcriptional activator;transcriptional regulator LeuO	hit	K	LysR substrate binding domain	leuO	GO:0003674,GO:0003676,GO:0003677,GO:0005488,GO:0005575,GO:0006355,GO:0008150,GO:0009889,GO:0010468,GO:0010556,GO:0019219,GO:0019222,GO:0031323,GO:0031326,GO:0032991,GO:0032993,GO:0043565,GO:0050789,GO:0050794,GO:0051171,GO:0051252,GO:0060255,GO:0065007,GO:0080090,GO:0097159,GO:1901363,GO:1903506,GO:2000112,GO:2001141	leuO	90371.CY43_00565	1.05e-227	627.0	COG0583@1|root,COG0583@2|Bacteria,1MX24@1224|Proteobacteria,1RQP0@1236|Gammaproteobacteria,3ZJD0@590|Salmonella	1236|Gammaproteobacteria
g627	yfcC	yfcC;	putative basic amino acid antiporter YfcC;hypothetical protein	hit	S	C4-dicarboxylate anaerobic carrier	yfcC	GO:0005575,GO:0005623,GO:0005886,GO:0016020,GO:0044464,GO:0071944	yfcC	220341.16503563	0.0	971.0	COG1288@1|root,COG1288@2|Bacteria,1MY1J@1224|Proteobacteria,1RS2M@1236|Gammaproteobacteria,3ZJT5@590|Salmonella	1236|Gammaproteobacteria
g628	group_2874	bisC;	dimethyl sulfoxide reductase subunit A;hypothetical protein	hit	C	Molybdopterin oxidoreductase Fe4S4 domain	-	-	group_2874	90371.CY43_13505	0.0	1594.0	COG0243@1|root,COG0243@2|Bacteria,1NR6J@1224|Proteobacteria,1RMVE@1236|Gammaproteobacteria,3ZJZP@590|Salmonella	1236|Gammaproteobacteria
g629	group_2872	;elyC	YdcF family protein;DUF218 domain-containing protein;multidrug MFS transporter	hit	S	DUF218 domain	-	-	group_2872	90371.CY43_00485	1.29e-140	397.0	COG1434@1|root,COG1434@2|Bacteria,1N0Q9@1224|Proteobacteria,1S98Q@1236|Gammaproteobacteria	1236|Gammaproteobacteria
g630	metB	;metB	O-succinylhomoserine (Thiol)-lyase;cystathionine gamma-synthase	hit	E	Cys/Met metabolism PLP-dependent enzyme	metB	GO:0000096,GO:0000097,GO:0003674,GO:0003824,GO:0003962,GO:0004123,GO:0005488,GO:0005575,GO:0005622,GO:0005623,GO:0005737,GO:0006082,GO:0006520,GO:0006555,GO:0006790,GO:0006807,GO:0008144,GO:0008150,GO:0008152,GO:0008652,GO:0009058,GO:0009066,GO:0009067,GO:0009086,GO:0009987,GO:0016053,GO:0016740,GO:0016765,GO:0016829,GO:0016846,GO:0019752,GO:0019842,GO:0030170,GO:0036094,GO:0043167,GO:0043168,GO:…	metB	220341.16504640	3.16e-279	763.0	COG0626@1|root,COG0626@2|Bacteria,1MU57@1224|Proteobacteria,1RMCV@1236|Gammaproteobacteria,3ZIWI@590|Salmonella	1236|Gammaproteobacteria
g631	group_2865		hypothetical protein;Membrane protein;DUF3300 domain-containing protein	hit	M	Protein of unknown function (DUF3300)	yacH	-	group_2865	90371.CY43_00790	1.37e-296	820.0	COG3064@1|root,COG3064@2|Bacteria,1MXPS@1224|Proteobacteria,1RQIV@1236|Gammaproteobacteria,3ZKYZ@590|Salmonella	1236|Gammaproteobacteria
g632	group_2857	;plsC	hypothetical protein;Acyltransferase;putative acyltransferase YihG;acyltransferase;putative acyltransferase yihG;1-acyl-sn-glycerol-3-phosphate acyltransferase	hit	I	Phosphate acyltransferases	yihG	GO:0005575,GO:0005623,GO:0005886,GO:0016020,GO:0044464,GO:0071944	group_2857	220341.16504738	9.86e-223	613.0	COG0204@1|root,COG0204@2|Bacteria,1MVWG@1224|Proteobacteria,1RR21@1236|Gammaproteobacteria,3ZKNT@590|Salmonella	1236|Gammaproteobacteria
g633	rplM	rplM	50S ribosomal protein L13	hit	J	This protein is one of the early assembly proteins of the 50S ribosomal subunit, although it is not seen to bind rRNA by itself. It is important during the early stages of 50S assembly	rplM	GO:0003674,GO:0003676,GO:0003723,GO:0003729,GO:0003735,GO:0005198,GO:0005488,GO:0005575,GO:0005622,GO:0005623,GO:0005737,GO:0005829,GO:0005840,GO:0006412,GO:0006417,GO:0006518,GO:0006807,GO:0008150,GO:0008152,GO:0008270,GO:0009058,GO:0009059,GO:0009889,GO:0009890,GO:0009892,GO:0009987,GO:0010467,GO:0010468,GO:0010556,GO:0010558,GO:0010605,GO:0010608,GO:0010629,GO:0015934,GO:0017148,GO:0019222,GO:…	rplM	1440052.EAKF1_ch2715	3.53e-100	290.0	COG0102@1|root,COG0102@2|Bacteria,1RA11@1224|Proteobacteria,1S280@1236|Gammaproteobacteria,3XP67@561|Escherichia	1236|Gammaproteobacteria
g634	group_2855		hypothetical protein;transporter;Outer membrane protein	hit	C	Putative MetA-pathway of phenol degradation	-	-	group_2855	90371.CY43_15915	4.66e-218	601.0	COG4313@1|root,COG4313@2|Bacteria,1R470@1224|Proteobacteria,1S1NY@1236|Gammaproteobacteria,3ZN21@590|Salmonella	1236|Gammaproteobacteria
g635	rplK	rplK	50S ribosomal protein L11	hit	J	Forms part of the ribosomal stalk which helps the ribosome interact with GTP-bound translation factors	rplK	GO:0000027,GO:0003674,GO:0003676,GO:0003723,GO:0003735,GO:0005198,GO:0005488,GO:0005575,GO:0005622,GO:0005623,GO:0005737,GO:0005829,GO:0005840,GO:0006412,GO:0006415,GO:0006518,GO:0006807,GO:0006950,GO:0006996,GO:0007154,GO:0008150,GO:0008152,GO:0009058,GO:0009059,GO:0009267,GO:0009605,GO:0009987,GO:0009991,GO:0010467,GO:0015934,GO:0015968,GO:0016043,GO:0019538,GO:0019843,GO:0022411,GO:0022607,GO:…	rplK	1197719.A464_4165	6.34e-94	274.0	COG0080@1|root,COG0080@2|Bacteria,1RA2M@1224|Proteobacteria,1S22R@1236|Gammaproteobacteria,3ZIPY@590|Salmonella	1236|Gammaproteobacteria
g636	tolR	tolR	colicin uptake protein TolR	hit	U	Biopolymer transport protein ExbD/TolR	tolR	GO:0005575,GO:0005623,GO:0005886,GO:0005887,GO:0006810,GO:0008150,GO:0015833,GO:0015893,GO:0016020,GO:0016021,GO:0031224,GO:0031226,GO:0032153,GO:0042221,GO:0042493,GO:0042886,GO:0042891,GO:0043213,GO:0044425,GO:0044459,GO:0044464,GO:0050896,GO:0051179,GO:0051234,GO:0071702,GO:0071705,GO:0071944	tolR	220341.16501978	2.48e-91	268.0	COG0848@1|root,COG0848@2|Bacteria,1MZ6M@1224|Proteobacteria,1S8RS@1236|Gammaproteobacteria,3ZM5Q@590|Salmonella	1236|Gammaproteobacteria
g637	pilV	pilV	prepilin-type N-terminal cleavage/methylation domain-containing protein	hit	NU	Type II secretion prepilin peptidase dependent protein C	ppdC	-	pilV	90371.CY43_15630	4.75e-68	206.0	COG4967@1|root,COG4967@2|Bacteria,1N1S1@1224|Proteobacteria,1S9AD@1236|Gammaproteobacteria,3ZMB2@590|Salmonella	1236|Gammaproteobacteria
g638	ndk	ndk	nucleoside-diphosphate kinase	hit	F	Major role in the synthesis of nucleoside triphosphates other than ATP. The ATP gamma phosphate is transferred to the NDP beta phosphate via a ping-pong mechanism, using a phosphorylated active-site intermediate	ndk	GO:0003674,GO:0003824,GO:0004550,GO:0005575,GO:0005622,GO:0005623,GO:0005737,GO:0005829,GO:0006139,GO:0006163,GO:0006165,GO:0006220,GO:0006725,GO:0006753,GO:0006793,GO:0006796,GO:0006807,GO:0008150,GO:0008152,GO:0009117,GO:0009132,GO:0009987,GO:0015949,GO:0016301,GO:0016310,GO:0016740,GO:0016772,GO:0016776,GO:0019205,GO:0019637,GO:0034641,GO:0044237,GO:0044238,GO:0044281,GO:0044424,GO:0044444,GO:…	ndk	220341.16503741	3.66e-98	285.0	COG0105@1|root,COG0105@2|Bacteria,1R9ZA@1224|Proteobacteria,1S1Z3@1236|Gammaproteobacteria,3ZJEF@590|Salmonella	1236|Gammaproteobacteria
g639	group_2816		Tripartite tricarboxylate transporter TctB family	hit	S	Tripartite tricarboxylate transporter TctB family	tctB	-	group_2816	220341.16503870	2.21e-99	288.0	2CQ1K@1|root,32SKA@2|Bacteria,1RDBC@1224|Proteobacteria,1S443@1236|Gammaproteobacteria,3ZM91@590|Salmonella	1236|Gammaproteobacteria
g640	group_2794		Glycosyl transferase;Putative glycosyl transferase;hypothetical protein	hit	Q	Hydrolase	-	-	group_2794	90371.CY43_03925	0.0	1284.0	COG5610@1|root,COG5610@2|Bacteria,1Q4T5@1224|Proteobacteria	1224|Proteobacteria
g641	rplO	rplO	50S ribosomal protein L15	hit	J	binds to the 23S rRNA	rplO	GO:0003674,GO:0003735,GO:0005198,GO:0005575,GO:0005622,GO:0005623,GO:0005737,GO:0005829,GO:0005840,GO:0006412,GO:0006518,GO:0006807,GO:0008150,GO:0008152,GO:0009058,GO:0009059,GO:0009987,GO:0010467,GO:0015934,GO:0019538,GO:0022625,GO:0022626,GO:0032991,GO:0034641,GO:0034645,GO:0043043,GO:0043170,GO:0043226,GO:0043228,GO:0043229,GO:0043232,GO:0043603,GO:0043604,GO:0044237,GO:0044238,GO:0044249,GO:…	rplO	1114922.CIFAM_27_00270	1.26e-85	253.0	COG0200@1|root,COG0200@2|Bacteria,1RDC8@1224|Proteobacteria,1S3P6@1236|Gammaproteobacteria,3WY82@544|Citrobacter	1236|Gammaproteobacteria
g642	slyA	slyA	transcriptional regulator SlyA	hit	K	Transcription regulator that can specifically activate or repress expression of target genes	slyA	GO:0001067,GO:0003674,GO:0003676,GO:0003677,GO:0003700,GO:0005488,GO:0006355,GO:0008150,GO:0009889,GO:0009890,GO:0009891,GO:0009892,GO:0009893,GO:0010468,GO:0010556,GO:0010557,GO:0010558,GO:0010604,GO:0010605,GO:0010628,GO:0010629,GO:0019219,GO:0019222,GO:0031323,GO:0031324,GO:0031325,GO:0031326,GO:0031327,GO:0031328,GO:0031333,GO:0031334,GO:0043254,GO:0044087,GO:0044089,GO:0044212,GO:0045892,GO:…	slyA	218493.SBG_1268	1.55e-95	278.0	COG1846@1|root,COG1846@2|Bacteria,1N78T@1224|Proteobacteria,1S26B@1236|Gammaproteobacteria,3ZM7N@590|Salmonella	1236|Gammaproteobacteria
g643	infC	infC	translation initiation factor IF-3	hit	J	binds to the 30S ribosomal subunit and shifts the equilibrum between 70S ribosomes and their 50S and 30S subunits in favor of the free subunits, thus enhancing the availability of 30S subunits on which protein synthesis initiation begins	infC	GO:0000049,GO:0001731,GO:0002181,GO:0002183,GO:0003674,GO:0003676,GO:0003723,GO:0003743,GO:0005488,GO:0005575,GO:0005622,GO:0005623,GO:0005737,GO:0005829,GO:0006412,GO:0006413,GO:0006417,GO:0006446,GO:0006518,GO:0006807,GO:0006950,GO:0006996,GO:0008135,GO:0008150,GO:0008152,GO:0009058,GO:0009059,GO:0009266,GO:0009409,GO:0009628,GO:0009889,GO:0009891,GO:0009893,GO:0009987,GO:0010467,GO:0010468,GO:…	infC	316407.1742797	8.78e-94	275.0	COG0290@1|root,COG0290@2|Bacteria,1RDD2@1224|Proteobacteria,1S4E6@1236|Gammaproteobacteria,3XMQM@561|Escherichia	1236|Gammaproteobacteria
g644	citS	citS;	Na+/citrate or Na+/malate symporter;hypothetical protein;citrate/sodium symporter CitS	hit	U	Uptake of citrate across the boundary membrane with the concomitant uptake of a sodium ion (symport system)	citS	-	citS	220341.16501341	4.41e-305	833.0	COG3493@1|root,COG3493@2|Bacteria,1NKCA@1224|Proteobacteria,1RN6E@1236|Gammaproteobacteria,3ZMV9@590|Salmonella	1236|Gammaproteobacteria
g645	group_2760		hypothetical protein;Succinate dehydrogenase flavoprotein subunit	hit	C	FAD binding domain	-	-	group_2760	469008.B21_04034	0.0	1080.0	COG1053@1|root,COG1053@2|Bacteria,1MWTS@1224|Proteobacteria,1S16S@1236|Gammaproteobacteria,3XNG6@561|Escherichia	1236|Gammaproteobacteria
g646	group_2757	;fimD	hypothetical protein;PapC-like porin protein involved in fimbrial biogenesis;Outer membrane usher protein;Outer membrane usher protein lpfC;fimbrial outer membrane usher protein;Fimbrial usher family protein;Outer membrane usher protein FimD/PapC;fimbria/pilus outer membrane usher protein	hit	NU	PapC C-terminal domain	-	-	group_2757	218493.SBG_4000	0.0	1626.0	COG3188@1|root,COG3188@2|Bacteria,1MUHE@1224|Proteobacteria,1RMPU@1236|Gammaproteobacteria,3ZK1S@590|Salmonella	1236|Gammaproteobacteria
g647	holD	holD	DNA polymerase III subunit psi	hit	H	DNA polymerase III is a complex, multichain enzyme responsible for most of the replicative synthesis in bacteria. This DNA polymerase also exhibits 3' to 5' exonuclease activity. The exact function of the psi subunit is	holD	GO:0008150,GO:0009314,GO:0009628,GO:0050896	holD	90371.CY43_23715	1.32e-101	294.0	COG3050@1|root,COG3050@2|Bacteria,1RH2F@1224|Proteobacteria,1S634@1236|Gammaproteobacteria,3ZM69@590|Salmonella	1236|Gammaproteobacteria
g648	group_2754	;citA	hypothetical protein;histidine kinase;Histidine kinase;Sensor histidine kinase DpiB	hit	T	Single cache domain 3	citA	-	group_2754	90371.CY43_00260	0.0	1078.0	COG3290@1|root,COG3290@2|Bacteria,1MXQ5@1224|Proteobacteria,1RNRF@1236|Gammaproteobacteria,3ZMY1@590|Salmonella	1236|Gammaproteobacteria
g649	ppdD	ppdD	prepilin peptidase-dependent pilin	hit	NU	Prokaryotic N-terminal methylation motif	ppdD	GO:0005575,GO:0005623,GO:0009289,GO:0042995,GO:0044464	ppdD	220341.16501431	5.38e-101	292.0	COG4969@1|root,COG4969@2|Bacteria,1N7EQ@1224|Proteobacteria,1SCES@1236|Gammaproteobacteria,3ZJZE@590|Salmonella	1236|Gammaproteobacteria
g650	dtd	dtd	D-aminoacyl-tRNA deacylase	hit	J	rejects L-amino acids rather than detecting D-amino acids in the active site. By recycling D-aminoacyl-tRNA to D-amino acids and free tRNA molecules, this enzyme counteracts the toxicity associated with the formation of D-aminoacyl-tRNA entities in vivo and helps enforce protein L-homochirality	dtd	GO:0002161,GO:0003674,GO:0003824,GO:0005575,GO:0005622,GO:0005623,GO:0005737,GO:0006139,GO:0006399,GO:0006450,GO:0006725,GO:0006807,GO:0006950,GO:0008150,GO:0008152,GO:0009266,GO:0009408,GO:0009628,GO:0009987,GO:0016070,GO:0016787,GO:0016788,GO:0034641,GO:0034660,GO:0043170,GO:0044237,GO:0044238,GO:0044424,GO:0044464,GO:0046483,GO:0050896,GO:0051499,GO:0051500,GO:0052689,GO:0065007,GO:0065008,GO:…	dtd	90371.CY43_21050	1.73e-97	283.0	COG1490@1|root,COG1490@2|Bacteria,1RGTV@1224|Proteobacteria,1S61I@1236|Gammaproteobacteria,3ZM9F@590|Salmonella	1236|Gammaproteobacteria
g651	pasT	pasT	type II toxin-antitoxin system RatA family toxin	hit	I	Polyketide cyclase / dehydrase and lipid transport	ratA	GO:0003674,GO:0005488,GO:0006417,GO:0006446,GO:0008150,GO:0009889,GO:0009890,GO:0009892,GO:0010468,GO:0010556,GO:0010558,GO:0010605,GO:0010608,GO:0010629,GO:0017148,GO:0019222,GO:0031323,GO:0031324,GO:0031326,GO:0031327,GO:0032268,GO:0032269,GO:0034248,GO:0034249,GO:0043021,GO:0043023,GO:0044877,GO:0045947,GO:0048519,GO:0048523,GO:0050789,GO:0050794,GO:0051171,GO:0051172,GO:0051246,GO:0051248,GO:…	pasT	220341.16503840	2.82e-99	288.0	COG2867@1|root,COG2867@2|Bacteria,1RGUH@1224|Proteobacteria,1S61C@1236|Gammaproteobacteria,3ZK0X@590|Salmonella	1236|Gammaproteobacteria
g652	ssrB	;ssrB	hypothetical protein;DNA-binding response regulator;LuxR C-terminal-related transcriptional regulator	hit	KT	Bacterial regulatory proteins, luxR family	ssrB	-	ssrB	220341.16502816	1.52e-151	426.0	COG2197@1|root,COG2197@2|Bacteria,1MWGM@1224|Proteobacteria,1S0QX@1236|Gammaproteobacteria,3ZN7F@590|Salmonella	1236|Gammaproteobacteria
g653	fUI1	fUI1;	putative allantoin permease;Permease cytosine/purine/uracil/thiamine/allantoin family;Allantoin permease;Putative allantoin permease;cytosine permease	hit	FH	Allantoin transport protein	ybbW	GO:0003674,GO:0005215,GO:0005575,GO:0005623,GO:0005886,GO:0006810,GO:0008150,GO:0015205,GO:0015851,GO:0016020,GO:0022857,GO:0044464,GO:0051179,GO:0051234,GO:0055085,GO:0071702,GO:0071705,GO:0071944	fUI1	199310.c0625	0.0	875.0	COG1953@1|root,COG1953@2|Bacteria,1MV18@1224|Proteobacteria,1RMZU@1236|Gammaproteobacteria,3XQNS@561|Escherichia	1236|Gammaproteobacteria
g654	mutK	mutK;	DUF808 domain-containing protein;hypothetical protein	hit	S	Protein of unknown function (DUF808)	yedI	GO:0005575,GO:0005623,GO:0005886,GO:0016020,GO:0044464,GO:0071944	mutK	90371.CY43_10465	4.11e-199	553.0	COG2354@1|root,COG2354@2|Bacteria,1MVYU@1224|Proteobacteria,1RMUZ@1236|Gammaproteobacteria,3ZKZ2@590|Salmonella	1236|Gammaproteobacteria
g655	group_2743	;rhaT	hypothetical protein;L-rhamnose/proton symporter RhaT;Rhamnose-proton symporter	hit	U	Uptake of L-rhamnose across the boundary membrane with the concomitant transport of protons into the cell (symport system)	rhaT	GO:0003674,GO:0005215,GO:0005575,GO:0005623,GO:0005886,GO:0006810,GO:0008150,GO:0008643,GO:0008645,GO:0015291,GO:0015293,GO:0015749,GO:0015762,GO:0016020,GO:0022804,GO:0022857,GO:0034219,GO:0044464,GO:0051179,GO:0051234,GO:0055085,GO:0071702,GO:0071944	group_2743	220341.16504687	1.42e-247	679.0	COG0697@1|root,2Z7ID@2|Bacteria,1MXB3@1224|Proteobacteria,1RQV6@1236|Gammaproteobacteria,3ZIRS@590|Salmonella	1236|Gammaproteobacteria
g656	rocR	;rocR	Regulatory protein;hypothetical protein;PAS domain S-box protein;sigma 54-interacting transcriptional regulator;sigma-54-dependent Fis family transcriptional regulator	hit	KT	PAS fold	-	-	rocR	90371.CY43_12635	0.0	938.0	COG3829@1|root,COG3829@2|Bacteria,1NU8B@1224|Proteobacteria,1RQ9C@1236|Gammaproteobacteria,3ZN49@590|Salmonella	1236|Gammaproteobacteria
g657	group_2737		hypothetical protein;DUF4459 domain-containing protein;YARHG domain-containing protein	hit	S	Domain of unknown function (DUF4459)	-	-	group_2737	220341.16504246	0.0	972.0	2EVAG@1|root,33NR3@2|Bacteria,1NP6T@1224|Proteobacteria	1224|Proteobacteria
g658	group_2736		hypothetical protein;Transporter;MFS transporter	hit	P	Sugar (and other) transporter	-	-	group_2736	90371.CY43_01065	1.53e-303	828.0	COG0477@1|root,COG0477@2|Bacteria,1MU46@1224|Proteobacteria,1RMF0@1236|Gammaproteobacteria,3ZKYF@590|Salmonella	1236|Gammaproteobacteria
g659	group_2734	;aslA	hypothetical protein;sulfatase-like hydrolase/transferase;Sulfatase;sulfatase	hit	P	Sulfatase	-	-	group_2734	90371.CY43_04735	0.0	1053.0	COG3119@1|root,COG3119@2|Bacteria,1MWY7@1224|Proteobacteria,1RZYW@1236|Gammaproteobacteria,3ZKMX@590|Salmonella	1236|Gammaproteobacteria
g660	group_2733	;aslA	hypothetical protein;Secreted sulfatase;sulfatase-like hydrolase/transferase;arylsulfatase	hit	P	Type I phosphodiesterase / nucleotide pyrophosphatase	-	-	group_2733	90371.CY43_00175	0.0	1019.0	COG3119@1|root,COG3119@2|Bacteria,1MUJH@1224|Proteobacteria,1RN2V@1236|Gammaproteobacteria,3ZK1P@590|Salmonella	1236|Gammaproteobacteria
g661	yjjU	;yjjU	DUF6363 domain-containing protein;Protein yjjU;patatin family protein	hit	S	Patatin-like phospholipase	yjjU	GO:0003674,GO:0003824,GO:0006950,GO:0006974,GO:0008150,GO:0009987,GO:0016787,GO:0033554,GO:0050896,GO:0051716	yjjU	220341.16505667	2.97e-260	713.0	COG4667@1|root,COG4667@2|Bacteria,1PV7M@1224|Proteobacteria,1RRPR@1236|Gammaproteobacteria,3ZKSG@590|Salmonella	1236|Gammaproteobacteria
g662	group_2728	;uraA	Permease;hypothetical protein;nucleobase:cation symporter;Xanthine/uracil permease	hit	F	Permease family	-	-	group_2728	90371.CY43_18855	5.05e-297	813.0	COG2233@1|root,COG2233@2|Bacteria,1MUN9@1224|Proteobacteria,1RZY7@1236|Gammaproteobacteria,3ZKU6@590|Salmonella	1236|Gammaproteobacteria
g663	sctA~~~sipD	sctA;;sipD	type III secretion system needle tip protein SctA;Cell invasion protein SipD;hypothetical protein;SPI-1 type III secretion system needle tip complex protein SipD	hit	S	Invasion plasmid antigen IpaD	sipD	-	sctA~~~sipD	220341.16503961	8.63e-229	632.0	2C6J3@1|root,32RHE@2|Bacteria,1RGX9@1224|Proteobacteria,1SE7A@1236|Gammaproteobacteria,3ZJ0X@590|Salmonella	1236|Gammaproteobacteria
g664	hemB	;hemB	Delta-aminolevulinic acid dehydratase;porphobilinogen synthase	hit	H	Delta-aminolevulinic acid dehydratase	hemB	GO:0000287,GO:0003674,GO:0003824,GO:0004655,GO:0005488,GO:0005575,GO:0005622,GO:0005623,GO:0005737,GO:0005829,GO:0006725,GO:0006778,GO:0006779,GO:0006783,GO:0006807,GO:0008150,GO:0008152,GO:0008270,GO:0009058,GO:0009987,GO:0016829,GO:0016835,GO:0016836,GO:0018130,GO:0019438,GO:0033013,GO:0033014,GO:0034641,GO:0042168,GO:0042440,GO:0043167,GO:0043169,GO:0044237,GO:0044249,GO:0044271,GO:0044424,GO:…	hemB	220341.16501641	2.39e-229	632.0	COG0113@1|root,COG0113@2|Bacteria,1MWMW@1224|Proteobacteria,1RP6Q@1236|Gammaproteobacteria,3ZJ90@590|Salmonella	1236|Gammaproteobacteria
g665	group_2719	;aslA	Sulfatase;Exported sulfatase;phosphatase	hit	P	Sulfatase	-	-	group_2719	1197719.A464_72	0.0	1260.0	COG3119@1|root,COG3119@2|Bacteria,1MV0B@1224|Proteobacteria,1RRY3@1236|Gammaproteobacteria,3ZKUH@590|Salmonella	1236|Gammaproteobacteria
g666	group_2718		amidohydrolase/deacetylase family metallohydrolase	hit	S	Amidohydrolase family	dho	-	group_2718	90371.CY43_23155	1.61e-272	745.0	COG3964@1|root,COG3964@2|Bacteria,1MVC7@1224|Proteobacteria,1RQQF@1236|Gammaproteobacteria,3ZIWK@590|Salmonella	1236|Gammaproteobacteria
g667	sipB	;sipB	type III secretion system translocon subunit SctE;hypothetical protein;type III secretion system needle tip complex protein;SPI-1 type III secretion system needle tip complex protein SipB	hit	S	Type III cell invasion protein SipB	sipB	-	sipB	220341.16503963	0.0	939.0	28N7Q@1|root,2ZBCB@2|Bacteria,1R9EB@1224|Proteobacteria,1S5E7@1236|Gammaproteobacteria,3ZK8B@590|Salmonella	1236|Gammaproteobacteria
g668	glnH	glnH;	glutamine ABC transporter substrate-binding protein GlnH;hypothetical protein;Glutamine ABC transporter substrate-binding protein	hit	ET	Ligated ion channel L-glutamate- and glycine-binding site	glnH	GO:0005575,GO:0005623,GO:0030288,GO:0030313,GO:0031975,GO:0042597,GO:0044464	glnH	220341.16502041	9.11e-175	488.0	COG0834@1|root,COG0834@2|Bacteria,1MV3Q@1224|Proteobacteria,1RRI5@1236|Gammaproteobacteria,3ZKNK@590|Salmonella	1236|Gammaproteobacteria
g669	group_2711	;lysR	LysR family transcriptional regulator;Putative LysR-family transcriptioanl regulator	hit	K	LysR substrate binding domain	-	-	group_2711	90371.CY43_19900	6.28e-213	588.0	COG0583@1|root,COG0583@2|Bacteria,1MUWX@1224|Proteobacteria,1RNZB@1236|Gammaproteobacteria,3ZN37@590|Salmonella	1236|Gammaproteobacteria
g670	iroB	;iroB	Glycosyltransferase IroB;DUF1205 domain-containing protein;salmochelin biosynthesis C-glycosyltransferase IroB	hit	CG	UDP-glucoronosyl and UDP-glucosyl transferase	iroB	-	iroB	90371.CY43_14500	4.09e-272	744.0	COG1819@1|root,COG1819@2|Bacteria,1PVBZ@1224|Proteobacteria,1RR45@1236|Gammaproteobacteria,3ZN1Z@590|Salmonella	1236|Gammaproteobacteria
g671	iroC	;iroC	ATP-binding protein;salmochelin/enterobactin export ABC transporter IroC	hit	V	ABC transporter transmembrane region	iroC	-	iroC	90371.CY43_14505	0.0	2259.0	COG1132@1|root,COG1132@2|Bacteria,1MUBM@1224|Proteobacteria,1RMUR@1236|Gammaproteobacteria,3ZN63@590|Salmonella	1236|Gammaproteobacteria
g672	group_2708		hypothetical protein;MotA/TolQ/ExbB proton channel family;Putative integral membrane protein;MotA/TolQ/ExbB proton channel family protein	hit	U	MotA/TolQ/ExbB proton channel family	-	-	group_2708	220341.16505245	1.1e-313	857.0	2AK9J@1|root,31AZY@2|Bacteria,1PBVW@1224|Proteobacteria,1SE19@1236|Gammaproteobacteria,3ZIV9@590|Salmonella	1236|Gammaproteobacteria
g673	emrA~~~siiD	;emrA;siiD	Type-I secretion protein;cation transporter;SPI-4 type I secretion system protein SiiD;HlyD family efflux transporter periplasmic adaptor subunit	hit	M	HlyD family secretion protein	siiD	-	emrA~~~siiD	90371.CY43_22235	7.69e-293	801.0	COG0845@1|root,COG0845@2|Bacteria,1MUI8@1224|Proteobacteria,1SHDD@1236|Gammaproteobacteria,3ZM3X@590|Salmonella	1236|Gammaproteobacteria
g674	mviM~~~yhhX	;mviM;yhhX	Putative dehydrogenase;oxidoreductase;hypothetical protein	hit	S	Oxidoreductase family, C-terminal alpha/beta domain	yhhX	GO:0005575,GO:0005622,GO:0005623,GO:0005737,GO:0005829,GO:0044424,GO:0044444,GO:0044464	mviM~~~yhhX	90371.CY43_18410	5e-253	693.0	COG0673@1|root,COG0673@2|Bacteria,1NHXV@1224|Proteobacteria,1RZPJ@1236|Gammaproteobacteria,3ZKN7@590|Salmonella	1236|Gammaproteobacteria
g675	group_2705		hypothetical protein	hit	-	-	-	-	group_2705	469595.CSAG_03651	1.19e-192	537.0	2C543@1|root,32W3W@2|Bacteria,1N5UD@1224|Proteobacteria,1TKK8@1236|Gammaproteobacteria,3WXTD@544|Citrobacter	1236|Gammaproteobacteria
g676	dgcN	;dgcN	Diguanylate cyclase;Signal transduction protein;diguanylate cyclase DgcN	hit	T	Periplasmic sensor domain	yfiN	GO:0003674,GO:0003824,GO:0005488,GO:0005515,GO:0005575,GO:0005623,GO:0005886,GO:0006950,GO:0008150,GO:0009987,GO:0016020,GO:0016740,GO:0016772,GO:0016779,GO:0032153,GO:0032879,GO:0033554,GO:0036460,GO:0040012,GO:0040013,GO:0042802,GO:0044464,GO:0048519,GO:0048523,GO:0050789,GO:0050794,GO:0050896,GO:0051270,GO:0051271,GO:0051716,GO:0052621,GO:0065007,GO:0071944,GO:1902021,GO:1902201,GO:2000145,GO:…	dgcN	220341.16503826	7.6e-288	786.0	COG2199@1|root,COG2199@2|Bacteria,1MXY1@1224|Proteobacteria,1RXYD@1236|Gammaproteobacteria,3ZJFR@590|Salmonella	1236|Gammaproteobacteria
g677	group_2699	;yehR	DUF1307 domain-containing protein;hypothetical protein	hit	S	Protein of unknown function (DUF1307)	yehR	-	group_2699	220341.16503397	1.57e-90	268.0	COG4808@1|root,COG4808@2|Bacteria,1RKNY@1224|Proteobacteria,1S79A@1236|Gammaproteobacteria,3ZMV1@590|Salmonella	1236|Gammaproteobacteria
g678	pipB2	;pipB2	Effector protein PipB2;hypothetical protein;type III secretion system effector PipB2	hit	S	Pentapeptide repeats (9 copies)	-	-	pipB2	90371.CY43_14530	2.34e-105	320.0	COG1357@1|root,COG1357@2|Bacteria,1N7U9@1224|Proteobacteria,1RTKB@1236|Gammaproteobacteria,3ZN24@590|Salmonella	1236|Gammaproteobacteria
g679	ahr	;ahr	Zinc-type alcohol dehydrogenase;Zinc-binding dehydrogenase;Aldehyde reductase Ahr	hit	C	Alanine dehydrogenase/PNT, C-terminal domain	yjgB	GO:0003674,GO:0003824,GO:0004033,GO:0005488,GO:0008106,GO:0008150,GO:0008152,GO:0008270,GO:0016491,GO:0016614,GO:0016616,GO:0043167,GO:0043169,GO:0046872,GO:0046914,GO:0055114	ahr	90371.CY43_23360	2.88e-249	683.0	COG1064@1|root,COG1064@2|Bacteria,1MUTT@1224|Proteobacteria,1RN4D@1236|Gammaproteobacteria,3ZJK5@590|Salmonella	1236|Gammaproteobacteria
g680	group_2692	;uhpC	hypothetical protein;MFS transporter;Permease	hit	G	Major Facilitator Superfamily	-	-	group_2692	90371.CY43_12195	0.0	875.0	COG2271@1|root,COG2271@2|Bacteria,1MUEK@1224|Proteobacteria,1RMB4@1236|Gammaproteobacteria,3ZK5V@590|Salmonella	1236|Gammaproteobacteria
g681	group_2691	arcA;	arginine deiminase;Arginine deiminase	hit	E	Amidinotransferase	arcA	GO:0003674,GO:0003824,GO:0006082,GO:0006464,GO:0006520,GO:0006525,GO:0006527,GO:0006807,GO:0008150,GO:0008152,GO:0008218,GO:0009056,GO:0009063,GO:0009064,GO:0009065,GO:0009987,GO:0016054,GO:0016787,GO:0016810,GO:0016813,GO:0016990,GO:0018101,GO:0018193,GO:0018195,GO:0019538,GO:0019752,GO:0036211,GO:0043170,GO:0043412,GO:0043436,GO:0044237,GO:0044238,GO:0044248,GO:0044260,GO:0044267,GO:0044281,GO:…	group_2691	220341.16505575	1.16e-305	832.0	COG2235@1|root,COG2235@2|Bacteria,1NCGV@1224|Proteobacteria,1RM99@1236|Gammaproteobacteria,3ZK2M@590|Salmonella	1236|Gammaproteobacteria
g682	mioC	mioC	FMN-binding protein MioC	hit	C	Flavodoxin	mioC	GO:0000166,GO:0003674,GO:0005488,GO:0005575,GO:0005622,GO:0005623,GO:0005737,GO:0005829,GO:0008150,GO:0010181,GO:0032553,GO:0036094,GO:0043167,GO:0043168,GO:0044424,GO:0044444,GO:0044464,GO:0048037,GO:0050662,GO:0050789,GO:0050794,GO:0051302,GO:0065007,GO:0097159,GO:0097367,GO:1901265,GO:1901363	mioC	220341.16504756	2.27e-103	298.0	COG0716@1|root,COG0716@2|Bacteria,1N30T@1224|Proteobacteria,1S403@1236|Gammaproteobacteria,3ZM8G@590|Salmonella	1236|Gammaproteobacteria
g683	fliJ	fliJ	flagella biosynthesis chaperone FliJ	hit	N	Flagellar protein that affects chemotactic events	fliJ	GO:0005575,GO:0005623,GO:0005886,GO:0016020,GO:0044464,GO:0071944	fliJ	220341.16503214	1.66e-96	281.0	COG2882@1|root,COG2882@2|Bacteria,1RHFM@1224|Proteobacteria,1S76M@1236|Gammaproteobacteria,3ZJDY@590|Salmonella	1236|Gammaproteobacteria
g684	yhbP	yhbP	YhbP family protein	hit	S	Belongs to the UPF0306 family	yhbP	GO:0005575,GO:0005622,GO:0005623,GO:0005737,GO:0005829,GO:0044424,GO:0044444,GO:0044464	yhbP	220341.16504340	2.45e-107	308.0	COG3787@1|root,COG3787@2|Bacteria,1RH76@1224|Proteobacteria,1S6F1@1236|Gammaproteobacteria,3ZKGS@590|Salmonella	1236|Gammaproteobacteria
g685	group_2690		hypothetical protein	hit	-	-	-	-	group_2690	220341.16505010	2.1e-98	286.0	2BW4S@1|root,32ZQD@2|Bacteria,1N781@1224|Proteobacteria,1SDYR@1236|Gammaproteobacteria	1236|Gammaproteobacteria
g686	moaC	moaC	cyclic pyranopterin monophosphate synthase MoaC	hit	H	Catalyzes the conversion of (8S)-3',8-cyclo-7,8- dihydroguanosine 5'-triphosphate to cyclic pyranopterin monophosphate (cPMP)	moaC	GO:0003674,GO:0003824,GO:0005488,GO:0005515,GO:0006732,GO:0006777,GO:0006793,GO:0006796,GO:0006807,GO:0008150,GO:0008152,GO:0009058,GO:0009108,GO:0009987,GO:0016043,GO:0016829,GO:0016849,GO:0018130,GO:0019538,GO:0019637,GO:0019720,GO:0022607,GO:0034214,GO:0042802,GO:0043170,GO:0043545,GO:0043933,GO:0044085,GO:0044237,GO:0044238,GO:0044249,GO:0044260,GO:0044267,GO:0046483,GO:0051186,GO:0051188,GO:…	moaC	90371.CY43_04315	5.63e-98	285.0	COG0315@1|root,COG0315@2|Bacteria,1RCYZ@1224|Proteobacteria,1S3ST@1236|Gammaproteobacteria,3ZKFV@590|Salmonella	1236|Gammaproteobacteria
g687	holC	holC	DNA polymerase III subunit chi	hit	L	DNA polymerase III chi subunit, HolC	holC	GO:0005575,GO:0005622,GO:0005623,GO:0006275,GO:0008150,GO:0009314,GO:0009360,GO:0009628,GO:0009889,GO:0009891,GO:0009893,GO:0010556,GO:0010557,GO:0010604,GO:0019219,GO:0019222,GO:0030174,GO:0031323,GO:0031325,GO:0031326,GO:0031328,GO:0032298,GO:0032991,GO:0042575,GO:0043846,GO:0043847,GO:0044424,GO:0044464,GO:0045740,GO:0045935,GO:0048518,GO:0048522,GO:0050789,GO:0050794,GO:0050896,GO:0051052,GO:…	holC	220341.16505585	1.24e-103	300.0	COG2927@1|root,COG2927@2|Bacteria,1MZ3V@1224|Proteobacteria,1S94K@1236|Gammaproteobacteria,3ZKT4@590|Salmonella	1236|Gammaproteobacteria
g688	csdE	csdE	cysteine desulfurase sulfur acceptor subunit CsdE	hit	S	Fe-S metabolism associated domain	csdE	GO:0003674,GO:0006139,GO:0006396,GO:0006399,GO:0006400,GO:0006725,GO:0006807,GO:0008033,GO:0008150,GO:0008152,GO:0009451,GO:0009987,GO:0010467,GO:0016070,GO:0034470,GO:0034641,GO:0034660,GO:0043170,GO:0043412,GO:0044237,GO:0044238,GO:0046483,GO:0061504,GO:0071704,GO:0090304,GO:0097163,GO:0140104,GO:1901360	csdE	220341.16504065	1.79e-100	291.0	COG2166@1|root,COG2166@2|Bacteria,1REQB@1224|Proteobacteria,1S44J@1236|Gammaproteobacteria,3ZM57@590|Salmonella	1236|Gammaproteobacteria
g689	group_2686	ptsN	PTS ascorbate transporter subunit IIA	hit	G	Phosphoenolpyruvate-dependent sugar phosphotransferase system, EIIA 2	ulaC	-	group_2686	90371.CY43_12545	5.35e-102	295.0	COG1762@1|root,COG1762@2|Bacteria,1RDN9@1224|Proteobacteria,1S4GP@1236|Gammaproteobacteria,3ZKQP@590|Salmonella	1236|Gammaproteobacteria
g690	nuoA	nuoA	NADH-quinone oxidoreductase subunit NuoA	hit	C	NDH-1 shuttles electrons from NADH, via FMN and iron- sulfur (Fe-S) centers, to quinones in the respiratory chain. The immediate electron acceptor for the enzyme in this species is believed to be ubiquinone. Couples the redox reaction to proton translocation (for every two electrons transferred, four hydrogen ions are translocated across the cytoplasmic membrane), and thus conserves the redox ene…	nuoA	GO:0003674,GO:0003824,GO:0003954,GO:0005575,GO:0005623,GO:0005886,GO:0005887,GO:0008137,GO:0008150,GO:0008152,GO:0016020,GO:0016021,GO:0016491,GO:0016651,GO:0016655,GO:0030964,GO:0031224,GO:0031226,GO:0032991,GO:0044425,GO:0044459,GO:0044464,GO:0045271,GO:0045272,GO:0050136,GO:0055114,GO:0070469,GO:0070470,GO:0071944,GO:0098796,GO:0098797,GO:0098803,GO:1902494,GO:1990204	nuoA	1197719.A464_2443	1.48e-99	289.0	COG0838@1|root,COG0838@2|Bacteria,1RGUT@1224|Proteobacteria,1S644@1236|Gammaproteobacteria,3ZKP5@590|Salmonella	1236|Gammaproteobacteria
g691	spaM	spaM	SPI-1 type III secretion system protein SpaM	hit	S	Salmonella surface presentation of antigen gene type M protein	spaM	-	spaM	90371.CY43_15105	1.19e-80	241.0	2C1FY@1|root,33H0B@2|Bacteria,1NM6D@1224|Proteobacteria,1SUNT@1236|Gammaproteobacteria,3ZM61@590|Salmonella	1236|Gammaproteobacteria
g692	invH	invH	SPI-1 type III secretion system invasion lipoprotein InvH	hit	S	InvH outer membrane lipoprotein	invH	-	invH	220341.16503978	6.75e-96	280.0	2B0SW@1|root,31T59@2|Bacteria,1QQUQ@1224|Proteobacteria,1RTIK@1236|Gammaproteobacteria,3ZMGQ@590|Salmonella	1236|Gammaproteobacteria
g693	group_2683	;eAL	CSS-motif domain-containing protein;Anti-FlhC(2)FlhD(4) factor YdiV;cyclic diguanylate phosphodiesterase	hit	T	CSS motif domain associated with EAL	yoaD	GO:0006950,GO:0006974,GO:0008150,GO:0009987,GO:0033554,GO:0050896,GO:0051716	group_2683	90371.CY43_09330	0.0	1027.0	COG2200@1|root,COG2200@2|Bacteria,1QUCV@1224|Proteobacteria,1T1TN@1236|Gammaproteobacteria,3ZJC1@590|Salmonella	1236|Gammaproteobacteria
g694	group_2682	lysR;	DNA-binding transcriptional regulator LysR family;LysR family transcriptional regulator;hypothetical protein;LysR family transcriptional regulator YfiE;HTH lysR-type domain-containing protein	hit	K	LysR substrate binding domain	yfiE	GO:0006139,GO:0006351,GO:0006725,GO:0006807,GO:0008150,GO:0008152,GO:0009058,GO:0009059,GO:0009987,GO:0010467,GO:0016070,GO:0018130,GO:0019438,GO:0032774,GO:0034641,GO:0034645,GO:0034654,GO:0043170,GO:0044237,GO:0044238,GO:0044249,GO:0044260,GO:0044271,GO:0046483,GO:0071704,GO:0090304,GO:0097659,GO:1901360,GO:1901362,GO:1901576	group_2682	218493.SBG_2362	4.41e-220	607.0	COG0583@1|root,COG0583@2|Bacteria,1P8X0@1224|Proteobacteria,1RPH4@1236|Gammaproteobacteria,3ZJ0C@590|Salmonella	1236|Gammaproteobacteria
g695	caiC	;caiC	hypothetical protein;crotonobetaine/carnitine-CoA ligase	hit	IQ	Could catalyze the transfer of CoA to carnitine, generating the initial carnitinyl-CoA needed for the CaiB reaction cycle	caiC	GO:0003674,GO:0003824,GO:0016405,GO:0016874,GO:0016877,GO:0016879,GO:0016881,GO:0051108,GO:0051109	caiC	220341.16501354	0.0	1053.0	COG0318@1|root,COG0318@2|Bacteria,1MU6G@1224|Proteobacteria,1RMQ4@1236|Gammaproteobacteria,3ZKD0@590|Salmonella	1236|Gammaproteobacteria
g696	mauG	mauG;	cytochrome-c peroxidase;Cytochrome C peroxidase	hit	C	Di-haem cytochrome c peroxidase	yhjA	GO:0000302,GO:0003674,GO:0003824,GO:0004130,GO:0004601,GO:0005488,GO:0006091,GO:0006950,GO:0006979,GO:0008150,GO:0008152,GO:0009061,GO:0009636,GO:0009987,GO:0010035,GO:0015980,GO:0016209,GO:0016491,GO:0016684,GO:0016999,GO:0017144,GO:0019645,GO:0020037,GO:0022900,GO:0022904,GO:0042221,GO:0042493,GO:0042542,GO:0042743,GO:0044237,GO:0045333,GO:0046677,GO:0046906,GO:0048037,GO:0050896,GO:0051186,GO:…	mauG	220341.16504807	0.0	959.0	COG1858@1|root,COG1858@2|Bacteria,1MV70@1224|Proteobacteria,1RPPQ@1236|Gammaproteobacteria,3ZJPF@590|Salmonella	1236|Gammaproteobacteria
g697	fucI~~~fucK	fucI;fucK	L-fucose isomerase;L-fuculokinase	hit	G	Converts the aldose L-fucose into the corresponding ketose L-fuculose	fucI	GO:0003674,GO:0003824,GO:0005488,GO:0005515,GO:0005575,GO:0005622,GO:0005623,GO:0005737,GO:0005975,GO:0005996,GO:0006004,GO:0008150,GO:0008152,GO:0008736,GO:0008790,GO:0009056,GO:0016052,GO:0016853,GO:0016860,GO:0016861,GO:0019317,GO:0019318,GO:0019320,GO:0019321,GO:0019323,GO:0019566,GO:0019568,GO:0019571,GO:0042354,GO:0042355,GO:0042802,GO:0044238,GO:0044281,GO:0044282,GO:0044424,GO:0044464,GO:…	fucI~~~fucK	90371.CY43_15525	0.0	1205.0	COG2407@1|root,COG2407@2|Bacteria,1MVD3@1224|Proteobacteria,1RYI3@1236|Gammaproteobacteria,3ZN30@590|Salmonella	1236|Gammaproteobacteria
g698	group_2675		TetR family transcriptional regulator;TetR/AcrR family transcriptional regulator	hit	K	Bacterial regulatory proteins, tetR family	-	-	group_2675	220341.16501832	1.93e-131	373.0	COG1309@1|root,COG1309@2|Bacteria,1RIMK@1224|Proteobacteria,1SANF@1236|Gammaproteobacteria,3ZJUR@590|Salmonella	1236|Gammaproteobacteria
g699	bglJ	;bglJ	DNA-binding transcriptional activator BglJ	hit	K	helix_turn_helix, Lux Regulon	bglJ	GO:0003674,GO:0003700,GO:0006355,GO:0008150,GO:0009314,GO:0009628,GO:0009889,GO:0009891,GO:0009893,GO:0010468,GO:0010556,GO:0010557,GO:0010604,GO:0010628,GO:0019219,GO:0019222,GO:0031323,GO:0031325,GO:0031326,GO:0031328,GO:0045893,GO:0045935,GO:0048518,GO:0048522,GO:0050789,GO:0050794,GO:0050896,GO:0051171,GO:0051173,GO:0051252,GO:0051254,GO:0060255,GO:0065007,GO:0080090,GO:0140110,GO:1902680,GO:…	bglJ	220341.16505655	3.65e-143	405.0	COG2197@1|root,COG2197@2|Bacteria,1RBIN@1224|Proteobacteria,1S2HI@1236|Gammaproteobacteria,3ZKMG@590|Salmonella	1236|Gammaproteobacteria
g700	group_2672		Arylsulfate sulfotransferase;Arylsulfate sulfo transferase;aryl-sulfate sulfotransferase;Arylsulfate sulfotransferase AssT	hit	M	Catalyzes the transfer of sulfuryl groups between phenolic compounds	assT	GO:0003674,GO:0005488,GO:0005515,GO:0042802	group_2672	220341.16504269	0.0	1229.0	28MBK@1|root,2ZAQ1@2|Bacteria,1R5CV@1224|Proteobacteria,1RQPD@1236|Gammaproteobacteria,3ZKW9@590|Salmonella	1236|Gammaproteobacteria
g701	yiiM	;yiiM	MOSC domain-containing protein;6-hydroxyaminopurine reductase	hit	S	3-alpha domain	yiiM	GO:0005575,GO:0005622,GO:0005623,GO:0005737,GO:0005829,GO:0008150,GO:0008152,GO:0009056,GO:0009404,GO:0009407,GO:0009636,GO:0009987,GO:0019748,GO:0042221,GO:0044237,GO:0044248,GO:0044424,GO:0044444,GO:0044464,GO:0050896,GO:0098754	yiiM	220341.16504682	2.12e-169	473.0	COG2258@1|root,COG2258@2|Bacteria,1RAPM@1224|Proteobacteria,1RRB8@1236|Gammaproteobacteria,3ZKVN@590|Salmonella	1236|Gammaproteobacteria
g702	group_2668		ABC-type cobalt transport system permease;cobalt ABC transporter permease	hit	P	Cobalt transport protein	-	-	group_2668	90371.CY43_16025	3.03e-167	467.0	COG0619@1|root,COG0619@2|Bacteria,1RA5H@1224|Proteobacteria,1S2XN@1236|Gammaproteobacteria,3ZJI9@590|Salmonella	1236|Gammaproteobacteria
g703	group_2663		hypothetical protein;flagellin FliC;Flagellin	hit	N	Flagellin is the subunit protein which polymerizes to form the filaments of bacterial flagella	fliC	-	group_2663	1218086.BBNB01000001_gene3838	2.53e-238	669.0	COG1344@1|root,COG1344@2|Bacteria,1MV1N@1224|Proteobacteria,1RN0Y@1236|Gammaproteobacteria,3WW8U@544|Citrobacter	1236|Gammaproteobacteria
g704	group_2661	soxR	helix-turn-helix-type transcriptional regulator	hit	K	MerR family regulatory protein	ycgE	-	group_2661	220341.16502817	2.32e-179	498.0	COG0789@1|root,COG0789@2|Bacteria,1R9SN@1224|Proteobacteria,1S967@1236|Gammaproteobacteria,3ZJQI@590|Salmonella	1236|Gammaproteobacteria
g705	ytcJ	;ytcJ	amidohydrolase family protein;Putative periplasmic protein;hypothetical protein;amidohydrolase;Amidohydro-3 domain-containing protein	hit	S	Amidohydrolase family	-	-	ytcJ	220341.16502739	0.0	1104.0	COG1574@1|root,COG1574@2|Bacteria,1MWP2@1224|Proteobacteria,1RNB7@1236|Gammaproteobacteria,3ZJCA@590|Salmonella	1236|Gammaproteobacteria
g706	cysH	;cysH	phosphoadenylyl-sulfate reductase;3'-phosphoadenosine 5'-phosphosulfate sulfotransferase;phosphoadenosine phosphosulfate reductase	hit	EH	Reduction of activated sulfate into sulfite	cysH	GO:0000103,GO:0003674,GO:0003824,GO:0004604,GO:0005575,GO:0005622,GO:0005623,GO:0005737,GO:0006790,GO:0008150,GO:0008152,GO:0009987,GO:0016491,GO:0016667,GO:0016671,GO:0019379,GO:0019419,GO:0044237,GO:0044424,GO:0044464,GO:0055114	cysH	90371.CY43_15370	8.71e-176	489.0	COG0175@1|root,COG0175@2|Bacteria,1MXUR@1224|Proteobacteria,1RNC5@1236|Gammaproteobacteria,3ZJ02@590|Salmonella	1236|Gammaproteobacteria
g707	group_2656		[Ribosomal protein S18]-alanine N-acetyltransferase	hit	K	This enzyme acetylates the N-terminal alanine of ribosomal protein S18	rimI	GO:0003674,GO:0003824,GO:0004596,GO:0005575,GO:0005622,GO:0005623,GO:0005737,GO:0006464,GO:0006473,GO:0006474,GO:0006807,GO:0008080,GO:0008150,GO:0008152,GO:0008999,GO:0009987,GO:0010467,GO:0016407,GO:0016410,GO:0016740,GO:0016746,GO:0016747,GO:0017189,GO:0018193,GO:0018194,GO:0019538,GO:0031365,GO:0034212,GO:0036211,GO:0043170,GO:0043412,GO:0043543,GO:0044237,GO:0044238,GO:0044260,GO:0044267,GO:…	group_2656	220341.16505662	1.66e-101	294.0	COG0454@1|root,COG0456@2|Bacteria,1RIE6@1224|Proteobacteria,1S9G0@1236|Gammaproteobacteria,3ZM8P@590|Salmonella	1236|Gammaproteobacteria
g708	group_2655	hcp	Type VI protein secretion system component Hcp (secreted cytotoxin)	hit	S	Type VI secretion system effector, Hcp	-	-	group_2655	90371.CY43_23480	6.01e-104	300.0	COG3157@1|root,COG3157@2|Bacteria,1RF09@1224|Proteobacteria,1RTI9@1236|Gammaproteobacteria,3ZM8E@590|Salmonella	1236|Gammaproteobacteria
g709	ycgN	ycgN	YcgN family cysteine cluster protein	hit	S	Putative zinc- or iron-chelating domain	ycgN	-	ycgN	90371.CY43_09250	5.22e-115	328.0	COG2983@1|root,COG2983@2|Bacteria,1RHMX@1224|Proteobacteria,1S5XU@1236|Gammaproteobacteria,3ZKCR@590|Salmonella	1236|Gammaproteobacteria
g710	rfaL	;rfaL	O-antigen ligase;O-antigen ligase RfaL;hypothetical protein;Oligosaccharide repeat unit polymerase Wzy O-antigen ligase	hit	M	O-antigen ligase like membrane protein	rfaL	-	rfaL	220341.16504902	1.65e-284	778.0	COG3307@1|root,COG3307@2|Bacteria,1QAGT@1224|Proteobacteria,1RY8K@1236|Gammaproteobacteria,3ZKX6@590|Salmonella	1236|Gammaproteobacteria
g711	dcyD	;dcyD	D-cysteine desulfhydrase;pyridoxal-phosphate dependent enzyme	hit	E	Catalyzes the alpha,beta-elimination reaction of D- cysteine and of several D-cysteine derivatives. It could be a defense mechanism against D-cysteine	dcyD	GO:0000096,GO:0000098,GO:0003674,GO:0003824,GO:0005488,GO:0005575,GO:0005622,GO:0005623,GO:0005737,GO:0005829,GO:0006082,GO:0006520,GO:0006534,GO:0006790,GO:0006791,GO:0006807,GO:0006950,GO:0007154,GO:0008144,GO:0008150,GO:0008152,GO:0009056,GO:0009063,GO:0009069,GO:0009071,GO:0009093,GO:0009267,GO:0009605,GO:0009987,GO:0009991,GO:0010438,GO:0016054,GO:0016829,GO:0016846,GO:0016848,GO:0019148,GO:…	dcyD	90371.CY43_10290	7.17e-233	641.0	COG2515@1|root,COG2515@2|Bacteria,1MVYF@1224|Proteobacteria,1RMYP@1236|Gammaproteobacteria,3ZK6A@590|Salmonella	1236|Gammaproteobacteria
g712	yecC	;yecC	ABC transporter ATP-binding protein;Putative cystine ABC-transporter ATP-binding protein;L-cystine ABC transporter ATP-binding protein YecC	hit	E	AAA domain	yecC	GO:0000099,GO:0000101,GO:0000166,GO:0003333,GO:0003674,GO:0005215,GO:0005342,GO:0005488,GO:0005524,GO:0005575,GO:0005623,GO:0005886,GO:0006810,GO:0006811,GO:0006820,GO:0006865,GO:0008144,GO:0008150,GO:0008509,GO:0008514,GO:0015075,GO:0015171,GO:0015179,GO:0015184,GO:0015318,GO:0015711,GO:0015804,GO:0015807,GO:0015811,GO:0015849,GO:0016020,GO:0017076,GO:0022857,GO:0030554,GO:0032553,GO:0032555,GO:…	yecC	220341.16503194	2.79e-175	489.0	COG1126@1|root,COG1126@2|Bacteria,1MU9Q@1224|Proteobacteria,1RMX1@1236|Gammaproteobacteria,3ZJX4@590|Salmonella	1236|Gammaproteobacteria
g713	adeP	;adeP	hypothetical protein;Xanthine/uracil permease family protein;adenine permease AdeP	hit	S	Permease family	purP	GO:0003674,GO:0005215,GO:0005345,GO:0005575,GO:0005623,GO:0005886,GO:0006810,GO:0006811,GO:0006812,GO:0006863,GO:0008150,GO:0008324,GO:0015075,GO:0015077,GO:0015078,GO:0015205,GO:0015207,GO:0015291,GO:0015293,GO:0015294,GO:0015295,GO:0015318,GO:0015672,GO:0015851,GO:0015853,GO:0016020,GO:0022804,GO:0022857,GO:0022890,GO:0034220,GO:0044464,GO:0051179,GO:0051234,GO:0055085,GO:0071702,GO:0071705,GO:…	adeP	90371.CY43_20185	2.41e-297	814.0	COG2252@1|root,COG2252@2|Bacteria,1MUV0@1224|Proteobacteria,1RMBE@1236|Gammaproteobacteria,3ZJW6@590|Salmonella	1236|Gammaproteobacteria
g714	paaJ	;paaJ	acetyl-CoA C-acyltransferase;3-ketoacyl-CoA thiolase/acetyl-CoA acetyltransferase	hit	I	Thiolase, N-terminal domain	yqeF	GO:0003674,GO:0003824,GO:0003988,GO:0005575,GO:0005622,GO:0005623,GO:0005737,GO:0006066,GO:0006082,GO:0006629,GO:0006631,GO:0006635,GO:0008150,GO:0008152,GO:0009056,GO:0009058,GO:0009062,GO:0009987,GO:0016042,GO:0016054,GO:0016408,GO:0016740,GO:0016746,GO:0016747,GO:0019395,GO:0019752,GO:0030258,GO:0032787,GO:0034308,GO:0034309,GO:0034440,GO:0043436,GO:0044237,GO:0044238,GO:0044242,GO:0044248,GO:…	paaJ	220341.16504099	2.8e-276	756.0	COG0183@1|root,COG0183@2|Bacteria,1MU5G@1224|Proteobacteria,1RM93@1236|Gammaproteobacteria,3ZK14@590|Salmonella	1236|Gammaproteobacteria
g715	miaE	;miaE	tRNA-(Ms[2]io[6]A)-hydroxylase;tRNA isopentenyl-2-thiomethyl-A-37 hydroxylase MiaE	hit	FJ	tRNA-(MS[2]IO[6]A)-hydroxylase (MiaE)	miaE	-	miaE	220341.16505579	1.63e-185	515.0	COG4445@1|root,COG4445@2|Bacteria,1MVFE@1224|Proteobacteria,1RQ8Z@1236|Gammaproteobacteria,3ZKXV@590|Salmonella	1236|Gammaproteobacteria
g716	ytgA	;ytgA	DUF3617 domain-containing protein;hypothetical protein;Uncharacterized protein YtgA	hit	S	Protein of unknown function (DUF3617)	-	-	ytgA	220341.16505581	1.13e-108	313.0	2F6VN@1|root,33ZBS@2|Bacteria,1NYER@1224|Proteobacteria,1SQFP@1236|Gammaproteobacteria,3ZMXM@590|Salmonella	1236|Gammaproteobacteria
g717	group_2651	hisJ	histidine ABC transporter substrate-binding protein HisJ	hit	ET	Bacterial extracellular solute-binding proteins, family 3	hisJ	GO:0003674,GO:0005488,GO:0005575,GO:0005623,GO:0016597,GO:0030288,GO:0030313,GO:0031406,GO:0031975,GO:0036094,GO:0042597,GO:0043167,GO:0043168,GO:0043177,GO:0044464	group_2651	90371.CY43_12600	1.35e-181	506.0	COG0834@1|root,COG0834@2|Bacteria,1NT2J@1224|Proteobacteria,1RRYR@1236|Gammaproteobacteria,3ZM16@590|Salmonella	1236|Gammaproteobacteria
g718	group_2650	;araC	Transcriptional regulator;HTH araC/xylS-type domain-containing protein;AraC/XylS family transcriptional regulator;AraC family transcriptional regulator	hit	K	helix_turn_helix, arabinose operon control protein	ybcM	GO:0003674,GO:0003700,GO:0006355,GO:0006950,GO:0006974,GO:0008150,GO:0009889,GO:0009987,GO:0010468,GO:0010556,GO:0019219,GO:0019222,GO:0031323,GO:0031326,GO:0033554,GO:0042221,GO:0046677,GO:0050789,GO:0050794,GO:0050896,GO:0051171,GO:0051252,GO:0051716,GO:0060255,GO:0065007,GO:0080090,GO:0140110,GO:1903506,GO:2000112,GO:2001141	group_2650	90371.CY43_05535	1.44e-180	503.0	COG2207@1|root,COG2207@2|Bacteria,1R71R@1224|Proteobacteria,1RPUM@1236|Gammaproteobacteria,3ZKHA@590|Salmonella	1236|Gammaproteobacteria
g719	group_2649		DUF2950 domain-containing protein;hypothetical protein	hit	N	Protein of unknown function (DUF2950)	-	-	group_2649	220341.16501443	2.44e-168	473.0	COG4786@1|root,COG4786@2|Bacteria,1MZXB@1224|Proteobacteria,1RN1W@1236|Gammaproteobacteria,3ZIQ7@590|Salmonella	1236|Gammaproteobacteria
g720	mltD	;mltD	Membrane-bound lytic murein transglycosylase D;Peptidoglycan lytic exotransglycosylase;transglycosylase SLT domain-containing protein;Membrane-bound lytic murein transglycosylase d;murein transglycosylase D	hit	M	Transglycosylase SLT domain	mltD	GO:0003674,GO:0003824,GO:0005575,GO:0005623,GO:0008150,GO:0008932,GO:0008933,GO:0009893,GO:0016020,GO:0016740,GO:0016757,GO:0019222,GO:0030288,GO:0030313,GO:0031975,GO:0042597,GO:0043085,GO:0044093,GO:0044464,GO:0048518,GO:0050789,GO:0050790,GO:0051341,GO:0051353,GO:0061783,GO:0065007,GO:0065009	mltD	220341.16501537	3.32e-294	805.0	COG0741@1|root,COG1388@1|root,COG0741@2|Bacteria,COG1388@2|Bacteria,1MWKE@1224|Proteobacteria,1RMFZ@1236|Gammaproteobacteria,3ZM4B@590|Salmonella	1236|Gammaproteobacteria
g721	group_2648	;araJ	MFS transporter;Uncharacterized MFS-type transporter ytbD;MFS sugar transporter	hit	U	Uncharacterised MFS-type transporter YbfB	ydhP	-	group_2648	220341.16501534	1.5e-259	714.0	COG0477@1|root,COG2814@2|Bacteria,1MU9G@1224|Proteobacteria,1RM9G@1236|Gammaproteobacteria,3ZNGE@590|Salmonella	1236|Gammaproteobacteria
g722	asrA	asrA;	anaerobic sulfite reductase subunit AsrA;Reductase	hit	C	4Fe-4S dicluster domain	asrA	-	asrA	220341.16503762	3.18e-266	727.0	COG0479@1|root,COG0479@2|Bacteria,1QVWG@1224|Proteobacteria,1RNMQ@1236|Gammaproteobacteria,3ZKI5@590|Salmonella	1236|Gammaproteobacteria
g723	glxR	;glxR	Tartronate semialdehyde reductase;2-hydroxy-3-oxopropionate reductase;3-hydroxyisobutyrate dehydrogenase	hit	I	Catalyzes the reduction of tatronate semialdehyde to D- glycerate	-	-	glxR	220341.16501788	1.65e-192	537.0	COG2084@1|root,COG2084@2|Bacteria,1MUGU@1224|Proteobacteria,1SYGG@1236|Gammaproteobacteria,3ZK3D@590|Salmonella	1236|Gammaproteobacteria
g724	group_2632	;aslB	Anaerobic sulfatase maturase;Chondro-6-sulfatase;anaerobic sulfatase maturase	hit	C	Iron-sulfur cluster-binding domain	-	-	group_2632	90371.CY43_06550	3.16e-301	820.0	COG0641@1|root,COG0641@2|Bacteria,1MX3M@1224|Proteobacteria,1RN4R@1236|Gammaproteobacteria,3ZJBA@590|Salmonella	1236|Gammaproteobacteria
g725	group_2629	;menH	Proline iminopeptidase;hypothetical protein;Hydrolase or acyltransferase;hydrolase	hit	I	Alpha/beta hydrolase family	-	-	group_2629	90371.CY43_07020	3.37e-220	606.0	COG2267@1|root,COG2267@2|Bacteria,1Q3PZ@1224|Proteobacteria,1RRIE@1236|Gammaproteobacteria,3ZMUQ@590|Salmonella	1236|Gammaproteobacteria
g726	yfcF	;yfcF	GST N-terminal domain-containing protein;GST-C-4 domain-containing protein;glutathione transferase	hit	O	Glutathione S-transferase, C-terminal domain	yfcF	GO:0000302,GO:0003674,GO:0003824,GO:0004364,GO:0006950,GO:0006979,GO:0008150,GO:0009636,GO:0010035,GO:0016740,GO:0016765,GO:0042221,GO:0042493,GO:0042542,GO:0046677,GO:0050896,GO:1901700	yfcF	90371.CY43_12570	5.92e-150	422.0	COG0625@1|root,COG0625@2|Bacteria,1NX28@1224|Proteobacteria,1RQUP@1236|Gammaproteobacteria,3ZJJ9@590|Salmonella	1236|Gammaproteobacteria
g727	yihS	;yihS	Aldose-ketose isomerase YihS;AGE family epimerase/isomerase;N-acylglucosamine 2-epimerase;sulfoquinovose isomerase	hit	G	Catalyzes the isomerization of sulfoquinovose (SQ) to 6- deoxy-6-sulfo-D-fructose (SF)	yihS	GO:0003674,GO:0003824,GO:0005488,GO:0005515,GO:0006066,GO:0006082,GO:0006790,GO:0006793,GO:0006796,GO:0008150,GO:0008152,GO:0009056,GO:0009987,GO:0016054,GO:0016853,GO:0016860,GO:0016861,GO:0019637,GO:0034308,GO:0042180,GO:0042802,GO:0044237,GO:0044248,GO:0044273,GO:0044281,GO:0044282,GO:0050089,GO:0061593,GO:0061720,GO:0071704,GO:1901135,GO:1901136,GO:1901575,GO:1901615,GO:1902776,GO:1902777	yihS	90371.CY43_21015	0.0	878.0	COG2942@1|root,COG2942@2|Bacteria,1MX1J@1224|Proteobacteria,1RSCF@1236|Gammaproteobacteria,3ZJ4G@590|Salmonella	1236|Gammaproteobacteria
g728	group_2624		hypothetical protein;Acetyl-CoA:acetoacetyl-CoA transferase subunit beta;CoA-transferase;propionate CoA-transferase;acyl CoA:acetate/3-ketoacid CoA transferase	hit	I	CoA transferase having broad substrate specificity for short-chain acyl-CoA thioesters with the activity decreasing when the length of the carboxylic acid chain exceeds four carbons	ydiF	-	group_2624	469008.B21_04035	0.0	929.0	COG4670@1|root,COG4670@2|Bacteria,1MUJW@1224|Proteobacteria,1RP80@1236|Gammaproteobacteria,3XN8Y@561|Escherichia	1236|Gammaproteobacteria
g729	ssaQ	ssaQ;	SPI-2 type III secretion system cytoplasmic ring protein SsaQ;hypothetical protein;YscQ/HrcQ family type III secretion apparatus protein	hit	NU	Type III flagellar switch regulator (C-ring) FliN C-term	ssaQ	-	ssaQ	220341.16502789	2.03e-237	652.0	COG1886@1|root,COG1886@2|Bacteria,1RDN0@1224|Proteobacteria,1S55X@1236|Gammaproteobacteria,3ZN3Q@590|Salmonella	1236|Gammaproteobacteria
g730	nrdR	nrdR	transcriptional regulator NrdR	hit	K	Negatively regulates transcription of bacterial ribonucleotide reductase nrd genes and operons by binding to NrdR- boxes	nrdR	GO:0000166,GO:0003674,GO:0003676,GO:0003677,GO:0003690,GO:0005488,GO:0005524,GO:0006355,GO:0008144,GO:0008150,GO:0009889,GO:0009890,GO:0009892,GO:0010468,GO:0010556,GO:0010558,GO:0010605,GO:0010629,GO:0017076,GO:0019219,GO:0019222,GO:0030554,GO:0031323,GO:0031324,GO:0031326,GO:0031327,GO:0032553,GO:0032555,GO:0032559,GO:0035639,GO:0036094,GO:0043167,GO:0043168,GO:0045892,GO:0045934,GO:0048519,GO:…	nrdR	218493.SBG_0368	5.33e-103	298.0	COG1327@1|root,COG1327@2|Bacteria,1RE7V@1224|Proteobacteria,1S3P9@1236|Gammaproteobacteria,3ZMBZ@590|Salmonella	1236|Gammaproteobacteria
g731	rplI	rplI	50S ribosomal protein L9	hit	J	binds to the 23S rRNA	rplI	GO:0003674,GO:0003676,GO:0003723,GO:0003735,GO:0005198,GO:0005488,GO:0005575,GO:0005622,GO:0005623,GO:0005737,GO:0005829,GO:0005840,GO:0006412,GO:0006518,GO:0006807,GO:0008150,GO:0008152,GO:0009058,GO:0009059,GO:0009987,GO:0010467,GO:0015934,GO:0019538,GO:0019843,GO:0022625,GO:0022626,GO:0032991,GO:0034641,GO:0034645,GO:0043043,GO:0043170,GO:0043226,GO:0043228,GO:0043229,GO:0043232,GO:0043603,GO:…	rplI	1197719.A464_4401	2.63e-94	276.0	COG0359@1|root,COG0359@2|Bacteria,1RD0R@1224|Proteobacteria,1S3WS@1236|Gammaproteobacteria,3ZJUY@590|Salmonella	1236|Gammaproteobacteria
g732	group_2619	fldA	flavodoxin	hit	C	Flavodoxin	yqcA	GO:0000166,GO:0003674,GO:0005488,GO:0010181,GO:0032553,GO:0036094,GO:0043167,GO:0043168,GO:0048037,GO:0050662,GO:0097159,GO:0097367,GO:1901265,GO:1901363	group_2619	90371.CY43_15460	1.16e-106	307.0	COG0716@1|root,COG0716@2|Bacteria,1N27T@1224|Proteobacteria,1S906@1236|Gammaproteobacteria,3ZKBB@590|Salmonella	1236|Gammaproteobacteria
g733	napB	napB	nitrate reductase cytochrome c-type subunit	hit	C	Electron transfer subunit of the periplasmic nitrate reductase complex NapAB	napB	GO:0006091,GO:0008150,GO:0008152,GO:0009061,GO:0009987,GO:0015980,GO:0044237,GO:0045333,GO:0055114	napB	220341.16503483	1.47e-109	314.0	COG3043@1|root,COG3043@2|Bacteria,1RHGD@1224|Proteobacteria,1S84V@1236|Gammaproteobacteria,3ZKCB@590|Salmonella	1236|Gammaproteobacteria
g734	kbp	kbp	potassium binding protein Kbp	hit	S	BON domain	ygaU	GO:0003674,GO:0005488,GO:0008150,GO:0010035,GO:0010038,GO:0030955,GO:0031420,GO:0035864,GO:0042221,GO:0043167,GO:0043169,GO:0046872,GO:0050896	kbp	90371.CY43_14610	1.26e-101	294.0	COG1652@1|root,COG1652@2|Bacteria,1RD8K@1224|Proteobacteria,1S4CB@1236|Gammaproteobacteria,3ZKYG@590|Salmonella	1236|Gammaproteobacteria
g735	btuD	btuD	vitamin B12 ABC transporter ATP-binding protein BtuD	hit	H	Part of the ABC transporter complex BtuCDF involved in vitamin B12 import. Responsible for energy coupling to the transport system	btuD	GO:0000166,GO:0003674,GO:0003824,GO:0005215,GO:0005488,GO:0005524,GO:0005575,GO:0005623,GO:0005886,GO:0006810,GO:0006855,GO:0008144,GO:0008150,GO:0015238,GO:0015399,GO:0015405,GO:0015420,GO:0015889,GO:0015893,GO:0016020,GO:0016021,GO:0016462,GO:0016787,GO:0016817,GO:0016818,GO:0016887,GO:0017076,GO:0017111,GO:0019898,GO:0022804,GO:0022857,GO:0030554,GO:0031224,GO:0032553,GO:0032555,GO:0032559,GO:…	btuD	220341.16502848	1.36e-158	447.0	COG4138@1|root,COG4138@2|Bacteria,1NXS9@1224|Proteobacteria,1RRMD@1236|Gammaproteobacteria,3ZK9G@590|Salmonella	1236|Gammaproteobacteria
g736	ghrB	;ghrB	hypothetical protein;Glyoxylate/hydroxypyruvate reductase B;glyoxylate/hydroxypyruvate reductase GhrB	hit	C	Catalyzes the NADPH-dependent reduction of glyoxylate and hydroxypyruvate into glycolate and glycerate, respectively	ghrB	GO:0003674,GO:0003824,GO:0005575,GO:0005622,GO:0005623,GO:0005737,GO:0005829,GO:0005975,GO:0006082,GO:0008150,GO:0008152,GO:0008873,GO:0008875,GO:0009056,GO:0009987,GO:0016052,GO:0016054,GO:0016491,GO:0016614,GO:0016616,GO:0016618,GO:0019520,GO:0019522,GO:0019752,GO:0030267,GO:0032787,GO:0043436,GO:0044237,GO:0044238,GO:0044248,GO:0044262,GO:0044275,GO:0044281,GO:0044282,GO:0044424,GO:0044444,GO:…	ghrB	220341.16504968	6.1e-226	623.0	COG1052@1|root,COG1052@2|Bacteria,1MU2D@1224|Proteobacteria,1RMGZ@1236|Gammaproteobacteria,3ZJ9F@590|Salmonella	1236|Gammaproteobacteria
g737	group_2617	;torA	Biotin sulfoxide reductase;trimethylamine-N-oxide reductase TorA	hit	C	Molydopterin dinucleotide binding domain	bisC	GO:0003674,GO:0003824,GO:0005488,GO:0008150,GO:0008152,GO:0016491,GO:0016667,GO:0016671,GO:0030151,GO:0033744,GO:0043167,GO:0043169,GO:0046872,GO:0046914,GO:0055114	group_2617	220341.16504970	0.0	1621.0	COG0243@1|root,COG0243@2|Bacteria,1NR6J@1224|Proteobacteria,1RMVE@1236|Gammaproteobacteria,3ZJUF@590|Salmonella	1236|Gammaproteobacteria
g738	creA	creA	protein CreA	hit	S	CreA protein	creA	GO:0005575,GO:0005622,GO:0005623,GO:0005737,GO:0005829,GO:0044424,GO:0044444,GO:0044464	creA	220341.16505686	1.84e-106	307.0	COG3045@1|root,COG3045@2|Bacteria,1RDMP@1224|Proteobacteria,1S29X@1236|Gammaproteobacteria,3ZJBZ@590|Salmonella	1236|Gammaproteobacteria
g739	lysX	;lysX	hypothetical protein;Sugar-transfer associated ATP-grasp	hit	HJ	ligase activity	-	-	lysX	90371.CY43_20980	3.27e-133	384.0	COG0189@1|root,COG0189@2|Bacteria,1RKAX@1224|Proteobacteria,1S9MT@1236|Gammaproteobacteria,3ZN7Y@590|Salmonella	1236|Gammaproteobacteria
g740	ompL	ompL	porin OmpL	hit	M	Oligogalacturonate-specific porin protein (KdgM)	ompL	GO:0003674,GO:0005215,GO:0005575,GO:0005623,GO:0006810,GO:0008150,GO:0008643,GO:0008645,GO:0009279,GO:0015267,GO:0015288,GO:0015749,GO:0015750,GO:0015751,GO:0015757,GO:0016020,GO:0019867,GO:0022803,GO:0022829,GO:0022857,GO:0030312,GO:0030313,GO:0031975,GO:0034219,GO:0044462,GO:0044464,GO:0046323,GO:0051179,GO:0051234,GO:0055085,GO:0071702,GO:0071944,GO:1904659	ompL	1197719.A464_4057	5.89e-173	482.0	COG1452@1|root,COG1452@2|Bacteria,1R4ZS@1224|Proteobacteria,1RQHC@1236|Gammaproteobacteria,3ZKMS@590|Salmonella	1236|Gammaproteobacteria
g741	group_2614		Aldo/keto reductase;aldo/keto reductase;hypothetical protein	hit	C	Aldo/keto reductase family	yccK	-	group_2614	220341.16501423	2.63e-240	660.0	COG0667@1|root,COG0667@2|Bacteria,1MVEH@1224|Proteobacteria,1RPX5@1236|Gammaproteobacteria,3ZJ2S@590|Salmonella	1236|Gammaproteobacteria
g742	ttrA	;ttrA	Tetrathionate reductase subunit A;tetrathionate reductase subunit TtrA	hit	C	Molybdopterin oxidoreductase Fe4S4 domain	ttrA	-	ttrA	90371.CY43_07035	0.0	2058.0	COG0243@1|root,COG0243@2|Bacteria,1P01N@1224|Proteobacteria,1RQK9@1236|Gammaproteobacteria,3ZK3M@590|Salmonella	1236|Gammaproteobacteria
g743	gntT~~~idnT	;gntT;idnT	High-affinity gluconate transporter GntT;H+/gluconate symporter GntT or related permease GntP/DsdX family;gnt-II system L-idonate transporter	hit	EG	GntP family permease	idnT	GO:0003674,GO:0005215,GO:0005342,GO:0005575,GO:0005623,GO:0005886,GO:0005887,GO:0006810,GO:0006811,GO:0006820,GO:0008028,GO:0008150,GO:0008509,GO:0008514,GO:0008643,GO:0015075,GO:0015128,GO:0015144,GO:0015318,GO:0015568,GO:0015711,GO:0015718,GO:0015726,GO:0015849,GO:0016020,GO:0016021,GO:0022857,GO:0031224,GO:0031226,GO:0034219,GO:0034220,GO:0035429,GO:0042873,GO:0042879,GO:0044425,GO:0044459,GO:…	gntT~~~idnT	90371.CY43_23340	9.73e-294	804.0	COG2610@1|root,COG2610@2|Bacteria,1MUFG@1224|Proteobacteria,1RNGE@1236|Gammaproteobacteria,3ZITR@590|Salmonella	1236|Gammaproteobacteria
g744	draG	;draG	ADP-ribosylglycohydrolase family protein;Putative ADP-ribosylglycohydrolase;ADP-ribosylglycohydrolase	hit	O	ADP-ribosylglycohydrolase	-	-	draG	220341.16504670	4.09e-248	681.0	COG1397@1|root,COG1397@2|Bacteria,1R5NX@1224|Proteobacteria,1RYKA@1236|Gammaproteobacteria,3ZN71@590|Salmonella	1236|Gammaproteobacteria
g745	wzzE	;wzzE	Lipopolysaccharide biosynthesis protein wzzE;Lipopolysaccharide biosynthesis protein;ECA polysaccharide chain length modulation protein;Lipopolysaccharide biosynthesis protein WzzE	hit	M	Modulates the polysaccharide chain length of enterobacterial common antigen (ECA)	wzzE	GO:0000271,GO:0003674,GO:0005488,GO:0005515,GO:0005975,GO:0005976,GO:0008150,GO:0008152,GO:0009058,GO:0009059,GO:0009246,GO:0009987,GO:0016051,GO:0033692,GO:0034637,GO:0034645,GO:0042802,GO:0043170,GO:0044237,GO:0044238,GO:0044249,GO:0044260,GO:0044262,GO:0044264,GO:0046378,GO:0071704,GO:1901135,GO:1901137,GO:1901576	wzzE	90371.CY43_20520	1.43e-249	685.0	COG3765@1|root,COG3765@2|Bacteria,1MW70@1224|Proteobacteria,1RRBS@1236|Gammaproteobacteria,3ZKSK@590|Salmonella	1236|Gammaproteobacteria
g746	hemW	;hemW	HemN-C domain-containing protein;radical SAM family heme chaperone HemW	hit	H	Involved in the biosynthesis of porphyrin-containing compound	yggW	GO:0003674,GO:0005488,GO:0005575,GO:0005622,GO:0005623,GO:0005737,GO:0006725,GO:0006778,GO:0006779,GO:0006807,GO:0008150,GO:0008152,GO:0009058,GO:0009987,GO:0018130,GO:0019438,GO:0033013,GO:0033014,GO:0034641,GO:0044237,GO:0044249,GO:0044271,GO:0044424,GO:0044464,GO:0046483,GO:0048037,GO:0051186,GO:0051188,GO:0051536,GO:0051539,GO:0051540,GO:0071704,GO:1901360,GO:1901362,GO:1901564,GO:1901566,GO:…	hemW	220341.16504181	3.59e-286	780.0	COG0635@1|root,COG0635@2|Bacteria,1MU76@1224|Proteobacteria,1RN6I@1236|Gammaproteobacteria,3ZK8R@590|Salmonella	1236|Gammaproteobacteria
g747	ansB	ansB;	L-asparaginase 2;L-asparaginase	hit	EJ	Asparaginase, N-terminal	ansB	GO:0003674,GO:0003824,GO:0004067,GO:0005488,GO:0005515,GO:0005575,GO:0005622,GO:0005623,GO:0005737,GO:0005829,GO:0006082,GO:0006520,GO:0006528,GO:0006530,GO:0006807,GO:0008150,GO:0008152,GO:0009056,GO:0009063,GO:0009064,GO:0009065,GO:0009066,GO:0009068,GO:0009987,GO:0016043,GO:0016054,GO:0016787,GO:0016810,GO:0016811,GO:0019752,GO:0022607,GO:0030288,GO:0030313,GO:0031975,GO:0032787,GO:0034641,GO:…	ansB	220341.16504183	1.12e-246	677.0	COG0252@1|root,COG0252@2|Bacteria,1MWIR@1224|Proteobacteria,1RNPN@1236|Gammaproteobacteria,3ZIWH@590|Salmonella	1236|Gammaproteobacteria
g748	mltB	mltB	lytic murein transglycosylase B	hit	M	Transglycosylase SLT domain	mltB	GO:0000270,GO:0003674,GO:0003824,GO:0005488,GO:0005509,GO:0005575,GO:0005623,GO:0006022,GO:0006026,GO:0006027,GO:0006807,GO:0008150,GO:0008152,GO:0008932,GO:0008933,GO:0009056,GO:0009057,GO:0009253,GO:0009279,GO:0016020,GO:0016740,GO:0016757,GO:0019867,GO:0030203,GO:0030288,GO:0030312,GO:0030313,GO:0031402,GO:0031420,GO:0031975,GO:0042597,GO:0043167,GO:0043169,GO:0043170,GO:0044462,GO:0044464,GO:…	mltB	220341.16503908	3.09e-270	738.0	COG2951@1|root,COG2951@2|Bacteria,1MUZ3@1224|Proteobacteria,1RMQ6@1236|Gammaproteobacteria,3ZKKJ@590|Salmonella	1236|Gammaproteobacteria
g749	phnR	;phnR	Transcriptional regulator;phosphonate utilization transcriptional regulator PhnR	hit	K	UTRA domain	phnR	-	phnR	220341.16501698	4.86e-175	487.0	COG2188@1|root,COG2188@2|Bacteria,1R4PN@1224|Proteobacteria,1RQ87@1236|Gammaproteobacteria,3ZN1F@590|Salmonella	1236|Gammaproteobacteria
g750	adrA	adrA;	diguanylate cyclase AdrA;Putative signal transduction protein	hit	T	MASE2 domain	adrA	GO:0003674,GO:0003824,GO:0016740,GO:0016772,GO:0016779,GO:0052621	adrA	90371.CY43_02250	4.54e-264	723.0	COG2199@1|root,COG3706@2|Bacteria,1MZV7@1224|Proteobacteria,1RPR0@1236|Gammaproteobacteria,3ZJVQ@590|Salmonella	1236|Gammaproteobacteria
g751	ramA	;ramA	helix-turn-helix domain-containing protein;hypothetical protein;RamA family antibiotic efflux transcriptional regulator	hit	K	Helix-turn-helix domain	ramA	-	ramA	90371.CY43_03190	7.58e-79	234.0	COG2207@1|root,COG2207@2|Bacteria,1RDV8@1224|Proteobacteria,1S3QC@1236|Gammaproteobacteria,3ZM9P@590|Salmonella	1236|Gammaproteobacteria
g752	yciW1	;yciW1	hypothetical protein;Putative cytoplasmic protein;N-terminal domain of uncharacterized protein YciW (function unknown);CMD domain-containing protein;cytoplasmic protein	hit	S	protein conserved in bacteria	yciW	-	yciW1	220341.16502474	3.95e-210	585.0	COG4950@1|root,COG4950@2|Bacteria,1PBP5@1224|Proteobacteria,1RN1H@1236|Gammaproteobacteria,3ZM4R@590|Salmonella	1236|Gammaproteobacteria
g753	group_2600		hypothetical protein	hit	S	peptidyl-tyrosine sulfation	-	-	group_2600	220341.16502397	7.26e-304	830.0	COG0457@1|root,33WI6@2|Bacteria,1NWNX@1224|Proteobacteria,1SPF1@1236|Gammaproteobacteria,3ZMYC@590|Salmonella	1236|Gammaproteobacteria
g754	torS	;torS	Histidine kinase;TMAO reductase system sensor histidine kinase/response regulator TorS	hit	T	Histidine Phosphotransfer domain	torS	GO:0000155,GO:0000160,GO:0003674,GO:0003824,GO:0004672,GO:0004673,GO:0004721,GO:0005488,GO:0005515,GO:0005575,GO:0005623,GO:0005886,GO:0006091,GO:0006464,GO:0006468,GO:0006470,GO:0006793,GO:0006796,GO:0006807,GO:0007154,GO:0007165,GO:0008150,GO:0008152,GO:0009061,GO:0009987,GO:0010033,GO:0015980,GO:0016020,GO:0016301,GO:0016310,GO:0016311,GO:0016740,GO:0016772,GO:0016773,GO:0016775,GO:0016787,GO:…	torS	90371.CY43_19855	0.0	1698.0	COG0642@1|root,COG0784@1|root,COG2198@1|root,COG0784@2|Bacteria,COG2198@2|Bacteria,COG2205@2|Bacteria,1NRP8@1224|Proteobacteria,1SKTW@1236|Gammaproteobacteria,3ZIT7@590|Salmonella	1236|Gammaproteobacteria
g755	glf	;glf	UDP-galactopyranose mutase;hypothetical protein	hit	M	UDP-galactopyranose mutase	glf	GO:0000166,GO:0003674,GO:0003824,GO:0005488,GO:0005575,GO:0005622,GO:0005623,GO:0005737,GO:0005829,GO:0008767,GO:0016853,GO:0016866,GO:0036094,GO:0043167,GO:0043168,GO:0044424,GO:0044444,GO:0044464,GO:0048037,GO:0050660,GO:0050662,GO:0097159,GO:1901265,GO:1901363	glf	90371.CY43_03890	5.11e-288	785.0	COG0562@1|root,COG0562@2|Bacteria,1MV4H@1224|Proteobacteria,1RPMY@1236|Gammaproteobacteria,3ZMVN@590|Salmonella	1236|Gammaproteobacteria
g756	matP	matP	macrodomain Ter protein MatP	hit	D	Required for spatial organization of the terminus region of the chromosome (Ter macrodomain) during the cell cycle. Prevents early segregation of duplicated Ter macrodomains during cell division. Binds specifically to matS, which is a 13 bp signature motif repeated within the Ter macrodomain	matP	GO:0003674,GO:0003676,GO:0003677,GO:0005488,GO:0005575,GO:0005622,GO:0005623,GO:0005694,GO:0006996,GO:0007059,GO:0008150,GO:0009987,GO:0016043,GO:0032991,GO:0032993,GO:0043226,GO:0043228,GO:0043229,GO:0043232,GO:0043565,GO:0044422,GO:0044424,GO:0044427,GO:0044446,GO:0044464,GO:0051276,GO:0051301,GO:0071840,GO:0097047,GO:0097159,GO:1901363	matP	90371.CY43_05470	3.2e-100	291.0	COG3120@1|root,COG3120@2|Bacteria,1RA57@1224|Proteobacteria,1S28S@1236|Gammaproteobacteria,3ZKQI@590|Salmonella	1236|Gammaproteobacteria
g757	ybbJ	ybbJ	NfeD-like C-terminal partner-binding	hit	OU	NfeD-like C-terminal, partner-binding	ybbJ	GO:0005575,GO:0005623,GO:0005886,GO:0016020,GO:0044464,GO:0071944	ybbJ	220341.16501770	4.92e-104	300.0	COG1585@1|root,COG1585@2|Bacteria,1N241@1224|Proteobacteria,1S5W4@1236|Gammaproteobacteria,3ZKH2@590|Salmonella	1236|Gammaproteobacteria
g758	moaE	moaE	molybdopterin synthase catalytic subunit MoaE	hit	H	MoaE protein	moaE	GO:0003674,GO:0003824,GO:0005575,GO:0005622,GO:0005623,GO:0005737,GO:0005829,GO:0006139,GO:0006163,GO:0006725,GO:0006732,GO:0006753,GO:0006777,GO:0006793,GO:0006796,GO:0006807,GO:0008150,GO:0008152,GO:0009058,GO:0009108,GO:0009116,GO:0009117,GO:0009119,GO:0009141,GO:0009144,GO:0009150,GO:0009199,GO:0009205,GO:0009259,GO:0009987,GO:0016740,GO:0016782,GO:0016783,GO:0018130,GO:0019538,GO:0019637,GO:…	moaE	220341.16502023	1.25e-106	307.0	COG0314@1|root,COG0314@2|Bacteria,1RGUX@1224|Proteobacteria,1S5YH@1236|Gammaproteobacteria,3ZJ05@590|Salmonella	1236|Gammaproteobacteria
g759	sfp	sfp	Putative phosphopantetheinyl transferase	hit	H	Phosphopantetheinyl transferase	yieE	GO:0003674,GO:0003824,GO:0006082,GO:0006520,GO:0006553,GO:0006807,GO:0008150,GO:0008152,GO:0008652,GO:0008897,GO:0009058,GO:0009066,GO:0009067,GO:0009085,GO:0009987,GO:0016053,GO:0016740,GO:0016772,GO:0016780,GO:0019752,GO:0019878,GO:0043436,GO:0044237,GO:0044238,GO:0044249,GO:0044281,GO:0044283,GO:0046394,GO:0071704,GO:1901564,GO:1901566,GO:1901576,GO:1901605,GO:1901607	sfp	220341.16504785	1.58e-181	505.0	COG2091@1|root,COG2091@2|Bacteria,1PH34@1224|Proteobacteria,1RP3Q@1236|Gammaproteobacteria,3ZK3N@590|Salmonella	1236|Gammaproteobacteria
g760	group_2595	;narK	hypothetical protein;Permease;MFS transporter	hit	P	Major facilitator superfamily	-	-	group_2595	220341.16503786	1.49e-274	752.0	COG2223@1|root,COG2223@2|Bacteria,1MWC7@1224|Proteobacteria,1RY1W@1236|Gammaproteobacteria	1236|Gammaproteobacteria
g761	fur	fur	ferric iron uptake transcriptional regulator	hit	K	Ferric uptake regulator family	fur	GO:0000976,GO:0001067,GO:0001130,GO:0001216,GO:0001217,GO:0003674,GO:0003676,GO:0003677,GO:0003690,GO:0003700,GO:0005488,GO:0005575,GO:0005622,GO:0005623,GO:0005737,GO:0005829,GO:0006355,GO:0008150,GO:0008270,GO:0009889,GO:0009890,GO:0009891,GO:0009892,GO:0009893,GO:0010468,GO:0010556,GO:0010557,GO:0010558,GO:0010604,GO:0010605,GO:0010628,GO:0010629,GO:0019219,GO:0019222,GO:0031323,GO:0031324,GO:…	fur	220341.16501929	5.32e-108	310.0	COG0735@1|root,COG0735@2|Bacteria,1RDWJ@1224|Proteobacteria,1S4H7@1236|Gammaproteobacteria,3ZKA9@590|Salmonella	1236|Gammaproteobacteria
g762	group_2591	;fucP	Transport protein/putative regulator;Fucose permease;MFS transporter	hit	G	Major Facilitator Superfamily	ybjJ	GO:0005575,GO:0005623,GO:0005886,GO:0016020,GO:0044464,GO:0071944	group_2591	90371.CY43_04650	3.9e-268	736.0	COG0738@1|root,COG0738@2|Bacteria,1MVR9@1224|Proteobacteria,1RNEI@1236|Gammaproteobacteria,3ZKZZ@590|Salmonella	1236|Gammaproteobacteria
g763	mdtG	mdtG;	multidrug efflux MFS transporter MdtG;Membrane transport protein;Multidrug-efflux transporter major facilitator superfamily (MFS)	hit	U	MFS_1 like family	mdtG	GO:0006810,GO:0006855,GO:0008150,GO:0015893,GO:0042221,GO:0042493,GO:0050896,GO:0051179,GO:0051234,GO:0055085	mdtG	220341.16502325	3.86e-280	767.0	COG0477@1|root,COG2814@2|Bacteria,1MUBP@1224|Proteobacteria,1RNXS@1236|Gammaproteobacteria,3ZJYZ@590|Salmonella	1236|Gammaproteobacteria
g764	group_2590	trmJ;	tRNA (cytosine(32)/uridine(32)-2'-O)-methyltransferase TrmJ;hypothetical protein	hit	J	Catalyzes the formation of 2'O-methylated cytidine (Cm32) or 2'O-methylated uridine (Um32) at position 32 in tRNA	trmJ	GO:0001510,GO:0002128,GO:0003674,GO:0003824,GO:0005575,GO:0005622,GO:0005623,GO:0005737,GO:0005829,GO:0006139,GO:0006396,GO:0006399,GO:0006400,GO:0006725,GO:0006807,GO:0008033,GO:0008150,GO:0008152,GO:0008168,GO:0008173,GO:0008175,GO:0008757,GO:0009451,GO:0009987,GO:0010467,GO:0016070,GO:0016300,GO:0016427,GO:0016740,GO:0016741,GO:0030488,GO:0032259,GO:0034470,GO:0034641,GO:0034660,GO:0043170,GO:…	group_2590	220341.16503759	1.28e-172	481.0	COG0565@1|root,COG0565@2|Bacteria,1N47Y@1224|Proteobacteria,1RPD3@1236|Gammaproteobacteria,3ZJQ0@590|Salmonella	1236|Gammaproteobacteria
g765	group_2589	argF	ornithine carbamoyltransferase	hit	E	Reversibly catalyzes the transfer of the carbamoyl group from carbamoyl phosphate (CP) to the N(epsilon) atom of ornithine (ORN) to produce L-citrulline	argI	GO:0000050,GO:0003674,GO:0003824,GO:0004585,GO:0005575,GO:0005622,GO:0005623,GO:0005737,GO:0006082,GO:0006520,GO:0006525,GO:0006526,GO:0006591,GO:0006807,GO:0008150,GO:0008152,GO:0008652,GO:0009058,GO:0009064,GO:0009084,GO:0009987,GO:0016053,GO:0016740,GO:0016741,GO:0016743,GO:0019627,GO:0019752,GO:0034641,GO:0042450,GO:0043436,GO:0043603,GO:0043604,GO:0044237,GO:0044238,GO:0044249,GO:0044271,GO:…	group_2589	90371.CY43_23275	3.19e-239	657.0	COG0078@1|root,COG0078@2|Bacteria,1MUFM@1224|Proteobacteria,1RQ59@1236|Gammaproteobacteria,3ZJB2@590|Salmonella	1236|Gammaproteobacteria
g766	astD	astD	succinylglutamate-semialdehyde dehydrogenase	hit	C	Catalyzes the NAD-dependent reduction of succinylglutamate semialdehyde into succinylglutamate	astD	GO:0003674,GO:0003824,GO:0004029,GO:0006082,GO:0006520,GO:0006525,GO:0006527,GO:0006807,GO:0008150,GO:0008152,GO:0009056,GO:0009063,GO:0009064,GO:0009065,GO:0009987,GO:0016054,GO:0016491,GO:0016620,GO:0016903,GO:0019752,GO:0043436,GO:0044237,GO:0044238,GO:0044248,GO:0044281,GO:0044282,GO:0046395,GO:0055114,GO:0071704,GO:1901564,GO:1901565,GO:1901575,GO:1901605,GO:1901606	astD	90371.CY43_06645	0.0	974.0	COG1012@1|root,COG1012@2|Bacteria,1MV2I@1224|Proteobacteria,1RPQW@1236|Gammaproteobacteria,3ZKJQ@590|Salmonella	1236|Gammaproteobacteria
g767	astC	astC	Succinylornithine transaminase	hit	E	Catalyzes the transamination of N(2)-succinylornithine and alpha-ketoglutarate into N(2)-succinylglutamate semialdehyde and glutamate. Can also act as an acetylornithine aminotransferase	argD	GO:0003674,GO:0003824,GO:0003992,GO:0004069,GO:0005488,GO:0005515,GO:0006082,GO:0006105,GO:0006520,GO:0006525,GO:0006526,GO:0006527,GO:0006591,GO:0006593,GO:0006807,GO:0008144,GO:0008150,GO:0008152,GO:0008483,GO:0008652,GO:0009056,GO:0009058,GO:0009063,GO:0009064,GO:0009065,GO:0009084,GO:0009987,GO:0016053,GO:0016054,GO:0016740,GO:0016769,GO:0017144,GO:0019545,GO:0019752,GO:0019842,GO:0030170,GO:…	astC	220341.16502888	1.15e-299	816.0	COG4992@1|root,COG4992@2|Bacteria,1MV3C@1224|Proteobacteria,1RMV1@1236|Gammaproteobacteria,3ZKNQ@590|Salmonella	1236|Gammaproteobacteria
g768	phoE	;phoE	porin;Outer membrane phosphoporin protein E;phosphoporin PhoE	hit	M	Belongs to the Gram-negative porin family	phoE	GO:0005575,GO:0005622,GO:0005623,GO:0005737,GO:0005829,GO:0006355,GO:0008150,GO:0009279,GO:0009889,GO:0009891,GO:0009893,GO:0010468,GO:0010556,GO:0010557,GO:0010604,GO:0010628,GO:0016020,GO:0016021,GO:0019219,GO:0019222,GO:0019867,GO:0030312,GO:0030313,GO:0031224,GO:0031323,GO:0031325,GO:0031326,GO:0031328,GO:0031975,GO:0032991,GO:0044424,GO:0044425,GO:0044444,GO:0044462,GO:0044464,GO:0045893,GO:…	phoE	220341.16501606	3.55e-256	702.0	COG3203@1|root,COG3203@2|Bacteria,1MVRY@1224|Proteobacteria,1RNBS@1236|Gammaproteobacteria,3ZMRV@590|Salmonella	1236|Gammaproteobacteria
g769	ispB	ispB	octaprenyl diphosphate synthase	hit	H	Polyprenyl synthetase	ispB	GO:0003674,GO:0003824,GO:0004659,GO:0005488,GO:0005515,GO:0005575,GO:0005622,GO:0005623,GO:0005737,GO:0005829,GO:0006066,GO:0006629,GO:0006720,GO:0006732,GO:0006733,GO:0006743,GO:0006744,GO:0008150,GO:0008152,GO:0008299,GO:0008610,GO:0009058,GO:0009108,GO:0009987,GO:0016093,GO:0016094,GO:0016740,GO:0016765,GO:0042180,GO:0042181,GO:0042802,GO:0044237,GO:0044238,GO:0044249,GO:0044255,GO:0044281,GO:…	ispB	1197719.A464_3386	3.94e-262	719.0	COG0142@1|root,COG0142@2|Bacteria,1MUK6@1224|Proteobacteria,1RPR7@1236|Gammaproteobacteria,3ZKUX@590|Salmonella	1236|Gammaproteobacteria
g770	sufE	;sufE	Cysteine desufuration protein SufE;cysteine desulfuration protein SufE	hit	S	Participates in cysteine desulfuration mediated by SufS. Cysteine desulfuration mobilizes sulfur from L-cysteine to yield L-alanine and constitutes an essential step in sulfur metabolism for biosynthesis of a variety of sulfur-containing biomolecules. Functions as a sulfur acceptor for SufS, by mediating the direct transfer of the sulfur atom from the S-sulfanylcysteine of SufS, an intermediate p…	sufE	GO:0003674,GO:0006464,GO:0006790,GO:0006807,GO:0006950,GO:0006979,GO:0008047,GO:0008150,GO:0008152,GO:0009987,GO:0016043,GO:0019538,GO:0022607,GO:0030234,GO:0031162,GO:0031163,GO:0036211,GO:0043085,GO:0043170,GO:0043412,GO:0044085,GO:0044093,GO:0044237,GO:0044238,GO:0044260,GO:0044267,GO:0050790,GO:0050896,GO:0065007,GO:0065009,GO:0071704,GO:0071840,GO:0097163,GO:0098772,GO:0140104,GO:1901564	sufE	220341.16502829	7.79e-93	271.0	COG2166@1|root,COG2166@2|Bacteria,1RI8F@1224|Proteobacteria,1S65C@1236|Gammaproteobacteria,3ZM8V@590|Salmonella	1236|Gammaproteobacteria
g771	group_2585	;frwB	PTS EIIC type-2 domain-containing protein;PTS system protein;fructose-specific PTS transporter subunit EIIC;PTS fructose transporter subunit IIB;fructose PTS transporter subunit IIB;PTS fructose transporter subunit IIC	hit	G	Phosphotransferase system, EIIC	-	-	group_2585	90371.CY43_16955	0.0	917.0	COG1299@1|root,COG1445@1|root,COG1299@2|Bacteria,COG1445@2|Bacteria,1PW52@1224|Proteobacteria,1RZEG@1236|Gammaproteobacteria,3ZN8C@590|Salmonella	1236|Gammaproteobacteria
g772	invA	;invA	Type III secretion system protein InvA;EscV/YscV/HrcV family type III secretion system export apparatus protein;type III secretion system export apparatus protein InvA	hit	U	FHIPEP family	invA	-	invA	220341.16503974	0.0	1248.0	COG4789@1|root,COG4789@2|Bacteria,1R346@1224|Proteobacteria,1T62Z@1236|Gammaproteobacteria,3ZK4W@590|Salmonella	1236|Gammaproteobacteria
g773	group_2579	pflB;	formate C-acetyltransferase;2-ketobutyrate formate-lyase / Pyruvate formate-lyase;Formate acetyltransferase;Formate acetyltransferase 3	hit	C	Pyruvate formate lyase-like	tdcE	GO:0003674,GO:0003824,GO:0005575,GO:0005622,GO:0005623,GO:0005737,GO:0006082,GO:0006520,GO:0006566,GO:0006567,GO:0006629,GO:0006631,GO:0006807,GO:0008150,GO:0008152,GO:0008861,GO:0009056,GO:0009063,GO:0009066,GO:0009068,GO:0009987,GO:0016020,GO:0016054,GO:0016407,GO:0016408,GO:0016453,GO:0016740,GO:0016746,GO:0016747,GO:0016999,GO:0017144,GO:0019541,GO:0019752,GO:0032787,GO:0042737,GO:0043436,GO:…	group_2579	90371.CY43_16890	0.0	1516.0	COG1882@1|root,COG1882@2|Bacteria,1MWYE@1224|Proteobacteria,1RWKK@1236|Gammaproteobacteria,3ZKHJ@590|Salmonella	1236|Gammaproteobacteria
g774	creD	;creD	Membrane protein;cell envelope integrity protein CreD	hit	V	Inner membrane protein CreD	creD	GO:0005575,GO:0005623,GO:0005886,GO:0016020,GO:0044464,GO:0071944	creD	220341.16505689	0.0	879.0	COG4452@1|root,COG4452@2|Bacteria,1MVVR@1224|Proteobacteria,1RQRZ@1236|Gammaproteobacteria,3ZMIZ@590|Salmonella	1236|Gammaproteobacteria
[truncated: 9,965 more rows]
