# Supplementary material for: Global population genomics of Salmonella enterica serotype Napoli, an emerging pathogen with an unusual epidemiologic pattern
Source: Research Square preprint supplement (doi:10.21203/rs.3.rs-8608855/v1), 2026-01-16
Supplement: Supplementary file 6 [file bbb27c996f0cbd6cfd56ddb9.xlsx]

## Sheet: Data 3
	Gene	Subject	Minimal % of identity between pan-genome CDS and Bacmet subject sequence	Match length between pan-genome CDS and Bacmet subject sequence	Length	Comment	% of the S. Napoli pan-genomes that contain this gene (n=1,191)	No of S. Napoli pan-genomes containing this gene	%coverage length in 1,191 S. Napoli pan-genomes	maximal % identity in 1,191 S. Napoli pan-genomes	Precent identity in complete genome
											Nap_90-23	16-174478	ISS_67-2-09	Nap85-16-14	Nap88103	Nap_ISS_133-3-03	Nap_ISS_61-2-17	Nap_ISS_61-4-17	Nap_S20154936	ISS_75_4_18	Nap202208589	Nap72	Nap82-7-10
BAC0088	corC	BAC0088|corC|sp|P0A2L3|CORC_SALTY	100	292	292		100	1191	100	100	100	100	100	100	100	100	100	100	100	100	100	100	100
BAC0290	ompD	BAC0290|opmD/nmpC|sp|P37592|OMPD_SALTY	100	362	362		99.7481	1188	100.255	100	100	100	100	99.724	100	100	100	99.451	100	100	100	100	100
BAC0349	sitA	BAC0349|sitA|tr|Q9XCS2|Q9XCS2_SALTI	100	305	305		100	1191	100	100	100	100	99.344	100	99.344	100	100	99.672	100	99.344	100	100	100
BAC0351	sitC	BAC0351|sitC|tr|Q9XCS0|Q9XCS0_SALTM	100	286	286		100	1191	100	100	100	100	99.65	100	99.65	100	100	100	100	99.65	100	100	100
BAC0435	yddG	BAC0435|yddg/emrE|sp|D0ZXP9|YDDG_SALT1	98.635	293	293		99.7481	1188	100	100	98.635	98.635	98.635	98.635	98.635	98.635	98.635	98.635	100	98.635	98.635	98.635	98.635
BAC0466	zraP	BAC0466|zraP|sp|Q9L9I0|ZRAP_SALTY	100	151	151		100	1191	99.093	100	100	100	100	100	100	100	99.338	100	100	100	100	100	100
BAC0596	baeR	BAC0596|baeR|tr|D0ZNE3|D0ZNE3_SALT1	100	240	240		99.8321	1189	100	100	100	100	100	100	100	100	100	100	100	99.583	100	100	99.583
BAC0641	corA	BAC0641|corA|sp|P0A2R8|CORA_SALTY	97.468	316	316		100	1191	100.333	100	100	100	100	100	100	100	99.684	100	100	100	100	100	100
BAC0644	apaG	BAC0644|corD|sp|Q56017|APAG_SALTY	100	125	125		100	1191	100	100	100	100	100	100	100	100	100	100	100	100	100	100	100
BAC0563	acrD	BAC0563|acrD|tr|Q8ZN77|Q8ZN77_SALTY	99.807	1037	1037		100	1191	100	99.807	99.807	99.807	99.807	99.807	99.807	99.807	99.711	99.807	99.807	99.807	99.807	99.711	99.711
BAC0647	mdtC	BAC0647|mdtC|tr|D0ZNE0|D0ZNE0_SALT1	99.61	1026	1026		99.8321	1189	100	99.61	99.513	99.61	99.415	99.61	99.513	99.415	99.415	99.513	99.61	99.513	99.513	99.61	99.61
BAC0106	cueO	BAC0106|cuiD|sp|Q8ZRS2|CUEO_SALTY	99.254	536	536		100	1191	102.679	99.44	99.254	99.44	99.067	99.44	99.254	99.44	99.254	99.44	99.254	99.254	99.44	99.254	99.44
BAC0352	sitD	BAC0352|sitD|tr|Q9XCR9|Q9XCR9_SALTM	99.291	282	282		100	1191	99.3232	99.291	99.291	99.291	98.936	99.291	98.936	99.291	99.291	99.291	99.291	98.936	99.291	99.288	98.936
BAC0645	mdtA	BAC0645|mdtA|tr|D0ZND8|D0ZND8_SALT1	99.274	413	413		99.8321	1189	100	99.274	99.274	99.274	99.031	99.274	99.274	98.789	99.031	99.274	99.274	99.274	99.274	99.274	99.274
BAC0350	sitB	BAC0350|sitB|tr|Q9XCS1|Q9XCS1_SALTM	99.267	273	273		100	1191	100	99.267	99.267	99.267	99.267	99.267	99.267	99.267	99.267	99.267	99.267	99.267	99.267	99.267	99.267
BAC0646	mdtB	BAC0646|mdtB|tr|D0ZND9|D0ZND9_SALT1	98.846	1040	1040		99.8321	1189	100	99.231	99.135	99.231	99.135	99.231	99.231	99.231	99.135	99.231	99.231	99.038	99.135	99.135	99.231
BAC0642	mgtA	BAC0642|mgtA|sp|P36640|ATMA_SALTY	98.895	905	902		100	1191	100	99.224	99.113	99.002	99.224	99.113	99.224	98.891	99.212	98.78	99.224	99.224	99.113	99.224	99.113
BAC0335	rpoS	BAC0335|rpoS|sp|P35540|RPOS_SHIFL	99.091	330	330		99.916	1190	100	99.091	99.091	99.091	99.091	99.091	99.091	99.091	99.091	99.091	99.091	99.091	99.091	99.091	99.091
BAC0367	smvA	BAC0367|smvA/emrB|sp|D0ZXQ3|SMVA_SALT1	98.99	495	495		99.8321	1189	100	98.99	98.99	98.99	98.99	98.99	98.788	98.99	98.788	98.99	98.99	98.99	97.785	98.99	98.99
BAC0597	baeS	BAC0597|baeS|tr|D0ZNE2|D0ZNE2_SALT1	98.715	467	467		99.8321	1189	100	98.929	98.929	98.929	98.929	98.715	98.715	98.929	98.715	98.929	98.929	98.929	98.929	98.929	98.929
BAC0104	cueP	BAC0104|cueP|tr|Q8ZL99|Q8ZL99_SALTY	98.883	179	179		100	1191	99.2593	98.883	98.883	98.883	97.765	98.883	98.883	98.324	98.883	98.883	98.883	98.883	98.883	98.883	98.883
BAC0536	oxyR	BAC0536|oxyRkp|tr|C4WZN6|C4WZN6_KLEPN	98.361	305	305		100	1191	100	98.689	98.689	98.689	98.689	98.689	98.689	98.689	98.689	98.689	98.689	98.689	98.689	98.689	98.689
BAC0643	corB~~~yfjD	BAC0643|corB|tr|Q9X621|Q9X621_SALTM	98.678	227	227		100	1191	100	98.678	98.678	98.678	98.678	98.678	98.238	98.678	98.678	98.678	98.678	98.678	98.678	98.678	98.678
BAC0275	nikR	BAC0275|nikR|sp|P0A6Z6|NIKR_ECOLI	98.496	133	133		100	1191	100	98.496	98.496	98.496	98.496	98.496	98.496	98.496	98.496	98.496	98.496	98.496	98.496	98.496	98.496
BAC0316	pstB	BAC0316|pstB|sp|P0AAH0|PSTB_ECOLI	98.444	257	257		100	1191	100	98.444	98.444	98.444	98.444	98.444	98.444	98.444	98.444	98.444	98.444	98.444	98.444	98.444	98.444
BAC0156	fabI	BAC0156|fabI|sp|P0AEK4|FABI_ECOLI	98.092	262	262		100	1191	99.6139	98.092	98.092	98.092	98.092	98.092	98.092	98.092	98.092	98.092	98.092	98.092	98.092	98.092	98.092
BAC0486	ais~~~pmrG	BAC0486|pmrG|sp|Q8ZNF4|AIS_SALTY	97.512	201	201		100	1191	104.384	98.01	98.01	98.01	98.01	98.01	98.01	98.01	97.512	98.01	98.01	98.01	98.01	98.01	98.01
BAC0194	ibpA	BAC0194|ibpA|sp|P0C054|IBPA_ECOLI	97.81	137	137		100	1191	100	97.81	97.81	97.81	97.81	97.81	97.81	97.81	97.81	97.81	97.81	97.81	97.81	97.81	97.81
BAC0317	pstC	BAC0317|pstC|sp|P0AGH8|PSTC_ECOLI	97.492	319	319		100	1191	100	97.806	97.806	97.806	97.806	97.806	97.806	97.806	97.806	97.806	97.806	97.806	97.806	97.806	97.806
BAC0368	sodA	BAC0368|sodA|sp|P00448|SODM_ECOLI	97.573	206	206		100	1191	98.7013	97.573	97.573	97.573	97.573	97.573	97.573	97.573	97.573	97.573	97.573	97.087	97.573	97.573	97.573
BAC0564	actP	BAC0564|actP/yjcG|sp|P32705|ACTP_ECOLI	96.721	549	549		99.916	1190	100	96.903	96.903	96.903	96.903	96.903	96.903	96.903	96.903	96.903	96.903	96.903	96.903	96.903	96.903
BAC0464	znuB	BAC0464|znuB/yebI|sp|P39832|ZNUB_ECOLI	92.72	261	261		100	1191	100	96.169	96.169	96.169	96.169	96.154	96.169	96.169	96.169	96.169	96.169	96.169	96.169	96.169	96.169
BAC0370	group_2555	BAC0370|soxR|sp|P0ACS2|SOXR_ECOLI	96.053	152	154		99.8321	1189	100	96.053	96.053	96.053	96.053	96.053	96.053	95.395	96.053	96.053	96.053	96.053	96.053	96.053	96.053
BAC0148	emrB	BAC0148|emrB|sp|P0AEJ0|EMRB_ECOLI	95.817	502	512		100	1191	100	95.817	95.817	95.817	95.817	95.817	95.817	95.817	95.817	95.817	95.817	95.817	95.817	95.817	95.817
BAC0533	cpxR	BAC0533|cpxR|tr|C4WZK6|C4WZK6_KLEPN	95.279	233	232		100	1191	100	95.69	95.69	95.69	95.69	95.69	95.69	95.69	95.69	95.69	95.69	95.69	95.69	95.69	95.69
BAC0465	znuC	BAC0465|znuC/yebM|sp|P0A9X1|ZNUC_ECOLI	95.618	251	251		100	1191	100	95.618	95.618	95.618	95.219	95.618	95.618	95.618	95.618	95.618	95.618	95.618	95.618	95.618	95.618
BAC0315	pstA	BAC0315|pstA|sp|P07654|PSTA_ECOLI	95.608	296	296		100	1191	100	95.608	95.608	95.608	95.608	95.608	95.608	95.608	95.27	95.608	95.608	95.608	95.608	95.608	95.608
BAC0532	cpxA	BAC0532|cpxA|tr|C4WZK5|C4WZK5_KLEPN	95.405	457	457		100	1191	100.431	95.405	95.405	95.405	95.405	95.405	95.405	95.405	95.405	95.186	95.405	95.405	95.405	95.405	95.405
BAC0371	soxS_E52K	BAC0371|soxS|sp|P0A9E2|SOXS_ECOLI	95.327	107	107		99.8321	1189	100	95.327	95.327	95.327	95.327	95.327	95.327	95.327	94.393	95.327	95.327	95.327	95.327	95.327	95.327
BAC0560	marA	BAC0560|marA|sp|P0ACH5|MARA_ECOLI	95.238	126	127		100	1191	100	95.238	95.238	95.238	95.238	95.238	95.238	95.238	95.238	95.238	95.238	95.238	95.238	95.238	95.238
BAC0610	modB	BAC0610|modB|sp|P0AF01|MODB_ECOLI	95.197	229	229		100	1191	100	95.197	95.197	95.197	95.197	95.197	95.197	95.197	95.197	95.197	95.197	95.197	95.197	95.197	95.197
BAC0006	acrB	BAC0006|acrB|sp|P31224|ACRB_ECOLI	94.872	1014	1049		100	1191	98.7013	94.872	94.566	94.566	94.476	94.566	94.471	94.566	94.566	94.566	94.566	94.566	94.566	94.566	94.471
BAC0707	sodB	BAC0707|sodB|sp|P0AGD3|SODF_ECOLI	94.301	193	193		100	1191	99.8801	94.819	94.301	94.819	94.301	94.819	94.301	94.819	94.301	94.301	94.301	94.301	94.819	94.301	94.819
BAC0251	mntH	BAC0251|mntH/yfeP|sp|P0A769|MNTH_ECOLI	93.689	412	412		100	1191	100	93.689	93.689	93.689	93.689	93.689	93.689	93.689	93.689	93.689	93.689	93.689	93.689	93.689	93.689
BAC0041	bcr	BAC0041|bcr|sp|P28246|BCR_ECOLI	93.182	396	396		100	1191	100	93.687	93.687	93.687	93.687	93.687	93.687	93.687	93.687	93.687	93.687	93.687	93.687	93.687	93.687
BAC0462	zntR	BAC0462|zntR/yhdM|sp|P0ACS5|ZNTR_ECOLI	93.478	138	141		100	1191	101.29	93.478	92.908	92.908	92.908	92.199	92.908	92.908	92.908	92.908	92.908	92.908	92.908	92.908	92.908
BAC0530	phoP	BAC0530|phoB|tr|C4X6T6|C4X6T6_KLEPN	93.274	223	237		100	1191	99.7951	93.274	93.274	93.274	93.274	93.274	93.274	93.274	93.274	92.825	93.274	93.274	93.274	93.274	93.274
BAC0725	copA	BAC0725|copA|sp|Q59385|COPA_ECOLI	93.157	833	834		100	1191	100.466	93.157	93.037	93.157	93.157	93.157	93.157	93.157	93.157	93.157	93.157	93.157	93.037	93.157	93.037
BAC0559	mprA	BAC0559|emrR|sp|P0ACR9|MPRA_ECOLI	93.143	175	176		100	1191	99.2126	93.143	93.143	93.143	93.143	93.143	93.143	93.143	93.143	93.143	93.143	93.143	93.143	93.143	93.143
BAC0470	zur	BAC0470|zur/yjbK|sp|P0AC51|ZUR_ECOLI	92.982	171	171		100	1191	100	92.982	92.982	92.982	92.982	92.982	92.398	92.982	92.982	92.982	92.982	92.982	92.982	92.982	92.982
BAC0167	fieF	BAC0167|fieF/yiip|sp|P69380|FIEF_ECOLI	92.905	296	300		100	1191	100	92.905	92.905	92.905	92.568	92.905	92.905	92.905	92.905	92.905	92.905	92.905	92.905	92.905	92.905
BAC0181	glpF	BAC0181|glpF|sp|P0AER0|GLPF_ECOLI	92.883	281	281		100	1191	100	92.883	92.883	92.883	92.883	92.883	92.883	92.883	92.883	92.883	92.883	92.883	92.883	92.883	92.883
BAC0218	mdtK	BAC0218|mdtK/ydhE|sp|P37340|MDTK_ECOLI	92.56	457	457		100	1191	99.5122	92.779	92.779	92.779	92.779	92.779	92.779	92.779	92.779	92.779	92.779	92.779	92.779	92.779	92.779
BAC0334	robA	BAC0334|robA|sp|P0ACI0|ROB_ECOLI	92.388	289	289		100	1191	100	92.734	92.734	92.734	92.734	92.734	92.734	92.734	92.734	92.734	92.734	92.734	92.734	92.734	92.734
BAC0149	emrD	BAC0149|emrD|sp|P31442|EMRD_ECOLI	92.386	394	394		100	1191	100	92.64	92.386	92.386	92.386	92.386	92.64	92.386	92.386	92.386	92.386	92.386	92.386	92.386	92.386
BAC0469	zupT	BAC0469|zupT/ygiE|sp|P0A8H3|ZUPT_ECOLI	92.607	257	257		100	1191	100	92.607	92.607	91.829	92.218	92.607	92.607	92.218	92.218	92.218	92.218	92.607	92.607	92.607	92.607
BAC0312	pitA	BAC0312|pitA|sp|P0AFJ7|PITA_ECOLI	92.585	499	499		100	1191	100	92.585	92.585	92.585	92.585	92.585	92.585	92.585	92.385	92.585	92.585	92.585	92.585	92.585	92.585
BAC0010	adeB	BAC0010|acrF/envD|sp|P24181|ACRF_ECOLI	88.674	1033	1034	absent from HC900_1450	94.8783	1130	88.3721	92.563	92.563		88.674	88.674	88.674	88.674	88.383		88.577	88.674	88.577	88.674	88.577
BAC0541	ssuE	BAC0541|yieF|sp|P0AGE6|YIEF_ECOLI	92.513	187	188		100	1191	99.4318	92.513	92.513	92.513	92.513	92.513	92.513	91.979	92.513	92.513	92.513	92.513	92.513	92.513	92.513
BAC0318	pstS	BAC0318|pstS|sp|P0AG82|PSTS_ECOLI	92.197	346	346		100	1191	98.2143	92.486	91.908	92.197	92.197	92.197	92.197	92.197	92.197	91.908	92.197	92.486	92.197	91.908	92.197
BAC0215	mdtG	BAC0215|mdtG/yceE|sp|P25744|MDTG_ECOLI	90.323	403	408		100	1191	97.5207	92.462	90.323	91.549	90.323	90.571	90.323	90.323	90.074	90.074	92.462	90.323	90.571	90.323	90.074
BAC0434	ychH	BAC0434|ychH|sp|P0AB49|YCHH_ECOLI	92.391	92	92		100	1191	100	92.391	92.391	92.391	92.391	92.391	92.391	92.391	92.391	92.391	92.391	92.391	92.391	92.391	92.391
BAC0561	marR	BAC0561|marR|sp|P27245|MARR_ECOLI	91.667	144	144		100	1191	100	92.361	92.361	92.361	91.667	92.361	92.361	92.361	92.361	92.361	92.361	92.361	92.361	92.361	92.361
BAC0451	yodD	BAC0451|yodD|sp|P64519|YODD_ECOLI	92	75	75		100	1191	94.5687	92	92	92	92	92	92	92	92	92	92	92	92	92	92
BAC0196	iclR	BAC0196|iclR|sp|P16528|ICLR_ECOLI	91.971	274	274		99.916	1190	100.488	91.971	91.971	91.971	91.971	91.971	91.971	91.971	91.971	91.971	91.971	91.971	91.971	91.971	91.971
BAC0049	group_5702	BAC0049|bhsA/ycfR/comC|sp|P0AB40|BHSA_ECOLI	91.765	85	85	absent from HC900_1543c	97.1453	1157	100	91.765	91.765	91.765	91.765	91.765	91.765	91.765	91.765	91.765		91.765	91.765	91.765	91.765
BAC0611	modC	BAC0611|modC|sp|P09833|MODC_ECOLI	91.761	352	352		100	1191	100	91.761	91.761	91.761	91.761	91.761	91.761	91.761	91.761	91.761	91.761	91.761	91.761	91.761	91.761
BAC0296	lptD	BAC0296|ostA/lptD|sp|P31554|LPTD_ECOLI	91.476	786	784		100	1191	100	91.709	91.709	91.327	91.582	91.582	91.582	91.454	91.709	91.327	91.709	91.709	91.454	91.709	91.327
BAC0005	acrA	BAC0005|acrA|sp|P0AE06|ACRA_ECOLI	91.688	397	397		100	1191	96.6635	91.688	91.688	91.688	91.688	91.688	91.184	91.688	91.688	91.436	91.688	91.688	91.688	91.688	91.688
BAC0393	group_2384	BAC0393|tolC|sp|P02930|TOLC_ECOLI	91.332	473	493		100	1191	100	91.332	89.858	89.655	89.858	89.655	89.858	89.858	89.858	89.858	89.858	89.858	89.655	89.858	89.858
BAC0105	cueR	BAC0105|cueR/ybbI|sp|P0A9G4|CUER_ECOLI	91.045	134	135		100	1191	100	91.045	91.045	91.045	91.045	91.045	91.045	91.045	91.045	91.045	91.045	91.045	91.045	91.045	91.045
BAC0253	mntR	BAC0253|mntR|sp|P0A9F1|MNTR_ECOLI	90.968	155	155		100	1191	100	90.968	90.968	90.968	90.968	90.968	90.968	90.968	90.968	90.968	90.968	90.968	90.968	90.968	90.968
BAC0252	mntP	BAC0252|mntP/yebN|sp|P76264|MNTP_ECOLI	90.957	188	188		99.8321	1189	100	90.957	90.957	90.957	90.957	90.957	90.957	90.957	90.957	90.957	90.426	90.957	90.957	90.957	90.957
BAC0208	group_271	BAC0208|mdfA/cmr|sp|P0AEY8|MDFA_ECOLI	89.563	412	410		100	1191	98.7745	90.887	90.887	90.887	90.887	90.887	90.887	90.887	90.887	90.887	90.887	90.887	90.887	90.887	90.887
BAC0147	group_327	BAC0147|emrA|sp|P27303|EMRA_ECOLI	89.744	390	390		100	1191	98.0469	89.744	89.744	89.744	89.744	89.744	89.744	89.744	89.744	89.744	89.744	89.744	89.744	89.744	89.744
BAC0113	cutA	BAC0113|cutA|sp|P69488|CUTA_ECOLI	89.565	115	112		100	1191	100	89.565	89.565	89.565	89.565	89.565	89.565	89.565	89.565		89.565	89.565	89.565	89.565	89.565
BAC0115	lnt	BAC0115|cutE/lnt|sp|P23930|LNT_ECOLI	89.258	512	512		100	1191	98.3051	89.453	89.453	89.062	89.258	89.258	89.453	89.258	89.258	89.258	89.258	89.453	89.258	89.453	89.258
BAC0608	modE	BAC0608|modE|sp|P0A9G8|MODE_ECOLI	89.313	262	262		100	1191	100	89.313	89.313	89.313	89.313	89.313	89.313	89.313	89.313	89.313	88.931	89.313	89.313	89.313	89.313
BAC0445	ydeI	BAC0445|ygiW|sp|P0ADU5|YGIW_ECOLI	89.231	130	130		100	1191	100	89.231	89.231	89.231	89.231	88.462	89.231	89.231	89.231	89.231	89.231	88.462	89.231	89.231	89.231
BAC0011	mscK~~~acrR	BAC0011|acrR/ybaH|sp|P0ACS9|ACRR_ECOLI	88.947	190	215		100	1191	99.1379	88.947	86.916	86.916	86.916	86.916	86.916	86.916	86.916	86.916	86.916	86.916	86.916	86.916	86.916
BAC0009	group_2322	BAC0009|acrE/envC|sp|P24180|ACRE_ECOLI	88.684	380	385	absent from HC900_1450	94.8783	1130	99.9033	88.684	88.421		88.421	88.421	88.684	88.421	88.158		88.684	88.684	88.684	88.684	88.684
BAC0166	fetB	BAC0166|fetB/ybbM|sp|P77307|YBBM_ECOLI	88.372	258	259		100	1191	98.6667	88.372	88.372	88.372	88.372	88.372	88.372	88.372	88.372	88.372	88.372	88.372	88.372	88.372	88.372
BAC0195	ibpB	BAC0195|ibpB|sp|P0C058|IBPB_ECOLI	88.028	142	142		100	1191	100	88.028	88.028	88.028	88.028	88.028	88.028	88.028	88.028	88.028	88.028	88.028	88.028	88.028	88.028
BAC0540	nfsA	BAC0540|nfsA|sp|P17117|NFSA_ECOLI	87.917	240	240		100	1191	99.4681	87.917	87.917	87.917	87.917	87.917	87.917	87.917	87.917	87.5	87.917	87.917	87.5	87.917	87.917
BAC0467	zraR	BAC0467|zraR/hydH|sp|P14375|ZRAR_ECOLI	87.872	437	441		100	1191	100	87.872	87.302	87.302	87.302	87.302	87.302	87.302	87.075	87.302	87.302	87.302	87.302	87.302	87.302
BAC0384	tehA	BAC0384|tehA|sp|P25396|TEHA_ECOLI	87.234	329	330	absent from HC900_20879	96.4736	1149	99.4924	87.234	87.234	87.234		86.93	87.234	87.234	86.93	86.93	87.234	87.234	87.234	87.234	87.234
BAC0477	mdtI	BAC0477|kpnF|tr|C4X7Z4|C4X7Z4_KLEPN	86.239	109	109		99.916	1190	100	87.156	87.156	87.156	87.156	87.156	87.156	87.156	87.156	87.156	87.156	86.239	87.156	87.156	87.156
BAC0609	modA	BAC0609|modA|sp|P37329|MODA_ECOLI	86.77	257	257		100	1191	100	86.77	86.77	86.77	86.77	86.77	86.77	86.381	86.77	86.381	86.77	86.77	86.381	86.77	86.381
BAC0463	znuA	BAC0463|znuA/yebL|sp|P39172|ZNUA_ECOLI	86.624	314	310		100	1191	100	86.624	86.624	86.624	86.624	86.624	86.624	86.624	86.306	86.624	86.624	86.624	86.624	86.624	86.624
BAC0146	norM	BAC0146|emmdR|tr|D5CJ69|D5CJ69_ENTCC	86.275	459	462		99.7481	1188	100	86.275	86.275	86.275	86.275	86.275	86.275	86.057	85.598	86.275	86.275	86.275	85.839	86.275	86.057
BAC0459	zitB	BAC0459|zitB/ybgR|sp|P75757|ZITB_ECOLI	86.149	296	313		100	1191	99.8634	86.149	86.149	86.149	86.149	86.149	86.149	85.811	86.149	86.149	86.149	86.149	86.149	86.149	85.811
BAC0136	dsbA	BAC0136|dsbA|sp|P0AEG4|DSBA_ECOLI	85.577	208	208		100	1191	86.9318	86.058	86.058	86.058	86.058	86.058	86.058	86.058	86.058	86.058	86.058	86.058	86.058	85.577	86.058
BAC0378	sugE	BAC0378|sugE|sp|P69937|SUGE_ECOLI	85.714	105	105		100	1191	99.697	85.714	85.714	85.714	85.714	85.714	85.714	85.714	85.714	85.714	85.714	85.714	85.714	85.714	84.762
BAC0461	zntA	BAC0461|zntA/yhhO|sp|P37617|ATZN_ECOLI	85.226	731	732		100	1191	97.8723	85.363	85.226	85.363	85.226	85.363	85.226	85.363	84.952	85.363	85.363	85.226	85.363	85.226	85.226
BAC0219	mdtM	BAC0219|mdtM/yjiO|sp|P39386|MDTM_ECOLI	85.294	408	410		100	1191	100	85.294	85.294	85.294	85.294	85.294	85.294	85.294	85.294	85.294	85.294	85.294	85.294	85.294	84.804
BAC0137	dsbB	BAC0137|dsbB|sp|P0A6M2|DSBB_ECOLI	83.66	153	176		100	1191	100.424	85.227	85.227	85.227	84.659	85.227	85.227	85.227	85.227	85.227	85.227	85.227	84.659	85.227	85.227
BAC0385	tehB	BAC0385|tehB|sp|P25397|TEHB_ECOLI	84.184	196	197	absent from HC900_20879	96.4736	1149	95.9432	84.184	83.673	83.673		84.184	84.184	84.184	84.184	84.184	84.184	84.184	84.184	84.184	84.184
BAC0217	group_2406	BAC0217|mdtJ/ebrB/ydgF|sp|Q3Z1V3|MDTJ_SHISS	83.898	118	121		99.916	1190	100	83.898	83.898	83.898	83.898	83.898	83.898	83.898	83.898	83.898	83.898	83.898	83.898	83.898	83.898
BAC0138	dsbC	BAC0138|dsbC|sp|P0AEG6|DSBC_ECOLI	83.544	237	236		100	1191	99.3506	83.544	83.544	83.544	83.544	83.544	83.544	83.544	83.122	83.544	83.544	83.544	83.544	83.544	83.544
BAC0114	cutC	BAC0114|cutC|sp|P67826|CUTC_ECOLI	82.258	248	248		100	1191	100	82.661	82.258	82.258	81.855	82.661	82.258	82.258	82.661	82.258	82.258	82.258	82.258	82.258	82.258
BAC0531	phoQ	BAC0531|phoR|tr|C4X6T5|C4X6T5_KLEPN	80.903	487	488		100	1191	100	80.903	80.903	80.903	80.903	80.903	80.903	80.312	80.903	80.903	80.903	80.903	80.903	80.903	80.903
BAC0076	comR	BAC0076|comR/ycfQ|sp|P75952|COMR_ECOLI	80	210	210	absent from HC900_1543c	97.1453	1157	100	80.476	80.476	80.476	80	80.476	80.476	80.476	80.476	80.476		80.476	80	80.476	80.476
BAC0446	group_5669	BAC0446|yhcN|sp|P64614|YHCN_ECOLI	80.46	87	87		100	1191	100	80.46	80.46	80.46	80.46	80.46	80.46	80.46	80.46	80.46	79.31	80.46	80.46	80.46	80.46
BAC0354	group_2061	BAC0354|smdB|tr|A7VN02|A7VN02_SERMA	79.561	592	592		100	1191	100	79.561	79.561	79.561	79.561	79.561	79.561	79.561	79.561	79.561	79.392	79.392	79.561	79.561	79.561
BAC0436	group_4158	BAC0436|ydeI|sp|P31130|YDEI_ECOLI	79.231	130	130		100	1191	100	79.231	79.231	79.231	79.231	79.231	79.231	79.231	79.231	79.231	79.231	79.231	79.231	79.231	79.231
BAC0353	mdlB	BAC0353|smdA|tr|A7VN01|A7VN01_SERMA	79.046	587	591		100	1191	100	79.216	79.216	79.216	79.216	79.216	79.216	79.216	79.216	79.046	79.216	79.216	79.216	79.046	79.216
BAC0529	ompC	BAC0529|kpnO|tr|C4XBC3|C4XBC3_KLEPN	77.953	381	365		99.916	1190	94.0928	77.953	77.953	77.953	77.953	77.953	77.953	77.953	77.953	77.953	77.953	77.953	77.953	77.953	77.953
BAC0331	rcnB	BAC0331|rcnB/yohN|sp|P64534|RCNB_ECOLI	76.364	110	112		99.916	1190	100	76.364	76.364	76.364	76.364	76.364	76.364	76.364	76.364	76.364	76.364	76.364	76.364	76.364	76.364
BAC0116	nlpE	BAC0116|cutF/nlpE|sp|P40710|NLPE_ECOLI	76.293	232	236		100	1191	100	76.293	76.293	76.293	76.293	76.293	76.293	76.293	76.293	76.293	76.293	75.862	76.293	76.293	76.293
BAC0571	group_3866	BAC0571|arsA|sp|O50593|ARSA_ACIMA	92.65	585	583	present HC100_140575 && sporadic in 1543a	5.54156	66	100	92.65	92.65
BAC0576	group_4417	BAC0576|arsB|sp|P52146|ARSB2_ECOLX	95.804	429	429	present HC100_140575 && sporadic in 1543a	5.54156	66	100	98.601	98.601
BAC0583	group_4435	BAC0583|arsC|sp|P52147|ARSC2_ECOLX	93.617	141	141	present HC100_140575 && sporadic in 1543a	5.54156	66	100	95.035	95.035
BAC0587	group_4416	BAC0587|arsD|sp|P52148|ARSD2_ECOLX	90.833	120	120	present HC100_140575 && sporadic in 1543a	5.54156	66	100	90.833	90.833
BAC0034	group_3921	BAC0034|arsH|tr|E8PS81|E8PS81_YERPE	78.39	236	232	sporadic in HC900_1543a	3.69437	44	101.724	78.39
BAC0034	arsH	BAC0034|arsH|tr|E8PS81|E8PS81_YERPE	79.565	230	232	present in HC100_140575	1.84719	22	100	79.565	79.565
BAC0589	group_4689	BAC0589|arsR|sp|P15905|ARSR1_ECOLX	94.017	117	117	present in HC100_140575 && sporadic in HC900_1543a	5.54156	66	100	94.017	91.379
BAC0572	group_124	BAC0572|arsA|sp|P08690|ARSA1_ECOLX	89.708	583	583		0.0839631	1	100	89.708
BAC0576	group_250	BAC0576|arsB|sp|P52146|ARSB2_ECOLX	95.105	429	429		0.0839631	1	100	95.105
BAC0584	group_2923	BAC0584|arsC|sp|O50595|ARSC_ACIMA	92.199	141	141		0.0839631	1	100	92.199
BAC0587	group_3916	BAC0587|arsD|sp|P52148|ARSD2_ECOLX	88.333	120	120		0.0839631	1	100	88.333
BAC0034	group_889	BAC0034|arsH|tr|E8PS81|E8PS81_YERPE	77.966	236	232		0.0839631	1	100	77.966
BAC0571	group_123	BAC0571|arsA|sp|O50593|ARSA_ACIMA	95.883	583	583		0.167926	2	100	95.883
BAC0578	group_249	BAC0578|arsB|tr|O50594|O50594_ACIMU	98.135	429	429		0.167926	2	100	98.135
BAC0584	group_2915	BAC0584|arsC|sp|O50595|ARSC_ACIMA	97.163	141	141		0.167926	2	100	97.163
BAC0587	group_3904	BAC0587|arsD|sp|P52148|ARSD2_ECOLX	92.5	120	120		0.167926	2	100	92.5
BAC0591	group_4082	BAC0591|arsR|sp|P52144|ARSR2_ECOLX	94.017	117	117		0.3	3	100	94.017
BAC0572	group_121	BAC0572|arsA|sp|P08690|ARSA1_ECOLX	95.712	583	583	present HC1450_HC100_1748 and sporadic1543b24950	3.44249	41	100	95.712
BAC0031	arsB	BAC0031|arsB|sp|P08691|ARSB1_ECOLX	95.592	431	429	present HC1450_HC100_1748 and sporadic1543b24950	3.44249	41	100	95.592
BAC0582	arsC	BAC0582|arsC|sp|P08692|ARSC1_ECOLX	93.617	141	141	present HC1450_HC100_1748&& sporadic in HC900_1543b_HC200_24950	3.44249	41	100	93.617
BAC0033	arsD	BAC0033|arsD|sp|P46003|ARSD1_ECOLX	94.167	120	120	present HC1450_HC100_1748 and sporadic1543b24950	3.44249	41	101.724	94.167
BAC0034	group_1976	BAC0034|arsH|tr|E8PS81|E8PS81_YERPE	77.119	236	232	present HC1450_HC100_1748 and sporadic1543b24950	3.44249	41	101.724	77.119
BAC0589	group_4062	BAC0589|arsR|sp|P15905|ARSR1_ECOLX	98.291	117	117	present HC1450_HC100_1748 and sporadic1543b24950	3.44249	41	100	98.291
		75 % identity; > 80% length
BAC0303	pcoA	BAC0303|pcoA|sp|Q47452|PCOA_ECOLX	99.174	605	605		0.251889	3	100
BAC0304	pcoB	BAC0304|pcoB|sp|Q47453|PCOB_ECOLX	100	296	296		0.251889	3	100
BAC0305	pcoC	BAC0305|pcoC|sp|Q47454|PCOC_ECOLX	99.206	126	126		0.251889	3	100
BAC0306	pcoD	BAC0306|pcoD|sp|Q47455|PCOD_ECOLX	98.706	309	309		0.251889	3	100
BAC0307	pcoE	BAC0307|pcoE|sp|Q47459|PCOE_ECOLX	90.972	144	144		0.251889	3	100
BAC0308	pcoR	BAC0308|pcoR|sp|Q47456|PCOR_ECOLX	100	226	226		0.251889	3	100
BAC0309	pcoS	BAC0309|pcoS|sp|Q47457|PCOS_ECOLX	94.635	466	466		0.251889	3	100
BAC0341	silA	BAC0341|silA|sp|Q9ZHC9|SILA_SALTM	99.427	1048	1048		0.335852	4	100
BAC0342	silB	BAC0342|silB|sp|Q9ZHD0|SILB_SALTM	98.372	430	430		0.335852	4	100
BAC0343	silC	BAC0343|silC|sp|Q9ZHD2|SILC_SALTM	97.397	461	461		0.335852	4	100
BAC0344	silE	BAC0344|silE|sp|Q9Z4N3|SILE_SALTM	90.21	143	143		0.335852	4	93.75
BAC0345	silF	BAC0345|silF|tr|Q9ZHD1|Q9ZHD1_SALTM	98.889	90	96		0.335852	4	99.0291
BAC0346	silP	BAC0346|silP|sp|Q9ZHC7|SILP_SALTM	95.098	816	824		0.335852	4	100
BAC0347	silR	BAC0347|silR|sp|Q9ZHD3|SILR_SALTM	92.544	228	228		0.335852	4	99.3964
BAC0348	silS	BAC0348|silS|sp|Q9ZHD4|SILS_SALTM	92.713	494	497		0.335852	4	100
BAC0378	group_4960	BAC0378|sugE|sp|P69937|SUGE_ECOLI	82.857	105	105		0.0839631	1	99.093
BAC0467	group_2249	BAC0467|zraR/hydH|sp|P14375|ZRAR_ECOLI	87.872	437	441		0.0839631	1	100.343
BAC0323	qacEdelta1	BAC0323|qacEdelta1|tr|Q7BQY4|Q7BQY4_PSEAI	100	115	115		0.0839631	1	100
BAC0324	qacL	BAC0324|qacF|sp|Q9X2N9|QACF_ENTAE	92.727	110	110		0.335852	4	100
