# Supplementary material for: Global population genomics of Salmonella enterica serotype Napoli, an emerging pathogen with an unusual epidemiologic pattern
Source: Research Square preprint supplement (doi:10.21203/rs.3.rs-8608855/v1), 2026-01-16
Supplement: Supplementary file 7 [file c17af2831812f006043733e0.xlsx]

## Sheet: Data 1
Species	Serotype (prediction) *	Strain name	Alternative name	Year of isolation	Country of sampling/ isolation	Inferred Region of contamination	Region of sampling or patient's residence	Subregion of sampling or patient's residence	Postcode of sampling or patient's residence*	NUTS_ID # (area of collection)	Travel_declaratation and other comments	Sample origin	Sample origin detail2	Month of collection	Day of collection	Gender	Age (years)	Epidemy	EnteroBase Barcode	EnteroBase Assembly Barcode	MLST	eBG	aroC	dnaN	hemD	hisD	purE	sucA	thrA	HC0	HC2	HC5	HC10	HC20	HC50	HC100	HC200	HC400	HC900	Lineages	Napoli clade	HC2000	HC2600	HC2850	Acquired AMR genes	QRDR	Accession nos (short reads)	Accession nos (circularized genomes)	Source
S. enterica	Napoli	59-1	1_59	1959	France	France	Grand-Est	67		FRF11		Human	Stool						SAL_WA3391AA	SAL_KB9387AA_AS	474	60	161	147	96	178	155	12	142	176228	176228	176228	176228	124002	124002	27729	27729	27729	1543	1543a	N2	1289	104	2		wild_type	ERR16083091		This study
S. enterica	Napoli	67-1	1_67	1967	Italy	Italy	Lombardia			ITC4		Human	Stool						SAL_WA3393AA	SAL_KB9389AA_AS	4550	60	783	147	666	178	155	12	142	176230	176230	176230	176230	176230	176230	107080	107080	107080	1543	1543ab	N2	1289	104	2		wild_type	ERR16071796		This study
S. enterica	Napoli	67-2	2_67	1967	Italy	Italy	Sicilia			ITG1		Animal	Wild_Lizard						SAL_WA3396AA	SAL_KB9392AA_AS	5960	60	161	147	348	1213	155	12	142	176231	176231	176231	176231	176231	176231	176231	176231	176231	107120	107120	N1	1289	104	2		wild_type	ERR16071849		This study
S. enterica	Napoli	67-3	3_67	1967	Italy	Italy	Sicilia			ITG1		Animal	Wild_Lizard						SAL_WA3394AA	SAL_KB9390AA_AS	2019	60	161	147	348	178	155	12	142	176226	176226	176226	176226	176226	176226	176226	107057	107057	7673	7673	N1	1289	104	2		wild_type	ERR16071798		This study
S. enterica	Napoli	67-4	4_67	1967	Italy	Italy	Sicilia			ITG1		Animal	Wild_Lizard						SAL_WA3395AA	SAL_KB9391AA_AS	2019	60	161	147	348	178	155	12	142	176229	176229	176229	176229	176229	176226	176226	107057	107057	7673	7673	N1	1289	104	2		wild_type	ERR16071800		This study
S. enterica	Napoli	67-5	5_67	1967	Italy	Italy	Sicilia			ITG1		Animal	Wild_Lizard						SAL_WA3397AA	SAL_KB9393AA_AS	2019	60	161	147	348	178	155	12	142	176233	176233	176233	176233	176233	176226	176226	107057	107057	7673	7673	N1	1289	104	2		wild_type	ERR16071801		This study
S. enterica	Napoli	67-6	6_67	1967	Italy	Italy	Sicilia			ITG1		Animal	Wild_Lizard						SAL_WA3398AA	SAL_KB9394AA_AS	2019	60	161	147	348	178	155	12	142	176235	176235	176235	176235	176229	176226	176226	107057	107057	7673	7673	N1	1289	104	2		wild_type	ERR16071802		This study
S. enterica	Napoli	70-2	2_70	1970	France	Italy	Pays-de-la-Loire	49	49100 (FAC)	FRG02		Environment	Hospital-water						SAL_WA3401AA	SAL_KB9397AA_AS	2095	60	161	147	151	178	155	12	142	176238	176238	176238	176238	176238	176238	176238	176238	1450	1450	1450	N1	1289	104	2	tet(B)	wild_type	ERR16083092		This study
S. enterica	Napoli	Nap72-2	72-2;2_72;Nap72.2	1972	France	France	Pays-de-la-Loire	49	49100 (CHU)	FRG02		Human	Stool						SAL_WA3399AA	SAL_KB9395AA_AS	474	60	161	147	96	178	155	12	142	176234	176234	176234	176234	176234	176234	27729	27729	27729	1543	1543a	N2	1289	104	2		wild_type	ERR16083093	CP163475-CP163476	This study
S. enterica	Napoli	73-2	2_73	1973	France	France	Provence-Alpes-Cote-dAzur	06	06600 (CH)	FRL03		Human	Stool						SAL_WA3402AA	SAL_KB9398AA_AS	474	60	161	147	96	178	155	12	142	176236	176236	176236	176236	176236	140577	26263	24950	1543	1543	1543b	N2	1289	104	2		wild_type	ERR16083094		This study
S. enterica	Napoli	75-1	1_75	1975	France	France	Pays-de-la-Loire	44	44093 (CHU)	FRG01		Human	Stool						SAL_WA3403AA	SAL_KB9399AA_AS	474	60	161	147	96	178	155	12	142	176237	176237	176237	176237	176237	176237	27729	27729	27729	1543	1543a	N2	1289	104	2		wild_type	ERR16083095		This study
S. enterica	Napoli	76-1	1_76	1976	France	France	Nouvelle-Aquitaine	33	33000 (CHU)	FRI12		Human							SAL_WA3404AA	SAL_KB9400AA_AS	474	60	161	147	96	178	155	12	142	176239	176239	176239	176239	176239	140738	27733	27733	27729	1543	1543a	N2	1289	104	2		wild_type	ERR16083096		This study
S. enterica	Napoli	76-2	2_76	1976	France	France	Pays-de-la-Loire	44	44093 (CHU)	FRG01		Human	Stool						SAL_WA3405AA	SAL_KB9401AA_AS	474	60	161	147	96	178	155	12	142	176242	176242	176242	176242	176242	124002	27729	27729	27729	1543	1543a	N2	1289	104	2		wild_type	ERR16083097		This study
S. enterica	Napoli	76-3	3_76	1976	Italy	Italy	Lombardia			ITC4		Animal	Livestock_Bovine						SAL_WA3406AA	SAL_KB9402AA_AS	474	60	161	147	96	178	155	12	142	176241	176241	176241	176241	176241	137341	97218	24950	1543	1543	1543b	N2	1289	104	2		wild_type	ERR16071817		This study
S. enterica	Napoli	77-1	1_77	1977	France	France	Pays-de-la-Loire	44	44093 (CHU)	FRG01		Human	Stool						SAL_WA3407AA	SAL_KB9403AA_AS	474	60	161	147	96	178	155	12	142	176244	176244	176244	176244	176244	176244	27729	27729	27729	1543	1543a	N2	1289	104	2	aph(6)-Id,aph(3'')-Ib	wild_type	ERR16083098		This study
S. enterica	Napoli	77-2	2_77	1977	France	France	Pays-de-la-Loire	53	53000 (LAM)	FRG03		Human	Stool						SAL_WA3408AA	SAL_KB9404AA_AS	474	60	161	147	96	178	155	12	142	176245	176245	176245	176245	140649	140611	27729	27729	27729	1543	1543a	N2	1289	104	2		wild_type	ERR16083099		This study
S. enterica	Napoli	78-4	4_78	1978	France	France	Occitanie	81	81000 (LAM)	FRJ27		Human	Stool						SAL_WA3409AA	SAL_KB9405AA_AS	5168	60	161	147	96	1085	155	12	142	176247	176247	176247	176247	176247	140684	140575	140575	140575	1543	1543a	N2	1289	104	2		wild_type	ERR16083100		This study
S. enterica	Napoli	82-2	2_82	1982	France	France	Hauts-de-France	02	02400 (LAM)	FRE21		Human	Stool						SAL_WA3411AA	SAL_KB9407AA_AS	474	60	161	147	96	178	155	12	142	176246	176246	97218	97218	97218	97218	97218	24950	1543	1543	1543b	N2	1289	104	2		wild_type	ERR16083101		This study
S. enterica	Napoli	82-9	9_82	1982	France	Italy	Occitanie	34	34090 (CHU)	FRJ13		Human	Stool						SAL_WA3410AA	SAL_KB9406AA_AS	2095	60	161	147	151	178	155	12	142	176243	176243	176243	176243	176243	1450	1450	1450	1450	1450	1450	N1	1289	104	2	tet(A)	wild_type	ERR16083102		This study
S. enterica	Napoli	83-14	14_83	1983	France	France	Hauts-de-France	02	02400 (LAM)	FRE21		Human	Stool						SAL_WA3417AA	SAL_KB9413AA_AS	474	60	161	147	96	178	155	12	142	176254	176254	176249	176249	124002	124002	27729	27729	27729	1543	1543a	N2	1289	104	2		wild_type	ERR16083103		This study
S. enterica	Napoli	83-2	2_83	1983	France	France	Auvergne_Rhône-Alpes	69	69372 (LBV)	FRK26		Human	Stool						SAL_WA3412AA	SAL_KB9408AA_AS	474	60	161	147	96	178	155	12	142	176252	176252	176252	176252	97218	97218	97218	24950	1543	1543	1543b	N2	1289	104	2		wild_type	ERR16083104		This study
S. enterica	Napoli	83-3	3_83	1983	France	France	Auvergne_Rhône-Alpes	69	69372 (LBV)	FRK26		Human	Blood						SAL_WA3413AA	SAL_KB9409AA_AS	474	60	161	147	96	178	155	12	142	176255	176255	176255	176255	97218	97218	97218	24950	1543	1543	1543b	N2	1289	104	2		wild_type	ERR16083105		This study
S. enterica	Napoli	83-6	6_83	1983	France	France	Ile-de-France	92	92309 (LAM)	FR105		Human	Stool						SAL_WA3414AA	SAL_KB9410AA_AS	474	60	161	147	96	178	155	12	142	176250	176250	97218	97218	97218	97218	97218	24950	1543	1543	1543b	N2	1289	104	2		wild_type	ERR16083106		This study
S. enterica	Napoli	83-9	9_83	1983	France	France	Ile-de-France	75	75018 (LAM)	FR101		Human	Blood						SAL_WA3415AA	SAL_KB9411AA_AS	474	60	161	147	96	178	155	12	142	176248	176248	176248	97218	97218	97218	97218	24950	1543	1543	1543b	N2	1289	104	2		wild_type	ERR16083107		This study
S. enterica	Napoli	84-3	3_84	1984	France	France	Occitanie	82	82000 (CH)	FRJ28		Human	Stool						SAL_WA3416AA	SAL_KB9412AA_AS	5168	60	161	147	96	1085	155	12	142	176253	176253	176253	176253	176253	140589	140575	140575	140575	1543	1543a	N2	1289	104	2		wild_type	ERR16083108		This study
S. enterica	Napoli	84-5	5_84	1984	France	France	Pays-de-la-Loire	49	49100 (CHU)	FRG02		Environment	Water						SAL_WA3418AA	SAL_KB9414AA_AS	474	60	161	147	96	178	155	12	142	176249	176249	176249	176249	124002	124002	27729	27729	27729	1543	1543a	N2	1289	104	2		wild_type	ERR16083109		This study
S. enterica	Napoli	84-7	7_84	1984	France	France	Pays-de-la-Loire	49		FRG02		Animal	Livestock_Bovine						SAL_WA3419AA	SAL_KB9415AA_AS	474	60	161	147	96	178	155	12	142	176251	176249	176249	176249	124002	124002	27729	27729	27729	1543	1543a	N2	1289	104	2		wild_type	ERR16083110		This study
S. enterica	Napoli	89-1	1_89	1989	France	France	Provence-Alpes-Cote-dAzur	06		FRL03		Animal	Rodent_wild						SAL_WA3420AA	SAL_KB9416AA_AS	474	60	161	147	96	178	155	12	142	176261	176261	176261	176261	140593	140577	26263	24950	1543	1543	1543b	N2	1289	104	2		wild_type	ERR16083111		This study
S. enterica	Napoli	89-10	10_89	1989	France	France	Pays-de-la-Loire	85	Noirmoutier island (LAM)	FRG05		Human	Stool						SAL_WA3428AA	SAL_KB9424AA_AS	474	60	161	147	96	178	155	12	142	176267	176267	176267	176266	176266	176262	27729	27729	27729	1543	1543a	N2	1289	104	2		wild_type	ERR16083112		This study
S. enterica	Napoli	89-11	11_89	1989	France	France	Pays-de-la-Loire	85	Noirmoutier island (LAM)	FRG05		Human	Stool						SAL_WA3430AA	SAL_KB9426AA_AS	474	60	161	147	96	178	155	12	142	176262	176262	176262	176262	176262	176262	27729	27729	27729	1543	1543a	N2	1289	104	2		wild_type	ERR16083113		This study
S. enterica	Napoli	89-12	12_89	1989	France	France	Pays-de-la-Loire	44	44093 (CHU)	FRG01		Human	Blood						SAL_WA3431AA	SAL_KB9427AA_AS	474	60	161	147	96	178	155	12	142	176268	176268	176268	176268	176268	176268	27729	27729	27729	1543	1543a	N2	1289	104	2		wild_type	ERR16083114		This study
S. enterica	Napoli	89-13	13_89	1989	Monaco	France	Monaco	98		FRL03		Human		09			>10 years		SAL_WA3824AA	SAL_KB9865AA_AS	474	60	161	147	96	178	155	12	142	176308	176308	176308	176308	176308	176308	26263	24950	1543	1543	1543b	N2	1289	104	2		wild_type	ERR16084282		This study
S. enterica	Napoli	89-14	14_89	1989	France	France	Provence-Alpes-Cote-dAzur	84	83600 (CH)	FRL06		Human	Stool						SAL_WA3819AA	SAL_KB9860AA_AS	474	60	161	147	96	178	155	12	142	176305	176305	176305	176301	176301	176301	107035	24950	1543	1543	1543b	N2	1289	104	2		wild_type	ERR16083115		This study
S. enterica	Napoli	89-15	15_89	1989	France	France	Centre_Val-de-Loire	36	36000 (LAM)	FRB03		Human	Stool						SAL_WA3821AA	SAL_KB9862AA_AS	474	60	161	147	96	178	155	12	142	176302	176258	176258	176258	176258	140652	27729	27729	27729	1543	1543a	N2	1289	104	2		wild_type	ERR16083116		This study
S. enterica	Napoli	89-16	16_89	1989	France	France	Pays-de-la-Loire	85	Noirmoutier island (LAM)	FRG05		Human							SAL_WA3820AA	SAL_KB9861AA_AS	474	60	161	147	96	178	155	12	142	176301	176301	176301	176301	176301	176301	107035	24950	1543	1543	1543b	N2	1289	104	2		wild_type	ERR16083117		This study
S. enterica	Napoli	89-17	17_89	1989	France	France	Pays-de-la-Loire	85	Noirmoutier island (LAM)	FRG05		Human							SAL_WA3822AA	SAL_KB9863AA_AS	474	60	161	147	96	178	155	12	142	176309	176309	176309	176309	176266	176262	27729	27729	27729	1543	1543a	N2	1289	104	2		wild_type	ERR16083118		This study
S. enterica	Napoli	89-18	18_89	1989	France	France	Pays-de-la-Loire	44	44120 (LAM)	FRG01		Human	Stool						SAL_WA3825AA	SAL_LB0521AA_AS	474	60	161	147	96	178	155	12	142	176595	176595	176595	176312	176312	176312	140587	27729	27729	1543	1543a	N2	1289	104	2		wild_type	ERR16083119		This study
S. enterica	Napoli	89-19	19_89	1989	France	France	Nouvelle-Aquitaine	17	17000 (LAM)	FRI32		Human	Stool						SAL_WA3823AA	SAL_KB9864AA_AS	474	60	161	147	96	178	155	12	142	176304	176304	176304	176304	176304	140604	27729	27729	27729	1543	1543a	N2	1289	104	2		wild_type	ERR16083120		This study
S. enterica	Napoli	89-2	2_89	1989	France	France	Bretagne	35		FRH03		Animal	Bivalve_wild_shells						SAL_WA3421AA	SAL_KB9417AA_AS	5172	60	161	147	96	1086	155	12	142	176257	176257	176257	176257	176257	176257	140682	140682	140682	1543	1543a	N2	1289	104	2		wild_type	ERR16083121		This study
S. enterica	Napoli	89-21	21_89	1989	France	France	Pays-de-la-Loire	49	49100 (CHU)	FRG02		Human	Stool						SAL_WA3826AA	SAL_KB9867AA_AS	474	60	161	147	96	178	155	12	142	176313	176313	176313	176313	176313	176313	140616	27729	27729	1543	1543a	N2	1289	104	2		wild_type	ERR16083122		This study
S. enterica	Napoli	89-22	22_89	1989	France	France	Occitanie	81	81600 (SCP)	FRJ27		Human	Stool						SAL_WA3828AA	SAL_KB9869AA_AS	474	60	161	147	96	178	155	12	142	176312	176312	176312	176312	176312	176312	140587	27729	27729	1543	1543a	N2	1289	104	2		wild_type	ERR16083123		This study
S. enterica	Napoli	89-23	23_89	1989	France	France	Nouvelle-Aquitaine	24	24100 (SCP)	FRI11		Human	Stool						SAL_WA3827AA	SAL_KB9868AA_AS	474	60	161	147	96	178	155	12	142	176311	176311	176311	176311	176311	140576	27733	27733	27729	1543	1543a	N2	1289	104	2		wild_type	ERR16083124		This study
S. enterica	Napoli	89-25	25_89	1989	France	France	Occitanie	34		FRJ13		Environment	Dried_plants						SAL_WA3830AA	SAL_KB9871AA_AS	474	60	161	147	96	178	155	12	142	176314	176314	176314	176312	176312	176312	140587	27729	27729	1543	1543a	N2	1289	104	2		wild_type	ERR16083125		This study
S. enterica	Napoli	89-3	3_89	1989	France	France	Pays-de-la-Loire	85	85800 (SCP)	FRG05		Human	Stool						SAL_WA3422AA	SAL_KB9418AA_AS	474	60	161	147	96	178	155	12	142	176256	176256	176256	176256	176256	140690	27729	27729	27729	1543	1543a	N2	1289	104	2		wild_type	ERR16083126		This study
S. enterica	Napoli	89-4	4_89	1989	France	France	Ile-de-France	95		FR108		Human							SAL_WA3423AA	SAL_KB9419AA_AS	474	60	161	147	96	178	155	12	142	176260	176260	176260	176260	124002	124002	27729	27729	27729	1543	1543a	N2	1289	104	2		wild_type	ERR16083127		This study
S. enterica	Napoli	89-5	5_89	1989	France	France	Nouvelle-Aquitaine	17	17000 (LAM)	FRI32		Human	Stool						SAL_WA3424AA	SAL_KB9420AA_AS	474	60	161	147	96	178	155	12	142	176258	176258	176258	176258	176258	140652	27729	27729	27729	1543	1543a	N2	1289	104	2		wild_type	ERR16083128		This study
S. enterica	Napoli	89-6	6_89	1989	France	France	Pays-de-la-Loire	85	85000 (CHD)	FRG05		Human	Stool						SAL_WA3425AA	SAL_KB9421AA_AS	474	60	161	147	96	178	155	12	142	176265	176265	176265	176265	140690	140690	27729	27729	27729	1543	1543a	N2	1289	104	2		wild_type	ERR16083129		This study
S. enterica	Napoli	89-7	7_89	1989	France	France	Nouvelle-Aquitaine	19	19100 (CH)	FRI21		Human	Stool						SAL_WA3426AA	SAL_KB9422AA_AS	474	60	161	147	96	178	155	12	142	176259	176259	176259	176259	176259	140580	27733	27733	27729	1543	1543a	N2	1289	104	2		wild_type	ERR16083130		This study
S. enterica	Napoli	89-8	8_89	1989	France	France	Nouvelle-Aquitaine	17	17369 Ré island (LAM)	FRI32		Human	Stool						SAL_WA3427AA	SAL_KB9423AA_AS	5170	60	161	781	96	178	155	12	142	176263	176263	176263	176263	140706	140706	140623	140623	27729	1543	1543a	N2	1289	104	2		wild_type	ERR16083131		This study
S. enterica	Napoli	89-9	9_89	1989	France	France	Pays-de-la-Loire	85	Noirmoutier island (LAM)	FRG05		Human	Stool						SAL_WA3429AA	SAL_KB9425AA_AS	474	60	161	147	96	178	155	12	142	176266	176266	176266	176266	176266	176262	27729	27729	27729	1543	1543a	N2	1289	104	2		wild_type	ERR16083132		This study
S. enterica	Napoli	90-1	1_90	1990	France	France	Nouvelle-Aquitaine	86		FRI34		Human	Stool						SAL_WA3829AA	SAL_LB0489AA_AS	474	60	161	147	96	178	155	12	142	176594	176594	176594	176594	176594	140652	27729	27729	27729	1543	1543a	N2	1289	104	2		wild_type	ERR16083133		This study
S. enterica	Napoli	90-10	10_90	1990	France	France	Grand-Est	68			Travel_to_Italy	Human	Blood	8		Male	<10		SAL_WA3836AA	SAL_KB9877AA_AS	474	60	161	147	96	178	155	12	142	176323	176323	176323	140601	140601	107128	97218	24950	1543	1543	1543b	N2	1289	104	2		wild_type	ERR16083134		This study
S. enterica	Napoli	90-11	11_90	1990	France	France	Nouvelle-Aquitaine	17	17300 (LAM)	FRI32		Human	Stool						SAL_WA3835AA	SAL_KB9876AA_AS	474	60	161	147	96	178	155	12	142	176321	176321	176321	176321	176321	176321	27729	27729	27729	1543	1543a	N2	1289	104	2		wild_type	ERR16083135		This study
S. enterica	Napoli	90-12	12_90	1990	France	France	Pays-de-la-Loire	85	85000 (LAM)	FRG05		Human	Stool						SAL_WA3839AA	SAL_KB9880AA_AS	5961	60	161	859	96	178	155	12	142	176320	176320	176320	176320	140643	140643	27729	27729	27729	1543	1543a	N2	1289	104	2		wild_type	ERR16083136		This study
S. enterica	Napoli	90-13	13_90	1990	France	France	Nouvelle-Aquitaine	17	17300 (LAM)	FRI32		Human	Stool						SAL_WA3838AA	SAL_KB9879AA_AS	474	60	161	147	96	178	155	12	142	176322	176322	176322	176322	176321	176321	27729	27729	27729	1543	1543a	N2	1289	104	2		wild_type	ERR16083137		This study
S. enterica	Napoli	90-14	14_90	1990	France	France	Occitanie	12	12000 (CHG)	FRJ22		Human	Stool						SAL_WA3840AA	SAL_KB9881AA_AS	474	60	161	147	96	178	155	12	142	176324	176324	176324	176324	176324	176324	140588	140588	140575	1543	1543a	N2	1289	104	2		wild_type	ERR16083138		This study
S. enterica	Napoli	90-15	15_90	1990	France	France	Pays-de-la-Loire	49	49300 (CH)	FRG02		Human	Stool						SAL_WA3841AA	SAL_LB0525AA_AS	474	60	161	147	96	178	155	12	142	176596	176596	176596	176322	176321	176321	27729	27729	27729	1543	1543a	N2	1289	104	2		wild_type	ERR16083139		This study
S. enterica	Napoli	90-16	16_90	1990	France	France	Occitanie	81	81000 (LAM)	FRJ27		Human	Stool						SAL_WA3842AA	SAL_KB9883AA_AS	5168	60	161	147	96	1085	155	12	142	176325	176325	176325	176325	176325	176325	165886	140575	140575	1543	1543a	N2	1289	104	2		wild_type	ERR16083140		This study
S. enterica	Napoli	90-17	17_90	1990	France	France	Occitanie	81	81000 (LAM)	FRJ27		Human	Stool						SAL_WA3843AA	SAL_KB9884AA_AS	474	60	161	147	96	178	155	12	142	176327	176327	176327	176322	176321	176321	27729	27729	27729	1543	1543a	N2	1289	104	2		wild_type	ERR16083141		This study
S. enterica	Napoli	90-18	18_90	1990	France	France	Pays-de-la-Loire	44	44093 (CHU)	FRG01		Human	Stool						SAL_WA3846AA	SAL_KB9887AA_AS	474	60	161	147	96	178	155	12	142	176331	176331	176331	176331	176331	176331	27729	27729	27729	1543	1543a	N2	1289	104	2		wild_type	ERR16083142		This study
S. enterica	Napoli	90-19	19_90	1990	France		Ile-de-France	95		FR108		Human	Stool						SAL_WA3844AA	SAL_KB9885AA_AS	4372	60	161	147	96	178	774	12	142	176326	176326	176326	176326	176326	173077	94666	94666	94666	94666	94666	N2	1289	104	2		wild_type	ERR16083143		This study
S. enterica	Napoli	90-2	2_90	1990	France	France	Pays-de-la-Loire	85	85100 (LAM)	FRG05		Human	Stool						SAL_WA3832AA	SAL_KB9873AA_AS	474	60	161	147	96	178	155	12	142	176317	176317	176317	176317	176311	140576	27733	27733	27729	1543	1543a	N2	1289	104	2		wild_type	ERR16083144		This study
S. enterica	Napoli	90-20	20_90	1990	France	France	unknown					Human	Stool						SAL_WA3845AA	SAL_KB9886AA_AS	5961	60	161	859	96	178	155	12	142	176328	176328	176320	176320	140643	140643	27729	27729	27729	1543	1543a	N2	1289	104	2		wild_type	ERR16083145		This study
S. enterica	Napoli	90-21	21_90	1990	France	France	Occitanie	31	31300 (CHU)	FRJ23		Human	Stool						SAL_WA3847AA	SAL_KB9888AA_AS	5168	60	161	147	96	1085	155	12	142	176332	176332	176329	176329	140590	140575	140575	140575	140575	1543	1543a	N2	1289	104	2		wild_type	ERR16083146		This study
S. enterica	Napoli	90-24	24_90	1990	France	France	Ile-de-France	77		FR102		Human	Blood						SAL_WA3848AA	SAL_KB9889AA_AS	5961	60	161	859	96	178	155	12	142	176330	176330	176330	176320	140643	140643	27729	27729	27729	1543	1543a	N2	1289	104	2		wild_type	ERR16083147		This study
S. enterica	Napoli	90-25	25_90	1990	France	France	Pays-de-la-Loire	85	85100 (LAM)	FRG05		Human	Stool						SAL_WA3850AA	SAL_KB9891AA_AS	474	60	161	147	96	178	155	12	142	176333	176333	176333	176333	176333	140643	27729	27729	27729	1543	1543a	N2	1289	104	2		wild_type	ERR16083148		This study
S. enterica	Napoli	90-26	26_90	1990	France	France	Pays-de-la-Loire	44	44600 (CH)	FRG01		Human	Stool						SAL_WA3851AA	SAL_KB9892AA_AS	474	60	161	147	96	178	155	12	142	176334	176334	176333	176333	176333	140643	27729	27729	27729	1543	1543a	N2	1289	104	2		wild_type	ERR16083149		This study
S. enterica	Napoli	90-27	27_90	1990	France	France	Nouvelle-Aquitaine	17	17000 (LAM)	FRI32		Human	Stool						SAL_WA3852AA	SAL_KB9893AA_AS	5961	60	161	859	96	178	155	12	142	176335	176330	176330	176320	140643	140643	27729	27729	27729	1543	1543a	N2	1289	104	2		wild_type	ERR16083150		This study
S. enterica	Napoli	90-28	28_90	1990	France	France	Nouvelle-Aquitaine	79	79200 (SCP)	FRI33		Human	Stool						SAL_WA3853AA	SAL_KB9894AA_AS	474	60	161	147	96	178	155	12	142	176337	176337	176337	176336	176336	27729	27729	27729	27729	1543	1543a	N2	1289	104	2		wild_type	ERR16083151		This study
S. enterica	Napoli	90-29	29_90	1990	France	France	Pays-de-la-Loire	85	85000 (LAM)	FRG05		Human	Stool						SAL_WA3854AA	SAL_KB9895AA_AS	474	60	161	147	96	178	155	12	142	176336	176336	176336	176336	176336	27729	27729	27729	27729	1543	1543a	N2	1289	104	2		wild_type	ERR16083152		This study
S. enterica	Napoli	90-30	30_90	1990	France	France	Pays-de-la-Loire	49		FRG02		Human	Stool						SAL_WA3857AA	SAL_KB9898AA_AS	474	60	161	147	96	178	155	12	142	176340	176340	176340	176340	176340	140611	27729	27729	27729	1543	1543a	N2	1289	104	2		wild_type	ERR16083153		This study
S. enterica	Napoli	90-6	6_90	1990	France	France	Pays-de-la-Loire	85	85100 (LAM)	FRG05		Human	Stool						SAL_WA3833AA	SAL_KB9874AA_AS	474	60	161	147	96	178	155	12	142	176319	176319	176319	176319	176319	176319	27733	27733	27729	1543	1543a	N2	1289	104	2		wild_type	ERR16083154		This study
S. enterica	Napoli	90-7	7_90	1990	France	France	Pays-de-la-Loire	49	49100 (CHU)	FRG02		Human	Stool						SAL_WA3834AA	SAL_KB9875AA_AS	474	60	161	147	96	178	155	12	142	176316	176316	176316	176316	124002	124002	27729	27729	27729	1543	1543a	N2	1289	104	2		wild_type	ERR16083155		This study
S. enterica	Napoli	90-8	8_90	1990	France	France	Pays-de-la-Loire	44	44470 (LAM )	FRG01		Human	Stool						SAL_WA3831AA	SAL_KB9872AA_AS	474	60	161	147	96	178	155	12	142	176315	176315	176315	176315	176315	176315	140587	27729	27729	1543	1543a	N2	1289	104	2		wild_type	ERR16083156		This study
S. enterica	Napoli	90-9	9_90	1990	France	France	Nouvelle-Aquitaine	16	16000 (LAM)	FRI31		Human	Stool						SAL_WA3837AA	SAL_KB9878AA_AS	474	60	161	147	96	178	155	12	142	176318	176318	176318	176318	176318	176318	27733	27733	27729	1543	1543a	N2	1289	104	2		wild_type	ERR16083157		This study
S. enterica	Napoli	Nap90-23	90-23;23_90	1990	France	France	Occitanie	31	31300 (CHU)	FRJ23		Human	Stool						SAL_WA3849AA	SAL_KB9890AA_AS	5168	60	161	147	96	1085	155	12	142	176329	176329	176329	176329	140590	140575	140575	140575	140575	1543	1543a	N2	1289	104	2		wild_type	ERR16083158	CP163484-CP163485	This study
S. enterica	Napoli	199700704	97 0704	1997	France	France	Pays-de-la-Loire	85	85035 (LAM)	FRG05		Human	Stool						SAL_WA3855AA	SAL_KB9896AA_AS	474	60	161	147	96	178	155	12	142	176341	176341	176341	176341	176341	140709	27729	27729	27729	1543	1543a	N2	1289	104	2		wild_type	ERR16083159		This study
S. enterica	Napoli	199703997	97 3997	1997	France	France	Occitanie	81	81013 (LAM)	FRJ27		Human	Stool						SAL_WA3856AA	SAL_KB9897AA_AS	5168	60	161	147	96	1085	155	12	142	176338	176338	176338	176338	176338	140684	140575	140575	140575	1543	1543a	N2	1289	104	2		wild_type	ERR16083160		This study
S. enterica	Napoli	199705435	97 5435	1997	France	France	Pays-de-la-Loire	49	49033 (LAM)	FRG02		Human	Urine						SAL_WA3858AA	SAL_KB9899AA_AS	474	60	161	147	96	178	155	12	142	176339	176339	176339	176339	176339	176339	176339	27729	27729	1543	1543a	N2	1289	104	2		wild_type	ERR16083161		This study
S. enterica	Napoli	199708355	97 8355	1997	France	France	Nouvelle-Aquitaine	33	33505 (LAM)	FRI12		Human	Stool						SAL_WA3859AA	SAL_KB9900AA_AS	474	60	161	147	96	178	155	12	142	176342	176342	176342	176342	176342	176342	27733	27733	27729	1543	1543a	N2	1289	104	2		wild_type	ERR16083162		This study
S. enterica	Napoli	199712338	9712338	1997	France	France	Bretagne	35	35200 (LAM)	FRH03		Human	Stool						SAL_WA3860AA	SAL_KB9901AA_AS	474	60	161	147	96	178	155	12	142	176343	176343	176343	176343	140649	140611	27729	27729	27729	1543	1543a	N2	1289	104	2		wild_type	ERR16083163		This study
S. enterica	Napoli	ISS_19/02/2004	Nap19-2-04	2000	Italy	Italy	Lombardia			ITC4		Human							SAL_ZA6874AA	SAL_SB4202AA_AS	474	60	161	147	96	178	155	12	142	204971	204971	204971	204971	139005	137331	97218	24950	1543	1543	1543b	N2	1289	104	2		wild_type	ERR16071737		This study
S. enterica	Napoli	ISS_19/05/2004	Nap19-5-04	2000	Italy	Italy	Lombardia			ITC4		Human							SAL_ZA6875AA	SAL_SB4203AA_AS	474	60	161	147	96	178	155	12	142	204967	204967	204967	204967	204967	107128	97218	24950	1543	1543	1543b	N2	1289	104	2		wild_type	ERR16071738		This study
S. enterica	Napoli	ISS_19/06/04	Nap19-6-04	2001	Italy	Italy	Lombardia			ITC4		Human							SAL_ZA6877AA	SAL_SB4205AA_AS	474	60	161	147	96	178	155	12	142	204975	204975	204975	204975	204972	204972	97218	24950	1543	1543	1543b	N2	1289	104	2		wild_type	ERR16071739		This study
S. enterica	Napoli	ISS_19/07/04	Nap19-7-04	2001	Italy	Italy	Lombardia			ITC4		Human							SAL_ZA6876AA	SAL_SB4204AA_AS	474	60	161	147	96	178	155	12	142	204972	204972	204972	204972	204972	204972	97218	24950	1543	1543	1543b	N2	1289	104	2		wild_type	ERR16071740		This study
S. enterica	Napoli	ISS_87/19/03	Nap87-19-03	2001	Italy	Italy	Lombardia			ITC4		Environment							SAL_ZA6973AA	SAL_SB4315AA_AS	474	60	161	147	96	178	155	12	142	205076	205076	205076	205076	205076	205076	97218	24950	1543	1543	1543b	N2	1289	104	2		wild_type	ERR16071835		This study
S. enterica	Napoli	2002LSAL11239		2002	France	France	Pays-de-la-Loire	44		FRG01		Food	lettuce_Valerianella-locusta						SAL_IB5746AA	SAL_QC4034AA_AS	474	60	161	147	96	178	155	12	142	276322	276322	276322	276322	124002	124002	27729	27729	27729	1543	1543a	N2	1289	104	2		wild_type	ERR16094173		This study
S. enterica	Napoli	200202502	02 2502	2002	France	France	Nouvelle-Aquitaine	47	47307 (LAM)	FRI14		Human	Urine						SAL_WA3863AA	SAL_KB9904AA_AS	5168	60	161	147	96	1085	155	12	142	176347	176347	176347	176347	176347	176347	176347	140575	140575	1543	1543a	N2	1289	104	2		wild_type	ERR16083164		This study
S. enterica	Napoli	200203373	02 3373	2002	France	France	Nouvelle-Aquitaine	17	17410 (LAM island of Ré)	FRI32		Human	Stool						SAL_WA3861AA	SAL_KB9902AA_AS	5170	60	161	781	96	178	155	12	142	176346	176346	176346	176346	176346	176346	140623	140623	27729	1543	1543a	N2	1289	104	2		wild_type	ERR16083165		This study
S. enterica	Napoli	200204750	02 4750	2002	France	France	Pays-de-la-Loire	53	53015 (LAM)	FRG03		Human	Stool						SAL_WA3862AA	SAL_KB9903AA_AS	474	60	161	147	96	178	155	12	142	176344	176344	176344	176344	176344	140611	27729	27729	27729	1543	1543a	N2	1289	104	2		wild_type	ERR16083166		This study
S. enterica	Napoli	200204789	02 4789	2002	France	France	Provence-Alpes-Cote-dAzur	06	06000 (LAM)	FRL03		Human	Stool						SAL_WA3866AA	SAL_KB9907AA_AS	5963	60	161	147	96	178	951	12	142	176349	176349	176349	176349	176349	140577	26263	24950	1543	1543	1543b	N2	1289	104	2		wild_type	ERR16083167		This study
S. enterica	Napoli	ISS_103/7/03	Nap103-7-03	2002	Italy	Italy	Lazio			ITI4		Human							SAL_ZA6986AA	SAL_SB4328AA_AS	2019	60	161	147	348	178	155	12	142	205087	205087	205087	205087	205087	205087	205087	107057	107057	7673	7673	N1	1289	104	2		wild_type	ERR16071713		This study
S. enterica	Napoli	ISS_17/07/03	Nap17-7-03	2002	Italy	Italy	Piemonte			ITC1		Human							SAL_ZA6873AA	SAL_SB4201AA_AS	474	60	161	147	96	178	155	12	142	204966	204966	204966	204966	204966	204966	24950	24950	1543	1543	1543b	N2	1289	104	2		wild_type	ERR16071736		This study
S. enterica	Napoli	ISS_59/1/02	Nap59-1-02	2002	Italy	Italy	Trentino_Alto_Adige_region	Bolzano_province		ITH1		Human							SAL_ZA6915AA	SAL_SB4257AA_AS	474	60	161	147	96	178	155	12	142	205017	205017	205017	205017	205017	204886	204886	24950	1543	1543	1543b	N2	1289	104	2		wild_type	ERR16071781		This study
S. enterica	Napoli	ISS_87/12/03	Nap87-12-03	2002	Italy	Italy	Lombardia			ITC4		Human							SAL_ZA6971AA	SAL_SB4313AA_AS	1853	60	161	163	338	178	155	12	142	205072	205072	205072	205072	205058	205058	205058	205058	106990	20879	20879	N2	1289	104	2		wild_type	ERR16071834		This study
S. enterica	Napoli	ISS_87/8/03	Nap87-8-03	2002	Italy	Italy	Lombardia			ITC4		Human							SAL_ZA6967AA	SAL_SB4309AA_AS	474	60	161	147	96	178	155	12	142	205067	205067	205067	205067	205067	137343	97218	24950	1543	1543	1543b	N2	1289	104	2		wild_type	ERR16071838		This study
S. enterica	Napoli	2003LSAL07411		2003	France	France	unknown					Animal	Livestock_Bovine						SAL_NB0671AA	SAL_VC4537AA_AS	474	60	161	147	96	178	155	12	142	314505	314505	314505	235439	235439	140611	27729	27729	27729	1543	1543a	N2	1289	104	2		wild_type	ERR9714939		This study
S. enterica	Napoli	ISS_102/1/03	Nap102-1-03	2003	Italy	Italy	Campania			ITF3		Environment							SAL_ZA6984AA	SAL_SB4326AA_AS	2019	60	161	147	348	178	155	12	142	205088	205088	205088	205088	205088	97215	20426	20426	7673	7673	7673	N1	1289	104	2		wild_type	ERR16071711		This study
S. enterica	Napoli	ISS_108/2/03	Nap108-2-03	2003	Italy	Italy	Veneto			ITH3		Human							SAL_ZA6985AA	SAL_SB4327AA_AS	2019	60	161	147	348	178	155	12	142	205086	205086	205086	205086	205086	205086	25097	25097	7673	7673	7673	N1	1289	104	2		wild_type	ERR16071714		This study
S. enterica	Napoli	ISS_108/3/03	Nap108-3-03	2003	Italy	Italy	Veneto			ITH3		Human							SAL_ZA6987AA	SAL_SB4329AA_AS	7217	60	161	163	96	178	1141	12	142	205089	205089	205089	205089	205089	205089	121759	20879	20879	20879	20879	N2	1289	104	2		wild_type	ERR16071715		This study
S. enterica	Napoli	ISS_108/4/03	Nap108-4-03	2003	Italy	Italy	Veneto			ITH3		Human							SAL_ZA6988AA	SAL_SB4330AA_AS	7220	NaN	161	163	96	178	1143	1030	142	205092	205092	205092	205092	205092	205092	205092	205092	205092	20879	20879	N2	1289	104	2		wild_type	ERR16071716		This study
S. enterica	Napoli	ISS_112/10/03	Nap112-10-03	2003	Italy	Italy	Trentino_Alto_Adige_region	Trento_province		ITH2		Human							SAL_ZA6990AA	SAL_SB4332AA_AS	7219	60	161	147	96	178	1142	12	142	205091	205091	205091	205091	205091	205091	205091	205091	1543	1543	1543b	N2	1289	104	2		wild_type	ERR16071718		This study
S. enterica	Napoli	ISS_112/32/03	Nap112-32-03	2003	Italy	Italy	Trentino_Alto_Adige_region	Trento_province		ITH2		Human							SAL_ZA6991AA	SAL_SB4333AA_AS	474	60	161	147	96	178	155	12	142	205093	205093	205093	205093	205093	205093	205093	205091	1543	1543	1543b	N2	1289	104	2		wild_type	ERR16071719		This study
S. enterica	Napoli	ISS_118/18/03	Nap118-18-03	2003	Italy	Italy	Piemonte			ITC1		Human							SAL_ZA6992AA	SAL_SB4334AA_AS	7173	60	161	147	96	NaN	155	12	142	205094	205094	205094	205094	205094	205094	107024	107024	107023	107023	107023	N1	1289	104	2		wild_type	ERR16071722		This study
S. enterica	Napoli	ISS_118/20/03	Nap118-20-03	2003	Italy	Italy	Piemonte			ITC1		Human							SAL_ZA6993AA	SAL_SB4335AA_AS	474	60	161	147	96	178	155	12	142	205096	205096	205096	205096	204891	107028	26263	24950	1543	1543	1543b	N2	1289	104	2		wild_type	ERR16071723		This study
S. enterica	Napoli	ISS_122/74/03	Nap122-74-03	2003	Italy	Italy	Trentino_Alto_Adige_region	Trento_province		ITH2		Human							SAL_ZA6994AA	SAL_SB4336AA_AS	1637	60	161	163	96	178	155	12	142	205095	205095	205095	205095	205095	205095	204900	204900	20879	20879	20879	N2	1289	104	2		wild_type	ERR16071724		This study
S. enterica	Napoli	ISS_133/1/103	Nap133-1-03	2003	Italy	Italy	Sicilia			ITG1									SAL_AB8407AA	SAL_TB8901AA_AS	4552	60	161	147	348	178	155	12	849	209753	209753	209753	209753	209753	209753	107120	107120	107120	107120	107120	N1	1289	104	2		wild_type	ERR16071725		This study
S. enterica	Napoli	ISS_133/3/03	Nap133-3-03	2003	Italy	Italy	Sicilia			ITG1		Human							SAL_ZA6996AA	SAL_SB4338AA_AS	4552	60	161	147	348	178	155	12	849	205098	205098	205098	205098	205098	205098	107120	107120	107120	107120	107120	N1	1289	104	2		wild_type	ERR16071726	CP163477,CP163478,CP163479	This study
S. enterica	Napoli	ISS_88/1/03	Nap88-1-03	2003	Italy	Italy	Veneto			ITH3		Human							SAL_ZA6972AA	SAL_SB4314AA_AS	4550	60	783	147	666	178	155	12	142	205074	205074	205074	205074	205074	205074	107080	107080	107080	1543	1543ab	N2	1289	104	2		wild_type	ERR16071841	CP163488	This study
S. enterica	Napoli	ISS_97/3/04	Nap97-3-04	2003	Italy	Italy	Lombardia			ITC4		Animal	Companion_Canine_Canis-lupus-familiaris						SAL_ZA6979AA	SAL_SB4321AA_AS	1637	60	161	163	96	178	155	12	142	205081	205081	205081	205081	205081	205081	205081	20879	20879	20879	20879	N2	1289	104	2		wild_type	ERR16071845		This study
S. enterica	Napoli	ISS_109/3/04	Nap109-3-04	2004	Italy	Italy	Lombardia			ITC4		Human							SAL_ZA6989AA	SAL_SB4331AA_AS	7218	60	161	147	948	178	155	12	142	205090	205090	205090	205090	205090	205090	24950	24950	1543	1543	1543b	N2	1289	104	2		wild_type	ERR16071717		This study
S. enterica	Napoli	ISS_136/13/04	Nap136-13-04	2004	Italy	Italy	Liguria			ITC3		Environment							SAL_ZA6997AA	SAL_SB4339AA_AS	474	60	161	147	96	178	155	12	142	205101	205101	205101	205101	205101	107028	26263	24950	1543	1543	1543b	N2	1289	104	2		wild_type	ERR16071727		This study
S. enterica	Napoli	ISS_148/10/04	Nap148-10-04	2004	Italy	Italy	Veneto			ITH3		Human							SAL_ZA6999AA	SAL_SB4341AA_AS	4549	60	161	147	96	178	155	12	847	205100	205100	205100	205100	205100	205100	107082	24950	1543	1543	1543b	N2	1289	104	2		wild_type	ERR16071730		This study
S. enterica	Napoli	ISS_148/6/04	Nap148-6-04	2004	Italy	Italy	Veneto			ITH3		Human							SAL_ZA6998AA	SAL_SB4340AA_AS	1637	60	161	163	96	178	155	12	142	205099	205099	205099	205099	205099	205099	97217	20879	20879	20879	20879	N2	1289	104	2		wild_type	ERR16071731		This study
S. enterica	Napoli	ISS_97/5/04	Nap97-5-04	2004	Italy	Italy	Lombardia			ITC4		Human							SAL_ZA6981AA	SAL_SB4323AA_AS	474	60	161	147	96	178	155	12	142	205082	205082	205082	205082	205082	205082	97218	24950	1543	1543	1543b	N2	1289	104	2		wild_type	ERR16071846		This study
S. enterica	Napoli	17-32057_S6		2005	Italy	Italy	Trentino_Alto_Adige_region					Human	Stool						SAL_NA7906AA	SAL_YA5949AA_AS	4549	60	161	147	96	178	155	12	847	107102	107102	107102	107102	107102	107102	107082	24950	1543	1543	1543b	N2	1289	104	2		wild_type	ERR2194362		Mastrorilli et al 2020
S. enterica	Napoli	ISS_100/1/05	Nap100-1-05	2005	Italy	Italy	Lombardia			ITC4		Human							SAL_ZA6983AA	SAL_SB4325AA_AS	474	60	161	147	96	178	155	12	142	205085	205085	205085	205085	137354	107044	24950	24950	1543	1543	1543b	N2	1289	104	2		wild_type	ERR16071709		This study
S. enterica	Napoli	ISS_81/25/05	Nap81-25-05	2005	Italy	Italy	Marche			ITI3		Human							SAL_ZA6954AA	SAL_SB4296AA_AS	1853	60	161	163	338	178	155	12	142	205058	205058	205058	205058	205058	205058	205058	205058	106990	20879	20879	N2	1289	104	2		wild_type	ERR16071821		This study
S. enterica	Napoli	200603318	06 3318	2006	France	France	Provence-Alpes-Cote-dAzur	06	06000 (LAM)	FRL03		Human	Stool						SAL_WA3864AA	SAL_KB9905AA_AS	5962	60	161	147	96	178	950	12	142	176348	176348	176348	176348	176348	176348	107035	24950	1543	1543	1543b	N2	1289	104	2		wild_type	ERR16083168		This study
S. enterica	Napoli	200603456	06 3456	2006	France	France	Nouvelle-Aquitaine	16	16104 (LAM)	FRI31		Human	Stool						SAL_WA3865AA	SAL_KB9906AA_AS	474	60	161	147	96	178	155	12	142	176345	176345	176345	176345	176345	140591	27733	27733	27729	1543	1543a	N2	1289	104	2		wild_type	ERR16083169		This study
S. enterica	Napoli	200603777	06 3777	2006	France	France	Occitanie	81	81013 (LAM)	FRJ27		Human	Stool						SAL_WA3815AA	SAL_KB9856AA_AS	5168	60	161	147	96	1085	155	12	142	176300	176300	176300	176300	176300	140684	140575	140575	140575	1543	1543a	N2	1289	104	2		wild_type	ERR16083170		This study
S. enterica	Napoli	200604093	06 4093	2006	France	France	Nouvelle-Aquitaine	33	33505 (LAM)	FRI12		Human	Stool						SAL_WA3814AA	SAL_KB9855AA_AS	5168	60	161	147	96	1085	155	12	142	176306	176306	176306	176306	176306	140575	140575	140575	140575	1543	1543a	N2	1289	104	2		wild_type	ERR16083171		This study
S. enterica	Napoli	200604408	06 4408	2006	France	France	Nouvelle-Aquitaine	24	24108 (LAM)	FRI11		Human	Stool						SAL_WA3816AA	SAL_KB9857AA_AS	474	60	161	147	96	178	155	12	142	176307	176307	176307	176307	176307	140576	27733	27733	27729	1543	1543a	N2	1289	104	2		wild_type	ERR16083172		This study
S. enterica	Napoli	200604487	06 4487	2006	France	France	Bretagne	56	56000 (LAM)	FRH04		Human	Stool						SAL_WA3817AA	SAL_KB9858AA_AS	474	60	161	147	96	178	155	12	142	176303	176303	176303	176303	176303	27733	27733	27733	27729	1543	1543a	N2	1289	104	2		wild_type	ERR16083173		This study
S. enterica	Napoli	200604783	06 4783	2006	France	France	Nouvelle-Aquitaine	24	24019 (LAM)	FRI11		Human	Stool						SAL_WA3818AA	SAL_KB9859AA_AS	474	60	161	147	96	178	155	12	142	176310	176310	176310	176310	176310	176310	27733	27733	27729	1543	1543a	N2	1289	104	2		wild_type	ERR16083174		This study
S. enterica	Napoli	200605014	06 5014	2006	France	France	Pays-de-la-Loire	85	85119 (LAM)	FRG05		Human	Stool						SAL_WA3389AA	SAL_KB9385AA_AS	474	60	161	147	96	178	155	12	142	176225	176225	176225	176225	176225	140643	27729	27729	27729	1543	1543a	N2	1289	104	2	blaTEM-1,sul2	wild_type	ERR16083175		This study
S. enterica	Napoli	200605335	06 5335	2006	France	France	Nouvelle-Aquitaine	16	16000 (LAM)	FRI31		Human	Stool	8		Male			SAL_WA3392AA	SAL_KB9388AA_AS	474	60	161	147	96	178	155	12	142	176232	176232	176232	176232	176232	140653	27733	27733	27729	1543	1543a	N2	1289	104	2		wild_type	ERR16083176		This study
S. enterica	Napoli	200605641	06 5641	2006	France	France	Pays-de-la-Loire	85	85800 (LAM)	FRG05		Human	Stool	8					SAL_WA3390AA	SAL_KB9386AA_AS	474	60	161	147	96	178	155	12	142	176227	176227	176227	176227	176227	140690	27729	27729	27729	1543	1543a	N2	1289	104	2		wild_type	ERR16083177		This study
S. enterica	Napoli	200606787	Nap06-6787	2006	France	France	Centre_Val-de-Loire	36	36004 (LAM)	FRB03		Human	Stool			Female			SAL_BB1113AA	SAL_VB3859AA_AS	474	60	161	147	96	178	155	12	142	214079	214079	214079	214079	214079	214079	27733	27733	27729	1543	1543a	N2	1289	104	2		wild_type	ERR16083178		This study
S. enterica	Napoli	ISS_14/14/07	Nap14-14-07	2006	Italy	Italy	Lazio			ITI4		Human							SAL_ZA6867AA	SAL_SB4195AA_AS	1853	60	161	163	338	178	155	12	142	204968	204968	204968	204968	204968	204968	106990	106990	106990	20879	20879	N2	1289	104	2		wild_type	ERR16071728		This study
S. enterica	Napoli	ISS_14/15/07	Nap14-15-07	2006	Italy	Italy	Lazio			ITI4		Human							SAL_ZA6868AA	SAL_SB4196AA_AS	7210	60	161	147	946	178	155	12	142	204969	204969	204969	204969	204969	204969	204969	107057	107057	7673	7673	N1	1289	104	2		wild_type	ERR16071729		This study
S. enterica	Napoli	SAL_9714942		2007	France	France	unknown					Environment							SAL_NB0668AA	SAL_VC4534AA_AS	474	60	161	147	96	178	155	12	142	314506	314506	314506	314506	140616	140616	140616	27729	27729	1543	1543a	N2	1289	104	2		wild_type	ERR9714942		This study
S. enterica	Napoli	2007LSAL03227		2007	France	France	Bretagne	22		FRH01		Environment	Poultry_turkey						SAL_IB5744AA	SAL_QC4032AA_AS	474	60	161	147	96	178	155	12	142	276318	276318	276318	204628	204628	204628	27729	27729	27729	1543	1543a	N2	1289	104	2		wild_type	ERR16094174		This study
S. enterica	Napoli	2007LSAL03360		2007	France	France	Pays-de-la-Loire	85		FRG05		Environment	Poultry_turkey						SAL_IB5745AA	SAL_QC4033AA_AS	474	60	161	147	96	178	155	12	142	276321	276321	276321	276321	276321	140643	27729	27729	27729	1543	1543a	N2	1289	104	2		wild_type	ERR16094175		This study
S. enterica	Napoli	2007LSAL04738		2007	France	France	Nouvelle-Aquitaine	79		FRI33		Environment	Poultry_duck						SAL_IB5747AA	SAL_QC4035AA_AS	474	60	161	147	96	178	155	12	142	276319	276319	276319	140681	124002	124002	27729	27729	27729	1543	1543a	N2	1289	104	2		wild_type	ERR16094176		This study
S. enterica	Napoli	2007LSAL05181		2007	France	France	Pays-de-la-Loire	85		FRG05		Environment	Poultry_goose						SAL_IB5748AA	SAL_QC4036AA_AS	474	60	161	147	96	178	155	12	142	276323	276323	276323	276322	124002	124002	27729	27729	27729	1543	1543a	N2	1289	104	2		wild_type	ERR16094177		This study
S. enterica	Napoli	2007LSAL05456		2007	France	France	Auvergne_Rhône-Alpes	43		FRK13		Food	pork						SAL_IB5742AA	SAL_QC4030AA_AS	474	60	161	147	96	178	155	12	142	276372	276372	276372	276372	124002	124002	27729	27729	27729	1543	1543a	N2	1289	104	2		wild_type	ERR16094178		This study
S. enterica	Napoli	2007LSAL06005		2007	France	France	Pays-de-la-Loire	85		FRG05		Environment	Poultry_duck						SAL_IB5741AA	SAL_QC4029AA_AS	474	60	161	147	96	178	155	12	142	276370	276370	276370	276370	176331	176331	27729	27729	27729	1543	1543a	N2	1289	104	2		wild_type	ERR16094179		This study
S. enterica	Napoli	2007LSAL06273		2007	France	France	Auvergne_Rhône-Alpes	26		FRK23		Animal	Poultry_goose						SAL_IB5743AA	SAL_QC4031AA_AS	474	60	161	147	96	178	155	12	142	276317	276317	276317	276317	204711	204711	27729	27729	27729	1543	1543a	N2	1289	104	2		wild_type	ERR16094180		This study
S. enterica	Napoli	17-33343_S7		2007	Italy	Italy	Friuli_Venezia_Giulia_region			ITH4		Human	Stool						SAL_NA7905AA	SAL_YA5950AA_AS	1637	60	161	163	96	178	155	12	142	107041	107041	107041	107041	107041	107041	107031	20879	20879	20879	20879	N2	1289	104	2		wild_type	ERR2194363		Mastrorilli et al 2020
S. enterica	Napoli	17-33346_S10		2007	Italy	Italy	unknown					Human							SAL_NA7904AA	SAL_YA5951AA_AS	474	60	161	147	96	178	155	12	142	107042	107042	107042	107042	107042	107042	107042	24950	1543	1543	1543b	N2	1289	104	2	aadA5,sul2,dfrA17,tet(A)	wild_type	ERR2194364		Mastrorilli et al 2020
S. enterica	Napoli	ISS_39/2/07	Nap39-2-07	2007	Italy	Italy	Lombardia			ITC4		Human							SAL_ZA6886AA	SAL_SB4214AA_AS	7213	60	161	1008	96	178	155	12	142	204988	204988	204988	204988	204988	204988	24950	24950	1543	1543	1543b	N2	1289	104	2		wild_type	ERR16071751		This study
S. enterica	Napoli	ISS_97/7/04	Nap97-7-04	2007	Italy	Italy	unknown												SAL_AB8408AA	SAL_TB8902AA_AS	474	60	161	147	96	178	155	12	142	209754	209754	209754	209754	209754	24950	24950	24950	1543	1543	1543b	N2	1289	104	2		wild_type	ERR16071847		This study
S. enterica	Napoli	UZH_2008-11850	Nap2008-11850	2008	Switzerland	Switzerland	Genferseeregion	GE	1000	CH01		Environment							SAL_ZA6770AA	SAL_SB3248AA_AS	474	60	161	147	96	178	155	12	142	204874	204874	204874	204874	204874	107029	107029	24950	1543	1543	1543b	N2	1289	104	2		wild_type	ERR16062589		This study
S. enterica	Napoli	UZH_2008-23609	Nap2008-23609	2008	Switzerland	Switzerland	Tessin	TE	6968	CH07		Human	Stool						SAL_ZA6771AA	SAL_SB3249AA_AS	474	60	161	147	96	178	155	12	142	204875	204875	204875	204875	204875	24950	24950	24950	1543	1543	1543b	N2	1289	104	2		wild_type	ERR16062590		This study
S. enterica	Napoli	UZH_2008-30207	Nap2008-30207	2008	Switzerland	Switzerland	Nordwestschweiz	NW	5000	CH03		Environment	Surface_water;Aare river, Aarau						SAL_ZA6772AA	SAL_SB3264AA_AS	474	60	161	147	96	178	155	12	142	204873	204873	204873	204873	204873	204873	204873	204873	204873	1543	1543a	N2	1289	104	2		wild_type	ERR16062591		This study
S. enterica	Napoli	UZH_2008-30208	Nap2008-30208	2008	Switzerland	Switzerland	Nordwestschweiz	NW	5000	CH03		Environment	Surface_water;Aare river, Aarau						SAL_ZA6773AA	SAL_SB3265AA_AS	474	60	161	147	96	178	155	12	142	204876	204876	204876	204873	204873	204873	204873	204873	204873	1543	1543a	N2	1289	104	2		wild_type	ERR16062592		This study
S. enterica	Napoli	UZH_2008-30210	Nap2008-30210	2008	Switzerland	Switzerland	Nordwestschweiz	NW	5000	CH03		Environment	Surface_water;Aare river, Aarau						SAL_ZA6774AA	SAL_SB3266AA_AS	474	60	161	147	96	178	155	12	142	204877	204877	204873	204873	204873	204873	204873	204873	204873	1543	1543a	N2	1289	104	2		wild_type	ERR16062593		This study
S. enterica	Napoli	17-33354_S9		2008	Italy	Italy	Trentino_Alto_Adige_region					Human	Stool						SAL_NA7902AA	SAL_YA5953AA_AS	2095	60	161	147	151	178	155	12	142	107040	107040	107040	107040	26646	1450	1450	1450	1450	1450	1450	N1	1289	104	2		wild_type	ERR2194366		Mastrorilli et al 2020
S. enterica	Napoli	17-33356_S10		2008	Italy	Italy	Marche			ITI3		Environment							SAL_NA7900AA	SAL_YA5955AA_AS	1637	60	161	163	96	178	155	12	142	107037	107037	107037	107037	107037	107037	107037	20879	20879	20879	20879	N2	1289	104	2		wild_type	ERR2194368		Mastrorilli et al 2020
S. enterica	Napoli	17-33379_S27		2008	Italy	Italy	Veneto			ITH3		Environment							SAL_NA7883AA	SAL_YA5972AA_AS	1637	60	161	163	96	178	155	12	142	107085	107085	107085	107085	107085	107041	107031	20879	20879	20879	20879	N2	1289	104	2		wild_type	ERR2194385		Mastrorilli et al 2020
S. enterica	Napoli	ISS_82/13/08	Nap82-13-08	2008	Italy	Italy	Lombardia			ITC4		Human							SAL_ZA6957AA	SAL_SB4299AA_AS	474	60	161	147	96	178	155	12	142	205061	205061	205061	205061	205061	24950	24950	24950	1543	1543	1543b	N2	1289	104	2		wild_type	ERR16071823		This study
S. enterica	Napoli	UZH_2009-609	Nap2009-609	2009	Switzerland	Switzerland	Tessin	TE	6501	CH07		Human	Stool						SAL_ZA6776AA	SAL_SB3268AA_AS	474	60	161	147	96	178	155	12	142	204879	204879	204879	204879	204879	24950	24950	24950	1543	1543	1543b	N2	1289	104	2		wild_type	ERR16062594		This study
S. enterica	Napoli	UZH_2009-773	Nap2009-773	2009	Switzerland	Italy	Zentralschweiz	ZS	6440	CH06		Human	Stool						SAL_ZA6775AA	SAL_SB3267AA_AS	2008	60	161	147	348	178	155	436	142	204878	204878	169198	169198	169198	7673	7673	7673	7673	7673	7673	N1	1289	104	2		wild_type	ERR16062595		This study
S. enterica	Napoli	UZH_2009-776	NapN9-776/N09-0776	2009	Switzerland	Switzerland	Tessin	TE	6500	CH07		Human	Stool						SAL_ZA6777AA	SAL_SB3269AA_AS	474	60	161	147	96	178	155	12	142	204882	204882	204882	204882	204882	137319	97218	24950	1543	1543	1543b	N2	1289	104	2		wild_type	ERR16062596		This study
S. enterica	Napoli	UZH_2009-849	Nap2009-849	2009	Switzerland	Switzerland	Nordwestschweiz	NW	4147	CH03		Human	Stool						SAL_ZA6778AA	SAL_SB3284AA_AS	474	60	161	147	96	178	155	12	142	204880	204880	204880	204880	204868	204868	97218	24950	1543	1543	1543b	N2	1289	104	2		wild_type	ERR16062597		This study
S. enterica	Napoli	UZH_2009-856	Nap2009-856	2009	Switzerland	Switzerland	Espace Mittelland	EM	3008	CH02		Animal	Companion_Canine_Canis-lupus-familiaris_stool						SAL_ZA6779AA	SAL_SB3285AA_AS	474	60	161	147	96	178	155	12	142	204881	204881	204881	204881	204879	24950	24950	24950	1543	1543	1543b	N2	1289	104	2		wild_type	ERR16062598		This study
S. enterica	Napoli	UZH_2009-943	NapN9-943/N09-0943	2009	Switzerland	Switzerland	Tessin	TE	6930	CH07		Human	Stool						SAL_ZA6780AA	SAL_SB3286AA_AS	474	60	161	147	96	178	155	12	142	204883	204883	204883	204883	204883	24950	24950	24950	1543	1543	1543b	N2	1289	104	2		wild_type	ERR16062599		This study
S. enterica	Napoli	UZH_N09-1192	NapN9-1192	2009	Switzerland	Switzerland	Espace Mittelland	EM	2800	CH02		Environment	Water/River						SAL_ZA6784AA	SAL_SB3290AA_AS	474	60	161	147	96	178	155	12	142	204888	204888	204888	204888	204888	204888	204873	204873	204873	1543	1543a	N2	1289	104	2		wild_type	ERR16062600		This study
S. enterica	Napoli	UZH_N09-1468	NapN9-1468	2009	Switzerland	Switzerland	Tessin	TE	6932	CH07		Human	Stool						SAL_ZA6783AA	SAL_SB3289AA_AS	474	60	161	147	96	178	155	12	142	204886	204886	204886	204886	204886	204886	204886	24950	1543	1543	1543b	N2	1289	104	2		wild_type	ERR16062601		This study
S. enterica	Napoli	UZH_N09-2000	NapN9-2000	2009	Switzerland	Switzerland	Tessin	TE	6915	CH07		Human	Stool						SAL_ZA6786AA	SAL_SB3306AA_AS	474	60	161	147	96	178	155	12	142	204890	204890	204890	204890	204886	204886	204886	24950	1543	1543	1543b	N2	1289	104	2		wild_type	ERR16062602		This study
S. enterica	Napoli	200903496	Nap09-3496	2009	France	France	Pays-de-la-Loire	44	44670	FRG01		Human	Stool	6		Female	47	Isolated	SAL_BB1115AA	SAL_VB3861AA_AS	474	60	161	147	96	178	155	12	142	214087	214087	214087	214087	124002	124002	27729	27729	27729	1543	1543a	N2	1289	104	2		wild_type	ERR16083179		This study
S. enterica	Napoli	200903935	Nap09-3935	2009	France	France	Pays-de-la-Loire	44	44170	FRG01		Human	Stool	6		Male	F	Isolated	SAL_BB1116AA	SAL_VB3862AA_AS	474	60	161	147	96	178	155	12	142	214082	214082	214082	214082	214082	214082	214082	27729	27729	1543	1543a	N2	1289	104	2		wild_type	ERR16083180		This study
S. enterica	Napoli	200904194	Nap09-4194	2009	France	France	Pays-de-la-Loire	49	49520	FRG02		Human	Stool	7		Female	42	Collective food poisoning [27june 2009; district 37]	SAL_BB1117AA	SAL_VB3863AA_AS	474	60	161	147	96	178	155	12	142	214088	214088	214088	214088	140619	27733	27733	27733	27729	1543	1543a	N2	1289	104	2		wild_type	ERR16083181		This study
S. enterica	Napoli	200904208	Nap09-4208	2009	France	France	Centre_Val-de-Loire	37	37510	FRB04		Human	Stool	6		Male	2	Collective food poisoning [27june 2009; district 37]	SAL_BB1118AA	SAL_VB3864AA_AS	474	60	161	147	96	178	155	12	142	214084	214084	214084	214084	214084	27729	27729	27729	27729	1543	1543a	N2	1289	104	2		wild_type	ERR16083182		This study
S. enterica	Napoli	200904209	Nap09-4209	2009	France	France	Centre_Val-de-Loire	37	92100	FRB04		Human	Stool	7		Male	63	Collective food poisoning [27june 2009; district 37]	SAL_BB1121AA	SAL_VB3867AA_AS	474	60	161	147	96	178	155	12	142	214089	214089	214089	214084	214084	27729	27729	27729	27729	1543	1543a	N2	1289	104	2		wild_type	ERR16083183		This study
S. enterica	Napoli	200904290	Nap09-4290	2009	France	France	Pays-de-la-Loire	44	44450	FRG01		Human	Stool	7		Female		Collective food poisoning [27june 2009; district 37]	SAL_BB1119AA	SAL_VB3865AA_AS	474	60	161	147	96	178	155	12	142	214086	214086	214086	214086	124002	124002	27729	27729	27729	1543	1543a	N2	1289	104	2		wild_type	ERR16083184		This study
S. enterica	Napoli	200904306	Nap09-4306bis	2009	France	France	Ile-de-France	92	92100 (LAM)	FR105		Human	Stool	7		Male	6	Collective food poisoning [27june 2009; district 37]	SAL_BB1120AA	SAL_VB3866AA_AS	474	60	161	147	96	178	155	12	142	214085	214085	214085	214085	214084	27729	27729	27729	27729	1543	1543a	N2	1289	104	2		wild_type	ERR16084280		This study
S. enterica	Napoli	17-33358_S11		2009	Italy	Italy	Piemonte			ITC1		Human	Stool						SAL_NA7899AA	SAL_YA5956AA_AS	2095	60	161	147	151	178	155	12	142	107096	107096	107096	107096	107096	107096	107096	107096	107096	1450	1450	N1	1289	104	2		wild_type	ERR2194369		Mastrorilli et al 2020
S. enterica	Napoli	17-33360_S15		2009	Italy	Italy	Piemonte			ITC1		Human	Stool						SAL_NA7898AA	SAL_YA5957AA_AS	474	60	161	147	96	178	155	12	142	107038	107038	97218	97218	97218	97218	97218	24950	1543	1543	1543b	N2	1289	104	2		wild_type	ERR2194370		Mastrorilli et al 2020
S. enterica	Napoli	17-33361_S12		2009	Italy	Italy	Calabria			ITF6		Human	Stool						SAL_NA7897AA	SAL_YA5958AA_AS	474	60	161	147	96	178	155	12	142	107036	107036	107036	107036	107036	107036	107023	107023	107023	107023	107023	N1	1289	104	2		wild_type	ERR2194371		Mastrorilli et al 2020
S. enterica	Napoli	17-33363_S13		2009	Italy	Italy	Calabria			ITF6		Human	Stool						SAL_NA7896AA	SAL_YA5959AA_AS	474	60	161	147	96	178	155	12	142	107094	107094	107068	107068	107068	107068	107059	107059	107023	107023	107023	N1	1289	104	2		wild_type	ERR2194372		Mastrorilli et al 2020
S. enterica	Napoli	17-33364_S14		2009	Italy	Italy	Marche			ITI3		Human	Stool						SAL_NA7895AA	SAL_YA5960AA_AS	474	60	161	147	96	178	155	12	142	107093	107093	107093	107093	107093	107093	107093	24950	1543	1543	1543b	N2	1289	104	2		wild_type	ERR2194373		Mastrorilli et al 2020
S. enterica	Napoli	17-33365_S16		2009	Italy	Italy	Piemonte			ITC1		Environment							SAL_NA7894AA	SAL_YA5961AA_AS	474	60	161	147	96	178	155	12	142	107091	107091	107091	107091	107091	107084	107084	24950	1543	1543	1543b	N2	1289	104	2		wild_type	ERR2194374		Mastrorilli et al 2020
S. enterica	Napoli	17-33366_S17		2009	Italy	Italy	Piemonte			ITC1		Environment							SAL_NA7893AA	SAL_YA5962AA_AS	474	60	161	147	96	178	155	12	142	107097	107097	107097	107097	107097	107089	97218	24950	1543	1543	1543b	N2	1289	104	2		wild_type	ERR2194375		Mastrorilli et al 2020
S. enterica	Napoli	17-33367_S18		2009	Italy	Italy	Piemonte			ITC1		Environment							SAL_NA7892AA	SAL_YA5963AA_AS	474	60	161	147	96	178	155	12	142	107273	107273	107273	107273	107273	107089	97218	24950	1543	1543	1543b	N2	1289	104	2		wild_type	ERR2194376		Mastrorilli et al 2020
S. enterica	Napoli	17-33368_S26		2009	Italy	Italy	Calabria			ITF6		Human	Stool						SAL_NA7891AA	SAL_YA5964AA_AS	474	60	161	147	96	178	155	12	142	107267	107267	107065	107065	107065	107064	107024	107024	107023	107023	107023	N1	1289	104	2		wild_type	ERR2194377		Mastrorilli et al 2020
S. enterica	Napoli	17-33369_S19		2009	Italy	Italy	Piemonte			ITC1		Environment							SAL_NA7890AA	SAL_YA5965AA_AS	474	60	161	147	96	178	155	12	142	107090	107090	107090	107090	107090	107089	97218	24950	1543	1543	1543b	N2	1289	104	2		wild_type	ERR2194378		Mastrorilli et al 2020
S. enterica	Napoli	17-33371_S20		2009	Italy	Italy	Piemonte			ITC1		Environment							SAL_NA7889AA	SAL_YA5966AA_AS	-499	60	161	147	-47	178	155	12	142	107089	107089	107089	107089	107089	107089	97218	24950	1543	1543	1543b	N2	1289	104	2		wild_type	ERR2194379		Mastrorilli et al 2020
S. enterica	Napoli	17-33373_S21		2009	Italy	Italy	Piemonte			ITC1		Human	Stool						SAL_NA7888AA	SAL_YA5967AA_AS	474	60	161	147	96	178	155	12	142	107088	107088	107088	107088	107088	107088	107035	24950	1543	1543	1543b	N2	1289	104	2		wild_type	ERR2194380		Mastrorilli et al 2020
S. enterica	Napoli	17-33374_S22		2009	Italy	Italy	Piemonte			ITC1		Environment							SAL_NA7887AA	SAL_YA5968AA_AS	474	60	161	147	96	178	155	12	142	107098	107098	107098	107098	107098	107084	107084	24950	1543	1543	1543b	N2	1289	104	2		wild_type	ERR2194381		Mastrorilli et al 2020
S. enterica	Napoli	17-33375_S23		2009	Italy	Italy	Piemonte			ITC1		Environment							SAL_NA7886AA	SAL_YA5969AA_AS	474	60	161	147	96	178	155	12	142	107086	107086	107086	107086	107086	107084	107084	24950	1543	1543	1543b	N2	1289	104	2		wild_type	ERR2194382		Mastrorilli et al 2020
S. enterica	Napoli	17-33376_S24		2009	Italy	Italy	Piemonte			ITC1		Environment							SAL_NA7885AA	SAL_YA5970AA_AS	474	60	161	147	96	178	155	12	142	107084	107084	107084	107084	107084	107084	107084	24950	1543	1543	1543b	N2	1289	104	2		wild_type	ERR2194383		Mastrorilli et al 2020
S. enterica	Napoli	17-33377_S25		2009	Italy	Italy	Calabria			ITF6		Human	Stool						SAL_NA7884AA	SAL_YA5971AA_AS	474	60	161	147	96	178	155	12	142	107095	107095	107095	107066	107066	107024	107024	107024	107023	107023	107023	N1	1289	104	2		wild_type	ERR2194384		Mastrorilli et al 2020
S. enterica	Napoli	17-33381_S28		2009	Italy	Italy	Veneto			ITH3		Environment							SAL_NA7882AA	SAL_YA5973AA_AS	1637	60	161	163	96	178	155	12	142	107148	107148	107148	107148	107148	107148	107148	20879	20879	20879	20879	N2	1289	104	2		wild_type	ERR2194386		Mastrorilli et al 2020
S. enterica	Napoli	ISS_38/22/09	Nap38-22-09	2009	Italy	Italy	Trentino_Alto_Adige_region	Trento_province		ITH2		Human							SAL_ZA6885AA	SAL_SB4213AA_AS	2008	60	161	147	348	178	155	436	142	204994	204994	204994	204994	204994	20408	7673	7673	7673	7673	7673	N1	1289	104	2		wild_type	ERR16071750		This study
S. enterica	Napoli	ISS_51/1/09	Nap51-1-09	2009	Italy	Italy	Trentino_Alto_Adige_region	Trento_province		ITH2		Human							SAL_ZA6901AA	SAL_SB4229AA_AS	474	60	161	147	96	178	155	12	142	205007	205007	205007	205007	205007	205007	107029	24950	1543	1543	1543b	N2	1289	104	2		wild_type	ERR16071768		This study
S. enterica	Napoli	ISS_67/13/09	Nap67-13-09	2009	Italy	Italy	Lazio			ITI4		Human							SAL_ZA6933AA	SAL_SB4275AA_AS	1637	60	161	163	96	178	155	12	142	205043	205043	205043	205043	205043	205043	121759	20879	20879	20879	20879	N2	1289	104	2		wild_type	ERR16071797		This study
S. enterica	Napoli	ISS_67/2/09	Nap67-2-09	2009	Italy	Italy	Lazio			ITI4		Human							SAL_ZA6930AA	SAL_SB4272AA_AS	1637	60	161	163	96	178	155	12	142	205032	205032	205032	205032	205032	205032	107074	20879	20879	20879	20879	N2	1289	104	2		wild_type	ERR16071850	CP163491	This study
S. enterica	Napoli	ISS_67/3/09	Nap67-3-09	2009	Italy	Italy	Lazio			ITI4		Human							SAL_ZA6931AA	SAL_SB4273AA_AS	1637	60	161	163	96	178	155	12	142	205038	205038	205038	205038	205038	107037	107037	20879	20879	20879	20879	N2	1289	104	2		wild_type	ERR16071799		This study
S. enterica	Napoli	20102109	S20102109	2010	Spain	Spain	Cantabria	Cantabria		ES130		Animal	Bivalve_wild_Raw_clams	6	8			Isolated	SAL_QB4514AA	SAL_ZC4334AA_AS	474	60	161	147	96	178	155	12	142	343814	343813	343813	343813	343813	343813	343813	343813	343813	1543	1543c	N2	1289	104	2		wild_type	ERR16088447		This study
S. enterica	Napoli	20102110	S20102110	2010	Spain	Spain	Cantabria	Cantabria		ES130		Animal	Bivalve_wild_Raw_clams	6	8			Isolated	SAL_QB4515AA	SAL_ZC4335AA_AS	474	60	161	147	96	178	155	12	142	343813	343813	343813	343813	343813	343813	343813	343813	343813	1543	1543c	N2	1289	104	2		wild_type	ERR16088448		This study
S. enterica	Napoli	20103283	S20103283	2010	Spain	Spain	Cantabria	Cantabria		ES130		Animal	Bivalve_wild_Raw_clams	9	6			Isolated	SAL_QB4516AA	SAL_ZC4336AA_AS	474	60	161	147	96	178	155	12	142	343815	343815	343815	343815	343815	343813	343813	343813	343813	1543	1543c	N2	1289	104	2		wild_type	ERR16088449		This study
S. enterica	Napoli	UZH_N10-0590	NapN10-590	2010	Switzerland	Italy	Tessin	TE	5314	CH07		Human	Stool						SAL_ZA6785AA	SAL_SB3305AA_AS	2095	60	161	147	151	178	155	12	142	204887	204887	204887	204887	204887	204887	1748	1748	1450	1450	1450	N1	1289	104	2		wild_type	ERR16062603		This study
S. enterica	Napoli	UZH_N10-0689	NapN10-689	2010	Switzerland	Switzerland	Tessin	TE	6598	CH07		Human	Stool						SAL_ZA6787AA	SAL_SB3307AA_AS	474	60	161	147	96	178	155	12	142	204889	204889	204889	204889	204889	137319	97218	24950	1543	1543	1543b	N2	1289	104	2		wild_type	ERR16062604		This study
S. enterica	Napoli	UZH_N10-1169	NapN10-1169	2010	Switzerland	Switzerland	Tessin	TE	6821	CH07		Human	Stool						SAL_ZA6788AA	SAL_SB3308AA_AS	474	60	161	147	96	178	155	12	142	204893	204893	204893	204893	204893	137319	97218	24950	1543	1543	1543b	N2	1289	104	2		wild_type	ERR16062605		This study
S. enterica	Napoli	UZH_N10-1602	NapN10-1602	2010	Switzerland	Switzerland	Genferseeregion	GE	1205	CH01		Human	Stool						SAL_ZA6789AA	SAL_SB3309AA_AS	474	60	161	147	96	178	155	12	142	204891	204891	204891	204891	204891	107028	26263	24950	1543	1543	1543b	N2	1289	104	2		wild_type	ERR16062606		This study
S. enterica	Napoli	UZH_N10-1675	NapN10-1675	2010	Switzerland	Italy	Genferseeregion	GE	1205	CH01		Human	Blood						SAL_ZA6790AA	SAL_SB3310AA_AS	2095	60	161	147	151	178	155	12	142	204892	204892	204892	204892	107045	1450	1450	1450	1450	1450	1450	N1	1289	104	2		wild_type	ERR16062607		This study
S. enterica	Napoli	UZH_N10-1835	NapN10-1835	2010	Switzerland	Switzerland	Nordwestschweiz	NW	5033	CH03		Human	Stool						SAL_ZA6791AA	SAL_SB3325AA_AS	474	60	161	147	96	178	155	12	142	204894	204894	204894	204894	204879	24950	24950	24950	1543	1543	1543b	N2	1289	104	2		wild_type	ERR16062608		This study
S. enterica	Napoli	UZH_N10-2278	NapN10-2278	2010	Switzerland	Switzerland	Zürich	ZH	8051	CH04		Human	Stool						SAL_ZA6792AA	SAL_SB3326AA_AS	474	60	161	147	96	178	155	12	142	204896	204894	204894	204894	204879	24950	24950	24950	1543	1543	1543b	N2	1289	104	2		wild_type	ERR16062609		This study
S. enterica	Napoli	201007156	Nap10-7156	2010	France	France	Nouvelle-Aquitaine	87		FRI23		Environment	Water-River						SAL_BB1122AA	SAL_VB3868AA_AS	474	60	161	147	96	178	155	12	142	214093	214093	214093	214093	214093	214079	27733	27733	27729	1543	1543a	N2	1289	104	2		wild_type	ERR16083417		This study
S. enterica	Napoli	201007157	Nap10-7157	2010	France	France	Nouvelle-Aquitaine	87		FRI23		Environment	Water-River						SAL_BB1111AA	SAL_VB3857AA_AS	474	60	161	147	96	178	155	12	142	214080	214080	214080	214080	214079	214079	27733	27733	27729	1543	1543a	N2	1289	104	2		wild_type	ERR16083418		This study
S. enterica	Napoli	17-33386_S31		2010	Italy	Italy	Piemonte			ITC1		Environment							SAL_NA7878AA	SAL_YA5977AA_AS	474	60	161	147	96	178	155	12	142	107128	107128	107128	107128	107128	107128	97218	24950	1543	1543	1543b	N2	1289	104	2		wild_type	ERR2194390		Mastrorilli et al 2020
S. enterica	Napoli	17-33388_S32		2010	Italy	Italy	Piemonte			ITC1		Environment							SAL_NA7877AA	SAL_YA5978AA_AS	474	60	161	147	96	178	155	12	142	107127	107127	107127	107127	107127	107089	97218	24950	1543	1543	1543b	N2	1289	104	2		wild_type	ERR2194391		Mastrorilli et al 2020
S. enterica	Napoli	17-33390_S33		2010	Italy	Italy	Piemonte			ITC1		Environment							SAL_NA7876AA	SAL_YA5979AA_AS	474	60	161	147	96	178	155	12	142	107092	107092	107092	107092	107092	107092	24950	24950	1543	1543	1543b	N2	1289	104	2		wild_type	ERR2194392		Mastrorilli et al 2020
S. enterica	Napoli	17-33391_S1		2010	Italy	Italy	Piemonte			ITC1		Human							SAL_NA7875AA	SAL_YA5980AA_AS	474	60	161	147	96	178	155	12	142	107083	107083	107083	107083	107083	107076	107035	24950	1543	1543	1543b	N2	1289	104	2		wild_type	ERR2194393		Mastrorilli et al 2020
S. enterica	Napoli	17-33394_S2		2010	Italy	Italy	Trentino_Alto_Adige_region					Human	Stool						SAL_NA7874AA	SAL_YA5981AA_AS	4549	60	161	147	96	178	155	12	847	107082	107082	107082	107082	107082	107082	107082	24950	1543	1543	1543b	N2	1289	104	2		wild_type	ERR2194394		Mastrorilli et al 2020
S. enterica	Napoli	17-33395_S3		2010	Italy	Italy	Marche			ITI3		Environment							SAL_NA7873AA	SAL_YA5982AA_AS	1637	60	161	163	96	178	155	12	142	107081	107081	107081	107081	107081	107081	107081	20879	20879	20879	20879	N2	1289	104	2		wild_type	ERR2194395		Mastrorilli et al 2020
S. enterica	Napoli	17-33396_S4		2010	Italy	Italy	Marche			ITI3		Environment							SAL_NA7872AA	SAL_YA5983AA_AS	1637	60	161	163	96	178	155	12	142	107075	107075	107075	107075	107075	107037	107037	20879	20879	20879	20879	N2	1289	104	2		wild_type	ERR2194396		Mastrorilli et al 2020
S. enterica	Napoli	17-33398_S5		2010	Italy	Italy	unknown					Human							SAL_NA7871AA	SAL_YA5984AA_AS	474	60	161	147	96	178	155	12	142	107076	107076	107076	107076	107076	107076	107035	24950	1543	1543	1543b	N2	1289	104	2		wild_type	ERR2194397		Mastrorilli et al 2020
S. enterica	Napoli	17-33399_S6		2010	Italy	Italy	Veneto			ITH3		Environment							SAL_NA7870AA	SAL_YA5985AA_AS	4550	60	783	147	666	178	155	12	142	107080	107080	107080	107080	107080	107080	107080	107080	107080	1543	1543ab	N2	1289	104	2		wild_type	ERR2194398		Mastrorilli et al 2020
S. enterica	Napoli	ISS_17/1/11	Nap17-1-11	2010	Italy	Italy	Campania			ITF3		Environment	Water-irrigation						SAL_ZA6869AA	SAL_SB4197AA_AS	7211	60	161	147	151	NaN	155	12	142	204974	204974	204974	204974	204974	1450	1450	1450	1450	1450	1450	N1	1289	104	2		wild_type	ERR16071732		This study
S. enterica	Napoli	ISS_17/2/11	Nap17-2-11	2010	Italy	Italy	Campania			ITF3		Environment	Water-irrigation						SAL_ZA6870AA	SAL_SB4198AA_AS	2101	60	495	147	348	178	155	436	142	204977	204977	204977	204977	204977	20403	20403	7673	7673	7673	7673	N1	1289	104	2		wild_type	ERR16071733		This study
S. enterica	Napoli	ISS_17/4/11	Nap17-4-11	2010	Italy	Italy	Campania			ITF3		Environment	Water-irrigation						SAL_ZA6871AA	SAL_SB4199AA_AS	2019	60	161	147	348	178	155	12	142	204970	204970	204970	129449	129449	129449	20426	20426	7673	7673	7673	N1	1289	104	2		wild_type	ERR16071734		This study
S. enterica	Napoli	ISS_17/6/11	Nap17-6-11	2010	Italy	Italy	Campania			ITF3		Environment	Water-irrigation						SAL_ZA6872AA	SAL_SB4200AA_AS	2019	60	161	147	348	178	155	12	142	204976	204976	204976	204976	204976	20426	20426	20426	7673	7673	7673	N1	1289	104	2		wild_type	ERR16071735		This study
S. enterica	Napoli	ISS_30/7/11	Nap30-7-11	2010	Italy	Italy	Campania			ITF3		Environment	Water-irrigation						SAL_ZA6879AA	SAL_SB4207AA_AS	2008	60	161	147	348	178	155	436	142	204981	204981	204981	204981	25000	20403	20403	7673	7673	7673	7673	N1	1289	104	2		wild_type	ERR16071745		This study
S. enterica	Napoli	ISS_30/9/11	Nap30-9-11	2010	Italy	Italy	Campania			ITF3		Food	Vegetable						SAL_ZA6882AA	SAL_SB4210AA_AS	2008	60	161	147	348	178	155	436	142	204985	204985	204985	204985	204985	204985	204985	7673	7673	7673	7673	N1	1289	104	2		wild_type	ERR16071747		This study
S. enterica	Napoli	ISS_80/7/10	Nap80-7-10	2010	Italy	Italy	Lombardia			ITC4		Human							SAL_ZA6949AA	SAL_SB4291AA_AS	474	60	161	147	96	178	155	12	142	205055	205055	205055	205055	205055	205055	205055	24950	1543	1543	1543b	N2	1289	104	2		wild_type	ERR16071818		This study
S. enterica	Napoli	ISS_80/8/10	Nap80-8-10	2010	Italy	Italy	Lombardia			ITC4		Human							SAL_ZA6951AA	SAL_SB4293AA_AS	474	60	161	147	96	178	155	12	142	205053	205053	205053	205053	205053	205053	24950	24950	1543	1543	1543b	N2	1289	104	2		wild_type	ERR16071819		This study
S. enterica	Napoli	ISS_82/5/10	Nap82-5-10	2010	Italy	Italy	Campania			ITF3		Environment	Water-irrigation						SAL_ZA6955AA	SAL_SB4297AA_AS	2101	60	495	147	348	178	155	436	142	205059	205059	205059	205059	205059	20403	20403	7673	7673	7673	7673	N1	1289	104	2		wild_type	ERR16071825		This study
S. enterica	Napoli	ISS_82/7/10	Nap82-7-10	2010	Italy	Italy	Campania			ITF3		Environment	Water-irrigation						SAL_ZA6956AA	SAL_SB4298AA_AS	2008	60	161	147	348	178	155	436	142	205056	205056	205056	205056	205056	20403	20403	7673	7673	7673	7673	N1	1289	104	2		wild_type	ERR16071826	CP163492	This study
S. enterica	Napoli	20161543	S20161543	2011	Spain	Spain	Asturias	Asturias		ES120		Human	Urine	9	19	Male	92	Isolated	SAL_QB5605AA	SAL_ZC5496AA_AS	474	60	161	147	96	178	155	12	142	344886	344886	344886	344886	344886	343813	343813	343813	343813	1543	1543c	N2	1289	104	2		wild_type	ERR16088471		This study
S. enterica	Napoli	20161544	S20161544	2011	Spain	Spain	Asturias	Asturias		ES120		Human	Stool	8	25	Male	92	Isolated	SAL_QB5598AA	SAL_ZC5489AA_AS	474	60	161	147	96	178	155	12	142	344888	344888	344886	344886	344886	343813	343813	343813	343813	1543	1543c	N2	1289	104	2		wild_type	ERR16088472		This study
S. enterica	Napoli	UZH_N11-0706	NapN11-0706	2011	Switzerland	Italy	Genferseeregion	GE	3963	CH01		Human	Stool						SAL_ZA6793AA	SAL_SB3327AA_AS	2019	60	161	147	348	178	155	12	142	204895	204895	204895	204895	204895	106986	20425	7673	7673	7673	7673	N1	1289	104	2		wild_type	ERR16062610		This study
S. enterica	Napoli	UZH_N11-0822	NapN11-0822	2011	Switzerland	Italy	Tessin	TE	6934	CH07		Human	Stool						SAL_ZA6794AA	SAL_SB3328AA_AS	4277	60	759	147	151	178	155	12	142	204898	204898	204898	204898	204898	204898	204898	88024	88024	1450	1450	N1	1289	104	2		wild_type	ERR16062611		This study
S. enterica	Napoli	UZH_N11-1006	NapN11-1006	2011	Switzerland	Switzerland	Nordwestschweiz	NW	4053	CH03		Human	Stool						SAL_ZA6795AA	SAL_SB3329AA_AS	474	60	161	147	96	178	155	12	142	204899	204899	204899	204899	140601	107128	97218	24950	1543	1543	1543b	N2	1289	104	2		wild_type	ERR16062612		This study
S. enterica	Napoli	UZH_N11-1154	NapN11-1154	2011	Switzerland	Switzerland	Nordwestschweiz	NW	4303	CH03		Human	Stool						SAL_ZA6796AA	SAL_SB3330AA_AS	474	60	161	147	96	178	155	12	142	204897	204897	204897	204897	204897	204886	204886	24950	1543	1543	1543b	N2	1289	104	2		wild_type	ERR16062613		This study
S. enterica	Napoli	UZH_N11-1159	NapN11-1159	2011	Switzerland	Italy	Zentralschweiz	ZS	6060	CH06		Human	Stool						SAL_ZA6797AA	SAL_SB3331AA_AS	1637	60	161	163	96	178	155	12	142	204900	204900	204900	204900	204900	204900	204900	204900	20879	20879	20879	N2	1289	104	2		wild_type	ERR16062614		This study
S. enterica	Napoli	UZH_N11-1811	NapN11-1811	2011	Switzerland	Switzerland	Espace Mittelland	EM	3008	CH02		Human	Stool						SAL_ZA6798AA	SAL_SB3346AA_AS	474	60	161	147	96	178	155	12	142	204901	204901	204901	204901	204886	204886	204886	24950	1543	1543	1543b	N2	1289	104	2		wild_type	ERR16062615		This study
S. enterica	Napoli	UZH_N11-2253	NapN11-2253	2011	Switzerland	Switzerland	Tessin	TE	6925	CH07		Human	Ovary_cyste						SAL_ZA6799AA	SAL_SB3347AA_AS	474	60	161	147	96	178	155	12	142	204902	204902	204902	204902	204902	137319	97218	24950	1543	1543	1543b	N2	1289	104	2		wild_type	ERR16062616		This study
S. enterica	Napoli	17-106735_S22		2011	Italy	Italy	unknown					Human							SAL_NA7909AA	SAL_YA5946AA_AS	4548	60	161	710	96	178	155	12	142	107044	107044	107044	107044	107044	107044	24950	24950	1543	1543	1543b	N2	1289	104	2		wild_type	ERR2194359		Mastrorilli et al 2020
S. enterica	Napoli	17-33402_S7		2011	Italy	Italy	Marche			ITI3		Environment							SAL_NA7869AA	SAL_YA5986AA_AS	1637	60	161	163	96	178	155	12	142	107079	107079	107079	107079	107079	107079	107079	20879	20879	20879	20879	N2	1289	104	2		wild_type	ERR2194399		Mastrorilli et al 2020
S. enterica	Napoli	17-33403_S8		2011	Italy	Italy	Marche			ITI3		Environment							SAL_NA7868AA	SAL_YA5987AA_AS	1637	60	161	163	96	178	155	12	142	107074	107074	107074	107074	107074	107074	107074	20879	20879	20879	20879	N2	1289	104	2		wild_type	ERR2194400		Mastrorilli et al 2020
S. enterica	Napoli	17-33404_S9		2011	Italy	Italy	Marche			ITI3		Environment							SAL_NA7867AA	SAL_YA5988AA_AS	1637	60	161	163	96	178	155	12	142	107077	107077	107077	107077	107077	107074	107074	20879	20879	20879	20879	N2	1289	104	2		wild_type	ERR2194401		Mastrorilli et al 2020
S. enterica	Napoli	2528-2011_S10		2011	Italy	Italy	Veneto			ITH3		Food	Seafood						SAL_NA7866AA	SAL_YA5989AA_AS	1637	60	161	163	96	178	155	12	142	107126	107126	107126	107126	107126	107031	107031	20879	20879	20879	20879	N2	1289	104	2		wild_type	ERR2194402		Mastrorilli et al 2020
S. enterica	Napoli	2606-2011_S11		2011	Italy	Italy	Veneto			ITH3		Food							SAL_NA7865AA	SAL_YA5990AA_AS	2019	60	161	147	348	178	155	12	142	107125	97215	97215	97215	97215	97215	20426	20426	7673	7673	7673	N1	1289	104	2		wild_type	ERR2194403		Mastrorilli et al 2020
S. enterica	Napoli	3013-2011_S12		2011	Italy	Italy	Veneto			ITH3		Animal	Poultry						SAL_NA7864AA	SAL_YA5991AA_AS	474	60	161	147	96	178	155	12	142	107124	107124	107124	107124	107124	107029	107029	24950	1543	1543	1543b	N2	1289	104	2		wild_type	ERR2194404		Mastrorilli et al 2020
S. enterica	Napoli	3022-2011_S13		2011	Italy	Italy	Trentino_Alto_Adige_region					Human							SAL_NA7863AA	SAL_YA5992AA_AS	474	60	161	147	96	178	155	12	142	107123	107123	107123	107123	107123	107123	107123	24950	1543	1543	1543b	N2	1289	104	2		wild_type	ERR2194405		Mastrorilli et al 2020
S. enterica	Napoli	3399-2011_S14		2011	Italy	Italy	Trentino_Alto_Adige_region					Human							SAL_NA7861AA	SAL_YA5994AA_AS	474	60	161	147	96	178	155	12	142	107119	107119	107119	107034	107034	107034	107034	107034	1543	1543	1543b	N2	1289	104	2		wild_type	ERR2194407		Mastrorilli et al 2020
S. enterica	Napoli	3530-2011_S15		2011	Italy	Italy	Veneto			ITH3		Food							SAL_NA7860AA	SAL_YA5995AA_AS	2008	60	161	147	348	178	155	436	142	107118	107118	107118	107118	107118	7814	7673	7673	7673	7673	7673	N1	1289	104	2		wild_type	ERR2194408		Mastrorilli et al 2020
S. enterica	Napoli	3868-2011_S16		2011	Italy	Italy	Veneto			ITH3									SAL_NA7859AA	SAL_YA5996AA_AS	1637	60	161	163	96	178	155	12	142	107122	107122	107122	107122	107122	97217	97217	20879	20879	20879	20879	N2	1289	104	2		wild_type	ERR2194409		Mastrorilli et al 2020
S. enterica	Napoli	77-2011_S9		2011	Italy	Italy	Lombardia			ITC4		Animal	Poultry_Laboratory						SAL_NA7858AA	SAL_YA5997AA_AS	474	60	161	147	96	178	155	12	142	107117	107029	107029	107029	107029	107029	107029	24950	1543	1543	1543b	N2	1289	104	2		wild_type	ERR2194410		Mastrorilli et al 2020
S. enterica	Napoli	ISS_07/12/13	Nap7-12-13	2011	Italy		Lazio			ITI4		Animal	Wild_Boar						SAL_ZA6862AA	SAL_SB4190AA_AS	7212	60	161	147	947	178	774	12	142	204982	204982	204982	204982	204982	204982	94666	94666	94666	94666	94666	N2	1289	104	2		wild_type	ERR16071808		This study
S. enterica	Napoli	20120783	S20120783	2012	Spain	Spain	Madrid	Madrid		ES300		Human	Stool	4	11	Female	4	Isolated	SAL_QB4517AA	SAL_ZC4337AA_AS	474	60	161	147	96	178	155	12	142	343817	343816	343816	343816	343816	343813	343813	343813	343813	1543	1543c	N2	1289	104	2		wild_type	ERR16088450		This study
S. enterica	Napoli	20120809	S20120809	2012	Spain	Spain	Madrid	Madrid		ES300		Human	Stool	4	12	Male	9	Isolated	SAL_QB4518AA	SAL_ZC4338AA_AS	474	60	161	147	96	178	155	12	142	343816	343816	343816	343816	343816	343813	343813	343813	343813	1543	1543c	N2	1289	104	2		wild_type	ERR16088451		This study
S. enterica	Napoli	20121924	S20121924	2012	Spain	Spain	Cantabria	Cantabria		ES130		Animal	Bivalve_wild_Raw_clams	7	10			Isolated	SAL_QB5108AA	SAL_ZC5004AA_AS	474	60	161	147	96	178	155	12	142	344463	344463	344463	344463	344463	344463	344463	344463	343813	1543	1543c	N2	1289	104	2		wild_type	ERR16088452		This study
S. enterica	Napoli	20123107	S20123107	2012	Spain	Spain	Castilla y leon	Zamora		ES419		Human	Stool	9	19	Male	0	Isolated	SAL_QB5109AA	SAL_ZC5008AA_AS	474	60	161	147	96	178	155	12	142	344462	344462	344462	344462	344462	343813	343813	343813	343813	1543	1543c	N2	1289	104	2		wild_type	ERR16088454		This study
S. enterica	Napoli	20124547	S20124547	2012	Spain	Spain	Asturias	Asturias		ES120		Human	Stool	9	14	Male	3	Isolated	SAL_QB5112AA	SAL_ZC5067AA_AS	474	60	161	147	96	178	155	12	142	344480	344480	344480	344480	344480	344480	344480	343813	343813	1543	1543c	N2	1289	104	2		wild_type	ERR16088455		This study
S. enterica	Napoli	UZH_N12-0704	NapN12-704	2012	Switzerland	Italy	Genferseeregion	GE	1006	CH01		Human							SAL_ZA6801AA	SAL_SB3349AA_AS	2008	60	161	147	348	178	155	436	142	204903	204903	204903	204903	204903	204903	204903	7673	7673	7673	7673	N1	1289	104	2		wild_type	ERR16062617		This study
S. enterica	Napoli	UZH_N12-1152	NapN12-1152	2012	Switzerland	Switzerland	Nordwestschweiz	NW	4052	CH03		Human	Stool						SAL_ZA6800AA	SAL_SB3348AA_AS	474	60	161	147	96	178	155	12	142	204904	204904	204904	204904	140601	107128	97218	24950	1543	1543	1543b	N2	1289	104	2		wild_type	ERR16062618		This study
S. enterica	Napoli	UZH_N12-1447	NapN12-1447	2012	Switzerland	Switzerland	Tessin	TE	6516	CH07		Human							SAL_ZA6802AA	SAL_SB3350AA_AS	474	60	161	147	96	178	155	12	142	204907	204907	204907	204907	204907	204907	97218	24950	1543	1543	1543b	N2	1289	104	2		wild_type	ERR16062619		This study
S. enterica	Napoli	UZH_N12-1765	NapN12-1765	2012	Switzerland	Switzerland	Tessin	TE	6802	CH07		Human	Stool						SAL_ZA6803AA	SAL_SB3351AA_AS	474	60	161	147	96	178	155	12	142	204905	204905	204905	204905	204905	204905	204905	24950	1543	1543	1543b	N2	1289	104	2		wild_type	ERR16062620		This study
S. enterica	Napoli	UZH_N12-1925	NapN12-1925	2012	Switzerland	Switzerland	Zentralschweiz	ZS	6473	CH06		Human	Stool						SAL_ZA6804AA	SAL_SB3352AA_AS	474	60	161	147	96	178	155	12	142	204906	204906	204906	204906	204906	204906	107035	24950	1543	1543	1543b	N2	1289	104	2		wild_type	ERR16062621		This study
S. enterica	Napoli	UZH_N12-2092	NapN12-2092	2012	Switzerland	Switzerland	Espace Mittelland	EM	4108	CH02		Human	Stool						SAL_ZA6805AA	SAL_SB3353AA_AS	3866	60	714	147	96	178	155	12	142	204912	204912	204912	204912	204912	204912	67874	67874	67874	67874	67874	N1	1289	104	2		wild_type	ERR16062622		This study
S. enterica	Napoli	UZH_N12-2467	NapN12-2467	2012	Switzerland	Switzerland	Tessin	TE	6500	CH07		Food	Meat						SAL_ZA6813AA	SAL_SB3375AA_AS	474	60	161	147	96	178	155	12	142	204916	204916	204916	204916	204916	204905	204905	24950	1543	1543	1543b	N2	1289	104	2		wild_type	ERR16062623		This study
S. enterica	Napoli	12-113333_S13		2012	Italy	Italy	Friuli_Venezia_Giulia_region			ITH4		Animal	Companion_Felis-catus_stool						SAL_NA7988AA	SAL_YA5867AA_AS	474	60	161	147	96	178	155	12	142	107033	107033	107033	107033	107033	107033	24950	24950	1543	1543	1543b	N2	1289	104	2		wild_type	ERR2194280		Mastrorilli et al 2020
S. enterica	Napoli	12-115216_S11		2012	Italy	Italy	Piemonte			ITC1		Animal	Companion_Felis-catus						SAL_NA7987AA	SAL_YA5868AA_AS	474	60	161	147	96	178	155	12	142	107035	107035	107035	107035	107035	107035	107035	24950	1543	1543	1543b	N2	1289	104	2		wild_type	ERR2194281		Mastrorilli et al 2020
S. enterica	Napoli	12-121740_S11		2012	Italy	Italy	Lazio			ITI4		Animal	Companion_Canine_Canis-lupus-familiaris						SAL_NA7981AA	SAL_YA5874AA_AS	1853	60	161	163	338	178	155	12	142	106990	106990	106990	106990	106990	106990	106990	106990	106990	20879	20879	N2	1289	104	2		wild_type	ERR2194287		Mastrorilli et al 2020
S. enterica	Napoli	12-25446_S10		2012	Italy	Italy	Lombardia			ITC4		Animal	Poultry						SAL_NA7980AA	SAL_YA5875AA_AS	474	60	161	147	96	178	155	12	142	106989	106989	106989	106989	106989	24950	24950	24950	1543	1543	1543b	N2	1289	104	2		wild_type	ERR2194288		Mastrorilli et al 2020
S. enterica	Napoli	12-34549_S12		2012	Italy	Italy	Campania			ITF3		Animal	Livestock_Wild						SAL_NA7979AA	SAL_YA5876AA_AS	2095	60	161	147	151	178	155	12	142	106988	106988	106988	106988	106988	3102	1748	1748	1450	1450	1450	N1	1289	104	2		wild_type	ERR2194289		Mastrorilli et al 2020
S. enterica	Napoli	12-68383_S16		2012	Italy	Italy	Friuli_Venezia_Giulia_region			ITH4		Animal	Livestock_Bos_wild_stool						SAL_NA7977AA	SAL_YA5878AA_AS	474	60	161	147	96	178	155	12	142	107033	107033	107033	107033	107033	107033	24950	24950	1543	1543	1543b	N2	1289	104	2		wild_type	ERR2194291		Mastrorilli et al 2020
S. enterica	Napoli	16-174478_S5	16-174478	2012	Italy	Italy	Campania			ITF3		Human	Stool						SAL_NA7962AA	SAL_YA5893AA_AS	2095	60	161	147	151	178	155	12	142	110450	110450	110450	110450	110450	110450	107014	107014	1450	1450	1450	N1	1289	104	2	blaCTX-M-15	wild_type	ERR2194306	CP063140.1	Petrin et al 2020
S. enterica	Napoli	17-111287_S32		2012	Italy	Italy	Lazio			ITI4		Animal	Companion_Canine_Canis-lupus-familiaris						SAL_NA7908AA	SAL_YA5947AA_AS	1853	60	161	163	338	178	155	12	142	106990	106990	106990	106990	106990	106990	106990	106990	106990	20879	20879	N2	1289	104	2		wild_type	ERR2194360		Mastrorilli et al 2020
S. enterica	Napoli	17-111288_S33		2012	Italy	Italy	Lazio			ITI4		Animal	Companion_Canine_Canis-lupus-familiaris						SAL_NA7907AA	SAL_YA5948AA_AS	1853	60	161	163	338	178	155	12	142	106990	106990	106990	106990	106990	106990	106990	106990	106990	20879	20879	N2	1289	104	2		wild_type	ERR2194361		Mastrorilli et al 2020
S. enterica	Napoli	3372-2012_S8		2012	Italy	Italy	Sicilia			ITG1		Animal	Laboratory_Ovis						SAL_NA7862AA	SAL_YA5993AA_AS	4552	60	161	147	348	178	155	12	849	107120	107120	107120	107120	107120	107120	107120	107120	107120	107120	107120	N1	1289	104	2		wild_type	ERR2194406		Mastrorilli et al 2020
S. enterica	Napoli	2015_121544_1	SN2	2012	Italy	Italy	Lombardia	Lecco	23900	ITC4		Human		6	25				SAL_RA8838AA	SAL_DB0844AA_AS	474	60	161	147	96	178	155	12	142	137318	137318	137318	137318	137318	137318	97218	24950	1543	1543	1543b	N2	1289	104	2		wild_type	ERR2588158		Gori et al 2018
S. enterica	Napoli	2016_13358_15	SN1	2012	Italy	Italy	Lombardia	Pavia	27100	ITC4		Human		5	11				SAL_RA9164AA	SAL_DB0895AA_AS	474	60	161	147	96	178	155	12	142	137353	137353	137353	137353	137353	137353	137334	24950	1543	1543	1543b	N2	1289	104	2		wild_type	ERR2588180		Gori et al 2018
S. enterica	Napoli	2016_13358_18	SN3	2012	Italy	Italy	Lombardia	Pavia	27100	ITC4		Human		6	27				SAL_RA9163AA	SAL_DB0896AA_AS	474	60	161	147	96	178	155	12	142	137337	137337	137337	137337	137337	137337	24950	24950	1543	1543	1543b	N2	1289	104	2		wild_type	ERR2588181		Gori et al 2018
S. enterica	Napoli	2016_13358_7	SN4	2012	Italy	Italy	Lombardia	Brescia Antica	25121	ITC4		Human		6	28				SAL_RA9167AA	SAL_DB0892AA_AS	474	60	161	147	96	178	155	12	142	137338	137338	137338	137338	137338	107028	26263	24950	1543	1543	1543b	N2	1289	104	2		wild_type	ERR2588177		Gori et al 2018
S. enterica	Napoli	2016_13358_8	SN5	2012	Italy	Italy	Lombardia	Brescia Antica	25121	ITC4		Human		8	26				SAL_RA9166AA	SAL_DB0893AA_AS	4548	60	161	710	96	178	155	12	142	137342	107044	107044	107044	107044	107044	24950	24950	1543	1543	1543b	N2	1289	104	2		wild_type	ERR2588178		Gori et al 2018
S. enterica	Napoli	ISS_02/04/13	Nap2-4-13	2012	Italy	Italy	Piemonte			ITC1		Human	Stool						SAL_ZA7001AA	SAL_SB4343AA_AS	474	60	161	147	96	178	155	12	142	205106	205106	205106	205106	205106	205040	97218	24950	1543	1543	1543b	N2	1289	104	2		wild_type	ERR16071742		This study
S. enterica	Napoli	ISS_02/05/13	Nap2-5-13	2012	Italy	Italy	Piemonte			ITC1		Human	Stool						SAL_ZA7003AA	SAL_SB4345AA_AS	474	60	161	147	96	178	155	12	142	205103	205103	205103	205103	204891	107028	26263	24950	1543	1543	1543b	N2	1289	104	2		wild_type	ERR16071743		This study
S. enterica	Napoli	ISS_10/03/13	Nap10-3-13	2012	Italy	Italy	Piemonte			ITC1		Human	Stool						SAL_ZA6864AA	SAL_SB4192AA_AS	474	60	161	147	96	178	155	12	142	204986	204986	204986	204986	204986	204907	97218	24950	1543	1543	1543b	N2	1289	104	2		wild_type	ERR16071712		This study
S. enterica	Napoli	ISS_20/04/13	Nap20-4-13	2012	Italy	Italy	Piemonte			ITC1		Food							SAL_ZA6880AA	SAL_SB4208AA_AS	474	60	161	147	96	178	155	12	142	204987	204987	204987	204987	204987	204911	107035	24950	1543	1543	1543b	N2	1289	104	2		wild_type	ERR16071741		This study
S. enterica	Napoli	ISS_30/08/13	Nap30-8-13	2012	Italy	Italy	Piemonte			ITC1		Human	Stool						SAL_ZA6878AA	SAL_SB4206AA_AS	474	60	161	147	96	178	155	12	142	204973	204973	204973	204973	204973	107089	97218	24950	1543	1543	1543b	N2	1289	104	2	blaTEM-1,sul2,dfrA1	wild_type	ERR16071746		This study
S. enterica	Napoli	ISS_30/10/13	Nap30-10-13	2012	Italy	Italy	Piemonte			ITC1		Human	Stool						SAL_ZA6883AA	SAL_SB4211AA_AS	2095	60	161	147	151	178	155	12	142	204983	204983	204983	204983	204983	204983	204983	204983	1450	1450	1450	N1	1289	104	2		wild_type	ERR16071744		This study
S. enterica	Napoli	ISS_87/6/12	Nap87-6-12	2012	Italy	Italy	Piemonte			ITC1		Human	Stool						SAL_ZA6966AA	SAL_SB4308AA_AS	474	60	161	147	96	178	155	12	142	205069	205069	205069	205069	205068	24950	24950	24950	1543	1543	1543b	N2	1289	104	2		wild_type	ERR16071836		This study
S. enterica	Napoli	ISS_87/7/12	Nap87-7-12	2012	Italy	Italy	Piemonte			ITC1		Human	Stool						SAL_ZA6965AA	SAL_SB4307AA_AS	474	60	161	147	96	178	155	12	142	205068	205068	205068	205068	205068	24950	24950	24950	1543	1543	1543b	N2	1289	104	2		wild_type	ERR16071837		This study
S. enterica	Napoli	ISS_87/8/12	Nap87-8-12	2012	Italy	Italy	Piemonte			ITC1		Human	Stool						SAL_ZA6968AA	SAL_SB4310AA_AS	474	60	161	147	96	178	155	12	142	205070	205070	205070	205070	205070	24950	24950	24950	1543	1543	1543b	N2	1289	104	2		wild_type	ERR16071839		This study
S. enterica	Napoli	ISS_87/9/12	Nap87-9-12	2012	Italy	Italy	Piemonte			ITC1		Human	Stool						SAL_ZA6969AA	SAL_SB4311AA_AS	474	60	161	147	96	178	155	12	142	205073	205073	205073	205073	205073	205073	107035	24950	1543	1543	1543b	N2	1289	104	2		wild_type	ERR16071840		This study
S. enterica	Napoli	20132933	S20132933	2013	Spain	Spain	Castilla la Mancha	Albacete		ES421		Human	Stool	9	13	Female	1	Isolated	SAL_QB5110AA	SAL_ZC5006AA_AS	474	60	161	147	96	178	155	12	142	344466	344466	344466	344466	344466	343813	343813	343813	343813	1543	1543c	N2	1289	104	2		wild_type	ERR16088453		This study
S. enterica	Napoli	20133716	S20133716	2013	Spain	Spain	Asturias	Asturias		ES120		Human	Stool	9	4	Female	5	Isolated	SAL_QB5113AA	SAL_ZC5010AA_AS	10098	60	161	147	96	1849	155	12	142	344474	344474	344474	344474	344474	343813	343813	343813	343813	1543	1543c	N2	1289	104	2		wild_type	ERR16088456		This study
S. enterica	Napoli	20133718	S20133718	2013	Spain	Italy	Asturias	Asturias		ES120		Human	Stool	8	28	Female	12	Isolated	SAL_QB5606AA	SAL_ZC5497AA_AS	1853	60	161	163	338	178	155	12	142	344885	344885	344885	344885	344885	205062	205062	205058	106990	20879	20879	N2	1289	104	2		wild_type	ERR16088457		This study
S. enterica	Napoli	20133737	S20133737	2013	Spain	Spain	Asturias	Asturias		ES120		Animal	Bivalve_wild_Razor_clams	8	27			Isolated	SAL_QB5111AA	SAL_ZC5007AA_AS	474	60	161	147	96	178	155	12	142	344464	344464	344462	344462	344462	343813	343813	343813	343813	1543	1543c	N2	1289	104	2		wild_type	ERR16088458		This study
S. enterica	Napoli	20133752	S20133752	2013	Spain	Spain	Asturias	Asturias		ES120		Animal	Bivalve_wild_Raw_clams	7	30			Isolated	SAL_QB5168AA	SAL_ZC5065AA_AS	474	60	161	147	96	178	155	12	142	344509	344509	344509	344509	344509	343813	343813	343813	343813	1543	1543c	N2	1289	104	2		wild_type	ERR16088459		This study
S. enterica	Napoli	UZH_N13-0395	NapN13-0395	2013	Switzerland	Switzerland	Zürich	ZH	8707	CH04		Human	Stool						SAL_ZA6807AA	SAL_SB3355AA_AS	474	60	161	147	96	178	155	12	142	204909	204909	204909	204899	140601	107128	97218	24950	1543	1543	1543b	N2	1289	104	2		wild_type	ERR16062624		This study
S. enterica	Napoli	UZH_N13-0609	NapN13-0609	2013	Switzerland	Italy	Espace Mittelland	EM	3432	CH02		Human							SAL_ZA6808AA	SAL_SB3356AA_AS	2019	60	161	147	348	178	155	12	142	204908	204908	204908	129449	129449	129449	20426	20426	7673	7673	7673	N1	1289	104	2		wild_type	ERR16062625		This study
S. enterica	Napoli	UZH_N13-0865	NapN13-0865	2013	Switzerland	Switzerland	Nordwestschweiz	NW	4441	CH03		Human	Stool						SAL_ZA6809AA	SAL_SB3357AA_AS	474	60	161	147	96	178	155	12	142	204910	204910	204910	204910	204871	204871	107093	24950	1543	1543	1543b	N2	1289	104	2		wild_type	ERR16062626		This study
S. enterica	Napoli	UZH_N13-1108	NapN13-1108	2013	Switzerland	Switzerland	Genferseeregion	GE	1950	CH01		Human	Stool						SAL_ZA6810AA	SAL_SB3358AA_AS	474	60	161	147	96	178	155	12	142	204911	204911	204911	204911	204911	204911	107035	24950	1543	1543	1543b	N2	1289	104	2		wild_type	ERR16062627		This study
S. enterica	Napoli	UZH_N13-1242	NapN13-1242	2013	Switzerland	Switzerland	Tessin	TE	6593	CH07		Human	Stool						SAL_ZA6811AA	SAL_SB3373AA_AS	474	60	161	147	96	178	155	12	142	204913	204913	204913	204913	204913	24950	24950	24950	1543	1543	1543b	N2	1289	104	2		wild_type	ERR16062628		This study
S. enterica	Napoli	UZH_N13-1504	NapN13-1504	2013	Switzerland		Zürich	ZH	8610	CH04		Human	Stool						SAL_ZA6812AA	SAL_SB3374AA_AS	7172	60	161	147	945	178	155	12	142	204914	204914	204914	204914	204914	204914	204914	204914	204914	67874	67874	N1	1289	104	2		wild_type	ERR16062629		This study
S. enterica	Napoli	UZH_N13-1858	NapN13-1858	2013	Switzerland	Switzerland	Tessin	TE	6988	CH07		Human	Stool						SAL_ZA6814AA	SAL_SB3376AA_AS	474	60	161	147	96	178	155	12	142	204915	204915	204915	204915	204915	24950	24950	24950	1543	1543	1543b	N2	1289	104	2		wild_type	ERR16062630		This study
S. enterica	Napoli	13-125482_S9		2013	Italy	Italy	Trentino_Alto_Adige_region					Human							SAL_NA7976AA	SAL_YA5879AA_AS	474	60	161	147	96	178	155	12	142	107032	107032	107032	107032	107032	107032	101591	24950	1543	1543	1543b	N2	1289	104	2		wild_type	ERR2194292		Mastrorilli et al 2020
S. enterica	Napoli	2013_183189_3	SN7	2013	Italy	Italy	Lombardia	Lecco	23900	ITC4		Human		7	1				SAL_RA8848AA	SAL_DB0834AA_AS	474	60	161	147	96	178	155	12	142	137320	137320	137320	137320	137320	137320	24950	24950	1543	1543	1543b	N2	1289	104	2		wild_type	ERR2588148		Gori et al 2018
S. enterica	Napoli	2013_205268_4	SN14	2013	Italy	Italy	Emilia-Romagna	Cesena	47521	ITH5		Human		7	29				SAL_RA9154AA	SAL_DB0905AA_AS	474	60	161	147	96	178	155	12	142	137333	137333	137333	137333	137333	137333	106993	24950	1543	1543	1543b	N2	1289	104	2		wild_type	ERR2588190		Gori et al 2018
S. enterica	Napoli	2013_222309_5	SN16	2013	Italy	Italy	Emilia-Romagna	Piacenza	29121	ITH5		Human		8	12				SAL_RA8847AA	SAL_DB0835AA_AS	474	60	161	147	96	178	155	12	142	137324	137324	137324	137324	137324	24950	24950	24950	1543	1543	1543b	N2	1289	104	2		wild_type	ERR2588149		Gori et al 2018
S. enterica	Napoli	2013_232892_2	SN20	2013	Italy	Italy	Emilia-Romagna	Reggio Emilia	42121	ITH5		Human		9					SAL_RA8846AA	SAL_DB0836AA_AS	474	60	161	147	96	178	155	12	142	137323	137323	137323	137323	137323	137323	107029	24950	1543	1543	1543b	N2	1289	104	2	blaTEM-1	wild_type	ERR2588150		Gori et al 2018
S. enterica	Napoli	2013_251581_19	SN22	2013	Italy	Italy	Emilia-Romagna	Piacenza	29121	ITH5		Human		9	17				SAL_RA8845AA	SAL_DB0837AA_AS	474	60	161	147	96	178	155	12	142	137321	137321	137321	137321	137321	137321	24950	24950	1543	1543	1543b	N2	1289	104	2	blaTEM-1	wild_type	ERR2588151		Gori et al 2018
S. enterica	Napoli	2013_273297	SN25	2013	Italy	Italy	Emilia-Romagna	Bologne	40121	ITH5		Human		10	28				SAL_RA8844AA	SAL_DB0838AA_AS	474	60	161	147	96	178	155	12	142	137322	137322	137322	137322	137322	137322	24950	24950	1543	1543	1543b	N2	1289	104	2		wild_type	ERR2588152		Gori et al 2018
S. enterica	Napoli	2014_19266_3	SN26	2013	Italy	Italy	Emilia-Romagna	Ferrare	42121	ITH5		Human		12	5				SAL_RA8843AA	SAL_DB0839AA_AS	474	60	161	147	96	178	155	12	142	137326	137326	137326	137326	137326	137326	137326	24950	1543	1543	1543b	N2	1289	104	2		wild_type	ERR2588153		Gori et al 2018
S. enterica	Napoli	2015_121544_3	SN11	2013	Italy	Italy	Lombardia	Milano	20122	ITC4		Human		7	16				SAL_RA8837AA	SAL_DB0845AA_AS	474	60	161	147	96	178	155	12	142	137317	137317	137317	137317	137317	24950	24950	24950	1543	1543	1543b	N2	1289	104	2		wild_type	ERR2588159		Gori et al 2018
S. enterica	Napoli	2015_121544_5	SN8	2013	Italy	Italy	Lombardia	Como	22100	ITC4		Human		7	9				SAL_RA8836AA	SAL_DB0846AA_AS	474	60	161	147	96	178	155	12	142	137319	137319	137319	137319	137319	137319	97218	24950	1543	1543	1543b	N2	1289	104	2		wild_type	ERR2588160		Gori et al 2018
S. enterica	Napoli	2015_121559_10	SN21	2013	Italy	Italy	Lombardia	Varese	21100	ITC4		Human		9	9				SAL_RA8834AA	SAL_DB0848AA_AS	474	60	161	147	96	178	155	12	142	137316	137316	137316	137316	137316	107128	97218	24950	1543	1543	1543b	N2	1289	104	2		wild_type	ERR2588162		Gori et al 2018
S. enterica	Napoli	2015_121559_5	SN18	2013	Italy	Italy	Lombardia	Como	22100	ITC4		Human		8	19				SAL_RA8833AA	SAL_DB0849AA_AS	474	60	161	147	96	178	155	12	142	137329	137329	137329	137329	137329	137329	97218	24950	1543	1543	1543b	N2	1289	104	2		wild_type	ERR2588163		Gori et al 2018
S. enterica	Napoli	2015_121559_6	SN13	2013	Italy	Italy	Lombardia	Como	22100	ITC4		Human		7	23				SAL_RA8832AA	SAL_DB0850AA_AS	474	60	161	147	96	178	155	12	142	137331	137331	137331	137331	137331	137331	97218	24950	1543	1543	1543b	N2	1289	104	2		wild_type	ERR2588164		Gori et al 2018
S. enterica	Napoli	2015_121559_7	SN15	2013	Italy	Italy	Lombardia	Como	22100	ITC4		Human		7	31				SAL_RA8831AA	SAL_DB0851AA_AS	474	60	161	147	96	178	155	12	142	137335	137335	137335	137335	137335	107128	97218	24950	1543	1543	1543b	N2	1289	104	2		wild_type	ERR2588165		Gori et al 2018
S. enterica	Napoli	2015_121559_8	SN17	2013	Italy	Italy	Lombardia	Varese	21100	ITC4		Human		8	16				SAL_RA9177AA	SAL_DB0882AA_AS	474	60	161	147	96	178	155	12	142	137347	137347	137347	137347	137347	137347	97218	24950	1543	1543	1543b	N2	1289	104	2		wild_type	ERR2588166		Gori et al 2018
S. enterica	Napoli	2015_121559_9	SN19	2013	Italy	Italy	Lombardia	Varese	21100	ITC4		Human		9	8				SAL_RA9176AA	SAL_DB0883AA_AS	474	60	161	147	96	178	155	12	142	137340	137340	137340	137340	137340	137340	97218	24950	1543	1543	1543b	N2	1289	104	2		wild_type	ERR2588167		Gori et al 2018
S. enterica	Napoli	2015_126665_1	SN6	2013	Italy	Italy	Lombardia	Lecco	23900	ITC4		Human		5	24				SAL_RA9172AA	SAL_DB0887AA_AS	474	60	161	147	96	178	155	12	142	137345	137345	137345	137345	137345	107128	97218	24950	1543	1543	1543b	N2	1289	104	2		wild_type	ERR2588172		Gori et al 2018
S. enterica	Napoli	2015_126665_2	SN9	2013	Italy	Italy	Lombardia	Merate	23900	ITC4		Human		7	11				SAL_RA9171AA	SAL_DB0888AA_AS	474	60	161	147	96	178	155	12	142	137348	137348	137348	137348	137348	24950	24950	24950	1543	1543	1543b	N2	1289	104	2		wild_type	ERR2588173		Gori et al 2018
S. enterica	Napoli	2015_126665_3	SN23	2013	Italy	Italy	Lombardia	Lecco	23900	ITC4		Human		9	25				SAL_RA9170AA	SAL_DB0889AA_AS	474	60	161	147	96	178	155	12	142	137349	137349	137349	137349	137349	137349	107042	24950	1543	1543	1543b	N2	1289	104	2		wild_type	ERR2588174		Gori et al 2018
S. enterica	Napoli	2016_13358_10	SN10	2013	Italy	Italy	Lombardia	Sondrio	23100	ITC4		Human		7	14				SAL_RA9165AA	SAL_DB0894AA_AS	474	60	161	147	96	178	155	12	142	137346	137346	137346	137346	137346	107128	97218	24950	1543	1543	1543b	N2	1289	104	2		wild_type	ERR2588179		Gori et al 2018
S. enterica	Napoli	2016_13358_11	SN12	2013	Italy	Italy	Lombardia	Sondrio	23100	ITC4		Human		7	20				SAL_RA9153AA	SAL_DB0906AA_AS	5141	60	161	147	96	178	155	815	142	137355	137355	137355	137355	137355	137355	107093	24950	1543	1543	1543b	N2	1289	104	2		wild_type	ERR2588191		Gori et al 2018
S. enterica	Napoli	ISS_40/6/14	Nap40-6-14	2013	Italy	Italy	Lazio			ITI4		Human	Stool						SAL_ZA6884AA	SAL_SB4212AA_AS	474	60	161	147	96	178	155	12	142	204984	204984	204984	204984	204984	204984	204984	204984	1543	1543	1543b	N2	1289	104	2		wild_type	ERR16071752		This study
S. enterica	Napoli	ISS_49/29/13	Nap49-29-13	2013	Italy	Italy	Campania			ITF3		Environment	Water-surface						SAL_ZA6893AA	SAL_SB4221AA_AS	2019	60	161	147	348	178	155	12	142	204993	107104	107104	107104	107104	107104	20426	20426	7673	7673	7673	N1	1289	104	2		wild_type	ERR16071758		This study
S. enterica	Napoli	ISS_49/30/13	Nap49-30-13	2013	Italy	Italy	Campania			ITF3		Environment	Water-surface						SAL_ZA6894AA	SAL_SB4222AA_AS	2008	60	161	147	348	178	155	436	142	204997	107073	107073	107073	107073	7814	7673	7673	7673	7673	7673	N1	1289	104	2		wild_type	ERR16071759		This study
S. enterica	Napoli	ISS_49/31/13	Nap49-31-13	2013	Italy	Italy	Campania			ITF3		Environment	Water-surface						SAL_ZA6895AA	SAL_SB4223AA_AS	2008	60	161	147	348	178	155	436	142	204998	204998	107106	107106	107106	107106	7673	7673	7673	7673	7673	N1	1289	104	2		wild_type	ERR16071760		This study
S. enterica	Napoli	ISS_49/32/13	Nap49-32-13	2013	Italy	Italy	Campania			ITF3		Environment	Water-surface						SAL_ZA6897AA	SAL_SB4225AA_AS	2008	60	161	147	348	178	155	436	142	204999	107020	107020	107020	107020	7814	7673	7673	7673	7673	7673	N1	1289	104	2		wild_type	ERR16071761		This study
S. enterica	Napoli	ISS_49/33/13	Nap49-33-13	2013	Italy	Italy	Campania			ITF3		Environment	Water-surface						SAL_ZA6896AA	SAL_SB4224AA_AS	2019	60	161	147	348	178	155	12	142	205000	107072	107072	107072	107072	20425	20425	7673	7673	7673	7673	N1	1289	104	2		wild_type	ERR16071762		This study
S. enterica	Napoli	ISS_49/34/13	Nap49-34-13	2013	Italy	Italy	Campania			ITF3		Environment	Water-surface						SAL_ZA6898AA	SAL_SB4226AA_AS	2008	60	161	147	348	178	155	436	142	205003	205003	107071	107071	107071	20408	7673	7673	7673	7673	7673	N1	1289	104	2		wild_type	ERR16071763		This study
S. enterica	Napoli	ISS_49/35/13	Nap49-35-13	2013	Italy	Italy	Campania			ITF3		Environment	Water-surface						SAL_ZA6900AA	SAL_SB4228AA_AS	2019	60	161	147	348	178	155	12	142	205006	107022	107022	107022	107022	20426	20426	20426	7673	7673	7673	N1	1289	104	2		wild_type	ERR16071764		This study
S. enterica	Napoli	ISS_49/36/13	Nap49-36-13	2013	Italy	Italy	Campania			ITF3		Environment	Water-surface						SAL_ZA6899AA	SAL_SB4227AA_AS	2008	60	161	147	348	178	155	436	142	205005	205005	107070	107070	20403	20403	20403	7673	7673	7673	7673	N1	1289	104	2		wild_type	ERR16071765		This study
S. enterica	Napoli	ISS_54/2/13	Nap54-2-13	2013	Italy	Italy	Piemonte			ITC1		Human	Stool						SAL_ZA6908AA	SAL_SB4250AA_AS	474	60	161	147	96	178	155	12	142	205011	205011	205011	205011	205011	205011	107035	24950	1543	1543	1543b	N2	1289	104	2		wild_type	ERR16071776		This study
S. enterica	Napoli	ISS_54/3/13	Nap54-3-13	2013	Italy	Italy	Piemonte			ITC1		Human	Stool						SAL_ZA6909AA	SAL_SB4251AA_AS	474	60	161	147	96	178	155	12	142	205012	205012	205012	205012	205012	205012	26263	24950	1543	1543	1543b	N2	1289	104	2		wild_type	ERR16071777		This study
S. enterica	Napoli	ISS_59/1/13	Nap59-1-13	2013	Italy	Italy	Piemonte			ITC1		Human	Stool						SAL_ZA6914AA	SAL_SB4256AA_AS	7210	60	161	147	946	178	155	12	142	205022	205022	205022	205022	205022	205022	204969	107057	107057	7673	7673	N1	1289	104	2		wild_type	ERR16071782		This study
S. enterica	Napoli	ISS_63/2/13	Nap63-2-13	2013	Italy	Italy	Piemonte			ITC1		Human	Stool						SAL_ZA6920AA	SAL_SB4262AA_AS	474	60	161	147	96	178	155	12	142	205021	205021	205021	205021	205021	205021	97218	24950	1543	1543	1543b	N2	1289	104	2		wild_type	ERR16071788		This study
S. enterica	Napoli	ISS_63/3/13	Nap63-3-13	2013	Italy	Italy	Piemonte			ITC1		Human	Stool						SAL_ZA6922AA	SAL_SB4264AA_AS	474	60	161	147	96	178	155	12	142	205025	205025	205025	205025	205025	24950	24950	24950	1543	1543	1543b	N2	1289	104	2		wild_type	ERR16071791		This study
S. enterica	Napoli	ISS_68/1/13	Nap68-1-13	2013	Italy	Italy	Piemonte			ITC1		Human	Stool						SAL_ZA6935AA	SAL_SB4277AA_AS	474	60	161	147	96	178	155	12	142	205039	205039	205039	205039	205039	24950	24950	24950	1543	1543	1543b	N2	1289	104	2		wild_type	ERR16071803		This study
S. enterica	Napoli	ISS_68/2/13	Nap68-2-13	2013	Italy	Italy	Piemonte			ITC1		Human	Stool						SAL_ZA6937AA	SAL_SB4279AA_AS	474	60	161	147	96	178	155	12	142	205040	205040	205040	205040	205040	205040	97218	24950	1543	1543	1543b	N2	1289	104	2		wild_type	ERR16071804		This study
S. enterica	Napoli	ISS_68/4/13	Nap68-4-13	2013	Italy	Italy	Piemonte			ITC1		Human	Stool						SAL_ZA6936AA	SAL_SB4278AA_AS	474	60	161	147	96	178	155	12	142	205036	205036	205036	205036	205036	107089	97218	24950	1543	1543	1543b	N2	1289	104	2		wild_type	ERR16071807		This study
S. enterica	Napoli	ISS_81/2/13	Nap81-2-13	2013	Italy	Italy	Piemonte			ITC1		Human	Stool						SAL_ZA6950AA	SAL_SB4292AA_AS	474	60	161	147	96	178	155	12	142	205052	205052	205052	205052	205052	107044	24950	24950	1543	1543	1543b	N2	1289	104	2		wild_type	ERR16071820		This study
S. enterica	Napoli	ISS_81/8/13	Nap81-8-13	2013	Italy	Italy	Piemonte			ITC1		Human	Stool						SAL_ZA6952AA	SAL_SB4294AA_AS	7214	60	161	147	96	1424	155	12	142	205057	205057	205057	205057	205057	205057	107035	24950	1543	1543	1543b	N2	1289	104	2		wild_type	ERR16071822		This study
S. enterica	Napoli	ISS_82/4/13	Nap82-4-13	2013	Italy	Italy	Piemonte			ITC1		Human	Stool						SAL_ZA6953AA	SAL_SB4295AA_AS	474	60	161	147	96	178	155	12	142	205054	205054	205054	205054	205054	107076	107035	24950	1543	1543	1543b	N2	1289	104	2	aadA1,aadA2,sul3,dfrA12,cmlA1	wild_type	ERR16071824		This study
S. enterica	Napoli	UZH_N14-0765	NapN14-765	2014	Switzerland	Switzerland	Zentralschweiz	ZS	6472	CH06		Human	Stool						SAL_ZA6815AA	SAL_SB3377AA_AS	474	60	161	147	96	178	155	12	142	204917	204917	204917	204917	204917	204917	97218	24950	1543	1543	1543b	N2	1289	104	2		wild_type	ERR16062631		This study
S. enterica	Napoli	UZH_N14-1001	NapN14-1001	2014	Switzerland	Switzerland	Tessin	TE	6835	CH07		Human	Stool						SAL_ZA6816AA	SAL_SB3378AA_AS	474	60	161	147	96	178	155	12	142	204919	204919	204919	204919	204919	107128	97218	24950	1543	1543	1543b	N2	1289	104	2		wild_type	ERR16062632		This study
S. enterica	Napoli	UZH_N14-1424	NapN14-1424	2014	Switzerland	Switzerland	Zürich	ZH	8805	CH04		Human	Blood						SAL_ZA6817AA	SAL_SB3379AA_AS	474	60	161	147	96	178	155	12	142	204918	204918	204918	204918	204918	204907	97218	24950	1543	1543	1543b	N2	1289	104	2		wild_type	ERR16062633		This study
S. enterica	Napoli	UZH_N14-1907	NapN14-1907	2014	Switzerland	Switzerland	Nordwestschweiz	NW	5430	CH03		Human	Stool						SAL_ZA6819AA	SAL_SB3395AA_AS	474	60	161	147	96	178	155	12	142	204920	204920	204920	204899	140601	107128	97218	24950	1543	1543	1543b	N2	1289	104	2		wild_type	ERR16062634		This study
S. enterica	Napoli	UZH_N14-2000	NapN14-2000	2014	Switzerland	Switzerland	Tessin	TE	6613	CH07		Human	Stool						SAL_ZA6818AA	SAL_SB3380AA_AS	474	60	161	147	96	178	155	12	142	204921	204921	204921	204921	204907	204907	97218	24950	1543	1543	1543b	N2	1289	104	2		wild_type	ERR16062635		This study
S. enterica	Napoli	UZH_N14-2320	NapN14-2320	2014	Switzerland	Switzerland	Tessin	TE	6622	CH07		Human	Stool						SAL_ZA6820AA	SAL_SB3396AA_AS	474	60	161	147	96	178	155	12	142	204922	204922	204922	204921	204907	204907	97218	24950	1543	1543	1543b	N2	1289	104	2		wild_type	ERR16062636		This study
S. enterica	Napoli	104-2014_S26		2014	Italy	Italy	Piemonte			ITC1		Animal	Livestock_Sus-scrofa						SAL_NA7990AA	SAL_YA5865AA_AS	474	60	161	147	96	178	155	12	142	106992	106992	106992	106992	106992	106992	106992	106992	1543	1543	1543b	N2	1289	104	2		wild_type	ERR2194278		Mastrorilli et al 2020
S. enterica	Napoli	14-104682_S19		2014	Italy	Italy	Trentino_Alto_Adige_region					Human							SAL_NA7975AA	SAL_YA5880AA_AS	474	60	161	147	96	178	155	12	142	107034	107034	107034	107034	107034	107034	107034	107034	1543	1543	1543b	N2	1289	104	2		wild_type	ERR2194293		Mastrorilli et al 2020
S. enterica	Napoli	14-25364_S18		2014	Italy	Italy	Piemonte			ITC1		Animal	Livestock_Sus-scrofa						SAL_NA7974AA	SAL_YA5881AA_AS	474	60	161	147	96	178	155	12	142	107030	107030	107030	107030	107030	107028	26263	24950	1543	1543	1543b	N2	1289	104	2		wild_type	ERR2194294		Mastrorilli et al 2020
S. enterica	Napoli	14-5967_S17		2014	Italy	Italy	Lombardia			ITC4		Animal	Poultry						SAL_NA7973AA	SAL_YA5882AA_AS	474	60	161	147	96	178	155	12	142	107029	107029	107029	107029	107029	107029	107029	24950	1543	1543	1543b	N2	1289	104	2		wild_type	ERR2194295		Mastrorilli et al 2020
S. enterica	Napoli	146-2014_S27		2014	Italy	Italy	Veneto			ITH3		Human							SAL_NA7972AA	SAL_YA5883AA_AS	474	60	161	147	96	178	155	12	142	107028	107028	107028	107028	107028	107028	26263	24950	1543	1543	1543b	N2	1289	104	2		wild_type	ERR2194296		Mastrorilli et al 2020
S. enterica	Napoli	17-33384_S12		2014	Italy	Italy	unknown					Human							SAL_NA7880AA	SAL_YA5975AA_AS	2095	60	161	147	151	178	155	12	142	107087	107087	107087	107087	107087	107046	1748	1748	1450	1450	1450	N1	1289	104	2		wild_type	ERR2194388		Mastrorilli et al 2020
S. enterica	Napoli	2014_176014	SN30	2014	Italy	Italy	Emilia-Romagna	Reggio Emilia	42121	ITH5		Human		7	2				SAL_RA8842AA	SAL_DB0840AA_AS	4549	60	161	147	96	178	155	12	847	137327	137327	137327	137327	137327	137327	107082	24950	1543	1543	1543b	N2	1289	104	2		wild_type	ERR2588154		Gori et al 2018
S. enterica	Napoli	2014_181369_2	SN29	2014	Italy	Italy	Emilia-Romagna	Piacenza	29121	ITH5		Human		6	24				SAL_RA8841AA	SAL_DB0841AA_AS	474	60	161	147	96	178	155	12	142	137325	137325	137325	137325	137325	107044	24950	24950	1543	1543	1543b	N2	1289	104	2		wild_type	ERR2588155		Gori et al 2018
S. enterica	Napoli	2014_212221_8	SN31	2014	Italy	Italy	Emilia-Romagna	Bologne	40121	ITH5		Human		7	29				SAL_RA8840AA	SAL_DB0842AA_AS	474	60	161	147	96	178	155	12	142	137328	137328	137328	137328	137328	107128	97218	24950	1543	1543	1543b	N2	1289	104	2		wild_type	ERR2588156		Gori et al 2018
S. enterica	Napoli	2014_249413_1	SN33	2014	Italy	Italy	Emilia-Romagna	Piacenza	29121	ITH5		Human		9	15				SAL_RA8839AA	SAL_DB0843AA_AS	474	60	161	147	96	178	155	12	142	137334	137334	137334	137334	137334	137334	137334	24950	1543	1543	1543b	N2	1289	104	2		wild_type	ERR2588157		Gori et al 2018
S. enterica	Napoli	2015_121544_6	SN37	2014	Italy	Italy	Lombardia	Milano	20122	ITC4		Human		11	2				SAL_RA8835AA	SAL_DB0847AA_AS	474	60	161	147	96	178	155	12	142	137330	137330	137330	137330	137330	107128	97218	24950	1543	1543	1543b	N2	1289	104	2		wild_type	ERR2588161		Gori et al 2018
S. enterica	Napoli	2015_121559_11	SN27	2014	Italy	Italy	Lombardia	Varese	21100	ITC4		Human		4	8				SAL_RA9175AA	SAL_DB0884AA_AS	474	60	161	147	96	178	155	12	142	137344	137344	137344	137344	137344	107128	97218	24950	1543	1543	1543b	N2	1289	104	2		wild_type	ERR2588169		Gori et al 2018
S. enterica	Napoli	2015_121559_12	SN34	2014	Italy	Italy	Lombardia	Varese	21100	ITC4		Human		9	19				SAL_RA9174AA	SAL_DB0885AA_AS	474	60	161	147	96	178	155	12	142	137343	137343	137343	137343	137343	137343	97218	24950	1543	1543	1543b	N2	1289	104	2		wild_type	ERR2588170		Gori et al 2018
S. enterica	Napoli	2015_121559_13	SN36	2014	Italy	Italy	Lombardia	Varese	21100	ITC4		Human		10	22				SAL_RA9173AA	SAL_DB0886AA_AS	474	60	161	147	96	178	155	12	142	137341	137341	137341	137341	137341	137341	97218	24950	1543	1543	1543b	N2	1289	104	2		wild_type	ERR2588171		Gori et al 2018
S. enterica	Napoli	2015_126665_4	SN28	2014	Italy	Italy	Lombardia	Lecco	23900	ITC4		Human		6	23				SAL_RA9169AA	SAL_DB0890AA_AS	474	60	161	147	96	178	155	12	142	137350	137350	137350	137350	137345	107128	97218	24950	1543	1543	1543b	N2	1289	104	2		wild_type	ERR2588175		Gori et al 2018
S. enterica	Napoli	2015_126665_6	SN35	2014	Italy	Italy	Lombardia	Lecco	23900	ITC4		Human		10	9				SAL_RA9168AA	SAL_DB0891AA_AS	474	60	161	147	96	178	155	12	142	137352	137352	137352	137352	137352	24950	24950	24950	1543	1543	1543b	N2	1289	104	2		wild_type	ERR2588176		Gori et al 2018
S. enterica	Napoli	2016_181312_10	SN39	2014	Italy	Italy	Lombardia	Lodi	26900	ITC4		Human		8	18				SAL_RA9156AA	SAL_DB0903AA_AS	474	60	161	147	96	178	155	12	142	137358	137358	137358	137358	137358	24950	24950	24950	1543	1543	1543b	N2	1289	104	2		wild_type	ERR2588188		Gori et al 2018
S. enterica	Napoli	2016_181312_13	SN43	2014	Italy	Italy	Lombardia	Milano	20122	ITC4		Human		9	29				SAL_RA9155AA	SAL_DB0904AA_AS	474	60	161	147	96	178	155	12	142	137357	137357	137357	137357	106989	24950	24950	24950	1543	1543	1543b	N2	1289	104	2		wild_type	ERR2588189		Gori et al 2018
S. enterica	Napoli	2016_181312_2	SN42	2014	Italy	Italy	Lombardia	Monza	20900	ITC4		Human		5	29				SAL_RA9162AA	SAL_DB0897AA_AS	474	60	161	147	96	178	155	12	142	137336	137336	137336	137336	137336	137336	97218	24950	1543	1543	1543b	N2	1289	104	2		wild_type	ERR2588182		Gori et al 2018
S. enterica	Napoli	2016_181312_4	SN41	2014	Italy	Italy	Lombardia	Milano	20122	ITC4		Human		6	27				SAL_RA9161AA	SAL_DB0898AA_AS	474	60	161	147	96	178	155	12	142	139005	139005	139005	139005	139005	137331	97218	24950	1543	1543	1543b	N2	1289	104	2		wild_type	ERR2588183		Gori et al 2018
S. enterica	Napoli	2016_181312_5	SN38	2014	Italy	Italy	Lombardia	Monza	20900	ITC4		Human		7	14				SAL_RA9160AA	SAL_DB0899AA_AS	474	60	161	147	96	178	155	12	142	137339	137339	137339	137339	137339	107128	97218	24950	1543	1543	1543b	N2	1289	104	2		wild_type	ERR2588184		Gori et al 2018
S. enterica	Napoli	2016_181312_6	SN40	2014	Italy	Italy	Lombardia	Monza	20900	ITC4		Human		7	25				SAL_RA9159AA	SAL_DB0900AA_AS	474	60	161	147	96	178	155	12	142	137354	137354	137354	137354	137354	107044	24950	24950	1543	1543	1543b	N2	1289	104	2		wild_type	ERR2588185		Gori et al 2018
S. enterica	Napoli	2016_181312_7	SN44	2014	Italy	Italy	Lombardia	Monza	20900	ITC4		Human		7	31				SAL_RA9158AA	SAL_DB0901AA_AS	474	60	161	147	96	178	155	12	142	137356	137356	137356	137356	137346	107128	97218	24950	1543	1543	1543b	N2	1289	104	2		wild_type	ERR2588186		Gori et al 2018
S. enterica	Napoli	2016_181312_8	SN32	2014	Italy	Italy	Lombardia	Lodi	26900	ITC4		Human		8	8				SAL_RA9157AA	SAL_DB0902AA_AS	5140	60	161	147	96	178	155	814	142	137351	137351	137351	137351	106989	24950	24950	24950	1543	1543	1543b	N2	1289	104	2		wild_type	ERR2588187		Gori et al 2018
S. enterica	Napoli	ISS_04/01/15	Nap4-1-15	2014	Italy	Italy	Campania			ITF3		Food	Lettuce						SAL_ZA6860AA	SAL_SB4188AA_AS	4547	60	782	147	151	178	155	12	142	204979	204979	107062	107062	107062	107062	107019	107014	1450	1450	1450	N1	1289	104	2		wild_type	ERR16071756		This study
S. enterica	Napoli	ISS_05/02/15	Nap5-2-15	2014	Italy	Italy	Piemonte			ITC1		Human	Stool						SAL_ZA6861AA	SAL_SB4189AA_AS	474	60	161	147	96	178	155	12	142	204963	204963	204963	107076	107076	107076	107035	24950	1543	1543	1543b	N2	1289	104	2		wild_type	ERR16071769		This study
S. enterica	Napoli	ISS_10/01/15	Nap10-1-15	2014	Italy	Italy	Lazio			ITI4		Human	Stool						SAL_ZA6863AA	SAL_SB4191AA_AS	2095	60	161	147	151	178	155	12	142	204965	204965	204965	204965	204965	107046	1748	1748	1450	1450	1450	N1	1289	104	2		wild_type	ERR16071710		This study
S. enterica	Napoli	ISS_75/1/14	Nap75-1-14	2014	Italy	Italy	Campania			ITF3		Human	Stool						SAL_ZA6942AA	SAL_SB4284AA_AS	2095	60	161	147	151	178	155	12	142	205044	107060	107060	107060	107060	107060	1748	1748	1450	1450	1450	N1	1289	104	2		wild_type	ERR16071810		This study
S. enterica	Napoli	ISS_85/15/14	Nap85-15-14	2014	Italy	Italy	Piemonte			ITC1		Environment	Water-surface						SAL_ZA6960AA	SAL_SB4302AA_AS	474	60	161	147	96	178	155	12	142	205063	107127	107127	107127	107127	107089	97218	24950	1543	1543	1543b	N2	1289	104	2		wild_type	ERR16071830		This study
S. enterica	Napoli	ISS_85/16/14	Nap85-16-14	2014	Italy	Italy	Piemonte			ITC1		Human	Stool						SAL_ZA6962AA	SAL_SB4304AA_AS	7215	60	161	147	96	1425	155	12	142	205066	205066	205066	205066	205066	205066	107059	107059	107023	107023	107023	N1	1289	104	2		wild_type	ERR16071831	CP163489-CP163490	This study
S. enterica	Napoli	ISS_96/1/14	Nap96-1-14	2014	Italy	Italy	Campania			ITF3		Animal	Companion_Canine_Canis-lupus-familiaris						SAL_ZA6978AA	SAL_SB4320AA_AS	2095	60	161	147	151	178	155	12	142	205080	205080	107063	107063	107063	107046	1748	1748	1450	1450	1450	N1	1289	104	2		wild_type	ERR16071843		This study
S. enterica	Napoli	ISS_96/2/14	Nap96-2-14	2014	Italy	Italy	Campania			ITF3		Animal	Wild_animal;Wild_Boar						SAL_ZA6980AA	SAL_SB4322AA_AS	2095	60	161	147	151	178	155	12	142	205084	107063	107063	107063	107063	107046	1748	1748	1450	1450	1450	N1	1289	104	2		wild_type	ERR16071844		This study
S. enterica	Napoli	ISS_98/1/14	Nap98-1-14	2014	Italy	Italy	Lazio			ITI4		Human	Stool						SAL_ZA6982AA	SAL_SB4324AA_AS	2095	60	161	147	151	178	155	12	142	205083	205083	205083	204965	204965	107046	1748	1748	1450	1450	1450	N1	1289	104	2		wild_type	ERR16071848		This study
S. enterica	Napoli	20154160	S20154160	2015	Spain		Valencia	Castellon		ES522		Human	Stool	9	18	Male	67		SAL_QB5600AA	SAL_ZC5491AA_AS	2019	60	161	147	348	178	155	12	142	344890	344890	344890	344890	344890	344890	344890	344890	344890	63054	63054	N1	1289	104	2		wild_type	ERR16088460		This study
S. enterica	Napoli	20154256	S20154256	2015	Spain	Spain	Cantabria	Cantabria		ES130		Animal	Bivalve_wild_Raw_clams	10	14			Isolated	SAL_QB5171AA	SAL_ZC5069AA_AS	474	60	161	147	96	178	155	12	142	344521	344521	344463	344463	344463	344463	344463	344463	343813	1543	1543c	N2	1289	104	2		wild_type	ERR16088461		This study
S. enterica	Napoli	20154257	S20154257	2015	Spain	Spain	Cantabria	Cantabria		ES130		Animal	Bivalve_wild_Raw_clams	10	14			Isolated	SAL_QB5149AA	SAL_ZC5046AA_AS	474	60	161	147	96	178	155	12	142	344506	344506	344463	344463	344463	344463	344463	344463	343813	1543	1543c	N2	1289	104	2		wild_type	ERR16088462		This study
S. enterica	Napoli	20154888	S20154888	2015	Spain	Spain	Asturias	Asturias		ES120		Human	Stool	7	23	Male	4	Isolated	SAL_QB5150AA	SAL_ZC5047AA_AS	474	60	161	147	96	178	155	12	142	344502	344502	344502	344502	344502	344502	344480	343813	343813	1543	1543c	N2	1289	104	2		wild_type	ERR16088463		This study
S. enterica	Napoli	20154889	S20154889	2015	Spain	Spain	Asturias	Asturias		ES120		Human	Stool	7	15	Male	81	Isolated	SAL_QB5169AA	SAL_ZC5066AA_AS	474	60	161	147	96	178	155	12	142	344518	344518	344518	344518	344518	344480	344480	343813	343813	1543	1543c	N2	1289	104	2		wild_type	ERR16088464		This study
S. enterica	Napoli	20154890	S20154890	2015	Spain	Spain	Asturias	Asturias		ES120		Human	Stool	7	17	Male	81	Isolated	SAL_QB5170AA	SAL_ZC5068AA_AS	474	60	161	147	96	178	155	12	142	344520	344518	344518	344518	344518	344480	344480	343813	343813	1543	1543c	N2	1289	104	2		wild_type	ERR16088465		This study
S. enterica	Napoli	20154900	S20154900	2015	Spain	Spain	Asturias	Asturias		ES120		Human	Stool	9	18	Male	23	Isolated	SAL_QB5167AA	SAL_ZC5064AA_AS	474	60	161	147	96	178	155	12	142	344523	344523	344523	344462	344462	343813	343813	343813	343813	1543	1543c	N2	1289	104	2		wild_type	ERR16088466		This study
S. enterica	Napoli	20154936	S20154936	2015	Spain	Spain	Asturias	Asturias		ES120		Human	Pus	8	21	Male	85	Isolated	SAL_QB5166AA	SAL_ZC5063AA_AS	474	60	161	147	96	178	155	12	142	344516	344516	344516	344516	344516	344516	344480	343813	343813	1543	1543c	N2	1289	104	2		wild_type	ERR16088467	CP163483	This study
S. enterica	Napoli	20154938	S20154938	2015	Spain	Spain	Asturias	Asturias		ES120		Human	Stool	8	14	Female	55	Isolated	SAL_QB5607AA	SAL_ZC7159AA_AS	474	60	161	147	96	178	155	12	142	346374	346374	346374	346374	344881	344881	344881	343813	343813	1543	1543c	N2	1289	104	2		wild_type	ERR16088468		This study
S. enterica	Napoli	20155692	S20155692	2015	Spain	Spain	Asturias	Asturias		ES120		Human	Stool	9	5	Male	73	Isolated	SAL_QB5604AA	SAL_ZC5495AA_AS	474	60	161	147	96	178	155	12	142	344889	344889	344889	344889	344889	344480	344480	343813	343813	1543	1543c	N2	1289	104	2		wild_type	ERR16088469		This study
S. enterica	Napoli	20161276	S20161276	2015	Spain	Spain	Asturias	Asturias		ES120		Human	Stool	8	9	Female	1	Isolated	SAL_QB5597AA	SAL_ZC5488AA_AS	474	60	161	147	96	178	155	12	142	344881	344881	344881	344881	344881	344881	344881	343813	343813	1543	1543c	N2	1289	104	2		wild_type	ERR16088470		This study
S. enterica	Napoli	UZH_N15-0209	NapN15-0209	2015	Switzerland		Espace Mittelland	EM	1784	CH02		Food							SAL_ZA6823AA	SAL_SB3399AA_AS	2095	60	161	147	151	178	155	12	142	204926	204926	204926	204926	204926	204926	204926	204926	204926	204926	204926	N1	1289	104	2		wild_type	ERR16062637		This study
S. enterica	Napoli	UZH_N15-0846	NapN15-846	2015	Switzerland	Switzerland	Ostschweiz	OS	8717	CH05		Human	Stool						SAL_ZA6822AA	SAL_SB3398AA_AS	474	60	161	147	96	178	155	12	142	204923	204923	204923	204923	204923	204917	97218	24950	1543	1543	1543b	N2	1289	104	2		wild_type	ERR16062638		This study
S. enterica	Napoli	UZH_N15-1085	NapN15-1085	2015	Switzerland	Switzerland	Nordwestschweiz	NW	4058	CH03		Human	Stool						SAL_ZA6821AA	SAL_SB3397AA_AS	474	60	161	147	96	178	155	12	142	204925	204925	204925	140601	140601	107128	97218	24950	1543	1543	1543b	N2	1289	104	2		wild_type	ERR16062639		This study
S. enterica	Napoli	UZH_N15-1328	NapN15-1328	2015	Switzerland	Switzerland	Nordwestschweiz	NW	4455	CH03		Human	Stool						SAL_ZA6824AA	SAL_SB3400AA_AS	474	60	161	147	96	178	155	12	142	204924	204924	204924	204899	140601	107128	97218	24950	1543	1543	1543b	N2	1289	104	2		wild_type	ERR16062640		This study
S. enterica	Napoli	UZH_N15-1419	NapN15-1419	2015	Switzerland	Switzerland	Zentralschweiz	ZS	6006	CH06		Environment							SAL_ZA6825AA	SAL_SB3401AA_AS	7173	60	161	147	96	NaN	155	12	142	204927	204927	204927	204927	204927	137329	97218	24950	1543	1543	1543b	N2	1289	104	2		wild_type	ERR16062641		This study
S. enterica	Napoli	UZH_N15-1671	NapN15-1671	2015	Switzerland	Switzerland	Tessin	TE	6864	CH07		Human	Blood						SAL_ZA6826AA	SAL_SB3416AA_AS	474	60	161	147	96	178	155	12	142	204930	204930	204930	204929	204869	137329	97218	24950	1543	1543	1543b	N2	1289	104	2		wild_type	ERR16062642		This study
S. enterica	Napoli	UZH_N15-1787	NapN15-1787	2015	Switzerland	Italy	Nordwestschweiz	NW	5235	CH03		Human	Stool						SAL_ZA6827AA	SAL_SB3417AA_AS	1637	60	161	163	96	178	155	12	142	204931	204931	204931	204931	204931	204931	204931	20879	20879	20879	20879	N2	1289	104	2		wild_type	ERR16062643		This study
S. enterica	Napoli	UZH_N15-1950	NapN15-1950	2015	Switzerland	Italy	Tessin	TE	6962	CH07		Human	Stool						SAL_ZA6828AA	SAL_SB3418AA_AS	2008	60	161	147	348	178	155	436	142	204928	204928	204928	7673	7673	7673	7673	7673	7673	7673	7673	N1	1289	104	2		wild_type	ERR16062644		This study
S. enterica	Napoli	1040-2015_S25		2015	Italy	Italy	Piemonte			ITC1		Animal	Livestock_Sus-scrofa						SAL_NA7991AA	SAL_YA5864AA_AS	474	60	161	147	96	178	155	12	142	106993	106993	106993	106993	106993	106993	106993	24950	1543	1543	1543b	N2	1289	104	2		wild_type	ERR2194277		Mastrorilli et al 2020
S. enterica	Napoli	105-2015_S17		2015	Italy	Italy	Lombardia			ITC4		Animal	Poultry						SAL_NA7989AA	SAL_YA5866AA_AS	1637	60	161	163	96	178	155	12	142	106991	106991	106991	106991	106991	106991	106991	20879	20879	20879	20879	N2	1289	104	2		wild_type	ERR2194279		Mastrorilli et al 2020
S. enterica	Napoli	16-174535_S1		2015	Italy	Italy	Campania			ITF3		Human	Stool						SAL_NA7923AA	SAL_YA5932AA_AS	2095	60	161	147	151	178	155	12	142	107103	107103	107103	107103	107103	1450	1450	1450	1450	1450	1450	N1	1289	104	2		wild_type	ERR2194345		Mastrorilli et al 2020
S. enterica	Napoli	16-174538_S2		2015	Italy	Italy	Campania			ITF3		Human	Stool						SAL_NA7920AA	SAL_YA5935AA_AS	2095	60	161	147	151	178	155	12	142	107052	107052	107052	107052	107052	107052	1748	1748	1450	1450	1450	N1	1289	104	2		wild_type	ERR2194348		Mastrorilli et al 2020
S. enterica	Napoli	16-174539_S3		2015	Italy	Italy	Campania			ITF3		Human	Stool						SAL_NA7919AA	SAL_YA5936AA_AS	2095	60	161	147	151	178	155	12	142	107051	107051	107051	107051	26646	1450	1450	1450	1450	1450	1450	N1	1289	104	2		wild_type	ERR2194349		Mastrorilli et al 2020
S. enterica	Napoli	954-2015_S18		2015	Italy	Italy	Campania			ITF3		Animal	Poultry						SAL_NA7857AA	SAL_YA5998AA_AS	474	60	161	147	96	178	155	12	142	107116	107116	107116	107116	107116	107116	107023	107023	107023	107023	107023	N1	1289	104	2		wild_type	ERR2194411		Mastrorilli et al 2020
S. enterica	Napoli	957-2015_S19		2015	Italy	Italy	Campania			ITF3		Animal	Livestock_Sus-scrofa						SAL_NA7856AA	SAL_YA5999AA_AS	2095	60	161	147	151	178	155	12	142	107115	107063	107063	107063	107063	107046	1748	1748	1450	1450	1450	N1	1289	104	2		wild_type	ERR2194412		Mastrorilli et al 2020
S. enterica	Napoli	964-2015_S20		2015	Italy	Italy	Campania			ITF3		Human							SAL_NA7855AA	SAL_YA6000AA_AS	2095	60	161	147	151	178	155	12	142	107121	107121	107121	107121	107121	107121	107014	107014	1450	1450	1450	N1	1289	104	2		wild_type	ERR2194413		Mastrorilli et al 2020
S. enterica	Napoli	965-2015_S21		2015	Italy	Italy	Campania			ITF3		Human							SAL_NA7854AA	SAL_YA6001AA_AS	474	60	161	147	96	178	155	12	142	107113	107113	107113	107113	107113	107024	107024	107024	107023	107023	107023	N1	1289	104	2		wild_type	ERR2194414		Mastrorilli et al 2020
S. enterica	Napoli	967-2015_S23		2015	Italy	Italy	Campania			ITF3		Human							SAL_NA7852AA	SAL_YA6003AA_AS	474	60	161	147	96	178	155	12	142	107114	107114	107114	107114	107114	107114	107059	107059	107023	107023	107023	N1	1289	104	2		wild_type	ERR2194416		Mastrorilli et al 2020
S. enterica	Napoli	ISS_65/3/15	Nap65-3-15	2015	Italy	Italy	Campania			ITF3		Human	Stool						SAL_ZA6925AA	SAL_SB4267AA_AS	2095	60	161	147	151	178	155	12	142	205028	205028	107053	107053	107053	1450	1450	1450	1450	1450	1450	N1	1289	104	2		wild_type	ERR16071793		This study
S. enterica	Napoli	ISS_65/4/15	Nap65-4-15	2015	Italy	Italy	Campania			ITF3		Human	Stool						SAL_ZA6926AA	SAL_SB4268AA_AS	2095	60	161	147	151	178	155	12	142	205029	205029	205029	205029	205029	107052	1748	1748	1450	1450	1450	N1	1289	104	2		wild_type	ERR16071794		This study
S. enterica	Napoli	ISS_65/6/15	Nap65-6-15	2015	Italy	Italy	Campania			ITF3		Human	Stool						SAL_ZA6927AA	SAL_SB4269AA_AS	2095	60	161	147	151	178	155	12	142	205030	205030	107100	107100	106988	3102	1748	1748	1450	1450	1450	N1	1289	104	2		wild_type	ERR16071795		This study
S. enterica	Napoli	ISS_85/36/15	Nap85-36-15	2015	Italy	Italy	Marche			ITI3		Environment	Water-surface						SAL_ZA6963AA	SAL_SB4305AA_AS	1637	60	161	163	96	178	155	12	142	205065	205065	205065	107079	107079	107079	107079	20879	20879	20879	20879	N2	1289	104	2		wild_type	ERR16071832		This study
S. enterica	Napoli	ISS_85/37/15	Nap85-37-15	2015	Italy	Italy	Marche			ITI3		Environment							SAL_ZA6964AA	SAL_SB4306AA_AS	1637	60	161	163	96	178	155	12	142	205071	205071	107074	107074	107074	107074	107074	20879	20879	20879	20879	N2	1289	104	2		wild_type	ERR16071833		This study
S. enterica	Napoli	142214		2015	United_Kingdom		unknown					Human	Homo_sapiens	8					SAL_FA4719AA	SAL_KA8017AA_AS	474	60	161	147	96	178	155	12	142	1289	1289	1289	1289	1289	1289	1289	1289	1289	1289	1289	N2	1289	104	2		wild_type	SRR3321513		unpublished
S. enterica	Napoli	2016LSAL03414		2016	France	France	Bretagne	56		FRH04		Food	chicken	9	13				SAL_IB5753AA	SAL_QC4041AA_AS	474	60	161	147	96	178	155	12	142	276326	204686	140665	140665	140665	140604	27729	27729	27729	1543	1543a	N2	1289	104	2		wild_type	ERR16094181		This study
S. enterica	Napoli	20163239	S20163239	2016	Spain	Spain	Castilla y leon	Valladolid		ES418		Human	Stool	7	8	Male	6	Isolated	SAL_QB5602AA	SAL_ZC5493AA_AS	474	60	161	147	96	178	155	12	142	344882	344882	344882	344882	344882	344881	344881	343813	343813	1543	1543c	N2	1289	104	2		wild_type	ERR16088473		This study
S. enterica	Napoli	20164082	S20164082	2016	Spain	Spain	Cantabria	Cantabria		ES130		Animal	Bivalve_wild_Raw_mussels	9	7			Isolated	SAL_QB7252AA	SAL_ZC7158AA_AS	474	60	161	147	96	178	155	12	142	346352	346057	346057	346057	343813	343813	343813	343813	343813	1543	1543c	N2	1289	104	2		wild_type	ERR16088474		This study
S. enterica	Napoli	20164083	S20164083	2016	Spain	Spain	Cantabria	Cantabria		ES130		Animal	Bivalve_wild_Raw_mussels	9	7			Isolated	SAL_QB6834AA	SAL_ZC6759AA_AS	474	60	161	147	96	178	155	12	142	346057	346057	346057	346057	343813	343813	343813	343813	343813	1543	1543c	N2	1289	104	2		wild_type	ERR16088475		This study
S. enterica	Napoli	20164236	S20164236	2016	Spain	Spain	Asturias	Asturias		ES120		Human	Stool	7	15	Female	79	Isolated	SAL_QB6836AA	SAL_ZC6761AA_AS	474	60	161	147	96	178	155	12	142	346046	346046	346046	346046	344881	344881	344881	343813	343813	1543	1543c	N2	1289	104	2		wild_type	ERR16088476		This study
S. enterica	Napoli	20166313	S20166313	2016	Spain	Spain	Asturias	Asturias		ES120		Human	Stool	11	28	Female	84	Isolated	SAL_QB6841AA	SAL_ZC6766AA_AS	474	60	161	147	96	178	155	12	142	346051	346051	346051	346051	346051	346051	344881	343813	343813	1543	1543c	N2	1289	104	2		wild_type	ERR16088477		This study
S. enterica	Napoli	UZH_N16-0214	NapN16-214	2016	Switzerland	Switzerland	Tessin	TE	6864	CH07		Human	Urine						SAL_ZA6829AA	SAL_SB3419AA_AS	474	60	161	147	96	178	155	12	142	204929	204929	204929	204929	204869	137329	97218	24950	1543	1543	1543b	N2	1289	104	2		gyrA_D87G	ERR16062645		This study
S. enterica	Napoli	UZH_N16-0688	NapN16-688	2016	Switzerland	Switzerland	Nordwestschweiz	NW	4147	CH03		Human	Stool						SAL_ZA6830AA	SAL_SB3420AA_AS	474	60	161	147	96	178	155	12	142	204933	204933	204933	204933	204933	137331	97218	24950	1543	1543	1543b	N2	1289	104	2		wild_type	ERR16062646		This study
S. enterica	Napoli	UZH_N16-0823	NapN16-823	2016	Switzerland	Switzerland	Tessin	TE	6874	CH07		Human	Stool						SAL_ZA6831AA	SAL_SB3421AA_AS	474	60	161	147	96	178	155	12	142	204934	204934	204934	204934	204934	137319	97218	24950	1543	1543	1543b	N2	1289	104	2		wild_type	ERR16062647		This study
S. enterica	Napoli	UZH_N16-1063	NapN16-1063	2016	Switzerland	Switzerland	Tessin	TE	6915	CH07		Human	Stool						SAL_ZA6832AA	SAL_SB3422AA_AS	474	60	161	147	96	178	155	12	142	204932	204932	204932	204932	204886	204886	204886	24950	1543	1543	1543b	N2	1289	104	2		wild_type	ERR16062648		This study
S. enterica	Napoli	UZH_N16-1306	NapN16-1306	2016	Switzerland	Switzerland	Tessin	TE	6950	CH07		Human	Stool						SAL_ZA6833AA	SAL_SB3437AA_AS	474	60	161	147	96	178	155	12	142	204936	204936	204936	204936	204879	24950	24950	24950	1543	1543	1543b	N2	1289	104	2		wild_type	ERR16062649		This study
S. enterica	Napoli	UZH_N16-1473	NapN16-1473	2016	Switzerland	Switzerland	Ostschweiz	OS	9536	CH05		Human	Blood						SAL_ZA6834AA	SAL_SB3438AA_AS	474	60	161	147	96	178	155	12	142	204935	204935	204935	204902	204902	137319	97218	24950	1543	1543	1543b	N2	1289	104	2		wild_type	ERR16062650		This study
S. enterica	Napoli	UZH_N16-1532	NapN16-1532	2016	Switzerland	Italy	Tessin	TE	6950	CH07		Human	Stool						SAL_ZA6835AA	SAL_SB3439AA_AS	474	60	161	147	96	178	155	12	142	204937	204937	204937	204937	204937	107116	107023	107023	107023	107023	107023	N1	1289	104	2		wild_type	ERR16062651		This study
S. enterica	Napoli	UZH_N16-1674	NapN16-1674	2016	Switzerland	Switzerland	Tessin	TE	6943	CH07		Human	Stool						SAL_ZA6836AA	SAL_SB3440AA_AS	474	60	161	147	96	178	155	12	142	204942	204942	204942	204936	204879	24950	24950	24950	1543	1543	1543b	N2	1289	104	2		wild_type	ERR16062652		This study
S. enterica	Napoli	UZH_N16-1705	NapN16-1705	2016	Switzerland		Espace Mittelland	EM	4702	CH02		Human	Stool						SAL_ZA6837AA	SAL_SB3441AA_AS	4372	60	161	147	96	178	774	12	142	204941	204941	204941	204941	204941	94666	94666	94666	94666	94666	94666	N2	1289	104	2		wild_type	ERR16062653		This study
S. enterica	Napoli	UZH_N16-1951	NapN16-1951	2016	Switzerland	Italy	Zentralschweiz	ZS	6002	CH06		Human	Stool						SAL_ZA6838AA	SAL_SB3442AA_AS	2008	60	161	147	348	178	155	436	142	204938	204938	204938	204938	63315	7814	7673	7673	7673	7673	7673	N1	1289	104	2	blaTEM-1,tet(A)	wild_type	ERR16062654		This study
S. enterica	Napoli	UZH_N16-2405	NapN16-2405	2016	Switzerland	Switzerland	Tessin	TE	6912	CH07		Human							SAL_ZA6839AA	SAL_SB3443AA_AS	474	60	161	147	96	178	155	12	142	204940	204940	204940	204940	140600	107044	24950	24950	1543	1543	1543b	N2	1289	104	2		wild_type	ERR16062655		This study
S. enterica	Napoli	UZH_N16-2692	NapN16-2692	2016	Switzerland	Switzerland	Nordwestschweiz	NW	4058	CH03		Human	Stool						SAL_ZA6840AA	SAL_SB3444AA_AS	474	60	161	147	96	178	155	12	142	204939	204939	204925	140601	140601	107128	97218	24950	1543	1543	1543b	N2	1289	104	2		wild_type	ERR16062656		This study
S. enterica	Napoli	201609044	Nap16-9044	2016	France	France	Nouvelle-Aquitaine	87		FRI23		Environment	Water						SAL_BB1112AA	SAL_VB3858AA_AS	474	60	161	147	96	178	155	12	142	214078	214078	214078	214078	176319	176319	27733	27733	27729	1543	1543a	N2	1289	104	2		wild_type	ERR16083419		This study
S. enterica	Napoli	16-137932_S20		2016	Italy	Italy	Veneto			ITH3		Animal	Bivalve_wild						SAL_NA7971AA	SAL_YA5884AA_AS	1637	60	161	163	96	178	155	12	142	107031	107031	107031	107031	107031	107031	107031	20879	20879	20879	20879	N2	1289	104	2		wild_type	ERR2194297		Mastrorilli et al 2020
S. enterica	Napoli	16-174466_S14		2016	Italy	Italy	Campania			ITF3		Animal	Buteo_wild_Organs						SAL_NA7970AA	SAL_YA5885AA_AS	2095	60	161	147	151	178	155	12	142	107027	107027	107027	107027	26646	1450	1450	1450	1450	1450	1450	N1	1289	104	2		wild_type	ERR2194298		Mastrorilli et al 2020
S. enterica	Napoli	16-174470_S6		2016	Italy	Italy	Campania			ITF3		Animal	Livestock_Sus-scrofa_organs						SAL_NA7969AA	SAL_YA5886AA_AS	2019	60	161	147	348	178	155	12	142	107026	107026	107026	107026	107026	107013	107013	107013	107013	7673	7673	N1	1289	104	2		wild_type	ERR2194299		Mastrorilli et al 2020
S. enterica	Napoli	16-174471_S15		2016	Italy	Italy	Campania			ITF3		Animal	Livestock_Sus-scrofa_organs						SAL_NA7968AA	SAL_YA5887AA_AS	2019	60	161	147	348	178	155	12	142	107026	107026	107026	107026	107026	107013	107013	107013	107013	7673	7673	N1	1289	104	2		wild_type	ERR2194300		Mastrorilli et al 2020
S. enterica	Napoli	16-174472_S16		2016	Italy	Italy	Campania			ITF3									SAL_NA7967AA	SAL_YA5888AA_AS	2008	60	161	147	348	178	155	436	142	106987	106987	106987	106987	106987	7814	7673	7673	7673	7673	7673	N1	1289	104	2		wild_type	ERR2194301		Mastrorilli et al 2020
S. enterica	Napoli	16-174473_S17		2016	Italy	Italy	Campania			ITF3									SAL_NA7966AA	SAL_YA5889AA_AS	2019	60	161	147	348	178	155	12	142	106986	106986	106986	106986	106986	106986	20425	7673	7673	7673	7673	N1	1289	104	2		wild_type	ERR2194302		Mastrorilli et al 2020
S. enterica	Napoli	16-174474_S18		2016	Italy	Italy	Campania			ITF3		Environment	Water						SAL_NA7965AA	SAL_YA5890AA_AS	2008	60	161	147	348	178	155	436	142	106985	106985	106985	106985	25000	20403	20403	7673	7673	7673	7673	N1	1289	104	2		wild_type	ERR2194303		Mastrorilli et al 2020
S. enterica	Napoli	16-174475_S19		2016	Italy	Italy	Campania			ITF3		Environment	Water-River						SAL_NA7964AA	SAL_YA5891AA_AS	2008	60	161	147	348	178	155	436	142	110452	110452	110452	110452	110452	20408	7673	7673	7673	7673	7673	N1	1289	104	2		wild_type	ERR2194304		Mastrorilli et al 2020
S. enterica	Napoli	16-174477_S7		2016	Italy	Italy	Campania			ITF3		Human							SAL_NA7963AA	SAL_YA5892AA_AS	2095	60	161	147	151	178	155	12	142	110451	110451	110451	110451	110451	110450	107014	107014	1450	1450	1450	N1	1289	104	2		wild_type	ERR2194305		Mastrorilli et al 2020
S. enterica	Napoli	16-174480_S20		2016	Italy	Italy	Campania			ITF3		Animal	Buteo_wild_Organs						SAL_NA7961AA	SAL_YA5894AA_AS	474	60	161	147	96	178	155	12	142	107024	107024	107024	107024	107024	107024	107024	107024	107023	107023	107023	N1	1289	104	2		wild_type	ERR2194307		Mastrorilli et al 2020
S. enterica	Napoli	16-174481_S8		2016	Italy	Italy	Campania			ITF3		Environment	Water						SAL_NA7960AA	SAL_YA5895AA_AS	2008	60	161	147	348	178	155	436	142	107073	107073	107073	107073	107073	7814	7673	7673	7673	7673	7673	N1	1289	104	2		wild_type	ERR2194308		Mastrorilli et al 2020
S. enterica	Napoli	16-174484_S9		2016	Italy	Italy	Campania			ITF3		Animal	Poultry_Stool						SAL_NA7959AA	SAL_YA5896AA_AS	474	60	161	147	96	178	155	12	142	107023	107023	107023	107023	107023	107023	107023	107023	107023	107023	107023	N1	1289	104	2		wild_type	ERR2194309		Mastrorilli et al 2020
S. enterica	Napoli	16-174485_S21		2016	Italy	Italy	Campania			ITF3		Animal	Poultry_Stool						SAL_NA7958AA	SAL_YA5897AA_AS	474	60	161	147	96	178	155	12	142	107023	107023	107023	107023	107023	107023	107023	107023	107023	107023	107023	N1	1289	104	2		wild_type	ERR2194310		Mastrorilli et al 2020
S. enterica	Napoli	16-174486_S22		2016	Italy	Italy	Campania			ITF3		Environment	Water						SAL_NA7957AA	SAL_YA5898AA_AS	2019	60	161	147	348	178	155	12	142	107021	107021	107021	107021	107021	20426	20426	20426	7673	7673	7673	N1	1289	104	2		wild_type	ERR2194311		Mastrorilli et al 2020
S. enterica	Napoli	16-174487_S23		2016	Italy	Italy	Campania			ITF3		Environment	Water						SAL_NA7956AA	SAL_YA5899AA_AS	2019	60	161	147	348	178	155	12	142	107018	107018	107018	107018	107018	107018	107018	7673	7673	7673	7673	N1	1289	104	2		wild_type	ERR2194312		Mastrorilli et al 2020
S. enterica	Napoli	16-174488_S10		2016	Italy	Italy	Campania			ITF3		Environment	Water						SAL_NA7955AA	SAL_YA5900AA_AS	2019	60	161	147	348	178	155	12	142	107017	107017	107017	107017	107017	20426	20426	20426	7673	7673	7673	N1	1289	104	2		wild_type	ERR2194313		Mastrorilli et al 2020
S. enterica	Napoli	16-174489_S24		2016	Italy	Italy	Campania			ITF3		Environment	Water						SAL_NA7954AA	SAL_YA5901AA_AS	2019	60	161	147	348	178	155	12	142	107104	107104	107104	107104	107104	107104	20426	20426	7673	7673	7673	N1	1289	104	2		wild_type	ERR2194314		Mastrorilli et al 2020
S. enterica	Napoli	16-174490_S25		2016	Italy	Italy	Campania			ITF3		Environment	Water						SAL_NA7953AA	SAL_YA5902AA_AS	2008	60	161	147	348	178	155	436	142	107106	107106	107106	107106	107106	107106	7673	7673	7673	7673	7673	N1	1289	104	2		wild_type	ERR2194315		Mastrorilli et al 2020
S. enterica	Napoli	16-174491_S26		2016	Italy	Italy	Campania			ITF3		Environment	Water						SAL_NA7952AA	SAL_YA5903AA_AS	2008	60	161	147	348	178	155	436	142	107020	107020	107020	107020	107020	7814	7673	7673	7673	7673	7673	N1	1289	104	2		wild_type	ERR2194316		Mastrorilli et al 2020
S. enterica	Napoli	16-174492_S11		2016	Italy	Italy	Campania			ITF3		Environment	Water						SAL_NA7951AA	SAL_YA5904AA_AS	2019	60	161	147	348	178	155	12	142	107072	107072	107072	107072	107072	20425	20425	7673	7673	7673	7673	N1	1289	104	2		wild_type	ERR2194317		Mastrorilli et al 2020
S. enterica	Napoli	16-174493_S12		2016	Italy	Italy	Campania			ITF3		Environment	Water						SAL_NA7950AA	SAL_YA5905AA_AS	2008	60	161	147	348	178	155	436	142	107071	107071	107071	107071	107071	20408	7673	7673	7673	7673	7673	N1	1289	104	2		wild_type	ERR2194318		Mastrorilli et al 2020
S. enterica	Napoli	16-174495_S13		2016	Italy	Italy	Campania			ITF3		Environment	Water						SAL_NA7949AA	SAL_YA5906AA_AS	2019	60	161	147	348	178	155	12	142	107022	107022	107022	107022	107022	20426	20426	20426	7673	7673	7673	N1	1289	104	2		wild_type	ERR2194319		Mastrorilli et al 2020
S. enterica	Napoli	16-174496_S14		2016	Italy	Italy	Campania			ITF3		Environment	Water						SAL_NA7948AA	SAL_YA5907AA_AS	2008	60	161	147	348	178	155	436	142	107070	107070	107070	107070	20403	20403	20403	7673	7673	7673	7673	N1	1289	104	2		wild_type	ERR2194320		Mastrorilli et al 2020
S. enterica	Napoli	16-174499_S27		2016	Italy	Italy	Campania			ITF3		Environment	Water						SAL_NA7947AA	SAL_YA5908AA_AS	2008	60	161	147	348	178	155	436	142	107016	107016	107016	107016	20403	20403	20403	7673	7673	7673	7673	N1	1289	104	2		wild_type	ERR2194321		Mastrorilli et al 2020
S. enterica	Napoli	16-174500_S28		2016	Italy	Italy	Campania			ITF3		Environment	Water						SAL_NA7946AA	SAL_YA5909AA_AS	2101	60	495	147	348	178	155	436	142	107011	107011	107011	107011	25464	20403	20403	7673	7673	7673	7673	N1	1289	104	2		wild_type	ERR2194322		Mastrorilli et al 2020
S. enterica	Napoli	16-174501_S15		2016	Italy	Italy	Campania			ITF3		Human							SAL_NA7945AA	SAL_YA5910AA_AS	2019	60	161	147	348	178	155	12	142	107013	107013	107013	107013	107013	107013	107013	107013	107013	7673	7673	N1	1289	104	2		wild_type	ERR2194323		Mastrorilli et al 2020
S. enterica	Napoli	16-174502_S16		2016	Italy	Italy	Calabria			ITF6		Human							SAL_NA7944AA	SAL_YA5911AA_AS	474	60	161	147	96	178	155	12	142	107069	107069	107069	107069	107036	107036	107023	107023	107023	107023	107023	N1	1289	104	2		wild_type	ERR2194324		Mastrorilli et al 2020
S. enterica	Napoli	16-174503_S17		2016	Italy	Italy	Calabria			ITF6		Human							SAL_NA7943AA	SAL_YA5912AA_AS	474	60	161	147	96	178	155	12	142	107068	107068	107068	107068	107068	107068	107059	107059	107023	107023	107023	N1	1289	104	2		wild_type	ERR2194325		Mastrorilli et al 2020
S. enterica	Napoli	16-174505_S18		2016	Italy	Italy	Campania			ITF3		Human							SAL_NA7942AA	SAL_YA5913AA_AS	2095	60	161	147	151	178	155	12	142	107012	107012	107012	107012	107012	107012	1748	1748	1450	1450	1450	N1	1289	104	2		wild_type	ERR2194326		Mastrorilli et al 2020
S. enterica	Napoli	16-174506_S19		2016	Italy	Italy	Campania			ITF3		Human							SAL_NA7941AA	SAL_YA5914AA_AS	2095	60	161	147	151	178	155	12	142	107067	107067	107067	107067	107045	1450	1450	1450	1450	1450	1450	N1	1289	104	2		wild_type	ERR2194327		Mastrorilli et al 2020
S. enterica	Napoli	16-174508_S29		2016	Italy	Italy				ITF3		Human	Stool						SAL_NA7940AA	SAL_YA5915AA_AS	4547	60	782	147	151	178	155	12	142	107019	107019	107019	107019	107019	107019	107019	107014	1450	1450	1450	N1	1289	104	2		wild_type	ERR2194328		Mastrorilli et al 2020
S. enterica	Napoli	16-174509_S20		2016	Italy	Italy	Calabria			ITF6		Human							SAL_NA7939AA	SAL_YA5916AA_AS	474	60	161	147	96	178	155	12	142	107066	107066	107066	107066	107066	107024	107024	107024	107023	107023	107023	N1	1289	104	2		wild_type	ERR2194329		Mastrorilli et al 2020
S. enterica	Napoli	16-174510_S21		2016	Italy	Italy	Calabria			ITF6		Human							SAL_NA7938AA	SAL_YA5917AA_AS	474	60	161	147	96	178	155	12	142	107065	107065	107065	107065	107065	107064	107024	107024	107023	107023	107023	N1	1289	104	2		wild_type	ERR2194330		Mastrorilli et al 2020
S. enterica	Napoli	16-174511_S22		2016	Italy	Italy	Campania			ITF3		Food	food						SAL_NA7937AA	SAL_YA5918AA_AS	474	60	161	147	96	178	155	12	142	107064	107064	107064	107064	107064	107064	107024	107024	107023	107023	107023	N1	1289	104	2		wild_type	ERR2194331		Mastrorilli et al 2020
S. enterica	Napoli	16-174512_S30		2016	Italy	Italy	Campania			ITF3		Food	food						SAL_NA7936AA	SAL_YA5919AA_AS	2095	60	161	147	151	178	155	12	142	107014	107014	107014	107014	107014	107014	107014	107014	1450	1450	1450	N1	1289	104	2		wild_type	ERR2194332		Mastrorilli et al 2020
S. enterica	Napoli	16-174515_S23		2016	Italy	Italy	Campania			ITF3		Animal	Livestock_Sus-scrofa_organs						SAL_NA7935AA	SAL_YA5920AA_AS	2095	60	161	147	151	178	155	12	142	107063	107063	107063	107063	107063	107046	1748	1748	1450	1450	1450	N1	1289	104	2		wild_type	ERR2194333		Mastrorilli et al 2020
S. enterica	Napoli	16-174516_S24		2016	Italy	Italy	Campania			ITF3		Food	food						SAL_NA7934AA	SAL_YA5921AA_AS	4547	60	782	147	151	178	155	12	142	107062	107062	107062	107062	107062	107062	107019	107014	1450	1450	1450	N1	1289	104	2		wild_type	ERR2194334		Mastrorilli et al 2020
S. enterica	Napoli	16-174518_S31		2016	Italy	Italy	unknown					Human	Stool						SAL_NA7933AA	SAL_YA5922AA_AS	2095	60	161	147	151	178	155	12	142	107067	107067	107067	107067	107045	1450	1450	1450	1450	1450	1450	N1	1289	104	2		wild_type	ERR2194335		Mastrorilli et al 2020
S. enterica	Napoli	16-174519_S25		2016	Italy	Italy	Campania			ITF3		Human							SAL_NA7932AA	SAL_YA5923AA_AS	4547	60	782	147	151	178	155	12	142	107061	107061	107061	107061	107061	107061	107019	107014	1450	1450	1450	N1	1289	104	2		wild_type	ERR2194336		Mastrorilli et al 2020
S. enterica	Napoli	16-174520_S32		2016	Italy	Italy	Campania			ITF3		Human	Stool						SAL_NA7931AA	SAL_YA5924AA_AS	2095	60	161	147	151	178	155	12	142	107060	107060	107060	107060	107060	107060	1748	1748	1450	1450	1450	N1	1289	104	2		wild_type	ERR2194337		Mastrorilli et al 2020
S. enterica	Napoli	16-174522_S33		2016	Italy	Italy	Campania			ITF3		Human	Stool						SAL_NA7930AA	SAL_YA5925AA_AS	2095	60	161	147	151	178	155	12	142	107015	107015	107015	107015	107015	1450	1450	1450	1450	1450	1450	N1	1289	104	2		wild_type	ERR2194338		Mastrorilli et al 2020
S. enterica	Napoli	16-174529_S26		2016	Italy	Italy	Campania			ITF3		Animal	Vulpes_wild_organs						SAL_NA7929AA	SAL_YA5926AA_AS	474	60	161	147	96	178	155	12	142	107059	107059	107059	107059	107059	107059	107059	107059	107023	107023	107023	N1	1289	104	2		wild_type	ERR2194339		Mastrorilli et al 2020
S. enterica	Napoli	16-174530_S27		2016	Italy	Italy	Campania			ITF3		Animal	Livestock_Sus-scrofa_organs						SAL_NA7928AA	SAL_YA5927AA_AS	2019	60	161	147	348	178	155	12	142	107058	107058	107058	107058	107058	107058	107018	7673	7673	7673	7673	N1	1289	104	2		wild_type	ERR2194340		Mastrorilli et al 2020
S. enterica	Napoli	16-174531_S34		2016	Italy	Italy	Campania			ITF3		Animal	Livestock_Sus-scrofa_Stool						SAL_NA7927AA	SAL_YA5928AA_AS	2019	60	161	147	348	178	155	12	142	107057	107057	107057	107057	107057	107057	107057	107057	107057	7673	7673	N1	1289	104	2		wild_type	ERR2194341		Mastrorilli et al 2020
S. enterica	Napoli	16-174532_S28		2016	Italy	Italy	Campania			ITF3		Human							SAL_NA7926AA	SAL_YA5929AA_AS	474	60	161	147	96	178	155	12	142	107056	107056	107056	107056	107056	107024	107024	107024	107023	107023	107023	N1	1289	104	2		wild_type	ERR2194342		Mastrorilli et al 2020
S. enterica	Napoli	16-174533_S35		2016	Italy	Italy	Campania			ITF3		Human							SAL_NA7925AA	SAL_YA5930AA_AS	474	60	161	147	96	178	155	12	142	107055	107055	107055	107055	107055	107024	107024	107024	107023	107023	107023	N1	1289	104	2		wild_type	ERR2194343		Mastrorilli et al 2020
S. enterica	Napoli	16-174534_S29		2016	Italy		Campania			ITF3		Human							SAL_NA7924AA	SAL_YA5931AA_AS	2019	60	161	147	348	178	155	12	142	107054	107054	107054	107054	107054	107054	107054	63054	63054	63054	63054	N1	1289	104	2		wild_type	ERR2194344		Mastrorilli et al 2020
S. enterica	Napoli	16-174536_S6		2016	Italy	Italy	Campania			ITF3		Human	Stool						SAL_NA7922AA	SAL_YA5933AA_AS	2095	60	161	147	151	178	155	12	142	107101	107101	107101	107101	107101	107101	107014	107014	1450	1450	1450	N1	1289	104	2		wild_type	ERR2194346		Mastrorilli et al 2020
S. enterica	Napoli	16-174537_S30		2016	Italy	Italy	Campania			ITF3		Human							SAL_NA7921AA	SAL_YA5934AA_AS	2095	60	161	147	151	178	155	12	142	107053	107053	107053	107053	107053	1450	1450	1450	1450	1450	1450	N1	1289	104	2		wild_type	ERR2194347		Mastrorilli et al 2020
S. enterica	Napoli	16-174540_S31		2016	Italy	Italy	Campania			ITF3		Human							SAL_NA7918AA	SAL_YA5937AA_AS	2095	60	161	147	151	178	155	12	142	107100	107100	107100	107100	106988	3102	1748	1748	1450	1450	1450	N1	1289	104	2		wild_type	ERR2194350		Mastrorilli et al 2020
S. enterica	Napoli	16-174541_S32		2016	Italy	Italy	Campania			ITF3									SAL_NA7917AA	SAL_YA5938AA_AS	2019	60	161	147	348	178	155	12	142	107050	107050	107050	107050	107050	107050	107050	7673	7673	7673	7673	N1	1289	104	2		wild_type	ERR2194351		Mastrorilli et al 2020
S. enterica	Napoli	16-174542_S33		2016	Italy	Italy	Campania			ITF3									SAL_NA7916AA	SAL_YA5939AA_AS	2019	60	161	147	348	178	155	12	142	107099	107099	107099	107099	107099	107099	25097	25097	7673	7673	7673	N1	1289	104	2		wild_type	ERR2194352		Mastrorilli et al 2020
S. enterica	Napoli	16-174543_S34		2016	Italy	Italy	Campania			ITF3									SAL_NA7915AA	SAL_YA5940AA_AS	2095	60	161	147	151	178	155	12	142	107049	107049	107049	107049	107049	107049	107049	107049	1450	1450	1450	N1	1289	104	2		wild_type	ERR2194353		Mastrorilli et al 2020
S. enterica	Napoli	16-174544_S35		2016	Italy	Italy	Campania			ITF3		Human							SAL_NA7914AA	SAL_YA5941AA_AS	2095	60	161	147	151	178	155	12	142	107048	107048	107048	107048	107048	1748	1748	1748	1450	1450	1450	N1	1289	104	2		wild_type	ERR2194354		Mastrorilli et al 2020
S. enterica	Napoli	16-174545_S36		2016	Italy	Italy	Campania			ITF3		Human							SAL_NA7913AA	SAL_YA5942AA_AS	2008	60	161	147	348	178	155	436	142	107047	107047	107047	107047	107047	100539	7673	7673	7673	7673	7673	N1	1289	104	2		wild_type	ERR2194355		Mastrorilli et al 2020
S. enterica	Napoli	16-174546_S1		2016	Italy	Italy	Campania			ITF3		Human	Stool						SAL_NA7912AA	SAL_YA5943AA_AS	2095	60	161	147	151	178	155	12	142	107046	107046	107046	107046	107046	107046	1748	1748	1450	1450	1450	N1	1289	104	2		wild_type	ERR2194356		Mastrorilli et al 2020
S. enterica	Napoli	16-174547_S2		2016	Italy	Italy	Campania			ITF3		Human	Stool						SAL_NA7911AA	SAL_YA5944AA_AS	2095	60	161	147	151	178	155	12	142	107045	107045	107045	107045	107045	1450	1450	1450	1450	1450	1450	N1	1289	104	2		wild_type	ERR2194357		Mastrorilli et al 2020
S. enterica	Napoli	16-174548_S4		2016	Italy	Italy	Campania			ITF3		Human	blood						SAL_NA7910AA	SAL_YA5945AA_AS	2095	60	161	147	151	178	155	12	142	107105	107105	107105	107101	107101	107101	107014	107014	1450	1450	1450	N1	1289	104	2		wild_type	ERR2194358		Mastrorilli et al 2020
S. enterica	Napoli	ISS_55/25/16	Nap55-25-16	2016	Italy	Italy	Campania			ITF3		Human	Stool						SAL_ZA6910AA	SAL_SB4252AA_AS	2095	60	161	147	151	178	155	12	142	205015	107048	107048	107048	107048	1748	1748	1748	1450	1450	1450	N1	1289	104	2		wild_type	ERR16071778		This study
S. enterica	Napoli	ISS_55/27/16	Nap55-27-16	2016	Italy	Italy	Campania			ITF3		Human	Stool						SAL_ZA6911AA	SAL_SB4253AA_AS	2008	60	161	147	348	178	155	436	142	205014	205014	205014	107047	107047	100539	7673	7673	7673	7673	7673	N1	1289	104	2		wild_type	ERR16071779		This study
S. enterica	Napoli	2017LSAL02714		2017	France	France	Pays-de-la-Loire	85	85607 (product transformation location)	FRG05		Food	lettuce_Valerianella-locusta	7	27				SAL_IB5756AA	SAL_QC4044AA_AS	474	60	161	147	96	178	155	12	142	276329	214083	214083	204722	140749	130700	27729	27729	27729	1543	1543a	N2	1289	104	2		wild_type	ERR16094182		This study
S. enterica	Napoli	20172535	S20172535	2017	Spain	Italy	Catalunya	Barcelona		ES511		Human	Stool	8	25	Male	71		SAL_QB5603AA	SAL_ZC5494AA_AS	2008	60	161	147	348	178	155	436	142	344883	344883	344883	344883	204866	100539	7673	7673	7673	7673	7673	N1	1289	104	2		wild_type	ERR16088478		This study
S. enterica	Napoli	20173376	S20173376	2017	Spain	Spain	Asturias	Asturias		ES120		Human	Stool	9	18	Female	28	Isolated	SAL_QB6839AA	SAL_ZC6764AA_AS	474	60	161	147	96	178	155	12	142	346054	346054	346054	346054	346054	346054	344480	343813	343813	1543	1543c	N2	1289	104	2		wild_type	ERR16088479		This study
S. enterica	Napoli	20173386	S20173386	2017	Spain	Spain	Asturias	Asturias		ES120		Human	Stool	10	17	Female	94	Isolated	SAL_QB6838AA	SAL_ZC6763AA_AS	474	60	161	147	96	178	155	12	142	346059	346059	346059	346059	346059	343813	343813	343813	343813	1543	1543c	N2	1289	104	2		wild_type	ERR16088480		This study
S. enterica	Napoli	20173409	S20173409	2017	Spain	Spain	Asturias	Asturias		ES120		Human	Stool	8	17	Male	69	Isolated	SAL_QB6843AA	SAL_ZC6768AA_AS	474	60	161	147	96	178	155	12	142	346056	346056	346056	346056	346056	343813	343813	343813	343813	1543	1543c	N2	1289	104	2		wild_type	ERR16088481		This study
S. enterica	Napoli	UZH_N17-0080	NapN17-80	2017	Switzerland	Italy	Ostschweiz	OS	7402	CH05		Human	Stool						SAL_ZA6841AA	SAL_SB3459AA_AS	2008	60	161	147	348	178	155	436	142	204943	204943	204943	204943	204943	100539	7673	7673	7673	7673	7673	N1	1289	104	2		wild_type	ERR16062657		This study
S. enterica	Napoli	UZH_N17-0661	NapN17-661	2017	Switzerland	Switzerland	Nordwestschweiz	NW	4123	CH03		Human	Stool						SAL_ZA6842AA	SAL_SB3460AA_AS	474	60	161	147	96	178	155	12	142	204944	204944	204944	204944	204944	204944	204944	204873	204873	1543	1543a	N2	1289	104	2		wild_type	ERR16062658		This study
S. enterica	Napoli	UZH_N17-0949	NapN17-949	2017	Switzerland	Switzerland	Tessin	TE	6989	CH07		Human	Stool						SAL_ZA6843AA	SAL_SB3461AA_AS	474	60	161	147	96	178	155	12	142	204948	204948	204948	204948	204948	204905	204905	24950	1543	1543	1543b	N2	1289	104	2		wild_type	ERR16062659		This study
S. enterica	Napoli	UZH_N17-1100	NapN17-1100	2017	Switzerland	Italy	Zentralschweiz	ZS	6207	CH06		Human	Blood						SAL_ZA6844AA	SAL_SB3462AA_AS	2008	60	161	147	348	178	155	436	142	204949	204949	204949	204949	204949	20403	20403	7673	7673	7673	7673	N1	1289	104	2		wild_type	ERR16062660		This study
S. enterica	Napoli	UZH_N17-1576	NapN17-1576	2017	Switzerland		Nordwestschweiz	NW	5001	CH03		Human	Stool						SAL_ZA6845AA	SAL_SB3463AA_AS	4354	60	161	685	151	178	155	12	142	204946	204946	204946	204946	204946	204946	94001	94001	94001	94001	94001	N1	1289	104	2		wild_type	ERR16062661		This study
S. enterica	Napoli	UZH_N17-1651	NapN17-1651	2017	Switzerland	Italy	Espace Mittelland	EM	3073	CH02		Human	Stool						SAL_ZA6846AA	SAL_SB3464AA_AS	4277	60	759	147	151	178	155	12	142	204947	204947	204947	204947	204947	204947	204898	88024	88024	1450	1450	N1	1289	104	2		wild_type	ERR16062662		This study
S. enterica	Napoli	UZH_N17-1896	NapN17-1896	2017	Switzerland	Switzerland	Tessin	TE	6965	CH07		Human	Stool						SAL_ZA6847AA	SAL_SB3465AA_AS	474	60	161	147	96	178	155	12	142	204951	204951	204951	204951	204905	204905	204905	24950	1543	1543	1543b	N2	1289	104	2		wild_type	ERR16062663		This study
S. enterica	Napoli	UZH_N17-2017	NapN17-2017	2017	Switzerland	Switzerland	Zürich	ZH	8422	CH04		Human	Stool						SAL_ZA6849AA	SAL_SB3481AA_AS	7174	60	161	147	96	178	1139	12	142	204952	204952	204950	204950	204950	107128	97218	24950	1543	1543	1543b	N2	1289	104	2		wild_type	ERR16062664		This study
S. enterica	Napoli	UZH_N17-2180	NapN17-2180	2017	Switzerland	Switzerland	Zürich	ZH	8422	CH04		Human	Stool						SAL_ZA6848AA	SAL_SB3480AA_AS	7174	60	161	147	96	178	1139	12	142	204950	204950	204950	204950	204950	107128	97218	24950	1543	1543	1543b	N2	1289	104	2		wild_type	ERR16062665		This study
S. enterica	Napoli	UZH_N17-2234	NapN17-2234	2017	Switzerland	Switzerland	Tessin	TE	6877	CH07		Human	Stool						SAL_ZA6850AA	SAL_SB3482AA_AS	474	60	161	147	96	178	155	12	142	204953	204953	204953	204929	204869	137329	97218	24950	1543	1543	1543b	N2	1289	104	2		wild_type	ERR16062666		This study
S. enterica	Napoli	UZH_N17-2438	NapN17-2438	2017	Switzerland	Switzerland	Ostschweiz	OS	7000	CH05		Human	Stool						SAL_ZA6851AA	SAL_SB3483AA_AS	474	60	161	147	96	178	155	12	142	204954	204954	204954	204954	204954	107128	97218	24950	1543	1543	1543b	N2	1289	104	2		wild_type	ERR16062667		This study
S. enterica	Napoli	UZH_N17-2632	NapN17-2632	2017	Switzerland	Switzerland	Nordwestschweiz	NW	4441	CH03		Human	Stool						SAL_ZA6852AA	SAL_SB3484AA_AS	474	60	161	147	96	178	155	12	142	204959	204959	204959	204871	204871	204871	107093	24950	1543	1543	1543b	N2	1289	104	2		wild_type	ERR16062668		This study
S. enterica	Napoli	201705344		2017	France	France	Nouvelle-Aquitaine	17	17220	FRI32		Human	Stool	7	5	Female	2	Family	SAL_SA4201AA	SAL_DB8784AA_AS	5170	60	161	781	96	178	155	12	142	140706	140706	140706	140706	140706	140706	140623	140623	27729	1543	1543a	N2	1289	104	2		wild_type	ERR16083490		This study
S. enterica	Napoli	201707006		2017	France		Ile-de-France	94	94400	FR107	No Travel declared	Human	Blood	8	10	Male	70	Isolated	SAL_SA4182AA	SAL_DB8765AA_AS	2019	60	161	147	348	178	155	12	142	140691	140691	140691	140691	140691	140691	20426	20426	7673	7673	7673	N1	1289	104	2		wild_type	ERR16083508		This study
S. enterica	Napoli	201707408		2017	France	France	Bretagne	35	35430	FRH03		Human	Stool	8	19	Male	< 1		SAL_SA4176AA	SAL_DB8759AA_AS	5172	60	161	147	96	1086	155	12	142	140682	140682	140682	140682	140682	140682	140682	140682	140682	1543	1543a	N2	1289	104	2		wild_type	ERR16083512		This study
S. enterica	Napoli	201708199		2017	France	France	Auvergne_Rhône-Alpes	69	69400	FRK26		Human	Stool	8	24	Male	< 1		SAL_SA4177AA	SAL_DB8760AA_AS	5168	60	161	147	96	1085	155	12	142	140684	140684	140684	140684	140684	140684	140575	140575	140575	1543	1543a	N2	1289	104	2		wild_type	ERR16083514		This study
S. enterica	Napoli	201708811	Nap17-8811	2017	France	France	Pays-de-la-Loire	85		FRG05		Food	Vegetable						SAL_BB1114AA	SAL_VB3860AA_AS	474	60	161	147	96	178	155	12	142	214083	214083	214083	204722	140749	130700	27729	27729	27729	1543	1543a	N2	1289	104	2		wild_type	ERR16083420		This study
S. enterica	Napoli	201709893		2017	France	France	Normandie	76	76031 (LAM)	FRD22		Human	Blood	9	29	Female	83	Isolated	SAL_SA4163AA	SAL_DB8698AA_AS	5170	60	161	781	96	178	155	12	142	140673	140673	140673	140673	140673	140673	140673	140623	27729	1543	1543a	N2	1289	104	2		wild_type	ERR16083523		This study
S. enterica	Napoli	201710675		2017	France	France	Nouvelle-Aquitaine	17	17670	FRI32		Human	Stool	10	23	Female	80		SAL_SA4165AA	SAL_DB8700AA_AS	5170	60	161	781	96	178	155	12	142	140675	140675	140675	140675	140675	140675	140673	140623	27729	1543	1543a	N2	1289	104	2		wild_type	ERR16083524		This study
S. enterica	Napoli	17-33382_S29		2017	Italy	Italy	Piemonte			ITC1		Human	Stool						SAL_NA7881AA	SAL_YA5974AA_AS	474	60	161	147	96	178	155	12	142	107147	107147	107147	107147	107147	107089	97218	24950	1543	1543	1543b	N2	1289	104	2		wild_type	ERR2194387		Mastrorilli et al 2020
S. enterica	Napoli	ISS_3/13/18	Nap3-13-18	2017	Italy	Italy	Lazio			ITI4		Human	Stool						SAL_ZA7004AA	SAL_SB4346AA_AS	1853	60	161	163	338	178	155	12	142	205105	205105	205105	205105	205105	106990	106990	106990	106990	20879	20879	N2	1289	104	2		wild_type	ERR16071748		This study
S. enterica	Napoli	ISS_38/12/17	Nap38-12-17	2017	Italy	Italy	Campania			ITF3		Human	Stool						SAL_ZA6881AA	SAL_SB4209AA_AS	2095	60	161	147	151	178	155	12	142	204980	204980	204980	204980	204980	107014	107014	107014	1450	1450	1450	N1	1289	104	2		wild_type	ERR16071749		This study
S. enterica	Napoli	ISS_40/7/17	Nap40-7-17	2017	Italy	Italy	Lazio			ITI4		Human	Urine						SAL_ZA6887AA	SAL_SB4215AA_AS	2095	60	161	147	151	178	155	12	142	204989	204989	204989	204989	204989	204989	204989	204989	1450	1450	1450	N1	1289	104	2		wild_type	ERR16071753		This study
S. enterica	Napoli	ISS_40/8/17	Nap40-8-17	2017	Italy	Italy	Lazio			ITI4		Human	Stool						SAL_ZA6889AA	SAL_SB4217AA_AS	2095	60	161	147	151	178	155	12	142	204995	204995	204995	204995	204995	107096	107096	107096	107096	1450	1450	N1	1289	104	2		wild_type	ERR16071754		This study
S. enterica	Napoli	ISS_40/9/17	Nap40-9-17	2017	Italy	Italy	Lazio			ITI4		Human	Stool						SAL_ZA6888AA	SAL_SB4216AA_AS	2095	60	161	147	151	178	155	12	142	204990	204990	204990	204990	204990	204989	204989	204989	1450	1450	1450	N1	1289	104	2		wild_type	ERR16071755		This study
S. enterica	Napoli	ISS_49/6/17	Nap49-6-17	2017	Italy	Italy	Lazio			ITI4		Human	Stool						SAL_ZA6891AA	SAL_SB4219AA_AS	1637	60	161	163	96	178	155	12	142	204992	204992	204992	204992	204992	204992	204992	204992	204992	20879	20879	N2	1289	104	2		wild_type	ERR16071766		This study
S. enterica	Napoli	ISS_49/7/17	Nap49-7-17	2017	Italy	Italy	Lazio			ITI4		Human	Stool						SAL_ZA6892AA	SAL_SB4220AA_AS	2095	60	161	147	151	178	155	12	142	204996	204996	204996	204996	26646	1450	1450	1450	1450	1450	1450	N1	1289	104	2		wild_type	ERR16071767		This study
S. enterica	Napoli	ISS_53/37/17	Nap53-37-17	2017	Italy	Italy	Lazio			ITI4		Human	Stool						SAL_ZA6902AA	SAL_SB4230AA_AS	-1048	60	161	147	151	-2	155	12	142	205004	205004	205004	205004	205004	107049	107049	107049	1450	1450	1450	N1	1289	104	2		wild_type	ERR16071770		This study
S. enterica	Napoli	ISS_53/38/17	Nap53-38-17	2017	Italy	Italy	Lazio			ITI4		Human	Stool						SAL_ZA6903AA	SAL_SB4231AA_AS	474	60	161	147	96	178	155	12	142	205001	205001	205001	205001	205001	107128	97218	24950	1543	1543	1543b	N2	1289	104	2		wild_type	ERR16071771		This study
S. enterica	Napoli	ISS_53/40/17	Nap53-40-17	2017	Italy	Italy	Lazio			ITI4		Human	Stool						SAL_ZA6904AA	SAL_SB4241AA_AS	474	60	161	147	96	178	155	12	142	205008	205008	205008	205008	205008	205008	97218	24950	1543	1543	1543b	N2	1289	104	2		wild_type	ERR16071772		This study
S. enterica	Napoli	ISS_53/41/17	Nap53-41-17	2017	Italy	Italy	Lazio			ITI4		Human							SAL_ZA6905AA	SAL_SB4247AA_AS	1637	60	161	163	96	178	155	12	142	205002	205002	205002	204992	204992	204992	204992	204992	204992	20879	20879	N2	1289	104	2		wild_type	ERR16071773		This study
S. enterica	Napoli	ISS_53/42/17	Nap53-42-17	2017	Italy	Italy	Lazio			ITI4		Human	Stool						SAL_ZA6906AA	SAL_SB4248AA_AS	2019	60	161	147	348	178	155	12	142	205009	205009	205009	205009	20426	20426	20426	20426	7673	7673	7673	N1	1289	104	2		wild_type	ERR16071774		This study
S. enterica	Napoli	ISS_53/43/17	Nap53-43-17	2017	Italy	Italy	Lazio			ITI4		Human	Stool						SAL_ZA6907AA	SAL_SB4249AA_AS	2095	60	161	147	151	178	155	12	142	205010	205010	205010	205010	26646	1450	1450	1450	1450	1450	1450	N1	1289	104	2		wild_type	ERR16071775		This study
S. enterica	Napoli	ISS_61/1/17	Nap61-1-17	2017	Italy	Italy	Lazio			ITI4		Human	Stool						SAL_ZA6916AA	SAL_SB4258AA_AS	2095	60	161	147	151	178	155	12	142	205020	205020	205020	205019	205019	205019	1748	1748	1450	1450	1450	N1	1289	104	2		wild_type	ERR16071784		This study
S. enterica	Napoli	ISS_61/2/17	Nap61-2-17	2017	Italy		Lazio			ITI4		Human	Stool						SAL_ZA6917AA	SAL_SB4259AA_AS	4372	60	161	147	96	178	774	12	142	205018	205018	205018	205018	205018	94666	94666	94666	94666	94666	94666	N2	1289	104	2		wild_type	ERR16071785	CP163480,CP163481	This study
S. enterica	Napoli	ISS_61/3/17	Nap61-3-17	2017	Italy	Italy	Lazio			ITI4		Human							SAL_ZA6918AA	SAL_SB4260AA_AS	2095	60	161	147	151	178	155	12	142	205019	205019	205019	205019	205019	205019	1748	1748	1450	1450	1450	N1	1289	104	2		wild_type	ERR16071786		This study
S. enterica	Napoli	ISS_61/4/17	Nap61-4-17	2017	Italy		Lazio			ITI4		Human	Stool						SAL_ZA6919AA	SAL_SB4261AA_AS	4354	60	161	685	151	178	155	12	142	205024	205024	205024	205024	205024	205024	205024	94001	94001	94001	94001	N1	1289	104	2		wild_type	ERR16071787	CP163482	This study
S. enterica	Napoli	ISS_63/22/17	Nap63-22-17	2017	Italy	Italy	Campania			ITF3		Human	Stool						SAL_ZA6921AA	SAL_SB4263AA_AS	2019	60	161	147	348	178	155	12	142	205023	205023	205023	205023	205023	205023	25097	25097	7673	7673	7673	N1	1289	104	2		wild_type	ERR16071789		This study
S. enterica	Napoli	ISS_63/24/17	Nap63-24-17	2017	Italy	Italy	Campania			ITF3		Human	Stool						SAL_ZA6923AA	SAL_SB4265AA_AS	2019	60	161	147	348	178	155	12	142	205026	205026	205026	205026	205026	205026	205026	7673	7673	7673	7673	N1	1289	104	2		wild_type	ERR16071790		This study
S. enterica	Napoli	ISS_75/1/18	Nap75-1-18	2017	Italy	Italy	Lombardia			ITC4		Human	Stool						SAL_ZA6944AA	SAL_SB4286AA_AS	474	60	161	147	96	178	155	12	142	205047	205047	205047	205047	205047	205047	205047	24950	1543	1543	1543b	N2	1289	104	2		wild_type	ERR16071811		This study
S. enterica	Napoli	ISS_75/3/18	Nap75-3-18	2017	Italy	Italy	Lombardia			ITC4		Human	Blood						SAL_ZA6943AA	SAL_SB4285AA_AS	474	60	161	147	96	178	155	12	142	205046	205046	205046	205046	205046	107128	97218	24950	1543	1543	1543b	N2	1289	104	2		wild_type	ERR16071812		This study
S. enterica	Napoli	ISS_75/4/18	Nap75-4-18	2017	Italy	Italy	Lombardia			ITC4		Human	Stool						SAL_ZA6945AA	SAL_SB4287AA_AS	474	60	161	147	96	178	155	12	142	205048	205048	205048	205048	205048	1543	1543	1543	1543	1543	1543b	N2	1289	104	2		wild_type	ERR16071813	CP163493-CP163494-CP163495	This study
S. enterica	Napoli	ISS_75/6/18	Nap75-6-18	2017	Italy	Italy	Lombardia			ITC4		Human	Blood						SAL_ZA6946AA	SAL_SB4288AA_AS	474	60	161	147	96	178	155	12	142	205049	205049	205049	205049	205049	137353	137334	24950	1543	1543	1543b	N2	1289	104	2		wild_type	ERR16071814		This study
S. enterica	Napoli	ISS_75/8/18	Nap75-8-18	2017	Italy	Italy	Lombardia			ITC4		Human	Stool						SAL_ZA6947AA	SAL_SB4289AA_AS	474	60	161	147	96	178	155	12	142	205051	205051	205051	205051	205051	24950	24950	24950	1543	1543	1543b	N2	1289	104	2		wild_type	ERR16071815		This study
S. enterica	Napoli	ISS_75/9/18	Nap75-9-18	2017	Italy	Italy	Lombardia			ITC4		Human	Stool						SAL_ZA6948AA	SAL_SB4290AA_AS	1637	60	161	163	96	178	155	12	142	205050	205050	205050	205050	205050	205050	204992	204992	204992	20879	20879	N2	1289	104	2		wild_type	ERR16071816		This study
S. enterica	Napoli	ISS_83/56/17	Nap83-56-17	2017	Italy	Italy	Trentino_Alto_Adige_region	Trento_province		ITH2		Human	Stool						SAL_ZA6958AA	SAL_SB4300AA_AS	2101	60	495	147	348	178	155	436	142	205060	205060	205060	205060	127793	20403	20403	7673	7673	7673	7673	N1	1289	104	2	blaTEM-135	wild_type	ERR16071827		This study
S. enterica	Napoli	ISS_84/27/17	Nap84-27-17	2017	Italy	Italy	Lazio			ITI4		Human							SAL_ZA6959AA	SAL_SB4301AA_AS	1853	60	161	163	338	178	155	12	142	205062	205062	205062	205062	205062	205062	205062	205058	106990	20879	20879	N2	1289	104	2		wild_type	ERR16071828		This study
S. enterica	Napoli	ISS_84/28/17	Nap84-28-17	2017	Italy	Italy	Lazio			ITI4		Human	Stool						SAL_ZA6961AA	SAL_SB4303AA_AS	1637	60	161	163	96	178	155	12	142	205064	205064	205064	205064	205064	204992	204992	204992	204992	20879	20879	N2	1289	104	2		wild_type	ERR16071829		This study
S. enterica	Napoli	LC0541/17		2017	Italy	Italy	Lombardia	Lecco		ITC4		Human	Stool	7		Female	1	Isolated	SAL_RA9865AA	SAL_HC5185AA_AS	474	60	161	147	96	178	155	12	142	232154	232154	232154	156224	156224	156224	156224	156224	156224	1543	1543b	N2	1289	104	2	blaCTX-M-1	wild_type	SRR7646078		Clément et al 2018
S. enterica	Napoli	2018LSAL02989		2018	France	France	Pays-de-la-Loire	49		FRG02		Environment	Poultry_duck	5	28				SAL_IB5757AA	SAL_QC4045AA_AS	474	60	161	147	96	178	155	12	142	276328	276328	276328	140634	124002	124002	27729	27729	27729	1543	1543a	N2	1289	104	2		wild_type	ERR16094183		This study
S. enterica	Napoli	20182816	S20182816	2018	Spain	Spain	Asturias	Asturias		ES120		Human	Stool	7	11	Male	54	Isolated	SAL_QB6842AA	SAL_ZC6767AA_AS	474	60	161	147	96	178	155	12	142	346049	346049	346049	346049	346049	343813	343813	343813	343813	1543	1543c	N2	1289	104	2		wild_type	ERR16088482		This study
S. enterica	Napoli	20183384	S20183384	2018	Spain	Switzerland	Pais vasco	Alava		ES211		Human	Stool	9	4	Male	10	Isolated	SAL_QB5601AA	SAL_ZC5492AA_AS	474	60	161	147	96	178	155	12	142	344892	344892	344892	344892	258818	24950	24950	24950	1543	1543	1543b	N2	1289	104	2		wild_type	ERR16088483		This study
S. enterica	Napoli	20183725	S20183725	2018	Spain	Italy	Valencia	Castellon		ES522		Human	Stool	11	24	Female	68		SAL_QB5599AA	SAL_ZC5490AA_AS	2008	60	161	147	348	178	155	436	142	344884	344884	344884	106985	25000	20403	20403	7673	7673	7673	7673	N1	1289	104	2		wild_type	ERR16088484		This study
S. enterica	Napoli	UZH_N18-0704	NapN18-704	2018	Switzerland	Switzerland	Nordwestschweiz	NW	4402	CH03		Human	Urine						SAL_ZA6853AA	SAL_SB3485AA_AS	474	60	161	147	96	178	155	12	142	204958	204958	204958	204899	140601	107128	97218	24950	1543	1543	1543b	N2	1289	104	2		wild_type	ERR16062669		This study
S. enterica	Napoli	UZH_N18-0750	NapN18-750	2018	Switzerland	Switzerland	Tessin	TE	6500	CH07		Human	Stool						SAL_ZA6854AA	SAL_SB3486AA_AS	474	60	161	147	96	178	155	12	142	204955	204955	204955	204955	204955	204886	204886	24950	1543	1543	1543b	N2	1289	104	2		wild_type	ERR16062670		This study
S. enterica	Napoli	UZH_N18-0980	NapN18-980	2018	Switzerland	Switzerland	Nordwestschweiz	NW	4057	CH03		Human	Stool						SAL_ZA6855AA	SAL_SB3487AA_AS	474	60	161	147	96	178	155	12	142	204960	204960	204960	140601	140601	107128	97218	24950	1543	1543	1543b	N2	1289	104	2		wild_type	ERR16062671		This study
S. enterica	Napoli	UZH_N18-1164	NapN18-1164	2018	Switzerland	Switzerland	Nordwestschweiz	NW	4410	CH03		Human	Stool						SAL_ZA6856AA	SAL_SB3488AA_AS	474	60	161	147	96	178	155	12	142	204956	204956	204909	204899	140601	107128	97218	24950	1543	1543	1543b	N2	1289	104	2		wild_type	ERR16062672		This study
S. enterica	Napoli	UZH_N18-1411	NapN18-1411	2018	Switzerland	Switzerland	Tessin	TE	6982	CH07		Human	Stool						SAL_ZA6857AA	SAL_SB3503AA_AS	474	60	161	147	96	178	155	12	142	204957	204957	204957	204915	204915	24950	24950	24950	1543	1543	1543b	N2	1289	104	2		wild_type	ERR16062673		This study
S. enterica	Napoli	UZH_N18-1464	NapN18-1464	2018	Switzerland	Switzerland	Zürich	ZH	8707	CH04		Human	Blood						SAL_ZA6859AA	SAL_SB3505AA_AS	474	60	161	147	96	178	155	12	142	204962	204962	204909	204899	140601	107128	97218	24950	1543	1543	1543b	N2	1289	104	2		wild_type	ERR16062674		This study
S. enterica	Napoli	UZH_N18-1586	NapN18-1586	2018	Switzerland	Switzerland	Genferseeregion	GE	1009	CH01		Human	Stool						SAL_ZA6858AA	SAL_SB3504AA_AS	474	60	161	147	96	178	155	12	142	204961	204961	204961	204961	107028	107028	26263	24950	1543	1543	1543b	N2	1289	104	2		wild_type	ERR16062675		This study
S. enterica	Napoli	UZH_N18-1622	NapN18-1622	2018	Switzerland	Switzerland	Nordwestschweiz	NW	4059	CH03		Human	Urine						SAL_ZA6765AA	SAL_SB3243AA_AS	474	60	161	147	96	178	155	12	142	204868	204868	204868	204868	204868	204868	97218	24950	1543	1543	1543b	N2	1289	104	2		wild_type	ERR16062676		This study
S. enterica	Napoli	UZH_N18-1791	NapN18-1791	2018	Switzerland	Switzerland	Zürich	ZH	8953	CH04		Human	Stool						SAL_ZA6767AA	SAL_SB3245AA_AS	474	60	161	147	96	178	155	12	142	204869	204869	204869	204869	204869	137329	97218	24950	1543	1543	1543b	N2	1289	104	2		wild_type	ERR16062677		This study
S. enterica	Napoli	UZH_N18-1966	NapN18-1966	2018	Switzerland	Switzerland	Zürich	ZH	8104	CH04		Human	Blood						SAL_ZA6766AA	SAL_SB3244AA_AS	474	60	161	147	96	178	155	12	142	204870	204870	204870	204870	140601	107128	97218	24950	1543	1543	1543b	N2	1289	104	2		wild_type	ERR16062678		This study
S. enterica	Napoli	UZH_N18-2149	NapN18-2149	2018	Switzerland	Switzerland	Nordwestschweiz	NW	4452	CH03		Human	Stool						SAL_ZA6768AA	SAL_SB3246AA_AS	474	60	161	147	96	178	155	12	142	204871	204871	204871	204871	204871	204871	107093	24950	1543	1543	1543b	N2	1289	104	2		wild_type	ERR16062679		This study
S. enterica	Napoli	UZH_N18-2469	NapN18-2469	2018	Switzerland	Switzerland	Nordwestschweiz	NW	4153	CH03		Human	Stool						SAL_ZA6769AA	SAL_SB3247AA_AS	474	60	161	147	96	178	155	12	142	204872	204872	204872	204872	204872	107128	97218	24950	1543	1543	1543b	N2	1289	104	2		wild_type	ERR16062680		This study
S. enterica	Napoli	201802838		2018	France	France	Nouvelle-Aquitaine	33	33370	FRI12	No Travel declared	Human	Stool	4	24	Female	1	School	SAL_SA4161AA	SAL_DB8696AA_AS	5168	60	161	147	96	1085	155	12	142	140669	140669	140669	140669	140669	140669	140575	140575	140575	1543	1543a	N2	1289	104	2		wild_type	ERR16083531		This study
S. enterica	Napoli	201804111		2018	France	France	Nouvelle-Aquitaine	40	40100 (LAM)	FRI13		Human	Stool	6	13	Female	< 1	Collective food poisoning	SAL_SA4152AA	SAL_DB8686AA_AS	5168	60	161	147	96	1085	155	12	142	140658	140658	140658	140658	140658	140575	140575	140575	140575	1543	1543a	N2	1289	104	2		wild_type	ERR16083536		This study
S. enterica	Napoli	201804131		2018	France	France	Nouvelle-Aquitaine	16	16270	FRI31		Human	Stool	6	12	Male	69	Isolated	SAL_SA4145AA	SAL_DB8680AA_AS	474	60	161	147	96	178	155	12	142	140653	140653	140653	140653	140653	140653	27733	27733	27729	1543	1543a	N2	1289	104	2		wild_type	ERR16083539		This study
S. enterica	Napoli	201804194		2018	France	France	Nouvelle-Aquitaine	17	17220	FRI32		Human	Stool	6	16	Female	65	Isolated	SAL_SA4144AA	SAL_DB8679AA_AS	5170	60	161	781	96	178	155	12	142	140660	140660	140660	140660	140660	140660	140623	140623	27729	1543	1543a	N2	1289	104	2		wild_type	ERR16083541		This study
S. enterica	Napoli	201804987		2018	France	France	Pays-de-la-Loire	44	44340	FRG01	No Travel declared	Human	Stool	6	27	Male	84	Isolated	SAL_SA4118AA	SAL_DB8653AA_AS	4997	60	161	757	96	178	155	12	142	140631	130700	130700	130700	130700	130700	27729	27729	27729	1543	1543a	N2	1289	104	2		wild_type	ERR16083566		This study
S. enterica	Napoli	201805234		2018	France	France	Bourgogne_Franche-Comté	71	71570	FRC13		Human	Stool	7	18	Male	4	Isolated	SAL_SA4111AA	SAL_DB8646AA_AS	5170	60	161	781	96	178	155	12	142	140625	140623	140623	140623	140623	140623	140623	140623	27729	1543	1543a	N2	1289	104	2		wild_type	ERR16083572		This study
S. enterica	Napoli	201806280		2018	France	France	Occitanie	31	31380	FRJ23	No Travel declared	Human	Stool	8	14	Male	1	Isolated	SAL_SA4074AA	SAL_DB8609AA_AS	5168	60	161	147	96	1085	155	12	142	140590	140590	140590	140590	140590	140575	140575	140575	140575	1543	1543a	N2	1289	104	2		wild_type	ERR16083604		This study
S. enterica	Napoli	201806394		2018	France	France	Pays-de-la-Loire	49	49410	FRG02		Human	Stool	8	10	Male	1	Isolated	SAL_SA4077AA	SAL_DB8612AA_AS	474	60	161	147	96	178	155	12	142	140592	140592	140592	140592	140592	140592	140587	27729	27729	1543	1543a	N2	1289	104	2		wild_type	ERR16083606		This study
S. enterica	Napoli	201807311	ISS_Salm201807311	2018	France	Italy	Ile-de-France	75			Travel_to_Italy (31/07_to_15/08)	Human	Stool	8	29	Female	16		SAL_VA0655AA	SAL_IB7072AA_AS	5140	60	161	147	96	178	155	814	142	165897	165897	165897	165897	106989	24950	24950	24950	1543	1543	1543b	N2	1289	104	2		wild_type	ERR16083624		This study
S. enterica	Napoli	201807514		2018	France	France	Centre_Val-de-Loire	36	36000	FRB03		Human	Stool	09	3	Female	68	Isolated	SAL_ZA6757AA	SAL_SB3142AA_AS	5168	60	161	147	96	1085	155	12	142	204857	204857	204857	204857	204857	204857	140579	140575	140575	1543	1543a	N2	1289	104	2		wild_type	ERR16083627		This study
S. enterica	Napoli	201808455		2018	France	Italy	Provence-Alpes-Cote-dAzur	06		FRL03		Human	Stool	09	21	Male	20		SAL_ZA6740AA	SAL_SB3112AA_AS	2008	60	161	147	348	178	155	436	142	204839	204839	204839	204839	204839	7814	7673	7673	7673	7673	7673	N1	1289	104	2		wild_type	ERR16083643		This study
S. enterica	Napoli	201808809		2018	France	France	Occitanie	34	34980	FRJ13		Human	Stool	09	26	Male	2	Isolated	SAL_ZA6736AA	SAL_SB3108AA_AS	5168	60	161	147	96	1085	155	12	142	204840	140684	140684	140684	140684	140684	140575	140575	140575	1543	1543a	N2	1289	104	2		wild_type	ERR16083647		This study
S. enterica	Napoli	201809487		2018	France	France	Ile-de-France	92		FR105		Human	Stool	07	26	Female	48		SAL_ZA6686AA	SAL_SB3045AA_AS	5170	60	161	781	96	178	155	12	142	204788	204788	204788	204788	204669	204669	140673	140623	27729	1543	1543a	N2	1289	104	2		wild_type	ERR16083656		This study
S. enterica	Napoli	201809658		2018	France	France	Pays-de-la-Loire	85	85220	FRG05		Human	Stool	10	17	Female	82	Isolated	SAL_ZA6641AA	SAL_SB3000AA_AS	474	60	161	147	96	178	155	12	142	204744	140760	140760	140760	140760	140760	140587	27729	27729	1543	1543a	N2	1289	104	2		wild_type	ERR16083658		This study
S. enterica	Napoli	201810062		2018	France	France	Nouvelle-Aquitaine	17	17290	FRI32		Human	Stool	11	4	Male	47		SAL_ZA6635AA	SAL_SB2981AA_AS	5170	60	161	781	96	178	155	12	142	204739	204739	204739	204739	204739	204739	140673	140623	27729	1543	1543a	N2	1289	104	2		wild_type	ERR16083665		This study
S. enterica	Napoli	201810642		2018	France	France	Centre_Val-de-Loire	36	36700	FRB03		Human	Stool	11	18	Male	5	School	SAL_VA0696AA	SAL_IB7114AA_AS	5168	60	161	147	96	1085	155	12	142	165969	165969	165969	165969	165969	165969	140579	140575	140575	1543	1543a	N2	1289	104	2		wild_type	ERR16083668		This study
S. enterica	Napoli	201810932		2018	France	France	Centre_Val-de-Loire	36	36700	FRB03		Human	Stool	11	29	Male	3	School	SAL_ZA6628AA	SAL_SB2974AA_AS	5168	60	161	147	96	1085	155	12	142	204732	165969	165969	165969	165969	165969	140579	140575	140575	1543	1543a	N2	1289	104	2		wild_type	ERR16083672		This study
S. enterica	Napoli	201811078		2018	France	France	Centre_Val-de-Loire	36	36700	FRB03		Human	Stool	12	7	Male	3	Family	SAL_VA0705AA	SAL_IB7123AA_AS	5168	60	161	147	96	1085	155	12	142	165980	165969	165969	165969	165969	165969	140579	140575	140575	1543	1543a	N2	1289	104	2		wild_type	ERR16083674		This study
S. enterica	Napoli	ISS_11/03/19	Nap11-3-19	2018	Italy	Italy	Lazio			ITI4		Human							SAL_ZA6865AA	SAL_SB4193AA_AS	474	60	161	147	96	178	155	12	142	204964	204964	204964	204964	204964	204964	204964	24950	1543	1543	1543b	N2	1289	104	2		wild_type	ERR16071720		This study
S. enterica	Napoli	ISS_11/04/19	Nap11-4-19	2018	Italy	Italy	Lazio			ITI4		Human	Stool						SAL_ZA6866AA	SAL_SB4194AA_AS	474	60	161	147	96	178	155	12	142	204978	204978	204978	204978	204978	204906	107035	24950	1543	1543	1543b	N2	1289	104	2		wild_type	ERR16071721		This study
S. enterica	Napoli	ISS_45/26/18	Nap45-26-18	2018	Italy	Italy	Piemonte			ITC1		Human	Stool						SAL_ZA6890AA	SAL_SB4218AA_AS	474	60	161	147	96	178	155	12	142	204991	204991	204991	204991	204991	204991	107035	24950	1543	1543	1543b	N2	1289	104	2		wild_type	ERR16071757		This study
S. enterica	Napoli	ISS_58/16/18	Nap58-16-18	2018	Italy	Italy	Lazio			ITI4		Human	Urine						SAL_ZA6912AA	SAL_SB4254AA_AS	2019	60	161	147	348	178	155	12	142	205016	205016	205016	205016	205016	20425	20425	7673	7673	7673	7673	N1	1289	104	2		wild_type	ERR16071780		This study
S. enterica	Napoli	ISS_60/4/18	Nap60-4-18	2018	Italy	Italy	Lazio			ITI4		Human	Stool						SAL_ZA6913AA	SAL_SB4255AA_AS	2095	60	161	147	151	178	155	12	142	205013	205013	205013	205013	205013	205013	204989	204989	1450	1450	1450	N1	1289	104	2		wild_type	ERR16071783		This study
S. enterica	Napoli	ISS_64/1/18	Nap64-1-18	2018	Italy	Italy	Lazio			ITI4		Human	Stool						SAL_ZA6924AA	SAL_SB4266AA_AS	1853	60	161	163	338	178	155	12	142	205027	205027	205027	205027	205027	205027	205027	106990	106990	20879	20879	N2	1289	104	2		wild_type	ERR16071792		This study
S. enterica	Napoli	ISS_68/28/18	Nap68-28-18	2018	Italy	Italy	Piemonte			ITC1		Human	Stool						SAL_ZA6938AA	SAL_SB4280AA_AS	474	60	161	147	96	178	155	12	142	205037	205037	205037	205037	205037	205037	107035	24950	1543	1543	1543b	N2	1289	104	2		wild_type	ERR16071805		This study
S. enterica	Napoli	ISS_68/34/18	Nap68-34-18	2018	Italy	Italy	Liguria			ITC3		Environment	Water-surface						SAL_ZA6939AA	SAL_SB4281AA_AS	474	60	161	147	96	178	155	12	142	205041	205041	205041	205041	205041	107035	107035	24950	1543	1543	1543b	N2	1289	104	2		wild_type	ERR16071806		This study
S. enterica	Napoli	ISS_75/22/18	Nap73-22-18	2018	Italy	Italy	Lombardia			ITC4		Human							SAL_ZA6940AA	SAL_SB4282AA_AS	474	60	161	147	96	178	155	12	142	205042	205042	205042	205042	205042	205042	137334	24950	1543	1543	1543b	N2	1289	104	2		wild_type	ERR16071809		This study
S. enterica	Napoli	ISS_93/6/18	Nap93-6-18	2018	Italy	Italy	Piemonte			ITC1		Environment							SAL_ZA6977AA	SAL_SB4319AA_AS	474	60	161	147	96	178	155	12	142	205078	205078	205078	205078	205078	101509	26263	24950	1543	1543	1543b	N2	1289	104	2		wild_type	ERR16071842		This study
S. enterica	Napoli	2019LSAL00617		2019	France	France	Bretagne	56		FRH04		Food	Barley_Animal_feed	2	7				SAL_IB5758AA	SAL_QC4046AA_AS	474	60	161	147	96	178	155	12	142	276338	276338	276338	276338	124002	124002	27729	27729	27729	1543	1543a	N2	1289	104	2		wild_type	ERR16094184		This study
S. enterica	Napoli	2019LSAL00717		2019	France	France	Nouvelle-Aquitaine	19		FRI21		Environment	Water-River	3	4				SAL_IB5759AA	SAL_QC4047AA_AS	474	60	161	147	96	178	155	12	142	276339	276339	276339	276339	276339	232436	140588	140588	140575	1543	1543a	N2	1289	104	2		wild_type	ERR16094185		This study
S. enterica	Napoli	2019LSAL01659		2019	France	France	Pays-de-la-Loire	85	85600 (product transformation location)	FRG05		Food	lettuce	6	13				SAL_IB5754AA	SAL_QC4042AA_AS	474	60	161	147	96	178	155	12	142	276327	276327	276327	214086	124002	124002	27729	27729	27729	1543	1543a	N2	1289	104	2		wild_type	ERR16094186		This study
S. enterica	Napoli	2019LSAL01950		2019	France	France	Nouvelle-Aquitaine	79	79700	FRI33		Environment	Poultry_quail	7	2				SAL_IB5790AA	SAL_QC4078AA_AS	474	60	161	147	96	178	155	12	142	276375	276375	276375	276375	276375	140597	27729	27729	27729	1543	1543a	N2	1289	104	2		wild_type	ERR16094188		This study
S. enterica	Napoli	2019LSAL02096		2019	France	France	Pays-de-la-Loire	85	85600 (product transformation location)	FRG05		Food	lettuce_Valerianella-locusta	7	15				SAL_IB5792AA	SAL_QC4080AA_AS	474	60	161	147	96	178	155	12	142	276360	276360	276360	276360	263721	140597	27729	27729	27729	1543	1543a	N2	1289	104	2		wild_type	ERR16094189		This study
S. enterica	Napoli	2019LSAL02107		2019	France	France	Pays-de-la-Loire	44		FRG01		Food	lettuce	7	10				SAL_IB5795AA	SAL_QC4083AA_AS	474	60	161	147	96	178	155	12	142	276359	276359	276359	276359	276359	216287	27729	27729	27729	1543	1543a	N2	1289	104	2		wild_type	ERR16094190		This study
S. enterica	Napoli	2019LSAL02199		2019	France	France	Pays-de-la-Loire	85	85600 (product transformation location)	FRG05		Food	lettuce_Valerianella-locusta	7	29				SAL_IB5794AA	SAL_QC4082AA_AS	474	60	161	147	96	178	155	12	142	276376	276376	276376	276376	124002	124002	27729	27729	27729	1543	1543a	N2	1289	104	2		wild_type	ERR16094191		This study
S. enterica	Napoli	2019LSAL02412		2019	France	France	Nouvelle-Aquitaine	16		FRI31		Environment	Poultry_Gallus gallus	8	6				SAL_IB5779AA	SAL_QC4067AA_AS	474	60	161	147	96	178	155	12	142	276395	276395	276395	276395	276395	140653	27733	27733	27729	1543	1543a	N2	1289	104	2		wild_type	ERR16094192		This study
S. enterica	Napoli	2019LSAL03782		2019	France	France	Occitanie	12	12500	FRJ22		Environment	Water-River	8	7				SAL_IB5780AA	SAL_QC4068AA_AS	474	60	161	147	96	178	155	12	142	276396	276396	276396	276396	276396	204666	140588	140588	140575	1543	1543a	N2	1289	104	2		wild_type	ERR16094193		This study
S. enterica	Napoli	2019LSAL03801		2019	France	France	Nouvelle-Aquitaine	24	24370	FRI11		Environment	Poultry_goose	8	12				SAL_IB5784AA	SAL_QC4072AA_AS	474	60	161	147	96	178	155	12	142	276357	276357	276357	276357	276357	276357	27733	27733	27729	1543	1543a	N2	1289	104	2	aadA1,aadA2,sul3,tet(A),cmlA1	wild_type	ERR16094194		This study
S. enterica	Napoli	2019LSAL03864		2019	France	France	Centre_Val-de-Loire	36		FRB03		Environment	Poultry_broiler_Gallus gallus	9	16				SAL_IB5786AA	SAL_QC4074AA_AS	474	60	161	147	96	178	155	12	142	276358	276358	276358	276358	204714	140611	27729	27729	27729	1543	1543a	N2	1289	104	2		wild_type	ERR16094195		This study
S. enterica	Napoli	2019LSAL04029		2019	France	France	Auvergne_Rhône-Alpes	01		FRK21		Environment	Poultry_broiler_Gallus gallus	9	4				SAL_IB5785AA	SAL_QC4073AA_AS	474	60	161	147	96	178	155	12	142	276356	276356	276356	276356	276356	204710	140588	140588	140575	1543	1543a	N2	1289	104	2		wild_type	ERR16094196		This study
S. enterica	Napoli	2019LSAL04285		2019	France	France	Nouvelle-Aquitaine	40	40000 (slaughterhouse)	FRI13		Food	Bovine	10	8				SAL_IB5850AA	SAL_QC4138AA_AS	8535	60	161	147	96	178	155	12	1363	276414	276414	276414	276414	264040	140597	27729	27729	27729	1543	1543a	N2	1289	104	2		wild_type	ERR16094197		This study
S. enterica	Napoli	2019LSAL01876		2019	France	France	Pays-de-la-Loire	85	85600 (product transformation location)	FRG05		Food	lettuce_Valerianella-locusta	6	28				SAL_IB5755AA	SAL_QC4043AA_AS	474	60	161	147	96	178	155	12	142	276337	276337	276337	276337	263721	140597	27729	27729	27729	1543	1543a	N2	1289	104	2		wild_type	ERR16094187		This study
S. enterica	Napoli	20191428	S20191428	2019	Spain	Spain	Cantabria	Cantabria		ES130		Animal	Bivalve_wild_Raw_clams	7	1				SAL_QB6835AA	SAL_ZC6760AA_AS	474	60	161	147	96	178	155	12	142	346050	346050	346050	346050	346050	346050	346050	344463	343813	1543	1543c	N2	1289	104	2		wild_type	ERR16088485		This study
S. enterica	Napoli	20191429	S20191429	2019	Spain	Spain	Cantabria	Cantabria		ES130		Animal	Bivalve_wild_Raw_clams	7	1				SAL_QB7250AA	SAL_ZC7156AA_AS	474	60	161	147	96	178	155	12	142	346364	346050	346050	346050	346050	346050	346050	344463	343813	1543	1543c	N2	1289	104	2		wild_type	ERR16088486		This study
S. enterica	Napoli	20193375	S20193375	2019	Spain	Spain	Asturias	Asturias		ES120		Human	Stool	9	23	Male	78	Isolated	SAL_QB6830AA	SAL_ZC6755AA_AS	474	60	161	147	96	178	155	12	142	346058	346058	346058	346058	343816	343813	343813	343813	343813	1543	1543c	N2	1289	104	2		wild_type	ERR16088487		This study
S. enterica	Napoli	20193397	S20193397	2019	Spain	Spain	Asturias	Asturias		ES120		Human	Stool	8	21	Female	0	Isolated	SAL_QB6837AA	SAL_ZC6762AA_AS	474	60	161	147	96	178	155	12	142	346052	346052	346052	346052	346052	346052	344480	343813	343813	1543	1543c	N2	1289	104	2		wild_type	ERR16088488		This study
S. enterica	Napoli	UZH_N19-1047	NapN19-1047	2019	Switzerland	Switzerland	Zürich	ZH	8802	CH04		Human	Stool						SAL_EB9830AA	SAL_LC3745AA_AS	474	60	161	147	96	178	155	12	142	205104	205104	205104	205104	205104	205104	97218	24950	1543	1543	1543b	N2	1289	104	2		wild_type	ERR16056547		This study
S. enterica	Napoli	UZH_N19-1160		2019	Switzerland	Italy	Espace Mittelland	EM	3284	CH02		Human	Stool						SAL_EB9861AA	SAL_LC3795AA_AS	2008	60	161	147	348	178	155	436	142	247556	247556	247556	247556	107118	7814	7673	7673	7673	7673	7673	N1	1289	104	2		wild_type	ERR16056548		This study
S. enterica	Napoli	UZH_N19-1216		2019	Switzerland	Switzerland	Tessin	TE	6963	CH07		Human	Stool						SAL_EB9858AA	SAL_LC3792AA_AS	474	60	161	147	96	178	155	12	142	247552	247552	247552	247552	247552	137329	97218	24950	1543	1543	1543b	N2	1289	104	2		wild_type	ERR16056549		This study
S. enterica	Napoli	UZH_N19-1217		2019	Switzerland	Switzerland	Ostschweiz	OS	8500	CH05		Human	Stool						SAL_EB9869AA	SAL_LC3803AA_AS	7174	60	161	147	96	178	1139	12	142	247550	204952	204950	204950	204950	107128	97218	24950	1543	1543	1543b	N2	1289	104	2		wild_type	ERR16056550		This study
S. enterica	Napoli	UZH_N19-1222		2019	Switzerland	Switzerland	Nordwestschweiz	NW	4461	CH03		Human	Stool						SAL_EB9873AA	SAL_LC3807AA_AS	474	60	161	147	96	178	155	12	142	247547	247547	204959	204871	204871	204871	107093	24950	1543	1543	1543b	N2	1289	104	2		wild_type	ERR16056551		This study
S. enterica	Napoli	UZH_N19-1237		2019	Switzerland	Switzerland	Zentralschweiz	ZS	6467	CH06		Human	Stool						SAL_EB9827AA	SAL_LC3742AA_AS	474	60	161	147	96	178	155	12	142	247533	247533	204906	204906	204906	204906	107035	24950	1543	1543	1543b	N2	1289	104	2		wild_type	ERR16056552		This study
S. enterica	Napoli	UZH_N19-1318		2019	Switzerland	Switzerland	Tessin	TE	6952	CH07		Human	Stool						SAL_EB9824AA	SAL_LC3740AA_AS	474	60	161	147	96	178	155	12	142	247530	247530	247530	247530	204879	24950	24950	24950	1543	1543	1543b	N2	1289	104	2		wild_type	ERR16056553		This study
S. enterica	Napoli	UZH_N19-1408		2019	Switzerland	Switzerland	Zürich	ZH	8704	CH04		Human	Blood						SAL_EB9817AA	SAL_LC3732AA_AS	474	60	161	147	96	178	155	12	142	247523	247523	247523	247523	204879	24950	24950	24950	1543	1543	1543b	N2	1289	104	2		wild_type	ERR16056554		This study
S. enterica	Napoli	UZH_N19-1468		2019	Switzerland	Switzerland	Zentralschweiz	ZS	6210	CH06		Human	Blood						SAL_EB9814AA	SAL_LC3729AA_AS	8183	60	161	147	1033	178	155	12	142	247522	247522	247522	247522	247522	247522	247522	247522	247522	1543	1543a	N2	1289	104	2		wild_type	ERR16056555		This study
S. enterica	Napoli	UZH_N19-1494		2019	Switzerland	Switzerland	Nordwestschweiz	NW	4055	CH03		Human	Stool						SAL_EB9819AA	SAL_LC3734AA_AS	474	60	161	147	96	178	155	12	142	247531	247531	204909	204899	140601	107128	97218	24950	1543	1543	1543b	N2	1289	104	2		wild_type	ERR16056556		This study
S. enterica	Napoli	UZH_N19-1496		2019	Switzerland	Switzerland	Zentralschweiz	ZS	6210	CH06		Human	Stool						SAL_EB9865AA	SAL_LC3799AA_AS	8183	60	161	147	1033	178	155	12	142	247543	247522	247522	247522	247522	247522	247522	247522	247522	1543	1543a	N2	1289	104	2		wild_type	ERR16056557		This study
S. enterica	Napoli	UZH_N19-1513		2019	Switzerland	Switzerland	Tessin	TE	6575	CH07		Human	Blood						SAL_EB9867AA	SAL_LC3801AA_AS	474	60	161	147	96	178	155	12	142	247545	247545	247545	247545	204986	204907	97218	24950	1543	1543	1543b	N2	1289	104	2		wild_type	ERR16056558		This study
S. enterica	Napoli	UZH_N19-1527		2019	Switzerland	Switzerland	Ostschweiz	OS	8887	CH05		Human	Stool						SAL_EB9859AA	SAL_LC3793AA_AS	474	60	161	147	96	178	155	12	142	247527	247527	204954	204954	204954	107128	97218	24950	1543	1543	1543b	N2	1289	104	2		wild_type	ERR16056559		This study
S. enterica	Napoli	UZH_N19-1532		2019	Switzerland	Switzerland	Zentralschweiz	ZS	6370	CH06		Human	Blood						SAL_EB9823AA	SAL_LC3738AA_AS	474	60	161	147	96	178	155	12	142	247532	247526	204906	204906	204906	204906	107035	24950	1543	1543	1543b	N2	1289	104	2		wild_type	ERR16056560		This study
S. enterica	Napoli	UZH_N19-1557		2019	Switzerland	Switzerland	Tessin	TE	6912	CH07		Human	Stool						SAL_EB9874AA	SAL_LC3808AA_AS	474	60	161	147	96	178	155	12	142	247558	247558	204890	204890	204886	204886	204886	24950	1543	1543	1543b	N2	1289	104	2		wild_type	ERR16056561		This study
S. enterica	Napoli	UZH_N19-1559		2019	Switzerland	Switzerland	Zentralschweiz	ZS	6210	CH06		Human	Stool						SAL_EB9875AA	SAL_LC3809AA_AS	8183	60	161	147	1033	178	155	12	142	247522	247522	247522	247522	247522	247522	247522	247522	247522	1543	1543a	N2	1289	104	2		wild_type	ERR16056562		This study
S. enterica	Napoli	UZH_N19-1591		2019	Switzerland	Switzerland	Tessin	TE	6900	CH07		Human	Stool						SAL_EB9829AA	SAL_LC3744AA_AS	474	60	161	147	96	178	155	12	142	247534	247534	247534	247534	247534	137319	97218	24950	1543	1543	1543b	N2	1289	104	2		wild_type	ERR16056563		This study
S. enterica	Napoli	UZH_N19-1603		2019	Switzerland	Switzerland	Nordwestschweiz	NW	4153	CH03		Human	Blood						SAL_EB9821AA	SAL_LC3736AA_AS	474	60	161	147	96	178	155	12	142	247529	247529	204925	140601	140601	107128	97218	24950	1543	1543	1543b	N2	1289	104	2		wild_type	ERR16056564		This study
S. enterica	Napoli	UZH_N19-1606		2019	Switzerland	Switzerland	Tessin	TE	6825	CH07		Human	Stool						SAL_EB9866AA	SAL_LC3800AA_AS	474	60	161	147	96	178	155	12	142	247544	247544	247544	247544	247544	137318	97218	24950	1543	1543	1543b	N2	1289	104	2		wild_type	ERR16056565		This study
S. enterica	Napoli	UZH_N19-1624		2019	Switzerland	Switzerland	Ostschweiz	OS	7320	CH05		Human	Stool						SAL_EB9812AA	SAL_LC3727AA_AS	474	60	161	147	96	178	155	12	142	247527	247527	204954	204954	204954	107128	97218	24950	1543	1543	1543b	N2	1289	104	2		wild_type	ERR16056566		This study
S. enterica	Napoli	UZH_N19-1679		2019	Switzerland	Switzerland	Zürich	ZH	8706	CH04		Human	Stool						SAL_EB9877AA	SAL_LC3811AA_AS	474	60	161	147	96	178	155	12	142	247554	247554	204909	204899	140601	107128	97218	24950	1543	1543	1543b	N2	1289	104	2		wild_type	ERR16056567		This study
S. enterica	Napoli	UZH_N19-1725		2019	Switzerland	Switzerland	Espace Mittelland	EM	4600	CH02		Human	Stool						SAL_EB9881AA	SAL_LC3815AA_AS	474	60	161	147	96	178	155	12	142	247560	247560	204909	204899	140601	107128	97218	24950	1543	1543	1543b	N2	1289	104	2		wild_type	ERR16056568		This study
S. enterica	Napoli	UZH_N19-1752		2019	Switzerland	Switzerland	Zürich	ZH	8703	CH04		Human	Stool						SAL_EB9826AA	SAL_LC3741AA_AS	474	60	161	147	96	178	155	12	142	247540	247540	204909	204899	140601	107128	97218	24950	1543	1543	1543b	N2	1289	104	2		wild_type	ERR16056569		This study
S. enterica	Napoli	UZH_N19-1782		2019	Switzerland	Italy	Zürich	ZH	8152	CH04		Human	Stool						SAL_EB9863AA	SAL_LC3797AA_AS	2019	60	161	147	348	178	155	12	142	247551	247551	247551	247551	241547	204691	20426	20426	7673	7673	7673	N1	1289	104	2		wild_type	ERR16056570		This study
S. enterica	Napoli	UZH_N19-1804		2019	Switzerland	Switzerland	Ostschweiz	OS	9400	CH05		Human	Stool						SAL_EB9818AA	SAL_LC3733AA_AS	474	60	161	147	96	178	155	12	142	247536	247536	204909	204899	140601	107128	97218	24950	1543	1543	1543b	N2	1289	104	2		wild_type	ERR16056571		This study
S. enterica	Napoli	UZH_N19-1828		2019	Switzerland	Switzerland	Zürich	ZH	8047	CH04		Human	Stool						SAL_EB9813AA	SAL_LC3728AA_AS	474	60	161	147	96	178	155	12	142	247537	247537	247537	204894	204879	24950	24950	24950	1543	1543	1543b	N2	1289	104	2		wild_type	ERR16056572		This study
S. enterica	Napoli	UZH_N19-1853		2019	Switzerland	Switzerland	Nordwestschweiz	NW	4054	CH03		Human	Stool						SAL_EB9822AA	SAL_LC3737AA_AS	474	60	161	147	96	178	155	12	142	247538	247538	204925	140601	140601	107128	97218	24950	1543	1543	1543b	N2	1289	104	2		wild_type	ERR16056573		This study
S. enterica	Napoli	UZH_N19-1900		2019	Switzerland	Switzerland	Zürich	ZH	8707	CH04		Human	Stool						SAL_EB9871AA	SAL_LC3805AA_AS	474	60	161	147	96	178	155	12	142	247559	204909	204909	204899	140601	107128	97218	24950	1543	1543	1543b	N2	1289	104	2		wild_type	ERR16056574		This study
S. enterica	Napoli	UZH_N19-1905		2019	Switzerland	Italy	Nordwestschweiz	NW	5430	CH03		Human	Stool						SAL_EB9880AA	SAL_LC3814AA_AS	474	60	161	147	96	178	155	12	142	247561	96862	96862	96862	96862	24950	24950	24950	1543	1543	1543b	N2	1289	104	2		wild_type	ERR16056575		This study
S. enterica	Napoli	UZH_N19-1909		2019	Switzerland	Switzerland	Nordwestschweiz	NW	4055	CH03		Human	Stool						SAL_EB9816AA	SAL_LC3731AA_AS	474	60	161	147	96	178	155	12	142	247524	247524	247524	204899	140601	107128	97218	24950	1543	1543	1543b	N2	1289	104	2		wild_type	ERR16056576		This study
S. enterica	Napoli	UZH_N19-1932		2019	Switzerland	Switzerland	Zürich	ZH	8706	CH04		Human	Stool						SAL_EB9862AA	SAL_LC3796AA_AS	474	60	161	147	96	178	155	12	142	247546	204909	204909	204899	140601	107128	97218	24950	1543	1543	1543b	N2	1289	104	2		wild_type	ERR16056577		This study
S. enterica	Napoli	UZH_N19-1942		2019	Switzerland	Italy	Ostschweiz	OS	7013	CH05		Human	Stool						SAL_EB9864AA	SAL_LC3798AA_AS	2008	60	161	147	348	178	155	436	142	247549	216862	216862	216862	216862	107106	7673	7673	7673	7673	7673	N1	1289	104	2		wild_type	ERR16056578		This study
S. enterica	Napoli	UZH_N19-1972		2019	Switzerland	Switzerland	Espace Mittelland	EM	3661	CH02		Human	Stool						SAL_EB9870AA	SAL_LC3804AA_AS	474	60	161	147	96	178	155	12	142	247553	247553	247553	247553	247553	107128	97218	24950	1543	1543	1543b	N2	1289	104	2		wild_type	ERR16056579		This study
S. enterica	Napoli	UZH_N19-1979		2019	Switzerland	Switzerland	Zentralschweiz	ZS	6370	CH06		Human	Stool						SAL_EB9815AA	SAL_LC3730AA_AS	474	60	161	147	96	178	155	12	142	247541	247541	247541	204894	204879	24950	24950	24950	1543	1543	1543b	N2	1289	104	2		wild_type	ERR16056580		This study
S. enterica	Napoli	UZH_N19-1993		2019	Switzerland	Switzerland	Tessin	TE	6826	CH07		Human	Stool						SAL_EB9872AA	SAL_LC3806AA_AS	474	60	161	147	96	178	155	12	142	247557	247557	247557	247557	247557	247557	97218	24950	1543	1543	1543b	N2	1289	104	2		wild_type	ERR16056581		This study
S. enterica	Napoli	UZH_N19-2062		2019	Switzerland	Switzerland	Nordwestschweiz	NW	4243	CH03		Human	Stool						SAL_EB9860AA	SAL_LC3794AA_AS	474	60	161	147	96	178	155	12	142	247565	247565	204909	204899	140601	107128	97218	24950	1543	1543	1543b	N2	1289	104	2		wild_type	ERR16056582		This study
S. enterica	Napoli	UZH_N19-2158		2019	Switzerland	Switzerland	Zürich	ZH	8704	CH04		Human	Stool						SAL_EB9878AA	SAL_LC3812AA_AS	474	60	161	147	96	178	155	12	142	247562	247562	247523	247523	204879	24950	24950	24950	1543	1543	1543b	N2	1289	104	2		wild_type	ERR16056583		This study
S. enterica	Napoli	UZH_N19-2193		2019	Switzerland	Switzerland	Ostschweiz	OS	9490	CH05		Human	Stool						SAL_EB9811AA	SAL_LC3726AA_AS	474	60	161	147	96	178	155	12	142	247525	247525	247525	247525	247525	205011	107035	24950	1543	1543	1543b	N2	1289	104	2		wild_type	ERR16056584		This study
S. enterica	Napoli	UZH_N19-2205		2019	Switzerland	Switzerland	Zentralschweiz	ZS	6440	CH06		Human	Stool						SAL_EB9810AA	SAL_LC3725AA_AS	474	60	161	147	96	178	155	12	142	247526	247526	204906	204906	204906	204906	107035	24950	1543	1543	1543b	N2	1289	104	2		wild_type	ERR16056585		This study
S. enterica	Napoli	UZH_N19-2208		2019	Switzerland	Switzerland	Nordwestschweiz	NW	4052	CH03		Human	Stool						SAL_EB9879AA	SAL_LC3813AA_AS	474	60	161	147	96	178	155	12	142	247555	247555	247555	140601	140601	107128	97218	24950	1543	1543	1543b	N2	1289	104	2		wild_type	ERR16056586		This study
S. enterica	Napoli	UZH_N19-2217		2019	Switzerland	Switzerland	Nordwestschweiz	NW	4431	CH03		Human	Stool						SAL_EB9820AA	SAL_LC3735AA_AS	474	60	161	147	96	178	155	12	142	247528	247528	247528	140601	140601	107128	97218	24950	1543	1543	1543b	N2	1289	104	2		wild_type	ERR16056588		This study
S. enterica	Napoli	UZH_N19-2218		2019	Switzerland	Switzerland	Nordwestschweiz	NW	4431	CH03		Human	Blood						SAL_EB9828AA	SAL_LC3743AA_AS	474	60	161	147	96	178	155	12	142	247535	247528	247528	140601	140601	107128	97218	24950	1543	1543	1543b	N2	1289	104	2		wild_type	ERR16056589		This study
S. enterica	Napoli	UZH_N19-2308		2019	Switzerland	Switzerland	Zentralschweiz	ZS	4806	CH06		Human	Stool						SAL_EB9825AA	SAL_LC3739AA_AS	474	60	161	147	96	178	155	12	142	247539	247539	247539	247539	247539	247539	204944	204873	204873	1543	1543a	N2	1289	104	2		wild_type	ERR16056590		This study
S. enterica	Napoli	UZH_N19-2394		2019	Switzerland	Italy	Zentralschweiz	ZS	6205	CH06		Human	Stool						SAL_EB9882AA	SAL_LC3816AA_AS	2019	60	161	147	348	178	155	12	142	247563	247563	247563	247563	247563	247563	20426	20426	7673	7673	7673	N1	1289	104	2		wild_type	ERR16056591		This study
S. enterica	Napoli	UZH_N19-930		2019	Switzerland	Italy	Zentralschweiz	ZS	6044	CH06		Human	Stool						SAL_ZA7000AA	SAL_SB4342AA_AS	2008	60	161	147	348	178	155	436	142	205102	205102	205102	205102	20403	20403	20403	7673	7673	7673	7673	N1	1289	104	2		wild_type	ERR16062681		This study
S. enterica	Napoli	201905078		2019	France	France	Bretagne	56	56410	FRH04		Human	Stool	7	12	Female	85	Isolated	SAL_ZA6571AA	SAL_SB2844AA_AS	474	60	161	147	96	178	155	12	142	204680	204680	204680	204680	124002	124002	27729	27729	27729	1543	1543a	N2	1289	104	2		wild_type	ERR16083726		This study
S. enterica	Napoli	201906884		2019	France	France	Nouvelle-Aquitaine	33	33910	FRI12	No Travel declared	Human	Stool	08	20	Male	1		SAL_BB2316AA	SAL_VB8287AA_AS	474	60	161	147	96	178	155	12	142	216228	216228	216228	216228	140742	140702	27733	27733	27729	1543	1543a	N2	1289	104	2		wild_type	ERR16083786		This study
S. enterica	Napoli	201906934		2019	France	Italy	Grand-Est	68		FRF12		Human	Stool	08	20	Female	1	Isolated	SAL_BB2318AA	SAL_VB8289AA_AS	4547	60	782	147	151	178	155	12	142	216229	216229	216229	216229	216229	216229	107019	107014	1450	1450	1450	N1	1289	104	2		wild_type	ERR16083787		This study
S. enterica	Napoli	201906974		2019	France	France	Pays-de-la-Loire	49	49230	FRG02		Human	Stool	08	26	Male	< 1	Isolated	SAL_BB2319AA	SAL_VB8290AA_AS	474	60	161	147	96	178	155	12	142	216232	216232	216232	216232	124002	124002	27729	27729	27729	1543	1543a	N2	1289	104	2		wild_type	ERR16083788		This study
S. enterica	Napoli	201907135		2019	France	France	Bourgogne_Franche-Comté	71	71380	FRC13	No Travel declared	Human	Stool	08	27	Male	4		SAL_BB2320AA	SAL_VB8291AA_AS	474	60	161	147	96	178	155	12	142	216230	216230	216230	140599	140599	140587	140587	27729	27729	1543	1543a	N2	1289	104	2		wild_type	ERR16083789		This study
S. enterica	Napoli	201907178		2019	France	France	Pays-de-la-Loire	53	53200	FRG03		Human	Blood	08	29	Female	76		SAL_BB2321AA	SAL_VB8292AA_AS	474	60	161	147	96	178	155	12	142	216241	216241	216241	216241	216241	140611	27729	27729	27729	1543	1543a	N2	1289	104	2		wild_type	ERR16083790		This study
S. enterica	Napoli	201907181		2019	France	France	Pays-de-la-Loire	72	72460	FRG04		Human	Stool	08	29	Male	78	Isolated	SAL_BB2322AA	SAL_VB8293AA_AS	474	60	161	147	96	178	155	12	142	216238	216238	216238	216238	216238	140611	27729	27729	27729	1543	1543a	N2	1289	104	2		wild_type	ERR16083791		This study
S. enterica	Napoli	201907267		2019	France	France	Pays-de-la-Loire	49	49260	FRG02	No Travel declared	Human	Stool	08	29	Female	70	Family	SAL_BB2349AA	SAL_VB8320AA_AS	474	60	161	147	96	178	155	12	142	216266	216266	216266	216266	216266	140611	27729	27729	27729	1543	1543a	N2	1289	104	2		wild_type	ERR16083792		This study
S. enterica	Napoli	201907330		2019	France	France	Pays-de-la-Loire	49	49230	FRG02		Human	Stool	08	29	Female	3	Isolated	SAL_BB2323AA	SAL_VB8294AA_AS	474	60	161	147	96	178	155	12	142	216240	216240	216232	216232	124002	124002	27729	27729	27729	1543	1543a	N2	1289	104	2		wild_type	ERR16083793		This study
S. enterica	Napoli	201907337		2019	France	France	Pays-de-la-Loire	85	85400	FRG05		Human	Stool	08	31	Female	82	Isolated	SAL_BB2324AA	SAL_VB8295AA_AS	474	60	161	147	96	178	155	12	142	216234	216234	216234	216234	216234	140729	27729	27729	27729	1543	1543a	N2	1289	104	2		wild_type	ERR16083794		This study
S. enterica	Napoli	201907399		2019	France	France	Pays-de-la-Loire	44		FRG01	No Travel declared	Human	Stool	08	28	Female	< 1	Isolated	SAL_BB2325AA	SAL_VB8296AA_AS	474	60	161	147	96	178	155	12	142	216239	216239	216239	216239	140608	27733	27733	27733	27729	1543	1543a	N2	1289	104	2		wild_type	ERR16083795		This study
S. enterica	Napoli	201907416		2019	France	France	Provence-Alpes-Cote-dAzur	83	83400	FRL05		Human	Stool	09	02	Male	27		SAL_BB2354AA	SAL_VB8325AA_AS	474	60	161	147	96	178	155	12	142	216290	216290	216290	204721	204671	140611	27729	27729	27729	1543	1543a	N2	1289	104	2		wild_type	ERR16083796		This study
S. enterica	Napoli	201907490		2019	France	France	Pays-de-la-Loire	44	44400	FRG01		Human	Stool	09	03	Female	59	Isolated	SAL_BB2326AA	SAL_VB8297AA_AS	474	60	161	147	96	178	155	12	142	216237	216237	216237	216237	204687	140587	140587	27729	27729	1543	1543a	N2	1289	104	2		wild_type	ERR16083797		This study
S. enterica	Napoli	201907545		2019	France	France	Nouvelle-Aquitaine	86	86330	FRI34		Human	Stool	09	03	Male	74	Isolated	SAL_BB2327AA	SAL_VB8298AA_AS	474	60	161	147	96	178	155	12	142	216246	216246	216246	216246	27733	27733	27733	27733	27729	1543	1543a	N2	1289	104	2		wild_type	ERR16083798		This study
S. enterica	Napoli	201907589		2019	France	France	Nouvelle-Aquitaine	17	17700	FRI32		Human	Stool	09	06	Female	70	Isolated	SAL_BB2358AA	SAL_VB8329AA_AS	474	60	161	147	96	178	155	12	142	216285	216285	216285	216285	216285	140729	27729	27729	27729	1543	1543a	N2	1289	104	2		wild_type	ERR16083799		This study
S. enterica	Napoli	201907771		2019	France	France	Grand-Est	68	68200	FRF12		Human	Blood	09	05	Female	5		SAL_BB2330AA	SAL_VB8301AA_AS	474	60	161	147	96	178	155	12	142	216253	216253	216253	140601	140601	107128	97218	24950	1543	1543	1543b	N2	1289	104	2		wild_type	ERR16083800		This study
S. enterica	Napoli	201907779		2019	France	France	Nouvelle-Aquitaine	16	16100	FRI31		Human	Stool	09	06	Female	3		SAL_BB2328AA	SAL_VB8299AA_AS	474	60	161	147	96	178	155	12	142	216248	216248	216248	216248	216248	140653	27733	27733	27729	1543	1543a	N2	1289	104	2		wild_type	ERR16083801		This study
S. enterica	Napoli	201907870		2019	France	France	Nouvelle-Aquitaine	33	33000	FRI12	No Travel declared	Human	Stool	09	09	Male	< 1		SAL_BB2329AA	SAL_VB8300AA_AS	5173	60	161	147	96	1087	155	12	142	216252	216252	216252	216252	216252	140702	27733	27733	27729	1543	1543a	N2	1289	104	2		wild_type	ERR16083802		This study
S. enterica	Napoli	201907937		2019	France	France	Nouvelle-Aquitaine	17	17670	FRI32		Human	Stool	09	10	Female	1	Isolated	SAL_BB2331AA	SAL_VB8302AA_AS	5170	60	161	781	96	178	155	12	142	216247	216247	216247	216247	216247	140623	140623	140623	27729	1543	1543a	N2	1289	104	2		wild_type	ERR16083803		This study
S. enterica	Napoli	201907962		2019	France	France	Centre_Val-de-Loire	41	41000	FRB05		Human	Stool	09	08	Male	68	Isolated	SAL_BB2332AA	SAL_VB8303AA_AS	474	60	161	147	96	178	155	12	142	216249	216249	216249	216249	140643	140643	27729	27729	27729	1543	1543a	N2	1289	104	2		wild_type	ERR16083804		This study
S. enterica	Napoli	201907973		2019	France	France	Pays-de-la-Loire	85	85200	FRG05	No Travel declared	Human	Stool	09	09	Male	1	Family	SAL_BB2355AA	SAL_VB8326AA_AS	474	60	161	147	96	178	155	12	142	216284	216284	216284	216284	140671	140650	27729	27729	27729	1543	1543a	N2	1289	104	2		wild_type	ERR16083805		This study
S. enterica	Napoli	201907997		2019	France	France	Nouvelle-Aquitaine	79	79140	FRI33		Human	Stool	09	12	Male	76	Isolated	SAL_BB2357AA	SAL_VB8328AA_AS	474	60	161	147	96	178	155	12	142	216283	216283	216283	216283	216283	140597	27729	27729	27729	1543	1543a	N2	1289	104	2		wild_type	ERR16083806		This study
S. enterica	Napoli	201908088		2019	France	France	Nouvelle-Aquitaine	17	17000	FRI32	No Travel declared	Human	Stool	09	12	Female	96	Isolated	SAL_BB2347AA	SAL_VB8318AA_AS	474	60	161	147	96	178	155	12	142	216263	216263	216263	216263	216263	140604	27729	27729	27729	1543	1543a	N2	1289	104	2		wild_type	ERR16083807		This study
S. enterica	Napoli	201908096		2019	France	France	Nouvelle-Aquitaine	24	24120	FRI11		Human	Stool	09	11	Male	57	Isolated	SAL_BB2333AA	SAL_VB8304AA_AS	474	60	161	147	96	178	155	12	142	216255	216255	216255	216255	216255	140580	27733	27733	27729	1543	1543a	N2	1289	104	2		wild_type	ERR16083808		This study
S. enterica	Napoli	201908455		2019	France	France	Nouvelle-Aquitaine	33	33530	FRI12	No Travel declared	Human	Stool	09	19	Male	6	Isolated	SAL_BB2360AA	SAL_VB8331AA_AS	474	60	161	147	96	178	155	12	142	216291	216291	216291	216291	216291	140576	27733	27733	27729	1543	1543a	N2	1289	104	2		wild_type	ERR16083809		This study
S. enterica	Napoli	201908514		2019	France	France	Pays-de-la-Loire	85	85220	FRG05	No Travel declared	Human	Blood	09	21	Female	62	Isolated	SAL_BB2334AA	SAL_VB8305AA_AS	474	60	161	147	96	178	155	12	142	216256	216256	216256	216256	27733	27733	27733	27733	27729	1543	1543a	N2	1289	104	2		wild_type	ERR16083810		This study
S. enterica	Napoli	201908518		2019	France	France	Centre_Val-de-Loire	37	37500	FRB04		Human	Stool	09	16	Female	1	Isolated	SAL_BB2336AA	SAL_VB8307AA_AS	474	60	161	147	96	178	155	12	142	216254	216254	216254	216254	216254	204628	27729	27729	27729	1543	1543a	N2	1289	104	2		wild_type	ERR16083811		This study
S. enterica	Napoli	201908616		2019	France	Italy	Ile-de-France	92		FR105		Human	Stool	08	06	Male	33	Isolated	SAL_BB2337AA	SAL_VB8308AA_AS	4552	60	161	147	348	178	155	12	849	216257	216257	216257	216257	216257	216257	107120	107120	107120	107120	107120	N1	1289	104	2		wild_type	ERR16083812		This study
S. enterica	Napoli	201908646		2019	France	France	Pays-de-la-Loire	85	85140	FRG05		Human	Stool	09	23	Male	< 1	Isolated	SAL_BB2341AA	SAL_VB8312AA_AS	474	60	161	147	96	178	155	12	142	216258	216258	216258	140681	124002	124002	27729	27729	27729	1543	1543a	N2	1289	104	2		wild_type	ERR16083813		This study
S. enterica	Napoli	201908847		2019	France	France	Occitanie	12	12850	FRJ22	No Travel declared	Human	Stool	09	25	Female	72	Isolated	SAL_BB2338AA	SAL_VB8309AA_AS	474	60	161	147	96	178	155	12	142	216262	216262	216262	216262	216262	216262	140588	140588	140575	1543	1543a	N2	1289	104	2		wild_type	ERR16083814		This study
S. enterica	Napoli	201908909		2019	France	France	Nouvelle-Aquitaine	79	79000	FRI33	No Travel declared	Human	Stool	09	28	Male	< 1	Isolated	SAL_BB2340AA	SAL_VB8310AA_AS	474	60	161	147	96	178	155	12	142	216261	216261	216261	216261	140697	140655	27729	27729	27729	1543	1543a	N2	1289	104	2		wild_type	ERR16083815		This study
S. enterica	Napoli	201908915		2019	France	France	Pays-de-la-Loire	44	44550	FRG01		Human	Stool	09	26	Female	17		SAL_BB2339AA	SAL_VB8311AA_AS	474	60	161	147	96	178	155	12	142	216259	216259	204627	204627	27733	27733	27733	27733	27729	1543	1543a	N2	1289	104	2		wild_type	ERR16083816		This study
S. enterica	Napoli	201908962		2019	France	France	Pays-de-la-Loire	72		FRG04		Human	Blood	10	01	Female	84	Isolated	SAL_BB2343AA	SAL_VB8314AA_AS	474	60	161	147	96	178	155	12	142	216264	216264	216264	216264	216238	140611	27729	27729	27729	1543	1543a	N2	1289	104	2		wild_type	ERR16083817		This study
S. enterica	Napoli	201909010		2019	France	France	Grand-Est	88		FRF34		Human	Stool	10	04	Female	73		SAL_BB2356AA	SAL_VB8327AA_AS	474	60	161	147	96	178	155	12	142	216288	216287	216287	216287	216287	216287	27729	27729	27729	1543	1543a	N2	1289	104	2		wild_type	ERR16083818		This study
S. enterica	Napoli	201909044		2019	France	France	Nouvelle-Aquitaine	17		FRI32		Human	Stool	10	01	Male	< 1		SAL_BB2342AA	SAL_VB8313AA_AS	474	60	161	147	96	178	155	12	142	216260	216260	216260	216260	216260	140653	27733	27733	27729	1543	1543a	N2	1289	104	2		wild_type	ERR16083819		This study
S. enterica	Napoli	201909050		2019	France	France	Nouvelle-Aquitaine	79	79290	FRI33		Human	Stool	10	02	Female	< 1		SAL_BB2345AA	SAL_VB8316AA_AS	474	60	161	147	96	178	155	12	142	216265	216265	216265	216265	216265	216265	27729	27729	27729	1543	1543a	N2	1289	104	2		wild_type	ERR16083820		This study
S. enterica	Napoli	201909152		2019	France	France	Pays-de-la-Loire	49	49540	FRG02		Human	Stool	10	04	Male	19	Isolated	SAL_BB2344AA	SAL_VB8315AA_AS	474	60	161	147	96	178	155	12	142	216269	216269	216269	216265	216265	216265	27729	27729	27729	1543	1543a	N2	1289	104	2		wild_type	ERR16083821		This study
S. enterica	Napoli	201909213		2019	France	France	Nouvelle-Aquitaine	16	16240	FRI31		Human	Stool	10	03	Female	84	Isolated	SAL_BB2346AA	SAL_VB8317AA_AS	474	60	161	147	96	178	155	12	142	216268	216268	216268	216268	216268	140591	27733	27733	27729	1543	1543a	N2	1289	104	2		wild_type	ERR16083822		This study
S. enterica	Napoli	201909316		2019	France	France	Pays-de-la-Loire	44	44700	FRG01		Human	Stool	10	08	Female	66	Isolated	SAL_BB2348AA	SAL_VB8319AA_AS	474	60	161	147	96	178	155	12	142	216270	216270	216270	216270	124002	124002	27729	27729	27729	1543	1543a	N2	1289	104	2		wild_type	ERR16083823		This study
S. enterica	Napoli	201909509		2019	France	France	Grand-Est	10	10600	FRF22		Human	Abcess	10	14	Male	45		SAL_BB2359AA	SAL_VB8330AA_AS	474	60	161	147	96	178	155	12	142	216292	216287	216287	216287	216287	216287	27729	27729	27729	1543	1543a	N2	1289	104	2		wild_type	ERR16083824		This study
S. enterica	Napoli	201909521		2019	France	France	Pays-de-la-Loire	44	44220	FRG01	No Travel declared	Human	Stool	10	11	Female	< 1	Isolated	SAL_BB2352AA	SAL_VB8323AA_AS	474	60	161	147	96	178	155	12	142	216289	216289	216289	216289	27733	27733	27733	27733	27729	1543	1543a	N2	1289	104	2		wild_type	ERR16083825		This study
S. enterica	Napoli	201909522		2019	France	France	Hauts-de-France	59		FRE11		Human	Stool	10	12	Female	60		SAL_BB2351AA	SAL_VB8322AA_AS	474	60	161	147	96	178	155	12	142	216287	216287	216287	216287	216287	216287	27729	27729	27729	1543	1543a	N2	1289	104	2	aadA22,tet(A)	wild_type	ERR16083826		This study
S. enterica	Napoli	201909539		2019	France	France	Pays-de-la-Loire	72		FRG04		Human	Stool	10	15	Female	2	Isolated	SAL_BB2361AA	SAL_VB8332AA_AS	474	60	161	147	96	178	155	12	142	216295	140748	140648	140648	140648	140611	27729	27729	27729	1543	1543a	N2	1289	104	2		wild_type	ERR16083827		This study
S. enterica	Napoli	201909567		2019	France	France	Nouvelle-Aquitaine	17	17140	FRI32	No Travel declared	Human	Stool	10	14	Male	< 1		SAL_BB2350AA	SAL_VB8321AA_AS	474	60	161	147	96	178	155	12	142	216267	216267	216267	204844	140781	140604	27729	27729	27729	1543	1543a	N2	1289	104	2		wild_type	ERR16083828		This study
S. enterica	Napoli	201909781		2019	France	France	Pays-de-la-Loire	49		FRG02		Human	Stool	10	22	Male	92	Isolated	SAL_BB2353AA	SAL_VB8324AA_AS	474	60	161	147	96	178	155	12	142	216286	216286	216286	216286	204618	140659	27733	27733	27729	1543	1543a	N2	1289	104	2		wild_type	ERR16083830		This study
S. enterica	Napoli	201909860		2019	France	France	Pays-de-la-Loire	85	85000	FRG05	No Travel declared	Human	Stool	10	19	Male	84		SAL_BB2362AA	SAL_VB8333AA_AS	474	60	161	147	96	178	155	12	142	216294	216294	216294	140713	140713	140713	27733	27733	27729	1543	1543a	N2	1289	104	2		wild_type	ERR16083831		This study
S. enterica	Napoli	201909880		2019	France	France	Pays-de-la-Loire	44	44410	FRG01		Human	Stool	10	22	Female	2		SAL_BB2363AA	SAL_VB8334AA_AS	474	60	161	147	96	178	155	12	142	216293	216293	216293	216293	140608	27733	27733	27733	27729	1543	1543a	N2	1289	104	2		wild_type	ERR16083832		This study
S. enterica	Napoli	201909891		2019	France	Italy	Corse	20	20167	FRM01		Human	Stool	10	25	Male	11	Isolated	SAL_BB2365AA	SAL_VB8336AA_AS	2008	60	161	147	348	178	155	436	142	216298	216298	216298	216298	174430	20408	7673	7673	7673	7673	7673	N1	1289	104	2		wild_type	ERR16083833		This study
S. enterica	Napoli	201910028		2019	France	France	Nouvelle-Aquitaine	86	86140	FRI34		Human	Stool	10	24	Male	< 1		SAL_BB2364AA	SAL_VB8335AA_AS	474	60	161	147	96	178	155	12	142	216296	216296	216296	216296	216296	216296	27729	27729	27729	1543	1543a	N2	1289	104	2		wild_type	ERR16083834		This study
S. enterica	Napoli	201910053		2019	France	France	Pays-de-la-Loire	44		FRG01		Human	Blood	10	24	Male	64	Isolated	SAL_BB2366AA	SAL_VB8337AA_AS	474	60	161	147	96	178	155	12	142	216297	216297	216297	216297	216297	124002	27729	27729	27729	1543	1543a	N2	1289	104	2	aph(6)-Id,aph(3'')-Ib,aadA2,sul1,dfrA12,mph(A)	wild_type	ERR16083835		This study
S. enterica	Napoli	201910096		2019	France	France	Nouvelle-Aquitaine	87	87800	FRI23		Human	Stool	10	29	Female	71	Isolated	SAL_BB2313AA	SAL_VB8284AA_AS	474	60	161	147	96	178	155	12	142	216226	216226	216226	216226	176319	176319	27733	27733	27729	1543	1543a	N2	1289	104	2		wild_type	ERR16083836		This study
S. enterica	Napoli	201910143		2019	France	France	Pays-de-la-Loire	85	85700	FRG05	No Travel declared	Human	Articular	11	03	Male	79	Isolated	SAL_BB2312AA	SAL_VB8283AA_AS	474	60	161	147	96	178	155	12	142	216221	216221	216221	216221	216221	140611	27729	27729	27729	1543	1543a	N2	1289	104	2		wild_type	ERR16083837		This study
S. enterica	Napoli	201910189		2019	France	France	Pays-de-la-Loire	44	44630	FRG01		Human	Stool	10	26	Male	91		SAL_BB2314AA	SAL_VB8285AA_AS	474	60	161	147	96	178	155	12	142	216224	216224	204627	204627	27733	27733	27733	27733	27729	1543	1543a	N2	1289	104	2		wild_type	ERR16083838		This study
S. enterica	Napoli	201910311		2019	France	France	Pays-de-la-Loire	72	72240	FRG04		Human	Urine	11	06	Female	72		SAL_BB3586AA	SAL_WB1711AA_AS	474	60	161	147	96	178	155	12	142	217674	217674	217674	217674	216241	140611	27729	27729	27729	1543	1543a	N2	1289	104	2		wild_type	ERR16083839		This study
S. enterica	Napoli	2020LSAL01052		2020	France	France	Nouvelle-Aquitaine	23		FRI22		Environment	Water-River	7	15				SAL_IB5843AA	SAL_QC4131AA_AS	474	60	161	147	96	178	155	12	142	276439	276439	276439	276439	276439	140578	27733	27733	27729	1543	1543a	N2	1289	104	2		wild_type	ERR16094198		This study
S. enterica	Napoli	2020LSAL01689		2020	France	France	Bourgogne_Franche-Comté	71	71400	FRC13		Environment	Poultry_Gallus gallus	9	28				SAL_IB5816AA	SAL_QC4104AA_AS	474	60	161	147	96	178	155	12	142	276430	276430	276430	276430	276430	276430	27729	27729	27729	1543	1543a	N2	1289	104	2		wild_type	ERR16094199		This study
S. enterica	Napoli	2020LSAL01891		2020	France	France	Nouvelle-Aquitaine	24	24800	FRI11		Environment	Poultry_Guinea fowl	10	5				SAL_IB5852AA	SAL_QC4140AA_AS	474	60	161	147	96	178	155	12	142	276441	276441	276441	276441	140668	140668	27733	27733	27729	1543	1543a	N2	1289	104	2		wild_type	ERR16094200		This study
S. enterica	Napoli	S20TA020		2020	France	France	Grand-Est	10		FRF22		Animal	Bovine_wild-roedear_gut_content						SAL_IB2327AA	SAL_PC9260AA_AS	474	60	161	147	96	178	155	12	142	272813	272813	272813	272813	140814	140652	27729	27729	27729	1543	1543a	N2	1289	104	2		wild_type	ERR16097029		This study
S. enterica	Napoli	20200688	S20200688	2020	Spain	Spain	Cantabria	Cantabria		ES130		Animal	Bivalve_wild_Raw_clams	6	12				SAL_QB6840AA	SAL_ZC6765AA_AS	474	60	161	147	96	178	155	12	142	346047	346047	346047	346047	346047	346047	346047	343813	343813	1543	1543c	N2	1289	104	2		wild_type	ERR16088489		This study
S. enterica	Napoli	20202045	S20202045	2020	Spain	Spain	Cantabria	Cantabria		ES130		Animal	Bivalve_wild_Raw_clams	12	23				SAL_QB6831AA	SAL_ZC6756AA_AS	10180	60	161	147	1239	178	155	12	142	346053	346053	346053	346053	346053	346053	346053	346053	343813	1543	1543c	N2	1289	104	2		wild_type	ERR16088490		This study
S. enterica	Napoli	20221975	S20221975	2022	Spain	Spain	Asturias	Asturias		ES120		Human	Stool	6	20	Male	63	Isolated	SAL_QB7249AA	SAL_ZC7155AA_AS	474	60	161	147	96	178	155	12	142	346350	346350	346350	346350	344881	344881	344881	343813	343813	1543	1543c	N2	1289	104	2		wild_type	ERR16088491		This study
S. enterica	Napoli	20223714	S20223714	2022	Spain	Spain	Asturias	Asturias		ES120		Human	Stool	8	17	Male	79		SAL_QB6833AA	SAL_ZC6758AA_AS	474	60	161	147	96	178	155	12	142	346055	346055	346055	346055	346055	346054	344480	343813	343813	1543	1543c	N2	1289	104	2		wild_type	ERR16088492		This study
S. enterica	Napoli	20223722	S20223722	2022	Spain	Spain	Asturias	Asturias		ES120		Human	Stool	9	14	Male	69	Isolated	SAL_QB6832AA	SAL_ZC6757AA_AS	10179	60	161	147	1238	178	155	12	142	346048	346048	346048	346048	346048	343813	343813	343813	343813	1543	1543c	N2	1289	104	2		wild_type	ERR16088493		This study
S. enterica	Napoli	20223725	S20223725	2022	Spain	Spain	Asturias	Asturias		ES120		Human	Stool	9	6	Female	78	Isolated	SAL_QB7251AA	SAL_ZC7157AA_AS	474	60	161	147	96	178	155	12	142	346351	346351	346351	344462	344462	343813	343813	343813	343813	1543	1543c	N2	1289	104	2		wild_type	ERR16088494		This study
S. enterica	Napoli	202208589		2022	France		Hauts-de-France	59	59820	FRE11	Travel_to_Sicily	Human	Stool	8	27	Female	62		SAL_OB3374AA	SAL_WC8271AA_AS	2019	60	161	147	348	178	155	12	142	324498	324498	324498	324498	324498	324498	324498	63054	63054	63054	63054	N1	1289	104	2		wild_type	ERR16084281	CP163486-CP163487	This study
S. enterica	Napoli	173K	WS0227	1943-1945	Italy	Italy	Campania	Naples		ITF3		Human	stool						SAL_SA4065AA	SAL_DB8705AA_AS	7211	60	161	147	151	NaN	155	12	142	140585	140585	140585	140585	140585	97208	97208	1748	1450	1450	1450	N1	1289	104	2		wild_type	ERR7735477		This study
S. enterica	Napoli (predicted)	A_16-0763	S16LNR0763	2016	France	France	Nouvelle-Aquitaine	79		FRI33		Environment	Poultry	9	1				SAL_HB8056AA	SAL_PC3096AA_AS	474	60	161	147	96	178	155	12	142	264000	264000	264000	264000	140718	140659	27733	27733	27729	1543	1543a	N2	1289	104	2		wild_type	ERR16060996		This study
S. enterica	Napoli (predicted)	A_16-1021	S16LNR1021	2016	France	France	Nouvelle-Aquitaine	19		FRI21		Environment	Poultry	5	30				SAL_HB8054AA	SAL_PC3094AA_AS	474	60	161	147	96	178	155	12	142	264003	264003	264003	264003	264003	140740	140740	140588	140575	1543	1543a	N2	1289	104	2		wild_type	ERR16060997		This study
S. enterica	Napoli (predicted)	A_16-1066	S16LNR1066	2016	France	France	Pays-de-la-Loire	72		FRG04		Environment	Poultry	9	1				SAL_HB8053AA	SAL_PC3093AA_AS	474	60	161	147	96	178	155	12	142	263999	263999	263999	216264	216238	140611	27729	27729	27729	1543	1543a	N2	1289	104	2		wild_type	ERR16060998		This study
S. enterica	Napoli (predicted)	A_16-1206	S16LNR1206	2016	France	France	Pays-de-la-Loire	44		FRG01		Environment	Poultry	9	21				SAL_HB8057AA	SAL_PC3097AA_AS	474	60	161	147	96	178	155	12	142	264014	264014	264014	264014	264014	140587	140587	27729	27729	1543	1543a	N2	1289	104	2		wild_type	ERR16060999		This study
S. enterica	Napoli (predicted)	A_16-1260	S16LNR1260	2016	France	France	Pays-de-la-Loire	49		FRG02		Environment	Poultry	9	28				SAL_HB8058AA	SAL_PC3098AA_AS	474	60	161	147	96	178	155	12	142	263996	263996	263996	263996	263996	140597	27729	27729	27729	1543	1543a	N2	1289	104	2		wild_type	ERR16061000		This study
S. enterica	Napoli (predicted)	A_16-1511	S16LNR1511	2016	France	France	Bretagne	35		FRH03		Environment	Poultry	10	1				SAL_HB8061AA	SAL_PC3101AA_AS	474	60	161	147	96	178	155	12	142	264002	264002	264002	241999	204671	140611	27729	27729	27729	1543	1543a	N2	1289	104	2		wild_type	ERR16061001		This study
S. enterica	Napoli (predicted)	A_16-2393	S16LNR2393	2016	France	France	Nouvelle-Aquitaine	24		FRI11		Environment	Poultry	8	23				SAL_HB8063AA	SAL_PC3103AA_AS	474	60	161	147	96	178	155	12	142	264021	264021	264021	264021	264021	234468	27733	27733	27729	1543	1543a	N2	1289	104	2		wild_type	ERR16061002		This study
S. enterica	Napoli (predicted)	A_16-2395	S16LNR2395	2016	France	France	Nouvelle-Aquitaine	24		FRI11		Environment	Poultry	9	5				SAL_HB8059AA	SAL_PC3099AA_AS	474	60	161	147	96	178	155	12	142	263997	263997	263997	263997	263997	263997	27733	27733	27729	1543	1543a	N2	1289	104	2		wild_type	ERR16061003		This study
S. enterica	Napoli (predicted)	A_16-2397	S16LNR2397	2016	France	France	Nouvelle-Aquitaine	87		FRI23		Environment	Poultry	8	29				SAL_HB8060AA	SAL_PC3100AA_AS	474	60	161	147	96	178	155	12	142	263998	263998	263998	263998	140664	140580	27733	27733	27729	1543	1543a	N2	1289	104	2		wild_type	ERR16061004		This study
S. enterica	Napoli (predicted)	A_16-2402	S16LNR2402	2016	France	France	Nouvelle-Aquitaine	47		FRI14		Environment	Poultry	10	27				SAL_HB8062AA	SAL_PC3102AA_AS	8534	60	161	147	96	1085	1311	12	142	264005	264005	264005	264005	264005	264005	264005	140575	140575	1543	1543a	N2	1289	104	2		wild_type	ERR16061005		This study
S. enterica	Napoli (predicted)	201604870		2016	France	France	Nouvelle-Aquitaine	19	19100	FRI21		Human	Stool	6	19	Female	92	Isolated	SAL_SA4068AA	SAL_DB8603AA_AS	474	60	161	147	96	178	155	12	142	140580	140580	140580	140580	140580	140580	27733	27733	27729	1543	1543a	N2	1289	104	2		wild_type	ERR16083421		This study
S. enterica	Napoli (predicted)	201605114		2016	France	France	Nouvelle-Aquitaine	33	33220	FRI12		Human	Stool	6	30	Male	3	Isolated	SAL_SA4063AA	SAL_DB8598AA_AS	5168	60	161	147	96	1085	155	12	142	140575	140575	140575	140575	140575	140575	140575	140575	140575	1543	1543a	N2	1289	104	2		wild_type	ERR16083422		This study
S. enterica	Napoli (predicted)	201605121		2016	France	France	Pays-de-la-Loire	85	85000	FRG05		Human	Stool	6	29	Female	79	Isolated	SAL_SA4062AA	SAL_DB8597AA_AS	474	60	161	147	96	178	155	12	142	140583	140583	140583	140583	124002	124002	27729	27729	27729	1543	1543a	N2	1289	104	2		wild_type	ERR16083423		This study
S. enterica	Napoli (predicted)	201605190		2016	France	France	Nouvelle-Aquitaine	87	87220	FRI23		Human	Stool	7	4	Male	83	Isolated	SAL_SA4064AA	SAL_DB8599AA_AS	474	60	161	147	96	178	155	12	142	140578	140578	140578	140578	140578	140578	27733	27733	27729	1543	1543a	N2	1289	104	2		wild_type	ERR16083424		This study
S. enterica	Napoli (predicted)	201605257		2016	France	France	Occitanie	82	82350	FRJ28		Human	Stool	7	6	Female	4		SAL_SA4266AA	SAL_DB8849AA_AS	5168	60	161	147	96	1085	155	12	142	140826	140826	140826	140826	140589	140589	140575	140575	140575	1543	1543a	N2	1289	104	2		wild_type	ERR16083425		This study
S. enterica	Napoli (predicted)	201605503		2016	France	France	Nouvelle-Aquitaine	33	33450	FRI12		Human	Stool	7	12	Male	2		SAL_SA4265AA	SAL_DB8848AA_AS	5168	60	161	147	96	1085	155	12	142	140821	140821	140821	140821	140821	140669	140575	140575	140575	1543	1543a	N2	1289	104	2		wild_type	ERR16083426		This study
S. enterica	Napoli (predicted)	201605727		2016	France	France	Provence-Alpes-Cote-dAzur	83	83400 (LAM)	FRL05		Human	Stool	7	16	Male	9	Isolated	SAL_SA4264AA	SAL_DB8847AA_AS	474	60	161	147	96	178	155	12	142	140819	140819	140819	140819	140819	140819	107035	24950	1543	1543	1543b	N2	1289	104	2		wild_type	ERR16083427		This study
S. enterica	Napoli (predicted)	201605799		2016	France	France	Grand-Est	10	10000	FRF22		Human	Stool	7	23	Male	< 1		SAL_SA4263AA	SAL_DB8846AA_AS	474	60	161	147	96	178	155	12	142	140814	140814	140814	140814	140814	140652	27729	27729	27729	1543	1543a	N2	1289	104	2		wild_type	ERR16083428		This study
S. enterica	Napoli (predicted)	201605885		2016	France	France	Occitanie	81	81380	FRJ27		Human	Stool	7	21	Male	2		SAL_SA4258AA	SAL_DB8841AA_AS	5168	60	161	147	96	1085	155	12	142	140770	140770	140770	140770	140770	140684	140575	140575	140575	1543	1543a	N2	1289	104	2		wild_type	ERR16083429		This study
S. enterica	Napoli (predicted)	201606010		2016	France	France	Nouvelle-Aquitaine	17	17000	FRI32		Human	Stool	7	25	Female	< 1	Isolated	SAL_SA4259AA	SAL_DB8842AA_AS	474	60	161	147	96	178	155	12	142	140781	140781	140781	140781	140781	140604	27729	27729	27729	1543	1543a	N2	1289	104	2		wild_type	ERR16083430		This study
S. enterica	Napoli (predicted)	201606118		2016	France		Provence-Alpes-Cote-dAzur	06	06240	FRL03		Human	Stool	7	30	Male	71	Isolated	SAL_SA4262AA	SAL_DB8844AA_AS	2019	60	161	147	348	178	155	12	142	140820	140789	140789	140789	140789	140789	20426	20426	7673	7673	7673	N1	1289	104	2		wild_type	ERR16083431		This study
S. enterica	Napoli (predicted)	201606126		2016	France	France	Pays-de-la-Loire	85	85925 (LAM)	FRG05		Human	Stool	7	30	Male	72	Isolated	SAL_SA4260AA	SAL_DB8845AA_AS	474	60	161	147	96	178	155	12	142	140790	140790	140790	140628	27733	27733	27733	27733	27729	1543	1543a	N2	1289	104	2		wild_type	ERR16083432		This study
S. enterica	Napoli (predicted)	201606199		2016	France	France	Pays-de-la-Loire	85	85025 (LAM)	FRG05		Human	Stool	7	30	Male	< 1	Isolated	SAL_SA4255AA	SAL_DB8838AA_AS	474	60	161	147	96	178	155	12	142	140760	140760	140760	140760	140760	140760	140587	27729	27729	1543	1543a	N2	1289	104	2		wild_type	ERR16083433		This study
S. enterica	Napoli (predicted)	201606260		2016	France	France	Pays-de-la-Loire	85	85925 (LAM)	FRG05		Human	Stool	7		Female	67		SAL_MB8020AA	SAL_VC2002AA_AS	474	60	161	147	96	178	155	12	142	312269	312269	312269	312269	27733	27733	27733	27733	27729	1543	1543a	N2	1289	104	2	blaCTX-M-1,aadA5,sul2,dfrA17	wild_type	ERR16083434		This study
S. enterica	Napoli (predicted)	201606271		2016	France	France	Pays-de-la-Loire	85	85300 (LAM)	FRG05		Human	Stool	8	5	Male	< 1	Isolated	SAL_SA4254AA	SAL_DB8837AA_AS	5173	60	161	147	96	1087	155	12	142	140759	140759	140759	140759	140759	140702	27733	27733	27729	1543	1543a	N2	1289	104	2		wild_type	ERR16083435		This study
S. enterica	Napoli (predicted)	201606375		2016	France	France	Bourgogne_Franche-Comté	21	21490	FRC11		Human	Stool	8	4	Female	< 1	Isolated	SAL_SA4257AA	SAL_DB8840AA_AS	474	60	161	147	96	178	155	12	142	140776	140776	140776	140776	140687	140655	27729	27729	27729	1543	1543a	N2	1289	104	2		wild_type	ERR16083436		This study
S. enterica	Napoli (predicted)	201606428		2016	France	France	Nouvelle-Aquitaine	16	16000 (LAM)	FRI31		Human	Stool	8	8	Male	39		SAL_SA4256AA	SAL_DB8839AA_AS	474	60	161	147	96	178	155	12	142	140775	140775	140775	140775	140604	140604	27729	27729	27729	1543	1543a	N2	1289	104	2		wild_type	ERR16083437		This study
S. enterica	Napoli (predicted)	201606463		2016	France	France	Ile-de-France	94	94300	FR107		Human	Stool	8	6	Male	3		SAL_SA4253AA	SAL_DB8836AA_AS	474	60	161	147	96	178	155	12	142	140758	140758	140758	140758	140758	140604	27729	27729	27729	1543	1543a	N2	1289	104	2		wild_type	ERR16083438		This study
S. enterica	Napoli (predicted)	201606537		2016	France	France	Pays-de-la-Loire	53	53015 (LAM)	FRG03		Human	Stool	8	9	Male	86		SAL_SA4251AA	SAL_DB8834AA_AS	474	60	161	147	96	178	155	12	142	140757	140757	140757	140757	140649	140611	27729	27729	27729	1543	1543a	N2	1289	104	2		wild_type	ERR16083439		This study
S. enterica	Napoli (predicted)	201606833		2016	France	France	Ile-de-France	92	92170	FR105		Human	Stool	8	16	Female	44		SAL_SA4252AA	SAL_DB8835AA_AS	5174	60	856	147	96	178	155	12	142	140754	140754	140754	140754	124002	124002	27729	27729	27729	1543	1543a	N2	1289	104	2		wild_type	ERR16083440		This study
S. enterica	Napoli (predicted)	201606834		2016	France	France	Pays-de-la-Loire	44	44420	FRG01		Human	Urine	8	13	Female	68		SAL_SA4250AA	SAL_DB8833AA_AS	474	60	161	147	96	178	155	12	142	140756	140756	140756	140756	27733	27733	27733	27733	27729	1543	1543a	N2	1289	104	2		wild_type	ERR16083441		This study
S. enterica	Napoli (predicted)	201607370		2016	France	Italy	Auvergne_Rhône-Alpes	73	73800	FRK27		Human	Blood	8	26	Male	21		SAL_SA4249AA	SAL_DB8832AA_AS	2095	60	161	147	151	178	155	12	142	140752	140752	140752	140752	140752	140752	140752	140752	1450	1450	1450	N1	1289	104	2		wild_type	ERR16083442		This study
S. enterica	Napoli (predicted)	201607404		2016	France	France	Pays-de-la-Loire	44	44130	FRG01		Human	Stool	8	27	Female	2	Isolated	SAL_SA4248AA	SAL_DB8831AA_AS	474	60	161	147	96	178	155	12	142	140753	140753	140753	27733	27733	27733	27733	27733	27729	1543	1543a	N2	1289	104	2		wild_type	ERR16083443		This study
S. enterica	Napoli (predicted)	201607494		2016	France	France	Pays-de-la-Loire	53	53100	FRG03		Human	Stool	8	31	Male	58		SAL_SA4246AA	SAL_DB8829AA_AS	474	60	161	147	96	178	155	12	142	140748	140748	140648	140648	140648	140611	27729	27729	27729	1543	1543a	N2	1289	104	2		wild_type	ERR16083444		This study
S. enterica	Napoli (predicted)	201607495		2016	France	France	Pays-de-la-Loire	53	53100	FRG03		Human	Stool	8	31	Female	51		SAL_SA4247AA	SAL_DB8830AA_AS	474	60	161	147	96	178	155	12	142	140751	140748	140648	140648	140648	140611	27729	27729	27729	1543	1543a	N2	1289	104	2		wild_type	ERR16083445		This study
S. enterica	Napoli (predicted)	201607604		2016	France	France	Bretagne	35	35580	FRH03		Human	Urine	9	3	Female	8		SAL_SA4244AA	SAL_DB8827AA_AS	474	60	161	147	96	178	155	12	142	140749	140749	140749	140749	140749	130700	27729	27729	27729	1543	1543a	N2	1289	104	2		wild_type	ERR16083446		This study
S. enterica	Napoli (predicted)	201607605		2016	France	France	Pays-de-la-Loire	53	53100	FRG03		Human	Stool	9	1	Female	24		SAL_SA4243AA	SAL_DB8826AA_AS	474	60	161	147	96	178	155	12	142	140748	140748	140648	140648	140648	140611	27729	27729	27729	1543	1543a	N2	1289	104	2		wild_type	ERR16083447		This study
S. enterica	Napoli (predicted)	201607932		2016	France	France	Nouvelle-Aquitaine	79	79000	FRI33		Human	Stool	8	30	Male	7		SAL_SA4242AA	SAL_DB8825AA_AS	474	60	161	147	96	178	155	12	142	140747	140747	140747	140747	140747	140747	27729	27729	27729	1543	1543a	N2	1289	104	2		wild_type	ERR16083448		This study
S. enterica	Napoli (predicted)	201608138		2016	France	France	Nouvelle-Aquitaine	17	17500	FRI32		Human	Stool	9	8	Female	17	Isolated	SAL_SA4245AA	SAL_DB8828AA_AS	474	60	161	147	96	178	155	12	142	140750	140750	140750	140750	140750	140591	27733	27733	27729	1543	1543a	N2	1289	104	2		wild_type	ERR16083449		This study
S. enterica	Napoli (predicted)	201608594		2016	France	France	Nouvelle-Aquitaine	79	79300 (LAM)	FRI33		Human	Stool	9	20	Male	84	Isolated	SAL_SA4240AA	SAL_DB8823AA_AS	474	60	161	147	96	178	155	12	142	140743	140743	140743	140743	140696	27729	27729	27729	27729	1543	1543a	N2	1289	104	2		wild_type	ERR16083450		This study
S. enterica	Napoli (predicted)	201608646		2016	France	France	Nouvelle-Aquitaine	33	33620	FRI12	No Travel declared	Human	Stool	9	20	Female	68	Isolated	SAL_SA4241AA	SAL_DB8824AA_AS	474	60	161	147	96	178	155	12	142	140744	140744	140744	140744	140742	140702	27733	27733	27729	1543	1543a	N2	1289	104	2		wild_type	ERR16083451		This study
S. enterica	Napoli (predicted)	201608983		2016	France	France	Nouvelle-Aquitaine	17	17108 (LAM	FRI32		Human	Stool	9	25	Female	5	Isolated	SAL_SA4239AA	SAL_DB8822AA_AS	474	60	161	147	96	178	155	12	142	140746	140746	140746	140746	140746	140653	27733	27733	27729	1543	1543a	N2	1289	104	2		wild_type	ERR16083452		This study
S. enterica	Napoli (predicted)	201609016		2016	France	France	Pays-de-la-Loire	44	44110	FRG01	No Travel declared	Human	Stool	9	22	Male	2	Isolated	SAL_SA4238AA	SAL_DB8821AA_AS	474	60	161	147	96	178	155	12	142	140741	140741	140741	140741	140741	140616	140616	27729	27729	1543	1543a	N2	1289	104	2		wild_type	ERR16083453		This study
S. enterica	Napoli (predicted)	201609522		2016	France	France	Nouvelle-Aquitaine	86	86021 (LAM)	FRI34		Human	Stool	10	10	Male	74	Isolated	SAL_SA4237AA	SAL_DB8820AA_AS	474	60	161	147	96	178	155	12	142	140745	140745	140745	140745	140745	140611	27729	27729	27729	1543	1543a	N2	1289	104	2		wild_type	ERR16083454		This study
S. enterica	Napoli (predicted)	201609560		2016	France	France	Nouvelle-Aquitaine	33	33240	FRI12		Human	Stool	10	5	Female	7		SAL_SA4236AA	SAL_DB8819AA_AS	474	60	161	147	96	178	155	12	142	140742	140742	140742	140742	140742	140702	27733	27733	27729	1543	1543a	N2	1289	104	2		wild_type	ERR16083455		This study
S. enterica	Napoli (predicted)	201609661		2016	France	France	Nouvelle-Aquitaine	16	16290	FRI31		Human	Stool	10	13	Female	80		SAL_SA4233AA	SAL_DB8816AA_AS	474	60	161	147	96	178	155	12	142	140737	140737	140737	140737	140737	140713	27733	27733	27729	1543	1543a	N2	1289	104	2		wild_type	ERR16083456		This study
S. enterica	Napoli (predicted)	201611155		2016	France	France	Nouvelle-Aquitaine	19	19190	FRI21		Human	Urine	11	30	Female	94		SAL_SA4234AA	SAL_DB8817AA_AS	474	60	161	147	96	178	155	12	142	140740	140740	140740	140740	140740	140740	140740	140588	140575	1543	1543a	N2	1289	104	2		wild_type	ERR16083457		This study
S. enterica	Napoli (predicted)	201611259		2016	France	France	Pays-de-la-Loire	85	85340	FRG05		Human	Stool	12	1	Male	22	Isolated	SAL_SA4232AA	SAL_DB8815AA_AS	474	60	161	147	96	178	155	12	142	140732	140732	140732	140732	140732	140643	27729	27729	27729	1543	1543a	N2	1289	104	2		wild_type	ERR16083458		This study
S. enterica	Napoli (predicted)	A_17-0823	S17LNR0823	2017	France	France	Nouvelle-Aquitaine	79		FRI33		Environment	Poultry	7	26				SAL_HB8064AA	SAL_PC3104AA_AS	474	60	161	147	96	178	155	12	142	264020	264020	204865	204865	140696	27729	27729	27729	27729	1543	1543a	N2	1289	104	2		wild_type	ERR16061006		This study
S. enterica	Napoli (predicted)	A_17-0907	S17LNR0907	2017	France	France	Pays-de-la-Loire	85		FRG05		Environment	Poultry	7	26				SAL_HB8055AA	SAL_PC3095AA_AS	474	60	161	147	96	178	155	12	142	264001	264001	264001	264001	264001	264001	27729	27729	27729	1543	1543a	N2	1289	104	2		wild_type	ERR16061007		This study
S. enterica	Napoli (predicted)	A_17-1314	S17LNR1314	2017	France	France	Bretagne	56		FRH04		Environment	Poultry	10	23				SAL_HB8066AA	SAL_PC3106AA_AS	474	60	161	147	96	178	155	12	142	264006	264006	264006	264006	140734	140653	27733	27733	27729	1543	1543a	N2	1289	104	2		wild_type	ERR16061008		This study
S. enterica	Napoli (predicted)	A_17-1406	S17LNR1406	2017	France	France	Pays-de-la-Loire	72		FRG04		Environment	Poultry	11	22				SAL_HB8067AA	SAL_PC3107AA_AS	474	60	161	147	96	178	155	12	142	264033	264033	264033	264033	264033	140605	27729	27729	27729	1543	1543a	N2	1289	104	2		wild_type	ERR16061009		This study
S. enterica	Napoli (predicted)	A_17-1647	S17LNR1647	2017	France	France	Centre_Val-de-Loire	37		FRB04		Environment	Poultry	10	12				SAL_HB8070AA	SAL_PC3110AA_AS	474	60	161	147	96	178	155	12	142	264009	264009	264009	264009	264009	140611	27729	27729	27729	1543	1543a	N2	1289	104	2		wild_type	ERR16061010		This study
S. enterica	Napoli (predicted)	A_17-1680	S17LNR1680	2017	France	France	Pays-de-la-Loire	44		FRG01		Environment	Poultry	11	6				SAL_HB8065AA	SAL_PC3105AA_AS	474	60	161	147	96	178	155	12	142	264004	264004	264004	264004	176312	176312	140587	27729	27729	1543	1543a	N2	1289	104	2		wild_type	ERR16061011		This study
S. enterica	Napoli (predicted)	A_17-1715	S17LNR1715	2017	France	France	Pays-de-la-Loire	85		FRG05		Environment	Poultry	11	28				SAL_HB8069AA	SAL_PC3109AA_AS	474	60	161	147	96	178	155	12	142	264007	264007	264007	140665	140665	140604	27729	27729	27729	1543	1543a	N2	1289	104	2		wild_type	ERR16061012		This study
S. enterica	Napoli (predicted)	A_17-1859	S17LNR1859	2017	France	France	Bretagne	35		FRH03		Environment	Poultry	8	29				SAL_HB8068AA	SAL_PC3108AA_AS	474	60	161	147	96	178	155	12	142	264032	264032	264032	241999	204671	140611	27729	27729	27729	1543	1543a	N2	1289	104	2		wild_type	ERR16061013		This study
S. enterica	Napoli (predicted)	201700593		2017	France	France	Occitanie	82	82000	FRJ28		Human	Stool	12	5	Male	72	Isolated	SAL_SA4073AA	SAL_DB8608AA_AS	5168	60	161	147	96	1085	155	12	142	140589	140589	140589	140589	140589	140589	140575	140575	140575	1543	1543a	N2	1289	104	2		wild_type	ERR16083529		This study
S. enterica	Napoli (predicted)	201701117		2017	France	France	Nouvelle-Aquitaine	16	16300	FRI31		Human	Blood	12	23	Male	84	Isolated	SAL_SA4235AA	SAL_DB8818AA_AS	474	60	161	147	96	178	155	12	142	140738	140738	140738	140738	140738	140738	27733	27733	27729	1543	1543a	N2	1289	104	2		wild_type	ERR16083459		This study
S. enterica	Napoli (predicted)	201702417		2017	France	France	Nouvelle-Aquitaine	16	16380	FRI31		Human	Stool	3	21	Male	8		SAL_SA4231AA	SAL_DB8814AA_AS	474	60	161	147	96	178	155	12	142	140734	140734	140734	140734	140734	140653	27733	27733	27729	1543	1543a	N2	1289	104	2		wild_type	ERR16083460		This study
S. enterica	Napoli (predicted)	201702925		2017	France	France	Nouvelle-Aquitaine	24	24470	FRI11		Human	Stool	4	12	Female	5		SAL_SA4230AA	SAL_DB8813AA_AS	474	60	161	147	96	178	155	12	142	140736	140736	140736	140736	140736	140736	27733	27733	27729	1543	1543a	N2	1289	104	2		wild_type	ERR16083461		This study
S. enterica	Napoli (predicted)	201703429		2017	France	France	Centre_Val-de-Loire	37	37240	FRB04		Human	Stool	4	30	Male	< 1	Isolated	SAL_SA4067AA	SAL_DB8602AA_AS	5168	60	161	147	96	1085	155	12	142	140579	140579	140579	140579	140579	140579	140579	140575	140575	1543	1543a	N2	1289	104	2		wild_type	ERR16083462		This study
S. enterica	Napoli (predicted)	201704228		2017	France	France	Bourgogne_Franche-Comté	90	90300	FRC24		Human	Stool	5	31	Male	12	Isolated	SAL_SA4227AA	SAL_DB8810AA_AS	474	60	161	147	96	178	155	12	142	140733	140733	140733	140733	140601	107128	97218	24950	1543	1543	1543b	N2	1289	104	2	blaTEM-1	wild_type	ERR16083463		This study
S. enterica	Napoli (predicted)	201704230		2017	France	France	Occitanie	65	65013 (LAM)	FRJ26		Human	Blood	5	31	Male	74		SAL_SA4228AA	SAL_DB8811AA_AS	474	60	161	147	96	178	155	12	142	140731	140731	140731	140603	124002	124002	27729	27729	27729	1543	1543a	N2	1289	104	2		wild_type	ERR16083464		This study
S. enterica	Napoli (predicted)	201704288		2017	France	France	Nouvelle-Aquitaine	24	24800	FRI11		Human	Stool	5	28	Male	< 1	Isolated	SAL_SA4229AA	SAL_DB8812AA_AS	474	60	161	147	96	178	155	12	142	140735	140735	140735	140735	140735	140702	27733	27733	27729	1543	1543a	N2	1289	104	2		wild_type	ERR16083465		This study
S. enterica	Napoli (predicted)	201704516		2017	France	France	Hauts-de-France	59	59710	FRE11		Human	Stool	6	10	Female	2		SAL_SA4226AA	SAL_DB8809AA_AS	474	60	161	147	96	178	155	12	142	140730	140730	140730	140730	140729	140729	27729	27729	27729	1543	1543a	N2	1289	104	2		wild_type	ERR16083466		This study
S. enterica	Napoli (predicted)	201704536		2017	France	France	Pays-de-la-Loire	85	85290 (LAM)	FRG05		Human	Stool	6	9	Male	11	Isolated	SAL_SA4225AA	SAL_DB8808AA_AS	474	60	161	147	96	178	155	12	142	140729	140729	140729	140729	140729	140729	27729	27729	27729	1543	1543a	N2	1289	104	2		wild_type	ERR16083467		This study
S. enterica	Napoli (predicted)	201704560		2017	France	France	Provence-Alpes-Cote-dAzur	06	06730	FRL03		Human	Stool	6	12	Male	2		SAL_SA4224AA	SAL_DB8807AA_AS	474	60	161	147	96	178	155	12	142	140727	140727	140727	140727	140727	140577	26263	24950	1543	1543	1543b	N2	1289	104	2		wild_type	ERR16083468		This study
S. enterica	Napoli (predicted)	201704617		2017	France	France	Nouvelle-Aquitaine	47	47300	FRI14		Human	Stool	6	10	Male	1		SAL_SA4223AA	SAL_DB8806AA_AS	474	60	161	147	96	178	155	12	142	140728	140728	140728	140728	140728	27733	27733	27733	27729	1543	1543a	N2	1289	104	2		wild_type	ERR16083469		This study
S. enterica	Napoli (predicted)	201704635		2017	France	France	Pays-de-la-Loire	44	44390	FRG01		Human	Stool	6	10	Male	2	Isolated	SAL_SA4221AA	SAL_DB8804AA_AS	474	60	161	147	96	178	155	12	142	140723	140723	140723	140603	124002	124002	27729	27729	27729	1543	1543a	N2	1289	104	2		wild_type	ERR16083470		This study
S. enterica	Napoli (predicted)	201704728		2017	France	France	Pays-de-la-Loire	85	85300	FRG05		Human	Stool	6	6	Female	74	Isolated	SAL_SA4219AA	SAL_DB8802AA_AS	474	60	161	147	96	178	155	12	142	140721	140721	140721	140715	140687	140655	27729	27729	27729	1543	1543a	N2	1289	104	2		wild_type	ERR16083471		This study
S. enterica	Napoli (predicted)	201704762		2017	France	France	Nouvelle-Aquitaine	86	86021 (LAM)	FRI34		Human	Urine	6	15	Female	71		SAL_SA4220AA	SAL_DB8803AA_AS	474	60	161	147	96	178	155	12	142	140722	140722	140722	140722	140722	140722	27729	27729	27729	1543	1543a	N2	1289	104	2		wild_type	ERR16083472		This study
S. enterica	Napoli (predicted)	201704771		2017	France	France	Bretagne	22		FRH01		Human	Stool	6	14	Male	1		SAL_SA4222AA	SAL_DB8805AA_AS	474	60	161	147	96	178	155	12	142	140725	140725	140725	140725	140725	107128	97218	24950	1543	1543	1543b	N2	1289	104	2		wild_type	ERR16083473		This study
S. enterica	Napoli (predicted)	201704795		2017	France	France	Pays-de-la-Loire	44	44310	FRG01	No Travel declared	Human	Stool	6	9	Male	3		SAL_SA4217AA	SAL_DB8800AA_AS	474	60	161	147	96	178	155	12	142	140724	140724	140724	140724	140724	140709	27729	27729	27729	1543	1543a	N2	1289	104	2	tet(A)	wild_type	ERR16083474		This study
S. enterica	Napoli (predicted)	201704807		2017	France	France	Pays-de-la-Loire	44	44300	FRG01		Human	Blood	6	18	Male	68		SAL_SA4218AA	SAL_DB8801AA_AS	474	60	161	147	96	178	155	12	142	140726	140726	140726	140726	124002	124002	27729	27729	27729	1543	1543a	N2	1289	104	2		wild_type	ERR16083475		This study
S. enterica	Napoli (predicted)	201704846		2017	France	France	Pays-de-la-Loire	44	44600 (LAM)	FRG01		Human	Urine	6	20	Female	27		SAL_SA4215AA	SAL_DB8798AA_AS	474	60	161	147	96	178	155	12	142	140719	140719	140719	140719	140651	27733	27733	27733	27729	1543	1543a	N2	1289	104	2		wild_type	ERR16083476		This study
S. enterica	Napoli (predicted)	201704854		2017	France	France	Provence-Alpes-Cote-dAzur	06	06202 (LAM)	FRL03		Human	Stool	6	19	Female	7	Isolated	SAL_SA4216AA	SAL_DB8799AA_AS	474	60	161	147	96	178	155	12	142	140720	140720	140720	140720	140720	140577	26263	24950	1543	1543	1543b	N2	1289	104	2		wild_type	ERR16083477		This study
S. enterica	Napoli (predicted)	201704882		2017	France	France	Pays-de-la-Loire	85	85700	FRG05		Human	Stool	6	15	Female	25		SAL_SA4213AA	SAL_DB8796AA_AS	474	60	161	147	96	178	155	12	142	140716	140716	140716	140716	140716	140716	27729	27729	27729	1543	1543a	N2	1289	104	2		wild_type	ERR16083478		This study
S. enterica	Napoli (predicted)	201704895		2017	Monaco	France	Monaco	98		FRL03		Human	Stool	6	18	Female	82	Isolated	SAL_SA4211AA	SAL_DB8794AA_AS	474	60	161	147	96	178	155	12	142	140714	140714	140714	140714	140714	140577	26263	24950	1543	1543	1543b	N2	1289	104	2		wild_type	ERR16083479		This study
S. enterica	Napoli (predicted)	201704912		2017	France	France	Occitanie	46	46190	FRJ25		Human	Stool	6	16	Female	58		SAL_SA4210AA	SAL_DB8793AA_AS	474	60	161	147	96	178	155	12	142	140712	140712	140712	140712	140602	140602	140588	140588	140575	1543	1543a	N2	1289	104	2		wild_type	ERR16083480		This study
S. enterica	Napoli (predicted)	201705012		2017	France	France	Nouvelle-Aquitaine	17	17520	FRI32		Human	Stool	6	13	Male	39	Isolated	SAL_SA4212AA	SAL_DB8795AA_AS	474	60	161	147	96	178	155	12	142	140718	140718	140718	140718	140718	140659	27733	27733	27729	1543	1543a	N2	1289	104	2		wild_type	ERR16083481		This study
S. enterica	Napoli (predicted)	201705110		2017	France	France	Provence-Alpes-Cote-dAzur	06	06300 (LAM)	FRL03		Human	Stool	6	28	Male	10		SAL_SA4214AA	SAL_DB8797AA_AS	474	60	161	147	96	178	155	12	142	140717	140717	140717	140717	140717	140577	26263	24950	1543	1543	1543b	N2	1289	104	2		wild_type	ERR16083482		This study
S. enterica	Napoli (predicted)	201705171		2017	France	France	Pays-de-la-Loire	49	49325 (LAM)	FRG02		Human	Stool	6	28	Female	72	Isolated	SAL_SA4209AA	SAL_DB8792AA_AS	474	60	161	147	96	178	155	12	142	140711	140711	140711	140711	124002	124002	27729	27729	27729	1543	1543a	N2	1289	104	2		wild_type	ERR16083483		This study
S. enterica	Napoli (predicted)	201705175		2017	France	France	Pays-de-la-Loire	85	85150	FRG05	Travel_to_Norway	Human	Stool	6	29	Male	3		SAL_SA4207AA	SAL_DB8790AA_AS	474	60	161	147	96	178	155	12	142	140709	140709	140709	140709	140709	140709	27729	27729	27729	1543	1543a	N2	1289	104	2		wild_type	ERR16083484		This study
S. enterica	Napoli (predicted)	201705198		2017	France	France	Nouvelle-Aquitaine	16	16300	FRI31		Human	Stool	6	29	Male	< 1	Isolated	SAL_SA4208AA	SAL_DB8791AA_AS	474	60	161	147	96	178	155	12	142	140713	140713	140713	140713	140713	140713	27733	27733	27729	1543	1543a	N2	1289	104	2		wild_type	ERR16083485		This study
S. enterica	Napoli (predicted)	201705235		2017	France	France	Pays-de-la-Loire	85	85300	FRG05		Human	Stool	6	30	Male	81		SAL_SA4206AA	SAL_DB8789AA_AS	474	60	161	147	96	178	155	12	142	140715	140715	140715	140715	140687	140655	27729	27729	27729	1543	1543a	N2	1289	104	2		wild_type	ERR16083486		This study
S. enterica	Napoli (predicted)	201705258		2017	France	France	Nouvelle-Aquitaine	17	17220	FRI32		Human	Stool	7	1	Female	< 1	Isolated	SAL_SA4205AA	SAL_DB8788AA_AS	5170	60	161	781	96	178	155	12	142	140710	140710	140706	140706	140706	140706	140623	140623	27729	1543	1543a	N2	1289	104	2		wild_type	ERR16083487		This study
S. enterica	Napoli (predicted)	201705294		2017	France	France	Pays-de-la-Loire	44	44420	FRG01	No Travel declared	Human	Stool	6	30	Male	19	Isolated	SAL_SA4204AA	SAL_DB8787AA_AS	474	60	161	147	96	178	155	12	142	140704	140704	140704	140704	140699	27733	27733	27733	27729	1543	1543a	N2	1289	104	2	blaTEM-135,aadA1,aadA2,sul3,dfrA12,tet(A),cmlA1	wild_type	ERR16083488		This study
S. enterica	Napoli (predicted)	201705330		2017	France	France	Pays-de-la-Loire	44	44340	FRG01		Human	Stool	6	30	Male	1		SAL_SA4203AA	SAL_DB8786AA_AS	474	60	161	147	96	178	155	12	142	140705	140705	140705	140705	140701	124002	27729	27729	27729	1543	1543a	N2	1289	104	2		wild_type	ERR16083489		This study
S. enterica	Napoli (predicted)	201705351		2017	France	France	Pays-de-la-Loire	44	44150	FRG01	No Travel declared	Human	Stool	7	4	Male	66	Isolated	SAL_SA4199AA	SAL_DB8782AA_AS	474	60	161	147	96	178	155	12	142	140701	140701	140701	140701	140701	124002	27729	27729	27729	1543	1543a	N2	1289	104	2		wild_type	ERR16083491		This study
S. enterica	Napoli (predicted)	201705461		2017	France	France	Nouvelle-Aquitaine	33	33611	FRI12	No Travel declared	Human	Stool	7	10	Female	13	Isolated	SAL_SA4200AA	SAL_DB8783AA_AS	474	60	161	147	96	178	155	12	142	140703	140703	131168	131168	124002	124002	27729	27729	27729	1543	1543a	N2	1289	104	2		wild_type	ERR16083492		This study
S. enterica	Napoli (predicted)	201705601		2017	France	France	Pays-de-la-Loire	85	85530	FRG05		Human	Stool	7	15	Male	< 1		SAL_SA4202AA	SAL_DB8785AA_AS	474	60	161	147	96	178	155	12	142	140708	140708	140708	140708	124002	124002	27729	27729	27729	1543	1543a	N2	1289	104	2		wild_type	ERR16083493		This study
S. enterica	Napoli (predicted)	201705602		2017	France	France	Pays-de-la-Loire	49	49110	FRG02		Human	Stool	7	15	Male	65		SAL_SA4198AA	SAL_DB8781AA_AS	474	60	161	147	96	178	155	12	142	140707	140707	140707	140681	124002	124002	27729	27729	27729	1543	1543a	N2	1289	104	2		wild_type	ERR16083494		This study
S. enterica	Napoli (predicted)	201705627		2017	France	France	Occitanie	12	12072 do not exist	FRJ22		Human	Stool	7	12	Male	83		SAL_SA4197AA	SAL_DB8780AA_AS	5173	60	161	147	96	1087	155	12	142	140702	140702	140702	140702	140702	140702	27733	27733	27729	1543	1543a	N2	1289	104	2		wild_type	ERR16083495		This study
S. enterica	Napoli (predicted)	201705673		2017	France	France	Bourgogne_Franche-Comté	70	70100	FRC23		Human	Stool	7	17	Male	3	Isolated	SAL_SA4196AA	SAL_DB8779AA_AS	474	60	161	147	96	178	155	12	142	140699	140699	140699	140699	140699	27733	27733	27733	27729	1543	1543a	N2	1289	104	2		wild_type	ERR16083496		This study
S. enterica	Napoli (predicted)	201705737		2017	France	France	Nouvelle-Aquitaine	16	16290	FRI31		Human	Stool	7	18	Male	7		SAL_SA4194AA	SAL_DB8777AA_AS	474	60	161	147	96	178	155	12	142	140698	140698	140698	140698	140698	140621	27733	27733	27729	1543	1543a	N2	1289	104	2		wild_type	ERR16083497		This study
S. enterica	Napoli (predicted)	201705825		2017	France	France	Pays-de-la-Loire	85	85100	FRG05		Human	Stool	7	11	Female	15		SAL_SA4195AA	SAL_DB8778AA_AS	474	60	161	147	96	178	155	12	142	140700	140700	140700	140700	124002	124002	27729	27729	27729	1543	1543a	N2	1289	104	2		wild_type	ERR16083498		This study
S. enterica	Napoli (predicted)	201705848		2017	France	France	Occitanie	31	31600 (LAM)	FRJ23		Human	Stool	7	22	Male	32		SAL_SA4192AA	SAL_DB8775AA_AS	474	60	161	147	96	178	155	12	142	140696	140696	140696	140696	140696	27729	27729	27729	27729	1543	1543a	N2	1289	104	2		wild_type	ERR16083499		This study
S. enterica	Napoli (predicted)	201705858		2017	France	France	Grand-Est	68	68300	FRF12		Human	Stool	7	22	Male	1		SAL_SA4189AA	SAL_DB8772AA_AS	474	60	161	147	96	178	155	12	142	140695	140695	140695	140695	140601	107128	97218	24950	1543	1543	1543b	N2	1289	104	2		wild_type	ERR16083500		This study
S. enterica	Napoli (predicted)	201705920		2017	France	France	Nouvelle-Aquitaine	79	79000	FRI33		Human	Stool	7	22	Male	4		SAL_SA4190AA	SAL_DB8774AA_AS	474	60	161	147	96	178	155	12	142	140697	140697	140697	140697	140697	140655	27729	27729	27729	1543	1543a	N2	1289	104	2		wild_type	ERR16083501		This study
S. enterica	Napoli (predicted)	201705977		2017	France	France	Nouvelle-Aquitaine	86	86021 (LAM)	FRI34		Human	Blood	7	18	Female	52	Isolated	SAL_SA4186AA	SAL_DB8770AA_AS	474	60	161	147	96	178	155	12	142	140694	140694	140667	140667	140667	140611	27729	27729	27729	1543	1543a	N2	1289	104	2		wild_type	ERR16083502		This study
S. enterica	Napoli (predicted)	201706005		2017	France	France	Pays-de-la-Loire	85	85160	FRG05		Human	Blood	7	20	Female	86		SAL_SA4187AA	SAL_DB8769AA_AS	474	60	161	147	96	178	155	12	142	140693	140693	140693	140587	140587	140587	140587	27729	27729	1543	1543a	N2	1289	104	2		wild_type	ERR16083503		This study
S. enterica	Napoli (predicted)	201706053		2017	France	France	Pays-de-la-Loire	85	85440	FRG05		Human	Stool	7	24	Female	63	Isolated	SAL_SA4184AA	SAL_DB8767AA_AS	474	60	161	147	96	178	155	12	142	140690	140690	140690	140690	140690	140690	27729	27729	27729	1543	1543a	N2	1289	104	2		wild_type	ERR16083504		This study
S. enterica	Napoli (predicted)	201706242		2017	France	France	Pays-de-la-Loire	44	44160	FRG01		Human	Stool	7	26	Male	5		SAL_SA4185AA	SAL_DB8768AA_AS	474	60	161	147	96	178	155	12	142	140689	140689	140689	140689	140689	27733	27733	27733	27729	1543	1543a	N2	1289	104	2		wild_type	ERR16083505		This study
S. enterica	Napoli (predicted)	201706292		2017	France	France	Pays-de-la-Loire	85	85140	FRG05	No Travel declared	Human	Stool	7	26	Female	3	Isolated	SAL_SA4181AA	SAL_DB8764AA_AS	474	60	161	147	96	178	155	12	142	140692	140692	140692	140687	140687	140655	27729	27729	27729	1543	1543a	N2	1289	104	2		wild_type	ERR16083506		This study
S. enterica	Napoli (predicted)	201706954		2017	France	France	Normandie	50	50300 (LAM)	FRD12	No Travel declared	Human	Stool	8	12	Male	76	Isolated	SAL_SA4183AA	SAL_DB8766AA_AS	474	60	161	147	96	178	155	12	142	140688	140688	140688	140688	140688	140611	27729	27729	27729	1543	1543a	N2	1289	104	2		wild_type	ERR16083507		This study
S. enterica	Napoli (predicted)	201707043		2017	France	France	Bretagne	35	35131	FRH03		Human	Stool	8	9	Female	70	Isolated	SAL_SA4180AA	SAL_DB8763AA_AS	474	60	161	147	96	178	155	12	142	140687	140687	140687	140687	140687	140655	27729	27729	27729	1543	1543a	N2	1289	104	2		wild_type	ERR16083509		This study
S. enterica	Napoli (predicted)	201707066		2017	France	France	Pays-de-la-Loire	44	44250	FRG01		Human	Stool	8	8	Female	1		SAL_SA4178AA	SAL_DB8761AA_AS	474	60	161	147	96	178	155	12	142	140685	140685	140685	140685	140685	27733	27733	27733	27729	1543	1543a	N2	1289	104	2		wild_type	ERR16083510		This study
S. enterica	Napoli (predicted)	201707143	ISS_Salm201707143	2017	France	Italy	Auvergne_Rhône-Alpes	01	01390		Travel_to_Italy;sea food	Human	Stool	8	11	Female	19	Isolated	SAL_SA4179AA	SAL_DB8762AA_AS	2095	60	161	147	151	178	155	12	142	140683	140683	140683	140683	107045	1450	1450	1450	1450	1450	1450	N1	1289	104	2		wild_type	ERR16083511		This study
S. enterica	Napoli (predicted)	201707582		2017	France	France	Nouvelle-Aquitaine	79	79180	FRI33		Human	Stool	8	26	Male	82	Isolated	SAL_SA4174AA	SAL_DB8757AA_AS	474	60	161	147	96	178	155	12	142	140678	140678	140678	140678	140678	140611	27729	27729	27729	1543	1543a	N2	1289	104	2		wild_type	ERR16083513		This study
S. enterica	Napoli (predicted)	201708254		2017	France	France	Pays-de-la-Loire	44	44720	FRG01	No Travel declared	Human	Stool	8	31	Female	< 1	Isolated	SAL_SA4175AA	SAL_DB8758AA_AS	474	60	161	147	96	178	155	12	142	140679	140679	140679	140679	140679	27733	27733	27733	27729	1543	1543a	N2	1289	104	2		wild_type	ERR16083515		This study
S. enterica	Napoli (predicted)	201708281		2017	France	France	Nouvelle-Aquitaine	79	79180	FRI33		Human	Stool	8	31	Female	< 1		SAL_SA4173AA	SAL_DB8756AA_AS	474	60	161	147	96	178	155	12	142	140680	140680	140680	140680	140655	140655	27729	27729	27729	1543	1543a	N2	1289	104	2		wild_type	ERR16083516		This study
S. enterica	Napoli (predicted)	201708296		2017	France	France	Pays-de-la-Loire	49	49000	FRG02		Human	Stool	8	30	Male	79	Isolated	SAL_SA4170AA	SAL_DB8752AA_AS	474	60	161	147	96	178	155	12	142	140674	140674	140674	140674	140611	140611	27729	27729	27729	1543	1543a	N2	1289	104	2		wild_type	ERR16083517		This study
S. enterica	Napoli (predicted)	201708436		2017	France	France	Hauts-de-France	60	60240	FRE22		Human	Stool	9	4	Male	1	Isolated	SAL_SA4169AA	SAL_DB8751AA_AS	474	60	161	147	96	178	155	12	142	140686	140686	140686	140686	140686	140686	27729	27729	27729	1543	1543a	N2	1289	104	2		wild_type	ERR16083518		This study
S. enterica	Napoli (predicted)	201708965		2017	France	France	Pays-de-la-Loire	49	49400	FRG02		Human	Stool	9	13	Female	4		SAL_SA4172AA	SAL_DB8755AA_AS	474	60	161	147	96	178	155	12	142	140681	140681	140681	140681	124002	124002	27729	27729	27729	1543	1543a	N2	1289	104	2		wild_type	ERR16083519		This study
S. enterica	Napoli (predicted)	201709426		2017	France	France	Pays-de-la-Loire	85	85770	FRG05		Human	Stool	9	21	Male	< 1		SAL_SA4167AA	SAL_DB8750AA_AS	474	60	161	147	96	178	155	12	142	140671	140671	140671	140671	140671	140650	27729	27729	27729	1543	1543a	N2	1289	104	2		wild_type	ERR16083520		This study
S. enterica	Napoli (predicted)	201709481		2017	France	France	Pays-de-la-Loire	49	49250	FRG02		Human	Stool	9	13	Male	5		SAL_SA4168AA	SAL_DB8753AA_AS	474	60	161	147	96	178	155	12	142	140677	140677	140677	140677	140677	124002	27729	27729	27729	1543	1543a	N2	1289	104	2		wild_type	ERR16083521		This study
S. enterica	Napoli (predicted)	201709635		2017	France	France	Bretagne	56	56130	FRH04		Human	Stool	9	22	Female	1	Isolated	SAL_SA4166AA	SAL_DB8701AA_AS	474	60	161	147	96	178	155	12	142	140670	140670	140670	140670	27733	27733	27733	27733	27729	1543	1543a	N2	1289	104	2		wild_type	ERR16083522		This study
S. enterica	Napoli (predicted)	201710715		2017	France	Italy	Nouvelle-Aquitaine	87	87000	FRI23	No Travel declared	Human	Stool	10	24	Male	30	Isolated	SAL_SA4164AA	SAL_DB8699AA_AS	2008	60	161	147	348	178	155	436	142	140672	140672	140672	140672	25000	20403	20403	7673	7673	7673	7673	N1	1289	104	2	blaTEM-1,aadA1,sul1,dfrA1,tet(A)	wild_type	ERR16083525		This study
S. enterica	Napoli (predicted)	201711127		2017	France	France	Nouvelle-Aquitaine	24	24470	FRI11		Human	Stool	11	11	Female	86	Isolated	SAL_SA4162AA	SAL_DB8697AA_AS	474	60	161	147	96	178	155	12	142	140668	140668	140668	140668	140668	140668	27733	27733	27729	1543	1543a	N2	1289	104	2		wild_type	ERR16083526		This study
S. enterica	Napoli (predicted)	201711197		2017	France	France	Pays-de-la-Loire	49	49325 (LAM)	FRG02		Human	Stool	11	14	Female	< 1		SAL_SA4156AA	SAL_DB8691AA_AS	474	60	161	147	96	178	155	12	142	140665	140665	140665	140665	140665	140604	27729	27729	27729	1543	1543a	N2	1289	104	2		wild_type	ERR16083527		This study
S. enterica	Napoli (predicted)	201711384		2017	France	France	Nouvelle-Aquitaine	86	86410	FRI34	No Travel declared	Human	Urine	11	20	Male	80	Isolated	SAL_SA4159AA	SAL_DB8694AA_AS	474	60	161	147	96	178	155	12	142	140667	140667	140667	140667	140667	140611	27729	27729	27729	1543	1543a	N2	1289	104	2		wild_type	ERR16083528		This study
S. enterica	Napoli (predicted)	A_18-0577	S18LNR0577	2018	France	France	Pays-de-la-Loire	53		FRG03		Environment	Poultry	6	5				SAL_HB8073AA	SAL_PC3113AA_AS	474	60	161	147	96	178	155	12	142	264039	264039	264039	264039	140649	140611	27729	27729	27729	1543	1543a	N2	1289	104	2		wild_type	ERR16061014		This study
S. enterica	Napoli (predicted)	A_18-0666	S18LNR0666	2018	France	France	Bretagne	56		FRH04		Environment	Poultry	6	5				SAL_HB8079AA	SAL_PC3119AA_AS	474	60	161	147	96	178	155	12	142	264008	264008	264008	264008	264008	27733	27733	27733	27729	1543	1543a	N2	1289	104	2		wild_type	ERR16061015		This study
S. enterica	Napoli (predicted)	A_18-0829	S18LNR0829	2018	France	France	Pays-de-la-Loire	85		FRG05		Environment	Poultry	7	12				SAL_HB8077AA	SAL_PC3117AA_AS	474	60	161	147	96	178	155	12	142	264010	264010	264010	264010	264010	140709	27729	27729	27729	1543	1543a	N2	1289	104	2		wild_type	ERR16061016		This study
S. enterica	Napoli (predicted)	A_18-0859	S18LNR0859	2018	France	France	Pays-de-la-Loire	85		FRG05		Environment	Poultry	9	16				SAL_HB8076AA	SAL_PC3116AA_AS	8535	60	161	147	96	178	155	12	1363	264040	264040	264040	264040	264040	140597	27729	27729	27729	1543	1543a	N2	1289	104	2		wild_type	ERR16061017		This study
S. enterica	Napoli (predicted)	A_18-0890	S18LNR0890	2018	France	France	Nouvelle-Aquitaine	79		FRI33		Environment	Poultry	9	3				SAL_HB8082AA	SAL_PC3122AA_AS	474	60	161	147	96	178	155	12	142	264034	264034	264034	264034	264034	27729	27729	27729	27729	1543	1543a	N2	1289	104	2		wild_type	ERR16061018		This study
S. enterica	Napoli (predicted)	A_18-0906	S18LNR0906	2018	France	France	Pays-de-la-Loire	49		FRG02		Environment	Poultry	8	22				SAL_HB8084AA	SAL_PC3124AA_AS	474	60	161	147	96	178	155	12	142	264016	264016	264016	264016	124002	124002	27729	27729	27729	1543	1543a	N2	1289	104	2		wild_type	ERR16061019		This study
S. enterica	Napoli (predicted)	A_18-1634	S18LNR1634	2018	France	France	Pays-de-la-Loire	72		FRG04		Environment	Poultry	10	2				SAL_HB8089AA	SAL_PC3129AA_AS	474	60	161	147	96	178	155	12	142	264017	264017	264017	140641	27733	27733	27733	27733	27729	1543	1543a	N2	1289	104	2		wild_type	ERR16061020		This study
S. enterica	Napoli (predicted)	A_18-1876	S18LNR1876	2018	France	France	Bretagne	35		FRH03		Environment	Poultry	9	7				SAL_HB8092AA	SAL_PC3218AA_AS	474	60	161	147	96	178	155	12	142	264023	264023	264023	264023	124002	124002	27729	27729	27729	1543	1543a	N2	1289	104	2		wild_type	ERR16061021		This study
S. enterica	Napoli (predicted)	A_18-2070	S18LNR2070	2018	France	France	Pays-de-la-Loire	44		FRG01		Environment	Poultry	12	21				SAL_HB8088AA	SAL_PC3128AA_AS	474	60	161	147	96	178	155	12	142	264028	264028	264028	264028	140612	27733	27733	27733	27729	1543	1543a	N2	1289	104	2		wild_type	ERR16061022		This study
S. enterica	Napoli (predicted)	A_18-2106	S18LNR2106	2018	France	France	Pays-de-la-Loire	85		FRG05		Environment	Poultry	12	27				SAL_HB8085AA	SAL_PC3125AA_AS	474	60	161	147	96	178	155	12	142	264012	264012	264012	204662	204662	140597	27729	27729	27729	1543	1543a	N2	1289	104	2		wild_type	ERR16061023		This study
S. enterica	Napoli (predicted)	201802514		2018	France	France	Pays-de-la-Loire	44	44100 (LAM)	FRG01		Human	Blood	4	12	Female	42	Isolated	SAL_SA4158AA	SAL_DB8692AA_AS	474	60	161	147	96	178	155	12	142	140666	140666	140666	140666	140666	124002	27729	27729	27729	1543	1543a	N2	1289	104	2		wild_type	ERR16083530		This study
S. enterica	Napoli (predicted)	201803689		2018	France	France	Nouvelle-Aquitaine	16	16130	FRI31		Human	Stool	5	30	Male	2	Isolated	SAL_SA4155AA	SAL_DB8690AA_AS	474	60	161	147	96	178	155	12	142	140663	140663	140663	140663	140663	140591	27733	27733	27729	1543	1543a	N2	1289	104	2		wild_type	ERR16083532		This study
S. enterica	Napoli (predicted)	201803718		2018	France		Bretagne	29	29200	FRH02	No Travel declared	Human	Stool	6	3	Male	41	Isolated	SAL_SA4153AA	SAL_DB8688AA_AS	2019	60	161	147	348	178	155	12	142	140662	140662	140662	140662	97215	97215	20426	20426	7673	7673	7673	N1	1289	104	2		wild_type	ERR16083533		This study
S. enterica	Napoli (predicted)	201803792		2018	France	France	Nouvelle-Aquitaine	87	87500	FRI23		Human	Stool	6	2	Female	92		SAL_SA4154AA	SAL_DB8689AA_AS	474	60	161	147	96	178	155	12	142	140664	140664	140664	140664	140664	140580	27733	27733	27729	1543	1543a	N2	1289	104	2		wild_type	ERR16083534		This study
S. enterica	Napoli (predicted)	201804043		2018	France	France	Pays-de-la-Loire	44	44530	FRG01		Human	Stool	6	9	Female	78		SAL_SA4150AA	SAL_DB8685AA_AS	474	60	161	147	96	178	155	12	142	140656	140656	140656	140656	27733	27733	27733	27733	27729	1543	1543a	N2	1289	104	2		wild_type	ERR16083535		This study
S. enterica	Napoli (predicted)	201804122		2018	France	France	Pays-de-la-Loire	49	49360	FRG02		Human	Stool	6	13	Male	78	Isolated	SAL_SA4148AA	SAL_DB8684AA_AS	474	60	161	147	96	178	155	12	142	140659	140659	140659	140659	140659	140659	27733	27733	27729	1543	1543a	N2	1289	104	2		wild_type	ERR16083537		This study
S. enterica	Napoli (predicted)	201804130		2018	France	France	Bretagne	29	29420	FRH02		Human	Stool	6	7	Male	30		SAL_SA4147AA	SAL_DB8682AA_AS	474	60	161	147	96	178	155	12	142	140654	140654	140654	140654	140654	140654	140654	140654	27729	1543	1543a	N2	1289	104	2		wild_type	ERR16083538		This study
S. enterica	Napoli (predicted)	201804180		2018	France	France	Bretagne	56	56350	FRH04		Human	Stool	6	13	Female	45	Isolated	SAL_SA4146AA	SAL_DB8681AA_AS	474	60	161	147	96	178	155	12	142	140657	140657	140657	140657	140612	27733	27733	27733	27729	1543	1543a	N2	1289	104	2		wild_type	ERR16083540		This study
S. enterica	Napoli (predicted)	201804258		2018	France	France	Pays-de-la-Loire	53	53100	FRG03		Human	Stool	6	15	Female	1		SAL_SA4141AA	SAL_DB8676AA_AS	474	60	161	147	96	178	155	12	142	140648	140648	140648	140648	140648	140611	27729	27729	27729	1543	1543a	N2	1289	104	2		wild_type	ERR16083542		This study
S. enterica	Napoli (predicted)	201804264		2018	France	France	Nouvelle-Aquitaine	79	79230	FRI33		Human	Stool	6	16	Male	27		SAL_SA4143AA	SAL_DB8678AA_AS	474	60	161	147	96	178	155	12	142	140655	140655	140655	140655	140655	140655	27729	27729	27729	1543	1543a	N2	1289	104	2		wild_type	ERR16083543		This study
S. enterica	Napoli (predicted)	201804288		2018	France	France	Pays-de-la-Loire	53	53240	FRG03		Human	Stool	6	9	Female	3	Isolated	SAL_SA4142AA	SAL_DB8677AA_AS	474	60	161	147	96	178	155	12	142	140649	140649	140649	140649	140649	140611	27729	27729	27729	1543	1543a	N2	1289	104	2		wild_type	ERR16083544		This study
S. enterica	Napoli (predicted)	201804298		2018	France	France	Bretagne	35	35580	FRH03		Human	Stool	6	21	Female	1		SAL_SA4139AA	SAL_DB8674AA_AS	474	60	161	147	96	178	155	12	142	140650	140650	140650	140650	140650	140650	27729	27729	27729	1543	1543a	N2	1289	104	2		wild_type	ERR16083545		This study
S. enterica	Napoli (predicted)	201804300		2018	France	France	Pays-de-la-Loire	44	44600 (LAM)	FRG01		Human	Stool	6	18	Male	5	Isolated	SAL_SA4138AA	SAL_DB8673AA_AS	474	60	161	147	96	178	155	12	142	140651	140651	140651	140651	140651	27733	27733	27733	27729	1543	1543a	N2	1289	104	2		wild_type	ERR16083546		This study
S. enterica	Napoli (predicted)	201804314		2018	France	France	Pays-de-la-Loire	85	85270	FRG05		Human	Stool	6	18	Male	< 1	Isolated	SAL_SA4134AA	SAL_DB8669AA_AS	474	60	161	147	96	178	155	12	142	140661	140661	140661	140661	124002	124002	27729	27729	27729	1543	1543a	N2	1289	104	2		wild_type	ERR16083547		This study
S. enterica	Napoli (predicted)	201804320		2018	France	France	Centre_Val-de-Loire	37	37130	FRB04		Human	Stool	6	19	Male	64		SAL_SA4135AA	SAL_DB8670AA_AS	474	60	161	147	96	178	155	12	142	140652	140652	140652	140652	140652	140652	27729	27729	27729	1543	1543a	N2	1289	104	2		wild_type	ERR16083548		This study
S. enterica	Napoli (predicted)	201804354		2018	France	France	Pays-de-la-Loire	44	44410	FRG01		Human	Stool	6	21	Male	1		SAL_SA4136AA	SAL_DB8702AA_AS	474	60	161	147	96	178	155	12	142	140581	140581	140581	140581	140581	27733	27733	27733	27729	1543	1543a	N2	1289	104	2		wild_type	ERR16083549		This study
S. enterica	Napoli (predicted)	201804358		2018	France	France	Pays-de-la-Loire	44	44350	FRG01		Human	Stool	6	20	Female	40		SAL_SA4137AA	SAL_DB8672AA_AS	474	60	161	147	96	178	155	12	142	140647	140647	140647	140647	140647	27733	27733	27733	27729	1543	1543a	N2	1289	104	2		wild_type	ERR16083550		This study
S. enterica	Napoli (predicted)	201804378		2018	France	France	Nouvelle-Aquitaine	86	86280	FRI34		Human	Stool	6	25	Male	7		SAL_SA4133AA	SAL_DB8668AA_AS	474	60	161	147	96	178	155	12	142	140646	140646	140646	140646	140646	140646	27733	27733	27729	1543	1543a	N2	1289	104	2		wild_type	ERR16083551		This study
S. enterica	Napoli (predicted)	201804469		2018	France	France	Pays-de-la-Loire	44	44390	FRG01		Human	Stool	6	23	Male	61	Isolated	SAL_SA4132AA	SAL_DB8667AA_AS	474	60	161	147	96	178	155	12	142	140641	140641	140641	140641	27733	27733	27733	27733	27729	1543	1543a	N2	1289	104	2		wild_type	ERR16083552		This study
S. enterica	Napoli (predicted)	201804588		2018	France	France	Nouvelle-Aquitaine	17	17360	FRI32		Human	Stool	7	1	Female	87	Isolated	SAL_SA4127AA	SAL_DB8662AA_AS	474	60	161	147	96	178	155	12	142	140640	140640	140640	140640	140640	140576	27733	27733	27729	1543	1543a	N2	1289	104	2		wild_type	ERR16083553		This study
S. enterica	Napoli (predicted)	201804611		2018	France	France	Pays-de-la-Loire	49	49325 (LAM)	FRG02	No Travel declared	Human	Stool	6	28	Male	70	Isolated	SAL_SA4130AA	SAL_DB8665AA_AS	474	60	161	147	96	178	155	12	142	140644	140644	140644	140644	140644	140644	140587	27729	27729	1543	1543a	N2	1289	104	2		wild_type	ERR16083554		This study
S. enterica	Napoli (predicted)	201804614		2018	France	France	Pays-de-la-Loire	44	44370	FRG01		Human	Stool	6	26	Male	83	Isolated	SAL_SA4131AA	SAL_DB8666AA_AS	474	60	161	147	96	178	155	12	142	140645	140645	140645	140645	124002	124002	27729	27729	27729	1543	1543a	N2	1289	104	2		wild_type	ERR16083555		This study
S. enterica	Napoli (predicted)	201804735		2018	France	France	Hauts-de-France	59	59200	FRE11		Human	Stool	7	3	Male	38	Isolated	SAL_SA4128AA	SAL_DB8663AA_AS	474	60	161	147	96	178	155	12	142	140642	140642	140642	140630	140630	124002	27729	27729	27729	1543	1543a	N2	1289	104	2		wild_type	ERR16083556		This study
S. enterica	Napoli (predicted)	201804754		2018	France	France	Pays-de-la-Loire	44	44130	FRG01		Human	Urine	6	30	Female	32		SAL_SA4125AA	SAL_DB8660AA_AS	474	60	161	147	96	178	155	12	142	140636	140636	140636	140636	124002	124002	27729	27729	27729	1543	1543a	N2	1289	104	2		wild_type	ERR16083557		This study
S. enterica	Napoli (predicted)	201804881		2018	France	France	Pays-de-la-Loire	44	44310	FRG01		Human	Stool	7	6	Female	25		SAL_SA4126AA	SAL_DB8661AA_AS	474	60	161	147	96	178	155	12	142	140639	140639	140639	140639	140639	140587	140587	27729	27729	1543	1543a	N2	1289	104	2		wild_type	ERR16083558		This study
S. enterica	Napoli (predicted)	201804900		2018	France	France	Pays-de-la-Loire	85	85430	FRG05		Human	Stool	7	4	Female	34	Isolated	SAL_SA4129AA	SAL_DB8664AA_AS	474	60	161	147	96	178	155	12	142	140643	140643	140643	140643	140643	140643	27729	27729	27729	1543	1543a	N2	1289	104	2		wild_type	ERR16083559		This study
S. enterica	Napoli (predicted)	201804914		2018	France	France	Auvergne_Rhône-Alpes	63	63118	FRK14		Human	Stool	7	8	Male	1	Isolated	SAL_SA4123AA	SAL_DB8658AA_AS	474	60	161	147	96	178	155	12	142	140638	140638	140638	140638	27733	27733	27733	27733	27729	1543	1543a	N2	1289	104	2		wild_type	ERR16083560		This study
S. enterica	Napoli (predicted)	201804936		2018	France	France	Pays-de-la-Loire	49	49600	FRG02		Human	Blood	7	9	Female	84	Isolated	SAL_SA4122AA	SAL_DB8657AA_AS	474	60	161	147	96	178	155	12	142	140634	140634	140634	140634	124002	124002	27729	27729	27729	1543	1543a	N2	1289	104	2		wild_type	ERR16083561		This study
S. enterica	Napoli (predicted)	201804937		2018	France	France	Pays-de-la-Loire	44	44116	FRG01	No Travel declared	Human	Stool	7	10	Male	104	Isolated	SAL_SA4124AA	SAL_DB8659AA_AS	474	60	161	147	96	178	155	12	142	140637	140637	140637	140637	140608	27733	27733	27733	27729	1543	1543a	N2	1289	104	2		wild_type	ERR16083562		This study
S. enterica	Napoli (predicted)	201804958		2018	France	France	Nouvelle-Aquitaine	17	17260	FRI32		Human	Stool	7	11	Male	< 1	Isolated	SAL_SA4121AA	SAL_DB8656AA_AS	474	60	161	147	96	178	155	12	142	140635	140635	140635	140635	140635	140604	27729	27729	27729	1543	1543a	N2	1289	104	2		wild_type	ERR16083563		This study
S. enterica	Napoli (predicted)	201804966		2018	France	France	Pays-de-la-Loire	44	44600	FRG01		Human	Stool	7	9	Male	9	Isolated	SAL_SA4119AA	SAL_DB8655AA_AS	474	60	161	147	96	178	155	12	142	140632	140632	140632	140632	140632	27733	27733	27733	27729	1543	1543a	N2	1289	104	2		wild_type	ERR16083564		This study
S. enterica	Napoli (predicted)	201804986		2018	France	France	Pays-de-la-Loire	44	44116	FRG01	No Travel declared	Human	Stool	6	22	Male	65	Isolated	SAL_SA4120AA	SAL_DB8654AA_AS	474	60	161	147	96	178	155	12	142	140633	140633	140633	140633	124002	124002	27729	27729	27729	1543	1543a	N2	1289	104	2		wild_type	ERR16083565		This study
S. enterica	Napoli (predicted)	201805017		2018	France	France	Nouvelle-Aquitaine	86	86580	FRI34		Human	Stool	7	12	Female	69		SAL_SA4117AA	SAL_DB8652AA_AS	474	60	161	147	96	178	155	12	142	140629	140629	140629	140580	140580	140580	27733	27733	27729	1543	1543a	N2	1289	104	2		wild_type	ERR16083567		This study
S. enterica	Napoli (predicted)	201805019		2018	France	France	Pays-de-la-Loire	85	85230	FRG05		Human	Stool	7	13	Male	61		SAL_SA4116AA	SAL_DB8651AA_AS	474	60	161	147	96	178	155	12	142	140627	140627	140627	140627	124002	124002	27729	27729	27729	1543	1543a	N2	1289	104	2		wild_type	ERR16083568		This study
S. enterica	Napoli (predicted)	201805020		2018	France	France	Pays-de-la-Loire	85	85500	FRG05		Human	Stool	7	15	Male	6		SAL_SA4115AA	SAL_DB8650AA_AS	474	60	161	147	96	178	155	12	142	140630	140630	140630	140630	140630	124002	27729	27729	27729	1543	1543a	N2	1289	104	2	blaOXA-48	wild_type	ERR16083569		This study
S. enterica	Napoli (predicted)	201805093		2018	France	France	Bretagne	56	56600	FRH04		Human	Stool	7	13	Male	4		SAL_SA4114AA	SAL_DB8649AA_AS	474	60	161	147	96	178	155	12	142	140626	140626	140626	140626	140626	140626	140618	27729	27729	1543	1543a	N2	1289	104	2		wild_type	ERR16083570		This study
S. enterica	Napoli (predicted)	201805176		2018	France	France	Normandie	76	76031 (LAM)	FRD22		Human	Blood	7	17	Male	86	Isolated	SAL_SA4112AA	SAL_DB8647AA_AS	474	60	161	147	96	178	155	12	142	140624	140624	140624	140624	140624	140624	140624	140624	140624	1543	1543a	N2	1289	104	2		wild_type	ERR16083571		This study
S. enterica	Napoli (predicted)	201805259		2018	France	France	Pays-de-la-Loire	49	49520	FRG02		Human	Stool	7	17	Male	1	Isolated	SAL_SA4108AA	SAL_DB8643AA_AS	474	60	161	147	96	178	155	12	142	140619	140619	140619	140619	140619	27733	27733	27733	27729	1543	1543a	N2	1289	104	2		wild_type	ERR16083573		This study
S. enterica	Napoli (predicted)	201805275		2018	France	France	Nouvelle-Aquitaine	17	17800	FRI32		Human	Stool	7	19	Female	5	Isolated	SAL_SA4110AA	SAL_DB8644AA_AS	474	60	161	147	96	178	155	12	142	140621	140621	140621	140621	140621	140621	27733	27733	27729	1543	1543a	N2	1289	104	2		wild_type	ERR16083574		This study
S. enterica	Napoli (predicted)	201805296		2018	France	France	Bretagne	56	56000	FRH04		Human	Stool	7	19	Male	24	Isolated	SAL_SA4107AA	SAL_DB8642AA_AS	474	60	161	147	96	178	155	12	142	140618	140618	140618	140618	140618	140618	140618	27729	27729	1543	1543a	N2	1289	104	2		wild_type	ERR16083575		This study
S. enterica	Napoli (predicted)	201805328		2018	France	France	Occitanie	09	09017 (LAM)	FRJ21		Human	Stool	7	17	Male	36		SAL_SA4105AA	SAL_DB8640AA_AS	474	60	161	147	96	178	155	12	142	140613	140613	140613	140612	140612	27733	27733	27733	27729	1543	1543a	N2	1289	104	2		wild_type	ERR16083576		This study
S. enterica	Napoli (predicted)	201805345		2018	France	France	Bretagne	29	29200	FRH02		Human	Stool	7	23	Male	1	Other group of cases	SAL_SA4104AA	SAL_DB8639AA_AS	474	60	161	147	96	178	155	12	142	140616	140616	140616	140616	140616	140616	140616	27729	27729	1543	1543a	N2	1289	104	2		wild_type	ERR16083577		This study
S. enterica	Napoli (predicted)	201805351		2018	France	France	Nouvelle-Aquitaine	33	33500 (LAM)	FRI12		Human	Stool	7	23	Female	86	Isolated	SAL_SA4102AA	SAL_DB8637AA_AS	474	60	161	147	96	178	155	12	142	140615	140615	140615	140615	140615	27733	27733	27733	27729	1543	1543a	N2	1289	104	2		wild_type	ERR16083578		This study
S. enterica	Napoli (predicted)	201805382		2018	France	France	Nouvelle-Aquitaine	79	79180	FRI33		Human	Stool	7	23	Male	17	Isolated	SAL_SA4106AA	SAL_DB8641AA_AS	474	60	161	147	96	178	155	12	142	140622	140622	140622	140622	140622	140604	27729	27729	27729	1543	1543a	N2	1289	104	2		wild_type	ERR16083579		This study
S. enterica	Napoli (predicted)	201805455		2018	France	France	Pays-de-la-Loire	44	44200	FRG01	No Travel declared	Human	Stool	7	19	Male	3	Isolated	SAL_SA4103AA	SAL_DB8638AA_AS	474	60	161	147	96	178	155	12	142	140620	140620	140620	140620	140620	140605	27729	27729	27729	1543	1543a	N2	1289	104	2		wild_type	ERR16083580		This study
S. enterica	Napoli (predicted)	201805531		2018	France	France	Normandie	76	76480	FRD22		Human	Stool	7	25	Male	49	Isolated	SAL_SA4101AA	SAL_DB8636AA_AS	474	60	161	147	96	178	155	12	142	140612	140612	140612	140612	140612	27733	27733	27733	27729	1543	1543a	N2	1289	104	2		wild_type	ERR16083581		This study
S. enterica	Napoli (predicted)	201805572		2018	France	France	Nouvelle-Aquitaine	33	33185 (LAM)	FRI12		Human	Stool	7	27	Male	11	Family	SAL_SA4096AA	SAL_DB8632AA_AS	474	60	161	147	96	178	155	12	142	140604	140604	140604	140604	140604	140604	27729	27729	27729	1543	1543a	N2	1289	104	2		wild_type	ERR16083582		This study
S. enterica	Napoli (predicted)	201805596		2018	France	France	Provence-Alpes-Cote-dAzur	13	13004	FRL04		Human	Stool	7	16	Male	25	Isolated	SAL_SA4100AA	SAL_DB8635AA_AS	474	60	161	147	96	178	155	12	142	140613	140613	140613	140612	140612	27733	27733	27733	27729	1543	1543a	N2	1289	104	2		wild_type	ERR16083583		This study
S. enterica	Napoli (predicted)	201805622		2018	France	France	Occitanie	31	31100	FRJ23		Human	Stool	7	25	Female	63		SAL_SA4098AA	SAL_DB8631AA_AS	474	60	161	147	96	178	155	12	142	140609	140609	140609	140609	140609	140597	27729	27729	27729	1543	1543a	N2	1289	104	2		wild_type	ERR16083584		This study
S. enterica	Napoli (predicted)	201805635		2018	France	France	Pays-de-la-Loire	49	49140	FRG02		Human	Stool	7	31	Female	68		SAL_SA4097AA	SAL_DB8633AA_AS	474	60	161	147	96	178	155	12	142	140611	140611	140611	140611	140611	140611	27729	27729	27729	1543	1543a	N2	1289	104	2		wild_type	ERR16083585		This study
S. enterica	Napoli (predicted)	201805643		2018	France	France	Provence-Alpes-Cote-dAzur	06	06100	FRL03	No Travel declared	Human	Stool	7	30	Male	44	Isolated	SAL_SA4094AA	SAL_DB8629AA_AS	474	60	161	147	96	178	155	12	142	140607	140607	140607	140607	140607	140577	26263	24950	1543	1543	1543b	N2	1289	104	2		wild_type	ERR16083586		This study
S. enterica	Napoli (predicted)	201805658		2018	France	France	Nouvelle-Aquitaine	47	47310	FRI14		Human	Stool	7	25	Female	13	Collective food poisoning	SAL_SA4093AA	SAL_DB8628AA_AS	474	60	161	147	96	178	155	12	142	140604	140604	140604	140604	140604	140604	27729	27729	27729	1543	1543a	N2	1289	104	2		wild_type	ERR16083587		This study
S. enterica	Napoli (predicted)	201805683		2018	France	France	Nouvelle-Aquitaine	19	19012 (LAM)	FRI21		Human	Blood	7	31	Male	88		SAL_SA4095AA	SAL_DB8630AA_AS	474	60	161	147	96	178	155	12	142	140614	140614	140614	140614	140614	140614	140588	140588	140575	1543	1543a	N2	1289	104	2		wild_type	ERR16083588		This study
S. enterica	Napoli (predicted)	201805747		2018	France	France	Grand-Est	68	68790	FRF12		Human	Stool	7	30	Male	21	Isolated	SAL_SA4090AA	SAL_DB8625AA_AS	474	60	161	147	96	178	155	12	142	140601	140601	140601	140601	140601	107128	97218	24950	1543	1543	1543b	N2	1289	104	2		wild_type	ERR16083589		This study
S. enterica	Napoli (predicted)	201805779		2018	France	France	Pays-de-la-Loire	49	49110	FRG02		Human	Stool	8	2	Male	93		SAL_SA4089AA	SAL_DB8624AA_AS	474	60	161	147	96	178	155	12	142	140603	140603	140603	140603	124002	124002	27729	27729	27729	1543	1543a	N2	1289	104	2		wild_type	ERR16083590		This study
S. enterica	Napoli (predicted)	201805787		2018	France	France	Centre_Val-de-Loire	28	28230	FRB02		Human	Stool	7	4	Female	1		SAL_SA4091AA	SAL_DB8626AA_AS	474	60	161	147	96	178	155	12	142	140605	140605	140605	140605	140605	140605	27729	27729	27729	1543	1543a	N2	1289	104	2		wild_type	ERR16083591		This study
S. enterica	Napoli (predicted)	201805827		2018	France	France	Pays-de-la-Loire	53	53015 (LAM)	FRG03		Human	Stool	8	4	Female	62		SAL_SA4092AA	SAL_DB8627AA_AS	474	60	161	147	96	178	155	12	142	140608	140608	140608	140608	140608	27733	27733	27733	27729	1543	1543a	N2	1289	104	2		wild_type	ERR16083592		This study
S. enterica	Napoli (predicted)	201805887		2018	France	France	Auvergne_Rhône-Alpes	15	15190	FRK12		Human	Stool	8	4	Female	89	Isolated	SAL_SA4088AA	SAL_DB8623AA_AS	474	60	161	147	96	178	155	12	142	140602	140602	140602	140602	140602	140602	140588	140588	140575	1543	1543a	N2	1289	104	2		wild_type	ERR16083593		This study
S. enterica	Napoli (predicted)	201806099		2018	France	France	Auvergne_Rhône-Alpes	15	15200	FRK12		Human	Stool	8	8	Female	7		SAL_SA4086AA	SAL_DB8621AA_AS	474	60	161	147	96	178	155	12	142	140598	140598	140587	140587	140587	140587	140587	27729	27729	1543	1543a	N2	1289	104	2		wild_type	ERR16083594		This study
S. enterica	Napoli (predicted)	201806103		2018	France	France	Pays-de-la-Loire	44	44330	FRG01		Human	Stool	8	6	Male	74	Isolated	SAL_SA4085AA	SAL_DB8703AA_AS	474	60	161	147	96	178	155	12	142	140582	140582	140582	140582	124002	124002	27729	27729	27729	1543	1543a	N2	1289	104	2		wild_type	ERR16083595		This study
S. enterica	Napoli (predicted)	201806105		2018	France	France	Auvergne_Rhône-Alpes	69	69410	FRK26	Travel_to_Greece	Human	Stool	8	11	Female	10		SAL_SA4084AA	SAL_DB8619AA_AS	474	60	161	147	96	178	155	12	142	140600	140600	140600	140600	140600	107044	24950	24950	1543	1543	1543b	N2	1289	104	2		wild_type	ERR16083596		This study
S. enterica	Napoli (predicted)	201806140		2018	France	France	Corse	20	20000	FRM01		Human	Stool	8	10	Male	1		SAL_SA4083AA	SAL_DB8618AA_AS	474	60	161	147	96	178	155	12	142	140593	140593	140593	140593	140593	140577	26263	24950	1543	1543	1543b	N2	1289	104	2		wild_type	ERR16083597		This study
S. enterica	Napoli (predicted)	201806217		2018	France	France	Pays-de-la-Loire	49	49230	FRG02		Human	Stool	8	9	Male	2	Family	SAL_SA4087AA	SAL_DB8622AA_AS	474	60	161	147	96	178	155	12	142	140606	140606	140584	140584	124002	124002	27729	27729	27729	1543	1543a	N2	1289	104	2		wild_type	ERR16083598		This study
S. enterica	Napoli (predicted)	201806218		2018	France	France	Pays-de-la-Loire	49	49230	FRG02		Human	Stool	8	9	Female	28	Family	SAL_SA4082AA	SAL_DB8617AA_AS	474	60	161	147	96	178	155	12	142	140596	140584	140584	140584	124002	124002	27729	27729	27729	1543	1543a	N2	1289	104	2		wild_type	ERR16083599		This study
S. enterica	Napoli (predicted)	201806219		2018	France	France	Pays-de-la-Loire	44	44190	FRG01		Human	Stool	8	11	Female	29	Family	SAL_SA4081AA	SAL_DB8616AA_AS	474	60	161	147	96	178	155	12	142	140594	140584	140584	140584	124002	124002	27729	27729	27729	1543	1543a	N2	1289	104	2		wild_type	ERR16083600		This study
S. enterica	Napoli (predicted)	201806220		2018	France	France	Pays-de-la-Loire	44	44190	FRG01		Human	Stool	8	11	Male	1	Family	SAL_SA4080AA	SAL_DB8704AA_AS	474	60	161	147	96	178	155	12	142	140584	140584	140584	140584	124002	124002	27729	27729	27729	1543	1543a	N2	1289	104	2		wild_type	ERR16083601		This study
S. enterica	Napoli (predicted)	201806221		2018	France	France	Pays-de-la-Loire	44	44190	FRG01		Human	Stool	8	8	Female	4	Family	SAL_SA4079AA	SAL_DB8614AA_AS	474	60	161	147	96	178	155	12	142	140595	140595	140584	140584	124002	124002	27729	27729	27729	1543	1543a	N2	1289	104	2		wild_type	ERR16083602		This study
S. enterica	Napoli (predicted)	201806231		2018	France	France	Pays-de-la-Loire	44	44470	FRG01	No Travel declared	Human	Stool	7	12	Male	98	Isolated	SAL_SA4078AA	SAL_DB8613AA_AS	474	60	161	147	96	178	155	12	142	140597	140597	140597	140597	140597	140597	27729	27729	27729	1543	1543a	N2	1289	104	2		wild_type	ERR16083603		This study
S. enterica	Napoli (predicted)	201806391		2018	France	France	Nouvelle-Aquitaine	16	16100	FRI31		Human	Stool	8	14	Male	< 1		SAL_SA4075AA	SAL_DB8610AA_AS	474	60	161	147	96	178	155	12	142	140591	140591	140591	140591	140591	140591	27733	27733	27729	1543	1543a	N2	1289	104	2		wild_type	ERR16083605		This study
S. enterica	Napoli (predicted)	201806416		2018	France	France	Pays-de-la-Loire	44	44640	FRG01		Human	Stool	8	18	Female	81	Isolated	SAL_SA4076AA	SAL_DB8611AA_AS	474	60	161	147	96	178	155	12	142	140599	140599	140599	140599	140599	140587	140587	27729	27729	1543	1543a	N2	1289	104	2		wild_type	ERR16083607		This study
S. enterica	Napoli (predicted)	201806426		2018	France	France	Bourgogne_Franche-Comté	90	90150	FRC24		Human	Stool	8		Female	3		SAL_MB8021AA	SAL_VC2003AA_AS	474	60	161	147	96	178	155	12	142	312249	312249	312249	140601	140601	107128	97218	24950	1543	1543	1543b	N2	1289	104	2		wild_type	ERR16083608		This study
S. enterica	Napoli (predicted)	201806448		2018	France	France	Auvergne_Rhône-Alpes	15	15200	FRK12		Human	Stool	8	13	Female	1		SAL_SA4072AA	SAL_DB8607AA_AS	474	60	161	147	96	178	155	12	142	140587	140587	140587	140587	140587	140587	140587	27729	27729	1543	1543a	N2	1289	104	2		wild_type	ERR16083609		This study
S. enterica	Napoli (predicted)	201806624		2018	France	France	Centre_Val-de-Loire	41	41140	FRB05		Human	Stool	08	19	Male	83		SAL_ZA6513AA	SAL_SB2648AA_AS	474	60	161	147	96	178	155	12	142	204620	204620	204620	204620	204620	204620	27729	27729	27729	1543	1543a	N2	1289	104	2		wild_type	ERR16083610		This study
S. enterica	Napoli (predicted)	201806636		2018	France	France	Ile-de-France	91	91530	FR104		Human	Stool	08	21	Female	74	Isolated	SAL_ZA6512AA	SAL_SB2647AA_AS	474	60	161	147	96	178	155	12	142	204621	204621	204621	204621	27733	27733	27733	27733	27729	1543	1543a	N2	1289	104	2		wild_type	ERR16083611		This study
S. enterica	Napoli (predicted)	201806678		2018	France	Italy	Grand-Est	57		FRF33		Human	Stool	08	20	Female	21		SAL_ZA6764AA	SAL_SB3162AA_AS	2008	60	161	147	348	178	155	436	142	204863	204863	204863	204863	63315	7814	7673	7673	7673	7673	7673	N1	1289	104	2		wild_type	ERR16083612		This study
S. enterica	Napoli (predicted)	201806720	ISS_Salm201806720	2018	France	Italy	Hauts-de-France	02	02100		Travel_to_Italy	Human	Stool	08	18	Female	19	Isolated	SAL_ZA6763AA	SAL_SB3161AA_AS	2008	60	161	147	348	178	155	436	142	204866	204866	204866	204866	204866	100539	7673	7673	7673	7673	7673	N1	1289	104	2		wild_type	ERR16083613		This study
S. enterica	Napoli (predicted)	201806739		2018	France	France	Nouvelle-Aquitaine	19	19310	FRI21		Human	Stool	8	16	Male	72	Isolated	SAL_SA4070AA	SAL_DB8605AA_AS	474	60	161	147	96	178	155	12	142	140586	140586	140586	140586	140586	140586	27733	27733	27729	1543	1543a	N2	1289	104	2		wild_type	ERR16083614		This study
S. enterica	Napoli (predicted)	201806744		2018	France	France	Occitanie	31		FRJ23		Human	Stool	08	24	Male	57		SAL_VA0645AA	SAL_IB7062AA_AS	5168	60	161	147	96	1085	155	12	142	165886	165886	165886	165886	165886	165886	165886	140575	140575	1543	1543a	N2	1289	104	2		wild_type	ERR16083615		This study
S. enterica	Napoli (predicted)	201806804		2018	France	France	Occitanie	12	12027 (LAM)	FRJ22		Human	Stool	8	23	Female	1		SAL_SA4071AA	SAL_DB8606AA_AS	474	60	161	147	96	178	155	12	142	140588	140588	140588	140588	140588	140588	140588	140588	140575	1543	1543a	N2	1289	104	2		wild_type	ERR16083616		This study
S. enterica	Napoli (predicted)	201806837		2018	France	France	Nouvelle-Aquitaine	24	24108 (LAM)	FRI11		Human	Stool	8	24	Male	87	Isolated	SAL_SA4069AA	SAL_DB8604AA_AS	474	60	161	147	96	178	155	12	142	140576	140576	140576	140576	140576	140576	27733	27733	27729	1543	1543a	N2	1289	104	2		wild_type	ERR16083617		This study
S. enterica	Napoli (predicted)	201806902		2018	France	France	Provence-Alpes-Cote-dAzur	06	06700	FRL03		Human	Stool	8	27	Male	85	Isolated	SAL_SA4066AA	SAL_DB8601AA_AS	474	60	161	147	96	178	155	12	142	140577	140577	140577	140577	140577	140577	26263	24950	1543	1543	1543b	N2	1289	104	2		wild_type	ERR16083618		This study
S. enterica	Napoli (predicted)	201807020		2018	France	France	Nouvelle-Aquitaine	87	87130	FRI23		Human	Stool	08	27	Female	85		SAL_ZA6762AA	SAL_SB3160AA_AS	474	60	161	147	96	178	155	12	142	204862	204862	204862	204862	204862	204862	27733	27733	27729	1543	1543a	N2	1289	104	2		wild_type	ERR16083619		This study
S. enterica	Napoli (predicted)	201807081		2018	France	France	Nouvelle-Aquitaine	19		FRI21		Human	Stool	08	27	Female	73	Isolated	SAL_ZA6761AA	SAL_SB3159AA_AS	474	60	161	147	96	178	155	12	142	204864	204864	204864	204864	204864	204864	140588	140588	140575	1543	1543a	N2	1289	104	2		wild_type	ERR16083620		This study
S. enterica	Napoli (predicted)	201807118		2018	France	France	Pays-de-la-Loire	49	49450	FRG02		Human	Stool	08	30	Female	71		SAL_ZA6759AA	SAL_SB3157AA_AS	474	60	161	147	96	178	155	12	142	204867	204867	204867	204867	124002	124002	27729	27729	27729	1543	1543a	N2	1289	104	2		wild_type	ERR16083621		This study
S. enterica	Napoli (predicted)	201807250		2018	France	France	Centre_Val-de-Loire	45	45370	FRB06	No Travel declared	Human	Stool	09	3	Female	57		SAL_ZA6758AA	SAL_SB3156AA_AS	474	60	161	147	96	178	155	12	142	204848	204848	204848	204631	204631	140611	27729	27729	27729	1543	1543a	N2	1289	104	2		wild_type	ERR16083622		This study
S. enterica	Napoli (predicted)	201807257		2018	France	France	Centre_Val-de-Loire	45	45520	FRB06		Human	Stool	08	28	Male	4		SAL_VA0653AA	SAL_IB7070AA_AS	5170	60	161	781	96	178	155	12	142	165891	165891	165891	165891	165891	165891	140623	140623	27729	1543	1543a	N2	1289	104	2		wild_type	ERR16083623		This study
S. enterica	Napoli (predicted)	201807392		2018	France	France	Nouvelle-Aquitaine	79	79000	FRI33		Human	Stool	08	31	Male	25	Isolated	SAL_ZA6760AA	SAL_SB3158AA_AS	474	60	161	147	96	178	155	12	142	204865	204865	204865	204865	140696	27729	27729	27729	27729	1543	1543a	N2	1289	104	2		wild_type	ERR16083625		This study
S. enterica	Napoli (predicted)	201807494		2018	France	France	Centre_Val-de-Loire	36	36500	FRB03		Human	Stool	09	4	Female	72	Isolated	SAL_ZA6755AA	SAL_SB3140AA_AS	474	60	161	147	96	178	155	12	142	204856	204856	204856	204856	204856	140652	27729	27729	27729	1543	1543a	N2	1289	104	2		wild_type	ERR16083626		This study
S. enterica	Napoli (predicted)	201807543		2018	France	France	Pays-de-la-Loire	44	44590	FRG01	No Travel declared	Human	Stool	08	31	Female	80	Isolated	SAL_ZA6756AA	SAL_SB3141AA_AS	474	60	161	147	96	178	155	12	142	204861	204861	204861	204861	140619	27733	27733	27733	27729	1543	1543a	N2	1289	104	2		wild_type	ERR16083628		This study
S. enterica	Napoli (predicted)	201807576		2018	France	France	Nouvelle-Aquitaine	87	87240	FRI23		Human	Stool	09	8	Female	13		SAL_ZA6754AA	SAL_SB3139AA_AS	474	60	161	147	96	178	155	12	142	204855	204855	204855	204855	140654	140654	140654	140654	27729	1543	1543a	N2	1289	104	2		wild_type	ERR16083629		This study
S. enterica	Napoli (predicted)	201807619		2018	France	France	Occitanie	34	34070	FRJ13	No Travel declared	Human	Urine	09	7	Female	73	Isolated	SAL_ZA6753AA	SAL_SB3138AA_AS	474	60	161	147	96	178	155	12	142	204854	204854	204842	204842	124002	124002	27729	27729	27729	1543	1543a	N2	1289	104	2		wild_type	ERR16083630		This study
S. enterica	Napoli (predicted)	201807674		2018	France	France	Centre_Val-de-Loire	41	41110	FRB05		Human	Stool	09	5	Male	49	Isolated	SAL_ZA6752AA	SAL_SB3137AA_AS	474	60	161	147	96	178	155	12	142	204850	204850	204850	204850	204850	204620	27729	27729	27729	1543	1543a	N2	1289	104	2		wild_type	ERR16083631		This study
S. enterica	Napoli (predicted)	201807796		2018	France	France	Occitanie	12	12200	FRJ22		Human	Stool	08	30	Female	< 1	Isolated	SAL_VA0660AA	SAL_IB7077AA_AS	5170	60	161	781	96	178	155	12	142	165901	165901	165901	165901	140623	140623	140623	140623	27729	1543	1543a	N2	1289	104	2		wild_type	ERR16083632		This study
S. enterica	Napoli (predicted)	201807809		2018	France	France	Grand-Est	68	68300	FRF12	No Travel declared	Human	Stool	09	5	Male	78		SAL_ZA6749AA	SAL_SB3134AA_AS	474	60	161	147	96	178	155	12	142	204847	204847	204847	140695	140601	107128	97218	24950	1543	1543	1543b	N2	1289	104	2		wild_type	ERR16083633		This study
S. enterica	Napoli (predicted)	201807856		2018	France	France	Pays-de-la-Loire	44	44300	FRG01	Travel_to_Portugal	Human	Stool	09	5	Female	2	Isolated	SAL_ZA6750AA	SAL_SB3135AA_AS	474	60	161	147	96	178	155	12	142	204849	204849	204849	140599	140599	140587	140587	27729	27729	1543	1543a	N2	1289	104	2		wild_type	ERR16083634		This study
S. enterica	Napoli (predicted)	201807865		2018	France	France	Pays-de-la-Loire	72	72300	FRG04		Human	Stool	09	10	Female	82		SAL_ZA6747AA	SAL_SB3132AA_AS	474	60	161	147	96	178	155	12	142	204848	204848	204848	204631	204631	140611	27729	27729	27729	1543	1543a	N2	1289	104	2		wild_type	ERR16083635		This study
S. enterica	Napoli (predicted)	201807908		2018	France	France	Grand-Est	68		FRF12		Human	Blood	09	8	Female	2	Isolated	SAL_ZA6746AA	SAL_SB3131AA_AS	474	60	161	147	96	178	155	12	142	204853	204853	204853	140695	140601	107128	97218	24950	1543	1543	1543b	N2	1289	104	2		wild_type	ERR16083636		This study
S. enterica	Napoli (predicted)	201807922		2018	France	France	Pays-de-la-Loire	44	44100	FRG01	No Travel declared	Human	Stool	09	8	Male	31	Isolated	SAL_ZA6748AA	SAL_SB3133AA_AS	474	60	161	147	96	178	155	12	142	204852	204852	204849	140599	140599	140587	140587	27729	27729	1543	1543a	N2	1289	104	2		wild_type	ERR16083637		This study
S. enterica	Napoli (predicted)	201807978		2018	France	France	Pays-de-la-Loire	85	85600	FRG05		Human	Stool	09	12	Male	82	Isolated	SAL_ZA6743AA	SAL_SB3128AA_AS	474	60	161	147	96	178	155	12	142	204846	204846	204846	204846	124002	124002	27729	27729	27729	1543	1543a	N2	1289	104	2		wild_type	ERR16083638		This study
S. enterica	Napoli (predicted)	201808036		2018	France	France	Pays-de-la-Loire	49	49122	FRG02		Human	Stool	09	14	Female	79		SAL_ZA6745AA	SAL_SB3130AA_AS	474	60	161	147	96	178	155	12	142	204858	204858	204858	204858	124002	124002	27729	27729	27729	1543	1543a	N2	1289	104	2		wild_type	ERR16083639		This study
S. enterica	Napoli (predicted)	201808150		2018	France	France	Nouvelle-Aquitaine	17	17100	FRI32		Human	Blood	09	14	Female	97		SAL_ZA6744AA	SAL_SB3129AA_AS	474	60	161	147	96	178	155	12	142	204851	204851	204851	204851	140604	140604	27729	27729	27729	1543	1543a	N2	1289	104	2		wild_type	ERR16083640		This study
S. enterica	Napoli (predicted)	201808284		2018	France	France	Nouvelle-Aquitaine	47		FRI14		Human	Stool	09	13	Female	5	Isolated	SAL_ZA6742AA	SAL_SB3127AA_AS	474	60	161	147	96	178	155	12	142	204845	204845	204845	204845	204845	27733	27733	27733	27729	1543	1543a	N2	1289	104	2		wild_type	ERR16083641		This study
S. enterica	Napoli (predicted)	201808438		2018	France	France	Nouvelle-Aquitaine	17	17000	FRI32		Human	Stool	09	24	Male	5		SAL_ZA6741AA	SAL_SB3113AA_AS	474	60	161	147	96	178	155	12	142	204844	204844	204844	204844	140781	140604	27729	27729	27729	1543	1543a	N2	1289	104	2		wild_type	ERR16083642		This study
S. enterica	Napoli (predicted)	201808466		2018	France	France	Provence-Alpes-Cote-dAzur	83	83210	FRL05		Human	Stool	09	22	Female	75		SAL_ZA6739AA	SAL_SB3111AA_AS	474	60	161	147	96	178	155	12	142	204842	204842	204842	204842	124002	124002	27729	27729	27729	1543	1543a	N2	1289	104	2		wild_type	ERR16083644		This study
S. enterica	Napoli (predicted)	201808484		2018	France	France	Nouvelle-Aquitaine	79	79700	FRI33		Human	Stool	09	24	Male	26		SAL_ZA6738AA	SAL_SB3110AA_AS	474	60	161	147	96	178	155	12	142	204843	204843	204843	204843	140688	140611	27729	27729	27729	1543	1543a	N2	1289	104	2		wild_type	ERR16083645		This study
S. enterica	Napoli (predicted)	201808650		2018	France	France	Pays-de-la-Loire	85	85200	FRG05	No Travel declared	Human	Stool	09	26	Female	21		SAL_ZA6737AA	SAL_SB3109AA_AS	474	60	161	147	96	178	155	12	142	204838	204838	204838	204838	140671	140650	27729	27729	27729	1543	1543a	N2	1289	104	2		wild_type	ERR16083646		This study
S. enterica	Napoli (predicted)	201809084		2018	France	France	Pays-de-la-Loire	49	49000	FRG02	No Travel declared	Human	Stool	10	3	Male	3	Isolated	SAL_ZA6734AA	SAL_SB3106AA_AS	474	60	161	147	96	178	155	12	142	204841	204841	204841	204841	204841	140611	27729	27729	27729	1543	1543a	N2	1289	104	2		wild_type	ERR16083648		This study
S. enterica	Napoli (predicted)	201809086		2018	France	France	Pays-de-la-Loire	49	49140	FRG02		Human	Urine	10	8	Female	14		SAL_ZA6735AA	SAL_SB3107AA_AS	474	60	161	147	96	178	155	12	142	204836	204836	204836	204836	204671	140611	27729	27729	27729	1543	1543a	N2	1289	104	2		wild_type	ERR16083649		This study
S. enterica	Napoli (predicted)	201809120		2018	France	France	Pays-de-la-Loire	44		FRG01		Human	Stool	10	4	Female	69		SAL_ZA6733AA	SAL_SB3105AA_AS	474	60	161	147	96	178	155	12	142	204837	204837	204837	204837	140749	130700	27729	27729	27729	1543	1543a	N2	1289	104	2		wild_type	ERR16083650		This study
S. enterica	Napoli (predicted)	201809147		2018	France	France	Centre_Val-de-Loire	36	36000	FRB03		Human	Stool	10	8	Female	81	Isolated	SAL_ZA6731AA	SAL_SB3103AA_AS	474	60	161	147	96	178	155	12	142	204835	204835	204835	140587	140587	140587	140587	27729	27729	1543	1543a	N2	1289	104	2		wild_type	ERR16083651		This study
S. enterica	Napoli (predicted)	201809195		2018	France	France	Nouvelle-Aquitaine	24	24210	FRI11		Human	Stool	10	8	Female	89		SAL_ZA6732AA	SAL_SB3104AA_AS	474	60	161	147	96	178	155	12	142	204834	204834	204834	204834	204834	140653	27733	27733	27729	1543	1543a	N2	1289	104	2		wild_type	ERR16083652		This study
S. enterica	Napoli (predicted)	201809212		2018	France	France	Pays-de-la-Loire	85	85290	FRG05	No Travel declared	Human	Stool	10	10	Male	2	Isolated	SAL_ZA6729AA	SAL_SB3088AA_AS	474	60	161	147	96	178	155	12	142	204831	204831	204831	140603	124002	124002	27729	27729	27729	1543	1543a	N2	1289	104	2		wild_type	ERR16083653		This study
S. enterica	Napoli (predicted)	201809241		2018	France	France	Ile-de-France	94	94260	FR107		Human	Urine	10	10	Female	68		SAL_ZA6708AA	SAL_SB3067AA_AS	474	60	161	147	96	178	155	12	142	204808	204808	204808	204808	204642	140760	140587	27729	27729	1543	1543a	N2	1289	104	2		wild_type	ERR16083654		This study
S. enterica	Napoli (predicted)	201809454		2018	France	France	Pays-de-la-Loire	85	85300	FRG05		Human	Stool	10	10	Female	78		SAL_ZA6721AA	SAL_SB3080AA_AS	474	60	161	147	96	178	155	12	142	204826	204826	204826	204826	204687	140587	140587	27729	27729	1543	1543a	N2	1289	104	2		wild_type	ERR16083655		This study
S. enterica	Napoli (predicted)	201809638		2018	France	France	Grand-Est	68	68120	FRF12		Human	Stool	10	17	Male	< 1	Isolated	SAL_ZA6685AA	SAL_SB3044AA_AS	474	60	161	147	96	178	155	12	142	204784	204784	204784	140601	140601	107128	97218	24950	1543	1543	1543b	N2	1289	104	2		wild_type	ERR16083657		This study
S. enterica	Napoli (predicted)	201809702		2018	France	France	Pays-de-la-Loire	44	44130	FRG01		Human	Stool	10	13	Female	< 1	Isolated	SAL_ZA6667AA	SAL_SB3026AA_AS	474	60	161	147	96	178	155	12	142	204768	204768	204768	27733	27733	27733	27733	27733	27729	1543	1543a	N2	1289	104	2		wild_type	ERR16083659		This study
S. enterica	Napoli (predicted)	201809704		2018	France	France	Bretagne	29	29590	FRH02		Human	Stool	10	22	Male	60	Isolated	SAL_ZA6666AA	SAL_SB3025AA_AS	474	60	161	147	96	178	155	12	142	204769	204769	204769	204769	140749	130700	27729	27729	27729	1543	1543a	N2	1289	104	2		wild_type	ERR16083660		This study
S. enterica	Napoli (predicted)	201809705		2018	France	France	Normandie	61	61500	FRD13		Human	Stool	10	19	Male	63	Isolated	SAL_ZA6642AA	SAL_SB3001AA_AS	474	60	161	147	96	178	155	12	142	204747	204747	204747	204747	204747	140605	27729	27729	27729	1543	1543a	N2	1289	104	2		wild_type	ERR16083661		This study
S. enterica	Napoli (predicted)	201809740		2018	France	France	Nouvelle-Aquitaine	16	16200	FRI31		Human	Blood	10	22	Female	60		SAL_ZA6638AA	SAL_SB2997AA_AS	474	60	161	147	96	178	155	12	142	204743	204743	204743	204743	204743	140591	27733	27733	27729	1543	1543a	N2	1289	104	2		wild_type	ERR16083662		This study
S. enterica	Napoli (predicted)	201809767		2018	France	France	Pays-de-la-Loire	49	49460	FRG02		Human	Stool	10	24	Female	< 1		SAL_ZA6637AA	SAL_SB2996AA_AS	474	60	161	147	96	178	155	12	142	204741	204741	204741	204741	204741	140611	27729	27729	27729	1543	1543a	N2	1289	104	2		wild_type	ERR16083663		This study
S. enterica	Napoli (predicted)	201810037		2018	France	France	Pays-de-la-Loire	49	49070	FRG02	No Travel declared	Human	Stool	10	29	Female	84	Isolated	SAL_ZA6636AA	SAL_SB2982AA_AS	474	60	161	147	96	178	155	12	142	204740	204740	204740	204740	124002	124002	27729	27729	27729	1543	1543a	N2	1289	104	2		wild_type	ERR16083664		This study
S. enterica	Napoli (predicted)	201810068		2018	France	France	Pays-de-la-Loire	44	44700	FRG01		Human	Stool	11	2	Male	1		SAL_ZA6634AA	SAL_SB2980AA_AS	474	60	161	147	96	178	155	12	142	204738	204738	204738	140628	27733	27733	27733	27733	27729	1543	1543a	N2	1289	104	2		wild_type	ERR16083666		This study
S. enterica	Napoli (predicted)	201810381		2018	France	France	Pays-de-la-Loire	44	44360	FRG01	No Travel declared	Human	Stool	11	9	Male	63	Isolated	SAL_ZA6633AA	SAL_SB2979AA_AS	474	60	161	147	96	178	155	12	142	204737	204737	204737	204722	140749	130700	27729	27729	27729	1543	1543a	N2	1289	104	2		wild_type	ERR16083667		This study
S. enterica	Napoli (predicted)	201810708		2018	France	France	Nouvelle-Aquitaine	17	17260	FRI32		Human	Stool	11	22	Male	77	Isolated	SAL_ZA6632AA	SAL_SB2978AA_AS	474	60	161	147	96	178	155	12	142	204736	204736	204736	204736	140635	140604	27729	27729	27729	1543	1543a	N2	1289	104	2		wild_type	ERR16083669		This study
S. enterica	Napoli (predicted)	201810716		2018	France	France	Pays-de-la-Loire	44	44600	FRG01		Human	Stool	11	20	Female	23		SAL_ZA6630AA	SAL_SB2976AA_AS	474	60	161	147	96	178	155	12	142	204734	204734	204734	204734	140632	27733	27733	27733	27729	1543	1543a	N2	1289	104	2		wild_type	ERR16083670		This study
S. enterica	Napoli (predicted)	201810860		2018	France	France	Provence-Alpes-Cote-dAzur	06	06000	FRL03		Human	Stool	10	22	Female	9		SAL_ZA6631AA	SAL_SB2977AA_AS	474	60	161	147	96	178	155	12	142	204735	204735	204735	176236	176236	140577	26263	24950	1543	1543	1543b	N2	1289	104	2		wild_type	ERR16083671		This study
S. enterica	Napoli (predicted)	201810988		2018	France	France	Pays-de-la-Loire	44	44117	FRG01		Human	Stool	11	29	Male	< 1	Isolated	SAL_ZA6629AA	SAL_SB2975AA_AS	474	60	161	147	96	178	155	12	142	204733	204733	204733	204733	204733	27733	27733	27733	27729	1543	1543a	N2	1289	104	2		wild_type	ERR16083673		This study
S. enterica	Napoli (predicted)	A_19-0863	S19LNR0863	2019	France	France	Pays-de-la-Loire	85		FRG05		Environment	Poultry	7	18				SAL_HB8094AA	SAL_PC3220AA_AS	474	60	161	147	96	178	155	12	142	264043	264043	264043	264043	140671	140650	27729	27729	27729	1543	1543a	N2	1289	104	2		wild_type	ERR16061024		This study
S. enterica	Napoli (predicted)	A_19-0945	S19LNR0945	2019	France	France	Pays-de-la-Loire	53		FRG03		Environment	Poultry	8	25				SAL_HB8096AA	SAL_PC3222AA_AS	474	60	161	147	96	178	155	12	142	264026	264026	264026	264026	235439	140611	27729	27729	27729	1543	1543a	N2	1289	104	2		wild_type	ERR16061025		This study
S. enterica	Napoli (predicted)	A_19-1056	S19LNR1056	2019	France	France	Pays-de-la-Loire	49		FRG02		Environment	Poultry	10	7				SAL_HB8095AA	SAL_PC3221AA_AS	474	60	161	147	96	178	155	12	142	264024	264024	264024	264024	264024	140611	27729	27729	27729	1543	1543a	N2	1289	104	2		wild_type	ERR16061026		This study
S. enterica	Napoli (predicted)	A_19-1069	S19LNR1069	2019	France	France	Pays-de-la-Loire	72		FRG04		Environment	Poultry	8	5				SAL_HB8097AA	SAL_PC3223AA_AS	474	60	161	147	96	178	155	12	142	264029	264029	264029	264029	140649	140611	27729	27729	27729	1543	1543a	N2	1289	104	2		wild_type	ERR16061027		This study
S. enterica	Napoli (predicted)	A_19-1175	S19LNR1175	2019	France	France	Pays-de-la-Loire	49		FRG02		Environment	Poultry	4	8				SAL_HB8099AA	SAL_PC3225AA_AS	474	60	161	147	96	178	155	12	142	264027	264027	264027	264027	124002	124002	27729	27729	27729	1543	1543a	N2	1289	104	2		wild_type	ERR16061028		This study
S. enterica	Napoli (predicted)	A_19-1196	S19LNR1196	2019	France	France	Pays-de-la-Loire	44		FRG01		Environment	Poultry	5	13				SAL_HB8098AA	SAL_PC3224AA_AS	474	60	161	147	96	178	155	12	142	264030	264030	264030	264030	264030	140597	27729	27729	27729	1543	1543a	N2	1289	104	2		wild_type	ERR16061029		This study
S. enterica	Napoli (predicted)	A_19-1532	S19LNR1532	2019	France	France	Centre_Val-de-Loire	37		FRB04		Environment	Poultry	11	4				SAL_HB8100AA	SAL_PC3226AA_AS	474	60	161	147	96	178	155	12	142	264031	264031	264031	264031	216231	140652	27729	27729	27729	1543	1543a	N2	1289	104	2		wild_type	ERR16061030		This study
S. enterica	Napoli (predicted)	A_19-1939	S19LNR1939	2019	France	France	Bretagne	35		FRH03		Environment	Poultry	11	26				SAL_HB8101AA	SAL_PC3227AA_AS	474	60	161	147	96	178	155	12	142	264044	264044	204682	204682	204671	140611	27729	27729	27729	1543	1543a	N2	1289	104	2		wild_type	ERR16061031		This study
S. enterica	Napoli (predicted)	A_19-2003	S19LNR2003	2019	France	France	Nouvelle-Aquitaine	79		FRI33		Environment	Poultry	10	24				SAL_HB8093AA	SAL_PC3219AA_AS	474	60	161	147	96	178	155	12	142	264042	264042	264042	264042	264034	27729	27729	27729	27729	1543	1543a	N2	1289	104	2		wild_type	ERR16061032		This study
S. enterica	Napoli (predicted)	A_19-2070	S19LNR2070	2019	France	France	Pays-de-la-Loire	44		FRG01		Environment	Poultry	12	23				SAL_HB8091AA	SAL_PC3217AA_AS	474	60	161	147	96	178	155	12	142	264025	264025	264025	264025	264025	176234	27729	27729	27729	1543	1543a	N2	1289	104	2		wild_type	ERR16061033		This study
S. enterica	Napoli (predicted)	A_19-2161	S19LNR2161	2019	France	France	Bretagne	56		FRH04		Environment	Poultry	11	26				SAL_HB8090AA	SAL_PC3216AA_AS	474	60	161	147	96	178	155	12	142	264036	264036	264036	264036	140626	140626	140618	27729	27729	1543	1543a	N2	1289	104	2		wild_type	ERR16061034		This study
S. enterica	Napoli (predicted)	201900300		2019	France	France	Pays-de-la-Loire	85	85660	FRG05		Human	Stool	1	5	Male	< 1	Isolated	SAL_ZA6627AA	SAL_SB2973AA_AS	474	60	161	147	96	178	155	12	142	204730	204730	204730	204730	124002	124002	27729	27729	27729	1543	1543a	N2	1289	104	2		wild_type	ERR16083675		This study
S. enterica	Napoli (predicted)	201901813		2019	France	France	Pays-de-la-Loire	44	44680	FRG01		Human	Stool	3	21	Female	< 1	Isolated	SAL_ZA6626AA	SAL_SB2972AA_AS	474	60	161	147	96	178	155	12	142	204731	204731	204731	204685	27733	27733	27733	27733	27729	1543	1543a	N2	1289	104	2		wild_type	ERR16083676		This study
S. enterica	Napoli (predicted)	201902189		2019	France	France	Pays-de-la-Loire	85	85200	FRG05		Human	Urine	4	1	Female	83	Isolated	SAL_ZA6623AA	SAL_SB2955AA_AS	474	60	161	147	96	178	155	12	142	204727	204727	204727	204727	140671	140650	27729	27729	27729	1543	1543a	N2	1289	104	2		wild_type	ERR16083677		This study
S. enterica	Napoli (predicted)	201902281		2019	France	France	Nouvelle-Aquitaine	23	23210	FRI21		Human	Stool	4	3	Male	5	Isolated	SAL_ZA6624AA	SAL_SB2956AA_AS	474	60	161	147	96	178	155	12	142	204729	204729	204729	204729	204729	176319	27733	27733	27729	1543	1543a	N2	1289	104	2		wild_type	ERR16083678		This study
S. enterica	Napoli (predicted)	201902480		2019	France	France	Nouvelle-Aquitaine	47	47300	FRI14		Human	Stool	4	10	Male	89	Isolated	SAL_ZA6621AA	SAL_SB2953AA_AS	474	60	161	147	96	178	155	12	142	204728	204728	204728	140728	140728	27733	27733	27733	27729	1543	1543a	N2	1289	104	2		wild_type	ERR16083679		This study
S. enterica	Napoli (predicted)	201902491		2019	France	France	Pays-de-la-Loire	49	49125	FRG02	No Travel declared	Human	Stool	4	11	Male	2	Isolated	SAL_ZA6622AA	SAL_SB2954AA_AS	474	60	161	147	96	178	155	12	142	204725	204725	204725	204725	204725	124002	27729	27729	27729	1543	1543a	N2	1289	104	2		wild_type	ERR16083680		This study
S. enterica	Napoli (predicted)	201902925		2019	France	France	Bretagne	35	35000	FRH03		Human	Stool	4	26	Female	76	Isolated	SAL_ZA6620AA	SAL_SB2952AA_AS	474	60	161	147	96	178	155	12	142	204723	204723	204723	204723	27733	27733	27733	27733	27729	1543	1543a	N2	1289	104	2		wild_type	ERR16083681		This study
S. enterica	Napoli (predicted)	201903093		2019	France	France	Bretagne	56	56140	FRH04		Human	Stool	5	3	Female	86	Isolated	SAL_ZA6618AA	SAL_SB2950AA_AS	474	60	161	147	96	178	155	12	142	204722	204722	204722	204722	140749	130700	27729	27729	27729	1543	1543a	N2	1289	104	2		wild_type	ERR16083682		This study
S. enterica	Napoli (predicted)	201903191		2019	France	France	Ile-de-France	75	75008	FR101		Human	Stool	5	10	Male	1		SAL_ZA6619AA	SAL_SB2951AA_AS	474	60	161	147	96	178	155	12	142	204724	204724	204724	204664	204664	140654	140654	140654	27729	1543	1543a	N2	1289	104	2		wild_type	ERR16083683		This study
S. enterica	Napoli (predicted)	201903200		2019	France	France	Pays-de-la-Loire	49	49320	FRG02		Human	Stool	5	7	Male	1		SAL_ZA6617AA	SAL_SB2949AA_AS	474	60	161	147	96	178	155	12	142	204720	204720	204720	204720	204720	140611	27729	27729	27729	1543	1543a	N2	1289	104	2		wild_type	ERR16083684		This study
S. enterica	Napoli (predicted)	201903221		2019	France	France	Pays-de-la-Loire	49	49600	FRG02		Human	Urine	5	11	Female	57		SAL_ZA6616AA	SAL_SB2948AA_AS	474	60	161	147	96	178	155	12	142	204718	204718	204718	204718	140734	140653	27733	27733	27729	1543	1543a	N2	1289	104	2		wild_type	ERR16083685		This study
S. enterica	Napoli (predicted)	201903279		2019	France	France	Ile-de-France	75	75012	FR101		Human	Stool	5	13	Male	4		SAL_ZA6614AA	SAL_SB2946AA_AS	474	60	161	147	96	178	155	12	142	204721	204721	204721	204721	204671	140611	27729	27729	27729	1543	1543a	N2	1289	104	2		wild_type	ERR16083686		This study
S. enterica	Napoli (predicted)	201903288		2019	France	France	Pays-de-la-Loire	49		FRG02		Human	Blood	5	11	Male	67		SAL_ZA6613AA	SAL_SB2945AA_AS	474	60	161	147	96	178	155	12	142	204715	204715	204715	204715	140608	27733	27733	27733	27729	1543	1543a	N2	1289	104	2		wild_type	ERR16083687		This study
S. enterica	Napoli (predicted)	201903293		2019	France	Italy	Provence-Alpes-Cote-dAzur	83	83170	FRL05		Human	Stool	5	13	Male	81	Isolated	SAL_ZA6615AA	SAL_SB2947AA_AS	2019	60	161	147	348	178	155	12	142	204719	204719	204719	106986	106986	106986	20425	7673	7673	7673	7673	N1	1289	104	2		wild_type	ERR16083688		This study
S. enterica	Napoli (predicted)	201903309		2019	France	France	Nouvelle-Aquitaine	86	86140	FRI34	No Travel declared	Human	Stool	5	11	Female	63	Isolated	SAL_ZA6612AA	SAL_SB2944AA_AS	474	60	161	147	96	178	155	12	142	204714	204714	204714	204714	204714	140611	27729	27729	27729	1543	1543a	N2	1289	104	2		wild_type	ERR16083689		This study
S. enterica	Napoli (predicted)	201903342		2019	France	France	Grand-Est	68		FRF12		Human	Stool	5	6	Male	13		SAL_ZA6611AA	SAL_SB2943AA_AS	474	60	161	147	96	178	155	12	142	204713	204713	204713	204713	140601	107128	97218	24950	1543	1543	1543b	N2	1289	104	2		wild_type	ERR16083690		This study
S. enterica	Napoli (predicted)	201903516		2019	France	France	Pays-de-la-Loire	49	49160	FRG02		Human	Colic_Biospy	5	20	Male	66	Isolated	SAL_ZA6610AA	SAL_SB2942AA_AS	474	60	161	147	96	178	155	12	142	204716	204716	204716	204716	204716	204716	27729	27729	27729	1543	1543a	N2	1289	104	2		wild_type	ERR16083691		This study
S. enterica	Napoli (predicted)	201903524		2019	France	France	Nouvelle-Aquitaine	17	17139	FRI32		Human	Stool	5	21	Female	1	Isolated	SAL_ZA6609AA	SAL_SB2927AA_AS	474	60	161	147	96	178	155	12	142	204712	204712	204712	204712	204712	140604	27729	27729	27729	1543	1543a	N2	1289	104	2		wild_type	ERR16083692		This study
S. enterica	Napoli (predicted)	201903568		2019	France	France	Bretagne	35	35370	FRH03		Human	Stool	5	20	Female	3	Isolated	SAL_ZA6608AA	SAL_SB2926AA_AS	474	60	161	147	96	178	155	12	142	204711	204711	204711	204711	204711	204711	27729	27729	27729	1543	1543a	N2	1289	104	2		wild_type	ERR16083693		This study
S. enterica	Napoli (predicted)	201903594		2019	France	France	Pays-de-la-Loire	44	44119	FRG01	No Travel declared	Human	Stool	5	22	Male	44	Isolated	SAL_ZA6607AA	SAL_SB2925AA_AS	474	60	161	147	96	178	155	12	142	204717	204717	204717	204717	124002	124002	27729	27729	27729	1543	1543a	N2	1289	104	2		wild_type	ERR16083694		This study
S. enterica	Napoli (predicted)	201903731		2019	France	France	Pays-de-la-Loire	44	44350	FRG01		Human	Stool	5	29	Female	19		SAL_ZA6604AA	SAL_SB2922AA_AS	474	60	161	147	96	178	155	12	142	204708	204708	204708	204708	140647	27733	27733	27733	27729	1543	1543a	N2	1289	104	2		wild_type	ERR16083695		This study
S. enterica	Napoli (predicted)	201903752		2019	France	France	Pays-de-la-Loire	85	85510	FRG05		Human	Stool	5	31	Female	2	Other group of cases	SAL_ZA6606AA	SAL_SB2924AA_AS	474	60	161	147	96	178	155	12	142	204709	204709	204709	204709	140734	140653	27733	27733	27729	1543	1543a	N2	1289	104	2		wild_type	ERR16083696		This study
S. enterica	Napoli (predicted)	201903755		2019	France	France	Grand-Est	67	67380	FRF11		Human	Stool	5	27	Male	5	Isolated	SAL_ZA6605AA	SAL_SB2923AA_AS	474	60	161	147	96	178	155	12	142	204707	204707	204707	204707	140601	107128	97218	24950	1543	1543	1543b	N2	1289	104	2		wild_type	ERR16083697		This study
S. enterica	Napoli (predicted)	201903759		2019	France	France	Pays-de-la-Loire	44	44140	FRG01	No Travel declared	Human	Stool	5	28	Female	69	Isolated	SAL_ZA6602AA	SAL_SB2920AA_AS	474	60	161	147	96	178	155	12	142	204706	204706	204706	204688	124002	124002	27729	27729	27729	1543	1543a	N2	1289	104	2		wild_type	ERR16083698		This study
S. enterica	Napoli (predicted)	201904025		2019	France	France	Bourgogne_Franche-Comté	39		FRC22		Human	Stool	6	12	Female	2	Isolated	SAL_ZA6603AA	SAL_SB2921AA_AS	474	60	161	147	96	178	155	12	142	204710	204710	204710	204710	204710	204710	140588	140588	140575	1543	1543a	N2	1289	104	2		wild_type	ERR16083699		This study
S. enterica	Napoli (predicted)	201904064		2019	France	France	Grand-Est	68	68270	FRF12		Human	Blood	6	11	Male	5	Isolated	SAL_ZA6601AA	SAL_SB2919AA_AS	474	60	161	147	96	178	155	12	142	204705	204705	204705	140601	140601	107128	97218	24950	1543	1543	1543b	N2	1289	104	2		wild_type	ERR16083700		This study
S. enterica	Napoli (predicted)	201904092		2019	France	France	Centre_Val-de-Loire	18		FRB01	No Travel declared	Human	Stool	6	12	Female	1	Isolated	SAL_ZA6600AA	SAL_SB2918AA_AS	474	60	161	147	96	178	155	12	142	204704	204704	204704	204704	204704	140652	27729	27729	27729	1543	1543a	N2	1289	104	2		wild_type	ERR16083701		This study
S. enterica	Napoli (predicted)	201904169		2019	France	France	Pays-de-la-Loire	49		FRG02		Human	Stool	6	17	Male	63	Isolated	SAL_ZA6599AA	SAL_SB2917AA_AS	474	60	161	147	96	178	155	12	142	204703	204703	204703	140603	124002	124002	27729	27729	27729	1543	1543a	N2	1289	104	2		wild_type	ERR16083702		This study
S. enterica	Napoli (predicted)	201904187		2019	France	France	Nouvelle-Aquitaine	19	19270	FRI21		Human	Blood	6	15	Female	72	Isolated	SAL_ZA6598AA	SAL_SB2916AA_AS	474	60	161	147	96	178	155	12	142	204701	204701	204701	204701	204701	140580	27733	27733	27729	1543	1543a	N2	1289	104	2		wild_type	ERR16083703		This study
S. enterica	Napoli (predicted)	201904213		2019	France	France	Centre_Val-de-Loire	45		FRB06		Human	Stool	6	14	Male	83		SAL_ZA6597AA	SAL_SB2901AA_AS	474	60	161	147	96	178	155	12	142	204698	204698	204698	204698	204698	140686	27729	27729	27729	1543	1543a	N2	1289	104	2		wild_type	ERR16083704		This study
S. enterica	Napoli (predicted)	201904222		2019	France	France	Nouvelle-Aquitaine	16	16100	FRI31		Human	Stool	6	18	Female	87		SAL_ZA6596AA	SAL_SB2900AA_AS	474	60	161	147	96	178	155	12	142	204702	204702	204702	204702	204702	204692	27733	27733	27729	1543	1543a	N2	1289	104	2		wild_type	ERR16083705		This study
S. enterica	Napoli (predicted)	201904257		2019	France	France	Bretagne	29	29300	FRH02		Human	Stool	6	21	Male	69	Isolated	SAL_ZA6594AA	SAL_SB2895AA_AS	474	60	161	147	96	178	155	12	142	204693	204693	204693	204693	140626	140626	140618	27729	27729	1543	1543a	N2	1289	104	2		wild_type	ERR16083706		This study
S. enterica	Napoli (predicted)	201904314		2019	France	France	Nouvelle-Aquitaine	16	16200	FRI31		Human	Stool	6	21	Female	89		SAL_ZA6592AA	SAL_SB2893AA_AS	474	60	161	147	96	178	155	12	142	204692	204692	204692	204692	204692	204692	27733	27733	27729	1543	1543a	N2	1289	104	2		wild_type	ERR16083707		This study
S. enterica	Napoli (predicted)	201904316		2019	France	France	Pays-de-la-Loire	49	49230	FRG02		Human	Stool	6	20	Female	62	Isolated	SAL_ZA6589AA	SAL_SB2890AA_AS	474	60	161	147	96	178	155	12	142	204699	204699	204699	204699	124002	124002	27729	27729	27729	1543	1543a	N2	1289	104	2		wild_type	ERR16083708		This study
S. enterica	Napoli (predicted)	201904468		2019	France	France	Nouvelle-Aquitaine	87	87500	FRI23		Human	Stool	6	27	Male	5	Isolated	SAL_ZA6588AA	SAL_SB2889AA_AS	474	60	161	147	96	178	155	12	142	204690	204690	204690	204690	204690	140580	27733	27733	27729	1543	1543a	N2	1289	104	2		wild_type	ERR16083709		This study
S. enterica	Napoli (predicted)	201904520		2019	France	France	Nouvelle-Aquitaine	24	24470	FRI11		Human	Stool	6	28	Male	67	Family	SAL_ZA6587AA	SAL_SB2888AA_AS	474	60	161	147	96	178	155	12	142	204689	204689	204689	204689	140735	140702	27733	27733	27729	1543	1543a	N2	1289	104	2		wild_type	ERR16083710		This study
S. enterica	Napoli (predicted)	201904600		2019	France	France	Pays-de-la-Loire	85	85300	FRG05		Human	Stool	7	1	Female	60	Isolated	SAL_ZA6586AA	SAL_SB2887AA_AS	474	60	161	147	96	178	155	12	142	204696	204687	204687	204687	204687	140587	140587	27729	27729	1543	1543a	N2	1289	104	2		wild_type	ERR16083711		This study
S. enterica	Napoli (predicted)	201904613		2019	France	France	Nouvelle-Aquitaine	24	24470	FRI11		Human	Stool	7	2	Female	68	Isolated	SAL_ZA6585AA	SAL_SB2886AA_AS	474	60	161	147	96	178	155	12	142	204695	204695	204695	204689	140735	140702	27733	27733	27729	1543	1543a	N2	1289	104	2		wild_type	ERR16083712		This study
S. enterica	Napoli (predicted)	201904695		2019	France	France	Occitanie	09	09290	FRJ21	Travel_to_Brazil	Human	Stool	7	2	Male	36	Isolated	SAL_ZA6584AA	SAL_SB2885AA_AS	474	60	161	147	96	178	155	12	142	204688	204688	204688	204688	124002	124002	27729	27729	27729	1543	1543a	N2	1289	104	2		wild_type	ERR16083713		This study
S. enterica	Napoli (predicted)	201904698		2019	France		Provence-Alpes-Cote-dAzur	06	06000	FRL03		Human	Blood	6	30	Male	78		SAL_ZA6583AA	SAL_SB2884AA_AS	2019	60	161	147	348	178	155	12	142	204691	204691	204691	204691	204691	204691	20426	20426	7673	7673	7673	N1	1289	104	2		wild_type	ERR16083714		This study
S. enterica	Napoli (predicted)	201904699		2019	France	France	Pays-de-la-Loire	85	85300	FRG05		Human	Stool	7	4	Male	62	Family	SAL_ZA6582AA	SAL_SB2883AA_AS	474	60	161	147	96	178	155	12	142	204687	204687	204687	204687	204687	140587	140587	27729	27729	1543	1543a	N2	1289	104	2		wild_type	ERR16083715		This study
S. enterica	Napoli (predicted)	201904700		2019	France	France	Pays-de-la-Loire	44	44640	FRG01		Human	Stool	7	4	Male	11	Isolated	SAL_ZA6581AA	SAL_SB2868AA_AS	474	60	161	147	96	178	155	12	142	204685	204685	204685	204685	27733	27733	27733	27733	27729	1543	1543a	N2	1289	104	2		wild_type	ERR16083716		This study
S. enterica	Napoli (predicted)	201904704		2019	France	France	Pays-de-la-Loire	85		FRG05	No Travel declared	Human	Blood	7	7	Male	62	Isolated	SAL_ZA6580AA	SAL_SB2867AA_AS	474	60	161	147	96	178	155	12	142	204686	204686	140665	140665	140665	140604	27729	27729	27729	1543	1543a	N2	1289	104	2		wild_type	ERR16083717		This study
S. enterica	Napoli (predicted)	201904705		2019	France	France	Grand-Est	10	10130	FRF22		Human	Stool	7	7	Female	< 1	Isolated	SAL_ZA6579AA	SAL_SB2866AA_AS	474	60	161	147	96	178	155	12	142	204684	204684	204684	204684	27733	27733	27733	27733	27729	1543	1543a	N2	1289	104	2		wild_type	ERR16083718		This study
S. enterica	Napoli (predicted)	201904710		2019	France	France	Pays-de-la-Loire	85		FRG05	No Travel declared	Human	Stool	7	5	Male	9	Isolated	SAL_ZA6578AA	SAL_SB2865AA_AS	474	60	161	147	96	178	155	12	142	204683	204683	204683	204683	140659	140659	27733	27733	27729	1543	1543a	N2	1289	104	2		wild_type	ERR16083719		This study
S. enterica	Napoli (predicted)	201904748		2019	France	France	Pays-de-la-Loire	44	44430	FRG01	No Travel declared	Human	Stool	7	5	Male	84	Isolated	SAL_ZA6577AA	SAL_SB2864AA_AS	474	60	161	147	96	178	155	12	142	204681	204681	204681	204681	124002	124002	27729	27729	27729	1543	1543a	N2	1289	104	2		wild_type	ERR16083720		This study
S. enterica	Napoli (predicted)	201904846		2019	France	France	Nouvelle-Aquitaine	87	87220	FRI23		Human	Stool	7	8	Female	89	Isolated	SAL_ZA6576AA	SAL_SB2863AA_AS	474	60	161	147	96	178	155	12	142	204679	204679	204679	204679	204679	176319	27733	27733	27729	1543	1543a	N2	1289	104	2		wild_type	ERR16083721		This study
S. enterica	Napoli (predicted)	201904878		2019	France	France	Grand-Est	68	68570	FRF12		Human	Stool	7	9	Female	12	Isolated	SAL_ZA6573AA	SAL_SB2846AA_AS	474	60	161	147	96	178	155	12	142	204676	204676	204676	140601	140601	107128	97218	24950	1543	1543	1543b	N2	1289	104	2		wild_type	ERR16083722		This study
S. enterica	Napoli (predicted)	201904915		2019	France	France	Grand-Est	68	68300	FRF12		Human	Stool	7	9	Male	81		SAL_ZA6574AA	SAL_SB2847AA_AS	474	60	161	147	96	178	155	12	142	204678	204678	204678	204678	140601	107128	97218	24950	1543	1543	1543b	N2	1289	104	2		wild_type	ERR16083723		This study
S. enterica	Napoli (predicted)	201904929		2019	France	France	Pays-de-la-Loire	44	44530	FRG01		Human	Blood	6	25	Male	72	Isolated	SAL_ZA6572AA	SAL_SB2845AA_AS	474	60	161	147	96	178	155	12	142	204675	204675	204675	204675	27733	27733	27733	27733	27729	1543	1543a	N2	1289	104	2		wild_type	ERR16083724		This study
S. enterica	Napoli (predicted)	201904930		2019	France	France	Pays-de-la-Loire	44	44200	FRG01	No Travel declared	Human	Stool	7	4	Female	64	Isolated	SAL_ZA6570AA	SAL_SB2843AA_AS	474	60	161	147	96	178	155	12	142	204673	204673	204673	204673	124002	124002	27729	27729	27729	1543	1543a	N2	1289	104	2		wild_type	ERR16083725		This study
S. enterica	Napoli (predicted)	201905136		2019	France	France	Pays-de-la-Loire	49	49170	FRG02		Human	Stool	7	15	Male	19	Isolated	SAL_ZA6567AA	SAL_SB2840AA_AS	474	60	161	147	96	178	155	12	142	204670	204670	204670	204670	204670	140611	27729	27729	27729	1543	1543a	N2	1289	104	2		wild_type	ERR16083727		This study
S. enterica	Napoli (predicted)	201905137		2019	France	France	Nouvelle-Aquitaine	79	79310	FRI33	No Travel declared	Human	Stool	7	16	Female	4	Isolated	SAL_ZA6569AA	SAL_SB2842AA_AS	474	60	161	147	96	178	155	12	142	204672	204672	204672	204672	204672	204672	27729	27729	27729	1543	1543a	N2	1289	104	2		wild_type	ERR16083728		This study
S. enterica	Napoli (predicted)	201905147		2019	France	France	Ile-de-France	91	91370	FR104		Human	Stool	7	18	Female	2	Isolated	SAL_ZA6568AA	SAL_SB2841AA_AS	5170	60	161	781	96	178	155	12	142	204674	204674	204674	204674	204674	140673	140673	140623	27729	1543	1543a	N2	1289	104	2		wild_type	ERR16083729		This study
S. enterica	Napoli (predicted)	201905155		2019	France	France	Nouvelle-Aquitaine	17	17000	FRI32	No Travel declared	Human	Stool	7	18	Male	< 1	Isolated	SAL_ZA6566AA	SAL_SB2839AA_AS	5170	60	161	781	96	178	155	12	142	204677	204677	204677	204658	204658	204658	140623	140623	27729	1543	1543a	N2	1289	104	2		wild_type	ERR16083730		This study
S. enterica	Napoli (predicted)	201905181		2019	France	France	Occitanie	12		FRJ22		Human	Blood	7	17	Male	73		SAL_ZA6565AA	SAL_SB2838AA_AS	474	60	161	147	96	178	155	12	142	204666	204666	204666	204666	204666	204666	140588	140588	140575	1543	1543a	N2	1289	104	2		wild_type	ERR16083731		This study
S. enterica	Napoli (predicted)	201905188		2019	France	France	Bretagne	35	35134	FRH03		Human	Stool	7	21	Male	1		SAL_ZA6563AA	SAL_SB2836AA_AS	474	60	161	147	96	178	155	12	142	204671	204671	204671	204671	204671	140611	27729	27729	27729	1543	1543a	N2	1289	104	2		wild_type	ERR16083732		This study
S. enterica	Napoli (predicted)	201905203		2019	France	France	Nouvelle-Aquitaine	87	87260	FRI23		Human	Stool	7	17	Male	31	Isolated	SAL_ZA6564AA	SAL_SB2837AA_AS	474	60	161	147	96	178	155	12	142	204667	204667	204667	204667	204667	176319	27733	27733	27729	1543	1543a	N2	1289	104	2		wild_type	ERR16083733		This study
S. enterica	Napoli (predicted)	201905208		2019	France	France	Auvergne_Rhône-Alpes	03		FRK11		Human	Stool	7	19	Male	4		SAL_ZA6562AA	SAL_SB2835AA_AS	5168	60	161	147	96	1085	155	12	142	204663	204663	204663	204663	204661	140684	140575	140575	140575	1543	1543a	N2	1289	104	2		wild_type	ERR16083734		This study
S. enterica	Napoli (predicted)	201905227		2019	France	France	Nouvelle-Aquitaine	17	17580	FRI32		Human	Stool	7	17	Male	41	Isolated	SAL_ZA6516AA	SAL_SB2651AA_AS	5170	60	161	781	96	178	155	12	142	204625	204625	204625	204625	204625	204625	140623	140623	27729	1543	1543a	N2	1289	104	2		wild_type	ERR16083735		This study
S. enterica	Napoli (predicted)	201905284		2019	France	France	Pays-de-la-Loire	85	85570	FRG05	No Travel declared	Human	Stool	7	19	Female	62	Isolated	SAL_ZA6561AA	SAL_SB2834AA_AS	474	60	161	147	96	178	155	12	142	204662	204662	204662	204662	204662	140597	27729	27729	27729	1543	1543a	N2	1289	104	2		wild_type	ERR16083736		This study
S. enterica	Napoli (predicted)	201905288		2019	France	France	Ile-de-France	78	78711	FR103		Human	Stool	7	19	Male	< 1		SAL_ZA6560AA	SAL_SB2833AA_AS	5168	60	161	147	96	1085	155	12	142	204661	204661	204661	204661	204661	140684	140575	140575	140575	1543	1543a	N2	1289	104	2		wild_type	ERR16083737		This study
S. enterica	Napoli (predicted)	201905374		2019	France	France	Bourgogne_Franche-Comté	90	90300	FRC24	No Travel declared	Human	Stool	7	25	Male	9	Isolated	SAL_ZA6555AA	SAL_SB2814AA_AS	474	60	161	147	96	178	155	12	142	204659	204659	204659	204659	140601	107128	97218	24950	1543	1543	1543b	N2	1289	104	2		wild_type	ERR16083738		This study
S. enterica	Napoli (predicted)	201905411		2019	France	Italy	Auvergne_Rhône-Alpes	63	63190	FRK14		Human	Stool	7	24	Female	28		SAL_ZA6559AA	SAL_SB2818AA_AS	2008	60	161	147	348	178	155	436	142	204668	204668	204668	204668	204668	20408	7673	7673	7673	7673	7673	N1	1289	104	2		wild_type	ERR16083739		This study
S. enterica	Napoli (predicted)	201905412		2019	France	France	Nouvelle-Aquitaine	17	17230	FRI32		Human	Stool	7	23	Female	1	Isolated	SAL_ZA6556AA	SAL_SB2815AA_AS	5170	60	161	781	96	178	155	12	142	204669	204669	204669	204669	204669	204669	140673	140623	27729	1543	1543a	N2	1289	104	2		wild_type	ERR16083740		This study
S. enterica	Napoli (predicted)	201905504		2019	France	France	Pays-de-la-Loire	85	85500	FRG05	No Travel declared	Human	Stool	7	27	Male	< 1	Isolated	SAL_ZA6557AA	SAL_SB2816AA_AS	474	60	161	147	96	178	155	12	142	204660	204660	204660	204660	204660	204660	27729	27729	27729	1543	1543a	N2	1289	104	2		wild_type	ERR16083741		This study
S. enterica	Napoli (predicted)	201905522		2019	France	France	Pays-de-la-Loire	85	85230	FRG05		Human	Stool	7	29	Female	8	Isolated	SAL_ZA6553AA	SAL_SB2812AA_AS	474	60	161	147	96	178	155	12	142	204664	204664	204664	204664	204664	140654	140654	140654	27729	1543	1543a	N2	1289	104	2		wild_type	ERR16083742		This study
S. enterica	Napoli (predicted)	201905571		2019	France	France	Nouvelle-Aquitaine	33	33240	FRI12	No Travel declared	Human	Stool	7	27	Male	1	Isolated	SAL_ZA6552AA	SAL_SB2811AA_AS	5168	60	161	147	96	1085	155	12	142	204657	204657	204657	204657	204657	204657	140575	140575	140575	1543	1543a	N2	1289	104	2		wild_type	ERR16083743		This study
S. enterica	Napoli (predicted)	201905576		2019	France	France	Nouvelle-Aquitaine	23	23122 n'existe pas ou 23120	FRI22		Human	Blood	7	29	Male	75	Isolated	SAL_ZA6550AA	SAL_SB2809AA_AS	474	60	161	147	96	178	155	12	142	204656	204656	204656	204656	204656	140653	27733	27733	27729	1543	1543a	N2	1289	104	2		wild_type	ERR16083744		This study
S. enterica	Napoli (predicted)	201905580		2019	France	France	Provence-Alpes-Cote-dAzur	84	84320	FRL06		Human	Stool	7	31	Male	19		SAL_ZA6551AA	SAL_SB2810AA_AS	474	60	161	147	96	178	155	12	142	204655	204655	204655	204655	204655	204655	107042	24950	1543	1543	1543b	N2	1289	104	2		wild_type	ERR16083745		This study
S. enterica	Napoli (predicted)	201905582		2019	France	France	Pays-de-la-Loire	44	44119	FRG01		Human	Stool	7	29	Male	1		SAL_ZA6549AA	SAL_SB2808AA_AS	474	60	161	147	96	178	155	12	142	204654	204654	204654	204654	124002	124002	27729	27729	27729	1543	1543a	N2	1289	104	2		wild_type	ERR16083746		This study
S. enterica	Napoli (predicted)	201905585		2019	France	France	Ile-de-France	78	78157 (LAM)	FR103		Human	Stool	7		Male	< 1		SAL_MB8018AA	SAL_VC2000AA_AS	474	60	161	147	96	178	155	12	142	312247	204686	140665	140665	140665	140604	27729	27729	27729	1543	1543a	N2	1289	104	2		wild_type	ERR16083747		This study
S. enterica	Napoli (predicted)	201905587		2019	France	France	Nouvelle-Aquitaine	17	17138	FRI32		Human	Stool	7	30	Male	17		SAL_ZA6548AA	SAL_SB2807AA_AS	5170	60	161	781	96	178	155	12	142	204658	204658	204658	204658	204658	204658	140623	140623	27729	1543	1543a	N2	1289	104	2		wild_type	ERR16083748		This study
S. enterica	Napoli (predicted)	201905596		2019	France	France	Nouvelle-Aquitaine	86	86240	FRI34		Human	Stool	7	29	Male	74		SAL_ZA6547AA	SAL_SB2806AA_AS	474	60	161	147	96	178	155	12	142	204651	204651	204651	204651	204651	140650	27729	27729	27729	1543	1543a	N2	1289	104	2		wild_type	ERR16083749		This study
S. enterica	Napoli (predicted)	201905611		2019	France	France	Nouvelle-Aquitaine	87	87200	FRI23		Human	Stool	7	29	Female	81	Isolated	SAL_ZA6546AA	SAL_SB2805AA_AS	474	60	161	147	96	178	155	12	142	204650	204650	204650	204650	204650	140653	27733	27733	27729	1543	1543a	N2	1289	104	2		wild_type	ERR16083750		This study
S. enterica	Napoli (predicted)	201905685		2019	France	France	Nouvelle-Aquitaine	33	33500	FRI12		Human	Stool	8	2	Male	69	Isolated	SAL_ZA6545AA	SAL_SB2804AA_AS	474	60	161	147	96	178	155	12	142	204649	204649	204649	204649	140586	140586	27733	27733	27729	1543	1543a	N2	1289	104	2		wild_type	ERR16083751		This study
S. enterica	Napoli (predicted)	201905711		2019	France	France	Nouvelle-Aquitaine	87	87350	FRI23		Human	Stool	8	2	Male	74	Isolated	SAL_ZA6544AA	SAL_SB2789AA_AS	474	60	161	147	96	178	155	12	142	204653	204653	204653	204653	204653	176319	27733	27733	27729	1543	1543a	N2	1289	104	2		wild_type	ERR16083752		This study
S. enterica	Napoli (predicted)	201905714		2019	France	France	Grand-Est	68	68520	FRF12		Human	Stool	7	31	Female	4		SAL_ZA6543AA	SAL_SB2788AA_AS	474	60	161	147	96	178	155	12	142	204648	204648	204648	140601	140601	107128	97218	24950	1543	1543	1543b	N2	1289	104	2		wild_type	ERR16083753		This study
S. enterica	Napoli (predicted)	201905772		2019	France	France	Nouvelle-Aquitaine	16	16100	FRI31		Human	Stool	8	1	Male	72		SAL_ZA6542AA	SAL_SB2787AA_AS	474	60	161	147	96	178	155	12	142	204646	204646	204646	204646	140750	140591	27733	27733	27729	1543	1543a	N2	1289	104	2		wild_type	ERR16083754		This study
S. enterica	Napoli (predicted)	201905774		2019	France	France	Nouvelle-Aquitaine	47		FRI14		Human	Stool	8	1	Female	11		SAL_ZA6541AA	SAL_SB2786AA_AS	5168	60	161	147	96	1085	155	12	142	204645	204645	204645	204645	204645	176347	176347	140575	140575	1543	1543a	N2	1289	104	2		wild_type	ERR16083755		This study
S. enterica	Napoli (predicted)	201905798		2019	France	France	Pays-de-la-Loire	85	85150	FRG05		Human	Stool	8	1	Female	68	Isolated	SAL_ZA6540AA	SAL_SB2785AA_AS	474	60	161	147	96	178	155	12	142	204644	204644	204644	140665	140665	140604	27729	27729	27729	1543	1543a	N2	1289	104	2		wild_type	ERR16083756		This study
S. enterica	Napoli (predicted)	201905818		2019	France	France	Pays-de-la-Loire	85	85110	FRG05	No Travel declared	Human	Stool	8	3	Female	69	Family	SAL_ZA6539AA	SAL_SB2784AA_AS	474	60	161	147	96	178	155	12	142	204643	204643	204643	204643	204643	204643	27729	27729	27729	1543	1543a	N2	1289	104	2		wild_type	ERR16083757		This study
S. enterica	Napoli (predicted)	201905859		2019	France	France	Grand-Est	68	68120	FRF12		Human	Stool	8	3	Male	82	Isolated	SAL_ZA6538AA	SAL_SB2783AA_AS	474	60	161	147	96	178	155	12	142	204652	204614	204614	204614	140601	107128	97218	24950	1543	1543	1543b	N2	1289	104	2		wild_type	ERR16083758		This study
S. enterica	Napoli (predicted)	201905864		2019	France	France	Pays-de-la-Loire	44	44400	FRG01		Human	Stool	8	1	Female	95		SAL_ZA6537AA	SAL_SB2782AA_AS	474	60	161	147	96	178	155	12	142	204642	204642	204642	204642	204642	140760	140587	27729	27729	1543	1543a	N2	1289	104	2	blaTEM-1,aadA5,sul2,dfrA17,tet(A)	wild_type	ERR16083759		This study
S. enterica	Napoli (predicted)	201905869		2019	France	France	Pays-de-la-Loire	44	44522	FRG01	No Travel declared	Human	Stool	8	2	Male	7	Isolated	SAL_ZA6536AA	SAL_SB2781AA_AS	474	60	161	147	96	178	155	12	142	204641	204641	204641	204641	124002	124002	27729	27729	27729	1543	1543a	N2	1289	104	2		wild_type	ERR16083760		This study
S. enterica	Napoli (predicted)	201905887		2019	France	France	Pays-de-la-Loire	85	85220	FRG05		Human	Stool	8	5	Male	74		SAL_ZA6534AA	SAL_SB2779AA_AS	474	60	161	147	96	178	155	12	142	204647	204647	204647	204647	27733	27733	27733	27733	27729	1543	1543a	N2	1289	104	2		wild_type	ERR16083761		This study
S. enterica	Napoli (predicted)	201905889		2019	France	France	Pays-de-la-Loire	85	85350	FRG05		Human	Stool	8	5	Male	75		SAL_ZA6535AA	SAL_SB2780AA_AS	474	60	161	147	96	178	155	12	142	204639	204639	204639	204639	204639	140604	27729	27729	27729	1543	1543a	N2	1289	104	2		wild_type	ERR16083762		This study
S. enterica	Napoli (predicted)	201905895		2019	France	France	Pays-de-la-Loire	44	44360	FRG01		Human	Stool	8	4	Female	1		SAL_ZA6533AA	SAL_SB2778AA_AS	474	60	161	147	96	178	155	12	142	204640	204640	204640	204640	204640	140597	27729	27729	27729	1543	1543a	N2	1289	104	2		wild_type	ERR16083763		This study
S. enterica	Napoli (predicted)	201905896		2019	France	France	Pays-de-la-Loire	44	44860	FRG01		Human	Stool	8	5	Female	30		SAL_ZA6531AA	SAL_SB2776AA_AS	474	60	161	147	96	178	155	12	142	204636	204636	204636	204636	27733	27733	27733	27733	27729	1543	1543a	N2	1289	104	2		wild_type	ERR16083764		This study
S. enterica	Napoli (predicted)	201905918		2019	France	France	Pays-de-la-Loire	44	44650	FRG01	No Travel declared	Human	Stool	8	6	Male	70	Isolated	SAL_ZA6530AA	SAL_SB2775AA_AS	474	60	161	147	96	178	155	12	142	204637	204637	204637	204637	176341	140709	27729	27729	27729	1543	1543a	N2	1289	104	2		wild_type	ERR16083765		This study
S. enterica	Napoli (predicted)	201906025		2019	France	France	Auvergne_Rhône-Alpes	43	43300	FRK13		Human	Stool	8	5	Male	34		SAL_ZA6532AA	SAL_SB2777AA_AS	474	60	161	147	96	178	155	12	142	204638	204638	204638	204638	130700	130700	27729	27729	27729	1543	1543a	N2	1289	104	2		wild_type	ERR16083766		This study
S. enterica	Napoli (predicted)	201906048		2019	France	France	Ile-de-France	75		FR101		Human	Stool	8	7	Female	2	Isolated	SAL_ZA6524AA	SAL_SB2673AA_AS	474	60	161	147	96	178	155	12	142	204632	204632	204632	204632	204632	204632	27733	27733	27729	1543	1543a	N2	1289	104	2		wild_type	ERR16083767		This study
S. enterica	Napoli (predicted)	201906130		2019	France	France	Pays-de-la-Loire	49	49510	FRG02		Human	Stool	8	10	Female	89	Isolated	SAL_ZA6509AA	SAL_SB2630AA_AS	474	60	161	147	96	178	155	12	142	204618	204618	204618	204618	204618	140659	27733	27733	27729	1543	1543a	N2	1289	104	2		wild_type	ERR16083768		This study
S. enterica	Napoli (predicted)	201906205		2019	France	France	Occitanie	46	46600	FRJ25		Human	Stool	8	12	Female	59	Isolated	SAL_ZA6525AA	SAL_SB2674AA_AS	474	60	161	147	96	178	155	12	142	204634	204634	204634	204634	204634	204634	27733	27733	27729	1543	1543a	N2	1289	104	2		wild_type	ERR16083769		This study
S. enterica	Napoli (predicted)	201906256		2019	France	France	Pays-de-la-Loire	44	44500	FRG01		Human	Stool	8	12	Female	68		SAL_ZA6517AA	SAL_SB2652AA_AS	474	60	161	147	96	178	155	12	142	204627	204627	204627	204627	27733	27733	27733	27733	27729	1543	1543a	N2	1289	104	2		wild_type	ERR16083770		This study
S. enterica	Napoli (predicted)	201906302		2019	France	France	Nouvelle-Aquitaine	17	17250	FRI32		Human	Stool	8	9	Female	2	Isolated	SAL_ZA6515AA	SAL_SB2650AA_AS	474	60	161	147	96	178	155	12	142	204624	204624	204624	204624	204624	140604	27729	27729	27729	1543	1543a	N2	1289	104	2		wild_type	ERR16083771		This study
S. enterica	Napoli (predicted)	201906314		2019	France	France	Bourgogne_Franche-Comté	71		FRC13		Human	Stool	8	15	Female	92		SAL_ZA6514AA	SAL_SB2649AA_AS	474	60	161	147	96	178	155	12	142	204623	204623	204623	204623	204623	140588	140588	140588	140575	1543	1543a	N2	1289	104	2		wild_type	ERR16083772		This study
S. enterica	Napoli (predicted)	201906332		2019	France	France	Nouvelle-Aquitaine	79	79140	FRI33		Human	Stool	8	12	Male	4	Isolated	SAL_ZA6511AA	SAL_SB2646AA_AS	474	60	161	147	96	178	155	12	142	204622	204622	204622	204622	204618	140659	27733	27733	27729	1543	1543a	N2	1289	104	2		wild_type	ERR16083773		This study
S. enterica	Napoli (predicted)	201906380		2019	France	France	Pays-de-la-Loire	44	44210	FRG01		Human	Stool	8	19	Female	45	Isolated	SAL_ZA6523AA	SAL_SB2672AA_AS	474	60	161	147	96	178	155	12	142	204633	204633	204633	204633	27733	27733	27733	27733	27729	1543	1543a	N2	1289	104	2		wild_type	ERR16083774		This study
S. enterica	Napoli (predicted)	201906386		2019	France	France	Pays-de-la-Loire	49	49150	FRG02		Human	Stool	8	12	Male	1		SAL_ZA6522AA	SAL_SB2671AA_AS	474	60	161	147	96	178	155	12	142	204631	204631	204631	204631	204631	140611	27729	27729	27729	1543	1543a	N2	1289	104	2		wild_type	ERR16083775		This study
S. enterica	Napoli (predicted)	201906412		2019	France	France	Pays-de-la-Loire	44		FRG01		Human	Stool	8	14	Male	76		SAL_ZA6521AA	SAL_SB2670AA_AS	474	60	161	147	96	178	155	12	142	204630	204630	204630	204630	204630	140597	27729	27729	27729	1543	1543a	N2	1289	104	2		wild_type	ERR16083776		This study
S. enterica	Napoli (predicted)	201906413		2019	France	France	Pays-de-la-Loire	49	49130	FRG02		Human	Stool	8	14	Male	68		SAL_ZA6519AA	SAL_SB2654AA_AS	474	60	161	147	96	178	155	12	142	204626	204626	204626	204626	204626	204626	27729	27729	27729	1543	1543a	N2	1289	104	2		wild_type	ERR16083777		This study
S. enterica	Napoli (predicted)	201906423		2019	France	France	Centre_Val-de-Loire	28		FRB02		Human	Stool	8	16	Male	57	Isolated	SAL_ZA6518AA	SAL_SB2653AA_AS	474	60	161	147	96	178	155	12	142	204628	204628	204628	204628	204628	204628	27729	27729	27729	1543	1543a	N2	1289	104	2		wild_type	ERR16083778		This study
S. enterica	Napoli (predicted)	201906436		2019	France	France	Centre_Val-de-Loire	37	37500	FRB04		Human	Stool	8	10	Male	32	Isolated	SAL_ZA6520AA	SAL_SB2655AA_AS	474	60	161	147	96	178	155	12	142	204629	204629	204629	204629	204629	27729	27729	27729	27729	1543	1543a	N2	1289	104	2		wild_type	ERR16083779		This study
S. enterica	Napoli (predicted)	201906456		2019	France	France	Grand-Est	68	68720	FRF12		Human	Stool	8	14	Male	4	Isolated	SAL_BB2315AA	SAL_VB8286AA_AS	474	60	161	147	96	178	155	12	142	216227	216227	204648	140601	140601	107128	97218	24950	1543	1543	1543b	N2	1289	104	2		wild_type	ERR16083780		This study
S. enterica	Napoli (predicted)	201906459		2019	France	France	Nouvelle-Aquitaine	33	33800	FRI12		Human	Stool	8	9	Male	< 1	Isolated	SAL_ZA6507AA	SAL_SB2628AA_AS	474	60	161	147	96	178	155	12	142	204619	204619	204619	204619	204619	140653	27733	27733	27729	1543	1543a	N2	1289	104	2		wild_type	ERR16083781		This study
S. enterica	Napoli (predicted)	201906482		2019	France	France	Pays-de-la-Loire	49	49410	FRG02		Human	Stool	8	17	Male	67	Isolated	SAL_ZA6505AA	SAL_SB2626AA_AS	474	60	161	147	96	178	155	12	142	204616	204616	204616	204616	124002	124002	27729	27729	27729	1543	1543a	N2	1289	104	2		wild_type	ERR16083782		This study
S. enterica	Napoli (predicted)	201906487		2019	France	France	Grand-Est	68		FRF12	No Travel declared	Human	Stool	8	16	Male	63	Isolated	SAL_ZA6506AA	SAL_SB2627AA_AS	474	60	161	147	96	178	155	12	142	204614	204614	204614	204614	140601	107128	97218	24950	1543	1543	1543b	N2	1289	104	2		wild_type	ERR16083783		This study
S. enterica	Napoli (predicted)	201906531		2019	France	France	Nouvelle-Aquitaine	17	17400	FRI32		Human	Stool	8	17	Male	85		SAL_ZA6510AA	SAL_SB2631AA_AS	474	60	161	147	96	178	155	12	142	204617	204617	204617	204617	204617	204617	27729	27729	27729	1543	1543a	N2	1289	104	2		wild_type	ERR16083784		This study
S. enterica	Napoli (predicted)	201906536		2019	France	France	Pays-de-la-Loire	44	44120	FRG01	No Travel declared	Human	Stool	8	13	Female	19	Isolated	SAL_ZA6508AA	SAL_SB2629AA_AS	474	60	161	147	96	178	155	12	142	204615	204615	204615	204615	140608	27733	27733	27733	27729	1543	1543a	N2	1289	104	2		wild_type	ERR16083785		This study
S. enterica	Napoli (predicted)	201909637		2019	France		Provence-Alpes-Cote-dAzur	06	06220	FRL03		Human	Stool	10		Female	84		SAL_MB8019AA	SAL_VC2001AA_AS	2019	60	161	147	348	178	155	12	142	312248	312248	147769	107104	107104	107104	20426	20426	7673	7673	7673	N1	1289	104	2		wild_type	ERR16083829		This study
S. enterica	Napoli (predicted)	201910367	201910367bis	2019	France	France	Nouvelle-Aquitaine	16	16600	FRI31		Human	Stool	11	09	Male	5		SAL_BB9104AA	SAL_YB6276AA_AS	474	60	161	147	96	178	155	12	142	221930	217675	217675	217675	204656	140653	27733	27733	27729	1543	1543a	N2	1289	104	2		wild_type	ERR16083840		This study
S. enterica	Napoli (predicted)	201910368	201910368bis	2019	France	France	Nouvelle-Aquitaine	79	79290	FRI33		Human	Stool	11	05	Male	< 1	Isolated	SAL_BB9103AA	SAL_YB6275AA_AS	474	60	161	147	96	178	155	12	142	221931	216269	216269	216265	216265	216265	27729	27729	27729	1543	1543a	N2	1289	104	2		wild_type	ERR16083841		This study
S. enterica	Napoli (predicted)	201910477		2019	France	Italy	Normandie	76	76600	FRD22		Human	Stool	11	12	Male	64	Isolated	SAL_BB3501AA	SAL_WB0774AA_AS	2008	60	161	147	348	178	155	436	142	216862	216862	216862	216862	216862	107106	7673	7673	7673	7673	7673	N1	1289	104	2		wild_type	ERR16083842		This study
S. enterica	Napoli (predicted)	201911354		2019	France	France	Pays-de-la-Loire	44		FRG01		Human	Stool	12	12	Female	66		SAL_BB7769AA	SAL_XB3512AA_AS	474	60	161	147	96	178	155	12	142	220722	220722	220722	220722	140701	124002	27729	27729	27729	1543	1543a	N2	1289	104	2		wild_type	ERR16083843		This study
S. enterica	Napoli (predicted)	2020LSAL00108		2020	France	France	Normandie	50		FRD12		Food	Dairy_product_environment	12	23				SAL_NB0629AA	SAL_VC4495AA_AS	474	60	161	147	96	178	155	12	142	314402	276437	276437	276437	204834	140653	27733	27733	27729	1543	1543a	N2	1289	104	2		wild_type	ERR9714981		This study
S. enterica	Napoli (predicted)	A_20-0121	S20LNR0121	2020	France	France	Pays-de-la-Loire	72		FRG04		Environment	Poultry	6	16				SAL_HB8087AA	SAL_PC3127AA_AS	474	60	161	147	96	178	155	12	142	264037	264037	264037	264037	264037	140605	27729	27729	27729	1543	1543a	N2	1289	104	2		wild_type	ERR16061035		This study
S. enterica	Napoli (predicted)	A_20-0248	S20LNR0248	2020	France	France	Pays-de-la-Loire	85		FRG05		Environment	Poultry	7	6				SAL_HB8086AA	SAL_PC3126AA_AS	474	60	161	147	96	178	155	12	142	264022	264022	264022	264022	204618	140659	27733	27733	27729	1543	1543a	N2	1289	104	2		wild_type	ERR16061036		This study
S. enterica	Napoli (predicted)	A_20-0354	S20LNR0354	2020	France	France	Pays-de-la-Loire	53		FRG03		Environment	Poultry	3	26				SAL_HB8083AA	SAL_PC3123AA_AS	474	60	161	147	96	178	155	12	142	264013	264013	264013	264013	140649	140611	27729	27729	27729	1543	1543a	N2	1289	104	2		wild_type	ERR16061037		This study
S. enterica	Napoli (predicted)	A_20-0402	S20LNR0402	2020	France	France	Pays-de-la-Loire	44		FRG01		Environment	Poultry	5	15				SAL_HB8081AA	SAL_PC3121AA_AS	474	60	161	147	96	178	155	12	142	264035	264035	264035	264035	140724	140709	27729	27729	27729	1543	1543a	N2	1289	104	2		wild_type	ERR16061038		This study
S. enterica	Napoli (predicted)	A_20-0489	S20LNR0489	2020	France	France	Pays-de-la-Loire	49		FRG02		Environment	Poultry	8	5				SAL_HB8080AA	SAL_PC3120AA_AS	474	60	161	147	96	178	155	12	142	264018	264018	264018	264018	264018	264018	27729	27729	27729	1543	1543a	N2	1289	104	2		wild_type	ERR16061039		This study
S. enterica	Napoli (predicted)	A_20-0490	S20LNR0490	2020	France	France	Nouvelle-Aquitaine	79		FRI33		Environment	Poultry	8	4				SAL_HB8078AA	SAL_PC3118AA_AS	474	60	161	147	96	178	155	12	142	264015	264015	204831	140603	124002	124002	27729	27729	27729	1543	1543a	N2	1289	104	2		wild_type	ERR16061040		This study
S. enterica	Napoli (predicted)	A_20-0520	S20LNR0520	2020	France	France	Pays-de-la-Loire	49		FRG02		Environment	Poultry	8	19				SAL_HB8075AA	SAL_PC3115AA_AS	474	60	161	147	96	178	155	12	142	264041	264041	264041	264041	124002	124002	27729	27729	27729	1543	1543a	N2	1289	104	2		wild_type	ERR16061041		This study
S. enterica	Napoli (predicted)	A_20-1190	S20LNR1190	2020	France	France	Occitanie	81		FRJ27		Environment	Poultry	6	8				SAL_HB8071AA	SAL_PC3111AA_AS	5168	60	161	147	96	1085	155	12	142	264019	264019	264019	264019	140590	140575	140575	140575	140575	1543	1543a	N2	1289	104	2		wild_type	ERR16061042		This study
S. enterica	Napoli (predicted)	A_20-1426	S20LNR1426	2020	France	France	Bretagne	35		FRH03		Environment	Poultry	6	3				SAL_HB8074AA	SAL_PC3114AA_AS	474	60	161	147	96	178	155	12	142	264038	264038	264038	204722	140749	130700	27729	27729	27729	1543	1543a	N2	1289	104	2		wild_type	ERR16061043		This study
S. enterica	Napoli (predicted)	A_20-1525	S20LNR1525	2020	France	France	Bretagne	56		FRH04		Environment	Poultry	8	20				SAL_HB8072AA	SAL_PC3112AA_AS	474	60	161	147	96	178	155	12	142	264011	264011	264011	264011	264011	27733	27733	27733	27729	1543	1543a	N2	1289	104	2		wild_type	ERR16061044		This study
S. enterica	Napoli (predicted)	A_20-1527	S20LNR1527	2020	France	France	Bretagne	56		FRH04		Environment	Poultry	8	26				SAL_HB9667AA	SAL_PC5699AA_AS	474	60	161	147	96	178	155	12	142	266988	266988	266988	266988	140626	140626	140618	27729	27729	1543	1543a	N2	1289	104	2		wild_type	ERR16061045		This study
S. enterica	Napoli (predicted)	N20-0603		2020	Switzerland	Switzerland	unknown					Environment	Poultry_Chicken_stable						SAL_GB9263AA	SAL_OC1940AA_AS	474	60	161	147	96	178	155	12	142	258835	247540	204909	204899	140601	107128	97218	24950	1543	1543	1543b	N2	1289	104	2		wild_type	ERR16060799		This study
S. enterica	Napoli (predicted)	N20-0687		2020	Switzerland	Switzerland	Tessin	TE	6532	CH07		Human	Stool						SAL_GB9265AA	SAL_OC1989AA_AS	474	60	161	147	96	178	155	12	142	258869	258853	258853	204894	204879	24950	24950	24950	1543	1543	1543b	N2	1289	104	2		wild_type	ERR16060800		This study
S. enterica	Napoli (predicted)	N20-0724		2020	Switzerland	Switzerland	Tessin	TE	6678	CH07		Human	Stool						SAL_GB9262AA	SAL_OC1939AA_AS	474	60	161	147	96	178	155	12	142	258832	258832	258832	258832	258832	258832	97218	24950	1543	1543	1543b	N2	1289	104	2		wild_type	ERR16060801		This study
S. enterica	Napoli (predicted)	N20-0820		2020	Switzerland	Switzerland	Tessin	TE	6982	CH07		Human	Stool						SAL_GB9264AA	SAL_OC1988AA_AS	474	60	161	147	96	178	155	12	142	258870	258851	258851	258851	258851	24950	24950	24950	1543	1543	1543b	N2	1289	104	2		wild_type	ERR16060802		This study
S. enterica	Napoli (predicted)	N20-0862		2020	Switzerland	Switzerland	Tessin	TE	6512	CH07		Human	Stool						SAL_GB9271AA	SAL_OC1991AA_AS	474	60	161	147	96	178	155	12	142	258856	258856	258826	258826	204879	24950	24950	24950	1543	1543	1543b	N2	1289	104	2		wild_type	ERR16060803		This study
S. enterica	Napoli (predicted)	N20-0913		2020	Switzerland	Switzerland	Zürich	ZH	8004	CH04		Human	Thigh_tissue						SAL_GB9266AA	SAL_OC1943AA_AS	474	60	161	147	96	178	155	12	142	258834	247537	247537	204894	204879	24950	24950	24950	1543	1543	1543b	N2	1289	104	2		wild_type	ERR16060804		This study
S. enterica	Napoli (predicted)	N20-0914		2020	Switzerland	Switzerland	Zentralschweiz	UR	6460	CH06		Human	Stool						SAL_GB9270AA	SAL_OC1990AA_AS	474	60	161	147	96	178	155	12	142	258866	258859	258859	204906	204906	204906	107035	24950	1543	1543	1543b	N2	1289	104	2		wild_type	ERR16060805		This study
S. enterica	Napoli (predicted)	N20-0919		2020	Switzerland	Switzerland	Tessin	TE	6982	CH07		Human	Stool						SAL_GB9268AA	SAL_OC1945AA_AS	474	60	161	147	96	178	155	12	142	258838	258838	258838	204915	204915	24950	24950	24950	1543	1543	1543b	N2	1289	104	2		wild_type	ERR16060806		This study
S. enterica	Napoli (predicted)	N20-0922		2020	Switzerland	Switzerland	Zentralschweiz	UR	6460	CH06		Human	Stool						SAL_GB9267AA	SAL_OC1944AA_AS	474	60	161	147	96	178	155	12	142	258837	258837	258837	204906	204906	204906	107035	24950	1543	1543	1543b	N2	1289	104	2		wild_type	ERR16060807		This study
S. enterica	Napoli (predicted)	N20-0948		2020	Switzerland	Switzerland	Nordwestschweiz	BL	4133	CH03		Human	Stool						SAL_GB9269AA	SAL_OC1946AA_AS	474	60	161	147	96	178	155	12	142	258836	258836	204909	204899	140601	107128	97218	24950	1543	1543	1543b	N2	1289	104	2		wild_type	ERR16060808		This study
S. enterica	Napoli (predicted)	N20-1102	SalmUZH-N20-1102	2020	Switzerland	Switzerland	unknown	Germany	45665			Human	Stool						SAL_GB9272AA	SAL_OC1949AA_AS	474	60	161	147	96	178	155	12	142	258833	258833	247537	204894	204879	24950	24950	24950	1543	1543	1543b	N2	1289	104	2		wild_type	ERR16060809		This study
S. enterica	Napoli (predicted)	N20-1119		2020	Switzerland	Switzerland	Nordwestschweiz	BS	4057	CH03		Human	Stool						SAL_GB9274AA	SAL_OC1993AA_AS	474	60	161	147	96	178	155	12	142	258843	258843	258843	258843	140601	107128	97218	24950	1543	1543	1543b	N2	1289	104	2		wild_type	ERR16060810		This study
S. enterica	Napoli (predicted)	N20-1138		2020	Switzerland	Switzerland	Nordwestschweiz	BL	4133	CH03		Human	Stool						SAL_GB9275AA	SAL_OC1994AA_AS	474	60	161	147	96	178	155	12	142	258842	258842	204909	204899	140601	107128	97218	24950	1543	1543	1543b	N2	1289	104	2		wild_type	ERR16060811		This study
S. enterica	Napoli (predicted)	N20-1156		2020	Switzerland	Switzerland	Tessin	ZH	8704	CH07		Human	Blood						SAL_GB9273AA	SAL_OC1992AA_AS	474	60	161	147	96	178	155	12	142	258846	258846	247523	247523	204879	24950	24950	24950	1543	1543	1543b	N2	1289	104	2		wild_type	ERR16060812		This study
S. enterica	Napoli (predicted)	N20-1239		2020	Switzerland	Switzerland	Tessin	TE	6949	CH07		Human	Stool						SAL_GB9276AA	SAL_OC1995AA_AS	474	60	161	147	96	178	155	12	142	258845	258845	258826	258826	204879	24950	24950	24950	1543	1543	1543b	N2	1289	104	2		wild_type	ERR16060813		This study
S. enterica	Napoli (predicted)	N20-1248		2020	Switzerland	Switzerland	Nordwestschweiz	BS	4054	CH03		Human	Stool						SAL_GB9278AA	SAL_OC1997AA_AS	474	60	161	147	96	178	155	12	142	258863	258844	204909	204899	140601	107128	97218	24950	1543	1543	1543b	N2	1289	104	2		wild_type	ERR16060814		This study
S. enterica	Napoli (predicted)	N20-1326		2020	Switzerland	Italy	Tessin	TE	6852	CH07		Human	Stool						SAL_GB9277AA	SAL_OC1996AA_AS	2095	60	161	147	151	178	155	12	142	258848	258848	258848	258848	258848	258848	1748	1748	1450	1450	1450	N1	1289	104	2		wild_type	ERR16060815		This study
S. enterica	Napoli (predicted)	N20-1344		2020	Switzerland	Switzerland	unknown					Food	food						SAL_GB9281AA	SAL_OC1958AA_AS	474	60	161	147	96	178	155	12	142	258839	258839	258839	258839	204893	137319	97218	24950	1543	1543	1543b	N2	1289	104	2		wild_type	ERR16060816		This study
S. enterica	Napoli (predicted)	N20-1345		2020	Switzerland	Switzerland	Nordwestschweiz	BS	4125	CH03		Human	Stool						SAL_GB9279AA	SAL_OC1998AA_AS	474	60	161	147	96	178	155	12	142	258847	247529	204925	140601	140601	107128	97218	24950	1543	1543	1543b	N2	1289	104	2		wild_type	ERR16060817		This study
S. enterica	Napoli (predicted)	N20-1348		2020	Switzerland	Switzerland	Tessin	TE	6780	CH07		Human	Stool						SAL_GB9280AA	SAL_OC1957AA_AS	474	60	161	147	96	178	155	12	142	258840	258840	258840	204893	204893	137319	97218	24950	1543	1543	1543b	N2	1289	104	2		wild_type	ERR16060818		This study
S. enterica	Napoli (predicted)	N20-1354		2020	Switzerland	Switzerland	Zentralschweiz	UR	6472	CH06		Human	Stool						SAL_GB9282AA	SAL_OC1959AA_AS	474	60	161	147	96	178	155	12	142	258841	258841	258837	204906	204906	204906	107035	24950	1543	1543	1543b	N2	1289	104	2		wild_type	ERR16060819		This study
S. enterica	Napoli (predicted)	N20-1375		2020	Switzerland	Switzerland	Nordwestschweiz	AG	8956	CH03		Human	Blood						SAL_GB9285AA	SAL_OC1983AA_AS	474	60	161	147	96	178	155	12	142	258855	258855	204869	204869	204869	137329	97218	24950	1543	1543	1543b	N2	1289	104	2		wild_type	ERR16060820		This study
S. enterica	Napoli (predicted)	N20-1432		2020	Switzerland	Switzerland	Tessin	TE	6807	CH07		Human	Blood						SAL_GB9287AA	SAL_OC1985AA_AS	474	60	161	147	96	178	155	12	142	258852	258852	258852	258852	204879	24950	24950	24950	1543	1543	1543b	N2	1289	104	2		wild_type	ERR16060821		This study
S. enterica	Napoli (predicted)	N20-1439		2020	Switzerland	Switzerland	Nordwestschweiz	BS	4058	CH03		Human	Stool						SAL_GB9283AA	SAL_OC1981AA_AS	474	60	161	147	96	178	155	12	142	258858	258858	204925	140601	140601	107128	97218	24950	1543	1543	1543b	N2	1289	104	2		wild_type	ERR16060822		This study
S. enterica	Napoli (predicted)	N20-1484		2020	Switzerland	Switzerland	Nordwestschweiz	AG	5400	CH03		Human	Stool						SAL_GB9284AA	SAL_OC1982AA_AS	474	60	161	147	96	178	155	12	142	258857	258822	258822	204869	204869	137329	97218	24950	1543	1543	1543b	N2	1289	104	2		wild_type	ERR16060823		This study
S. enterica	Napoli (predicted)	N20-1494		2020	Switzerland	Switzerland	Ostschweiz	GR	7513	CH05		Human	Stool						SAL_GB9286AA	SAL_OC1984AA_AS	474	60	161	147	96	178	155	12	142	258854	258854	258854	204915	204915	24950	24950	24950	1543	1543	1543b	N2	1289	104	2		wild_type	ERR16060824		This study
S. enterica	Napoli (predicted)	N20-1569		2020	Switzerland	Switzerland	Nordwestschweiz	BL	4142	CH03		Human	Stool						SAL_GB9244AA	SAL_OC1921AA_AS	474	60	161	147	96	178	155	12	142	258821	258821	204925	140601	140601	107128	97218	24950	1543	1543	1543b	N2	1289	104	2		wild_type	ERR16060825		This study
S. enterica	Napoli (predicted)	N20-1582		2020	Switzerland	Switzerland	Nordwestschweiz	AG	5400	CH03		Human	Stool						SAL_GB9246AA	SAL_OC1923AA_AS	474	60	161	147	96	178	155	12	142	258822	258822	258822	204869	204869	137329	97218	24950	1543	1543	1543b	N2	1289	104	2		wild_type	ERR16060826		This study
S. enterica	Napoli (predicted)	N20-1623		2020	Switzerland	Switzerland	Tessin	TE	6534	CH07		Human	Stool						SAL_GB9245AA	SAL_OC1922AA_AS	474	60	161	147	96	178	155	12	142	258820	258820	258820	258820	258820	204905	204905	24950	1543	1543	1543b	N2	1289	104	2		wild_type	ERR16060827		This study
S. enterica	Napoli (predicted)	N20-1624		2020	Switzerland	Switzerland	Tessin	TE	6814	CH07		Human	Stool						SAL_GB9247AA	SAL_OC1924AA_AS	474	60	161	147	96	178	155	12	142	258826	258826	258826	258826	204879	24950	24950	24950	1543	1543	1543b	N2	1289	104	2		wild_type	ERR16060828		This study
S. enterica	Napoli (predicted)	N20-1661		2020	Switzerland	Switzerland	Zürich	ZH	8634	CH04		Human	Stool						SAL_GB9248AA	SAL_OC1925AA_AS	474	60	161	147	96	178	155	12	142	258816	258816	258816	258816	258816	258816	258816	24950	1543	1543	1543b	N2	1289	104	2		wild_type	ERR16060829		This study
S. enterica	Napoli (predicted)	N20-1732		2020	Switzerland	Switzerland	unknown					Environment							SAL_GB9249AA	SAL_OC1926AA_AS	474	60	161	147	96	178	155	12	142	258817	258817	258817	204927	204927	137329	97218	24950	1543	1543	1543b	N2	1289	104	2		wild_type	ERR16060830		This study
S. enterica	Napoli (predicted)	N20-1762		2020	Switzerland		Tessin	TE	6830	CH07		Human	Stool						SAL_GB9250AA	SAL_OC1927AA_AS	4354	60	161	685	151	178	155	12	142	258828	258828	258828	258828	258828	258828	258828	94001	94001	94001	94001	N1	1289	104	2		wild_type	ERR16060831		This study
S. enterica	Napoli (predicted)	N20-1818		2020	Switzerland	Switzerland	Ostschweiz	GR	7402	CH05		Human	Stool						SAL_GB9251AA	SAL_OC1928AA_AS	474	60	161	147	96	178	155	12	142	258818	258818	258818	258818	258818	24950	24950	24950	1543	1543	1543b	N2	1289	104	2		wild_type	ERR16060832		This study
S. enterica	Napoli (predicted)	N20-1819		2020	Switzerland	Switzerland	Espace Mittelland	SO	4713	CH02		Human	Stool						SAL_GB9253AA	SAL_OC1930AA_AS	474	60	161	147	96	178	155	12	142	258819	258818	258818	258818	258818	24950	24950	24950	1543	1543	1543b	N2	1289	104	2		wild_type	ERR16060833		This study
S. enterica	Napoli (predicted)	N20-1820		2020	Switzerland	Switzerland	Zürich	ZH	8803	CH04		Human	Stool						SAL_GB9254AA	SAL_OC1986AA_AS	474	60	161	147	96	178	155	12	142	258849	258849	258849	204893	204893	137319	97218	24950	1543	1543	1543b	N2	1289	104	2		wild_type	ERR16060834		This study
S. enterica	Napoli (predicted)	N20-1823		2020	Switzerland	Switzerland	Zentralschweiz	SZ	6443	CH06		Human	Blood						SAL_GB9252AA	SAL_OC1929AA_AS	474	60	161	147	96	178	155	12	142	258827	258827	258827	204906	204906	204906	107035	24950	1543	1543	1543b	N2	1289	104	2		wild_type	ERR16060835		This study
S. enterica	Napoli (predicted)	N20-2006		2020	Switzerland	Switzerland	Tessin	TE	6760	CH07		Human	Stool						SAL_GB9255AA	SAL_OC1987AA_AS	474	60	161	147	96	178	155	12	142	258850	258850	258850	204893	204893	137319	97218	24950	1543	1543	1543b	N2	1289	104	2		wild_type	ERR16060836		This study
S. enterica	Napoli (predicted)	N20-2073		2020	Switzerland	Switzerland	Zürich	ZH	8102	CH04		Human	Stool						SAL_GB9256AA	SAL_OC1933AA_AS	474	60	161	147	96	178	155	12	142	258825	258825	137328	137328	137328	107128	97218	24950	1543	1543	1543b	N2	1289	104	2		wild_type	ERR16060837		This study
S. enterica	Napoli (predicted)	N20-2090		2020	Switzerland	Switzerland	Nordwestschweiz	BL	4144	CH03		Human	Stool						SAL_GB9257AA	SAL_OC1934AA_AS	474	60	161	147	96	178	155	12	142	258829	258829	258829	140601	140601	107128	97218	24950	1543	1543	1543b	N2	1289	104	2		wild_type	ERR16060838		This study
S. enterica	Napoli (predicted)	N20-2165		2020	Switzerland	Switzerland	Zürich	ZH	8408	CH04		Human	Stool						SAL_GB9258AA	SAL_OC1935AA_AS	7174	60	161	147	96	178	1139	12	142	258823	258823	204950	204950	204950	107128	97218	24950	1543	1543	1543b	N2	1289	104	2		wild_type	ERR16060839		This study
S. enterica	Napoli (predicted)	N20-2175		2020	Switzerland	Switzerland	Zentralschweiz	OW	6060	CH06		Human	Stool						SAL_GB9259AA	SAL_OC1936AA_AS	474	60	161	147	96	178	155	12	142	258824	258824	258824	258824	258824	137319	97218	24950	1543	1543	1543b	N2	1289	104	2		wild_type	ERR16060840		This study
S. enterica	Napoli (predicted)	N20-2546		2020	Switzerland	Italy	Ostschweiz	SG	3340	CH05		Human	Stool						SAL_GB9260AA	SAL_OC1937AA_AS	1637	60	161	163	96	178	155	12	142	258830	258830	258830	258830	258830	258830	258830	20879	20879	20879	20879	N2	1289	104	2		wild_type	ERR16060841		This study
S. enterica	Napoli (predicted)	N20-2564		2020	Switzerland	Switzerland	Ostschweiz	TG	8599	CH05		Human	Stool						SAL_GB9261AA	SAL_OC1938AA_AS	474	60	161	147	96	178	155	12	142	258831	247536	204909	204899	140601	107128	97218	24950	1543	1543	1543b	N2	1289	104	2		wild_type	ERR16060842		This study
S. enterica	Napoli (predicted)	202000609		2020	France	France	Pays-de-la-Loire	44	44170	FRG01		Human	Stool	01	20	Female	70		SAL_CB0059AA	SAL_AC4450AA_AS	474	60	161	147	96	178	155	12	142	222879	222879	222879	222879	124002	124002	27729	27729	27729	1543	1543a	N2	1289	104	2		wild_type	ERR16083844		This study
S. enterica	Napoli (predicted)	202001064		2020	France	France	Pays-de-la-Loire	49	49170	FRG02	No Travel declared	Human	Stool	02	09	Female	56	Isolated	SAL_CB5450AA	SAL_CC5913AA_AS	474	60	161	147	96	178	155	12	142	227343	227343	227343	227343	124002	124002	27729	27729	27729	1543	1543a	N2	1289	104	2		wild_type	ERR16083845		This study
S. enterica	Napoli (predicted)	202001912		2020	France	France	Nouvelle-Aquitaine	33		FRI12	No Travel declared	Human	Stool	03	23	Male	70	Isolated	SAL_DB3095AA	SAL_HC7515AA_AS	5168	60	161	147	96	1085	155	12	142	233413	233413	233413	233413	140658	140575	140575	140575	140575	1543	1543a	N2	1289	104	2		wild_type	ERR16083846		This study
S. enterica	Napoli (predicted)	202002196		2020	France	France	Auvergne_Rhône-Alpes	15	15200	FRK12		Human	Stool	04	17	Male	< 1		SAL_DB1563AA	SAL_HC5335AA_AS	474	60	161	147	96	178	155	12	142	232436	232436	232436	232436	232436	232436	140588	140588	140575	1543	1543a	N2	1289	104	2		wild_type	ERR16083847		This study
S. enterica	Napoli (predicted)	202002253		2020	France	France	Pays-de-la-Loire	49		FRG02		Human	Stool	04	22	Female	5		SAL_DB2131AA	SAL_HC6154AA_AS	474	60	161	147	96	178	155	12	142	232710	232710	232710	232710	124002	124002	27729	27729	27729	1543	1543a	N2	1289	104	2		wild_type	ERR16083848		This study
S. enterica	Napoli (predicted)	202002254		2020	France	France	Nouvelle-Aquitaine	16		FRI31		Human	Stool	04	23	Male	1		SAL_DB2132AA	SAL_HC6155AA_AS	474	60	161	147	96	178	155	12	142	232706	232706	232706	232706	232706	140621	27733	27733	27729	1543	1543a	N2	1289	104	2		wild_type	ERR16083849		This study
S. enterica	Napoli (predicted)	202002263		2020	France	France	Occitanie	82	82400	FRJ28		Human	Stool	04	24	Female	86	Isolated	SAL_DB3098AA	SAL_HC7518AA_AS	5168	60	161	147	96	1085	155	12	142	233415	233415	233415	233415	140590	140575	140575	140575	140575	1543	1543a	N2	1289	104	2		wild_type	ERR16083850		This study
S. enterica	Napoli (predicted)	202002304		2020	France	France	Nouvelle-Aquitaine	16	16000	FRI31		Human	Stool	04	30	Male	6	Isolated	SAL_DB2595AA	SAL_HC7201AA_AS	474	60	161	147	96	178	155	12	142	233249	233249	233249	233249	233249	140653	27733	27733	27729	1543	1543a	N2	1289	104	2		wild_type	ERR16083851		This study
S. enterica	Napoli (predicted)	202002337		2020	France	France	Nouvelle-Aquitaine	19	19100	FRI21		Human	Stool	04	29	Male	90	Isolated	SAL_DB2596AA	SAL_HC7202AA_AS	474	60	161	147	96	178	155	12	142	233250	233250	233250	214078	176319	176319	27733	27733	27729	1543	1543a	N2	1289	104	2		wild_type	ERR16083852		This study
S. enterica	Napoli (predicted)	202002366		2020	France	France	Pays-de-la-Loire	72	72110	FRG04		Human	Stool	05	03	Male	95	Isolated	SAL_DB2597AA	SAL_HC7203AA_AS	474	60	161	147	96	178	155	12	142	233243	233243	233243	233243	233243	124002	27729	27729	27729	1543	1543a	N2	1289	104	2		wild_type	ERR16083853		This study
S. enterica	Napoli (predicted)	202002537		2020	France	France	Pays-de-la-Loire	44	44340	FRG01		Human	Stool	05	20	Male	4	Isolated	SAL_DB3623AA	SAL_HC8420AA_AS	474	60	161	147	96	178	155	12	142	233884	233884	233884	233884	233884	140597	27729	27729	27729	1543	1543a	N2	1289	104	2		wild_type	ERR16083854		This study
S. enterica	Napoli (predicted)	202002566		2020	France	France	Centre_Val-de-Loire	37	36120	FRB04	No Travel declared	Human	Stool	05	15	Male	56		SAL_DB3669AA	SAL_HC8466AA_AS	474	60	161	147	96	178	155	12	142	233867	233867	233867	233867	233867	140652	27729	27729	27729	1543	1543a	N2	1289	104	2		wild_type	ERR16083855		This study
S. enterica	Napoli (predicted)	202002605		2020	France	France	Grand-Est	68	68390	FRF12		Human	Stool	05	19	Male	54		SAL_DB4800AA	SAL_IC0465AA_AS	474	60	161	147	96	178	155	12	142	234837	234837	234837	234837	140601	107128	97218	24950	1543	1543	1543b	N2	1289	104	2		wild_type	ERR16083856		This study
S. enterica	Napoli (predicted)	202002620		2020	France	France	Bretagne	56	56530	FRH04		Human	Stool	05	22	Male	3	Isolated	SAL_DB4803AA	SAL_IC0468AA_AS	474	60	161	147	96	178	155	12	142	234832	234832	234832	234832	234832	27733	27733	27733	27729	1543	1543a	N2	1289	104	2		wild_type	ERR16083857		This study
S. enterica	Napoli (predicted)	202002627		2020	France	France	Provence-Alpes-Cote-dAzur	06	06430	FRL03	No Travel declared	Human	Blood	05	20	Female	21	Isolated	SAL_DB4798AA	SAL_IC0463AA_AS	474	60	161	147	96	178	155	12	142	234842	234842	234842	234842	234842	176308	26263	24950	1543	1543	1543b	N2	1289	104	2		wild_type	ERR16083858		This study
S. enterica	Napoli (predicted)	202002676		2020	France	France	Nouvelle-Aquitaine	24	24000	FRI11		Human	Stool	05	25	Male	6	Isolated	SAL_DB4155AA	SAL_HC9560AA_AS	474	60	161	147	96	178	155	12	142	234365	234365	234365	234365	140735	140702	27733	27733	27729	1543	1543a	N2	1289	104	2		wild_type	ERR16083859		This study
S. enterica	Napoli (predicted)	202002689		2020	France	France	Nouvelle-Aquitaine	17	17139	FRI32	No Travel declared	Human	Stool	05	24	Male	42	Isolated	SAL_DB4156AA	SAL_HC9561AA_AS	474	60	161	147	96	178	155	12	142	234367	234367	234367	234367	234367	140604	27729	27729	27729	1543	1543a	N2	1289	104	2		wild_type	ERR16083860		This study
S. enterica	Napoli (predicted)	202002721		2020	France	France	Ile-de-France	75	75011	FR101		Human	Stool	05	26	Male	71	Isolated	SAL_DB4531AA	SAL_IC0158AA_AS	474	60	161	147	96	178	155	12	142	234466	234466	234466	27733	27733	27733	27733	27733	27729	1543	1543a	N2	1289	104	2		wild_type	ERR16083861		This study
S. enterica	Napoli (predicted)	202002755		2020	France	France	Normandie	61	61400	FRD13		Human	Stool	05	26	Female	31	Isolated	SAL_DB4530AA	SAL_IC0157AA_AS	474	60	161	147	96	178	155	12	142	234469	234469	234469	234469	140649	140611	27729	27729	27729	1543	1543a	N2	1289	104	2		wild_type	ERR16083862		This study
S. enterica	Napoli (predicted)	202002785		2020	France	France	Pays-de-la-Loire	44		FRG01		Human	Stool	05	30	Male	76		SAL_DB4526AA	SAL_IC0153AA_AS	474	60	161	147	96	178	155	12	142	234467	234467	234467	234467	234467	140597	27729	27729	27729	1543	1543a	N2	1289	104	2		wild_type	ERR16083863		This study
S. enterica	Napoli (predicted)	202002786		2020	France	France	Pays-de-la-Loire	49	49123	FRG02	No Travel declared	Human	Stool	05	26	Female	17	Isolated	SAL_DB4528AA	SAL_IC0155AA_AS	474	60	161	147	96	178	155	12	142	234464	234464	234464	234464	140671	140650	27729	27729	27729	1543	1543a	N2	1289	104	2		wild_type	ERR16083864		This study
S. enterica	Napoli (predicted)	202002811		2020	France	France	Centre_Val-de-Loire	37	37250	FRB04		Human	Stool	05	31	Male	81	Isolated	SAL_DB4527AA	SAL_IC0154AA_AS	474	60	161	147	96	178	155	12	142	234463	234463	234463	234463	234463	140652	27729	27729	27729	1543	1543a	N2	1289	104	2		wild_type	ERR16083865		This study
S. enterica	Napoli (predicted)	202002815		2020	France	France	Nouvelle-Aquitaine	19	19000	FRI21		Human	Stool	05	31	Male	65	Isolated	SAL_DB4529AA	SAL_IC0156AA_AS	474	60	161	147	96	178	155	12	142	234468	234468	234468	234468	234468	234468	27733	27733	27729	1543	1543a	N2	1289	104	2		wild_type	ERR16083866		This study
S. enterica	Napoli (predicted)	202002867		2020	France	France	Nouvelle-Aquitaine	79	79000	FRI33		Human	Stool	06	02	Male	7	Isolated	SAL_DB4807AA	SAL_IC0479AA_AS	474	60	161	147	96	178	155	12	142	234851	234851	234851	234851	140655	140655	27729	27729	27729	1543	1543a	N2	1289	104	2		wild_type	ERR16083867		This study
S. enterica	Napoli (predicted)	202002868		2020	France	France	Pays-de-la-Loire	49		FRG02		Human	Stool	06	04	Female	81	Isolated	SAL_DB4809AA	SAL_IC0481AA_AS	8009	60	161	147	96	1557	155	12	142	234853	234853	234853	234853	234853	234853	140616	27729	27729	1543	1543a	N2	1289	104	2		wild_type	ERR16083868		This study
S. enterica	Napoli (predicted)	202002874		2020	France	France	Bourgogne_Franche-Comté	71	71570	FRC13		Human	Stool	06	04	Female	10	Isolated	SAL_DB4808AA	SAL_IC0480AA_AS	474	60	161	147	96	178	155	12	142	234852	234852	234852	234852	234852	204710	140588	140588	140575	1543	1543a	N2	1289	104	2		wild_type	ERR16083869		This study
S. enterica	Napoli (predicted)	202002909		2020	France	France	Nouvelle-Aquitaine	33	33230	FRI12		Human	Stool	06	07	Male	23	Isolated	SAL_DB4897AA	SAL_IC0557AA_AS	474	60	161	147	96	178	155	12	142	234888	234888	234888	234888	234888	234888	27733	27733	27729	1543	1543a	N2	1289	104	2		wild_type	ERR16083870		This study
S. enterica	Napoli (predicted)	202002946		2020	France	France	Nouvelle-Aquitaine	33	33600	FRI12	No Travel declared	Human	Stool	06	05	Female	35	Isolated	SAL_DB4896AA	SAL_IC0556AA_AS	474	60	161	147	96	178	155	12	142	234889	234889	234889	234889	140686	140686	27729	27729	27729	1543	1543a	N2	1289	104	2		wild_type	ERR16083871		This study
S. enterica	Napoli (predicted)	202002949		2020	France	France	Pays-de-la-Loire	85		FRG05		Human	Stool	06	04	Male	91		SAL_DB4950AA	SAL_IC0733AA_AS	474	60	161	147	96	178	155	12	142	234938	234938	234938	204687	204687	140587	140587	27729	27729	1543	1543a	N2	1289	104	2		wild_type	ERR16083872		This study
S. enterica	Napoli (predicted)	202002964		2020	France	France	Bourgogne_Franche-Comté	71		FRC13		Human	Stool	06	08	Male	3		SAL_DB4949AA	SAL_IC0732AA_AS	474	60	161	147	96	178	155	12	142	234937	234937	234937	234937	234852	204710	140588	140588	140575	1543	1543a	N2	1289	104	2		wild_type	ERR16083873		This study
S. enterica	Napoli (predicted)	202003003		2020	France	France	Pays-de-la-Loire	44	44650	FRG01		Human	Stool	06	06	Male	2	Isolated	SAL_DB4948AA	SAL_IC0731AA_AS	474	60	161	147	96	178	155	12	142	234935	234935	234935	234935	234935	140760	140587	27729	27729	1543	1543a	N2	1289	104	2		wild_type	ERR16083874		This study
S. enterica	Napoli (predicted)	202003052		2020	France	France	Pays-de-la-Loire	72	72400	FRG04		Human	Stool	06	10	Female	15		SAL_DB5613AA	SAL_IC1893AA_AS	474	60	161	147	96	178	155	12	142	235439	235439	235439	235439	235439	140611	27729	27729	27729	1543	1543a	N2	1289	104	2		wild_type	ERR16083875		This study
S. enterica	Napoli (predicted)	202003055		2020	France	France	Occitanie	81	81990	FRJ27		Human	Stool	06	10	Female	1	Isolated	SAL_DB5950AA	SAL_IC2443AA_AS	5168	60	161	147	96	1085	155	12	142	235585	235585	235585	235585	235585	140684	140575	140575	140575	1543	1543a	N2	1289	104	2		wild_type	ERR16083876		This study
S. enterica	Napoli (predicted)	202003067		2020	France	France	Centre_Val-de-Loire	37	37600	FRB04	No Travel declared	Human	Stool	06	10	Male	78	Isolated	SAL_DB9199AA	SAL_IC7779AA_AS	5168	60	161	147	96	1085	155	12	142	238273	238273	238273	238273	238273	238273	140579	140575	140575	1543	1543a	N2	1289	104	2		wild_type	ERR16083877		This study
S. enterica	Napoli (predicted)	202003080		2020	France	France	Centre_Val-de-Loire	41	41140	FRB05		Human	Stool	06	10	Female	63	Isolated	SAL_DB5807AA	SAL_IC1981AA_AS	474	60	161	147	96	178	155	12	142	235475	235475	235475	235475	235475	204620	27729	27729	27729	1543	1543a	N2	1289	104	2		wild_type	ERR16083878		This study
S. enterica	Napoli (predicted)	202003124		2020	France	France	Pays-de-la-Loire	85	85600	FRG05	No Travel declared	Human	Stool	06	09	Female	65	Isolated	SAL_DB5949AA	SAL_IC2442AA_AS	474	60	161	147	96	178	155	12	142	235583	235583	235583	235583	124002	124002	27729	27729	27729	1543	1543a	N2	1289	104	2		wild_type	ERR16083879		This study
S. enterica	Napoli (predicted)	202003130		2020	France	France	Ile-de-France	92	92120	FR105		Human	Stool	06	11	Female	55	Isolated	SAL_DB5947AA	SAL_IC2440AA_AS	474	60	161	147	96	178	155	12	142	235579	235579	235579	235579	124002	124002	27729	27729	27729	1543	1543a	N2	1289	104	2		wild_type	ERR16083880		This study
S. enterica	Napoli (predicted)	202003133		2020	France	France	Nouvelle-Aquitaine	33	33600	FRI12		Human	Stool	06	06	Female	5		SAL_DB5944AA	SAL_IC2437AA_AS	474	60	161	147	96	178	155	12	142	235580	235580	234889	234889	140686	140686	27729	27729	27729	1543	1543a	N2	1289	104	2		wild_type	ERR16083881		This study
S. enterica	Napoli (predicted)	202003142		2020	France	France	Ile-de-France	95	95600	FR108	No Travel declared	Human	Stool	06	30	Male	< 1	Isolated	SAL_DB5948AA	SAL_IC2441AA_AS	474	60	161	147	96	178	155	12	142	235584	235584	235584	235584	124002	124002	27729	27729	27729	1543	1543a	N2	1289	104	2		wild_type	ERR16083882		This study
S. enterica	Napoli (predicted)	202003227		2020	France	France	Pays-de-la-Loire	85	85110	FRG05	No Travel declared	Human	Stool	06	16	Male	< 1		SAL_DB6747AA	SAL_IC4220AA_AS	474	60	161	147	96	178	155	12	142	236476	236476	140665	140665	140665	140604	27729	27729	27729	1543	1543a	N2	1289	104	2		wild_type	ERR16083883		This study
S. enterica	Napoli (predicted)	202003446		2020	France	France	Nouvelle-Aquitaine	86	86000	FRI34		Human	Stool	06	24	Male	< 1	Isolated	SAL_DB7174AA	SAL_IC4938AA_AS	474	60	161	147	96	178	155	12	142	236792	236792	236792	236792	204714	140611	27729	27729	27729	1543	1543a	N2	1289	104	2		wild_type	ERR16083884		This study
S. enterica	Napoli (predicted)	202003458		2020	France	France	Pays-de-la-Loire	49	49440	FRG02	No Travel declared	Human	Stool	06	26	Male	62	Isolated	SAL_DB7175AA	SAL_IC4939AA_AS	474	60	161	147	96	178	155	12	142	236789	236789	236789	236789	140608	27733	27733	27733	27729	1543	1543a	N2	1289	104	2		wild_type	ERR16083885		This study
S. enterica	Napoli (predicted)	202003676		2020	France	France	Pays-de-la-Loire	53	53400	FRG03		Human	Stool	06	30	Male	78		SAL_DB8022AA	SAL_IC6503AA_AS	474	60	161	147	96	178	155	12	142	237536	237536	237536	236789	140608	27733	27733	27733	27729	1543	1543a	N2	1289	104	2		wild_type	ERR16083886		This study
S. enterica	Napoli (predicted)	202003707		2020	France	France	Provence-Alpes-Cote-dAzur	83	83430	FRL05		Human	Stool	07	03	Female	67	Isolated	SAL_DB8024AA	SAL_IC6505AA_AS	474	60	161	147	96	178	155	12	142	237534	237534	237534	204722	140749	130700	27729	27729	27729	1543	1543a	N2	1289	104	2		wild_type	ERR16083887		This study
S. enterica	Napoli (predicted)	202003722		2020	France	France	Pays-de-la-Loire	85		FRG05	No Travel declared	Human	Stool	07	04	Male	77	Isolated	SAL_DB8023AA	SAL_IC6504AA_AS	474	60	161	147	96	178	155	12	142	237533	237533	237533	140599	140599	140587	140587	27729	27729	1543	1543a	N2	1289	104	2		wild_type	ERR16083888		This study
S. enterica	Napoli (predicted)	202003726		2020	France	France	Occitanie	31		FRJ23		Human	Stool	07	06	Female	1		SAL_DB8211AA	SAL_IC6801AA_AS	5168	60	161	147	96	1085	155	12	142	237679	237679	237679	237679	176247	140684	140575	140575	140575	1543	1543a	N2	1289	104	2		wild_type	ERR16083889		This study
S. enterica	Napoli (predicted)	202003769		2020	France	France	Nouvelle-Aquitaine	79	79110	FRI33		Human	Urine	07	10	Female	83	Isolated	SAL_DB8210AA	SAL_IC6825AA_AS	474	60	161	147	96	178	155	12	142	237677	237677	237677	237677	140734	140653	27733	27733	27729	1543	1543a	N2	1289	104	2		wild_type	ERR16083890		This study
S. enterica	Napoli (predicted)	202003778		2020	France	France	Nouvelle-Aquitaine	24	24290	FRI11		Human	Stool	07	03	Female	1	Isolated	SAL_DB8212AA	SAL_IC6805AA_AS	474	60	161	147	96	178	155	12	142	237688	237685	237685	237685	237685	237685	27733	27733	27729	1543	1543a	N2	1289	104	2		wild_type	ERR16083891		This study
S. enterica	Napoli (predicted)	202003789		2020	France	France	Pays-de-la-Loire	49	49800	FRG02	No Travel declared	Human	Stool	07	08	Female	50		SAL_DB8261AA	SAL_IC6882AA_AS	474	60	161	147	96	178	155	12	142	237725	237725	237725	237725	237725	140604	27729	27729	27729	1543	1543a	N2	1289	104	2		wild_type	ERR16083892		This study
S. enterica	Napoli (predicted)	202003901		2020	France	France	Pays-de-la-Loire	44	44410	FRG01		Human	Stool	07	07	Male	6	Isolated	SAL_DB8753AA	SAL_IC7252AA_AS	474	60	161	147	96	178	155	12	142	237961	237961	237961	237961	140608	27733	27733	27733	27729	1543	1543a	N2	1289	104	2		wild_type	ERR16083893		This study
S. enterica	Napoli (predicted)	202003903		2020	France	Italy	Provence-Alpes-Cote-dAzur	06	06140	FRL03		Human	Stool	07	10	Female	75	Isolated	SAL_DB8754AA	SAL_IC7253AA_AS	2095	60	161	147	151	178	155	12	142	237953	237953	237953	237953	237953	237953	1748	1748	1450	1450	1450	N1	1289	104	2		wild_type	ERR16083894		This study
S. enterica	Napoli (predicted)	202003906		2020	France	France	Pays-de-la-Loire	49	49160	FRG02		Human	Stool	07	11	Male	56	Isolated	SAL_DB8755AA	SAL_IC7254AA_AS	474	60	161	147	96	178	155	12	142	237964	237964	237964	204865	140696	27729	27729	27729	27729	1543	1543a	N2	1289	104	2		wild_type	ERR16083895		This study
S. enterica	Napoli (predicted)	202003907		2020	France	France	Auvergne_Rhône-Alpes	01	01220	FRK21		Human	Stool	07	09	Female	67	Isolated	SAL_DB8752AA	SAL_IC7251AA_AS	474	60	161	147	96	178	155	12	142	237941	237941	237941	140600	140600	107044	24950	24950	1543	1543	1543b	N2	1289	104	2		wild_type	ERR16083896		This study
S. enterica	Napoli (predicted)	202004042		2020	France	France	Bretagne	56	56130	FRH04		Human	Stool	07	17	Male	37		SAL_DB9394AA	SAL_IC8637AA_AS	474	60	161	147	96	178	155	12	142	238666	238666	238666	238666	140612	27733	27733	27733	27729	1543	1543a	N2	1289	104	2		wild_type	ERR16083897		This study
S. enterica	Napoli (predicted)	202004056		2020	France	France	Nouvelle-Aquitaine	87	87210	FRI23		Human	Stool	07	18	Female	38	Isolated	SAL_DB9395AA	SAL_IC8638AA_AS	474	60	161	147	96	178	155	12	142	238678	238678	238678	238678	238678	27733	27733	27733	27729	1543	1543a	N2	1289	104	2		wild_type	ERR16083898		This study
S. enterica	Napoli (predicted)	202004097		2020	France	France	Ile-de-France	92	92230	FR105		Human	Stool	07	19	Male	3	Isolated	SAL_DB9450AA	SAL_IC8697AA_AS	474	60	161	147	96	178	155	12	142	238729	238729	238729	238729	238729	140611	27729	27729	27729	1543	1543a	N2	1289	104	2		wild_type	ERR16083899		This study
S. enterica	Napoli (predicted)	202004109		2020	France	France	Pays-de-la-Loire	85		FRG05		Human	Stool	07	18	Female	41	Isolated	SAL_DB9452AA	SAL_IC8699AA_AS	474	60	161	147	96	178	155	12	142	238732	238732	238732	238732	124002	124002	27729	27729	27729	1543	1543a	N2	1289	104	2		wild_type	ERR16083900		This study
S. enterica	Napoli (predicted)	202004127		2020	France	France	Pays-de-la-Loire	44	44600	FRG01		Human	Stool	07	18	Male	58	Isolated	SAL_DB9451AA	SAL_IC8698AA_AS	474	60	161	147	96	178	155	12	142	238730	238730	238730	27733	27733	27733	27733	27733	27729	1543	1543a	N2	1289	104	2		wild_type	ERR16083901		This study
S. enterica	Napoli (predicted)	202004214		2020	France	France	Pays-de-la-Loire	49	49380	FRG02		Human	Stool	07	16	Male	< 1	Isolated	SAL_DB9943AA	SAL_IC8939AA_AS	474	60	161	147	96	178	155	12	142	238856	238856	238856	238856	238856	124002	27729	27729	27729	1543	1543a	N2	1289	104	2		wild_type	ERR16083902		This study
S. enterica	Napoli (predicted)	202004221		2020	France	France	Nouvelle-Aquitaine	24	24000	FRI11		Human	Stool	07	23	Female	74		SAL_DB9939AA	SAL_IC8935AA_AS	474	60	161	147	96	178	155	12	142	238858	238858	238858	238858	238858	234468	27733	27733	27729	1543	1543a	N2	1289	104	2		wild_type	ERR16083903		This study
S. enterica	Napoli (predicted)	202004239		2020	France	France	Nouvelle-Aquitaine	24	24450	FRI11		Human	Stool	07	21	Female	43	Isolated	SAL_DB9942AA	SAL_IC8938AA_AS	474	60	161	147	96	178	155	12	142	238844	238844	238844	238844	176319	176319	27733	27733	27729	1543	1543a	N2	1289	104	2		wild_type	ERR16083904		This study
S. enterica	Napoli (predicted)	202004279		2020	France	France	Nouvelle-Aquitaine	47		FRI14		Human	Stool	07	21	Female	1	Isolated	SAL_DB9944AA	SAL_IC8940AA_AS	474	60	161	147	96	178	155	12	142	238849	238849	238849	238849	238849	238849	27733	27733	27729	1543	1543a	N2	1289	104	2		wild_type	ERR16083905		This study
S. enterica	Napoli (predicted)	202004290		2020	France	France	Provence-Alpes-Cote-dAzur	06	06800	FRL03		Human	Stool	07	24	Male	2		SAL_DB9938AA	SAL_IC8934AA_AS	474	60	161	147	96	178	155	12	142	238839	238839	238839	238839	238839	140577	26263	24950	1543	1543	1543b	N2	1289	104	2		wild_type	ERR16083906		This study
S. enterica	Napoli (predicted)	202004321		2020	France	France	Nouvelle-Aquitaine	47		FRI14		Human	Stool	07	23	Male	79		SAL_DB9941AA	SAL_IC8937AA_AS	474	60	161	147	96	178	155	12	142	238859	238859	238859	238859	238859	238859	27733	27733	27729	1543	1543a	N2	1289	104	2		wild_type	ERR16083907		This study
S. enterica	Napoli (predicted)	202004432		2020	France	France	Pays-de-la-Loire	85	85000	FRG05	No Travel declared	Human	Stool	07	26	Male	62	Isolated	SAL_EB0050AA	SAL_IC9075AA_AS	474	60	161	147	96	178	155	12	142	238923	238923	238923	140627	124002	124002	27729	27729	27729	1543	1543a	N2	1289	104	2		wild_type	ERR16083908		This study
S. enterica	Napoli (predicted)	202004477		2020	France	France	Nouvelle-Aquitaine	79	79310	FRI33		Human	Stool	07	29	Male	1	Isolated	SAL_EB0052AA	SAL_IC9077AA_AS	474	60	161	147	96	178	155	12	142	238912	238912	238912	238912	238912	140611	27729	27729	27729	1543	1543a	N2	1289	104	2		wild_type	ERR16083909		This study
S. enterica	Napoli (predicted)	202004504		2020	France	France	Nouvelle-Aquitaine	33	33140	FRI12		Human	Blood	07	31	Male	25	Isolated	SAL_EB0051AA	SAL_IC9076AA_AS	474	60	161	147	96	178	155	12	142	238933	238933	238933	238933	124002	124002	27729	27729	27729	1543	1543a	N2	1289	104	2		wild_type	ERR16083910		This study
S. enterica	Napoli (predicted)	202004515		2020	France		Auvergne_Rhône-Alpes	42	42550	FRK25		Human	Stool	07	27	Female	2		SAL_EB0672AA	SAL_JC0702AA_AS	4936	60	161	147	348	1059	155	12	142	239756	128182	128182	107104	107104	107104	20426	20426	7673	7673	7673	N1	1289	104	2		wild_type	ERR16083911		This study
S. enterica	Napoli (predicted)	202004519		2020	France	France	Nouvelle-Aquitaine	87	87520	FRI23	No Travel declared	Human	Stool	07	29	Male	60	Isolated	SAL_EB0567AA	SAL_JC0472AA_AS	474	60	161	147	96	178	155	12	142	239549	239549	239549	239549	239549	239549	27729	27729	27729	1543	1543a	N2	1289	104	2		wild_type	ERR16083912		This study
S. enterica	Napoli (predicted)	202004580		2020	France	France	Bretagne	56	56260	FRH04		Human	Stool	07	30	Male	5	Isolated	SAL_EB1204AA	SAL_JC2768AA_AS	474	60	161	147	96	178	155	12	142	240215	240215	240215	240215	140626	140626	140618	27729	27729	1543	1543a	N2	1289	104	2		wild_type	ERR16083913		This study
S. enterica	Napoli (predicted)	202004627		2020	France	France	Nouvelle-Aquitaine	19	19230	FRI21		Human	Stool	08	04	Male	64	Isolated	SAL_EB0673AA	SAL_JC0703AA_AS	474	60	161	147	96	178	155	12	142	239725	239725	239725	239725	239725	140580	27733	27733	27729	1543	1543a	N2	1289	104	2		wild_type	ERR16083914		This study
S. enterica	Napoli (predicted)	202004715		2020	France	France	Grand-Est	68	68480	FRF12		Human	Stool	08	06	Male	71	Isolated	SAL_EB0840AA	SAL_JC1604AA_AS	474	60	161	147	96	178	155	12	142	239839	239839	239839	239839	204888	204888	204873	204873	204873	1543	1543a	N2	1289	104	2		wild_type	ERR16083915		This study
S. enterica	Napoli (predicted)	202004744		2020	France	France	Pays-de-la-Loire	44	44470	FRG01		Human	Stool	08	05	Male	34	Isolated	SAL_EB0842AA	SAL_JC1606AA_AS	474	60	161	147	96	178	155	12	142	239859	239859	239859	239859	239859	140597	27729	27729	27729	1543	1543a	N2	1289	104	2		wild_type	ERR16083916		This study
S. enterica	Napoli (predicted)	202004761		2020	France	France	Nouvelle-Aquitaine	17	17610	FRI32		Human	Stool	08	03	Male	56	Isolated	SAL_EB0841AA	SAL_JC1605AA_AS	474	60	161	147	96	178	155	12	142	239840	239840	239840	239840	239840	239840	27729	27729	27729	1543	1543a	N2	1289	104	2		wild_type	ERR16083917		This study
S. enterica	Napoli (predicted)	202004798		2020	France	France	Provence-Alpes-Cote-dAzur	06	06200	FRL03		Human	Stool	08	08	Female	2		SAL_EB1203AA	SAL_JC2767AA_AS	474	60	161	147	96	178	155	12	142	240219	240219	240219	240219	240219	140577	26263	24950	1543	1543	1543b	N2	1289	104	2		wild_type	ERR16083918		This study
S. enterica	Napoli (predicted)	202004800		2020	France	France	Pays-de-la-Loire	53	53200	FRG03		Human	Stool	08	06	Female	51		SAL_EB1205AA	SAL_JC2769AA_AS	474	60	161	147	96	178	155	12	142	240220	240220	240220	240220	124002	124002	27729	27729	27729	1543	1543a	N2	1289	104	2		wild_type	ERR16083919		This study
S. enterica	Napoli (predicted)	202004874		2020	France	France	Occitanie	31	31620	FRJ23		Human	Stool	08	07	Female	< 1	Isolated	SAL_EB1241AA	SAL_JC3195AA_AS	474	60	161	147	96	178	155	12	142	240244	240244	240244	240244	240244	140643	27729	27729	27729	1543	1543a	N2	1289	104	2		wild_type	ERR16083920		This study
S. enterica	Napoli (predicted)	202004913		2020	France	France	Pays-de-la-Loire	49	49120	FRG02		Human	Blood	08	07	Female	97	Isolated	SAL_EB1580AA	SAL_JC4219AA_AS	474	60	161	147	96	178	155	12	142	240642	240642	240642	204631	204631	140611	27729	27729	27729	1543	1543a	N2	1289	104	2		wild_type	ERR16083921		This study
S. enterica	Napoli (predicted)	202004924		2020	France	France	Pays-de-la-Loire	49	49600	FRG02	No Travel declared	Human	Stool	08	11	Female	17		SAL_EB1581AA	SAL_JC4220AA_AS	474	60	161	147	96	178	155	12	142	240640	240640	240640	140603	124002	124002	27729	27729	27729	1543	1543a	N2	1289	104	2		wild_type	ERR16083922		This study
S. enterica	Napoli (predicted)	202004980		2020	France	France	Nouvelle-Aquitaine	24	24530	FRI11		Human	Stool	08	11	Male	80		SAL_EB1582AA	SAL_JC4221AA_AS	474	60	161	147	96	178	155	12	142	240644	240644	240644	240644	204690	140580	27733	27733	27729	1543	1543a	N2	1289	104	2		wild_type	ERR16083923		This study
S. enterica	Napoli (predicted)	202005122		2020	France		Provence-Alpes-Cote-dAzur	06		FRL03	No Travel declared	Human	Stool	08	17	Male	26	Isolated	SAL_EB2618AA	SAL_JC7407AA_AS	2019	60	161	147	348	178	155	12	142	241547	241547	241547	241547	241547	204691	20426	20426	7673	7673	7673	N1	1289	104	2		wild_type	ERR16083924		This study
S. enterica	Napoli (predicted)	202005131		2020	France	Italy	Provence-Alpes-Cote-dAzur	83	83100	FRL05	No Travel declared	Human	Stool	08	13	Male	80	Isolated	SAL_EB2617AA	SAL_JC7406AA_AS	2095	60	161	147	151	178	155	12	142	241549	241549	241549	241549	241549	241549	176238	176238	1450	1450	1450	N1	1289	104	2		wild_type	ERR16083925		This study
S. enterica	Napoli (predicted)	202005149		2020	France		Bretagne	22		FRH01	No Travel declared	Human	Stool	08	17	Female	72	Isolated	SAL_EB2616AA	SAL_JC7405AA_AS	2019	60	161	147	348	178	155	12	142	241545	241545	241545	241545	241545	241545	25097	25097	7673	7673	7673	N1	1289	104	2		wild_type	ERR16083926		This study
S. enterica	Napoli (predicted)	202005254		2020	France	France	Nouvelle-Aquitaine	87	87190	FRI23	No Travel declared	Human	Stool	08	19	Male	70	Isolated	SAL_EB2718AA	SAL_JC7570AA_AS	5168	60	161	147	96	1085	155	12	142	241654	241654	241654	241654	241654	241654	241654	140575	140575	1543	1543a	N2	1289	104	2		wild_type	ERR16083927		This study
S. enterica	Napoli (predicted)	202005264		2020	France	France	Nouvelle-Aquitaine	17	17300	FRI32		Human	Stool	08	19	Male	63	Isolated	SAL_EB2905AA	SAL_JC8737AA_AS	474	60	161	147	96	178	155	12	142	241806	241806	241806	241806	241806	140604	27729	27729	27729	1543	1543a	N2	1289	104	2		wild_type	ERR16083928		This study
S. enterica	Napoli (predicted)	202005268		2020	France	France	Grand-Est	67	67640	FRF11		Human	Stool	08	20	Male	2	Isolated	SAL_EB2906AA	SAL_JC8738AA_AS	474	60	161	147	96	178	155	12	142	241805	241805	241805	234837	140601	107128	97218	24950	1543	1543	1543b	N2	1289	104	2		wild_type	ERR16083929		This study
S. enterica	Napoli (predicted)	202005287		2020	France	France	Grand-Est	67	67520	FRF11		Human	Stool	08	21	Female	50	Isolated	SAL_EB3121AA	SAL_JC9748AA_AS	474	60	161	147	96	178	155	12	142	242008	242008	131168	131168	124002	124002	27729	27729	27729	1543	1543a	N2	1289	104	2		wild_type	ERR16083930		This study
S. enterica	Napoli (predicted)	202005352		2020	France	France	Nouvelle-Aquitaine	86	86320	FRI34		Human	Stool	08	18	Female	71		SAL_EB3120AA	SAL_JC9747AA_AS	474	60	161	147	96	178	155	12	142	242007	242007	242007	242007	242007	140652	27729	27729	27729	1543	1543a	N2	1289	104	2		wild_type	ERR16083931		This study
S. enterica	Napoli (predicted)	202005354		2020	France	France	Bretagne	35	35008	FRH03		Human	Stool	08	20	Female	73	Isolated	SAL_EB3112AA	SAL_JC9739AA_AS	474	60	161	147	96	178	155	12	142	242002	242002	242002	204722	140749	130700	27729	27729	27729	1543	1543a	N2	1289	104	2		wild_type	ERR16083932		This study
S. enterica	Napoli (predicted)	202005356		2020	France	France	Pays-de-la-Loire	85	85510	FRG05		Human	Stool	08	24	Female	26	Isolated	SAL_EB3113AA	SAL_JC9740AA_AS	474	60	161	147	96	178	155	12	142	242006	242006	242006	242006	140734	140653	27733	27733	27729	1543	1543a	N2	1289	104	2		wild_type	ERR16083933		This study
S. enterica	Napoli (predicted)	202005361		2020	France	France	Pays-de-la-Loire	44	44340	FRG01	No Travel declared	Human	Stool	08	18	Female	65	Family	SAL_EB3115AA	SAL_JC9742AA_AS	474	60	161	147	96	178	155	12	142	242005	242005	242005	242005	242005	140597	27729	27729	27729	1543	1543a	N2	1289	104	2		wild_type	ERR16083934		This study
S. enterica	Napoli (predicted)	202005401		2020	France	France	Bretagne	35	35130	FRH03		Human	Stool	8	20	Female	86	Isolated	SAL_EB3114AA	SAL_JC9741AA_AS	474	60	161	147	96	178	155	12	142	242003	242003	242003	241999	204671	140611	27729	27729	27729	1543	1543a	N2	1289	104	2		wild_type	ERR16083935		This study
S. enterica	Napoli (predicted)	202005403		2020	France	France	Bretagne	35	35640	FRH03		Human	Stool	08	20	Male	40	Family	SAL_EB3111AA	SAL_JC9738AA_AS	474	60	161	147	96	178	155	12	142	242000	242000	241999	241999	204671	140611	27729	27729	27729	1543	1543a	N2	1289	104	2		wild_type	ERR16083936		This study
S. enterica	Napoli (predicted)	202005404		2020	France	France	Bretagne	35	35640	FRH03		Human	Stool	08	20	Male	< 1	Family	SAL_EB4037AA	SAL_KC2251AA_AS	474	60	161	147	96	178	155	12	142	242000	242000	241999	241999	204671	140611	27729	27729	27729	1543	1543a	N2	1289	104	2		wild_type	ERR16083937		This study
S. enterica	Napoli (predicted)	202005444		2020	France	France	Pays-de-la-Loire	49	49350	FRG02		Human	Stool	08	25	Male	3	Isolated	SAL_EB3109AA	SAL_JC9736AA_AS	474	60	161	147	96	178	155	12	142	242014	242014	242014	140756	27733	27733	27733	27733	27729	1543	1543a	N2	1289	104	2		wild_type	ERR16083938		This study
S. enterica	Napoli (predicted)	202005447		2020	France	France	Bretagne	35	35210	FRH03		Human	Stool	08	20	Male	47		SAL_EB3110AA	SAL_JC9737AA_AS	474	60	161	147	96	178	155	12	142	241999	241999	241999	241999	204671	140611	27729	27729	27729	1543	1543a	N2	1289	104	2		wild_type	ERR16083939		This study
S. enterica	Napoli (predicted)	202005448		2020	France	France	Pays-de-la-Loire	49	49390	FRG02		Human	Stool	8	24	Female	15		SAL_EB3117AA	SAL_JC9744AA_AS	474	60	161	147	96	178	155	12	142	242004	241999	241999	241999	204671	140611	27729	27729	27729	1543	1543a	N2	1289	104	2		wild_type	ERR16083940		This study
S. enterica	Napoli (predicted)	202005450		2020	France	France	Nouvelle-Aquitaine	17	17520	FRI32		Human	Blood	08	24	Male	88		SAL_EB3116AA	SAL_JC9743AA_AS	474	60	161	147	96	178	155	12	142	242011	242011	242011	216248	216248	140653	27733	27733	27729	1543	1543a	N2	1289	104	2		wild_type	ERR16083941		This study
S. enterica	Napoli (predicted)	202005452		2020	France	France	Centre_Val-de-Loire	41	41700	FRB05		Human	Stool	08	19	Female	72	Isolated	SAL_EB3119AA	SAL_JC9746AA_AS	474	60	161	147	96	178	155	12	142	242010	242010	242010	242010	242010	204620	27729	27729	27729	1543	1543a	N2	1289	104	2		wild_type	ERR16083942		This study
S. enterica	Napoli (predicted)	202005488		2020	France	France	Nouvelle-Aquitaine	87	87130	FRI23		Human	Stool	08	25	Female	53	Isolated	SAL_EB2968AA	SAL_JC9515AA_AS	474	60	161	147	96	178	155	12	142	241867	241867	241867	241867	241867	140653	27733	27733	27729	1543	1543a	N2	1289	104	2		wild_type	ERR16083943		This study
S. enterica	Napoli (predicted)	202005513		2020	France	France	Pays-de-la-Loire	49		FRG02		Human	Stool	08	22	Male	< 1		SAL_EB2967AA	SAL_JC9514AA_AS	474	60	161	147	96	178	155	12	142	241866	241866	241866	204716	204716	204716	27729	27729	27729	1543	1543a	N2	1289	104	2		wild_type	ERR16083944		This study
S. enterica	Napoli (predicted)	202005547		2020	France	France	Nouvelle-Aquitaine	33	33600	FRI12		Human	Stool	08	26	Male	2	Isolated	SAL_EB3820AA	SAL_KC1036AA_AS	474	60	161	147	96	178	155	12	142	242158	242158	242158	242158	242158	234468	27733	27733	27729	1543	1543a	N2	1289	104	2		wild_type	ERR16083945		This study
S. enterica	Napoli (predicted)	202005593		2020	France	France	Nouvelle-Aquitaine	19	19200	FRI21	No Travel declared	Human	Stool	08	26	Female	17	Isolated	SAL_EB4039AA	SAL_KC2253AA_AS	474	60	161	147	96	178	155	12	142	242765	242764	242764	242764	204687	140587	140587	27729	27729	1543	1543a	N2	1289	104	2		wild_type	ERR16083946		This study
S. enterica	Napoli (predicted)	202005607		2020	France	France	Bretagne	56	56100	FRH04		Human	Stool	08	27	Male	70	Isolated	SAL_EB4038AA	SAL_KC2252AA_AS	474	60	161	147	96	178	155	12	142	242764	242764	242764	242764	204687	140587	140587	27729	27729	1543	1543a	N2	1289	104	2		wild_type	ERR16083947		This study
S. enterica	Napoli (predicted)	202005611		2020	France	France	Nouvelle-Aquitaine	23	23000	FRI22		Human	Urine	08	25	Female	77	Isolated	SAL_EB4035AA	SAL_KC2249AA_AS	474	60	161	147	96	178	155	12	142	242762	242762	242762	242007	242007	140652	27729	27729	27729	1543	1543a	N2	1289	104	2	blaTEM-1,sul2,dfrA1	wild_type	ERR16083948		This study
S. enterica	Napoli (predicted)	202005614		2020	France	France	Auvergne_Rhône-Alpes	15	15000	FRK12		Human	Stool	08	28	Male	1		SAL_EB4041AA	SAL_KC2255AA_AS	474	60	161	147	96	178	155	12	142	242763	242763	242763	242763	242763	204864	140588	140588	140575	1543	1543a	N2	1289	104	2		wild_type	ERR16083949		This study
S. enterica	Napoli (predicted)	202005639		2020	France	France	Centre_Val-de-Loire	45	45420	FRB06		Human	Stool	08	25	Female	49	Isolated	SAL_EB4040AA	SAL_KC2254AA_AS	474	60	161	147	96	178	155	12	142	242769	242769	242769	242769	176313	176313	140616	27729	27729	1543	1543a	N2	1289	104	2		wild_type	ERR16083950		This study
S. enterica	Napoli (predicted)	202005651		2020	France	France	Bretagne	56	56800	FRH04		Human	Stool	08	29	Female	7		SAL_EB4042AA	SAL_KC2256AA_AS	474	60	161	147	96	178	155	12	142	242771	242771	242771	242771	140619	27733	27733	27733	27729	1543	1543a	N2	1289	104	2		wild_type	ERR16083951		This study
S. enterica	Napoli (predicted)	202005682		2020	France	France	Centre_Val-de-Loire	37	37250	FRB04		Human	Stool	08	28	Female	2		SAL_EB4044AA	SAL_KC2258AA_AS	474	60	161	147	96	178	155	12	142	242766	242766	242766	242766	216231	140652	27729	27729	27729	1543	1543a	N2	1289	104	2		wild_type	ERR16083952		This study
S. enterica	Napoli (predicted)	202005705		2020	France	France	Occitanie	46	46100	FRJ25		Human	Stool	08	31	Female	70		SAL_EB4036AA	SAL_KC2250AA_AS	474	60	161	147	96	178	155	12	142	242787	242787	242764	242764	204687	140587	140587	27729	27729	1543	1543a	N2	1289	104	2	blaTEM-1,sat2,aadA1,sul2,dfrA1	wild_type	ERR16083953		This study
S. enterica	Napoli (predicted)	202005710		2020	France	France	Pays-de-la-Loire	49	49220	FRG02		Human	Stool	08	28	Male	4		SAL_EB4043AA	SAL_KC2257AA_AS	474	60	161	147	96	178	155	12	142	242767	242767	242767	216289	27733	27733	27733	27733	27729	1543	1543a	N2	1289	104	2		wild_type	ERR16083954		This study
S. enterica	Napoli (predicted)	202005731		2020	France	France	Pays-de-la-Loire	44	44660	FRG01		Human	Stool	08	31	Female	45		SAL_EB4237AA	SAL_KC2458AA_AS	474	60	161	147	96	178	155	12	142	242920	242920	242920	140645	124002	124002	27729	27729	27729	1543	1543a	N2	1289	104	2		wild_type	ERR16083955		This study
S. enterica	Napoli (predicted)	202005747		2020	France	France	Provence-Alpes-Cote-dAzur	13	13180	FRL04		Human	Stool	08	29	Female	59	Isolated	SAL_EB4840AA	SAL_KC3793AA_AS	474	60	161	147	96	178	155	12	142	243197	243197	243197	243197	124002	124002	27729	27729	27729	1543	1543a	N2	1289	104	2		wild_type	ERR16083956		This study
S. enterica	Napoli (predicted)	202005755		2020	France	France	Nouvelle-Aquitaine	87	87700	FRI23		Human	Stool	08	31	Female	84	Isolated	SAL_EB4238AA	SAL_KC2459AA_AS	474	60	161	147	96	178	155	12	142	242922	242922	242922	242922	242922	140653	27733	27733	27729	1543	1543a	N2	1289	104	2		wild_type	ERR16083957		This study
S. enterica	Napoli (predicted)	202005787		2020	France	France	Ile-de-France	78	78700	FR103		Human	Stool	09	01	Female	2	Isolated	SAL_EB4234AA	SAL_KC2455AA_AS	474	60	161	147	96	178	155	12	142	242916	242916	242916	242916	140688	140611	27729	27729	27729	1543	1543a	N2	1289	104	2		wild_type	ERR16083958		This study
S. enterica	Napoli (predicted)	202005795		2020	France	France	Pays-de-la-Loire	49	49300	FRG02		Human	Stool	09	01	Female	81	Isolated	SAL_EB4235AA	SAL_KC2456AA_AS	474	60	161	147	96	178	155	12	142	242918	242918	242918	242918	124002	124002	27729	27729	27729	1543	1543a	N2	1289	104	2		wild_type	ERR16083959		This study
S. enterica	Napoli (predicted)	202005805		2020	France	France	Bretagne	29	29380	FRH02		Human	Stool	09	01	Female	54	Isolated	SAL_EB4236AA	SAL_KC2457AA_AS	474	60	161	147	96	178	155	12	142	242919	242919	242764	242764	204687	140587	140587	27729	27729	1543	1543a	N2	1289	104	2		wild_type	ERR16083960		This study
S. enterica	Napoli (predicted)	202005867		2020	France	France	Nouvelle-Aquitaine	16	16730	FRI31		Human	Stool	09	26	Male	3	Isolated	SAL_EB4841AA	SAL_KC3794AA_AS	474	60	161	147	96	178	155	12	142	243199	243199	243199	243199	243199	140653	27733	27733	27729	1543	1543a	N2	1289	104	2		wild_type	ERR16083961		This study
S. enterica	Napoli (predicted)	202005883		2020	France	France	Pays-de-la-Loire	44	44770	FRG01		Human	Stool	09	05	Male	71	Isolated	SAL_EB5030AA	SAL_KC5289AA_AS	474	60	161	147	96	178	155	12	142	243625	243625	243625	140628	27733	27733	27733	27733	27729	1543	1543a	N2	1289	104	2		wild_type	ERR16083962		This study
S. enterica	Napoli (predicted)	202005900		2020	France	France	Pays-de-la-Loire	44	44500	FRG01		Human	Urine	09	02	Female	82	Isolated	SAL_EB5029AA	SAL_KC5288AA_AS	474	60	161	147	96	178	155	12	142	243624	243624	243624	243624	140619	27733	27733	27733	27729	1543	1543a	N2	1289	104	2		wild_type	ERR16083963		This study
S. enterica	Napoli (predicted)	202005947		2020	France	France	Nouvelle-Aquitaine	33	33490	FRI12	No Travel declared	Human	Stool	09	01	Female	92	Isolated	SAL_EB5027AA	SAL_KC5286AA_AS	5168	60	161	147	96	1085	155	12	142	243623	243623	140575	140575	140575	140575	140575	140575	140575	1543	1543a	N2	1289	104	2		wild_type	ERR16083964		This study
S. enterica	Napoli (predicted)	202005976		2020	France	France	Nouvelle-Aquitaine	17	17700	FRI32	No Travel declared	Human	Stool	09	03	Male	1	Isolated	SAL_EB5032AA	SAL_KC5291AA_AS	474	60	161	147	96	178	155	12	142	243628	243628	243628	243628	243628	140604	27729	27729	27729	1543	1543a	N2	1289	104	2		wild_type	ERR16083965		This study
S. enterica	Napoli (predicted)	202005984		2020	France	France	Pays-de-la-Loire	44	44470	FRG01	No Travel declared	Human	Blood	8	17	Male	72	Family	SAL_EB5025AA	SAL_KC5162AA_AS	474	60	161	147	96	178	155	12	142	243621	243621	243621	243621	204640	140597	27729	27729	27729	1543	1543a	N2	1289	104	2		wild_type	ERR16083966		This study
S. enterica	Napoli (predicted)	202005986		2020	France	France	Pays-de-la-Loire	44	44120	FRG01		Human	Blood	09	22	Male	64	Isolated	SAL_EB5031AA	SAL_KC5290AA_AS	474	60	161	147	96	178	155	12	142	243626	243626	243626	243626	243626	140597	27729	27729	27729	1543	1543a	N2	1289	104	2		wild_type	ERR16083967		This study
S. enterica	Napoli (predicted)	202006004		2020	France	France	Pays-de-la-Loire	44	44230	FRG01	No Travel declared	Human	Stool	09	31	Male	3	Isolated	SAL_EB5026AA	SAL_KC5285AA_AS	474	60	161	147	96	178	155	12	142	243627	243627	243627	243627	243627	140597	27729	27729	27729	1543	1543a	N2	1289	104	2		wild_type	ERR16083968		This study
S. enterica	Napoli (predicted)	202006057		2020	France	France	Bretagne	35	35370	FRH03		Human	Stool	09	05	Female	87		SAL_EB5164AA	SAL_KC5641AA_AS	474	60	161	147	96	178	155	12	142	243752	243752	243752	140599	140599	140587	140587	27729	27729	1543	1543a	N2	1289	104	2		wild_type	ERR16083969		This study
S. enterica	Napoli (predicted)	202006058		2020	France	France	Bretagne	35	35680	FRH03		Human	Stool	09	05	Female	26		SAL_EB5165AA	SAL_KC5642AA_AS	474	60	161	147	96	178	155	12	142	243817	243817	243752	140599	140599	140587	140587	27729	27729	1543	1543a	N2	1289	104	2		wild_type	ERR16083970		This study
S. enterica	Napoli (predicted)	202006086		2020	France	France	Nouvelle-Aquitaine	86	86100	FRI34		Human	Stool	09	04	Male	63	Isolated	SAL_EB5167AA	SAL_KC5548AA_AS	474	60	161	147	96	178	155	12	142	243760	243760	243760	243760	217629	140729	27729	27729	27729	1543	1543a	N2	1289	104	2		wild_type	ERR16083971		This study
S. enterica	Napoli (predicted)	202006107		2020	France	France	Pays-de-la-Loire	49	49500	FRG02		Human	Stool	09	04	Female	2		SAL_EB5163AA	SAL_KC5640AA_AS	474	60	161	147	96	178	155	12	142	243822	243751	243751	243751	140608	27733	27733	27733	27729	1543	1543a	N2	1289	104	2		wild_type	ERR16083972		This study
S. enterica	Napoli (predicted)	202006168		2020	France	France	Pays-de-la-Loire	44	44570	FRG01		Human	Stool	09	08	Female	83		SAL_EB5166AA	SAL_KC5643AA_AS	474	60	161	147	96	178	155	12	142	243820	243755	243755	243755	27733	27733	27733	27733	27729	1543	1543a	N2	1289	104	2		wild_type	ERR16083973		This study
S. enterica	Napoli (predicted)	202006210		2020	France	France	Bourgogne_Franche-Comté	70	70400	FRC23		Human	Stool	09	12	Female	1		SAL_EB6028AA	SAL_KC6569AA_AS	474	60	161	147	96	178	155	12	142	243924	243924	243924	140733	140601	107128	97218	24950	1543	1543	1543b	N2	1289	104	2		wild_type	ERR16083974		This study
S. enterica	Napoli (predicted)	202006238		2020	France	France	Pays-de-la-Loire	44		FRG01		Human	Stool	09	12	Male	40	Isolated	SAL_EB6027AA	SAL_KC6568AA_AS	474	60	161	147	96	178	155	12	142	243923	243923	242764	242764	204687	140587	140587	27729	27729	1543	1543a	N2	1289	104	2		wild_type	ERR16083975		This study
S. enterica	Napoli (predicted)	202006250		2020	France	France	Grand-Est	51	51100	FRF23		Human	Stool	09	10	Female	1	Isolated	SAL_EB6029AA	SAL_KC6570AA_AS	474	60	161	147	96	178	155	12	142	243918	243918	243918	243918	233884	140597	27729	27729	27729	1543	1543a	N2	1289	104	2		wild_type	ERR16083976		This study
S. enterica	Napoli (predicted)	202006341		2020	France	France	Nouvelle-Aquitaine	87	87000	FRI23		Human	Stool	09	09	Female	< 1	Isolated	SAL_EB6210AA	SAL_KC6852AA_AS	474	60	161	147	96	178	155	12	142	244408	244408	244408	244408	176319	176319	27733	27733	27729	1543	1543a	N2	1289	104	2		wild_type	ERR16083977		This study
S. enterica	Napoli (predicted)	202006487		2020	France	France	Bretagne	56	56100	FRH04		Human	Blood	09	18	Male	86	Isolated	SAL_EB7048AA	SAL_KC7726AA_AS	474	60	161	147	96	178	155	12	142	244864	244864	244864	244864	124002	124002	27729	27729	27729	1543	1543a	N2	1289	104	2		wild_type	ERR16083978		This study
S. enterica	Napoli (predicted)	202006492		2020	France	France	Pays-de-la-Loire	44		FRG01		Human	Blood	09	18	Female	94	Isolated	SAL_EB7422AA	SAL_KC8236AA_AS	474	60	161	147	96	178	155	12	142	245164	245164	204715	204715	140608	27733	27733	27733	27729	1543	1543a	N2	1289	104	2		wild_type	ERR16083979		This study
S. enterica	Napoli (predicted)	202006526		2020	France	France	Ile-de-France	75	75012	FR101	No Travel declared	Human	Stool	09	18	Female	44	Isolated	SAL_EB7424AA	SAL_KC8240AA_AS	474	60	161	147	96	178	155	12	142	245167	245167	204628	204628	204628	204628	27729	27729	27729	1543	1543a	N2	1289	104	2		wild_type	ERR16083980		This study
S. enterica	Napoli (predicted)	202006558		2020	France	France	Pays-de-la-Loire	44	44340	FRG01	No Travel declared	Human	Stool	09	15	Male	1	Isolated	SAL_EB7420AA	SAL_KC8234AA_AS	474	60	161	147	96	178	155	12	142	245161	245161	245161	245161	233884	140597	27729	27729	27729	1543	1543a	N2	1289	104	2		wild_type	ERR16083981		This study
S. enterica	Napoli (predicted)	202006581		2020	France	France	Centre_Val-de-Loire	41	41400	FRB05		Human	Stool	09	02	Male	84		SAL_EB7425AA	SAL_KC8238AA_AS	474	60	161	147	96	178	155	12	142	245165	245165	245165	245165	235475	204620	27729	27729	27729	1543	1543a	N2	1289	104	2		wild_type	ERR16083982		This study
S. enterica	Napoli (predicted)	202006582		2020	France	France	Centre_Val-de-Loire	37	37540	FRB04		Human	Stool	09	09	Male	21		SAL_EB7427AA	SAL_KC8241AA_AS	474	60	161	147	96	178	155	12	142	245168	245168	245168	245168	245168	140652	27729	27729	27729	1543	1543a	N2	1289	104	2		wild_type	ERR16083983		This study
S. enterica	Napoli (predicted)	202006614		2020	France	France	Nouvelle-Aquitaine	24	24800	FRI11		Human	Stool	09	22	Female	52		SAL_EB7421AA	SAL_KC8235AA_AS	474	60	161	147	96	178	155	12	142	245162	245162	245162	245162	245162	140580	27733	27733	27729	1543	1543a	N2	1289	104	2		wild_type	ERR16083984		This study
S. enterica	Napoli (predicted)	202006618		2020	France	France	Occitanie	12		FRJ22		Human	Stool	09	22	Male	6	Isolated	SAL_EB7423AA	SAL_KC8237AA_AS	474	60	161	147	96	178	155	12	142	245163	245163	245163	245163	245163	204710	140588	140588	140575	1543	1543a	N2	1289	104	2		wild_type	ERR16083985		This study
S. enterica	Napoli (predicted)	202006648		2020	France	France	Pays-de-la-Loire	44	44420	FRG01		Human	Stool	09	24	Female	55	Isolated	SAL_EB7426AA	SAL_KC8239AA_AS	474	60	161	147	96	178	155	12	142	245166	216293	216293	216293	140608	27733	27733	27733	27729	1543	1543a	N2	1289	104	2		wild_type	ERR16083986		This study
S. enterica	Napoli (predicted)	202006670		2020	France	France	Nouvelle-Aquitaine	87		FRI23		Human	Stool	09	25	Male	29	Isolated	SAL_EB7419AA	SAL_KC8233AA_AS	474	60	161	147	96	178	155	12	142	245160	245160	245160	245160	204729	176319	27733	27733	27729	1543	1543a	N2	1289	104	2		wild_type	ERR16083987		This study
S. enterica	Napoli (predicted)	202006690		2020	France	France	Pays-de-la-Loire	44	44780	FRG01		Human	Stool	09	25	Male	64	Isolated	SAL_EB7737AA	SAL_KC8956AA_AS	474	60	161	147	96	178	155	12	142	245505	245505	245505	245505	245505	27733	27733	27733	27729	1543	1543a	N2	1289	104	2		wild_type	ERR16083988		This study
S. enterica	Napoli (predicted)	202006702		2020	France	France	Pays-de-la-Loire	44	44120	FRG01	No Travel declared	Human	Stool	09	18	Female	6	Family	SAL_EB7739AA	SAL_KC8958AA_AS	474	60	161	147	96	178	155	12	142	245510	245510	245510	216289	27733	27733	27733	27733	27729	1543	1543a	N2	1289	104	2		wild_type	ERR16083989		This study
S. enterica	Napoli (predicted)	202006704		2020	France	France	Pays-de-la-Loire	49		FRG02		Human	Blood	09	25	Male	77	Isolated	SAL_EB7738AA	SAL_KC8957AA_AS	474	60	161	147	96	178	155	12	142	245490	245490	245490	204741	204741	140611	27729	27729	27729	1543	1543a	N2	1289	104	2		wild_type	ERR16083990		This study
S. enterica	Napoli (predicted)	202006756		2020	France	France	Pays-de-la-Loire	44	44570	FRG01		Human	Stool	09	22	Female	< 1	Isolated	SAL_EB7845AA	SAL_KC9176AA_AS	474	60	161	147	96	178	155	12	142	245593	245593	245593	245593	140647	27733	27733	27733	27729	1543	1543a	N2	1289	104	2		wild_type	ERR16083991		This study
S. enterica	Napoli (predicted)	202006779		2020	France	France	Pays-de-la-Loire	72		FRG04		Human	Stool	09	28	Female	87	Isolated	SAL_EB7844AA	SAL_KC9175AA_AS	474	60	161	147	96	178	155	12	142	245592	245592	245592	245592	124002	124002	27729	27729	27729	1543	1543a	N2	1289	104	2		wild_type	ERR16083992		This study
S. enterica	Napoli (predicted)	202006780		2020	France	France	Pays-de-la-Loire	44	44520	FRG01		Human	Stool	9	24	Female	< 1		SAL_EB8689AA	SAL_LC0913AA_AS	474	60	161	147	96	178	155	12	142	246304	246304	246304	140645	124002	124002	27729	27729	27729	1543	1543a	N2	1289	104	2		wild_type	ERR16083993		This study
S. enterica	Napoli (predicted)	202006783		2020	France	France	Bretagne	56	56100	FRH04		Human	Stool	09	29	Female	89	Isolated	SAL_EB8375AA	SAL_LC0091AA_AS	474	60	161	147	96	178	155	12	142	245782	245782	245782	245782	27733	27733	27733	27733	27729	1543	1543a	N2	1289	104	2	blaTEM-135,aadA1,aadA2,sul3,dfrA12,tet(A),cmlA1	wild_type	ERR16083994		This study
S. enterica	Napoli (predicted)	202006812		2020	France	France	Pays-de-la-Loire	44	44650	FRG01		Human	Stool	09	28	Male	59	Isolated	SAL_EB7907AA	SAL_KC9238AA_AS	474	60	161	147	96	178	155	12	142	245658	245658	245658	245658	245658	140690	27729	27729	27729	1543	1543a	N2	1289	104	2		wild_type	ERR16083995		This study
S. enterica	Napoli (predicted)	202006816		2020	France	France	Pays-de-la-Loire	49	49460	FRG02		Human	Stool	10	01	Female	73		SAL_EB7905AA	SAL_KC9236AA_AS	474	60	161	147	96	178	155	12	142	245652	245652	245652	245652	140688	140611	27729	27729	27729	1543	1543a	N2	1289	104	2		wild_type	ERR16083996		This study
S. enterica	Napoli (predicted)	202006836		2020	France	France	Pays-de-la-Loire	72	72200	FRG04		Human	Stool	10	01	Female	72		SAL_EB7906AA	SAL_KC9237AA_AS	474	60	161	147	96	178	155	12	142	245653	245653	245653	245653	245653	245653	27729	27729	27729	1543	1543a	N2	1289	104	2		wild_type	ERR16083997		This study
S. enterica	Napoli (predicted)	202006846		2020	France	France	Pays-de-la-Loire	44	44330	FRG01		Human	Stool	09	27	Male	85		SAL_EB7904AA	SAL_KC9235AA_AS	474	60	161	147	96	178	155	12	142	245654	245654	245654	245654	245654	124002	27729	27729	27729	1543	1543a	N2	1289	104	2		wild_type	ERR16083998		This study
S. enterica	Napoli (predicted)	202006850		2020	France	France	Pays-de-la-Loire	85	85710	FRG05		Human	Stool	09	29	Female	91	Isolated	SAL_EB7908AA	SAL_KC9239AA_AS	474	60	161	147	96	178	155	12	142	245655	245655	245655	245655	27733	27733	27733	27733	27729	1543	1543a	N2	1289	104	2		wild_type	ERR16083999		This study
S. enterica	Napoli (predicted)	202006916		2020	France	France	Pays-de-la-Loire	44	44120	FRG01		Human	Stool	9	30	Male	8	Family	SAL_EB8608AA	SAL_LC0711AA_AS	474	60	161	147	96	178	155	12	142	246219	246219	245510	216289	27733	27733	27733	27733	27729	1543	1543a	N2	1289	104	2		wild_type	ERR16084000		This study
S. enterica	Napoli (predicted)	202007041		2020	France	France	Nouvelle-Aquitaine	24	24160	FRI11		Human	Stool	10	6	Male	< 1		SAL_EB9388AA	SAL_LC2925AA_AS	474	60	161	147	96	178	155	12	142	247038	247038	247038	247038	247038	140580	27733	27733	27729	1543	1543a	N2	1289	104	2		wild_type	ERR16084001		This study
S. enterica	Napoli (predicted)	202007061		2020	France	France	Nouvelle-Aquitaine	33	33185 (LAM)	FRI12		Human	Stool	10	1	Female	3		SAL_EB9418AA	SAL_LC2955AA_AS	474	60	161	147	96	178	155	12	142	247067	247067	247067	247067	140640	140576	27733	27733	27729	1543	1543a	N2	1289	104	2		wild_type	ERR16084002		This study
S. enterica	Napoli (predicted)	202007090		2020	France	France	Pays-de-la-Loire	44	44117	FRG01		Human	Stool	10	9	Male	1	Isolated	SAL_FB0253AA	SAL_LC4333AA_AS	474	60	161	147	96	178	155	12	142	247860	247860	247860	243624	140619	27733	27733	27733	27729	1543	1543a	N2	1289	104	2		wild_type	ERR16084003		This study
S. enterica	Napoli (predicted)	202007101		2020	France	France	Nouvelle-Aquitaine	33	33230	FRI12		Human	Stool	9	25	Male	69	Isolated	SAL_EB9417AA	SAL_LC2954AA_AS	474	60	161	147	96	178	155	12	142	247071	247071	247071	247071	247071	247071	27733	27733	27729	1543	1543a	N2	1289	104	2		wild_type	ERR16084004		This study
S. enterica	Napoli (predicted)	202007380		2020	France	France	Nouvelle-Aquitaine	17	17670	FRI32	No Travel declared	Human	Stool	10	18	Female	87	Isolated	SAL_FB0646AA	SAL_LC4979AA_AS	474	60	161	147	96	178	155	12	142	248210	248210	248210	140680	140655	140655	27729	27729	27729	1543	1543a	N2	1289	104	2		wild_type	ERR16084005		This study
S. enterica	Napoli (predicted)	202007635		2020	France	France	Pays-de-la-Loire	44	44830	FRG01		Human	Urine	10	30	Female	61	Isolated	SAL_FB1933AA	SAL_LC8254AA_AS	8214	60	161	147	96	178	155	1154	142	249320	249320	249320	249320	249320	140597	27729	27729	27729	1543	1543a	N2	1289	104	2		wild_type	ERR16084006		This study
S. enterica	Napoli (predicted)	202007763		2020	France	France	Nouvelle-Aquitaine	87	87800	FRI23		Human	Stool	11	1	Female	72	Isolated	SAL_FB2320AA	SAL_LC9196AA_AS	474	60	161	147	96	178	155	12	142	249529	249529	249529	249529	176319	176319	27733	27733	27729	1543	1543a	N2	1289	104	2		wild_type	ERR16084007		This study
S. enterica	Napoli (predicted)	202007788		2020	France	France	Grand-Est	67	67370	FRF11	No Travel declared	Human	Stool	11	5	Female	5	Family	SAL_FB2452AA	SAL_LC9467AA_AS	474	60	161	147	96	178	155	12	142	249721	249721	249721	249721	249721	140604	27729	27729	27729	1543	1543a	N2	1289	104	2		wild_type	ERR16084008		This study
S. enterica	Napoli (predicted)	202008268		2020	France	France	Grand-Est	67	67370	FRF11	No Travel declared	Human	Stool	11	9	Female	35	Family	SAL_FB4687AA	SAL_MC3870AA_AS	474	60	161	147	96	178	155	12	142	251638	251638	251638	251638	249721	140604	27729	27729	27729	1543	1543a	N2	1289	104	2		wild_type	ERR16084009		This study
S. enterica	Napoli (predicted)	202008491		2020	France	France	Nouvelle-Aquitaine	33	33505 (LAM)	FRI12		Human	Stool	12	12	Male	8		SAL_FB6383AA	SAL_MC6043AA_AS	474	60	161	147	96	178	155	12	142	252901	252901	252901	252901	252901	252901	27733	27733	27729	1543	1543a	N2	1289	104	2		wild_type	ERR16084010		This study
[truncated: 3 more rows]
[truncated: 8 more columns]
