# Supplementary material for: Global population genomics of Salmonella enterica serotype Napoli, an emerging pathogen with an unusual epidemiologic pattern
Source: Research Square preprint supplement (doi:10.21203/rs.3.rs-8608855/v1), 2026-01-16
Supplement: Supplementary file 8 [file c2ceb68e2ef6de713698aa87.xlsx]

## Sheet: Data 7
			Results of VFAnalyzer : Hits in complete genome													Hits in 1,191 pan-genomes
Virulence Factor (VF) class	Virulence factors		isolate: Nap72-2 HC900_1543a_HC200_27729	isolate: Nap90-23 HC900_1543a_HC400_140575	isolate: ISS_75/4/18 HC900_1543b	isolate: ISS_88/1/03 HC900_1543ab	isolate: 20154936 HC900_1543c	isolate: ISS_61/2/17 HC900_94666	isolate: ISS_67/2/09 HC900_20879	isolate: ISS_82/7/10 HC900_7673	isolate: 202208589 HC900_63054	isolate: 16-174478 HC900_1450	isolate: ISS_61/4/17 HC900_94001	isolate: ISS_133/3/03 HC900_107120	isolate: ISS_85/16/14 HC900_107023	Gene	Non-unique Gene name	Gene category in Pan-genome	No. of pan-genomes in which the gene is present	% of presence in all pan-genomes (n=1,191)	% in HC900_1543a HC200_27729 (n=373)	% in HC900_1543a HC200_27733 (n=183)	% in HC900_1543a HC400_140575 (n=49)	% in HC900_1543b (n=315)	% in HC900_1543c (n=30)	% in HC900_20879 (n=40)	% in HC900_7673 (n=68)	% in HC900_1450 (n=58)	% in HC900_107023 (n=21)
Fimbrial adherence determinants	Agf/Csg	csgA	1	1	1	1	1	1	1	1	1	1	1	1	1	csgA	csgA	core	1190	99.916	100	100	100	100	100	100	100	100	100
	Agf/Csg	csgB	1	1	1	1	1	1	1	1	1	1	1	1	1	csgB	csgB	core	1190	99.916	100	99.4536	100	100	100	100	100	100	100
	Agf/Csg	csgC	1	1	1	1	1	1	1	1	1	1	1	1	1	csgC	csgC	core	1191	100	100	100	100	100	100	100	100	100	100
	Agf/Csg	csgD	1	1	1	1	1	1	1	1	1	1	1	1	1	group_4166	csgD	core	1190	99.916	100	99.4536	100	100	100	100	100	100	100
	Agf/Csg	csgE	1	1	1	1	1	1	1	1	1	1	1	1	1	csgE	csgE	core	1190	99.916	100	99.4536	100	100	100	100	100	100	100
	Agf/Csg	csgF	1	1	1	1	1	1	1	1	1	1	1	1	1	csgF	csgF	core	1190	99.916	100	99.4536	100	100	100	100	100	100	100
	Agf/Csg	csgG	1	1	1	1	1	1	1	1	1	1	1	1	1	csgG	csgG	core	1190	99.916	100	99.4536	100	100	100	100	100	100	100
	Bcf	bcfA	1	1	1		1	1	1	1	1					group_3262	BcfA/fimA	shell	1079	90.5961	100	96.1749	93.8776	100	100	100	95.5882	0	0
		bcfB	1	1	1		1	1	1	1	1					fimC~~~bcfB	BcfB	shell	1079	90.5961	100	96.1749	93.8776	100	100	100	95.5882	0	0
		bcfC	1	1	1		1	1	1	1	1					fimD~~~bcfC	BcfC/fimD	shell	1079	90.5961	100	96.1749	93.8776	100	100	100	95.5882	0	0
		bcfD	1	1	1		1	1	1	1	1					group_1860	BcfD/fimA	shell	1079	90.5961	100	96.1749	93.8776	100	100	100	95.5882	0	0
		bcfE	1	1	1		1	1	1	1	1					group_1786	BcfE/fimA	shell	1079	90.5961	100	96.1749	93.8776	100	100	100	95.5882	0	0
		bcfF	1	1	1		1*	1	1	1	1					group_1692	BcfF	shell	1079	90.5961	100	96.1749	93.8776	100	100	100	95.5882	0	0
		bcfG	1	1	1		1	1	1	1	1					bcfG	BcfG	shell	1079	90.5961	100	96.1749	93.8776	100	100	100	95.5882	0	0
	Fim	fimA	1	1	1	1	1	1	1	1	1	1	1	1	1	fimA	fimA	core	1191	100	100	100	100	100	100	100	100	100	100
		fimC	1	1	1	1	1	1	1	1	1	1	1	1	1	fimC	fimC	core	1191	100	100	100	100	100	100	100	100	100	100
		fimD	1	1	1	1	1	1	1	1	1	1	1	1	1	fimD	fimD	core	1191	100	100	100	100	100	100	100	100	100	100
		fimF	1	1	1	1	1	1	1	1	1	1	1	1	1	fimF	fimF	core	1191	100	100	100	100	100	100	100	100	100	100
		fimH	1	1	1	1	1	1	1	1	1	1	1	1	1	fimH	fimH	core	1191	100	100	100	100	100	100	100	100	100	100
		fimI	1	1	1	1	1	1	1	1	1	1	1	1	1	fimI	fimI	core	1191	100	100	100	100	100	100	100	100	100	100
		fimW	1	1	1	1	1	1	1	1	1	1	1	1	1	fimW	fimW	core	1191	100	100	100	100	100	100	100	100	100	100
		fimY	1	1	1	1	1	1	1	1	1	1	1	1	1	fimY	fimY	core	1191	100	100	100	100	100	100	100	100	100	100
		fimZ	1	1	1	1	1	1	1	1	1	1	1	1	1	fimZ	fimZ	core	1190	99.916	99.7319	100	100	100	100	100	100	100	100
	Peg	pegA	1	1	1	1	1	1	1	1	1	1	1	1	1	yehD	pegA	core	1190	99.916	100	100	100	99.6825	100	100	100	100	100
		pegB	1	1	1	1	1	1	1	1	1	1	1	1	1	group_2351	pegB	core	1190	99.916	100	100	100	99.6825	100	100	100	100	100
		pegC	1	1	1	1	1	1	1	1	1	1	1	1	1	group_2417	pegC	core	1190	99.916	100	100	100	99.6825	100	100	100	100	100
		pegD	1	1	1	1	1	1	1	1	1	1	1	1	1	group_2082	pegD	core	1190	99.916	100	100	100	99.6825	100	100	100	100	100
	Saf	safA
		safB					1									safB	safB	cloud	30	2.51889	0	0	0	0	100	0	0	0	0
		safC					1									group_1936	safC/fimD	cloud	31	2.60285	0	0	0	0	100	0	0	0	0
		safD					1									group_2442	SafD	cloud	31	2.60285	0	0	0	0	100	0	0	0	0
	Sta	staA	1	1	1	1	1	1	1	1	1	1	1	1	1	group_3686	staA	core	1191	100	100	100	100	100	100	100	100	100	100
		staB	1	1	1	1	1	1	1	1	1	1	1	1	1	group_4557	staB	core	1191	100	100	100	100	100	100	100	100	100	100
		staC	1	1	1	1	1	1	1	1	1	1	1	1	1	group_3336	staC	core	1191	100	100	100	100	100	100	100	100	100	100
		staD	1	1	1	1	1	1	1	1	1	1	1	1	1	group_1182	staD	core	1191	100	100	100	100	100	100	100	100	100	100
		staE	1	1	1	1	1	1	1	1	1	1	1	1	1	staE	staE	core	1191	100	100	100	100	100	100	100	100	100	100
		staF	1	1	1	1	1	1	1	1	1	1	1	1	1	group_1781	staF	core	1191	100	100	100	100	100	100	100	100	100	100
		staG	1	1	1	1	1	1	1	1	1	1	1	1	1	group_2343	staG	core	1191	100	100	100	100	100	100	100	100	100	100
	Std	stdA	1	1	1	1	1	1	1		1	1	1	1	1	group_3781	stdA	soft	1165	97.817	100	100	100	100	100	97.5	100	96.5517	100
		stdB	1	1	1	1	1	1		1	1			1	1	stdB/group_3113	stdB	shell	1135	95.3	100	100	100	100	100	100	100	0	100
		stdC	1	1	1	1	1	1	1	1	1		1	1	1	stdC/group_2490	stdC	shell	1135	95.3	100	100	100	100	100	100	100	0	100
	Stf	stfA	1	1	1	1	1	1	1	1	1	1	1	1	1	stfA	stfA	core	1191	100	100	100	100	100	100	100	100	100	100
		stfC	1	1	1	1	1	1	1	1	1	1	1	1	1	group_2362	stfC/fimD	core	1191	100	100	100	100	100	100	100	100	100	100
		stfD	1	1	1	1	1*	1	1*	1	1	1	1	1	1	stfD	stfD	core	1191	100	100	100	100	100	100	100	100	100	100
		stfE	1	1	1	1	1	1	1	1	1	1	1	1	1	group_2091	stfE	core	1191	100	100	100	100	100	100	100	100	100	100
		stfF	1	1	1	1	1	1	1	1	1	1	1*	1	1	stfF	stfF	core	1191	100	100	100	100	100	100	100	100	100	100
		stfG	1	1	1	1	1	1	1	1	1	1	1	1*	1	group_2361	stfG	core	1191	100	100	100	100	100	100	100	100	100	100
																group_1874	stfH	core	1191	100	100	100	100	100	100	100	100	100	100
	Stg	stgA	1	1	1	1	1	1	1	1	1	1	1	1	1	lpfA	stgA	core	1191	100	100	100	100	100	100	100	100	100	100
		stgB	1	1	1	1	1	1	1	1	1	1	1	1	1	lfpB	stgB	core	1191	100	100	100	100	100	100	100	100	100	100
		stgC/ lpfC	1	1	1	1	1	1	1	1	1	1	1	1	1	group_2757	stgC/ lpfC	core	1191	100	100	100	100	100	100	100	100	100	100
		stgD	1	1	1	1	1	1	1	1	1	1	1	1	1	stgD	stgD	core	1191	100	100	100	100	100	100	100	100	100	100
	Sth	sthA	1	1	1	1	1	1	1	1	1	1	1	1	1	group_2489	sthA	core	1188	99.7481	100	100	100	100	100	100	95.5882	100	100
		sthB	1	1	1	1	1	1	1	1		1	1	1	1	group_2710	sthB	core	1188	99.7481	100	100	100	100	100	100	95.5882	100	100
		sthC	1	1	1	1	1	1	1		1				1	group_2516	sthC/fimD	core	1191	100	100	100	100	100	100	100	100	100	100
		sthD	1	1	1	1	1	1	1	1	1	1	1		1	group_1688	SthD/fimA	core	1187	99.6641	100	100	100	100	100	100	100	100	100
		sthE	1	1	1	1	1	1	1	1	1	1	1		1	sthE	sthE	core	1191	100	100	100	100	100	100	100	100	100	100
Macrophage inducible genes	Pef - Sef - Stb - Stc - Ste - Sti - Stj - Stk - Lpf - Tcf
	Mig-14	mig-14	1	1	1	1	1	1	1	1	1	1	1	1	1	mig14	mig-14	core	1191	100	100	100	100	100	100	100	100	100	100
Magnesium uptake	Mig-5	mig-5
	Mg2+ transport	mgtB	1	1	1	1	1	1	1	1	1	1	1	1	1	mgtB	mgtB	core	1189	99.8321	100	100	100	99.6825	100	100	100	100	100
Nonfimbrial adherence determinants	Mg2+ transport	mgtC	1	1	1	1	1	1	1	1	1	1	1	1	1	mgtC	mgtC	core	1189	99.8321	100	100	100	99.6825	100	100	100	100	100
	MisL	misL		1	1		1		1							misL	misL	shell	438	36.7758	0	0	87.7551	99.0476	100	100	0	0	0
	RatB	ratB	1	1	1	1	1	1	1	1	1	1	1	1	1	ratB	ratB;	core	1191	100	100	100	100	100	100	100	100	100	100
	ShdA	shdA	1	1	1	1	1	1	1	1	1	1	1	1	1	aidA	ShdA	core	1190	99.916	100	100	100	100	100	100	100	100	100
Regulation	SinH	sinH	1	1	1	1	1	1	1	1	1*	1	1	1	1	sinH	sinH	core	1191	100	100	100	100	100	100	100	100	100	100
	PhoPQ	phoP	1	1	1	1	1	1	1	1	1	1	1	1	1	phoP	phoP	core	1191	100	100	100	100	100	100	100	100	100	100
Secretion system	PhoPQ	phoQ	1	1	1	1	1	1	1	1	1	1	1	1 in short read*	1	phoQ	phoQ	core	1191	100	100	100	100	100	100	100	100	100	100
	TTSS (SPI-1 encode)	hilA	1	1	1	1	1	1	1	1	1	1	1	1	1	nrfG~~~hilA	nrfGhilA	core	1189	99.8321	100	99.4536	100	100	100	100	100	100	100
		hilC	1	1	1	1	1	1	1	1	1	1	1	1	1	hilC	hilC	core	1183	99.3283	98.9276	98.9071	100	99.3651	100	100	100	100	100
		hilD	1	1	1	1	1	1	1	1	1	1	1	1	1	hilD	hilD	core	1181	99.1604	100	98.3607	100	98.0952	100	100	100	100	100
		iacP	1	1	1	1	1	1	1	1	1	1	1	1	1	iacP	iacP	core	1188	99.7481	100	100	100	99.0476	100	100	100	100	100
		iagB	1	1	1	1	1	1	1	1	1	1	1	1	1	iagB	iagB	core	1190	99.916	100	99.4536	100	100	100	100	100	100	100
		invA	1	1	1	1	1	1	1	1	1	1	1	1	1	invA	invA	core	1191	100	100	100	100	100	100	100	100	100	100
		invB	1	1	1	1	1	1	1	1	1	1	1	1	1	spaK	invB	core	1191	100	100	100	100	100	100	100	100	100	100
		invC	1	1	1	1	1	1	1	1	1	1	1	1	1	invC	invC	core	1191	100	100	100	100	100	100	100	100	100	100
		invE	1	1	1	1	1	1	1	1	1	1	1	1	1	invE	invE	core	1191	100	100	100	100	100	100	100	100	100	100
		invF	1	1	1	1	1	1	1	1	1	1	1	1	1	invF	invF	core	1190	99.916	100	100	100	99.6825	100	100	100	100	100
		invG	1	1	1	1	1	1	1	1	1	1	1	1	1	invG	invG	core	1191	100	100	100	100	100	100	100	100	100	100
		invH	1	1	1	1	1	1	1	1	1	1	1	1	1	invH	invH	core	1191	100	100	100	100	100	100	100	100	100	100
		invI	1	1	1	1	1	1	1	1	1	1	1	1	1	spaM	invI;spaM	core	1191	100	100	100	100	100	100	100	100	100	100
		invJ	1	1	1	1	1	1	1	1	1	1	1	1	1	spaN	invJ;spaN	core	1191	100	100	100	100	100	100	100	100	100	100
		orgA	1	1	1	1	1	1	1	1	1	1	1	1	1	orgA	orgA	core	1191	100	100	100	100	100	100	100	100	100	100
		orgB	1	1	1	1	1	1	1	1	1	1	1	1	1	orgB	orgB	core	1190	99.916	99.7319	100	100	100	100	100	100	100	100
		orgC	1	1	1	1	1	1	1	1	1	1	1	1	1	orgC	orgC	core	1182	99.2443	98.9276	99.4536	100	99.3651	100	100	100	98.2759	100
		prgH	1	1	1	1	1	1	1	1	1	1	1	1	1	prgH	prgH	core	1191	100	100	100	100	100	100	100	100	100	100
		prgI	1	1	1	1	1	1	1	1	1	1	1	1	1	prgI	prgI	core	1191	100	100	100	100	100	100	100	100	100	100
		prgJ	1	1	1	1	1	1	1	1	1	1	1	1	1	prgJ	prgJ	core	1191	100	100	100	100	100	100	100	100	100	100
		prgK	1	1	1	1	1	1	1	1	1	1	1	1	1	prgK	prgK	core	1191	100	100	100	100	100	100	100	100	100	100
		sicA	1	1	1	1	1	1	1	1	1	1	1	1	1	sicA	sicA	core	1191	100	100	100	100	100	100	100	100	100	100
		sicP	1	1	1	1	1	1	1	1	1	1	1	1	1	sicP	sicP	core	1185	99.4962	100	99.4536	100	98.4127	100	100	100	100	100
		sipD	1	1	1	1	1	1	1	1	1	1	1	1	1	sctA~~~sipD	sipD;sctA	core	1191	100	100	100	100	100	100	100	100	100	100
		spaO	1	1	1	1	1	1	1	1	1	1	1	1	1	spaO	spaO	core	1191	100	100	100	100	100	100	100	100	100	100
		spaP	1	1	1	1	1	1	1	1	1	1	1	1	1	spaP	spaP	core	1191	100	100	100	100	100	100	100	100	100	100
		spaQ	1	1	1	1	1	1	1	1	1	1	1	1	1	spaQ	spaQ	core	1191	100	100	100	100	100	100	100	100	100	100
		spaR	1	1	1	1	1	1	1	1	1	1	1	1	1	spaR	spaR	core	1191	100	100	100	100	100	100	100	100	100	100
		spaS	1	1	1	1	1	1	1	1	1	1	1	1	1	spaS	spaS	core	1191	100	100	100	100	100	100	100	100	100	100
		sprB	1	1	1	1	1	1	1	1	1	1	1	1	1	csgD~~~sprB	sprB	core	1189	99.8321	99.4638	100	100	100	100	100	100	100	100
	TTSS (SPI-2 encode)	ssaC	1	1	1	1	1	1	1	1	1	1	1	1	1	sctC2~~~spiA	ssaC	soft/cloud	1191	100	100	99.5	100	100	100	100	100	100	100
		ssaD	1	1	1	1	1	1	1	1	1	1	1	1	1	sctD~~~ssaD	ssaD/sctD;	soft	1159	97.3132	96.5147	98.3607	95.9184	97.7778	100	97.5	94.1176	98.2759	100
		ssaE	1	1	1	1	1	1	1	1	1	1	1	1	1	ssaE	ssaE	shell	1105	92.7792	93.0295	92.3497	93.8776	93.3333	100	85	91.1765	89.6552	100
		ssaG	1	1	1	1	1	1	1	1	1	1	1	1	1	sctF~~~ssaG	ssaG;sctF;	core	1183	99.3283	99.7319	97.8142	100	99.3651	100	100	100	100	100
		ssaH	1	1	1	1	1	1	1	1	1	1	1	1	1	ssaH	ssaH	core	1188	99.7481	100	99.4536	100	100	100	97.5	100	100	100
		ssaI	1	1	1	1	1	1	1	1	1	1	1	1	1	ssaI	ssaI	core	1186	99.5802	99.7319	99.4536	100	99.6825	100	97.5	100	100	100
		ssaJ	1	1	1	1	1	1	1	1	1	1	1	1	1	ssaJ	ssaJ	core	1190	99.916	100	100	100	99.6825	100	100	100	100	100
		ssaK	1	1	1	1	1	1	1	1	1	1	1	1	1	ssaK	ssaK	core	1189	99.8321	100	99.4536	100	100	100	100	100	100	100
		ssaL	1	1	1	1	1	1	1	1	1	1	1	1	1	ssaL	ssaL	core	1191	100	100	100	100	100	100	100	100	100	100
		ssaM	1	1	1	1	1	1	1	1	1	1	1	1	1	ssaM	ssaM	core	1191	100	100	100	100	100	100	100	100	100	100
		ssaN	1	1	1	1	1	1	1	1	1	1	1	1	1	ssaN	ssaN	core	1191	100	100	100	100	100	100	100	100	100	100
		ssaO	1	1	1	1	1	1	1	1	1	1	1	1	1	ssaO	ssaO	core	1190	99.916	100	100	100	99.6825	100	100	100	100	100
		ssaP	1	1	1	1	1	1	1	1	1	1	1	1	1	ssaP	ssaP	core	1188	99.7481	100	100	100	99.0476	100	100	100	100	100
		ssaQ	1	1	1	1	1	1	1	1	1	1	1	1	1	ssaQ	ssaQ	core	1191	100	100	100	100	100	100	100	100	100	100
		ssaR	1	1	1	1	1	1	1	1	1	1	1	1	1	ssaR	ssaR	core	1191	100	100	100	100	100	100	100	100	100	100
		ssaS	1	1	1	1	1	1	1	1	1	1	1	1	1	ssas	ssas	core	1190	99.916	100	100	100	100	100	97.5	100	100	100
		ssaT	1	1	1	1	1	1	1	1	1	1	1	1	1	escT~~~ssaT	ssaT/escT	core	1180	99.0764	100	98.3607	100	98.4127	100	95	98.5294	100	100
		ssaU	1	1	1	1	1	1	1	1	1	1	1	1	1	escU~~~ssaU	ssaU/escU	core	1189	99.8321	100	99.4536	100	99.6825	100	100	100	100	100
		ssaV	1	1	1	1	1	1	1	1	1	1	1	1	1	ssaV	ssaV	core	1191	100	100	100	100	100	100	100	100	100	100
		sscA	1	1	1	1	1	1	1	1	1	1	1	1	1	sscA	sscA	core	1191	100	100	100	100	100	100	100	100	100	100
		sscB	1	1	1	1	1	1	1	1	1	1	1	1	1	sscB	sscB	core	1187	99.6641	100	100	100	99.6825	100	100	98.5294	96.5517	100
		sseA	1	1	1	1	1	1	1	1	1	1	1	1	1	group_4734	sseA	core	1186	99.5802	99.4638	99.4536	100	99.6825	100	100	100	98.2759	100
		sseB	1	1	1	1	1	1	1	1	1	1	1	1	1	group_2295	sseB	core	1191	100	100	100	100	100	100	100	100	100	100
		sseC	1	1	1	1	1	1	1	1	1	1	1	1	1	group_2388	sseC	core	1188	99.7481	99.4638	99.4536	100	100	100	100	100	100	100
		sseD	1	1	1	1	1	1	1	1	1	1	1	1	1	sseD	sseD	core	1189	99.8321	100	100	100	99.6825	100	100	98.5294	100	100
		sseE	1	1	1	1	1	1	1	1	1	1	1	1	1	sseE	sseE	core	1187	99.6641	100	99.4536	100	99.6825	100	100	97.0588	100	100
		ssrA	1	1	1	1	1	1	1	1	1	1	1	1	1	ssrA~~~cheY	ssrAcheY	core	1189	99.8321	100	99.4536	100	99.6825	100	100	100	100	100
		ssrB	1	1	1	1	1	1	1	1	1	1	1	1	1	ssrB	ssrB	core	1191	100	100	100	100	100	100	100	100	100	100
	TTSS effectors	slrP	1	1	1	1	1	1	1	1	1	1	1	1	1	slrP	slrP	core	1191	100	100	100	100	100	100	100	100	100	100
		sspH1	1	1	1	1	1	1	1	1	1	1	1	1	1	sspH1	sspH1	core	1187	99.6641	100	100	100	100	100	100	95.5882	100	100
	TTSS-1 translocated effectors	avrA
		sipA	1	1	1	1	1	1	1	1	1	1	1	1	1	sipA	sipA	core	1191	100	100	100	100	100	100	100	100	100	100
		sipB	1	1	1	1	1	1	1	1	1	1	1	1	1	sipB	sipB	core	1191	100	100	100	100	100	100	100	100	100	100
		sipC	1	1	1	1	1	1	1	1	1	1	1	1	1	sipC	sipC	core	1190	99.916	99.7319	100	100	100	100	100	100	100	100
		sopA	1	1	1	1	1	1	1	1	1	1	1	1	1	sopA~~~yjbI	sopA;yjbI	core	1187	99.6641	100	100	100	99.6825	100	100	100	96.5517	95.2381
		sopB/sigD	1	1	1	1	1	1	1	1	1	1	1	1	1	sopB	sopB	core	1188	99.7481	100	100	100	100	100	100	97.0588	100	100
		sopD	1	1	1	1	1	1	1	1	1	1	1	1	1	sopD	sopD	core	1190	99.916	100	100	100	100	100	100	98.5294	100	100
		sopD2
		sopE2	1	1	1	1	1	1	1	1		1	1	1	1	sopE2	sopE2	soft	1168	98.0688	97.5871	99.4536	91.8367	98.7302	100	95	98.5294	98.2759	100
		sopE	1		1	1	1	1	1	1	1	1	1	1	1	sopE/group_5261	sopE	shell	1128	94.7103	98.9276	99.4536	87.7551	86.6667	100	97.5	91.1765	98.2759	109.524
		spvC
		spvD
		sptP	1	1	1	1	1	1	1	1	1	1	1	1	1	sptP	sptP	core	1187	99.6641	100	99.4536	97.9592	99.3651	100	100	100	100	100
	TTSS-2 translocated effectors	gogB	1	1	1	1		1	1	1	1	1	1	1	1	gogB	GogB	shell	922	77.4139	76.4075	24.0437	81.6327	98.0952	83.3333	95	98.5294	100	100
		pipB2	1	1	1	1	1	1	1	1	1	1	1	1	1	pipB2	pipB2	core	1191	100	100	100	100	100	100	100	100	100	100
		pipB	1	1	1	1	1	1	1	1	1	1	1	1	1	pipB	pipB	core	1184	99.4123	99.7319	100	100	100	100	100	95.5882	98.2759	95.2381
		sifA	1*	1	1	1	1	1	1	1	1	1	1		1	sifA	sifA	core	1188	99.7481	100	100	100	100	100	100	100	100	100
		sifB	1	1	1	1	1	1	1	1	1	1	1	1	1	sifB	sifB	core	1188	99.7481	100	99.4536	100	99.6825	100	100	98.5294	100	100
		spiC/ssaB	1	1	1	1	1	1	1	1	1	1	1	1	1	spiC/group_4609	spiC	shell	1117	93.7867	95.1743	90.1639	91.8367	95.873	100	90	94.1176	86.2069	100
		sseF	1	1	1		1	1	1	1	1	1	1	1	1	sseF	sseF	core	1185	99.4962	99.4638	99.4536	100	99.3651	100	100	100	100	100
		sseG	1	1	1	1	1	1	1	1	1	1	1	1	1	sseG	sseG	core	1184	99.4123	98.6595	99.4536	100	99.6825	100	100	100	100	100
		sseI/srfH										1				sseI	sseI	cloud	54	4.53401	0	0	0	0	0	0	0	93.1034	0
		sseJ	1	1	1	1	1	1	1	1	1	1	1	1	1	sseJ	sseJ	core	1184	99.4123	100	100	100	99.3651	100	100	95.5882	100	100
		sseK1	1	1	1	1	1	1	1	1	1	1	1	1	1	sseK1	sseK1	core	1183	99.3283	98.9276	98.9071	100	99.6825	100	100	100	100	100
		sseK2		1		1				1	1	1	1	1	1	sseK	sseK	shell	319	26.7842	0	0	93.8776	31.746	3.33333	2.5	100	98.2759	100
		sseL	1	1	1	1	1	1	1	1	1	1	1	1	1	sseL	sseL	soft	1169	98.1528	98.9276	98.3607	100	96.5079	100	100	98.5294	96.5517	100
		sspH2	1	1	1	1	1	1	1	1	1	1	1	1	1	sspH2~~~lRR	sspH2	core	1190	99.916	100	100	100	99.6825	100	100	100	100	100
Toxin	Typhoid toxin	cdtB	1	1	1	1	1	1	1	1	1	1	1	1	1	cdtB/group_6962	cdtB	soft	1167	97.9849	98.9276	98.9071	93.8776	98.7302	100	97.5	98.5294	94.8276	80.9524
		pltA					1	1	1	1			1			pltA	pltA	cloud	167	14.0218	0.80429	0	0	0	100	90	66.1765	82.7586	0
		pltB	1				1	1	1	1			1			pltB	pltB	shell	502	42.1495	61.9303	51.9126	46.9388	0	100	75	67.6471	68.9655	0
		spvB
