# Supplementary material for: Global population genomics of Salmonella enterica serotype Napoli, an emerging pathogen with an unusual epidemiologic pattern
Source: Research Square preprint supplement (doi:10.21203/rs.3.rs-8608855/v1), 2026-01-16
Supplement: Supplementary file 9 [file f9559d41da97276b3ff15415.xlsx]

## Sheet: Data 8
Spacer name	CRISPR region	Sequence	No. of SNV vs main	Spacer length	Hit in phage (YES) and prophage (PP)*	Comments
STM1var1	CR1	AGGGGCGTTCCGCAGTCGGCAAGGGCTGAAAA		32		highly conserved in Salmonella first on iap's side
TAmB4	CR1	AATCACGTAACCCTGCCGCCGTTACGTGAAAA		32		no hits on NCBI
EnTB0vAr1	CR1	TGCTACACGCAAAAATTCCAGTCGTTGGCGCA		32		highly conserved in Salmonella
Ndo14	CR1	GCTTCGAATGATGGAAAGACAGGAGTTATCTT		32		highly conserved in Salmonella
Ndo15	CR1	GTTGTGGGCGTTTTCTGACTGAGTTGGTTCAG		32
HueB2	CR1	GCTATCACCGCGGCGCATAGCCTTACCAATTT		32		S. salamae CRISPR & serovar Cubana from USA; CRISPR LHICA_E1 broiler feces in Spain
HueB2var1	CR1	ACTATCACCGCGGCGCATAGCCTTACCAATTT		32
Nap1	CR1	CTTCATACGCTTTGCGGTAAAGATGCGGAGCC		32		only hits in CRISPR Napoli, Albany, Duesseldorf, serovar 43:a:1,7 ; all CRISPR
Nap10	CR1	ACTCAAAGGCCCGAAAGGCGAACCTGCTCCGG		32	YES	Vibrio prophage; Serratia pphage PHAGE_Vibrio_12B12_NC_021070; Napoli & 17 orther Salmo with complete genomes in NCBI; CTT in CP185735.1 Serratia plymuthica strain G25-16 chromosome
Nap10var1	CR1	ACTCAAAGGCCCGAAAGGCGAACCTGCTCCAG	1	32	YES
Nap10var2	CR1	ACTAAAAGGCCCGAAAGGCGAACCTGCTCCGC	2	32	YES
Nap10var3	CR1	ACTCAAAGGCCCGAAAGGCGAACCTGCTCCGC	1	32	YES
Nap10var4	CR1	ACTAAAAGGCCCGAAAGGCGAACCTGCTCCGG	1	32	YES
Nap11	CR1	CATGAAGTCTTCAAGGGACTTCAGGGAATAGC		32		no hits on NCBI
Nap12	CR1	TTAATAGATATTCGCGCTAATACAACTCAATC		32		no hits on NCBI
Nap12var2	CR1	TTAATAGATATTCGCGCTAATACATCTCAATC	2	32
Nap16	CR1	ATCCAGTGACAGATGAGGGTTCACCATACTCA		32		no hits on NCBI
Nap17	CR1	TCCCCGGCACCACTAATCAACTCCGGCGCTCG		32		no hits on NCBI
Nap18	CR1	CATCTGCATATCAGCACCGAATGACGCCATGA		32		no hits on NCBI
Nap18var1	CR1	CATCTGCATATCAGCACAGAATGACGCCATGA	1	32
Nap19	CR1	TAAATGGATTTATCTTCACTCTGAACGCGATG		32		no hits on NCBI
Nap19var2	CR1	TAAATGTATTTATCTTCACTCTGAACGCGATG		32	PP	hit (2 SNP) S. salamae strain NCTC8273 in PHAGE_Salmon_118970_sal3_NC_031940(21) [Caudoviricetes]
Nap2	CR1	AGGCGCTCATTCTGAGGATCGGCGAGTTTATG		32		no hits on NCBI when 590 excluded
Nap20	CR1	TGCGGATCAGGAAATAGGAGTAATCCCCGCCC		32	PP	no hits on NCBI when 590 excluded; in 4 Salmonella 'plasmid' == likely complete prophage same hit as Nap21 and Nap23 Nap24 24 PHAGE_Entero_P1_NC_005856(41) [Caudoviricetes; Punavirus] of CP009570
Nap21	CR1	AGCAAGTTAAGGAAATGAGAGCGGCGAGATGC		32	PP	no hits on NCBI when 590 excluded; in 4 Salmonella 'plasmid' == likely complete prophage same hit as Nap20
Nap22	CR1	TTCTTGCTCAGTACACAGGTGAAGGTGAGTAT		32	YES	Phage Gifsy-2;Phage Gifsy-1; Salmonella phage SPN3UB; lot of hits in Salmonella corresponding to prophages eg in PHAGE_Salmon_SEN34_NC_028699(32) [Caudoviricete, Brunovirus] SPB B97 and in ISS64-4-17 ISS62-2-09, ISS88-1-03; ISS 133-3-03 WS1770
Nap23	CR1	ACCATCAGAAAGGCCAAATGCTTTTCGCTGAG		32	PP	no hits on NCBI when 590 excluded; 4 Salm "plasmids" PHAGE_Entero_P1_NC_005856(41) in prophage PHAGE_Entero_P1_NC_005856(41)
Nap24	CR1	GAACGGTATGTTCTGCGGCAATGACATACTGA		32	YES, PP	Caudoviricetes; Cronobacter phage JK004; and Salmonella "plasmids" CP009570 in prophage PHAGE_Entero_P1_NC_005856(41)
Nap27	CR1	CATGAAGATCATCCCGCTATTACATCTATCTC		32		no hits on NCBI
Nap30	CR1	TTCAATATACTCTTTGAGTGGCATTTTATTAC		32		no hits on NCBI
Nap31	CR1	ATCGTACCCATATTTAGCCATAACATTATTCA		32		no hits on NCBI when 590 excluded
Nap3	CR1	GGCACGTCAGACTGACGTATCGCTATACCCCA		32		no hits on NCBI when 590 excluded
Nap3var1	CR1	GGCACGTCAGACTGACGTATCGCTATCCCA	2	30
Nap3var2	CR1	GGCACGTCAGACTAACGTATCGCTATACCCCA	1	32
Nap4	CR1	ATCTCCGCGTTAAAAATCATTCCGCGCTCTTT		32	YES, PP	Many Caudoviricetes; hits in Klebsiella one checked == questionnable prophage according to PHASTEST "PHAGE_Pseudo_PMG1_NC_016765(3)"; or PHAGE_Erwini_vB_EhrS_59_NC_048198(18) in CP153608; phage of S. houtenae strain NCTC7318
Nap5	CR1	ACGTTGGTGATAGGGAGTGGTGGCAATAAAAT		32	PP	no hits on NCBI when 590 excluded; hit in serovar Sloterdijk str. ATCC 15791 2 SNp difference targetting a Pphage protein COG1783.
Nap5var1	CR1	ACGTTGGTGATAGGGAATGGTGGCAATAAAAT	1	32
Nap6	CR1	GCGCTGGCGGGGTGGGATGAGGCTGAGGAAAC		32		no hits on NCBI when 590 excluded
Nap6var1	CR1	CGGTTTATCCCCGCTGGCGGGGTGGGATGAGGCTGAGGAAAC	11	42		recombinant with DR
Nap6var2	CR1	GCGCTGGCGGGGTGGGATGAGGCTGAGGCTGAGGAAAC	19	38		recombinant with DR
Nap7	CR1	TTACTCGCTCTAGTAATAAGGAAAATTTATGC		32		no hits on NCBI when 590 excluded
Nap8	CR1	GAGGGCGAGCCGGAAGTGCTGGAGGTTCGCGC		32		hits in Peptidoglycan recognition proteins (PGRPs) are innate immunity molecules present in insect, here Schistocerca
Nap9	CR1	CCGGCAAACGATACGCAGTCACGATCAATCAC		32		no hits on NCBI when 590 excluded
Nap9var4	CR1	CCGGCAAACGATACGCAGTCACGATCAATCGC	1	32
Nap9var5	CR1	TCGGCAAACGATACGCAGTCACGATCAATCAC	1	32
Nap32|	CR1	CCGGCAAACGATACGCAGTCACGATCTCGCGC		32
NapB1	CR2	CATCTCACGCGAGGCGCGGATTTTTGAGCCGA		32	PP	hits (2SNP) in a prophage PHAGE_Vibrio_12B12_NC_021070(28) hosted in Citrobacter chromosome (eg CP124809.1)
NapB10	CR2	TGTGTCGCCGGAAGTCGCTACCTTGAATCTTG		32
NapB11	CR2	GTGCGTTCAAATAAATCGCGTTGGAATGGATA		32
NapB12	CR2	GTCAACATCCCCGTAACATCTTATTTTGTGCT		32
NapB13	CR2	AAACCATATCCGGCTACCGGTATGGTTCAGGT		32
NapB13var1	CR2	AAACCATATCCGGCTACCGGTATAGTTCAGGT	1	32
NapB14	CR2	AAGATGCTGCCGGATACTATTAAACCGGAACA		32
NapB15	CR2	GCCGGTGCGGTGTTCGTCGTGACCGCCGCCAC		32		only one hit (2 SNP) in one CDS of OX638344 Acidimicrobiales bacterium isolate found in sponge metagenome
NapB15var1	CR2	GCCGGTGCGGTGTTCGTCGTGACCGCCACCAC	1	32
NapB16	CR2	AAGTCAGTGTTGTCATTGATCTGGTGGGCAAC		32
NapB16var1	CR2	AAGTCAGTGTTGTCATTGATCTGGAGGGCAAC	1	32
NapB16var2	CR2	AAGTCAGCGTTGTCATTGATCTGGTGGGCAAC	1	32
NapB17	CR2	ACGCTGATGCCCGGCGACGGGCGGCGCACGCT		32	?	hits (2 SNP) on Tistrella mobilis in the CDS of "rlmN" "23S rRNA (adenine(2503)-C(2))-methyltransferase RlmN"rlmN E coli mutants show error-prone phenotype via tRNA methylation/absence of methylation
NapB17var1	CR2	ACGCCGATGCCCGGCGACGGGCGGCGCACGCT	1	32	?
NapB18	CR2	GTCGGCGACCACCTGCGGCCACACCTGAGCGCC		33	PP	hit 100% in 1 x Modestobacter chrom and 3x E coli plasmids (eg CP159692.1 ) in prophage region PHAGE_Escher_503458_NC_049341(4)in the CDS of "ParB/RepB/Spo0J family partition protein"
NapB18var1	CR2	GTCGGCGACCACCTGCGGCCACACCGCGGAGCC	4	33	PP
NapB19	CR2	CGCCTGATATAGATTTCTGTGAATGCCTCATT		32	PP	hit (2 SNP) S. salamae strain NCTC8273 in PHAGE_Salmon_118970_sal3_NC_031940(21) [Caudoviricetes]
NapB2	CR2	AGCTATCTCGACGTGAACACAATCGCCACGCT		32
NapB20	CR2	GTGTTCCGGGCGTCCGAATTTCTGGATCACATC		33
NapB21	CR2	AAAACCGACGCCCAACGCCACAGGGAACGAGT		32
NapB22	CR2	TACTCTTCTGATATTTTTCGAATCTGCTCCCC		32
NapB23	CR2	CAGCACCTTACCCAGCGCCCGCCGTAGATCCC		32
NapB23var1	CR2	CAGCACCTTACCCAGCACCCGCCGTAGATCCC	1	32
NapB24	CR2	ATCAAAGATCACGCACCCGAAACCTACACCGG		32	?	target the locus coding for VirB3 family type IV secretion system protein in E. Coli Plasmid CP172162.1 with no phage inside detected by phastest april 2025
NapB25	CR2	ATAACGTTCTACCGTTCATTTAAAGGAATAAC		32
NapB26	CR2	GATTGTACACAATACGGGGTAAAATATTGCCC		32
NapB27	CR2	TTGAAATTCTGGTTTATAGACCGAATCGACGA		32
NapB28	CR2	CACCCATAACGCATGGGCGCGGTAAACATTAG		32	PP	1 SNV hit in prophage [cauvoviricetes] vB_EcoM-ep3 in Salmonella enterica strain NCTC10436 [II:57:z42:1,6:z23] isolated from Lizard in South Africe also see FXW 25/65 isolates of the same HC900
NapB29	CR2	ATGATGGCCCCTGCTCAGAAAACACAATCCCG		32
NapB3	CR2	GCGTCAAACCAGAAACATGAGTGGCAAATCGA		32	PP	serovar paraB__limete rare HC2000 CFSAN000549 in prophage PHAGE_Salmon_SPN9CC_NC_017985(3) [Caudoviricetes; Lederbergvirus] ;
NapB30	CR2	CCCTTAAGCCATTGCTCATTTGCGTAGGTATT		32	PP	only 3 hits on taxid 590 serovar Abeokuta in PHAGE_Burkho_BcepB1A_NC_005886(19) [Caudoviricetes],serovar Menston and species II ; not in CRISPR region
NapB31	CR2	CTATAACGGTAAGAGCATTGGCGATGAGCGGG	1	32	PP	only hits on taxid 590 ; on 5 plasmids that are in fact prophages e.g. CP146848 PHAGE_Salmon_SJ46_NC_031129(70) [Caudoviricetes, Punavirus] same as NapB31
NapB32	CR2	TTGAACCTGTTCGTCGCGAAGTGCTTCTTGCG	1	32	PP	only hits on taxid 590 ; on 4 plasmids that are in fact prophages e.g. CP146848 PHAGE_Salmon_SJ46_NC_031129(70) [Caudoviricetes, Punavirus]
NapB33	CR2	CAGTAAGGCTGCAAGATTGCTGGCATTACCTG	1	32	YES	Salmonella phage SEN34 (blastn word7; 53 x Salmonella [taxid 590] excluded), and propohage PHAGE_Entero_mEp237_NC_019704(23) [Caudoviricetes] hosted by Citrobacter isolates (eg CP085726.1 in CDS of helix-turn-helix domain-containing protein)
NapB34	CR2	GAGTCACTACCTGGCATTGATAAAATTCAAGC		32		no hit in taxid 590 (05/11/2024)
NapB34var1	CR2	GAGTCACTACTTGGCATTGATAAAATTCAAGC	1	32
NapB35	CR2	TCACTTTGTGACGTGTAATCACTGTATGAGGG		32		no hit in taxid 590 (05/11/2024)
NapB36	CR2	TGTTATGGATTACTTCACCCTCTTTGGCTTAC		32	?	Highly conserved 500 Salmonella & E.coli ; hit at the start rev compl of gene="hscB" "co-chaperone HscB" in CIP54.100; CIP54.115
NapB37	CR2	TCCAGTAGCGCAGCCATACGGCCTTTACGGCG		32		no hit in taxid 590 (05/11/2024)
NapB38	CR2	TCTTTTGCTCAGTGAATATTCAGCCAATTTAC	1	32	YES	hit with 2SNP on Caudoviricetes BK026713.1; citrobacter plamsids; 100% hit on Salmonella enterica strain 2014K-0203 wrongly assigned plasmid CP053410 == prophage PHAGE_Salmon_SSU5_NC_018843(96)
NapB38var1	CR2	TCTTTTGCTCAGTGAATATTCAGCCAATTAAC		32	YES
NapB4	CR2	TTCAGAGGCTCGATACCAGGATGGGATCGGGC		32	?	in ICE of K. pneumoniae CP152654.1; just berore/after DNA topoisomerase III ; Frequent in Salmonella; highly conserved found in Klebsiella and E. coli between toposiomerase III gene and the next one and is not in a prophage (PHASTEST predictions)
NapB5	CR2	ACACCCGGTTGCAATCAATGGTCTGGGGGCTG		32		hit (2SNP) in E. coli between CDS of protein_id="ANO90579.1" and "ANO90580.1" close to cas cse CP015229.1
NapB5var1	CR2	ACACCCGGTTGCGATCAATGGTCTGGGGGCTG	1	32
NapB5var2	CR2	ACACCCGGTTGCGATCAAATGGTCTGGGGGCTG	2	33
NapB6	CR2	TTGCCGCGCTGGTTGCCGTGGGCTGAAAAGTA		32	YES	TPA: Myoviridae sp. Ctitt1;E. coli -31/32nt - in CDS of terminase (eg Escherichia coli strain RHB19-C23 chromosome CP057640.1 the prophage PHAGE_Salmon_SI7_NC_049460(16) [Caudoviricetes])
NapB6var1	CR2	TTGCCGCGCTGGTTGCCGTGGGCTGGAAAGTA	1	32	YES
NapB7	CR2	CAGACCGTGGGCGATCTCATTTTGTGCCCGAC		32	PP	S. salamae; rare; PHAGE_Entero_Arya_NC_031048(7) [Caudoviricetes]
NapB8	CR2	TCAGCAATTCGCCGCAATCATTTTTTTGCTGC		32	PP	S. salamae in prophage close to PHAGE_Salmon_118970_sal3_NC_031940(21) [Caudoviricetes]
NapB9	CR2	TTGATCCAGCTCGGCGATGCGGCGTTCTGCGG		32	PP	Frequent in Salmonella , likely targetting prophages as in PHAGE_Salmon_SEN34_NC_028699(38) Caudauviricetes Brunovirus in Napoli S20154936 Enterobacteria phage epsilon15 NC_004775 [Caudoviricetes], in CP075144 Salmonella enterica subsp. diarizonae strain CFSAN030538 gene targeted ead/Ea22-like family protein corresponding to a Salmonella phage vB_SemP_Emek protein, as Gifsy-1, as in Klebsiella pr…
NapB9var1	CR2	TTGATCCAGATCGGCGATGCGGCGTTCTGCGG	1	32	PP
* NCBI blastn word size =7 in June 2024 , 1/ecluding taxid_590. 2/including only taxid_590 ; YES = hit in a phage, PP= hits in a prophage in bacterial genome, ? Hit in genome close to CDS important.
